# Supplementary material for: Current dichotomous metrics obscure trends in severe and extreme child growth failure
Source: PubMed Central journal article supplement (PMC9122330; doi:10.1126/sciadv.abm8954), 2022-05-20
Supplement: sciadv.abm8954_sm.pdf [file sciadv.abm8954_sm.pdf]

Supplementary Materials for

**Current dichotomous metrics obscure trends in severe and extreme child growth failure**

Ryan Fitzgerald, Helena Manguerra, Michael B. Arndt, William M. Gardner, Ya-Yin Chang, Bethany Zigler, Heather Jean Taylor, Kelly Bienhoff, David L. Smith, Christopher J. L. Murray, Simon I. Hay, Robert C. Reiner, Jr. Nicholas J. Kassebaum\*

\*Corresponding author. Email: [nickjk@uw.edu](mailto:nickjk@uw.edu)

Published 20 May 2022, *Sci. Adv.* **8**, eabm8954 (2022)

DOI: [10.1126/sciadv.abm8954](https://doi.org/10.1126/sciadv.abm8954)

**The PDF file includes:**

Methods - Additional Detail  
Tables S1 to S8  
Figs. S1 to S8  
Legends for data S1 to S4  
References

**Other Supplementary Material for this manuscript includes the following:**

Data S1 to S4

## Methods – Additional Detail

This study complies with the Guidelines for Accurate and Transparent Health Estimates Reporting (GATHER) (26) as detailed in Table S1, and International Committee of Medical Journal Editors (ICMJE) recommendations have been followed.

### Overview

We incorporated representative stunting, wasting, and underweight data in ST-GPR (spatiotemporal Gaussian process regression) models to estimate the prevalence of CGF below -2 and -3 standard deviations from the WHO Growth Standards median (1, 2) (See fig. S3 for data landscape maps; See fig. S1 for ST-GPR results and location-specific data sources). We then leveraged surveys that included individual-level stunting, wasting, and underweight observations in order to parameterize characteristic HAZ, WHZ, and WAZ curve shapes using an ensemble distribution modeling strategy. By optimizing characteristically shaped curves to align with age-, sex-, location-, and year-specific regression output, we estimated age- and sex-specific continuous HAZ, WHZ, and WAZ distributions for 204 countries and territories from 1990 to 2020 (See fig. S1 for CGF distributions for all locations). Final estimates of overall ( $< -2SD$ ), severe ( $< -3SD$ ), and extreme ( $< -4SD$ ) CGF reflect the prevalence of each severity as integrated from the estimated continuous distributions.

### Definitions

Child growth failure (CGF) is estimated using three indicators – stunting (height-for-age; HAZ), wasting (weight-for-height; WHZ), and underweight (weight-for-age; WAZ) – which are defined using the age- and sex-specific WHO growth standards for children aged 0-59 months (1). These standards were developed in the 2006 WHO Multicenter Growth Reference Study, which followed an international cohort of ideally nourished children (1). Here, HAZ, WHZ, and WAZ are measured in terms of Z-scores from these growth standards curve medians. Categorical terms are used to describe the severity of CGF represented by these Z-scores, as shown in Table S2. Here, overall CGF is inclusive of both severe and extreme CGF and severe CGF is inclusive of extreme CGF. In this analysis, the term overall CGF is used to refer to CGF below  $-2SD$ , and is therefore distinct from the term moderate CGF, which is exclusively used to refer to CGF Z-scores between  $-3SD$  and  $-2SD$ .

### Input data

We included data from population-representative surveys, administrative data sources, and published scientific literature. These sources can be categorized into three main data types: 1) age- and sex-specific microdata from population surveys, 2) tabulated reports, and 3) the WHO Global Database on Child Growth and Malnutrition (27). Here, microdata refers to a cross-sectional data source with individual-level observations of height, weight, and age. Tabulated reports contain sample sizes and prevalences of categorical forms of CGF, which may be reported in an age- and sex-specific fashion, or collectively for children under 5 years of age. These are often Demographic and Health Surveys and Multiple Indicator Cluster Surveys. The WHO Global Database on Child Growth and Malnutrition contains a large collection of tabulation sources which also contain sample sizes and prevalences of categorical forms of CGF. Studies that were not representative of a geography's population were excluded. Any study with self-reported height and weight values (as opposed to measurements from examinations) was also excluded. Final counts of sources included for stunting, wasting, and underweight

estimation are included in Table S3. Maps of input source counts can be seen in fig. S3. Sources used in each location for stunting, wasting, and underweight models can be seen in fig. S1, and a comprehensive list of input data sources used in this CGF analysis can be seen in Table S4.

### **Data processing**

Only data sources that were representative of a location's entire population were included in the analysis to avoid sampling bias. Clinical trials that recruited specific populations, studies that implemented interventions that could have affected measurements, or analyses that were in specific non-representative locations were excluded. Four data cleaning steps were performed to maximize internal consistency of the modeling dataset. First, microdata that reported height, weight, and age were converted into stunting, wasting, and underweight Z-scores using the 2006 Child Growth Standards and the LMS method (28). Any data with impossible values (negative height or weight) were dropped, and any Z-scores above 6SD or below -6SD were also dropped. Second, any tabulation data that were reported using the National Center for Health Statistics (NCHS) 1978 growth standards were transformed to corresponding values on the WHO 2006 Growth Standards curves. This was done using an OLS linear regression model and informed by a study that evaluated concordance between the two growth standards (29). Only overall (Z-score < -2SD) CGF prevalences were transformed, as this is where concordance was highest. Third, for any study that lacked a measure of mean Z-score for stunting, wasting, or underweight, we predicted a mean value for that study. To accomplish this, an ordinary-least-squares regression of mean Z-score versus overall (Z-score < -2SD) CGF prevalence was conducted for all sources where both were reported. Lastly, any data that were reported as both sexes combined, or for age groups broader than the GBD 2020 age groups for children under 5 (0-6 days, 7-27 days, 1-5 months, 6-11 months, 12-23 months, 2-4 years), were split into these most detailed groups. This process was conducted by applying the age and sex pattern from an ST-GPR (spatiotemporal Gaussian process regression) model which only included sources with age- and sex-specific data. Any data with sample sizes less than 5 after age sex disaggregation were excluded.

### **Modeling**

A four-step modeling strategy was employed and applied in parallel to stunting, wasting, and underweight. These four steps are described in detail below.

#### ***Ensemble weight fitting***

All microdata sources were included in the process of fitting ensemble weights to parameterize characteristic HAZ, WHZ, and WAZ curve shapes. Ten distributions were fit simultaneously to microdata sources: normal, log-normal, log-logistic, exponential, gamma, mirrored gamma, inverse gamma, Gumbel, mirrored Gumbel, and Weibull. All component distributions were parameterized using "methods of moments," meaning that each could be described as a function of the mean and variance of the CGF Z-score distribution. Ensemble weights were assigned to each distribution, and the resulting ensemble distribution was the weighted sum of these individual distributions. Previous iterations of GBD have optimized ensemble weight sets to minimize predictive error across the entire distribution of CGF Z-scores. However, GBD 2020 methodology includes advancements that allow for ensemble weight sets to specifically minimize predictive error at the most relevant portions of the curves, the tails of the distribution associated with disease, namely Z-scores of -3SD, -2SD, and -1SD. The optimization process

weighted the fit evenly at these three portions of the curve. The predictive error in these three portions of the curve was minimized across all input microdata sources simultaneously, with each input source weighted evenly. One hundred sets of initial weights were entered into an optimization algorithm that aimed to reduce this targeted predictive error across all input microdata sources, with final stunting, wasting, and underweight ensemble weight sets shown in Table S5.

### ***ST-GPR (spatiotemporal Gaussian process regression)***

All microdata were collapsed to calculate mean Z-score, overall (CGF < -2SD) prevalence, and severe (CGF < -3SD) prevalence which was added to all tabulation data, including the WHO Global Database on Child Growth and Malnutrition, to be used in ST-GPR (spatiotemporal Gaussian process regression). ST-GPR is a common modeling framework used across GBD that leverages strength of evidence across space and time to produce estimates for each age group, sex, year, and location (2).

The first step of the ST-GPR process is an ensemble mixed-effects linear regression. For each indicator, we identified potentially predictive covariates from the GBD covariates database and tested every combination of those covariates in a mixed-effects linear regression. In this analysis, indicator data points were regressed on the predictive covariates with nested random effects at the super-region, region, and location levels (See fig. S8 for region and super-region designations). Models where estimated coefficients were not statistically significant ( $p < 0.05$ ) or were not in the a priori expected direction were dropped. The remaining models were then ranked by their out-of-sample root-mean-square error (RMSE), with a weighted ensemble of the top-performing models ultimately used as the first-stage prior in ST-GPR. The covariates that were tested in CGF ensemble mixed-effects linear regression are shown in Table S6, with covariates that were ultimately selected shown with a star. Histograms in fig. S2 show the frequency with which selected covariates were included in ensemble priors, as well as the standardized betas of covariates in those models. Selected covariates were consistent across all ST-GPR models for stunting, wasting, and underweight.

The second step of ST-GPR is a regression that incorporates evidence from neighboring locations, proximate years, and similar age groups to smooth residuals in the estimate from the ensemble mixed-effects linear regression created in step 1. The spatiotemporal smoothing is controlled by three hyper-parameters ( $\zeta = \text{space}$ ,  $\lambda = \text{time}$ ,  $\Omega = \text{age}$ ), which were adjusted to maximize out-of-sample predictive validity throughout the entire time series.

The third step of ST-GPR is a Gaussian process regression that further smooths the residuals between observed data and the stage two estimate and estimates uncertainty in the final modeled estimate. The Gaussian process regression incorporates uncertainty of input data points as well as difference between the stage two estimate and the ensemble mixed-effects linear regression created in step one to estimate model uncertainty. We obtained 1000 samples from the final Gaussian process distributions for every location, age, sex, and year, from which we calculated 95% uncertainty intervals as the 2.5th and 97.5th percentiles of these sample distributions. In countries that are modeled subnationally, national-level estimates may reflect either sums of estimates from subnational locations (a process called aggregation), or subnational estimates may reflect the proportionally split national-level estimate (a process called raking). This decision is

based on availability of subnational data, concordance of subnational and national-level data, and levels of uncertainty in subnational and national-level data. In cases with more high-quality subnational-level data, aggregation is preferred. Raking allows for national-level estimates to have a larger influence on subnational estimates. Table S7 shows whether a country was raked or aggregated if that country is modeled subnationally. Raking and aggregating decisions were consistent across stunting, wasting, and underweight.

### ***Variance modeling***

The third modeling step is an optimization process that grounds the distribution at the mean Z-score estimate modeled from ST-GPR and calculates the variance value that minimizes the predictive error on ST-GPR estimates of severe (Z-score < -3SD) and overall (Z-score < -2SD) CGF prevalence. The form of this distribution does not change in this optimization process, as the distribution maintains the characteristic shape determined by the weight optimization in modeling step 1. In this way, the spread of the characteristic curve shape for stunting, wasting, and underweight is optimized to best align with ST-GPR estimates of key portions of the distribution. Using the “method of moments” equation for each component of the ensemble distribution, a probability density function is calculated for each age, sex, year, and location.

### ***Integration***

The probability density functions produced from variance modeling are integrated to determine the prevalence of overall CGF (Z-score < -2SD), mild CGF (-2SD < Z-score < -1SD), moderate CGF (-3SD < Z-score < -2SD), severe CGF (Z-score < -3SD), and extreme CGF (Z-score < -4SD). The categorical exposures to mild, moderate, and severe CGF are used for subsequent risk analysis in GBD.

### ***Relative change over time***

The relative change in CGF prevalence from 1990 to 2020 was calculated for overall, severe, and extreme stunting, wasting, and underweight. To accomplish this, we started with 1,000 draws of each age-sex specific CGF prevalence from our models. We then calculated the relative change of each draw to the corresponding draw of the same demographic in 1990. These age-sex specific, draw-level relative change values were then aggregated up to relative change values for children of both sex, under age 5 using age-sex specific GBD population estimates.

While other estimates in this report reflect the mean of 1,000 draw-level estimates with a 95% uncertainty interval, relative change calculations reflect the median with a 95% uncertainty interval. This decision was made because locations with low CGF prevalences had some draws of prevalence that approached or were equal to zero, leading to unrealistically high values for relative change over time when these draws were used in percent change calculations. These draws led to skewed distributions for estimates of relative change, in which the mean was often not representative of the overall distribution of draw values. The median was chosen to better represent the most commonly estimated values of relative change in CGF prevalence. The results are shown in Fig. 3 at the global level, the super-region level, and the location level for locations CGF prevalences greater than 1 per million and populations greater than 300,000. Results are more clearly shown by super region in fig. S5 which shows separate plots for each super region. (Notably this does not include extreme wasting in the high-income super region because the prevalence of extreme wasting was estimated to be lower than 1 per million).

To make statements about how much larger severe and extreme CGF improvements have been in comparison to overall CGF improvements, we began with 1,000 draws of severe/extreme CGF relative change since 1990 in 2020. We then divided these values by the corresponding 1,000 draws of the relative change in overall CGF since 1990 in 2020. The mean, 2.5<sup>th</sup> percentile, and 97.5<sup>th</sup> percentile of these ratio draws were used to reflect the relative magnitude of severe and extreme CGF in comparison to overall CGF.

### **Epidemiological transition analysis**

To investigate relationships between CGF prevalences and health systems, MR-BRT (meta-regression—Bayesian, regularized, trimmed) splines were fit on universal health coverage index (UHC index). The UHC index reflects a population's access to quality health care by incorporating intervention coverage and outcome-based measures, and is ultimately transformed to a 0-100 scale (8). Populations with higher UHC index have increased access to quality health care. Splines fit on UHC index for overall (Z-score < -2SD) CGF, severe (Z-score < -3SD), and extreme (Z-score < -4SD) CGF reflect the expected values of those severities of CGF based on UHC index.

Quadratic splines were fit in logit space to standard GBD locations, weighting each location evenly by setting the standard errors equal to 1 for all locations in logit space. Standard GBD locations refer to all 204 countries and territories plus subnational locations for India, China, the United States, and Brazil. Six knots were set in the model using an ensemble knot placement method, which places one knot at the lowest UHC index value observed from 1990 to 2020, one knot at the highest UHC index value observed from 1990 to 2020, and four knots spaced between these knots. Twenty combinations of knot placements were utilized for each model fit, with each weighted according to its predictive power after running for a maximum of 30 iterations. Figure S6 shows the knot placements and weight given to each sub-model. Models were fit with decreasing monotonicity prior, meaning that the models were forced to show decreasing CGF prevalence as UHC index improved. The lowest and highest 0.5% of input estimates relative to the spline were trimmed from the models. Splines were fit in an age- and sex-specific manner (males and females; 0-6 days, 7-27 days, 1-5 months, 6-11 months, 12-23 months, 2-4 years), and later a weighted aggregate for both sexes and all children under 5 was calculated using GBD population estimates. Age- and sex-specific splines for overall, severe, and extreme stunting, wasting, and underweight can be seen in both logit space and normal space in fig. S6.

Expected values of CGF prevalence for children under age 5, both sexes are shown at the region level in Fig. 4. Results for individual countries and territories can be seen in fig. S10.

Splines were scaled to aid in interpretation of improvement trajectories across severities. To accomplish this, a ratio of the splines for different severities was calculated at the spline value that corresponded to the lowest UHC index value. In this way, scaled splines were all anchored to the same starting point at the lowest UHC index value. The spline values for all other values of UHC index were then multiplied by this ratio to calculate the scaled splines. Severe (Z-score < -3SD) CGF and extreme (Z-score < -4SD) CGF splines were scaled to overall (Z-score < -

2SD) CGF splines. These scaled splines can be viewed in Fig. 5 showing the expected trajectory of CGF prevalence improvement by severity as UHC index improves.

Additional MR-BRT models were run using identical specifications except for the addition of a linear covariate of Socio-demographic index (SDI). This covariate was included to highlight the interconnectedness of factors such as UHC index and SDI. Expected values of CGF prevalence for a given location with SDI values of 20, 40, 60, and 80 are shown in fig. S11, analogous to fig. S6, which did not include the linear covariate of SDI. These splines were scaled in the same manner as previously described to assess trajectories across severities. Fig. S12 shows the relative trajectories of expected progress as UHC index improves for a given location with SDI values of 20, 40, 60, and 80.

### **Annual changes and UHC index**

All location-years from 1991 to 2019 were included in a secondary analysis assessing the relationship between annual UHC index changes and relative annual CGF prevalence changes. In this analysis, 1990 was not included because there were no 1989 reference estimates that could be used to calculate annual percentage changes. Additionally, 2020 was not included in this analysis because the effects of the COVID-19 pandemic on UHC index remain less certain at this time than UHC index estimates for previous years. Limited data availability and ongoing volatility in the pandemic led 2020 to be excluded. This analysis instead focuses on the historical relationship between UHC index and annual changes in CGF prevalence.

Location-years were grouped by whether UHC increased or decreased in comparison to the previous year. Relative percentage changes in mild ( $Z$ -score  $< -1SD$ ), overall ( $Z$ -score  $< -2SD$ ), severe ( $Z$ -score  $< -3SD$ ), and extreme ( $Z$ -score  $< -4SD$ ) CGF were calculated using the same methodology as in Fig 3, except in this case the reference year was the prior year instead of 1990. Only location-years with CGF prevalences greater than 1 per million were included to minimize the influence of locations with the lowest absolute CGF prevalence, in which miniscule prevalence changes could be overwhelming in relative space. Similarly, location-years with populations lower than 300,000 were excluded from this analysis.

After creating density plots showing the spread of CGF annual relative change for location-years in which UHC increased and decreased, the Kolmogorov-Smirnov (KS) test statistic was calculated to assess differences in the curves using the `ks.test` function in the stats package of R.

**Table S1. Guidelines for Accurate and Transparent Health Estimates Reporting (GATHER) checklist.**

| #                                                                                                         | GATHER checklist item                                                                                                                                                                                                                                                                                                                                                                   | Description of compliance                                                                                                                                                                         | Reference                                                                                                                                            |
|-----------------------------------------------------------------------------------------------------------|-----------------------------------------------------------------------------------------------------------------------------------------------------------------------------------------------------------------------------------------------------------------------------------------------------------------------------------------------------------------------------------------|---------------------------------------------------------------------------------------------------------------------------------------------------------------------------------------------------|------------------------------------------------------------------------------------------------------------------------------------------------------|
| <b>Objectives and funding</b>                                                                             |                                                                                                                                                                                                                                                                                                                                                                                         |                                                                                                                                                                                                   |                                                                                                                                                      |
| 1                                                                                                         | Define the indicator(s), populations (including age, sex, and geographic entities), and time period(s) for which estimates were made.                                                                                                                                                                                                                                                   | Description of indicators, definitions, relevant time periods, and populations in paper and appendix.                                                                                             | Main manuscript, Abstract and Main text sections; and Supplementary Materials, Methods – Additional Detail, Overview and Definitions sections, pp. 2 |
| 2                                                                                                         | List the funding sources for the work.                                                                                                                                                                                                                                                                                                                                                  | Funding sources listed in paper.                                                                                                                                                                  | Main manuscript, Funding section                                                                                                                     |
| <b>Data inputs</b>                                                                                        |                                                                                                                                                                                                                                                                                                                                                                                         |                                                                                                                                                                                                   |                                                                                                                                                      |
| <i>For all data inputs from multiple sources that are synthesized as part of the study:</i>               |                                                                                                                                                                                                                                                                                                                                                                                         |                                                                                                                                                                                                   |                                                                                                                                                      |
| 3                                                                                                         | Describe how the data were identified and how the data were accessed.                                                                                                                                                                                                                                                                                                                   | Narrative description of data seeking methodology provided.                                                                                                                                       | Supplementary Materials, Methods – Additional Detail, Input data section, pp. 2                                                                      |
| 4                                                                                                         | Specify the inclusion and exclusion criteria. Identify all ad-hoc exclusions.                                                                                                                                                                                                                                                                                                           | Narrative about inclusion and exclusion criteria by data type provided in linked materials.                                                                                                       | Supplementary Materials, Methods – Additional Detail, Data Processing section, pp. 3                                                                 |
| 5                                                                                                         | Provide information on all included data sources and their main characteristics. For each data source used, report reference information or contact name/institution, population represented, data collection method, year(s) of data collection, sex and age range, diagnostic criteria or measurement method, and sample size, as relevant.                                           | An interactive, online data source tool that provides metadata for data sources by component, geography, cause, risk, or impairment.                                                              | Main manuscript, and Supplementary Materials, Table S4                                                                                               |
| 6                                                                                                         | Identify and describe any categories of input data that have potentially important biases (e.g., based on characteristics listed in item 5).                                                                                                                                                                                                                                            | Summary of known biases included in paper                                                                                                                                                         | Supplementary Materials, Methods – Additional Detail, Data Processing section, pp. 3                                                                 |
| <i>For all data inputs that contribute to the analysis but were not synthesized as part of the study:</i> |                                                                                                                                                                                                                                                                                                                                                                                         |                                                                                                                                                                                                   |                                                                                                                                                      |
| 7                                                                                                         | Describe and give sources for any other data inputs.                                                                                                                                                                                                                                                                                                                                    | An interactive, online data source tool that provides metadata for data sources by component, geography, cause, risk, or impairment.                                                              | Supplementary Materials, Methods – Additional Detail, Data Processing section, pp. 3                                                                 |
| <i>For all data inputs:</i>                                                                               |                                                                                                                                                                                                                                                                                                                                                                                         |                                                                                                                                                                                                   |                                                                                                                                                      |
| 8                                                                                                         | Provide all data inputs in a file format from which data can be efficiently extracted (e.g., a spreadsheet as opposed to a PDF), including all relevant meta-data listed in item 5. For any data inputs that cannot be shared due to ethical or legal reasons, such as third-party ownership, provide a contact name or the name of the institution that retains the right to the data. | Downloads of input data are available through online tools, including data visualization tools and data query tools. Input data is not available in tools but can be made available upon request. | Manuscript main text, and Supplementary Materials, Table S4                                                                                          |
| <b>Data analysis</b>                                                                                      |                                                                                                                                                                                                                                                                                                                                                                                         |                                                                                                                                                                                                   |                                                                                                                                                      |
| 9                                                                                                         | Provide a conceptual overview of the data analysis method. A diagram may be helpful.                                                                                                                                                                                                                                                                                                    | Flow diagrams of the overall methodological processes, as well as cause-specific modelling processes have been provided.                                                                          | Supplementary Materials, Methods – Additional Detail, Data processing and Modeling sections, pp. 3-5                                                 |
| 10                                                                                                        | Provide a detailed description of all steps of the analysis, including mathematical formulae. This description should cover, as relevant, data cleaning, data pre-processing, data adjustments and weighting of data sources, and mathematical or statistical model(s).                                                                                                                 | Provided in the methodological write-ups.                                                                                                                                                         | Supplementary Materials, Methods – Additional Detail, Modeling section, pp. 3-5                                                                      |
| 11                                                                                                        | Describe how candidate models were evaluated and how the final model(s) were selected.                                                                                                                                                                                                                                                                                                  | Provided in the methodological write-ups.                                                                                                                                                         | Supplementary Materials, Methods – Additional Detail, pp. 3 and pp. 6                                                                                |



|                               |                                                                                                                                                                  |                                                                                                                                          |                                                                                                                        |
|-------------------------------|------------------------------------------------------------------------------------------------------------------------------------------------------------------|------------------------------------------------------------------------------------------------------------------------------------------|------------------------------------------------------------------------------------------------------------------------|
| 12                            | Provide the results of an evaluation of model performance, if done, as well as the results of any relevant sensitivity analysis.                                 | Provided in the methodological write-ups.                                                                                                | Supplementary Materials, Data S1, Data S2 and Data S4                                                                  |
| 13                            | Describe methods for calculating uncertainty of the estimates. State which sources of uncertainty were, and were not, accounted for in the uncertainty analysis. | Provided in the methodological write-ups.                                                                                                | Supplementary Materials, Methods – Additional Detail pp. 4                                                             |
| 14                            | State how analytic or statistical source code used to generate estimates can be accessed.                                                                        | Access statement provided.                                                                                                               | Main manuscript, Methods – Additional Detail, Data and materials availability section                                  |
| <b>Results and Discussion</b> |                                                                                                                                                                  |                                                                                                                                          |                                                                                                                        |
| 15                            | Provide published estimates in a file format from which data can be efficiently extracted.                                                                       | GBD 2020 results are available through online data visualization tools, the Global Health Data Exchange, and the online data query tool. | Available pending publication at <a href="http://ghdx.healthdata.org/gbd-2020">http://ghdx.healthdata.org/gbd-2020</a> |
| 16                            | Report a quantitative measure of the uncertainty of the estimates (e.g., uncertainty intervals).                                                                 | Uncertainty intervals are provided with all results.                                                                                     | Main manuscript; and Supplementary Materials, Data S1                                                                  |
| 17                            | Interpret results in light of existing evidence. If updating a previous set of estimates, describe the reasons for changes in estimates.                         |                                                                                                                                          | Main manuscript                                                                                                        |
| 18                            | Discuss limitations of the estimates. Include a discussion of any modelling assumptions or data limitations that affect interpretation of the estimates.         | Discussion of limitations provided in the main text.                                                                                     | Main manuscript, Caveats section                                                                                       |

**Table S2. Categorical terms and Z-score definitions for describing the severity of CGF.**

| Term         | Definition            |
|--------------|-----------------------|
| Overall CGF  | Z-score < -2SD        |
| Mild CGF     | -2SD < Z-score < -1SD |
| Moderate CGF | -3SD < Z-score < -2SD |
| Severe CGF   | Z-score < -3SD        |
| Extreme CGF  | Z-score < -4SD        |

**Table S3. Final counts of input data sources included for stunting, wasting, and underweight estimation.**

| CGF dimension      | Country-years of source data | Countries with sources (out of 204) |
|--------------------|------------------------------|-------------------------------------|
| <b>Stunting</b>    | 1762                         | 160                                 |
| <b>Wasting</b>     | 1782                         | 160                                 |
| <b>Underweight</b> | 1771                         | 159                                 |

**Table S4. Comprehensive list of input data sources used in this CGF analysis.** All data underlying the study are available on the Global Health Data Exchange (GHDx), a catalog of demographic and global health data created and supported by IHME. It includes population census data, surveys, registries, indicators and estimates, administrative health data, and financial data related to health. Each dataset is assigned a record to catalogue general metadata, citation, and information about where to obtain the dataset or access the files. Each data source record is assigned an NID (a unique and persistent identifier) and the full list of NIDs included in this child growth failure analysis is included in this table. To access the GHDx record for each NID, use the following URL: “<https://ghdx.healthdata.org/node/<insert NID here>>”. There are no restrictions on data availability such as an MTA. While the GHDx does not host or distribute most data sources, each record includes a URL to the data provider wherever possible.

| Input data source NIDs (778 total sources; Indexed from <a href="https://ghdx.healthdata.org">https://ghdx.healthdata.org</a> ) |      |       |       |       |       |       |       |       |       |        |        |        |        |        |        |        |
|---------------------------------------------------------------------------------------------------------------------------------|------|-------|-------|-------|-------|-------|-------|-------|-------|--------|--------|--------|--------|--------|--------|--------|
| Row 1                                                                                                                           | 595  | 7401  | 12320 | 19198 | 20103 | 20829 | 23289 | 45283 | 76707 | 129884 | 152720 | 200617 | 233917 | 267785 | 308316 | 409558 |
| Row 2                                                                                                                           | 608  | 7440  | 12399 | 19211 | 20120 | 20841 | 23565 | 45376 | 76708 | 129905 | 152783 | 200636 | 234733 | 270404 | 310085 | 411301 |
| Row 3                                                                                                                           | 627  | 7465  | 12584 | 19274 | 20132 | 20852 | 23786 | 45464 | 76709 | 129913 | 153062 | 200707 | 235215 | 270469 | 311265 | 413663 |
| Row 4                                                                                                                           | 687  | 7540  | 12608 | 19292 | 20145 | 20865 | 25914 | 45549 | 76850 | 130075 | 153643 | 200838 | 235348 | 270470 | 316243 | 413741 |
| Row 5                                                                                                                           | 881  | 7618  | 12732 | 19305 | 20154 | 20875 | 26433 | 45718 | 76878 | 130085 | 153674 | 203654 | 236156 | 270471 | 316438 | 416595 |
| Row 6                                                                                                                           | 1039 | 7629  | 12896 | 19315 | 20167 | 20887 | 26826 | 45852 | 77384 | 130486 | 154897 | 203663 | 236205 | 270627 | 316440 | 417560 |
| Row 7                                                                                                                           | 1089 | 7721  | 12940 | 19324 | 20191 | 20888 | 26842 | 45854 | 77385 | 131467 | 155335 | 203664 | 236266 | 274160 | 316442 | 422512 |
| Row 8                                                                                                                           | 1385 | 7843  | 13064 | 19333 | 20202 | 20896 | 26855 | 45856 | 77388 | 133731 | 156596 | 204667 | 244455 | 274707 | 316444 | 423654 |
| Row 9                                                                                                                           | 1404 | 7919  | 13226 | 19350 | 20212 | 20909 | 26866 | 45989 | 77390 | 133732 | 157021 | 206075 | 244458 | 274952 | 316736 | 424884 |
| Row 10                                                                                                                          | 1855 | 8115  | 13445 | 19359 | 20223 | 20917 | 26919 | 46317 | 77515 | 134371 | 157024 | 209930 | 244463 | 275090 | 322237 | 425072 |
| Row 11                                                                                                                          | 1912 | 8618  | 13465 | 19370 | 20235 | 20926 | 26930 | 46517 | 77516 | 135258 | 157025 | 210182 | 244464 | 275122 | 324470 | 425208 |
| Row 12                                                                                                                          | 1927 | 8777  | 13708 | 19381 | 20252 | 20936 | 26989 | 46563 | 77517 | 135416 | 157026 | 210231 | 244465 | 275123 | 326837 | 426238 |
| Row 13                                                                                                                          | 1970 | 8788  | 13719 | 19391 | 20263 | 20947 | 26998 | 46682 | 77518 | 135720 | 157027 | 210614 | 244467 | 281993 | 327852 | 427778 |
| Row 14                                                                                                                          | 1994 | 8819  | 13973 | 19400 | 20274 | 20954 | 27022 | 46881 | 77521 | 135721 | 157031 | 214640 | 244468 | 283269 | 327857 | 427952 |
| Row 15                                                                                                                          | 2039 | 8932  | 14015 | 19410 | 20283 | 20964 | 27031 | 46924 | 77819 | 135773 | 157050 | 218035 | 244469 | 283272 | 330624 | 427983 |
| Row 16                                                                                                                          | 2063 | 9212  | 14027 | 19421 | 20301 | 20976 | 27044 | 47478 | 79839 | 135825 | 157057 | 218555 | 244471 | 283406 | 331377 | 428683 |
| Row 17                                                                                                                          | 2196 | 9270  | 14063 | 19444 | 20315 | 20993 | 27055 | 47962 | 80626 | 135826 | 157058 | 218563 | 244472 | 283811 | 332558 | 428990 |
| Row 18                                                                                                                          | 2209 | 9310  | 14105 | 19456 | 20322 | 21014 | 27069 | 48332 | 80731 | 136038 | 157061 | 218565 | 244473 | 284177 | 334706 | 428993 |
| Row 19                                                                                                                          | 2223 | 9370  | 14122 | 19472 | 20339 | 21033 | 27234 | 48361 | 81004 | 136055 | 157063 | 218568 | 244480 | 284410 | 334707 | 428995 |
| Row 20                                                                                                                          | 2244 | 9422  | 14340 | 19482 | 20347 | 21068 | 27551 | 49205 | 81005 | 139614 | 157064 | 218581 | 246145 | 285874 | 334709 | 428998 |
| Row 21                                                                                                                          | 3114 | 9439  | 14341 | 19493 | 20361 | 21079 | 27563 | 49502 | 81203 | 140116 | 157066 | 218582 | 246209 | 285880 | 334710 | 429000 |
| Row 22                                                                                                                          | 3150 | 9506  | 18499 | 19511 | 20371 | 21090 | 27590 | 55956 | 81509 | 140118 | 159617 | 218592 | 246246 | 285887 | 334953 | 429463 |
| Row 23                                                                                                                          | 3161 | 9516  | 18519 | 19521 | 20382 | 21102 | 27599 | 55975 | 81748 | 140200 | 159868 | 218593 | 246248 | 286053 | 335994 | 429991 |
| Row 24                                                                                                                          | 3404 | 9989  | 18531 | 19529 | 20394 | 21117 | 27606 | 55992 | 82832 | 141521 | 159873 | 218611 | 246249 | 286131 | 336042 | 431951 |
| Row 25                                                                                                                          | 3455 | 9999  | 18533 | 19539 | 20404 | 21126 | 27630 | 56021 | 90696 | 141572 | 160053 | 218613 | 246250 | 286211 | 336401 | 436764 |
| Row 26                                                                                                                          | 3655 | 10001 | 18834 | 19546 | 20417 | 21139 | 27885 | 56040 | 91324 | 141910 | 160103 | 218619 | 246254 | 286232 | 340363 | 437724 |

|        |      |       |       |       |       |       |       |       |        |        |        |        |        |        |        |        |
|--------|------|-------|-------|-------|-------|-------|-------|-------|--------|--------|--------|--------|--------|--------|--------|--------|
| Row 27 | 3922 | 10023 | 18843 | 19557 | 20428 | 21151 | 30037 | 56063 | 93806  | 141948 | 160576 | 219201 | 248224 | 286277 | 341838 | 437993 |
| Row 28 | 3935 | 10224 | 18854 | 19571 | 20437 | 21163 | 30325 | 56151 | 93807  | 142934 | 160781 | 222494 | 249499 | 286657 | 355051 | 438014 |
| Row 29 | 3970 | 10460 | 18865 | 19579 | 20450 | 21188 | 30368 | 56153 | 93848  | 142935 | 161590 | 222676 | 256541 | 286766 | 374851 |        |
| Row 30 | 4012 | 11214 | 18878 | 19587 | 20462 | 21198 | 30379 | 56241 | 95440  | 146860 | 161662 | 222752 | 257050 | 286772 | 374865 |        |
| Row 31 | 4043 | 11238 | 18902 | 19604 | 20478 | 21206 | 30431 | 56420 | 103973 | 148649 | 162031 | 223566 | 257052 | 286780 | 374889 |        |
| Row 32 | 4075 | 11239 | 18913 | 19614 | 20487 | 21240 | 30963 | 56883 | 104236 | 149821 | 162283 | 224096 | 257841 | 286782 | 374958 |        |
| Row 33 | 4694 | 11240 | 18938 | 19627 | 20499 | 21258 | 30991 | 57999 | 106158 | 149860 | 162317 | 224223 | 260403 | 286783 | 375026 |        |
| Row 34 | 4779 | 11271 | 18950 | 19637 | 20518 | 21274 | 31050 | 58185 | 110300 | 149906 | 163056 | 224233 | 261683 | 286785 | 375074 |        |
| Row 35 | 4808 | 11299 | 18959 | 19647 | 20537 | 21281 | 31142 | 58188 | 111432 | 150382 | 165390 | 224236 | 261873 | 286802 | 375078 |        |
| Row 36 | 4818 | 11300 | 18971 | 19656 | 20552 | 21301 | 31143 | 58419 | 111815 | 150526 | 165498 | 224239 | 261875 | 293979 | 375090 |        |
| Row 37 | 4916 | 11301 | 18979 | 19670 | 20567 | 21311 | 31750 | 58660 | 112222 | 150866 | 165645 | 224240 | 261879 | 293980 | 375093 |        |
| Row 38 | 4926 | 11302 | 18990 | 19683 | 20573 | 21331 | 31831 | 60942 | 112500 | 150870 | 165892 | 224248 | 261880 | 293981 | 375098 |        |
| Row 39 | 5009 | 11551 | 19001 | 19695 | 20584 | 21348 | 32189 | 63993 | 112656 | 151086 | 169975 | 224251 | 261883 | 293982 | 375129 |        |
| Row 40 | 5583 | 11639 | 19016 | 19708 | 20596 | 21365 | 32421 | 65118 | 115896 | 151436 | 174049 | 224848 | 261887 | 294482 | 375362 |        |
| Row 41 | 5827 | 11649 | 19027 | 19720 | 20608 | 21382 | 33019 | 69761 | 120208 | 151724 | 189045 | 224849 | 261889 | 296646 | 375813 |        |
| Row 42 | 6111 | 11774 | 19046 | 19728 | 20626 | 21393 | 33196 | 74393 | 124408 | 151725 | 189048 | 224853 | 262810 | 296715 | 384608 |        |
| Row 43 | 6464 | 11928 | 19064 | 19787 | 20638 | 21409 | 34072 | 74460 | 124467 | 151727 | 189092 | 224854 | 262834 | 296882 | 385708 |        |
| Row 44 | 6935 | 12013 | 19076 | 19950 | 20649 | 21412 | 34085 | 76699 | 125591 | 151729 | 189153 | 224855 | 264583 | 297069 | 387266 |        |
| Row 45 | 7028 | 12101 | 19088 | 19963 | 20711 | 21433 | 35493 | 76700 | 126331 | 151732 | 189463 | 224856 | 264590 | 299307 | 387395 |        |
| Row 46 | 7054 | 12201 | 19133 | 20051 | 20722 | 22125 | 40021 | 76701 | 126909 | 151797 | 191270 | 230882 | 264910 | 303663 | 387410 |        |
| Row 47 | 7222 | 12232 | 19142 | 20060 | 20740 | 22882 | 40028 | 76702 | 126911 | 152424 | 192017 | 231832 | 264956 | 303664 | 393876 |        |
| Row 48 | 7340 | 12243 | 19156 | 20073 | 20749 | 22950 | 44126 | 76703 | 126952 | 152561 | 194011 | 231835 | 264959 | 306329 | 396957 |        |
| Row 49 | 7375 | 12280 | 19167 | 20083 | 20767 | 23017 | 44586 | 76704 | 129770 | 152562 | 194016 | 232534 | 265153 | 307776 | 408484 |        |
| Row 50 | 7387 | 12289 | 19188 | 20092 | 20806 | 23219 | 44645 | 76706 | 129783 | 152563 | 200598 | 232763 | 267343 | 307779 | 409169 |        |

**Table S5. Final stunting, wasting, and underweight ensemble weight sets used in the ST-GPR models.**

|            | Normal | Log-normal | Log-logistic | Exponential | Gamma    | Mirrored gamma | Inverse gamma | Gumbel   | Mirrored Gumbel | Weibull  |
|------------|--------|------------|--------------|-------------|----------|----------------|---------------|----------|-----------------|----------|
| <b>HAZ</b> | 0      | 0.425449   | 0.371227     | 0           | 0        | 0              | 0             | 0        | 0.05795         | 0.145373 |
| <b>WHZ</b> | 0      | 0          | 0.542213     | 0           | 0.048224 | 0              | 0             | 0        | 0               | 0.409563 |
| <b>WAZ</b> | 0      | 0          | 0.195735     | 0           | 0        | 0.087365       | 0.138334      | 0.290187 | 0.288379        | 0        |

**Table S6. List of covariates tested in CGF ensemble mixed-effects linear regression.** Covariates ultimately selected are shown with a star (\*).

| Covariate                            |                                                |
|--------------------------------------|------------------------------------------------|
| Energy unadjusted (kcal)*            | Short gestation for birthweight SEV            |
| Healthcare Access and Quality index* | Low birthweight for gestation SEV              |
| Maternal care and immunization*      | Protein-energy malnutrition mortality rate     |
| Prevalence of severe anemia*         | Mortality rate due to war and terrorism        |
| Socio-demographic index*             | Toilet access                                  |
| Unsafe sanitation SEV*               | GDP per capita base 2010 international dollars |

**Table S7. List of countries modeled subnationally in the GBD, and raking and aggregating decisions for this CGF analysis.** Raking and aggregating decisions were consistent across stunting, wasting, and underweight estimation.

| Country   | Raked or aggregated | Country        | Raked or aggregated |
|-----------|---------------------|----------------|---------------------|
| Brazil    | Aggregated          | New Zealand    | Raked               |
| China     | Aggregated          | Nigeria        | Raked               |
| Ethiopia  | Aggregated          | Norway         | Raked               |
| India     | Aggregated          | Pakistan       | Raked               |
| Indonesia | Aggregated          | Philippines    | Raked               |
| Iran      | Raked               | Poland         | Raked               |
| Italy     | Raked               | Russia         | Raked               |
| Japan     | Aggregated          | South Africa   | Aggregated          |
| Kenya     | Aggregated          | United Kingdom | Raked               |
| Mexico    | Aggregated          | United States  | Raked               |

Table S8a. Estimated overall, severe, and extreme **stunting** prevalence (%) in children under 5 years, both sexes, in 1990, 2000, 2010, and 2020.

| Location                                                | Total                       |                             |                             |                             | Severe                      |                             |                             |                            | Extreme                  |                          |                          |                          |
|---------------------------------------------------------|-----------------------------|-----------------------------|-----------------------------|-----------------------------|-----------------------------|-----------------------------|-----------------------------|----------------------------|--------------------------|--------------------------|--------------------------|--------------------------|
|                                                         | 1990                        | 2000                        | 2010                        | 2020                        | 1990                        | 2000                        | 2010                        | 2020                       | 1990                     | 2000                     | 2010                     | 2020                     |
| <b>Global</b>                                           | 35.68%<br>(35.34% - 36.05%) | 32.88%<br>(32.65% - 33.11%) | 28.70%<br>(28.53% - 28.86%) | 24.12%<br>(23.96% - 24.29%) | 16.43%<br>(16.08% - 16.77%) | 15.95%<br>(15.73% - 16.18%) | 13.21%<br>(13.06% - 13.36%) | 10.08%<br>(9.92% - 10.25%) | 5.59%<br>(5.32% - 5.89%) | 6.06%<br>(5.78% - 6.40%) | 4.60%<br>(4.44% - 4.78%) | 3.09%<br>(2.93% - 3.25%) |
| <b>Central Europe, Eastern Europe, and Central Asia</b> | 19.58%<br>(19.15% - 19.99%) | 18.89%<br>(18.56% - 19.22%) | 14.91%<br>(14.54% - 15.29%) | 12.14%<br>(11.73% - 12.53%) | 6.70%<br>(6.35% - 7.07%)    | 6.53%<br>(6.26% - 6.81%)    | 4.48%<br>(4.24% - 4.74%)    | 3.25%<br>(3.00% - 3.50%)   | 1.54%<br>(1.36% - 1.72%) | 1.50%<br>(1.36% - 1.67%) | 0.82%<br>(0.72% - 0.93%) | 0.50%<br>(0.41% - 0.59%) |
| <b>Central Asia</b>                                     | 25.82%<br>(25.25% - 26.38%) | 26.14%<br>(25.63% - 26.70%) | 19.25%<br>(18.71% - 19.77%) | 13.69%<br>(13.16% - 14.27%) | 9.62%<br>(9.04% - 10.20%)   | 9.80%<br>(9.23% - 10.38%)   | 5.57%<br>(5.14% - 5.99%)    | 3.09%<br>(2.76% - 3.42%)   | 2.36%<br>(1.98% - 2.78%) | 2.36%<br>(2.02% - 2.74%) | 0.84%<br>(0.69% - 1.02%) | 0.27%<br>(0.20% - 0.37%) |
| Armenia                                                 | 17.15%<br>(15.94% - 18.31%) | 18.03%<br>(16.95% - 19.02%) | 15.10%<br>(14.15% - 16.01%) | 11.59%<br>(10.65% - 12.55%) | 4.66%<br>(3.86% - 5.47%)    | 5.13%<br>(4.37% - 5.94%)    | 4.15%<br>(3.60% - 4.76%)    | 2.66%<br>(2.23% - 3.18%)   | 0.60%<br>(0.35% - 0.91%) | 0.74%<br>(0.47% - 1.06%) | 0.55%<br>(0.36% - 0.77%) | 0.21%<br>(0.11% - 0.34%) |
| Azerbaijan                                              | 25.45%<br>(24.27% - 26.63%) | 25.52%<br>(24.70% - 26.36%) | 19.38%<br>(18.66% - 20.12%) | 16.54%<br>(15.44% - 17.57%) | 9.54%<br>(8.30% - 10.83%)   | 9.88%<br>(8.99% - 10.77%)   | 6.63%<br>(5.98% - 7.25%)    | 5.21%<br>(4.42% - 5.95%)   | 2.25%<br>(1.67% - 2.93%) | 2.43%<br>(1.96% - 2.92%) | 1.35%<br>(1.04% - 1.68%) | 0.92%<br>(0.63% - 1.22%) |
| Georgia                                                 | 14.89%<br>(13.65% - 16.13%) | 14.26%<br>(13.33% - 15.24%) | 11.84%<br>(11.03% - 12.71%) | 8.14%<br>(7.38% - 9.05%)    | 3.36%<br>(2.70% - 4.05%)    | 3.36%<br>(2.85% - 3.90%)    | 2.66%<br>(2.25% - 3.11%)    | 1.29%<br>(0.98% - 1.66%)   | 0.26%<br>(0.11% - 0.44%) | 0.28%<br>(0.16% - 0.43%) | 0.17%<br>(0.07% - 0.29%) | 0.01%<br>(0.00% - 0.05%) |
| Kazakhstan                                              | 17.31%<br>(16.25% - 18.33%) | 16.65%<br>(15.74% - 17.62%) | 14.03%<br>(13.34% - 14.84%) | 10.01%<br>(9.21% - 10.88%)  | 4.80%<br>(4.08% - 5.54%)    | 4.42%<br>(3.74% - 5.04%)    | 3.63%<br>(3.20% - 4.12%)    | 2.24%<br>(1.83% - 2.68%)   | 0.67%<br>(0.45% - 0.95%) | 0.57%<br>(0.38% - 0.78%) | 0.43%<br>(0.30% - 0.58%) | 0.14%<br>(0.06% - 0.25%) |
| Kyrgyzstan                                              | 27.11%<br>(25.81% - 28.49%) | 25.70%<br>(24.59% - 26.82%) | 18.80%<br>(17.82% - 19.72%) | 15.70%<br>(14.52% - 16.84%) | 9.89%<br>(8.47% - 11.33%)   | 9.32%<br>(8.18% - 10.45%)   | 5.46%<br>(4.82% - 6.22%)    | 4.03%<br>(3.23% - 4.86%)   | 2.25%<br>(1.52% - 3.04%) | 2.11%<br>(1.56% - 2.71%) | 0.83%<br>(0.59% - 1.14%) | 0.47%<br>(0.22% - 0.77%) |
| Mongolia                                                | 31.02%<br>(29.34% - 32.97%) | 30.08%<br>(29.02% - 31.49%) | 17.92%<br>(16.95% - 18.89%) | 12.63%<br>(11.66% - 13.67%) | 8.94%<br>(7.13% - 10.62%)   | 9.82%<br>(8.62% - 10.98%)   | 4.17%<br>(3.47% - 4.87%)    | 2.22%<br>(1.66% - 2.84%)   | 1.25%<br>(0.66% - 2.03%) | 1.75%<br>(1.20% - 2.39%) | 0.39%<br>(0.20% - 0.62%) | 0.07%<br>(0.01% - 0.20%) |
| Tajikistan                                              | 34.17%<br>(32.81% - 35.57%) | 35.85%<br>(34.82% - 36.87%) | 30.41%<br>(29.23% - 31.68%) | 22.96%<br>(21.53% - 24.39%) | 12.78%<br>(11.12% - 14.43%) | 14.14%<br>(12.88% - 15.41%) | 10.22%<br>(8.96% - 11.49%)  | 6.39%<br>(5.17% - 7.70%)   | 2.95%<br>(2.15% - 3.91%) | 3.53%<br>(2.84% - 4.24%) | 1.96%<br>(1.39% - 2.61%) | 0.89%<br>(0.48% - 1.41%) |
| Turkmenistan                                            | 24.67%<br>(23.28% - 26.03%) | 24.13%<br>(23.36% - 25.00%) | 16.14%<br>(15.37% - 16.86%) | 11.25%<br>(10.41% - 12.08%) | 7.09%<br>(5.83% - 8.28%)    | 7.51%<br>(6.75% - 8.34%)    | 3.90%<br>(3.40% - 4.41%)    | 2.12%<br>(1.72% - 2.55%)   | 1.17%<br>(0.79% - 1.59%) | 1.39%<br>(1.12% - 1.72%) | 0.39%<br>(0.25% - 0.55%) | 0.07%<br>(0.02% - 0.16%) |
| Uzbekistan                                              | 30.26%<br>(28.89% - 31.60%) | 28.32%<br>(27.24% - 29.59%) | 19.67%<br>(18.57% - 20.78%) | 12.75%<br>(11.60% - 13.97%) | 13.31%<br>(11.87% - 14.78%) | 11.61%<br>(10.47% - 12.85%) | 5.52%<br>(4.54% - 6.46%)    | 2.36%<br>(1.77% - 3.05%)   | 3.99%<br>(3.06% - 5.08%) | 3.12%<br>(2.41% - 3.94%) | 0.77%<br>(0.44% - 1.14%) | 0.08%<br>(0.00% - 0.24%) |
| <b>Central Europe</b>                                   | 13.07%<br>(12.64% - 13.52%) | 12.59%<br>(12.21% - 12.98%) | 9.79%<br>(9.45% - 10.13%)   | 8.65%<br>(8.32% - 9.01%)    | 3.49%<br>(3.25% - 3.78%)    | 3.62%<br>(3.40% - 3.83%)    | 2.45%<br>(2.27% - 2.63%)    | 1.97%<br>(1.81% - 2.15%)   | 0.59%<br>(0.49% - 0.69%) | 0.68%<br>(0.60% - 0.77%) | 0.31%<br>(0.25% - 0.37%) | 0.19%<br>(0.14% - 0.25%) |
| Albania                                                 | 37.89%<br>(36.48% - 39.38%) | 35.27%<br>(34.14% - 36.48%) | 23.87%<br>(22.81% - 24.91%) | 18.26%<br>(17.11% - 19.47%) | 19.47%<br>(17.71% - 21.46%) | 18.71%<br>(17.36% - 20.21%) | 10.32%<br>(9.39% - 11.26%)  | 6.34%<br>(5.52% - 7.23%)   | 7.26%<br>(5.83% - 8.99%) | 7.42%<br>(6.27% - 8.72%) | 3.17%<br>(2.66% - 3.73%) | 1.37%<br>(1.05% - 1.76%) |
| Bosnia and Herzegovina                                  | 15.71%<br>(14.60% - 16.84%) | 12.52%<br>(11.66% - 13.37%) | 9.69%<br>(9.02% - 10.41%)   | 9.13%<br>(8.38% - 9.94%)    | 4.35%<br>(3.65% - 5.04%)    | 3.41%<br>(2.98% - 3.93%)    | 2.37%<br>(2.05% - 2.69%)    | 2.13%<br>(1.81% - 2.49%)   | 0.61%<br>(0.39% - 0.85%) | 0.44%<br>(0.30% - 0.62%) | 0.23%<br>(0.16% - 0.32%) | 0.19%<br>(0.13% - 0.28%) |
| Bulgaria                                                | 11.82%<br>(10.84% - 12.92%) | 13.51%<br>(12.54% - 14.64%) | 11.50%<br>(10.60% - 12.46%) | 10.31%<br>(9.40% - 11.26%)  | 3.12%<br>(2.56% - 3.76%)    | 4.04%<br>(3.43% - 4.76%)    | 3.20%<br>(2.72% - 3.74%)    | 2.73%<br>(2.26% - 3.24%)   | 0.35%<br>(0.19% - 0.57%) | 0.64%<br>(0.43% - 0.92%) | 0.42%<br>(0.27% - 0.61%) | 0.30%<br>(0.17% - 0.47%) |
| Croatia                                                 | 11.96%<br>(10.89% - 12.99%) | 12.22%<br>(11.17% - 13.27%) | 9.60%<br>(8.74% - 10.47%)   | 8.90%<br>(8.16% - 9.71%)    | 2.82%<br>(2.23% - 3.41%)    | 3.18%<br>(2.61% - 3.75%)    | 2.33%<br>(1.91% - 2.76%)    | 2.03%<br>(1.69% - 2.44%)   | 0.23%<br>(0.09% - 0.41%) | 0.36%<br>(0.20% - 0.56%) | 0.19%<br>(0.09% - 0.32%) | 0.13%<br>(0.06% - 0.23%) |
| Czechia                                                 | 3.16%<br>(2.87% - 3.48%)    | 2.68%<br>(2.41% - 2.98%)    | 2.52%<br>(2.26% - 2.78%)    | 2.46%<br>(2.21% - 2.71%)    | 0.13%<br>(0.09% - 0.19%)    | 0.13%<br>(0.09% - 0.18%)    | 0.13%<br>(0.09% - 0.19%)    | 0.13%<br>(0.09% - 0.18%)   | 0.00%<br>(0.00% - 0.00%) | 0.00%<br>(0.00% - 0.00%) | 0.00%<br>(0.00% - 0.00%) | 0.00%<br>(0.00% - 0.00%) |
| Hungary                                                 | 4.02%<br>(3.36% - 4.67%)    | 4.12%<br>(3.53% - 4.72%)    | 4.31%<br>(3.82% - 4.84%)    | 4.23%<br>(3.76% - 4.72%)    | 0.12%<br>(0.03% - 0.25%)    | 0.21%<br>(0.09% - 0.36%)    | 0.35%<br>(0.21% - 0.51%)    | 0.34%<br>(0.21% - 0.49%)   | 0.00%<br>(0.00% - 0.00%) | 0.00%<br>(0.00% - 0.00%) | 0.00%<br>(0.00% - 0.00%) | 0.00%<br>(0.00% - 0.00%) |
| North Macedonia                                         | 11.43%<br>(10.45% - 12.46%) | 10.46%<br>(9.60% - 11.37%)  | 8.26%<br>(7.60% - 8.93%)    | 7.46%<br>(6.82% - 8.15%)    | 2.20%<br>(1.71% - 2.67%)    | 2.16%<br>(1.75% - 2.61%)    | 1.58%<br>(1.31% - 1.87%)    | 1.33%<br>(1.08% - 1.61%)   | 0.11%<br>(0.03% - 0.24%) | 0.13%<br>(0.05% - 0.25%) | 0.05%<br>(0.01% - 0.11%) | 0.02%<br>(0.00% - 0.06%) |
| Montenegro                                              | 6.56%<br>(5.96% - 7.21%)    | 7.91%<br>(7.22% - 8.66%)    | 9.07%<br>(8.37% - 9.80%)    | 9.74%<br>(8.93% - 10.64%)   | 0.76%<br>(0.57% - 0.98%)    | 1.15%<br>(0.89% - 1.43%)    | 1.68%<br>(1.36% - 2.00%)    | 1.87%<br>(1.51% - 2.29%)   | 0.00%<br>(0.00% - 0.00%) | 0.01%<br>(0.00% - 0.03%) | 0.04%<br>(0.01% - 0.10%) | 0.09%<br>(0.03% - 0.17%) |
| Poland                                                  | 12.54%<br>(11.49% - 13.64%) | 11.48%<br>(10.52% - 12.52%) | 9.26%<br>(8.43% - 10.12%)   | 8.26%<br>(7.50% - 9.06%)    | 2.63%<br>(2.04% - 3.28%)    | 2.70%<br>(2.16% - 3.26%)    | 2.07%<br>(1.71% - 2.46%)    | 1.70%<br>(1.40% - 2.07%)   | 0.17%<br>(0.06% - 0.34%) | 0.24%<br>(0.12% - 0.40%) | 0.14%<br>(0.07% - 0.24%) | 0.08%<br>(0.04% - 0.15%) |

Table S8a. Estimated overall, severe, and extreme **stunting** prevalence (%) in children under 5 years, both sexes, in 1990, 2000, 2010, and 2020.

| Location                        | Total                       |                             |                             |                             | Severe                      |                             |                            |                            | Extreme                  |                          |                          |                          |
|---------------------------------|-----------------------------|-----------------------------|-----------------------------|-----------------------------|-----------------------------|-----------------------------|----------------------------|----------------------------|--------------------------|--------------------------|--------------------------|--------------------------|
|                                 | 1990                        | 2000                        | 2010                        | 2020                        | 1990                        | 2000                        | 2010                       | 2020                       | 1990                     | 2000                     | 2010                     | 2020                     |
| Romania                         | 16.63%<br>(15.64% - 17.62%) | 17.74%<br>(17.06% - 18.50%) | 14.69%<br>(13.65% - 15.77%) | 13.13%<br>(12.00% - 14.28%) | 4.69%<br>(4.04% - 5.37%)    | 5.32%<br>(4.80% - 5.85%)    | 4.13%<br>(3.48% - 4.80%)   | 3.58%<br>(2.89% - 4.29%)   | 0.67%<br>(0.46% - 0.93%) | 0.91%<br>(0.68% - 1.17%) | 0.62%<br>(0.38% - 0.90%) | 0.50%<br>(0.26% - 0.80%) |
| Serbia                          | 11.02%<br>(10.13% - 11.95%) | 10.48%<br>(9.68% - 11.31%)  | 9.19%<br>(8.59% - 9.89%)    | 7.97%<br>(7.29% - 8.67%)    | 2.20%<br>(1.80% - 2.64%)    | 2.23%<br>(1.88% - 2.64%)    | 2.05%<br>(1.76% - 2.38%)   | 1.66%<br>(1.37% - 2.01%)   | 0.09%<br>(0.03% - 0.19%) | 0.11%<br>(0.05% - 0.21%) | 0.12%<br>(0.06% - 0.20%) | 0.07%<br>(0.03% - 0.13%) |
| Slovakia                        | 12.38%<br>(11.25% - 13.51%) | 12.29%<br>(11.22% - 13.41%) | 10.27%<br>(9.44% - 11.21%)  | 9.35%<br>(8.48% - 10.22%)   | 2.81%<br>(2.21% - 3.43%)    | 3.12%<br>(2.55% - 3.77%)    | 2.49%<br>(2.08% - 2.98%)   | 2.09%<br>(1.71% - 2.50%)   | 0.21%<br>(0.07% - 0.40%) | 0.33%<br>(0.17% - 0.54%) | 0.21%<br>(0.12% - 0.34%) | 0.13%<br>(0.06% - 0.24%) |
| Slovenia                        | 10.85%<br>(9.79% - 11.87%)  | 10.70%<br>(9.77% - 11.73%)  | 8.54%<br>(7.80% - 9.33%)    | 7.94%<br>(7.20% - 8.66%)    | 2.49%<br>(1.99% - 3.04%)    | 2.68%<br>(2.21% - 3.23%)    | 2.06%<br>(1.72% - 2.44%)   | 1.81%<br>(1.47% - 2.14%)   | 0.18%<br>(0.06% - 0.33%) | 0.26%<br>(0.13% - 0.43%) | 0.16%<br>(0.08% - 0.26%) | 0.10%<br>(0.05% - 0.19%) |
| <b>Eastern Europe</b>           | 19.51%<br>(18.74% - 20.28%) | 16.94%<br>(16.32% - 17.56%) | 14.25%<br>(13.49% - 14.96%) | 12.50%<br>(11.71% - 13.30%) | 6.77%<br>(6.15% - 7.40%)    | 5.70%<br>(5.25% - 6.15%)    | 4.70%<br>(4.23% - 5.19%)   | 3.99%<br>(3.53% - 4.45%)   | 1.57%<br>(1.29% - 1.88%) | 1.32%<br>(1.11% - 1.54%) | 1.06%<br>(0.86% - 1.28%) | 0.83%<br>(0.65% - 1.03%) |
| Belarus                         | 5.29%<br>(4.79% - 5.82%)    | 5.02%<br>(4.53% - 5.51%)    | 4.37%<br>(3.98% - 4.81%)    | 3.74%<br>(3.37% - 4.17%)    | 0.48%<br>(0.36% - 0.63%)    | 0.50%<br>(0.37% - 0.64%)    | 0.45%<br>(0.34% - 0.57%)   | 0.38%<br>(0.28% - 0.48%)   | 0.00%<br>(0.00% - 0.02%) | 0.01%<br>(0.00% - 0.02%) | 0.00%<br>(0.00% - 0.02%) | 0.00%<br>(0.00% - 0.01%) |
| Estonia                         | 15.38%<br>(14.12% - 16.64%) | 11.53%<br>(10.46% - 12.59%) | 7.20%<br>(6.52% - 7.96%)    | 6.37%<br>(5.72% - 7.09%)    | 4.19%<br>(3.38% - 5.05%)    | 2.84%<br>(2.29% - 3.49%)    | 1.41%<br>(1.08% - 1.76%)   | 1.18%<br>(0.91% - 1.50%)   | 0.54%<br>(0.28% - 0.86%) | 0.26%<br>(0.11% - 0.47%) | 0.04%<br>(0.00% - 0.12%) | 0.02%<br>(0.00% - 0.08%) |
| Latvia                          | 15.38%<br>(14.17% - 16.70%) | 12.70%<br>(11.64% - 13.79%) | 8.42%<br>(7.58% - 9.42%)    | 7.06%<br>(6.33% - 7.80%)    | 4.12%<br>(3.32% - 5.02%)    | 3.19%<br>(2.56% - 3.84%)    | 1.63%<br>(1.27% - 2.10%)   | 1.27%<br>(0.96% - 1.65%)   | 0.52%<br>(0.26% - 0.85%) | 0.32%<br>(0.14% - 0.54%) | 0.04%<br>(0.00% - 0.15%) | 0.02%<br>(0.00% - 0.09%) |
| Lithuania                       | 14.32%<br>(13.21% - 15.54%) | 11.17%<br>(10.09% - 12.23%) | 7.48%<br>(6.80% - 8.22%)    | 6.45%<br>(5.84% - 7.20%)    | 3.75%<br>(3.02% - 4.52%)    | 2.70%<br>(2.15% - 3.29%)    | 1.37%<br>(1.07% - 1.73%)   | 1.12%<br>(0.86% - 1.44%)   | 0.44%<br>(0.21% - 0.70%) | 0.23%<br>(0.08% - 0.42%) | 0.02%<br>(0.00% - 0.09%) | 0.01%<br>(0.00% - 0.07%) |
| Republic of Moldova             | 10.59%<br>(9.59% - 11.63%)  | 10.49%<br>(9.62% - 11.40%)  | 8.23%<br>(7.58% - 8.91%)    | 6.44%<br>(5.86% - 7.12%)    | 1.85%<br>(1.43% - 2.31%)    | 1.95%<br>(1.59% - 2.37%)    | 1.25%<br>(1.01% - 1.54%)   | 0.91%<br>(0.70% - 1.16%)   | 0.03%<br>(0.00% - 0.10%) | 0.05%<br>(0.01% - 0.12%) | 0.00%<br>(0.00% - 0.02%) | 0.00%<br>(0.00% - 0.00%) |
| Russian Federation              | 19.16%<br>(18.07% - 20.23%) | 15.45%<br>(14.59% - 16.35%) | 12.36%<br>(11.39% - 13.35%) | 11.08%<br>(10.06% - 12.13%) | 5.93%<br>(5.06% - 6.84%)    | 4.28%<br>(3.67% - 4.89%)    | 3.30%<br>(2.73% - 3.87%)   | 2.99%<br>(2.41% - 3.58%)   | 1.03%<br>(0.70% - 1.40%) | 0.59%<br>(0.39% - 0.82%) | 0.41%<br>(0.24% - 0.61%) | 0.37%<br>(0.19% - 0.59%) |
| Ukraine                         | 25.39%<br>(24.12% - 26.67%) | 25.61%<br>(24.52% - 26.64%) | 24.13%<br>(22.87% - 25.36%) | 22.97%<br>(21.53% - 24.30%) | 11.73%<br>(10.40% - 13.00%) | 12.02%<br>(10.97% - 13.06%) | 11.08%<br>(9.92% - 12.23%) | 10.38%<br>(9.17% - 11.62%) | 3.95%<br>(3.12% - 4.82%) | 4.14%<br>(3.41% - 4.87%) | 3.71%<br>(3.01% - 4.51%) | 3.41%<br>(2.67% - 4.22%) |
| <b>High-income</b>              | 4.12%<br>(3.99% - 4.25%)    | 3.57%<br>(3.46% - 3.68%)    | 3.03%<br>(2.94% - 3.13%)    | 2.79%<br>(2.69% - 2.90%)    | 0.29%<br>(0.26% - 0.33%)    | 0.28%<br>(0.26% - 0.31%)    | 0.22%<br>(0.19% - 0.24%)   | 0.20%<br>(0.17% - 0.22%)   | 0.01%<br>(0.01% - 0.01%) | 0.01%<br>(0.00% - 0.01%) | 0.00%<br>(0.00% - 0.00%) | 0.00%<br>(0.00% - 0.00%) |
| <b>Australasia</b>              | 2.35%<br>(2.15% - 2.58%)    | 2.09%<br>(1.90% - 2.32%)    | 1.91%<br>(1.74% - 2.10%)    | 1.79%<br>(1.63% - 1.97%)    | 0.04%<br>(0.03% - 0.06%)    | 0.03%<br>(0.02% - 0.04%)    | 0.01%<br>(0.01% - 0.02%)   | 0.01%<br>(0.01% - 0.02%)   | 0.00%<br>(0.00% - 0.00%) | 0.00%<br>(0.00% - 0.00%) | 0.00%<br>(0.00% - 0.00%) | 0.00%<br>(0.00% - 0.00%) |
| Australia                       | 2.12%<br>(1.90% - 2.40%)    | 1.95%<br>(1.72% - 2.20%)    | 1.81%<br>(1.60% - 2.04%)    | 1.70%<br>(1.52% - 1.91%)    | 0.01%<br>(0.00% - 0.02%)    | 0.00%<br>(0.00% - 0.01%)    | 0.00%<br>(0.00% - 0.01%)   | 0.00%<br>(0.00% - 0.01%)   | 0.00%<br>(0.00% - 0.00%) | 0.00%<br>(0.00% - 0.00%) | 0.00%<br>(0.00% - 0.00%) | 0.00%<br>(0.00% - 0.00%) |
| New Zealand                     | 3.34%<br>(3.01% - 3.67%)    | 2.74%<br>(2.47% - 3.03%)    | 2.42%<br>(2.20% - 2.70%)    | 2.22%<br>(2.01% - 2.45%)    | 0.21%<br>(0.16% - 0.26%)    | 0.12%<br>(0.08% - 0.16%)    | 0.07%<br>(0.04% - 0.09%)   | 0.06%<br>(0.04% - 0.09%)   | 0.00%<br>(0.00% - 0.00%) | 0.00%<br>(0.00% - 0.00%) | 0.00%<br>(0.00% - 0.00%) | 0.00%<br>(0.00% - 0.00%) |
| <b>High-income Asia Pacific</b> | 7.30%<br>(7.13% - 7.48%)    | 6.44%<br>(6.30% - 6.58%)    | 6.41%<br>(6.33% - 6.49%)    | 5.99%<br>(5.88% - 6.11%)    | 0.54%<br>(0.50% - 0.58%)    | 0.57%<br>(0.54% - 0.60%)    | 0.62%<br>(0.61% - 0.67%)   | 0.62%<br>(0.59% - 0.66%)   | 0.01%<br>(0.01% - 0.01%) | 0.01%<br>(0.01% - 0.01%) | 0.01%<br>(0.01% - 0.01%) | 0.01%<br>(0.01% - 0.01%) |
| Brunei Darussalam               | 21.63%<br>(20.34% - 22.91%) | 19.56%<br>(18.44% - 20.77%) | 18.34%<br>(17.39% - 19.30%) | 17.51%<br>(16.34% - 18.66%) | 7.40%<br>(6.37% - 8.46%)    | 6.66%<br>(5.86% - 7.61%)    | 6.26%<br>(5.55% - 6.93%)   | 6.01%<br>(5.24% - 6.85%)   | 1.64%<br>(1.22% - 2.11%) | 1.48%<br>(1.14% - 1.91%) | 1.41%<br>(1.10% - 1.75%) | 1.37%<br>(1.05% - 1.75%) |
| Japan                           | 9.43%<br>(9.24% - 9.62%)    | 8.48%<br>(8.33% - 8.63%)    | 8.04%<br>(7.95% - 8.13%)    | 7.67%<br>(7.53% - 7.82%)    | 0.78%<br>(0.73% - 0.84%)    | 0.84%<br>(0.79% - 0.88%)    | 0.88%<br>(0.84% - 0.91%)   | 0.86%<br>(0.81% - 0.91%)   | 0.00%<br>(0.00% - 0.00%) | 0.00%<br>(0.00% - 0.00%) | 0.00%<br>(0.00% - 0.00%) | 0.00%<br>(0.00% - 0.00%) |
| <i>Hokkaidō</i>                 | 9.90%<br>(8.86% - 11.06%)   | 8.81%<br>(8.05% - 9.64%)    | 8.43%<br>(8.20% - 8.67%)    | 8.10%<br>(7.37% - 8.87%)    | 0.76%<br>(0.47% - 1.10%)    | 0.84%<br>(0.60% - 1.13%)    | 0.91%<br>(0.75% - 1.07%)   | 0.91%<br>(0.68% - 1.18%)   | 0.00%<br>(0.00% - 0.01%) | 0.00%<br>(0.00% - 0.01%) | 0.00%<br>(0.00% - 0.00%) | 0.00%<br>(0.00% - 0.01%) |
| <i>Aomori</i>                   | 10.13%<br>(9.10% - 11.21%)  | 9.11%<br>(8.17% - 10.06%)   | 8.50%<br>(7.64% - 9.44%)    | 8.04%<br>(7.23% - 8.87%)    | 1.03%<br>(0.68% - 1.43%)    | 1.09%<br>(0.76% - 1.47%)    | 1.13%<br>(0.84% - 1.48%)   | 1.10%<br>(0.83% - 1.42%)   | 0.00%<br>(0.00% - 0.00%) | 0.00%<br>(0.00% - 0.01%) | 0.00%<br>(0.00% - 0.01%) | 0.00%<br>(0.00% - 0.01%) |
| <i>Iwate</i>                    | 12.57%<br>(11.44% - 13.73%) | 11.30%<br>(10.26% - 12.40%) | 10.79%<br>(9.84% - 11.82%)  | 10.17%<br>(9.27% - 11.21%)  | 1.78%<br>(1.35% - 2.32%)    | 1.84%<br>(1.42% - 2.30%)    | 1.86%<br>(1.48% - 2.31%)   | 1.77%<br>(1.39% - 2.20%)   | 0.03%<br>(0.00% - 0.07%) | 0.04%<br>(0.01% - 0.09%) | 0.04%<br>(0.01% - 0.10%) | 0.04%<br>(0.01% - 0.10%) |

Table S8a. Estimated overall, severe, and extreme **stunting** prevalence (%) in children under 5 years, both sexes, in 1990, 2000, 2010, and 2020.

| Location         | Total                       |                             |                            |                            | Severe                   |                          |                          |                          | Extreme                  |                          |                          |                          |
|------------------|-----------------------------|-----------------------------|----------------------------|----------------------------|--------------------------|--------------------------|--------------------------|--------------------------|--------------------------|--------------------------|--------------------------|--------------------------|
|                  | 1990                        | 2000                        | 2010                       | 2020                       | 1990                     | 2000                     | 2010                     | 2020                     | 1990                     | 2000                     | 2010                     | 2020                     |
| <i>Miyagi</i>    | 9.36%<br>(8.40% - 10.35%)   | 8.44%<br>(7.61% - 9.30%)    | 8.08%<br>(7.26% - 8.82%)   | 7.70%<br>(6.89% - 8.43%)   | 1.13%<br>(0.82% - 1.49%) | 1.14%<br>(0.87% - 1.47%) | 1.18%<br>(0.91% - 1.45%) | 1.12%<br>(0.86% - 1.41%) | 0.00%<br>(0.00% - 0.01%) | 0.00%<br>(0.00% - 0.01%) | 0.00%<br>(0.00% - 0.01%) | 0.00%<br>(0.00% - 0.01%) |
| <i>Akita</i>     | 9.61%<br>(8.71% - 10.60%)   | 8.67%<br>(7.87% - 9.54%)    | 8.33%<br>(7.50% - 9.18%)   | 7.97%<br>(7.23% - 8.82%)   | 1.21%<br>(0.87% - 1.59%) | 1.23%<br>(0.94% - 1.58%) | 1.25%<br>(0.97% - 1.58%) | 1.21%<br>(0.95% - 1.50%) | 0.00%<br>(0.00% - 0.02%) | 0.00%<br>(0.00% - 0.02%) | 0.00%<br>(0.00% - 0.02%) | 0.00%<br>(0.00% - 0.02%) |
| <i>Yamagata</i>  | 9.25%<br>(8.35% - 10.30%)   | 8.57%<br>(7.69% - 9.47%)    | 8.21%<br>(7.37% - 9.08%)   | 7.88%<br>(7.13% - 8.73%)   | 0.75%<br>(0.49% - 1.10%) | 0.84%<br>(0.58% - 1.15%) | 0.91%<br>(0.64% - 1.20%) | 0.89%<br>(0.64% - 1.16%) | 0.00%<br>(0.00% - 0.00%) | 0.00%<br>(0.00% - 0.00%) | 0.00%<br>(0.00% - 0.00%) | 0.00%<br>(0.00% - 0.00%) |
| <i>Fukushima</i> | 6.59%<br>(5.90% - 7.36%)    | 5.90%<br>(5.30% - 6.55%)    | 5.56%<br>(4.97% - 6.14%)   | 5.30%<br>(4.75% - 5.87%)   | 0.17%<br>(0.07% - 0.32%) | 0.22%<br>(0.11% - 0.36%) | 0.26%<br>(0.15% - 0.40%) | 0.27%<br>(0.15% - 0.40%) | 0.00%<br>(0.00% - 0.00%) | 0.00%<br>(0.00% - 0.00%) | 0.00%<br>(0.00% - 0.00%) | 0.00%<br>(0.00% - 0.00%) |
| <i>Ibaraki</i>   | 9.63%<br>(8.61% - 10.80%)   | 8.59%<br>(7.73% - 9.50%)    | 8.13%<br>(7.34% - 8.94%)   | 7.75%<br>(6.96% - 8.58%)   | 0.65%<br>(0.37% - 1.00%) | 0.74%<br>(0.49% - 1.07%) | 0.80%<br>(0.56% - 1.06%) | 0.79%<br>(0.54% - 1.10%) | 0.00%<br>(0.00% - 0.00%) | 0.00%<br>(0.00% - 0.00%) | 0.00%<br>(0.00% - 0.00%) | 0.00%<br>(0.00% - 0.00%) |
| <i>Tochigi</i>   | 10.54%<br>(9.52% - 11.67%)  | 9.41%<br>(8.55% - 10.38%)   | 8.90%<br>(8.00% - 9.89%)   | 8.51%<br>(7.64% - 9.48%)   | 0.68%<br>(0.40% - 1.04%) | 0.80%<br>(0.54% - 1.12%) | 0.87%<br>(0.62% - 1.18%) | 0.88%<br>(0.61% - 1.20%) | 0.00%<br>(0.00% - 0.00%) | 0.00%<br>(0.00% - 0.00%) | 0.00%<br>(0.00% - 0.00%) | 0.00%<br>(0.00% - 0.00%) |
| <i>Gunma</i>     | 12.68%<br>(11.59% - 13.87%) | 11.51%<br>(10.48% - 12.60%) | 11.00%<br>(9.98% - 11.99%) | 10.49%<br>(9.49% - 11.50%) | 1.40%<br>(0.96% - 1.92%) | 1.48%<br>(1.08% - 1.94%) | 1.56%<br>(1.19% - 1.97%) | 1.53%<br>(1.15% - 1.95%) | 0.01%<br>(0.00% - 0.03%) | 0.01%<br>(0.00% - 0.03%) | 0.01%<br>(0.00% - 0.03%) | 0.01%<br>(0.00% - 0.04%) |
| <i>Saitama</i>   | 10.01%<br>(8.98% - 11.10%)  | 9.00%<br>(8.27% - 9.84%)    | 8.58%<br>(8.39% - 8.76%)   | 8.24%<br>(7.56% - 8.98%)   | 0.64%<br>(0.39% - 0.99%) | 0.74%<br>(0.51% - 1.01%) | 0.81%<br>(0.67% - 0.97%) | 0.82%<br>(0.60% - 1.06%) | 0.00%<br>(0.00% - 0.00%) | 0.00%<br>(0.00% - 0.00%) | 0.00%<br>(0.00% - 0.00%) | 0.00%<br>(0.00% - 0.00%) |
| <i>Chiba</i>     | 8.03%<br>(7.23% - 8.89%)    | 7.29%<br>(6.59% - 8.04%)    | 6.96%<br>(6.35% - 7.66%)   | 6.73%<br>(6.04% - 7.41%)   | 0.47%<br>(0.27% - 0.68%) | 0.52%<br>(0.35% - 0.72%) | 0.58%<br>(0.42% - 0.76%) | 0.57%<br>(0.41% - 0.77%) | 0.00%<br>(0.00% - 0.00%) | 0.00%<br>(0.00% - 0.00%) | 0.00%<br>(0.00% - 0.00%) | 0.00%<br>(0.00% - 0.00%) |
| <i>Tōkyō</i>     | 7.39%<br>(6.62% - 8.22%)    | 6.72%<br>(6.11% - 7.32%)    | 6.38%<br>(6.19% - 6.57%)   | 6.19%<br>(5.64% - 6.84%)   | 0.32%<br>(0.19% - 0.51%) | 0.36%<br>(0.24% - 0.52%) | 0.41%<br>(0.32% - 0.50%) | 0.43%<br>(0.29% - 0.60%) | 0.00%<br>(0.00% - 0.00%) | 0.00%<br>(0.00% - 0.00%) | 0.00%<br>(0.00% - 0.00%) | 0.00%<br>(0.00% - 0.00%) |
| <i>Kanagawa</i>  | 8.94%<br>(8.04% - 9.93%)    | 8.12%<br>(7.39% - 8.81%)    | 7.77%<br>(7.58% - 7.96%)   | 7.54%<br>(6.88% - 8.25%)   | 0.63%<br>(0.42% - 0.91%) | 0.70%<br>(0.50% - 0.93%) | 0.75%<br>(0.62% - 0.88%) | 0.76%<br>(0.56% - 0.98%) | 0.00%<br>(0.00% - 0.00%) | 0.00%<br>(0.00% - 0.00%) | 0.00%<br>(0.00% - 0.00%) | 0.00%<br>(0.00% - 0.00%) |
| <i>Niigata</i>   | 11.82%<br>(10.64% - 13.07%) | 10.78%<br>(9.79% - 11.94%)  | 10.40%<br>(9.45% - 11.33%) | 9.98%<br>(8.99% - 11.02%)  | 1.27%<br>(0.85% - 1.78%) | 1.34%<br>(0.95% - 1.80%) | 1.41%<br>(1.05% - 1.80%) | 1.38%<br>(1.01% - 1.81%) | 0.00%<br>(0.00% - 0.02%) | 0.01%<br>(0.00% - 0.02%) | 0.01%<br>(0.00% - 0.02%) | 0.01%<br>(0.00% - 0.02%) |
| <i>Toyama</i>    | 8.98%<br>(8.04% - 10.00%)   | 8.20%<br>(7.39% - 9.04%)    | 7.88%<br>(7.14% - 8.67%)   | 7.55%<br>(6.82% - 8.33%)   | 1.10%<br>(0.79% - 1.46%) | 1.14%<br>(0.86% - 1.46%) | 1.16%<br>(0.90% - 1.45%) | 1.13%<br>(0.87% - 1.41%) | 0.00%<br>(0.00% - 0.01%) | 0.00%<br>(0.00% - 0.01%) | 0.00%<br>(0.00% - 0.01%) | 0.00%<br>(0.00% - 0.01%) |
| <i>Ishikawa</i>  | 9.94%<br>(9.01% - 10.94%)   | 9.01%<br>(8.18% - 9.91%)    | 8.68%<br>(7.88% - 9.55%)   | 8.38%<br>(7.62% - 9.28%)   | 1.24%<br>(0.91% - 1.61%) | 1.25%<br>(0.96% - 1.60%) | 1.30%<br>(1.02% - 1.65%) | 1.27%<br>(0.99% - 1.60%) | 0.00%<br>(0.00% - 0.02%) | 0.00%<br>(0.00% - 0.02%) | 0.01%<br>(0.00% - 0.03%) | 0.01%<br>(0.00% - 0.02%) |
| <i>Fukui</i>     | 8.54%<br>(7.75% - 9.51%)    | 7.70%<br>(6.95% - 8.53%)    | 7.34%<br>(6.58% - 8.14%)   | 7.08%<br>(6.42% - 7.89%)   | 0.93%<br>(0.67% - 1.26%) | 0.94%<br>(0.70% - 1.23%) | 0.97%<br>(0.72% - 1.26%) | 0.95%<br>(0.73% - 1.23%) | 0.00%<br>(0.00% - 0.00%) | 0.00%<br>(0.00% - 0.00%) | 0.00%<br>(0.00% - 0.00%) | 0.00%<br>(0.00% - 0.00%) |
| <i>Yamanashi</i> | 9.20%<br>(8.28% - 10.24%)   | 8.46%<br>(7.71% - 9.41%)    | 8.06%<br>(7.28% - 8.89%)   | 7.74%<br>(6.99% - 8.58%)   | 0.69%<br>(0.41% - 1.04%) | 0.81%<br>(0.55% - 1.11%) | 0.86%<br>(0.61% - 1.14%) | 0.85%<br>(0.63% - 1.15%) | 0.00%<br>(0.00% - 0.00%) | 0.00%<br>(0.00% - 0.00%) | 0.00%<br>(0.00% - 0.00%) | 0.00%<br>(0.00% - 0.00%) |
| <i>Nagano</i>    | 8.67%<br>(7.78% - 9.57%)    | 7.91%<br>(7.15% - 8.73%)    | 7.65%<br>(6.84% - 8.48%)   | 7.39%<br>(6.63% - 8.18%)   | 0.87%<br>(0.59% - 1.17%) | 0.90%<br>(0.67% - 1.19%) | 0.94%<br>(0.68% - 1.21%) | 0.91%<br>(0.67% - 1.19%) | 0.00%<br>(0.00% - 0.00%) | 0.00%<br>(0.00% - 0.00%) | 0.00%<br>(0.00% - 0.00%) | 0.00%<br>(0.00% - 0.00%) |
| <i>Gifu</i>      | 8.69%<br>(7.82% - 9.61%)    | 7.89%<br>(7.13% - 8.65%)    | 7.53%<br>(6.74% - 8.32%)   | 7.23%<br>(6.53% - 8.02%)   | 1.00%<br>(0.71% - 1.32%) | 1.00%<br>(0.75% - 1.27%) | 1.03%<br>(0.79% - 1.31%) | 1.00%<br>(0.78% - 1.28%) | 0.00%<br>(0.00% - 0.01%) | 0.00%<br>(0.00% - 0.01%) | 0.00%<br>(0.00% - 0.01%) | 0.00%<br>(0.00% - 0.01%) |
| <i>Shizuoka</i>  | 12.38%<br>(11.20% - 13.61%) | 11.16%<br>(10.15% - 12.16%) | 10.64%<br>(9.76% - 11.51%) | 10.22%<br>(9.22% - 11.21%) | 1.41%<br>(0.93% - 1.95%) | 1.50%<br>(1.10% - 1.94%) | 1.54%<br>(1.20% - 1.93%) | 1.50%<br>(1.11% - 1.93%) | 0.01%<br>(0.00% - 0.03%) | 0.01%<br>(0.00% - 0.03%) | 0.01%<br>(0.00% - 0.03%) | 0.01%<br>(0.00% - 0.04%) |
| <i>Aichi</i>     | 8.21%<br>(7.36% - 9.13%)    | 7.40%<br>(6.76% - 8.09%)    | 6.92%<br>(6.74% - 7.10%)   | 6.57%<br>(5.99% - 7.18%)   | 0.45%<br>(0.28% - 0.70%) | 0.51%<br>(0.34% - 0.70%) | 0.54%<br>(0.43% - 0.64%) | 0.55%<br>(0.40% - 0.71%) | 0.00%<br>(0.00% - 0.00%) | 0.00%<br>(0.00% - 0.00%) | 0.00%<br>(0.00% - 0.00%) | 0.00%<br>(0.00% - 0.00%) |
| <i>Mie</i>       | 8.73%<br>(7.88% - 9.70%)    | 7.89%<br>(7.07% - 8.77%)    | 7.47%<br>(6.70% - 8.26%)   | 7.10%<br>(6.42% - 7.85%)   | 0.98%<br>(0.71% - 1.34%) | 0.98%<br>(0.74% - 1.31%) | 1.01%<br>(0.77% - 1.29%) | 0.97%<br>(0.74% - 1.24%) | 0.00%<br>(0.00% - 0.00%) | 0.00%<br>(0.00% - 0.00%) | 0.00%<br>(0.00% - 0.01%) | 0.00%<br>(0.00% - 0.00%) |
| <i>Shiga</i>     | 10.36%<br>(9.31% - 11.53%)  | 9.25%<br>(8.34% - 10.22%)   | 8.85%<br>(8.04% - 9.78%)   | 8.52%<br>(7.66% - 9.44%)   | 0.86%<br>(0.54% - 1.23%) | 0.95%<br>(0.66% - 1.30%) | 1.02%<br>(0.75% - 1.34%) | 1.01%<br>(0.74% - 1.33%) | 0.00%<br>(0.00% - 0.00%) | 0.00%<br>(0.00% - 0.01%) | 0.00%<br>(0.00% - 0.01%) | 0.00%<br>(0.00% - 0.01%) |

Table S8a. Estimated overall, severe, and extreme **stunting** prevalence (%) in children under 5 years, both sexes, in 1990, 2000, 2010, and 2020.

| Location         | Total                      |                            |                            |                            | Severe                  |                         |                         |                         | Extreme                 |                         |                         |                         |
|------------------|----------------------------|----------------------------|----------------------------|----------------------------|-------------------------|-------------------------|-------------------------|-------------------------|-------------------------|-------------------------|-------------------------|-------------------------|
|                  | 1990                       | 2000                       | 2010                       | 2020                       | 1990                    | 2000                    | 2010                    | 2020                    | 1990                    | 2000                    | 2010                    | 2020                    |
| <i>Kyōto</i>     | 10.58<br>(9.53% - 11.76%)  | 9.50<br>(8.56% - 10.53%)   | 9.06<br>(8.17% - 10.02%)   | 8.71<br>(7.87% - 9.70%)    | 0.87<br>(0.56% - 1.29%) | 0.97<br>(0.66% - 1.31%) | 1.05<br>(0.76% - 1.39%) | 1.04<br>(0.75% - 1.39%) | 0.00<br>(0.00% - 0.01%) | 0.00<br>(0.00% - 0.01%) | 0.00<br>(0.00% - 0.01%) | 0.00<br>(0.00% - 0.01%) |
| <i>Ōsaka</i>     | 9.60<br>(8.68% - 10.62%)   | 8.53<br>(7.86% - 9.30%)    | 8.06<br>(7.89% - 8.22%)    | 7.68<br>(7.03% - 8.37%)    | 0.67<br>(0.42% - 0.97%) | 0.74<br>(0.54% - 0.97%) | 0.80<br>(0.66% - 0.93%) | 0.80<br>(0.60% - 1.03%) | 0.00<br>(0.00% - 0.00%) | 0.00<br>(0.00% - 0.00%) | 0.00<br>(0.00% - 0.00%) | 0.00<br>(0.00% - 0.00%) |
| <i>Hyōgo</i>     | 8.49<br>(7.61% - 9.46%)    | 7.55<br>(6.74% - 8.35%)    | 7.21<br>(6.54% - 7.90%)    | 6.91<br>(6.22% - 7.60%)    | 0.54<br>(0.31% - 0.81%) | 0.59<br>(0.40% - 0.83%) | 0.66<br>(0.47% - 0.87%) | 0.65<br>(0.46% - 0.88%) | 0.00<br>(0.00% - 0.00%) | 0.00<br>(0.00% - 0.00%) | 0.00<br>(0.00% - 0.00%) | 0.00<br>(0.00% - 0.00%) |
| <i>Nara</i>      | 9.25<br>(8.32% - 10.28%)   | 8.44<br>(7.59% - 9.42%)    | 8.16<br>(7.35% - 9.13%)    | 7.89<br>(7.06% - 8.77%)    | 0.76<br>(0.48% - 1.07%) | 0.87<br>(0.60% - 1.20%) | 0.94<br>(0.68% - 1.27%) | 0.93<br>(0.68% - 1.22%) | 0.00<br>(0.00% - 0.00%) | 0.00<br>(0.00% - 0.00%) | 0.00<br>(0.00% - 0.00%) | 0.00<br>(0.00% - 0.00%) |
| <i>Wakayama</i>  | 9.53<br>(8.57% - 10.63%)   | 8.67<br>(7.78% - 9.66%)    | 8.19<br>(7.40% - 9.08%)    | 7.84<br>(7.06% - 8.60%)    | 0.87<br>(0.56% - 1.27%) | 0.96<br>(0.68% - 1.30%) | 0.99<br>(0.73% - 1.30%) | 0.97<br>(0.73% - 1.25%) | 0.00<br>(0.00% - 0.00%) | 0.00<br>(0.00% - 0.00%) | 0.00<br>(0.00% - 0.00%) | 0.00<br>(0.00% - 0.00%) |
| <i>Tottori</i>   | 9.34<br>(8.42% - 10.30%)   | 8.51<br>(7.70% - 9.41%)    | 8.22<br>(7.47% - 9.11%)    | 7.92<br>(7.16% - 8.82%)    | 1.09<br>(0.76% - 1.44%) | 1.14<br>(0.87% - 1.46%) | 1.17<br>(0.91% - 1.51%) | 1.15<br>(0.88% - 1.47%) | 0.00<br>(0.00% - 0.01%) | 0.00<br>(0.00% - 0.01%) | 0.00<br>(0.00% - 0.01%) | 0.00<br>(0.00% - 0.01%) |
| <i>Shimane</i>   | 9.45<br>(8.47% - 10.49%)   | 8.59<br>(7.70% - 9.50%)    | 8.19<br>(7.36% - 9.08%)    | 7.81<br>(7.03% - 8.65%)    | 1.00<br>(0.68% - 1.37%) | 1.06<br>(0.77% - 1.39%) | 1.10<br>(0.81% - 1.40%) | 1.06<br>(0.80% - 1.37%) | 0.00<br>(0.00% - 0.00%) | 0.00<br>(0.00% - 0.01%) | 0.00<br>(0.00% - 0.01%) | 0.00<br>(0.00% - 0.01%) |
| <i>Okayama</i>   | 6.22<br>(5.53% - 6.99%)    | 5.61<br>(4.98% - 6.24%)    | 5.35<br>(4.80% - 5.94%)    | 5.11<br>(4.59% - 5.70%)    | 0.13<br>(0.07% - 0.23%) | 0.17<br>(0.10% - 0.28%) | 0.20<br>(0.12% - 0.30%) | 0.20<br>(0.12% - 0.32%) | 0.00<br>(0.00% - 0.00%) | 0.00<br>(0.00% - 0.00%) | 0.00<br>(0.00% - 0.00%) | 0.00<br>(0.00% - 0.00%) |
| <i>Hiroshima</i> | 6.46<br>(5.76% - 7.25%)    | 5.85<br>(5.23% - 6.51%)    | 5.63<br>(5.09% - 6.25%)    | 5.41<br>(4.85% - 5.99%)    | 0.15<br>(0.06% - 0.30%) | 0.20<br>(0.09% - 0.35%) | 0.25<br>(0.14% - 0.39%) | 0.25<br>(0.14% - 0.39%) | 0.00<br>(0.00% - 0.00%) | 0.00<br>(0.00% - 0.00%) | 0.00<br>(0.00% - 0.00%) | 0.00<br>(0.00% - 0.00%) |
| <i>Yamaguchi</i> | 11.75<br>(10.72% - 12.84%) | 10.73<br>(9.81% - 11.74%)  | 10.20<br>(9.32% - 11.15%)  | 9.71<br>(8.85% - 10.64%)   | 1.79<br>(1.37% - 2.27%) | 1.83<br>(1.45% - 2.28%) | 1.83<br>(1.47% - 2.25%) | 1.75<br>(1.41% - 2.12%) | 0.03<br>(0.00% - 0.08%) | 0.04<br>(0.01% - 0.10%) | 0.05<br>(0.01% - 0.10%) | 0.04<br>(0.01% - 0.10%) |
| <i>Tokushima</i> | 9.64<br>(8.68% - 10.71%)   | 8.76<br>(7.84% - 9.72%)    | 8.24<br>(7.38% - 9.08%)    | 7.81<br>(7.02% - 8.63%)    | 0.81<br>(0.50% - 1.18%) | 0.91<br>(0.62% - 1.26%) | 0.95<br>(0.69% - 1.27%) | 0.92<br>(0.67% - 1.22%) | 0.00<br>(0.00% - 0.00%) | 0.00<br>(0.00% - 0.00%) | 0.00<br>(0.00% - 0.00%) | 0.00<br>(0.00% - 0.00%) |
| <i>Kagawa</i>    | 9.11<br>(8.28% - 10.11%)   | 8.37<br>(7.57% - 9.23%)    | 8.02<br>(7.21% - 8.90%)    | 7.68<br>(6.95% - 8.48%)    | 1.04<br>(0.75% - 1.39%) | 1.09<br>(0.82% - 1.41%) | 1.12<br>(0.82% - 1.44%) | 1.09<br>(0.83% - 1.39%) | 0.00<br>(0.00% - 0.01%) | 0.00<br>(0.00% - 0.01%) | 0.00<br>(0.00% - 0.01%) | 0.00<br>(0.00% - 0.01%) |
| <i>Ehime</i>     | 9.78<br>(8.87% - 10.81%)   | 8.81<br>(7.96% - 9.72%)    | 8.41<br>(7.64% - 9.24%)    | 8.03<br>(7.25% - 8.86%)    | 1.24<br>(0.91% - 1.62%) | 1.24<br>(0.94% - 1.59%) | 1.28<br>(1.00% - 1.59%) | 1.23<br>(0.95% - 1.52%) | 0.00<br>(0.00% - 0.02%) | 0.00<br>(0.00% - 0.02%) | 0.01<br>(0.00% - 0.02%) | 0.00<br>(0.00% - 0.02%) |
| <i>Kāchi</i>     | 9.77<br>(8.77% - 10.88%)   | 8.85<br>(8.02% - 9.72%)    | 8.41<br>(7.61% - 9.32%)    | 7.92<br>(7.23% - 8.78%)    | 1.27<br>(0.91% - 1.68%) | 1.29<br>(0.97% - 1.66%) | 1.31<br>(1.03% - 1.67%) | 1.25<br>(0.99% - 1.60%) | 0.00<br>(0.00% - 0.02%) | 0.00<br>(0.00% - 0.02%) | 0.01<br>(0.00% - 0.03%) | 0.00<br>(0.00% - 0.03%) |
| <i>Fukuoka</i>   | 13.85<br>(12.51% - 15.21%) | 12.50<br>(11.44% - 13.48%) | 11.92<br>(11.71% - 12.15%) | 11.38<br>(10.45% - 12.30%) | 1.25<br>(0.79% - 1.82%) | 1.45<br>(1.05% - 1.90%) | 1.57<br>(1.32% - 1.81%) | 1.55<br>(1.16% - 2.00%) | 0.00<br>(0.00% - 0.02%) | 0.01<br>(0.00% - 0.02%) | 0.00<br>(0.00% - 0.01%) | 0.01<br>(0.00% - 0.03%) |
| <i>Saga</i>      | 10.79<br>(9.80% - 11.87%)  | 9.73<br>(8.88% - 10.64%)   | 9.18<br>(8.31% - 10.15%)   | 8.81<br>(8.01% - 9.70%)    | 1.57<br>(1.21% - 2.01%) | 1.57<br>(1.22% - 1.95%) | 1.57<br>(1.25% - 1.94%) | 1.52<br>(1.22% - 1.85%) | 0.02<br>(0.00% - 0.05%) | 0.02<br>(0.00% - 0.06%) | 0.03<br>(0.00% - 0.07%) | 0.02<br>(0.00% - 0.06%) |
| <i>Nagasaki</i>  | 12.92<br>(11.68% - 14.29%) | 11.42<br>(10.37% - 12.58%) | 10.81<br>(9.93% - 11.74%)  | 10.30<br>(9.25% - 11.36%)  | 1.10<br>(0.66% - 1.63%) | 1.25<br>(0.86% - 1.73%) | 1.35<br>(1.01% - 1.73%) | 1.34<br>(0.99% - 1.74%) | 0.00<br>(0.00% - 0.01%) | 0.00<br>(0.00% - 0.02%) | 0.00<br>(0.00% - 0.02%) | 0.00<br>(0.00% - 0.02%) |
| <i>Kumamoto</i>  | 8.87<br>(8.00% - 9.80%)    | 7.99<br>(7.17% - 8.85%)    | 7.63<br>(6.84% - 8.41%)    | 7.33<br>(6.60% - 8.13%)    | 0.95<br>(0.66% - 1.27%) | 0.99<br>(0.73% - 1.30%) | 1.02<br>(0.76% - 1.31%) | 0.99<br>(0.74% - 1.27%) | 0.00<br>(0.00% - 0.00%) | 0.00<br>(0.00% - 0.00%) | 0.00<br>(0.00% - 0.00%) | 0.00<br>(0.00% - 0.01%) |
| <i>Ōita</i>      | 10.16<br>(9.18% - 11.18%)  | 9.04<br>(8.17% - 9.95%)    | 8.62<br>(7.85% - 9.51%)    | 8.29<br>(7.50% - 9.08%)    | 1.31<br>(0.94% - 1.71%) | 1.31<br>(1.01% - 1.66%) | 1.34<br>(1.07% - 1.68%) | 1.30<br>(1.02% - 1.61%) | 0.00<br>(0.00% - 0.02%) | 0.01<br>(0.00% - 0.02%) | 0.01<br>(0.00% - 0.03%) | 0.01<br>(0.00% - 0.03%) |
| <i>Miyazaki</i>  | 7.89<br>(7.08% - 8.75%)    | 6.98<br>(6.26% - 7.78%)    | 6.61<br>(5.92% - 7.35%)    | 6.31<br>(5.68% - 7.01%)    | 0.58<br>(0.36% - 0.85%) | 0.63<br>(0.42% - 0.87%) | 0.67<br>(0.46% - 0.89%) | 0.65<br>(0.45% - 0.87%) | 0.00<br>(0.00% - 0.00%) | 0.00<br>(0.00% - 0.00%) | 0.00<br>(0.00% - 0.00%) | 0.00<br>(0.00% - 0.00%) |
| <i>Kagoshima</i> | 7.84<br>(7.05% - 8.75%)    | 6.90<br>(6.24% - 7.65%)    | 6.47<br>(5.84% - 7.17%)    | 6.13<br>(5.51% - 6.80%)    | 0.61<br>(0.38% - 0.88%) | 0.63<br>(0.44% - 0.88%) | 0.67<br>(0.48% - 0.90%) | 0.65<br>(0.47% - 0.88%) | 0.00<br>(0.00% - 0.00%) | 0.00<br>(0.00% - 0.00%) | 0.00<br>(0.00% - 0.00%) | 0.00<br>(0.00% - 0.00%) |
| <i>Okinawa</i>   | 9.41<br>(8.47% - 10.43%)   | 8.58<br>(7.80% - 9.52%)    | 8.03<br>(7.22% - 8.88%)    | 7.57<br>(6.81% - 8.38%)    | 1.04<br>(0.73% - 1.39%) | 1.07<br>(0.80% - 1.38%) | 1.09<br>(0.82% - 1.39%) | 1.03<br>(0.78% - 1.33%) | 0.00<br>(0.00% - 0.01%) | 0.00<br>(0.00% - 0.01%) | 0.00<br>(0.00% - 0.01%) | 0.00<br>(0.00% - 0.01%) |



Table S8a. Estimated overall, severe, and extreme **stunting** prevalence (%) in children under 5 years, both sexes, in 1990, 2000, 2010, and 2020.

| Location                         | Total                    |                          |                          |                          | Severe                   |                          |                          |                          | Extreme                  |                          |                          |                          |
|----------------------------------|--------------------------|--------------------------|--------------------------|--------------------------|--------------------------|--------------------------|--------------------------|--------------------------|--------------------------|--------------------------|--------------------------|--------------------------|
|                                  | 1990                     | 2000                     | 2010                     | 2020                     | 1990                     | 2000                     | 2010                     | 2020                     | 1990                     | 2000                     | 2010                     | 2020                     |
| Republic of Korea                | 2.98%<br>(2.65% - 3.32%) | 2.59%<br>(2.33% - 2.88%) | 2.59%<br>(2.42% - 2.77%) | 1.96%<br>(1.78% - 2.19%) | 0.00%<br>(0.00% - 0.01%) | 0.01%<br>(0.00% - 0.03%) | 0.03%<br>(0.01% - 0.07%) | 0.01%<br>(0.00% - 0.03%) | 0.00%<br>(0.00% - 0.00%) | 0.00%<br>(0.00% - 0.00%) | 0.00%<br>(0.00% - 0.00%) | 0.00%<br>(0.00% - 0.00%) |
| Singapore                        | 5.72%<br>(5.21% - 6.24%) | 4.44%<br>(4.11% - 4.81%) | 3.78%<br>(3.44% - 4.17%) | 3.50%<br>(3.15% - 3.92%) | 0.25%<br>(0.14% - 0.37%) | 0.23%<br>(0.15% - 0.33%) | 0.22%<br>(0.14% - 0.32%) | 0.21%<br>(0.12% - 0.31%) | 0.00%<br>(0.00% - 0.00%) | 0.00%<br>(0.00% - 0.00%) | 0.00%<br>(0.00% - 0.00%) | 0.00%<br>(0.00% - 0.00%) |
| <b>High-income North America</b> | 3.63%<br>(3.33% - 3.96%) | 3.36%<br>(3.10% - 3.61%) | 2.76%<br>(2.55% - 2.99%) | 2.58%<br>(2.35% - 2.85%) | 0.09%<br>(0.04% - 0.16%) | 0.13%<br>(0.08% - 0.19%) | 0.07%<br>(0.04% - 0.12%) | 0.06%<br>(0.02% - 0.10%) | 0.00%<br>(0.00% - 0.00%) | 0.00%<br>(0.00% - 0.00%) | 0.00%<br>(0.00% - 0.00%) | 0.00%<br>(0.00% - 0.00%) |
| Canada                           | 3.42%<br>(3.07% - 3.78%) | 3.04%<br>(2.73% - 3.37%) | 2.53%<br>(2.28% - 2.81%) | 2.46%<br>(2.21% - 2.73%) | 0.09%<br>(0.03% - 0.17%) | 0.10%<br>(0.05% - 0.17%) | 0.05%<br>(0.01% - 0.10%) | 0.05%<br>(0.02% - 0.11%) | 0.00%<br>(0.00% - 0.00%) | 0.00%<br>(0.00% - 0.00%) | 0.00%<br>(0.00% - 0.00%) | 0.00%<br>(0.00% - 0.00%) |
| United States of America         | 3.64%<br>(3.31% - 4.00%) | 3.39%<br>(3.10% - 3.67%) | 2.78%<br>(2.55% - 3.04%) | 2.60%<br>(2.34% - 2.89%) | 0.09%<br>(0.04% - 0.17%) | 0.13%<br>(0.08% - 0.20%) | 0.07%<br>(0.03% - 0.13%) | 0.06%<br>(0.02% - 0.11%) | 0.00%<br>(0.00% - 0.00%) | 0.00%<br>(0.00% - 0.00%) | 0.00%<br>(0.00% - 0.00%) | 0.00%<br>(0.00% - 0.00%) |
| Alabama                          | 3.93%<br>(3.37% - 4.53%) | 3.02%<br>(3.23% - 4.22%) | 3.02%<br>(2.62% - 3.48%) | 2.87%<br>(2.49% - 3.34%) | 0.10%<br>(0.02% - 0.23%) | 0.13%<br>(0.05% - 0.24%) | 0.07%<br>(0.02% - 0.16%) | 0.05%<br>(0.01% - 0.14%) | 0.00%<br>(0.00% - 0.00%) | 0.00%<br>(0.00% - 0.00%) | 0.00%<br>(0.00% - 0.00%) | 0.00%<br>(0.00% - 0.00%) |
| Alaska                           | 3.70%<br>(3.18% - 4.28%) | 3.42%<br>(2.98% - 3.92%) | 2.84%<br>(2.48% - 3.24%) | 2.62%<br>(2.24% - 3.05%) | 0.09%<br>(0.02% - 0.21%) | 0.13%<br>(0.05% - 0.24%) | 0.07%<br>(0.02% - 0.16%) | 0.06%<br>(0.01% - 0.14%) | 0.00%<br>(0.00% - 0.00%) | 0.00%<br>(0.00% - 0.00%) | 0.00%<br>(0.00% - 0.00%) | 0.00%<br>(0.00% - 0.00%) |
| Arizona                          | 3.78%<br>(3.20% - 4.37%) | 3.56%<br>(3.07% - 4.08%) | 2.85%<br>(2.45% - 3.29%) | 2.67%<br>(2.30% - 3.16%) | 0.10%<br>(0.02% - 0.22%) | 0.14%<br>(0.05% - 0.25%) | 0.08%<br>(0.02% - 0.17%) | 0.06%<br>(0.01% - 0.15%) | 0.00%<br>(0.00% - 0.00%) | 0.00%<br>(0.00% - 0.00%) | 0.00%<br>(0.00% - 0.00%) | 0.00%<br>(0.00% - 0.00%) |
| Arkansas                         | 3.97%<br>(3.42% - 4.57%) | 3.75%<br>(3.26% - 4.27%) | 3.09%<br>(2.71% - 3.53%) | 2.89%<br>(2.48% - 3.37%) | 0.10%<br>(0.02% - 0.22%) | 0.13%<br>(0.05% - 0.26%) | 0.07%<br>(0.02% - 0.17%) | 0.06%<br>(0.01% - 0.14%) | 0.00%<br>(0.00% - 0.00%) | 0.00%<br>(0.00% - 0.00%) | 0.00%<br>(0.00% - 0.00%) | 0.00%<br>(0.00% - 0.00%) |
| California                       | 3.69%<br>(3.22% - 4.25%) | 3.32%<br>(2.90% - 3.78%) | 2.68%<br>(2.35% - 3.04%) | 2.47%<br>(2.14% - 2.84%) | 0.09%<br>(0.02% - 0.20%) | 0.13%<br>(0.05% - 0.23%) | 0.07%<br>(0.02% - 0.15%) | 0.05%<br>(0.01% - 0.12%) | 0.00%<br>(0.00% - 0.00%) | 0.00%<br>(0.00% - 0.00%) | 0.00%<br>(0.00% - 0.00%) | 0.00%<br>(0.00% - 0.00%) |
| Colorado                         | 3.45%<br>(2.99% - 4.00%) | 3.29%<br>(2.88% - 3.75%) | 2.71%<br>(2.34% - 3.11%) | 2.51%<br>(2.15% - 2.94%) | 0.10%<br>(0.02% - 0.20%) | 0.13%<br>(0.05% - 0.24%) | 0.07%<br>(0.02% - 0.16%) | 0.06%<br>(0.01% - 0.13%) | 0.00%<br>(0.00% - 0.00%) | 0.00%<br>(0.00% - 0.00%) | 0.00%<br>(0.00% - 0.00%) | 0.00%<br>(0.00% - 0.00%) |
| Connecticut                      | 3.21%<br>(2.78% - 3.69%) | 3.04%<br>(2.66% - 3.47%) | 2.48%<br>(2.15% - 2.87%) | 2.34%<br>(2.02% - 2.75%) | 0.09%<br>(0.02% - 0.19%) | 0.12%<br>(0.05% - 0.23%) | 0.07%<br>(0.02% - 0.15%) | 0.05%<br>(0.01% - 0.13%) | 0.00%<br>(0.00% - 0.00%) | 0.00%<br>(0.00% - 0.00%) | 0.00%<br>(0.00% - 0.00%) | 0.00%<br>(0.00% - 0.00%) |
| Delaware                         | 3.57%<br>(3.04% - 4.13%) | 3.32%<br>(2.87% - 3.79%) | 2.72%<br>(2.36% - 3.10%) | 2.56%<br>(2.20% - 2.99%) | 0.09%<br>(0.01% - 0.20%) | 0.12%<br>(0.04% - 0.23%) | 0.07%<br>(0.02% - 0.15%) | 0.06%<br>(0.01% - 0.13%) | 0.00%<br>(0.00% - 0.00%) | 0.00%<br>(0.00% - 0.00%) | 0.00%<br>(0.00% - 0.00%) | 0.00%<br>(0.00% - 0.00%) |
| District of Columbia             | 4.37%<br>(3.79% - 5.06%) | 3.65%<br>(3.18% - 4.15%) | 2.88%<br>(2.50% - 3.29%) | 2.64%<br>(2.27% - 3.07%) | 0.07%<br>(0.01% - 0.20%) | 0.11%<br>(0.04% - 0.22%) | 0.06%<br>(0.01% - 0.15%) | 0.05%<br>(0.01% - 0.12%) | 0.00%<br>(0.00% - 0.00%) | 0.00%<br>(0.00% - 0.00%) | 0.00%<br>(0.00% - 0.00%) | 0.00%<br>(0.00% - 0.00%) |
| Florida                          | 3.62%<br>(3.13% - 4.17%) | 3.33%<br>(2.89% - 3.76%) | 2.74%<br>(2.40% - 3.13%) | 2.60%<br>(2.21% - 3.01%) | 0.10%<br>(0.02% - 0.22%) | 0.13%<br>(0.05% - 0.24%) | 0.07%<br>(0.02% - 0.16%) | 0.06%<br>(0.01% - 0.14%) | 0.00%<br>(0.00% - 0.00%) | 0.00%<br>(0.00% - 0.00%) | 0.00%<br>(0.00% - 0.00%) | 0.00%<br>(0.00% - 0.00%) |
| Georgia                          | 3.89%<br>(3.35% - 4.50%) | 3.61%<br>(3.12% - 4.10%) | 2.90%<br>(2.51% - 3.32%) | 2.72%<br>(2.35% - 3.15%) | 0.09%<br>(0.02% - 0.20%) | 0.13%<br>(0.05% - 0.24%) | 0.07%<br>(0.02% - 0.16%) | 0.06%<br>(0.01% - 0.13%) | 0.00%<br>(0.00% - 0.00%) | 0.00%<br>(0.00% - 0.00%) | 0.00%<br>(0.00% - 0.00%) | 0.00%<br>(0.00% - 0.00%) |
| Hawaii                           | 3.49%<br>(3.00% - 4.02%) | 3.27%<br>(2.84% - 3.75%) | 2.72%<br>(2.36% - 3.14%) | 2.56%<br>(2.19% - 2.97%) | 0.09%<br>(0.02% - 0.21%) | 0.13%<br>(0.05% - 0.23%) | 0.08%<br>(0.02% - 0.17%) | 0.06%<br>(0.01% - 0.14%) | 0.00%<br>(0.00% - 0.00%) | 0.00%<br>(0.00% - 0.00%) | 0.00%<br>(0.00% - 0.00%) | 0.00%<br>(0.00% - 0.00%) |
| Idaho                            | 3.79%<br>(3.24% - 4.37%) | 3.52%<br>(3.05% - 4.07%) | 2.87%<br>(2.49% - 3.28%) | 2.70%<br>(2.33% - 3.13%) | 0.10%<br>(0.02% - 0.22%) | 0.14%<br>(0.05% - 0.26%) | 0.08%<br>(0.02% - 0.17%) | 0.06%<br>(0.01% - 0.15%) | 0.00%<br>(0.00% - 0.00%) | 0.00%<br>(0.00% - 0.00%) | 0.00%<br>(0.00% - 0.00%) | 0.00%<br>(0.00% - 0.00%) |
| Illinois                         | 3.64%<br>(3.11% - 4.18%) | 3.34%<br>(2.93% - 3.80%) | 2.70%<br>(2.34% - 3.10%) | 2.51%<br>(2.15% - 2.93%) | 0.09%<br>(0.02% - 0.21%) | 0.13%<br>(0.04% - 0.23%) | 0.07%<br>(0.02% - 0.15%) | 0.05%<br>(0.01% - 0.14%) | 0.00%<br>(0.00% - 0.00%) | 0.00%<br>(0.00% - 0.00%) | 0.00%<br>(0.00% - 0.00%) | 0.00%<br>(0.00% - 0.00%) |
| Indiana                          | 3.67%<br>(3.15% - 4.26%) | 3.46%<br>(3.05% - 3.96%) | 2.89%<br>(2.53% - 3.34%) | 2.71%<br>(2.34% - 3.18%) | 0.10%<br>(0.02% - 0.22%) | 0.13%<br>(0.05% - 0.24%) | 0.07%<br>(0.02% - 0.16%) | 0.06%<br>(0.01% - 0.14%) | 0.00%<br>(0.00% - 0.00%) | 0.00%<br>(0.00% - 0.00%) | 0.00%<br>(0.00% - 0.00%) | 0.00%<br>(0.00% - 0.00%) |
| Iowa                             | 3.44%<br>(2.96% - 3.95%) | 3.31%<br>(2.90% - 3.77%) | 2.73%<br>(2.39% - 3.16%) | 2.54%<br>(2.20% - 2.95%) | 0.10%<br>(0.02% - 0.22%) | 0.13%<br>(0.05% - 0.24%) | 0.07%<br>(0.02% - 0.16%) | 0.06%<br>(0.01% - 0.14%) | 0.00%<br>(0.00% - 0.00%) | 0.00%<br>(0.00% - 0.00%) | 0.00%<br>(0.00% - 0.00%) | 0.00%<br>(0.00% - 0.00%) |
| Kansas                           | 3.53%<br>(3.07% - 4.11%) | 3.36%<br>(2.95% - 3.85%) | 2.83%<br>(2.46% - 3.23%) | 2.62%<br>(2.26% - 3.06%) | 0.10%<br>(0.02% - 0.23%) | 0.13%<br>(0.05% - 0.23%) | 0.07%<br>(0.02% - 0.17%) | 0.06%<br>(0.01% - 0.14%) | 0.00%<br>(0.00% - 0.00%) | 0.00%<br>(0.00% - 0.00%) | 0.00%<br>(0.00% - 0.00%) | 0.00%<br>(0.00% - 0.00%) |

Table S8a. Estimated overall, severe, and extreme **stunting** prevalence (%) in children under 5 years, both sexes, in 1990, 2000, 2010, and 2020.

| Location       | Total                    |                          |                          |                          | Severe                   |                          |                          |                          | Extreme                  |                          |                          |                          |
|----------------|--------------------------|--------------------------|--------------------------|--------------------------|--------------------------|--------------------------|--------------------------|--------------------------|--------------------------|--------------------------|--------------------------|--------------------------|
|                | 1990                     | 2000                     | 2010                     | 2020                     | 1990                     | 2000                     | 2010                     | 2020                     | 1990                     | 2000                     | 2010                     | 2020                     |
| Kentucky       | 3.76%<br>(3.26% - 4.33%) | 3.54%<br>(3.08% - 4.03%) | 2.97%<br>(2.58% - 3.41%) | 2.75%<br>(2.36% - 3.18%) | 0.10%<br>(0.02% - 0.23%) | 0.14%<br>(0.05% - 0.25%) | 0.07%<br>(0.02% - 0.17%) | 0.06%<br>(0.01% - 0.14%) | 0.00%<br>(0.00% - 0.00%) | 0.00%<br>(0.00% - 0.00%) | 0.00%<br>(0.00% - 0.00%) | 0.00%<br>(0.00% - 0.00%) |
| Louisiana      | 3.98%<br>(3.38% - 4.58%) | 3.71%<br>(3.22% - 4.23%) | 2.95%<br>(2.58% - 3.36%) | 2.78%<br>(2.40% - 3.24%) | 0.10%<br>(0.02% - 0.22%) | 0.13%<br>(0.04% - 0.24%) | 0.07%<br>(0.01% - 0.17%) | 0.05%<br>(0.01% - 0.14%) | 0.00%<br>(0.00% - 0.00%) | 0.00%<br>(0.00% - 0.00%) | 0.00%<br>(0.00% - 0.00%) | 0.00%<br>(0.00% - 0.00%) |
| Maine          | 3.43%<br>(2.93% - 3.95%) | 3.26%<br>(2.81% - 3.69%) | 2.71%<br>(2.37% - 3.09%) | 2.57%<br>(2.20% - 2.95%) | 0.10%<br>(0.02% - 0.20%) | 0.13%<br>(0.05% - 0.24%) | 0.07%<br>(0.02% - 0.16%) | 0.06%<br>(0.01% - 0.14%) | 0.00%<br>(0.00% - 0.00%) | 0.00%<br>(0.00% - 0.00%) | 0.00%<br>(0.00% - 0.00%) | 0.00%<br>(0.00% - 0.00%) |
| Maryland       | 3.49%<br>(3.02% - 3.99%) | 3.28%<br>(2.85% - 3.75%) | 2.65%<br>(2.28% - 3.03%) | 2.52%<br>(2.16% - 2.95%) | 0.09%<br>(0.02% - 0.20%) | 0.12%<br>(0.05% - 0.23%) | 0.07%<br>(0.02% - 0.15%) | 0.05%<br>(0.01% - 0.14%) | 0.00%<br>(0.00% - 0.00%) | 0.00%<br>(0.00% - 0.00%) | 0.00%<br>(0.00% - 0.00%) | 0.00%<br>(0.00% - 0.00%) |
| Massachusetts  | 3.20%<br>(2.77% - 3.71%) | 3.00%<br>(2.61% - 3.46%) | 2.48%<br>(2.13% - 2.84%) | 2.31%<br>(1.98% - 2.66%) | 0.09%<br>(0.02% - 0.20%) | 0.13%<br>(0.05% - 0.23%) | 0.07%<br>(0.02% - 0.15%) | 0.05%<br>(0.01% - 0.12%) | 0.00%<br>(0.00% - 0.00%) | 0.00%<br>(0.00% - 0.00%) | 0.00%<br>(0.00% - 0.00%) | 0.00%<br>(0.00% - 0.00%) |
| Michigan       | 3.66%<br>(3.16% - 4.19%) | 3.39%<br>(2.95% - 3.87%) | 2.85%<br>(2.48% - 3.29%) | 2.63%<br>(2.27% - 3.06%) | 0.09%<br>(0.02% - 0.21%) | 0.13%<br>(0.05% - 0.23%) | 0.07%<br>(0.02% - 0.16%) | 0.05%<br>(0.01% - 0.13%) | 0.00%<br>(0.00% - 0.00%) | 0.00%<br>(0.00% - 0.00%) | 0.00%<br>(0.00% - 0.00%) | 0.00%<br>(0.00% - 0.00%) |
| Minnesota      | 3.26%<br>(2.80% - 3.76%) | 3.11%<br>(2.72% - 3.57%) | 2.57%<br>(2.23% - 2.97%) | 2.40%<br>(2.06% - 2.82%) | 0.10%<br>(0.03% - 0.21%) | 0.13%<br>(0.05% - 0.24%) | 0.08%<br>(0.02% - 0.16%) | 0.06%<br>(0.01% - 0.13%) | 0.00%<br>(0.00% - 0.00%) | 0.00%<br>(0.00% - 0.00%) | 0.00%<br>(0.00% - 0.00%) | 0.00%<br>(0.00% - 0.00%) |
| Mississippi    | 4.11%<br>(3.57% - 4.79%) | 3.89%<br>(3.36% - 4.47%) | 3.17%<br>(2.75% - 3.66%) | 2.97%<br>(2.55% - 3.45%) | 0.10%<br>(0.02% - 0.22%) | 0.13%<br>(0.04% - 0.24%) | 0.07%<br>(0.01% - 0.16%) | 0.05%<br>(0.01% - 0.14%) | 0.00%<br>(0.00% - 0.00%) | 0.00%<br>(0.00% - 0.00%) | 0.00%<br>(0.00% - 0.00%) | 0.00%<br>(0.00% - 0.00%) |
| Missouri       | 3.67%<br>(3.18% - 4.22%) | 3.43%<br>(2.99% - 3.92%) | 2.86%<br>(2.49% - 3.27%) | 2.72%<br>(2.33% - 3.16%) | 0.10%<br>(0.02% - 0.22%) | 0.13%<br>(0.05% - 0.23%) | 0.07%<br>(0.02% - 0.16%) | 0.06%<br>(0.01% - 0.14%) | 0.00%<br>(0.00% - 0.00%) | 0.00%<br>(0.00% - 0.00%) | 0.00%<br>(0.00% - 0.00%) | 0.00%<br>(0.00% - 0.00%) |
| Montana        | 3.67%<br>(3.16% - 4.25%) | 3.44%<br>(3.00% - 3.92%) | 2.87%<br>(2.51% - 3.28%) | 2.64%<br>(2.27% - 3.04%) | 0.10%<br>(0.02% - 0.22%) | 0.13%<br>(0.05% - 0.24%) | 0.07%<br>(0.02% - 0.16%) | 0.06%<br>(0.01% - 0.14%) | 0.00%<br>(0.00% - 0.00%) | 0.00%<br>(0.00% - 0.00%) | 0.00%<br>(0.00% - 0.00%) | 0.00%<br>(0.00% - 0.00%) |
| Nebraska       | 3.46%<br>(2.98% - 3.97%) | 3.30%<br>(2.87% - 3.79%) | 2.71%<br>(2.35% - 3.10%) | 2.50%<br>(2.16% - 2.89%) | 0.10%<br>(0.02% - 0.21%) | 0.14%<br>(0.06% - 0.26%) | 0.08%<br>(0.02% - 0.16%) | 0.06%<br>(0.01% - 0.14%) | 0.00%<br>(0.00% - 0.00%) | 0.00%<br>(0.00% - 0.00%) | 0.00%<br>(0.00% - 0.00%) | 0.00%<br>(0.00% - 0.00%) |
| Nevada         | 3.85%<br>(3.30% - 4.45%) | 3.59%<br>(3.14% - 4.08%) | 2.90%<br>(2.52% - 3.33%) | 2.74%<br>(2.35% - 3.19%) | 0.09%<br>(0.02% - 0.21%) | 0.13%<br>(0.05% - 0.23%) | 0.07%<br>(0.02% - 0.16%) | 0.06%<br>(0.01% - 0.14%) | 0.00%<br>(0.00% - 0.00%) | 0.00%<br>(0.00% - 0.00%) | 0.00%<br>(0.00% - 0.00%) | 0.00%<br>(0.00% - 0.00%) |
| New Hampshire  | 3.29%<br>(2.83% - 3.82%) | 3.08%<br>(2.70% - 3.51%) | 2.53%<br>(2.23% - 2.88%) | 2.39%<br>(2.06% - 2.76%) | 0.09%<br>(0.02% - 0.21%) | 0.12%<br>(0.05% - 0.23%) | 0.07%<br>(0.02% - 0.14%) | 0.06%<br>(0.01% - 0.13%) | 0.00%<br>(0.00% - 0.00%) | 0.00%<br>(0.00% - 0.00%) | 0.00%<br>(0.00% - 0.00%) | 0.00%<br>(0.00% - 0.00%) |
| New Jersey     | 3.35%<br>(2.91% - 3.88%) | 3.13%<br>(2.72% - 3.60%) | 2.56%<br>(2.23% - 2.93%) | 2.43%<br>(2.09% - 2.82%) | 0.09%<br>(0.02% - 0.20%) | 0.13%<br>(0.04% - 0.22%) | 0.07%<br>(0.02% - 0.15%) | 0.06%<br>(0.01% - 0.13%) | 0.00%<br>(0.00% - 0.00%) | 0.00%<br>(0.00% - 0.00%) | 0.00%<br>(0.00% - 0.00%) | 0.00%<br>(0.00% - 0.00%) |
| New Mexico     | 4.00%<br>(3.45% - 4.61%) | 3.69%<br>(3.16% - 4.21%) | 3.00%<br>(2.62% - 3.44%) | 2.83%<br>(2.44% - 3.31%) | 0.10%<br>(0.02% - 0.23%) | 0.13%<br>(0.05% - 0.25%) | 0.07%<br>(0.02% - 0.16%) | 0.06%<br>(0.01% - 0.14%) | 0.00%<br>(0.00% - 0.00%) | 0.00%<br>(0.00% - 0.00%) | 0.00%<br>(0.00% - 0.00%) | 0.00%<br>(0.00% - 0.00%) |
| New York       | 3.55%<br>(3.08% - 4.09%) | 3.18%<br>(2.80% - 3.64%) | 2.62%<br>(2.29% - 2.99%) | 2.45%<br>(2.11% - 2.83%) | 0.09%<br>(0.02% - 0.19%) | 0.12%<br>(0.05% - 0.23%) | 0.07%<br>(0.02% - 0.15%) | 0.05%<br>(0.01% - 0.13%) | 0.00%<br>(0.00% - 0.00%) | 0.00%<br>(0.00% - 0.00%) | 0.00%<br>(0.00% - 0.00%) | 0.00%<br>(0.00% - 0.00%) |
| North Carolina | 3.78%<br>(3.25% - 4.40%) | 3.50%<br>(3.06% - 3.98%) | 2.86%<br>(2.48% - 3.25%) | 2.69%<br>(2.30% - 3.10%) | 0.09%<br>(0.02% - 0.21%) | 0.13%<br>(0.05% - 0.24%) | 0.07%<br>(0.02% - 0.16%) | 0.06%<br>(0.01% - 0.13%) | 0.00%<br>(0.00% - 0.00%) | 0.00%<br>(0.00% - 0.00%) | 0.00%<br>(0.00% - 0.00%) | 0.00%<br>(0.00% - 0.00%) |
| North Dakota   | 3.51%<br>(3.00% - 4.05%) | 3.29%<br>(2.86% - 3.76%) | 2.78%<br>(2.43% - 3.19%) | 2.50%<br>(2.17% - 2.89%) | 0.10%<br>(0.02% - 0.22%) | 0.13%<br>(0.05% - 0.25%) | 0.08%<br>(0.02% - 0.16%) | 0.05%<br>(0.01% - 0.13%) | 0.00%<br>(0.00% - 0.00%) | 0.00%<br>(0.00% - 0.00%) | 0.00%<br>(0.00% - 0.00%) | 0.00%<br>(0.00% - 0.00%) |
| Ohio           | 3.63%<br>(3.11% - 4.18%) | 3.42%<br>(2.98% - 3.91%) | 2.84%<br>(2.46% - 3.26%) | 2.74%<br>(2.34% - 3.18%) | 0.10%<br>(0.02% - 0.21%) | 0.13%<br>(0.05% - 0.24%) | 0.07%<br>(0.02% - 0.16%) | 0.06%<br>(0.01% - 0.14%) | 0.00%<br>(0.00% - 0.00%) | 0.00%<br>(0.00% - 0.00%) | 0.00%<br>(0.00% - 0.00%) | 0.00%<br>(0.00% - 0.00%) |
| Oklahoma       | 3.72%<br>(3.19% - 4.34%) | 3.66%<br>(3.18% - 4.17%) | 3.02%<br>(2.62% - 3.44%) | 2.79%<br>(2.40% - 3.26%) | 0.10%<br>(0.02% - 0.22%) | 0.13%<br>(0.05% - 0.24%) | 0.07%<br>(0.01% - 0.15%) | 0.05%<br>(0.01% - 0.14%) | 0.00%<br>(0.00% - 0.00%) | 0.00%<br>(0.00% - 0.00%) | 0.00%<br>(0.00% - 0.00%) | 0.00%<br>(0.00% - 0.00%) |
| Oregon         | 3.53%<br>(3.03% - 4.04%) | 3.28%<br>(2.88% - 3.76%) | 2.73%<br>(2.38% - 3.11%) | 2.54%<br>(2.19% - 2.95%) | 0.10%<br>(0.03% - 0.22%) | 0.13%<br>(0.05% - 0.24%) | 0.08%<br>(0.02% - 0.17%) | 0.06%<br>(0.01% - 0.14%) | 0.00%<br>(0.00% - 0.00%) | 0.00%<br>(0.00% - 0.00%) | 0.00%<br>(0.00% - 0.00%) | 0.00%<br>(0.00% - 0.00%) |
| Pennsylvania   | 3.54%<br>(3.06% - 4.09%) | 3.27%<br>(2.87% - 3.73%) | 2.71%<br>(2.38% - 3.10%) | 2.54%<br>(2.20% - 2.96%) | 0.10%<br>(0.02% - 0.21%) | 0.13%<br>(0.05% - 0.22%) | 0.07%<br>(0.02% - 0.15%) | 0.05%<br>(0.01% - 0.14%) | 0.00%<br>(0.00% - 0.00%) | 0.00%<br>(0.00% - 0.00%) | 0.00%<br>(0.00% - 0.00%) | 0.00%<br>(0.00% - 0.00%) |

Table S8a. Estimated overall, severe, and extreme **stunting** prevalence (%) in children under 5 years, both sexes, in 1990, 2000, 2010, and 2020.

| Location                      | Total                       |                             |                             |                             | Severe                   |                          |                          |                          | Extreme                  |                          |                          |                          |
|-------------------------------|-----------------------------|-----------------------------|-----------------------------|-----------------------------|--------------------------|--------------------------|--------------------------|--------------------------|--------------------------|--------------------------|--------------------------|--------------------------|
|                               | 1990                        | 2000                        | 2010                        | 2020                        | 1990                     | 2000                     | 2010                     | 2020                     | 1990                     | 2000                     | 2010                     | 2020                     |
| <i>Rhode Island</i>           | 3.38%<br>(2.93% - 3.95%)    | 3.17%<br>(2.74% - 3.63%)    | 2.61%<br>(2.27% - 3.02%)    | 2.44%<br>(2.10% - 2.82%)    | 0.09%<br>(0.02% - 0.20%) | 0.13%<br>(0.05% - 0.24%) | 0.07%<br>(0.02% - 0.15%) | 0.06%<br>(0.01% - 0.13%) | 0.00%<br>(0.00% - 0.00%) | 0.00%<br>(0.00% - 0.00%) | 0.00%<br>(0.00% - 0.00%) | 0.00%<br>(0.00% - 0.00%) |
| <i>South Carolina</i>         | 3.97%<br>(3.41% - 4.60%)    | 3.64%<br>(3.15% - 4.17%)    | 2.98%<br>(2.58% - 3.44%)    | 2.80%<br>(2.40% - 3.27%)    | 0.09%<br>(0.02% - 0.22%) | 0.13%<br>(0.05% - 0.24%) | 0.07%<br>(0.02% - 0.17%) | 0.06%<br>(0.01% - 0.14%) | 0.00%<br>(0.00% - 0.00%) | 0.00%<br>(0.00% - 0.00%) | 0.00%<br>(0.00% - 0.00%) | 0.00%<br>(0.00% - 0.00%) |
| <i>South Dakota</i>           | 3.66%<br>(3.17% - 4.26%)    | 3.40%<br>(2.96% - 3.87%)    | 2.83%<br>(2.47% - 3.28%)    | 2.66%<br>(2.30% - 3.09%)    | 0.10%<br>(0.02% - 0.23%) | 0.13%<br>(0.05% - 0.24%) | 0.07%<br>(0.02% - 0.16%) | 0.06%<br>(0.01% - 0.13%) | 0.00%<br>(0.00% - 0.00%) | 0.00%<br>(0.00% - 0.00%) | 0.00%<br>(0.00% - 0.00%) | 0.00%<br>(0.00% - 0.00%) |
| <i>Tennessee</i>              | 3.86%<br>(3.33% - 4.51%)    | 3.58%<br>(3.10% - 4.07%)    | 3.09%<br>(2.70% - 3.53%)    | 2.78%<br>(2.40% - 3.22%)    | 0.10%<br>(0.02% - 0.23%) | 0.13%<br>(0.05% - 0.25%) | 0.07%<br>(0.01% - 0.16%) | 0.06%<br>(0.01% - 0.14%) | 0.00%<br>(0.00% - 0.00%) | 0.00%<br>(0.00% - 0.00%) | 0.00%<br>(0.00% - 0.00%) | 0.00%<br>(0.00% - 0.00%) |
| <i>Texas</i>                  | 3.82%<br>(3.33% - 4.40%)    | 3.58%<br>(3.13% - 4.08%)    | 2.88%<br>(2.52% - 3.29%)    | 2.67%<br>(2.32% - 3.06%)    | 0.10%<br>(0.02% - 0.20%) | 0.13%<br>(0.06% - 0.26%) | 0.07%<br>(0.02% - 0.15%) | 0.05%<br>(0.01% - 0.14%) | 0.00%<br>(0.00% - 0.00%) | 0.00%<br>(0.00% - 0.00%) | 0.00%<br>(0.00% - 0.00%) | 0.00%<br>(0.00% - 0.00%) |
| <i>Utah</i>                   | 3.77%<br>(3.22% - 4.38%)    | 3.50%<br>(3.04% - 3.97%)    | 2.84%<br>(2.47% - 3.25%)    | 2.67%<br>(2.30% - 3.13%)    | 0.10%<br>(0.02% - 0.23%) | 0.14%<br>(0.06% - 0.25%) | 0.08%<br>(0.02% - 0.17%) | 0.06%<br>(0.01% - 0.15%) | 0.00%<br>(0.00% - 0.00%) | 0.00%<br>(0.00% - 0.00%) | 0.00%<br>(0.00% - 0.00%) | 0.00%<br>(0.00% - 0.00%) |
| <i>Vermont</i>                | 3.47%<br>(2.96% - 4.01%)    | 3.21%<br>(2.77% - 3.70%)    | 2.64%<br>(2.30% - 3.05%)    | 2.47%<br>(2.11% - 2.86%)    | 0.09%<br>(0.02% - 0.21%) | 0.13%<br>(0.05% - 0.24%) | 0.07%<br>(0.02% - 0.17%) | 0.06%<br>(0.01% - 0.13%) | 0.00%<br>(0.00% - 0.00%) | 0.00%<br>(0.00% - 0.00%) | 0.00%<br>(0.00% - 0.00%) | 0.00%<br>(0.00% - 0.00%) |
| <i>Virginia</i>               | 3.55%<br>(3.07% - 4.11%)    | 3.28%<br>(2.86% - 3.77%)    | 2.65%<br>(2.32% - 3.05%)    | 2.50%<br>(2.13% - 2.89%)    | 0.09%<br>(0.02% - 0.20%) | 0.13%<br>(0.05% - 0.24%) | 0.07%<br>(0.02% - 0.15%) | 0.06%<br>(0.01% - 0.13%) | 0.00%<br>(0.00% - 0.00%) | 0.00%<br>(0.00% - 0.00%) | 0.00%<br>(0.00% - 0.00%) | 0.00%<br>(0.00% - 0.00%) |
| <i>Washington</i>             | 3.48%<br>(3.00% - 4.05%)    | 3.22%<br>(2.82% - 3.70%)    | 2.66%<br>(2.29% - 3.04%)    | 2.46%<br>(2.10% - 2.89%)    | 0.10%<br>(0.02% - 0.21%) | 0.13%<br>(0.05% - 0.24%) | 0.08%<br>(0.02% - 0.17%) | 0.06%<br>(0.01% - 0.15%) | 0.00%<br>(0.00% - 0.00%) | 0.00%<br>(0.00% - 0.00%) | 0.00%<br>(0.00% - 0.00%) | 0.00%<br>(0.00% - 0.00%) |
| <i>West Virginia</i>          | 3.86%<br>(3.33% - 4.44%)    | 3.61%<br>(3.15% - 4.14%)    | 3.08%<br>(2.68% - 3.50%)    | 2.86%<br>(2.45% - 3.36%)    | 0.10%<br>(0.02% - 0.24%) | 0.13%<br>(0.05% - 0.24%) | 0.07%<br>(0.02% - 0.16%) | 0.06%<br>(0.01% - 0.14%) | 0.00%<br>(0.00% - 0.00%) | 0.00%<br>(0.00% - 0.00%) | 0.00%<br>(0.00% - 0.00%) | 0.00%<br>(0.00% - 0.00%) |
| <i>Wisconsin</i>              | 3.41%<br>(2.97% - 3.94%)    | 3.24%<br>(2.83% - 3.73%)    | 2.70%<br>(2.33% - 3.12%)    | 2.55%<br>(2.18% - 2.99%)    | 0.10%<br>(0.02% - 0.22%) | 0.13%<br>(0.05% - 0.25%) | 0.08%<br>(0.02% - 0.17%) | 0.06%<br>(0.01% - 0.14%) | 0.00%<br>(0.00% - 0.00%) | 0.00%<br>(0.00% - 0.00%) | 0.00%<br>(0.00% - 0.00%) | 0.00%<br>(0.00% - 0.00%) |
| <i>Wyoming</i>                | 3.63%<br>(3.14% - 4.25%)    | 3.45%<br>(2.98% - 3.95%)    | 2.81%<br>(2.43% - 3.21%)    | 2.60%<br>(2.24% - 3.03%)    | 0.10%<br>(0.02% - 0.22%) | 0.13%<br>(0.04% - 0.24%) | 0.07%<br>(0.02% - 0.16%) | 0.05%<br>(0.01% - 0.13%) | 0.00%<br>(0.00% - 0.00%) | 0.00%<br>(0.00% - 0.00%) | 0.00%<br>(0.00% - 0.00%) | 0.00%<br>(0.00% - 0.00%) |
| <i>Greenland</i>              | 5.04%<br>(4.55% - 5.61%)    | 4.49%<br>(4.03% - 5.01%)    | 3.53%<br>(3.18% - 3.90%)    | 3.12%<br>(2.80% - 3.46%)    | 0.03%<br>(0.00% - 0.10%) | 0.06%<br>(0.01% - 0.14%) | 0.02%<br>(0.00% - 0.07%) | 0.03%<br>(0.00% - 0.08%) | 0.00%<br>(0.00% - 0.00%) | 0.00%<br>(0.00% - 0.00%) | 0.00%<br>(0.00% - 0.00%) | 0.00%<br>(0.00% - 0.00%) |
| <b>Southern Latin America</b> | 10.36%<br>(9.73% - 11.04%)  | 8.89%<br>(8.43% - 9.43%)    | 7.21%<br>(6.73% - 7.74%)    | 6.61%<br>(6.07% - 7.13%)    | 1.87%<br>(1.59% - 2.19%) | 1.61%<br>(1.41% - 1.83%) | 1.15%<br>(0.97% - 1.35%) | 1.05%<br>(0.86% - 1.26%) | 0.10%<br>(0.06% - 0.15%) | 0.07%<br>(0.05% - 0.10%) | 0.03%<br>(0.01% - 0.05%) | 0.02%<br>(0.01% - 0.04%) |
| <i>Argentina</i>              | 12.76%<br>(11.88% - 13.74%) | 10.71%<br>(10.03% - 11.47%) | 8.51%<br>(7.86% - 9.25%)    | 7.82%<br>(7.08% - 8.54%)    | 2.44%<br>(2.02% - 2.93%) | 2.02%<br>(1.74% - 2.35%) | 1.41%<br>(1.16% - 1.69%) | 1.28%<br>(1.02% - 1.57%) | 0.10%<br>(0.04% - 0.18%) | 0.06%<br>(0.03% - 0.11%) | 0.02%<br>(0.00% - 0.04%) | 0.01%<br>(0.00% - 0.03%) |
| <i>Chile</i>                  | 3.50%<br>(3.11% - 3.94%)    | 2.76%<br>(2.59% - 2.95%)    | 2.37%<br>(2.22% - 2.56%)    | 1.97%<br>(1.78% - 2.19%)    | 0.02%<br>(0.00% - 0.07%) | 0.01%<br>(0.00% - 0.04%) | 0.02%<br>(0.01% - 0.05%) | 0.02%<br>(0.00% - 0.05%) | 0.00%<br>(0.00% - 0.00%) | 0.00%<br>(0.00% - 0.00%) | 0.00%<br>(0.00% - 0.00%) | 0.00%<br>(0.00% - 0.00%) |
| <i>Uruguay</i>                | 16.20%<br>(15.21% - 17.15%) | 14.07%<br>(13.08% - 15.05%) | 12.58%<br>(11.54% - 13.65%) | 11.37%<br>(10.33% - 12.40%) | 4.44%<br>(3.82% - 5.09%) | 3.66%<br>(3.10% - 4.21%) | 3.02%<br>(2.50% - 3.64%) | 2.69%<br>(2.20% - 3.23%) | 0.60%<br>(0.41% - 0.82%) | 0.44%<br>(0.28% - 0.62%) | 0.29%<br>(0.15% - 0.45%) | 0.23%<br>(0.12% - 0.39%) |
| <b>Western Europe</b>         | 1.88%<br>(1.82% - 1.95%)    | 1.41%<br>(1.36% - 1.46%)    | 1.30%<br>(1.26% - 1.34%)    | 1.22%<br>(1.18% - 1.26%)    | 0.04%<br>(0.03% - 0.04%) | 0.02%<br>(0.02% - 0.03%) | 0.02%<br>(0.02% - 0.03%) | 0.02%<br>(0.02% - 0.03%) | 0.00%<br>(0.00% - 0.00%) | 0.00%<br>(0.00% - 0.00%) | 0.00%<br>(0.00% - 0.00%) | 0.00%<br>(0.00% - 0.00%) |
| <i>Monaco</i>                 | 1.38%<br>(1.25% - 1.53%)    | 1.11%<br>(1.00% - 1.23%)    | 1.10%<br>(1.00% - 1.23%)    | 1.05%<br>(0.94% - 1.16%)    | 0.02%<br>(0.01% - 0.04%) | 0.01%<br>(0.00% - 0.02%) | 0.01%<br>(0.01% - 0.02%) | 0.01%<br>(0.01% - 0.02%) | 0.00%<br>(0.00% - 0.00%) | 0.00%<br>(0.00% - 0.00%) | 0.00%<br>(0.00% - 0.00%) | 0.00%<br>(0.00% - 0.00%) |
| <i>San Marino</i>             | 1.50%<br>(1.35% - 1.66%)    | 1.23%<br>(1.11% - 1.36%)    | 1.23%<br>(1.07% - 1.33%)    | 1.23%<br>(1.10% - 1.37%)    | 0.03%<br>(0.01% - 0.04%) | 0.02%<br>(0.01% - 0.03%) | 0.02%<br>(0.01% - 0.03%) | 0.02%<br>(0.01% - 0.03%) | 0.00%<br>(0.00% - 0.00%) | 0.00%<br>(0.00% - 0.00%) | 0.00%<br>(0.00% - 0.00%) | 0.00%<br>(0.00% - 0.00%) |
| <i>Andorra</i>                | 1.55%<br>(1.40% - 1.72%)    | 1.20%<br>(1.08% - 1.34%)    | 1.12%<br>(1.00% - 1.24%)    | 1.13%<br>(1.01% - 1.26%)    | 0.02%<br>(0.01% - 0.04%) | 0.01%<br>(0.01% - 0.02%) | 0.01%<br>(0.01% - 0.02%) | 0.02%<br>(0.01% - 0.03%) | 0.00%<br>(0.00% - 0.00%) | 0.00%<br>(0.00% - 0.00%) | 0.00%<br>(0.00% - 0.00%) | 0.00%<br>(0.00% - 0.00%) |
| <i>Austria</i>                | 1.97%<br>(1.78% - 2.20%)    | 1.47%<br>(1.31% - 1.64%)    | 1.35%<br>(1.21% - 1.51%)    | 1.25%<br>(1.12% - 1.40%)    | 0.04%<br>(0.02% - 0.06%) | 0.02%<br>(0.01% - 0.03%) | 0.02%<br>(0.01% - 0.03%) | 0.02%<br>(0.01% - 0.03%) | 0.00%<br>(0.00% - 0.00%) | 0.00%<br>(0.00% - 0.00%) | 0.00%<br>(0.00% - 0.00%) | 0.00%<br>(0.00% - 0.00%) |

Table S8a. Estimated overall, severe, and extreme **stunting** prevalence (%) in children under 5 years, both sexes, in 1990, 2000, 2010, and 2020.

| Location                             | Total                    |                          |                          |                          | Severe                   |                          |                          |                          | Extreme                  |                          |                          |                          |
|--------------------------------------|--------------------------|--------------------------|--------------------------|--------------------------|--------------------------|--------------------------|--------------------------|--------------------------|--------------------------|--------------------------|--------------------------|--------------------------|
|                                      | 1990                     | 2000                     | 2010                     | 2020                     | 1990                     | 2000                     | 2010                     | 2020                     | 1990                     | 2000                     | 2010                     | 2020                     |
| Belgium                              | 1.87%<br>(1.68% - 2.08%) | 1.45%<br>(1.30% - 1.62%) | 1.29%<br>(1.15% - 1.44%) | 1.21%<br>(1.09% - 1.35%) | 0.03%<br>(0.02% - 0.05%) | 0.02%<br>(0.01% - 0.03%) | 0.02%<br>(0.01% - 0.03%) | 0.02%<br>(0.01% - 0.03%) | 0.00%<br>(0.00% - 0.00%) | 0.00%<br>(0.00% - 0.00%) | 0.00%<br>(0.00% - 0.00%) | 0.00%<br>(0.00% - 0.00%) |
| Cyprus                               | 2.41%<br>(2.17% - 2.67%) | 1.78%<br>(1.60% - 1.98%) | 1.59%<br>(1.44% - 1.78%) | 1.50%<br>(1.36% - 1.68%) | 0.05%<br>(0.02% - 0.07%) | 0.03%<br>(0.01% - 0.04%) | 0.03%<br>(0.02% - 0.05%) | 0.03%<br>(0.02% - 0.05%) | 0.00%<br>(0.00% - 0.00%) | 0.00%<br>(0.00% - 0.00%) | 0.00%<br>(0.00% - 0.00%) | 0.00%<br>(0.00% - 0.00%) |
| Denmark                              | 1.96%<br>(1.76% - 2.18%) | 1.48%<br>(1.32% - 1.66%) | 1.41%<br>(1.27% - 1.57%) | 1.32%<br>(1.19% - 1.46%) | 0.04%<br>(0.02% - 0.06%) | 0.02%<br>(0.01% - 0.03%) | 0.02%<br>(0.01% - 0.04%) | 0.02%<br>(0.01% - 0.04%) | 0.00%<br>(0.00% - 0.00%) | 0.00%<br>(0.00% - 0.00%) | 0.00%<br>(0.00% - 0.00%) | 0.00%<br>(0.00% - 0.00%) |
| Finland                              | 1.96%<br>(1.76% - 2.16%) | 1.53%<br>(1.38% - 1.71%) | 1.41%<br>(1.28% - 1.57%) | 1.36%<br>(1.23% - 1.52%) | 0.04%<br>(0.02% - 0.06%) | 0.02%<br>(0.01% - 0.04%) | 0.03%<br>(0.01% - 0.04%) | 0.03%<br>(0.01% - 0.04%) | 0.00%<br>(0.00% - 0.00%) | 0.00%<br>(0.00% - 0.00%) | 0.00%<br>(0.00% - 0.00%) | 0.00%<br>(0.00% - 0.00%) |
| France                               | 1.91%<br>(1.72% - 2.12%) | 1.44%<br>(1.30% - 1.61%) | 1.34%<br>(1.22% - 1.48%) | 1.25%<br>(1.12% - 1.39%) | 0.03%<br>(0.02% - 0.05%) | 0.02%<br>(0.01% - 0.03%) | 0.02%<br>(0.01% - 0.03%) | 0.02%<br>(0.01% - 0.03%) | 0.00%<br>(0.00% - 0.00%) | 0.00%<br>(0.00% - 0.00%) | 0.00%<br>(0.00% - 0.00%) | 0.00%<br>(0.00% - 0.00%) |
| Germany                              | 1.44%<br>(1.30% - 1.59%) | 1.17%<br>(1.06% - 1.29%) | 1.09%<br>(0.99% - 1.19%) | 1.04%<br>(0.95% - 1.14%) | 0.03%<br>(0.01% - 0.04%) | 0.02%<br>(0.01% - 0.04%) | 0.03%<br>(0.01% - 0.04%) | 0.02%<br>(0.01% - 0.04%) | 0.00%<br>(0.00% - 0.00%) | 0.00%<br>(0.00% - 0.00%) | 0.00%<br>(0.00% - 0.00%) | 0.00%<br>(0.00% - 0.00%) |
| Greece                               | 2.68%<br>(2.39% - 2.97%) | 2.28%<br>(2.05% - 2.50%) | 2.13%<br>(1.92% - 2.35%) | 2.14%<br>(1.91% - 2.39%) | 0.18%<br>(0.11% - 0.26%) | 0.15%<br>(0.09% - 0.21%) | 0.13%<br>(0.08% - 0.19%) | 0.13%<br>(0.08% - 0.20%) | 0.00%<br>(0.00% - 0.00%) | 0.00%<br>(0.00% - 0.00%) | 0.00%<br>(0.00% - 0.00%) | 0.00%<br>(0.00% - 0.00%) |
| Iceland                              | 1.65%<br>(1.49% - 1.82%) | 1.37%<br>(1.22% - 1.52%) | 1.33%<br>(1.21% - 1.46%) | 1.27%<br>(1.15% - 1.41%) | 0.03%<br>(0.02% - 0.05%) | 0.02%<br>(0.01% - 0.03%) | 0.02%<br>(0.01% - 0.04%) | 0.02%<br>(0.01% - 0.04%) | 0.00%<br>(0.00% - 0.00%) | 0.00%<br>(0.00% - 0.00%) | 0.00%<br>(0.00% - 0.00%) | 0.00%<br>(0.00% - 0.00%) |
| Ireland                              | 1.93%<br>(1.74% - 2.16%) | 1.48%<br>(1.34% - 1.65%) | 1.29%<br>(1.17% - 1.43%) | 1.16%<br>(1.04% - 1.29%) | 0.03%<br>(0.01% - 0.05%) | 0.02%<br>(0.01% - 0.03%) | 0.02%<br>(0.01% - 0.03%) | 0.02%<br>(0.01% - 0.03%) | 0.00%<br>(0.00% - 0.00%) | 0.00%<br>(0.00% - 0.00%) | 0.00%<br>(0.00% - 0.00%) | 0.00%<br>(0.00% - 0.00%) |
| Israel                               | 1.79%<br>(1.61% - 2.00%) | 1.38%<br>(1.24% - 1.54%) | 1.29%<br>(1.16% - 1.42%) | 1.21%<br>(1.08% - 1.35%) | 0.03%<br>(0.01% - 0.05%) | 0.01%<br>(0.00% - 0.03%) | 0.02%<br>(0.01% - 0.03%) | 0.02%<br>(0.01% - 0.03%) | 0.00%<br>(0.00% - 0.00%) | 0.00%<br>(0.00% - 0.00%) | 0.00%<br>(0.00% - 0.00%) | 0.00%<br>(0.00% - 0.00%) |
| Italy                                | 1.96%<br>(1.77% - 2.17%) | 1.40%<br>(1.25% - 1.55%) | 1.26%<br>(1.13% - 1.39%) | 1.21%<br>(1.09% - 1.36%) | 0.04%<br>(0.02% - 0.06%) | 0.02%<br>(0.01% - 0.03%) | 0.02%<br>(0.01% - 0.03%) | 0.02%<br>(0.01% - 0.03%) | 0.00%<br>(0.00% - 0.00%) | 0.00%<br>(0.00% - 0.00%) | 0.00%<br>(0.00% - 0.00%) | 0.00%<br>(0.00% - 0.00%) |
| <i>Piemonte</i>                      | 1.85%<br>(1.59% - 2.14%) | 1.35%<br>(1.18% - 1.58%) | 1.23%<br>(1.06% - 1.42%) | 1.18%<br>(1.02% - 1.36%) | 0.04%<br>(0.01% - 0.06%) | 0.02%<br>(0.00% - 0.04%) | 0.02%<br>(0.01% - 0.04%) | 0.02%<br>(0.01% - 0.04%) | 0.00%<br>(0.00% - 0.00%) | 0.00%<br>(0.00% - 0.00%) | 0.00%<br>(0.00% - 0.00%) | 0.00%<br>(0.00% - 0.00%) |
| <i>Valle d'Aosta</i>                 | 1.87%<br>(1.60% - 2.18%) | 1.37%<br>(1.18% - 1.58%) | 1.23%<br>(1.05% - 1.42%) | 1.18%<br>(1.02% - 1.39%) | 0.04%<br>(0.01% - 0.07%) | 0.02%<br>(0.00% - 0.04%) | 0.02%<br>(0.00% - 0.04%) | 0.02%<br>(0.00% - 0.04%) | 0.00%<br>(0.00% - 0.00%) | 0.00%<br>(0.00% - 0.00%) | 0.00%<br>(0.00% - 0.00%) | 0.00%<br>(0.00% - 0.00%) |
| <i>Liguria</i>                       | 1.83%<br>(1.59% - 2.11%) | 1.34%<br>(1.15% - 1.57%) | 1.22%<br>(1.04% - 1.42%) | 1.18%<br>(1.02% - 1.39%) | 0.04%<br>(0.01% - 0.07%) | 0.02%<br>(0.00% - 0.04%) | 0.02%<br>(0.01% - 0.04%) | 0.02%<br>(0.01% - 0.04%) | 0.00%<br>(0.00% - 0.00%) | 0.00%<br>(0.00% - 0.00%) | 0.00%<br>(0.00% - 0.00%) | 0.00%<br>(0.00% - 0.00%) |
| <i>Lombardia</i>                     | 1.75%<br>(1.52% - 2.02%) | 1.29%<br>(1.12% - 1.47%) | 1.18%<br>(1.02% - 1.35%) | 1.14%<br>(0.99% - 1.31%) | 0.03%<br>(0.01% - 0.06%) | 0.02%<br>(0.01% - 0.03%) | 0.02%<br>(0.01% - 0.03%) | 0.02%<br>(0.01% - 0.03%) | 0.00%<br>(0.00% - 0.00%) | 0.00%<br>(0.00% - 0.00%) | 0.00%<br>(0.00% - 0.00%) | 0.00%<br>(0.00% - 0.00%) |
| <i>Provincia autonoma di Bolzano</i> | 1.78%<br>(1.53% - 2.07%) | 1.29%<br>(1.10% - 1.50%) | 1.18%<br>(1.03% - 1.37%) | 1.14%<br>(0.97% - 1.35%) | 0.03%<br>(0.01% - 0.06%) | 0.02%<br>(0.00% - 0.04%) | 0.02%<br>(0.00% - 0.04%) | 0.02%<br>(0.01% - 0.04%) | 0.00%<br>(0.00% - 0.00%) | 0.00%<br>(0.00% - 0.00%) | 0.00%<br>(0.00% - 0.00%) | 0.00%<br>(0.00% - 0.00%) |
| <i>Provincia autonoma di Trento</i>  | 1.75%<br>(1.51% - 2.03%) | 1.30%<br>(1.11% - 1.52%) | 1.19%<br>(1.03% - 1.39%) | 1.15%<br>(0.99% - 1.33%) | 0.03%<br>(0.01% - 0.06%) | 0.02%<br>(0.00% - 0.04%) | 0.02%<br>(0.01% - 0.04%) | 0.02%<br>(0.01% - 0.03%) | 0.00%<br>(0.00% - 0.00%) | 0.00%<br>(0.00% - 0.00%) | 0.00%<br>(0.00% - 0.00%) | 0.00%<br>(0.00% - 0.00%) |
| <i>Veneto</i>                        | 1.82%<br>(1.56% - 2.12%) | 1.33%<br>(1.15% - 1.51%) | 1.21%<br>(1.05% - 1.39%) | 1.17%<br>(1.01% - 1.36%) | 0.04%<br>(0.01% - 0.06%) | 0.02%<br>(0.00% - 0.04%) | 0.02%<br>(0.01% - 0.04%) | 0.02%<br>(0.01% - 0.04%) | 0.00%<br>(0.00% - 0.00%) | 0.00%<br>(0.00% - 0.00%) | 0.00%<br>(0.00% - 0.00%) | 0.00%<br>(0.00% - 0.00%) |
| <i>Friuli-Venezia Giulia</i>         | 1.84%<br>(1.58% - 2.14%) | 1.34%<br>(1.15% - 1.55%) | 1.22%<br>(1.04% - 1.41%) | 1.18%<br>(1.01% - 1.39%) | 0.04%<br>(0.01% - 0.07%) | 0.02%<br>(0.01% - 0.04%) | 0.02%<br>(0.01% - 0.04%) | 0.02%<br>(0.00% - 0.04%) | 0.00%<br>(0.00% - 0.00%) | 0.00%<br>(0.00% - 0.00%) | 0.00%<br>(0.00% - 0.00%) | 0.00%<br>(0.00% - 0.00%) |
| <i>Emilia-Romagna</i>                | 1.86%<br>(1.61% - 2.13%) | 1.31%<br>(1.13% - 1.51%) | 1.20%<br>(1.04% - 1.38%) | 1.15%<br>(1.00% - 1.33%) | 0.04%<br>(0.01% - 0.07%) | 0.02%<br>(0.01% - 0.04%) | 0.02%<br>(0.01% - 0.04%) | 0.02%<br>(0.01% - 0.03%) | 0.00%<br>(0.00% - 0.00%) | 0.00%<br>(0.00% - 0.00%) | 0.00%<br>(0.00% - 0.00%) | 0.00%<br>(0.00% - 0.00%) |
| <i>Toscana</i>                       | 1.82%<br>(1.56% - 2.10%) | 1.34%<br>(1.15% - 1.54%) | 1.21%<br>(1.05% - 1.40%) | 1.17%<br>(1.01% - 1.35%) | 0.04%<br>(0.01% - 0.06%) | 0.02%<br>(0.01% - 0.04%) | 0.02%<br>(0.01% - 0.04%) | 0.02%<br>(0.01% - 0.03%) | 0.00%<br>(0.00% - 0.00%) | 0.00%<br>(0.00% - 0.00%) | 0.00%<br>(0.00% - 0.00%) | 0.00%<br>(0.00% - 0.00%) |
| <i>Umbria</i>                        | 1.85%<br>(1.58% - 2.14%) | 1.36%<br>(1.18% - 1.59%) | 1.24%<br>(1.07% - 1.44%) | 1.21%<br>(1.03% - 1.42%) | 0.04%<br>(0.01% - 0.07%) | 0.02%<br>(0.01% - 0.04%) | 0.02%<br>(0.01% - 0.04%) | 0.02%<br>(0.01% - 0.04%) | 0.00%<br>(0.00% - 0.00%) | 0.00%<br>(0.00% - 0.00%) | 0.00%<br>(0.00% - 0.00%) | 0.00%<br>(0.00% - 0.00%) |

Table S8a. Estimated overall, severe, and extreme **stunting** prevalence (%) in children under 5 years, both sexes, in 1990, 2000, 2010, and 2020.

| Location                       | Total                    |                          |                          |                          | Severe                   |                          |                          |                          | Extreme                  |                          |                          |                          |
|--------------------------------|--------------------------|--------------------------|--------------------------|--------------------------|--------------------------|--------------------------|--------------------------|--------------------------|--------------------------|--------------------------|--------------------------|--------------------------|
|                                | 1990                     | 2000                     | 2010                     | 2020                     | 1990                     | 2000                     | 2010                     | 2020                     | 1990                     | 2000                     | 2010                     | 2020                     |
| <i>Marche</i>                  | 1.88%<br>(1.62% - 2.16%) | 1.36%<br>(1.17% - 1.58%) | 1.24%<br>(1.07% - 1.44%) | 1.20%<br>(1.03% - 1.40%) | 0.04%<br>(0.02% - 0.07%) | 0.02%<br>(0.01% - 0.04%) | 0.02%<br>(0.01% - 0.04%) | 0.02%<br>(0.01% - 0.04%) | 0.00%<br>(0.00% - 0.00%) | 0.00%<br>(0.00% - 0.00%) | 0.00%<br>(0.00% - 0.00%) | 0.00%<br>(0.00% - 0.00%) |
| <i>Lazio</i>                   | 1.80%<br>(1.56% - 2.07%) | 1.32%<br>(1.13% - 1.53%) | 1.20%<br>(1.04% - 1.39%) | 1.16%<br>(1.01% - 1.35%) | 0.03%<br>(0.01% - 0.06%) | 0.02%<br>(0.00% - 0.04%) | 0.02%<br>(0.00% - 0.04%) | 0.02%<br>(0.01% - 0.03%) | 0.00%<br>(0.00% - 0.00%) | 0.00%<br>(0.00% - 0.00%) | 0.00%<br>(0.00% - 0.00%) | 0.00%<br>(0.00% - 0.00%) |
| <i>Abruzzo</i>                 | 1.89%<br>(1.61% - 2.21%) | 1.37%<br>(1.18% - 1.60%) | 1.27%<br>(1.08% - 1.47%) | 1.22%<br>(1.05% - 1.41%) | 0.04%<br>(0.01% - 0.07%) | 0.02%<br>(0.01% - 0.04%) | 0.02%<br>(0.01% - 0.04%) | 0.02%<br>(0.01% - 0.04%) | 0.00%<br>(0.00% - 0.00%) | 0.00%<br>(0.00% - 0.00%) | 0.00%<br>(0.00% - 0.00%) | 0.00%<br>(0.00% - 0.00%) |
| <i>Molise</i>                  | 2.01%<br>(1.72% - 2.33%) | 1.44%<br>(1.24% - 1.68%) | 1.31%<br>(1.12% - 1.51%) | 1.27%<br>(1.08% - 1.50%) | 0.04%<br>(0.01% - 0.07%) | 0.02%<br>(0.00% - 0.04%) | 0.02%<br>(0.01% - 0.04%) | 0.02%<br>(0.01% - 0.04%) | 0.00%<br>(0.00% - 0.00%) | 0.00%<br>(0.00% - 0.00%) | 0.00%<br>(0.00% - 0.00%) | 0.00%<br>(0.00% - 0.00%) |
| <i>Campania</i>                | 2.16%<br>(1.87% - 2.48%) | 1.53%<br>(1.33% - 1.77%) | 1.36%<br>(1.17% - 1.57%) | 1.32%<br>(1.14% - 1.53%) | 0.04%<br>(0.02% - 0.07%) | 0.02%<br>(0.01% - 0.04%) | 0.02%<br>(0.01% - 0.04%) | 0.02%<br>(0.01% - 0.04%) | 0.00%<br>(0.00% - 0.00%) | 0.00%<br>(0.00% - 0.00%) | 0.00%<br>(0.00% - 0.00%) | 0.00%<br>(0.00% - 0.00%) |
| <i>Puglia</i>                  | 2.13%<br>(1.84% - 2.43%) | 1.50%<br>(1.30% - 1.75%) | 1.35%<br>(1.17% - 1.55%) | 1.30%<br>(1.13% - 1.54%) | 0.04%<br>(0.02% - 0.07%) | 0.02%<br>(0.01% - 0.04%) | 0.02%<br>(0.01% - 0.04%) | 0.02%<br>(0.01% - 0.04%) | 0.00%<br>(0.00% - 0.00%) | 0.00%<br>(0.00% - 0.00%) | 0.00%<br>(0.00% - 0.00%) | 0.00%<br>(0.00% - 0.00%) |
| <i>Basilicata</i>              | 2.07%<br>(1.77% - 2.42%) | 1.46%<br>(1.25% - 1.70%) | 1.33%<br>(1.15% - 1.54%) | 1.28%<br>(1.11% - 1.51%) | 0.04%<br>(0.01% - 0.07%) | 0.02%<br>(0.01% - 0.04%) | 0.02%<br>(0.01% - 0.04%) | 0.02%<br>(0.01% - 0.04%) | 0.00%<br>(0.00% - 0.00%) | 0.00%<br>(0.00% - 0.00%) | 0.00%<br>(0.00% - 0.00%) | 0.00%<br>(0.00% - 0.00%) |
| <i>Calabria</i>                | 2.12%<br>(1.83% - 2.49%) | 1.51%<br>(1.29% - 1.76%) | 1.36%<br>(1.17% - 1.58%) | 1.32%<br>(1.14% - 1.55%) | 0.04%<br>(0.01% - 0.07%) | 0.02%<br>(0.01% - 0.04%) | 0.02%<br>(0.01% - 0.04%) | 0.02%<br>(0.01% - 0.04%) | 0.00%<br>(0.00% - 0.00%) | 0.00%<br>(0.00% - 0.00%) | 0.00%<br>(0.00% - 0.00%) | 0.00%<br>(0.00% - 0.00%) |
| <i>Sicilia</i>                 | 2.19%<br>(1.90% - 2.51%) | 1.53%<br>(1.32% - 1.77%) | 1.36%<br>(1.17% - 1.58%) | 1.33%<br>(1.15% - 1.53%) | 0.04%<br>(0.01% - 0.07%) | 0.02%<br>(0.01% - 0.04%) | 0.02%<br>(0.01% - 0.04%) | 0.02%<br>(0.01% - 0.04%) | 0.00%<br>(0.00% - 0.00%) | 0.00%<br>(0.00% - 0.00%) | 0.00%<br>(0.00% - 0.00%) | 0.00%<br>(0.00% - 0.00%) |
| <i>Sardegna</i>                | 2.02%<br>(1.73% - 2.34%) | 1.46%<br>(1.24% - 1.70%) | 1.32%<br>(1.14% - 1.52%) | 1.27%<br>(1.08% - 1.48%) | 0.04%<br>(0.01% - 0.07%) | 0.02%<br>(0.01% - 0.04%) | 0.02%<br>(0.01% - 0.04%) | 0.02%<br>(0.01% - 0.04%) | 0.00%<br>(0.00% - 0.00%) | 0.00%<br>(0.00% - 0.00%) | 0.00%<br>(0.00% - 0.00%) | 0.00%<br>(0.00% - 0.00%) |
| <i>Luxembourg</i>              | 2.03%<br>(1.82% - 2.25%) | 1.55%<br>(1.40% - 1.74%) | 1.44%<br>(1.30% - 1.59%) | 1.35%<br>(1.22% - 1.50%) | 0.04%<br>(0.02% - 0.06%) | 0.02%<br>(0.01% - 0.04%) | 0.03%<br>(0.02% - 0.04%) | 0.03%<br>(0.02% - 0.04%) | 0.00%<br>(0.00% - 0.00%) | 0.00%<br>(0.00% - 0.00%) | 0.00%<br>(0.00% - 0.00%) | 0.00%<br>(0.00% - 0.00%) |
| <i>Malta</i>                   | 2.21%<br>(2.00% - 2.46%) | 1.65%<br>(1.49% - 1.84%) | 1.55%<br>(1.40% - 1.73%) | 1.37%<br>(1.23% - 1.52%) | 0.04%<br>(0.02% - 0.06%) | 0.02%<br>(0.01% - 0.04%) | 0.03%<br>(0.01% - 0.04%) | 0.02%<br>(0.01% - 0.04%) | 0.00%<br>(0.00% - 0.00%) | 0.00%<br>(0.00% - 0.00%) | 0.00%<br>(0.00% - 0.00%) | 0.00%<br>(0.00% - 0.00%) |
| <i>Netherlands</i>             | 1.50%<br>(1.36% - 1.66%) | 1.42%<br>(1.28% - 1.56%) | 1.31%<br>(1.19% - 1.45%) | 1.28%<br>(1.16% - 1.42%) | 0.05%<br>(0.03% - 0.08%) | 0.05%<br>(0.03% - 0.08%) | 0.05%<br>(0.03% - 0.07%) | 0.05%<br>(0.03% - 0.07%) | 0.00%<br>(0.00% - 0.00%) | 0.00%<br>(0.00% - 0.00%) | 0.00%<br>(0.00% - 0.00%) | 0.00%<br>(0.00% - 0.00%) |
| <i>Norway</i>                  | 1.80%<br>(1.62% - 1.99%) | 1.37%<br>(1.24% - 1.51%) | 1.30%<br>(1.17% - 1.44%) | 1.22%<br>(1.09% - 1.36%) | 0.04%<br>(0.02% - 0.06%) | 0.02%<br>(0.01% - 0.03%) | 0.02%<br>(0.01% - 0.04%) | 0.02%<br>(0.01% - 0.03%) | 0.00%<br>(0.00% - 0.00%) | 0.00%<br>(0.00% - 0.00%) | 0.00%<br>(0.00% - 0.00%) | 0.00%<br>(0.00% - 0.00%) |
| <i>Portugal</i>                | 2.40%<br>(2.16% - 2.66%) | 1.75%<br>(1.57% - 1.95%) | 1.53%<br>(1.38% - 1.70%) | 1.44%<br>(1.30% - 1.59%) | 0.04%<br>(0.02% - 0.06%) | 0.02%<br>(0.01% - 0.04%) | 0.03%<br>(0.01% - 0.04%) | 0.03%<br>(0.01% - 0.04%) | 0.00%<br>(0.00% - 0.00%) | 0.00%<br>(0.00% - 0.00%) | 0.00%<br>(0.00% - 0.00%) | 0.00%<br>(0.00% - 0.00%) |
| <i>Spain</i>                   | 2.44%<br>(2.16% - 2.76%) | 1.31%<br>(1.17% - 1.47%) | 1.15%<br>(1.02% - 1.29%) | 1.12%<br>(0.98% - 1.26%) | 0.03%<br>(0.00% - 0.07%) | 0.00%<br>(0.00% - 0.00%) | 0.00%<br>(0.00% - 0.00%) | 0.00%<br>(0.00% - 0.00%) | 0.00%<br>(0.00% - 0.00%) | 0.00%<br>(0.00% - 0.00%) | 0.00%<br>(0.00% - 0.00%) | 0.00%<br>(0.00% - 0.00%) |
| <i>Sweden</i>                  | 1.76%<br>(1.59% - 1.97%) | 1.37%<br>(1.24% - 1.53%) | 1.28%<br>(1.16% - 1.42%) | 1.22%<br>(1.11% - 1.36%) | 0.04%<br>(0.02% - 0.06%) | 0.02%<br>(0.01% - 0.03%) | 0.02%<br>(0.01% - 0.04%) | 0.02%<br>(0.01% - 0.03%) | 0.00%<br>(0.00% - 0.00%) | 0.00%<br>(0.00% - 0.00%) | 0.00%<br>(0.00% - 0.00%) | 0.00%<br>(0.00% - 0.00%) |
| <i>Sweden except Stockholm</i> | 1.75%<br>(1.58% - 1.98%) | 1.36%<br>(1.22% - 1.53%) | 1.28%<br>(1.14% - 1.43%) | 1.22%<br>(1.10% - 1.36%) | 0.04%<br>(0.02% - 0.06%) | 0.02%<br>(0.01% - 0.03%) | 0.02%<br>(0.01% - 0.04%) | 0.02%<br>(0.01% - 0.03%) | 0.00%<br>(0.00% - 0.00%) | 0.00%<br>(0.00% - 0.00%) | 0.00%<br>(0.00% - 0.00%) | 0.00%<br>(0.00% - 0.00%) |
| <i>Stockholm</i>               | 1.79%<br>(1.54% - 2.08%) | 1.40%<br>(1.19% - 1.64%) | 1.30%<br>(1.11% - 1.51%) | 1.24%<br>(1.07% - 1.45%) | 0.04%<br>(0.02% - 0.08%) | 0.02%<br>(0.01% - 0.05%) | 0.03%<br>(0.01% - 0.05%) | 0.02%<br>(0.01% - 0.04%) | 0.00%<br>(0.00% - 0.00%) | 0.00%<br>(0.00% - 0.00%) | 0.00%<br>(0.00% - 0.00%) | 0.00%<br>(0.00% - 0.00%) |
| <i>Switzerland</i>             | 1.61%<br>(1.46% - 1.79%) | 1.31%<br>(1.17% - 1.46%) | 1.23%<br>(1.11% - 1.37%) | 1.18%<br>(1.06% - 1.32%) | 0.03%<br>(0.02% - 0.05%) | 0.02%<br>(0.01% - 0.03%) | 0.02%<br>(0.01% - 0.03%) | 0.02%<br>(0.01% - 0.03%) | 0.00%<br>(0.00% - 0.00%) | 0.00%<br>(0.00% - 0.00%) | 0.00%<br>(0.00% - 0.00%) | 0.00%<br>(0.00% - 0.00%) |
| <i>United Kingdom</i>          | 1.96%<br>(1.76% - 2.17%) | 1.48%<br>(1.33% - 1.65%) | 1.39%<br>(1.26% - 1.54%) | 1.31%<br>(1.19% - 1.46%) | 0.04%<br>(0.02% - 0.06%) | 0.02%<br>(0.01% - 0.04%) | 0.03%<br>(0.01% - 0.04%) | 0.02%<br>(0.01% - 0.04%) | 0.00%<br>(0.00% - 0.00%) | 0.00%<br>(0.00% - 0.00%) | 0.00%<br>(0.00% - 0.00%) | 0.00%<br>(0.00% - 0.00%) |
| <i>Northern Ireland</i>        | 2.05%<br>(1.72% - 2.43%) | 1.51%<br>(1.27% - 1.79%) | 1.45%<br>(1.23% - 1.74%) | 1.35%<br>(1.14% - 1.60%) | 0.04%<br>(0.01% - 0.09%) | 0.02%<br>(0.01% - 0.05%) | 0.03%<br>(0.01% - 0.06%) | 0.03%<br>(0.01% - 0.05%) | 0.00%<br>(0.00% - 0.00%) | 0.00%<br>(0.00% - 0.00%) | 0.00%<br>(0.00% - 0.00%) | 0.00%<br>(0.00% - 0.00%) |

Table S8a. Estimated overall, severe, and extreme **stunting** prevalence (%) in children under 5 years, both sexes, in 1990, 2000, 2010, and 2020.

| Location                           | Total                       |                             |                             |                             | Severe                      |                             |                          |                          | Extreme                  |                          |                          |                          |
|------------------------------------|-----------------------------|-----------------------------|-----------------------------|-----------------------------|-----------------------------|-----------------------------|--------------------------|--------------------------|--------------------------|--------------------------|--------------------------|--------------------------|
|                                    | 1990                        | 2000                        | 2010                        | 2020                        | 1990                        | 2000                        | 2010                     | 2020                     | 1990                     | 2000                     | 2010                     | 2020                     |
| Scotland                           | 2.03%<br>(1.73% - 2.39%)    | 1.51%<br>(1.28% - 1.81%)    | 1.43%<br>(1.20% - 1.69%)    | 1.34%<br>(1.14% - 1.61%)    | 0.04%<br>(0.02% - 0.09%)    | 0.02%<br>(0.00% - 0.05%)    | 0.03%<br>(0.01% - 0.05%) | 0.02%<br>(0.01% - 0.05%) | 0.00%<br>(0.00% - 0.00%) | 0.00%<br>(0.00% - 0.00%) | 0.00%<br>(0.00% - 0.00%) | 0.00%<br>(0.00% - 0.00%) |
| Wales                              | 2.08%<br>(1.76% - 2.47%)    | 1.57%<br>(1.32% - 1.88%)    | 1.48%<br>(1.25% - 1.76%)    | 1.38%<br>(1.15% - 1.65%)    | 0.05%<br>(0.02% - 0.09%)    | 0.02%<br>(0.01% - 0.06%)    | 0.03%<br>(0.01% - 0.06%) | 0.03%<br>(0.01% - 0.05%) | 0.00%<br>(0.00% - 0.00%) | 0.00%<br>(0.00% - 0.00%) | 0.00%<br>(0.00% - 0.00%) | 0.00%<br>(0.00% - 0.00%) |
| England                            | 1.94%<br>(1.75% - 2.15%)    | 1.48%<br>(1.32% - 1.64%)    | 1.38%<br>(1.24% - 1.53%)    | 1.30%<br>(1.18% - 1.45%)    | 0.04%<br>(0.02% - 0.06%)    | 0.02%<br>(0.01% - 0.04%)    | 0.03%<br>(0.01% - 0.04%) | 0.02%<br>(0.01% - 0.04%) | 0.00%<br>(0.00% - 0.00%) | 0.00%<br>(0.00% - 0.00%) | 0.00%<br>(0.00% - 0.00%) | 0.00%<br>(0.00% - 0.00%) |
| North East England                 | 2.08%<br>(1.82% - 2.42%)    | 1.56%<br>(1.34% - 1.81%)    | 1.43%<br>(1.22% - 1.66%)    | 1.36%<br>(1.17% - 1.58%)    | 0.04%<br>(0.02% - 0.08%)    | 0.02%<br>(0.01% - 0.05%)    | 0.03%<br>(0.01% - 0.05%) | 0.03%<br>(0.01% - 0.05%) | 0.00%<br>(0.00% - 0.00%) | 0.00%<br>(0.00% - 0.00%) | 0.00%<br>(0.00% - 0.00%) | 0.00%<br>(0.00% - 0.00%) |
| North West England                 | 1.98%<br>(1.73% - 2.27%)    | 1.51%<br>(1.31% - 1.74%)    | 1.41%<br>(1.21% - 1.61%)    | 1.34%<br>(1.16% - 1.55%)    | 0.04%<br>(0.02% - 0.07%)    | 0.02%<br>(0.01% - 0.04%)    | 0.03%<br>(0.01% - 0.04%) | 0.02%<br>(0.01% - 0.04%) | 0.00%<br>(0.00% - 0.00%) | 0.00%<br>(0.00% - 0.00%) | 0.00%<br>(0.00% - 0.00%) | 0.00%<br>(0.00% - 0.00%) |
| Yorkshire and the Humber           | 1.99%<br>(1.71% - 2.28%)    | 1.51%<br>(1.30% - 1.77%)    | 1.42%<br>(1.24% - 1.64%)    | 1.34%<br>(1.16% - 1.57%)    | 0.04%<br>(0.02% - 0.08%)    | 0.02%<br>(0.01% - 0.04%)    | 0.03%<br>(0.01% - 0.05%) | 0.02%<br>(0.01% - 0.04%) | 0.00%<br>(0.00% - 0.00%) | 0.00%<br>(0.00% - 0.00%) | 0.00%<br>(0.00% - 0.00%) | 0.00%<br>(0.00% - 0.00%) |
| East Midlands                      | 1.95%<br>(1.70% - 2.25%)    | 1.48%<br>(1.27% - 1.71%)    | 1.40%<br>(1.22% - 1.61%)    | 1.33%<br>(1.15% - 1.54%)    | 0.04%<br>(0.02% - 0.07%)    | 0.02%<br>(0.01% - 0.04%)    | 0.03%<br>(0.01% - 0.05%) | 0.02%<br>(0.01% - 0.04%) | 0.00%<br>(0.00% - 0.00%) | 0.00%<br>(0.00% - 0.00%) | 0.00%<br>(0.00% - 0.00%) | 0.00%<br>(0.00% - 0.00%) |
| West Midlands                      | 2.06%<br>(1.78% - 2.36%)    | 1.56%<br>(1.33% - 1.83%)    | 1.43%<br>(1.25% - 1.64%)    | 1.37%<br>(1.19% - 1.57%)    | 0.04%<br>(0.02% - 0.08%)    | 0.02%<br>(0.01% - 0.04%)    | 0.03%<br>(0.01% - 0.05%) | 0.02%<br>(0.01% - 0.05%) | 0.00%<br>(0.00% - 0.00%) | 0.00%<br>(0.00% - 0.00%) | 0.00%<br>(0.00% - 0.00%) | 0.00%<br>(0.00% - 0.00%) |
| East of England                    | 1.86%<br>(1.61% - 2.14%)    | 1.42%<br>(1.21% - 1.64%)    | 1.34%<br>(1.17% - 1.54%)    | 1.28%<br>(1.11% - 1.46%)    | 0.04%<br>(0.02% - 0.07%)    | 0.02%<br>(0.01% - 0.04%)    | 0.03%<br>(0.01% - 0.05%) | 0.02%<br>(0.01% - 0.04%) | 0.00%<br>(0.00% - 0.00%) | 0.00%<br>(0.00% - 0.00%) | 0.00%<br>(0.00% - 0.00%) | 0.00%<br>(0.00% - 0.00%) |
| Greater London                     | 1.91%<br>(1.67% - 2.18%)    | 1.46%<br>(1.26% - 1.69%)    | 1.33%<br>(1.16% - 1.52%)    | 1.23%<br>(1.08% - 1.42%)    | 0.04%<br>(0.02% - 0.07%)    | 0.02%<br>(0.01% - 0.04%)    | 0.02%<br>(0.01% - 0.04%) | 0.02%<br>(0.01% - 0.04%) | 0.00%<br>(0.00% - 0.00%) | 0.00%<br>(0.00% - 0.00%) | 0.00%<br>(0.00% - 0.00%) | 0.00%<br>(0.00% - 0.00%) |
| South East England                 | 1.82%<br>(1.59% - 2.12%)    | 1.40%<br>(1.20% - 1.61%)    | 1.32%<br>(1.14% - 1.52%)    | 1.27%<br>(1.10% - 1.47%)    | 0.04%<br>(0.02% - 0.07%)    | 0.02%<br>(0.01% - 0.04%)    | 0.02%<br>(0.01% - 0.04%) | 0.02%<br>(0.01% - 0.04%) | 0.00%<br>(0.00% - 0.00%) | 0.00%<br>(0.00% - 0.00%) | 0.00%<br>(0.00% - 0.00%) | 0.00%<br>(0.00% - 0.00%) |
| South West England                 | 1.90%<br>(1.64% - 2.19%)    | 1.46%<br>(1.23% - 1.72%)    | 1.38%<br>(1.20% - 1.60%)    | 1.32%<br>(1.13% - 1.53%)    | 0.04%<br>(0.02% - 0.07%)    | 0.02%<br>(0.01% - 0.05%)    | 0.03%<br>(0.01% - 0.05%) | 0.03%<br>(0.01% - 0.04%) | 0.00%<br>(0.00% - 0.00%) | 0.00%<br>(0.00% - 0.00%) | 0.00%<br>(0.00% - 0.00%) | 0.00%<br>(0.00% - 0.00%) |
| <b>Latin America and Caribbean</b> | 22.82%<br>(22.61% - 23.03%) | 19.14%<br>(18.98% - 19.31%) | 15.51%<br>(15.36% - 15.68%) | 13.90%<br>(13.70% - 14.09%) | 7.17%<br>(7.00% - 7.34%)    | 5.71%<br>(5.57% - 5.85%)    | 4.04%<br>(3.93% - 4.15%) | 3.53%<br>(3.40% - 3.67%) | 1.40%<br>(1.30% - 1.52%) | 1.05%<br>(0.96% - 1.15%) | 0.59%<br>(0.54% - 0.66%) | 0.50%<br>(0.43% - 0.57%) |
| <b>Andean Latin America</b>        | 36.37%<br>(35.38% - 37.51%) | 30.26%<br>(29.60% - 30.99%) | 23.50%<br>(22.92% - 24.05%) | 18.39%<br>(17.67% - 19.14%) | 12.75%<br>(11.94% - 13.58%) | 9.60%<br>(8.92% - 10.25%)   | 5.83%<br>(5.31% - 6.37%) | 4.13%<br>(3.61% - 4.65%) | 2.50%<br>(1.99% - 3.10%) | 1.63%<br>(1.31% - 1.96%) | 0.66%<br>(0.49% - 0.85%) | 0.39%<br>(0.25% - 0.56%) |
| Bolivia (Plurinational State of)   | 39.09%<br>(37.36% - 41.02%) | 33.97%<br>(32.71% - 35.55%) | 25.64%<br>(24.40% - 26.83%) | 19.79%<br>(18.44% - 21.15%) | 15.84%<br>(14.53% - 17.22%) | 11.28%<br>(10.15% - 12.42%) | 6.14%<br>(4.98% - 7.18%) | 4.13%<br>(3.00% - 5.18%) | 3.89%<br>(2.95% - 5.09%) | 2.08%<br>(1.54% - 2.68%) | 0.65%<br>(0.37% - 1.00%) | 0.31%<br>(0.11% - 0.58%) |
| Ecuador                            | 34.41%<br>(33.07% - 36.06%) | 28.05%<br>(26.99% - 29.17%) | 24.65%<br>(23.48% - 25.83%) | 22.26%<br>(20.87% - 23.64%) | 10.41%<br>(9.04% - 11.83%)  | 8.67%<br>(7.46% - 9.83%)    | 7.08%<br>(5.88% - 8.25%) | 6.21%<br>(5.01% - 7.44%) | 1.55%<br>(1.07% - 2.19%) | 1.39%<br>(0.95% - 1.92%) | 1.06%<br>(0.64% - 1.57%) | 0.90%<br>(0.52% - 1.43%) |
| Peru                               | 36.29%<br>(34.85% - 38.17%) | 30.00%<br>(28.97% - 31.09%) | 21.90%<br>(21.17% - 22.66%) | 15.63%<br>(14.60% - 16.72%) | 12.70%<br>(11.52% - 13.97%) | 9.44%<br>(8.40% - 10.42%)   | 4.95%<br>(4.33% - 5.58%) | 2.94%<br>(2.38% - 3.58%) | 2.43%<br>(1.66% - 3.42%) | 1.58%<br>(1.08% - 2.13%) | 0.42%<br>(0.24% - 0.63%) | 0.13%<br>(0.03% - 0.28%) |
| <b>Caribbean</b>                   | 18.52%<br>(18.17% - 18.91%) | 15.97%<br>(15.60% - 16.32%) | 14.90%<br>(14.47% - 15.32%) | 14.07%<br>(13.48% - 14.62%) | 6.57%<br>(6.18% - 6.99%)    | 4.89%<br>(4.51% - 5.23%)    | 4.10%<br>(3.72% - 4.47%) | 3.75%<br>(3.26% - 4.22%) | 1.72%<br>(1.43% - 2.08%) | 0.97%<br>(0.75% - 1.19%) | 0.62%<br>(0.46% - 0.82%) | 0.53%<br>(0.33% - 0.74%) |
| Antigua and Barbuda                | 9.89%<br>(8.98% - 10.89%)   | 8.59%<br>(7.78% - 9.43%)    | 7.88%<br>(7.12% - 8.67%)    | 7.50%<br>(6.79% - 8.21%)    | 1.95%<br>(1.56% - 2.40%)    | 1.63%<br>(1.30% - 2.01%)    | 1.50%<br>(1.19% - 1.82%) | 1.42%<br>(1.15% - 1.75%) | 0.12%<br>(0.06% - 0.22%) | 0.07%<br>(0.02% - 0.14%) | 0.05%<br>(0.01% - 0.10%) | 0.04%<br>(0.01% - 0.09%) |
| Bahamas                            | 10.90%<br>(9.96% - 11.97%)  | 9.02%<br>(8.12% - 9.92%)    | 8.65%<br>(7.83% - 9.56%)    | 8.36%<br>(7.56% - 9.16%)    | 2.41%<br>(1.95% - 2.95%)    | 1.83%<br>(1.45% - 2.26%)    | 1.75%<br>(1.39% - 2.14%) | 1.67%<br>(1.33% - 2.04%) | 0.17%<br>(0.08% - 0.31%) | 0.09%<br>(0.03% - 0.19%) | 0.07%<br>(0.02% - 0.17%) | 0.06%<br>(0.02% - 0.14%) |
| Barbados                           | 9.35%<br>(8.50% - 10.24%)   | 9.62%<br>(8.81% - 10.53%)   | 10.64%<br>(9.70% - 11.64%)  | 10.18%<br>(9.31% - 11.09%)  | 1.74%<br>(1.35% - 2.14%)    | 1.98%<br>(1.62% - 2.37%)    | 2.58%<br>(2.09% - 3.10%) | 2.50%<br>(2.04% - 3.00%) | 0.08%<br>(0.02% - 0.17%) | 0.11%<br>(0.04% - 0.20%) | 0.25%<br>(0.12% - 0.41%) | 0.25%<br>(0.12% - 0.42%) |
| Belize                             | 25.22%<br>(23.69% - 26.70%) | 22.67%<br>(21.47% - 23.90%) | 18.71%<br>(18.01% - 19.43%) | 15.99%<br>(15.15% - 16.79%) | 7.14%<br>(5.61% - 8.51%)    | 6.62%<br>(5.41% - 7.73%)    | 5.23%<br>(4.64% - 5.80%) | 4.23%<br>(3.70% - 4.78%) | 1.08%<br>(0.61% - 1.63%) | 1.06%<br>(0.67% - 1.52%) | 0.75%<br>(0.55% - 0.97%) | 0.51%<br>(0.36% - 0.70%) |

Table S8a. Estimated overall, severe, and extreme **stunting** prevalence (%) in children under 5 years, both sexes, in 1990, 2000, 2010, and 2020.

| Location                         | Total                       |                             |                             |                             | Severe                      |                             |                             |                             | Extreme                   |                           |                          |                          |
|----------------------------------|-----------------------------|-----------------------------|-----------------------------|-----------------------------|-----------------------------|-----------------------------|-----------------------------|-----------------------------|---------------------------|---------------------------|--------------------------|--------------------------|
|                                  | 1990                        | 2000                        | 2010                        | 2020                        | 1990                        | 2000                        | 2010                        | 2020                        | 1990                      | 2000                      | 2010                     | 2020                     |
| Cuba                             | 5.14%<br>(4.85% - 5.45%)    | 6.03%<br>(5.70% - 6.36%)    | 5.86%<br>(5.36% - 6.37%)    | 5.89%<br>(5.39% - 6.46%)    | 0.39%<br>(0.32% - 0.49%)    | 0.61%<br>(0.52% - 0.71%)    | 0.71%<br>(0.55% - 0.87%)    | 0.83%<br>(0.65% - 1.04%)    | 0.00%<br>(0.00% - 0.00%)  | 0.00%<br>(0.00% - 0.00%)  | 0.00%<br>(0.00% - 0.01%) | 0.01%<br>(0.00% - 0.02%) |
| Dominica                         | 11.71%<br>(10.64% - 12.75%) | 9.04%<br>(8.21% - 9.91%)    | 8.57%<br>(7.76% - 9.40%)    | 8.41%<br>(7.67% - 9.28%)    | 2.52%<br>(2.00% - 3.02%)    | 1.75%<br>(1.40% - 2.15%)    | 1.62%<br>(1.29% - 1.99%)    | 1.58%<br>(1.25% - 1.94%)    | 0.17%<br>(0.08% - 0.30%)  | 0.08%<br>(0.02% - 0.16%)  | 0.05%<br>(0.01% - 0.12%) | 0.05%<br>(0.01% - 0.11%) |
| Dominican Republic               | 19.45%<br>(18.61% - 20.34%) | 12.75%<br>(12.12% - 13.40%) | 10.07%<br>(9.44% - 10.70%)  | 8.49%<br>(7.78% - 9.27%)    | 5.37%<br>(4.70% - 6.09%)    | 2.67%<br>(2.31% - 3.04%)    | 1.86%<br>(1.59% - 2.16%)    | 1.41%<br>(1.13% - 1.73%)    | 0.75%<br>(0.51% - 1.05%)  | 0.16%<br>(0.08% - 0.26%)  | 0.06%<br>(0.02% - 0.12%) | 0.03%<br>(0.00% - 0.07%) |
| Grenada                          | 14.44%<br>(13.24% - 15.69%) | 10.69%<br>(9.78% - 11.70%)  | 10.08%<br>(9.17% - 10.98%)  | 9.19%<br>(8.35% - 10.09%)   | 3.23%<br>(2.55% - 3.94%)    | 2.22%<br>(1.78% - 2.76%)    | 2.05%<br>(1.63% - 2.47%)    | 1.83%<br>(1.46% - 2.25%)    | 0.27%<br>(0.14% - 0.46%)  | 0.13%<br>(0.06% - 0.26%)  | 0.10%<br>(0.04% - 0.19%) | 0.08%<br>(0.02% - 0.16%) |
| Guyana                           | 19.72%<br>(18.56% - 20.91%) | 15.99%<br>(14.94% - 16.99%) | 16.05%<br>(15.17% - 16.95%) | 12.43%<br>(11.45% - 13.37%) | 5.19%<br>(4.32% - 6.03%)    | 4.01%<br>(3.39% - 4.67%)    | 4.16%<br>(3.62% - 4.77%)    | 2.89%<br>(2.39% - 3.44%)    | 0.65%<br>(0.40% - 0.93%)  | 0.44%<br>(0.27% - 0.64%)  | 0.50%<br>(0.33% - 0.69%) | 0.24%<br>(0.12% - 0.40%) |
| Haiti                            | 35.55%<br>(34.56% - 36.63%) | 30.43%<br>(29.42% - 31.45%) | 25.70%<br>(24.69% - 26.73%) | 22.96%<br>(21.73% - 24.23%) | 16.81%<br>(15.48% - 18.30%) | 12.03%<br>(10.84% - 13.16%) | 8.46%<br>(7.46% - 9.45%)    | 7.16%<br>(6.03% - 8.29%)    | 5.55%<br>(4.44% - 6.88%)  | 3.04%<br>(2.29% - 3.79%)  | 1.59%<br>(1.14% - 2.11%) | 1.23%<br>(0.75% - 1.72%) |
| Jamaica                          | 12.99%<br>(12.16% - 13.82%) | 9.76%<br>(9.11% - 10.44%)   | 8.32%<br>(7.66% - 9.00%)    | 7.47%<br>(6.78% - 8.16%)    | 2.98%<br>(2.57% - 3.41%)    | 2.00%<br>(1.72% - 2.31%)    | 1.55%<br>(1.29% - 1.82%)    | 1.32%<br>(1.07% - 1.59%)    | 0.26%<br>(0.16% - 0.37%)  | 0.11%<br>(0.07% - 0.18%)  | 0.05%<br>(0.02% - 0.09%) | 0.04%<br>(0.01% - 0.07%) |
| Saint Lucia                      | 6.69%<br>(6.04% - 7.41%)    | 4.90%<br>(4.42% - 5.43%)    | 3.49%<br>(3.13% - 3.93%)    | 3.22%<br>(2.87% - 3.65%)    | 0.78%<br>(0.60% - 1.00%)    | 0.43%<br>(0.32% - 0.56%)    | 0.20%<br>(0.14% - 0.27%)    | 0.16%<br>(0.11% - 0.23%)    | 0.02%<br>(0.00% - 0.06%)  | 0.00%<br>(0.00% - 0.01%)  | 0.00%<br>(0.00% - 0.00%) | 0.00%<br>(0.00% - 0.00%) |
| Saint Vincent and the Grenadines | 13.46%<br>(12.35% - 14.73%) | 10.81%<br>(9.78% - 11.83%)  | 9.53%<br>(8.63% - 10.52%)   | 8.83%<br>(8.07% - 9.72%)    | 2.98%<br>(2.39% - 3.64%)    | 2.15%<br>(1.71% - 2.65%)    | 1.83%<br>(1.46% - 2.28%)    | 1.67%<br>(1.33% - 2.07%)    | 0.24%<br>(0.11% - 0.41%)  | 0.12%<br>(0.04% - 0.23%)  | 0.07%<br>(0.02% - 0.15%) | 0.05%<br>(0.01% - 0.13%) |
| Suriname                         | 13.66%<br>(12.57% - 14.80%) | 13.08%<br>(12.22% - 13.94%) | 9.72%<br>(9.00% - 10.45%)   | 8.56%<br>(7.77% - 9.41%)    | 2.27%<br>(1.77% - 2.89%)    | 2.38%<br>(1.96% - 2.85%)    | 1.52%<br>(1.21% - 1.84%)    | 1.24%<br>(0.95% - 1.59%)    | 0.10%<br>(0.03% - 0.20%)  | 0.11%<br>(0.04% - 0.19%)  | 0.03%<br>(0.00% - 0.07%) | 0.01%<br>(0.00% - 0.04%) |
| Trinidad and Tobago              | 6.86%<br>(6.23% - 7.51%)    | 7.61%<br>(6.91% - 8.32%)    | 9.31%<br>(8.61% - 10.03%)   | 8.55%<br>(7.80% - 9.31%)    | 0.91%<br>(0.69% - 1.19%)    | 1.41%<br>(1.10% - 1.74%)    | 2.18%<br>(1.85% - 2.59%)    | 1.97%<br>(1.62% - 2.36%)    | 0.00%<br>(0.00% - 0.02%)  | 0.07%<br>(0.02% - 0.16%)  | 0.20%<br>(0.10% - 0.32%) | 0.16%<br>(0.07% - 0.29%) |
| Bermuda                          | 8.41%<br>(7.65% - 9.25%)    | 6.96%<br>(6.33% - 7.65%)    | 6.50%<br>(5.88% - 7.18%)    | 6.02%<br>(5.46% - 6.57%)    | 1.84%<br>(1.49% - 2.20%)    | 1.47%<br>(1.22% - 1.79%)    | 1.38%<br>(1.12% - 1.67%)    | 1.27%<br>(1.03% - 1.50%)    | 0.11%<br>(0.05% - 0.21%)  | 0.07%<br>(0.02% - 0.15%)  | 0.06%<br>(0.02% - 0.12%) | 0.04%<br>(0.01% - 0.10%) |
| Puerto Rico                      | 8.64%<br>(7.82% - 9.47%)    | 6.94%<br>(6.29% - 7.63%)    | 6.27%<br>(5.66% - 6.96%)    | 5.83%<br>(5.32% - 6.47%)    | 1.84%<br>(1.47% - 2.26%)    | 1.36%<br>(1.09% - 1.65%)    | 1.22%<br>(0.99% - 1.50%)    | 1.13%<br>(0.91% - 1.39%)    | 0.11%<br>(0.04% - 0.21%)  | 0.05%<br>(0.01% - 0.11%)  | 0.03%<br>(0.01% - 0.08%) | 0.02%<br>(0.00% - 0.07%) |
| Saint Kitts and Nevis            | 12.26%<br>(11.19% - 13.40%) | 9.41%<br>(8.56% - 10.29%)   | 8.67%<br>(7.84% - 9.55%)    | 8.08%<br>(7.35% - 8.93%)    | 2.73%<br>(2.19% - 3.35%)    | 1.92%<br>(1.54% - 2.34%)    | 1.75%<br>(1.40% - 2.15%)    | 1.60%<br>(1.28% - 1.96%)    | 0.21%<br>(0.10% - 0.37%)  | 0.10%<br>(0.04% - 0.20%)  | 0.07%<br>(0.02% - 0.15%) | 0.06%<br>(0.01% - 0.13%) |
| United States Virgin Islands     | 10.46%<br>(9.49% - 11.48%)  | 8.10%<br>(7.32% - 8.93%)    | 7.31%<br>(6.61% - 8.05%)    | 7.22%<br>(6.56% - 7.97%)    | 2.25%<br>(1.82% - 2.78%)    | 1.58%<br>(1.26% - 1.94%)    | 1.38%<br>(1.11% - 1.69%)    | 1.36%<br>(1.10% - 1.68%)    | 0.15%<br>(0.06% - 0.28%)  | 0.06%<br>(0.02% - 0.14%)  | 0.04%<br>(0.01% - 0.09%) | 0.04%<br>(0.01% - 0.09%) |
| <b>Central Latin America</b>     | 26.10%<br>(25.75% - 26.43%) | 22.42%<br>(22.16% - 22.69%) | 17.96%<br>(17.72% - 18.25%) | 16.41%<br>(16.10% - 16.73%) | 8.50%<br>(8.21% - 8.79%)    | 7.09%<br>(6.87% - 7.32%)    | 5.01%<br>(4.83% - 5.20%)    | 4.54%<br>(4.30% - 4.77%)    | 1.75%<br>(1.57% - 1.94%)  | 1.46%<br>(1.30% - 1.65%)  | 0.85%<br>(0.75% - 0.98%) | 0.76%<br>(0.64% - 0.90%) |
| Colombia                         | 22.39%<br>(21.50% - 23.31%) | 18.27%<br>(17.51% - 18.97%) | 14.01%<br>(13.40% - 14.69%) | 11.77%<br>(10.82% - 12.82%) | 5.65%<br>(4.87% - 6.49%)    | 3.78%<br>(3.17% - 4.34%)    | 2.39%<br>(2.02% - 2.81%)    | 2.05%<br>(1.59% - 2.53%)    | 0.64%<br>(0.41% - 0.95%)  | 0.25%<br>(0.11% - 0.42%)  | 0.07%<br>(0.02% - 0.16%) | 0.06%<br>(0.01% - 0.17%) |
| Costa Rica                       | 10.51%<br>(9.29% - 11.69%)  | 9.16%<br>(8.24% - 10.25%)   | 7.10%<br>(6.40% - 7.87%)    | 6.30%<br>(5.68% - 6.99%)    | 1.61%<br>(1.11% - 2.18%)    | 1.30%<br>(0.94% - 1.75%)    | 0.95%<br>(0.73% - 1.22%)    | 0.84%<br>(0.62% - 1.08%)    | 0.02%<br>(0.00% - 0.09%)  | 0.01%<br>(0.00% - 0.04%)  | 0.00%<br>(0.00% - 0.01%) | 0.00%<br>(0.00% - 0.01%) |
| El Salvador                      | 33.92%<br>(32.48% - 35.70%) | 26.66%<br>(25.66% - 27.69%) | 18.93%<br>(17.96% - 19.93%) | 15.44%<br>(14.26% - 16.64%) | 10.81%<br>(9.49% - 12.06%)  | 7.78%<br>(6.77% - 8.76%)    | 4.08%<br>(3.30% - 4.88%)    | 3.01%<br>(2.31% - 3.81%)    | 1.78%<br>(1.18% - 2.45%)  | 1.15%<br>(0.73% - 1.62%)  | 0.31%<br>(0.12% - 0.53%) | 0.17%<br>(0.04% - 0.36%) |
| Guatemala                        | 58.56%<br>(55.87% - 60.88%) | 49.62%<br>(47.74% - 51.95%) | 43.11%<br>(41.47% - 45.12%) | 40.06%<br>(38.44% - 42.11%) | 29.27%<br>(26.73% - 32.02%) | 25.24%<br>(23.44% - 27.10%) | 18.81%<br>(17.29% - 20.57%) | 16.48%<br>(14.80% - 18.34%) | 8.39%<br>(6.21% - 10.96%) | 5.24%<br>(6.67% - 10.74%) | 5.12%<br>(3.85% - 6.67%) | 4.15%<br>(2.94% - 5.68%) |
| Honduras                         | 41.77%<br>(39.96% - 43.96%) | 36.30%<br>(35.12% - 37.79%) | 26.29%<br>(25.09% - 27.51%) | 23.36%<br>(21.92% - 24.83%) | 16.53%<br>(14.97% - 18.12%) | 13.03%<br>(11.80% - 14.19%) | 7.52%<br>(6.26% - 8.84%)    | 6.37%<br>(4.93% - 7.67%)    | 3.74%<br>(2.88% - 4.83%)  | 2.51%<br>(1.89% - 3.19%)  | 1.06%<br>(0.61% - 1.63%) | 0.84%<br>(0.40% - 1.40%) |
| Mexico                           | 23.65%<br>(23.27% - 24.00%) | 19.35%<br>(19.07% - 19.63%) | 15.30%<br>(15.04% - 15.53%) | 13.85%<br>(13.61% - 14.10%) | 6.80%<br>(6.52% - 7.08%)    | 5.29%<br>(5.08% - 5.49%)    | 3.74%<br>(3.57% - 3.90%)    | 3.36%<br>(3.19% - 3.54%)    | 1.31%<br>(1.19% - 1.45%)  | 0.86%<br>(0.78% - 0.95%)  | 0.53%<br>(0.46% - 0.60%) | 0.49%<br>(0.42% - 0.56%) |

Table S8a. Estimated overall, severe, and extreme **stunting** prevalence (%) in children under 5 years, both sexes, in 1990, 2000, 2010, and 2020.

| Location                   | Total                       |                             |                             |                             | Severe                      |                             |                             |                             | Extreme                  |                          |                          |                          |
|----------------------------|-----------------------------|-----------------------------|-----------------------------|-----------------------------|-----------------------------|-----------------------------|-----------------------------|-----------------------------|--------------------------|--------------------------|--------------------------|--------------------------|
|                            | 1990                        | 2000                        | 2010                        | 2020                        | 1990                        | 2000                        | 2010                        | 2020                        | 1990                     | 2000                     | 2010                     | 2020                     |
| <i>Agua Calientes</i>      | 14.93%<br>(13.63% - 16.26%) | 12.21%<br>(11.13% - 13.37%) | 11.20%<br>(10.22% - 12.23%) | 10.49%<br>(9.51% - 11.49%)  | 2.94%<br>(2.29% - 3.68%)    | 2.07%<br>(1.59% - 2.60%)    | 1.99%<br>(1.55% - 2.48%)    | 1.86%<br>(1.44% - 2.32%)    | 0.27%<br>(0.16% - 0.44%) | 0.09%<br>(0.04% - 0.17%) | 0.05%<br>(0.01% - 0.13%) | 0.04%<br>(0.01% - 0.11%) |
| <i>Baja California</i>     | 11.91%<br>(10.82% - 12.98%) | 9.00%<br>(8.15% - 9.88%)    | 7.93%<br>(7.22% - 8.69%)    | 7.34%<br>(6.65% - 8.06%)    | 2.45%<br>(1.89% - 3.05%)    | 1.52%<br>(1.14% - 1.97%)    | 1.22%<br>(0.95% - 1.54%)    | 1.10%<br>(0.83% - 1.43%)    | 0.22%<br>(0.07% - 0.42%) | 0.07%<br>(0.00% - 0.21%) | 0.02%<br>(0.00% - 0.08%) | 0.02%<br>(0.00% - 0.09%) |
| <i>Baja California Sur</i> | 20.42%<br>(19.20% - 21.73%) | 17.95%<br>(16.92% - 19.03%) | 16.49%<br>(15.45% - 17.49%) | 15.35%<br>(14.16% - 16.50%) | 7.07%<br>(6.12% - 8.18%)    | 5.67%<br>(4.92% - 6.45%)    | 4.79%<br>(4.14% - 5.49%)    | 4.41%<br>(3.69% - 5.14%)    | 1.51%<br>(1.08% - 2.05%) | 1.03%<br>(0.73% - 1.36%) | 0.73%<br>(0.50% - 1.00%) | 0.66%<br>(0.41% - 0.93%) |
| <i>Campeche</i>            | 38.60%<br>(36.63% - 40.83%) | 31.09%<br>(28.51% - 33.68%) | 22.93%<br>(20.88% - 24.71%) | 20.74%<br>(18.90% - 22.39%) | 16.70%<br>(14.34% - 18.97%) | 10.60%<br>(8.01% - 12.75%)  | 6.04%<br>(4.41% - 7.54%)    | 5.76%<br>(4.43% - 7.06%)    | 4.55%<br>(2.97% - 6.36%) | 1.99%<br>(1.19% - 3.01%) | 0.90%<br>(0.53% - 1.36%) | 0.92%<br>(0.55% - 1.42%) |
| <i>Coahuila</i>            | 13.81%<br>(12.62% - 15.07%) | 11.10%<br>(10.13% - 12.15%) | 9.46%<br>(8.67% - 10.37%)   | 8.76%<br>(7.94% - 9.63%)    | 2.61%<br>(2.08% - 3.22%)    | 1.94%<br>(1.53% - 2.41%)    | 1.50%<br>(1.20% - 1.86%)    | 1.30%<br>(1.03% - 1.63%)    | 0.27%<br>(0.16% - 0.40%) | 0.12%<br>(0.06% - 0.20%) | 0.08%<br>(0.04% - 0.13%) | 0.06%<br>(0.02% - 0.11%) |
| <i>Colima</i>              | 7.71%<br>(7.00% - 8.59%)    | 5.40%<br>(4.86% - 5.98%)    | 4.75%<br>(4.25% - 5.28%)    | 4.63%<br>(4.12% - 5.13%)    | 0.38%<br>(0.22% - 0.59%)    | 0.28%<br>(0.17% - 0.43%)    | 0.25%<br>(0.14% - 0.37%)    | 0.25%<br>(0.14% - 0.37%)    | 0.00%<br>(0.00% - 0.00%) | 0.00%<br>(0.00% - 0.00%) | 0.00%<br>(0.00% - 0.00%) | 0.00%<br>(0.00% - 0.00%) |
| <i>Chiapas</i>             | 40.80%<br>(39.18% - 42.80%) | 36.68%<br>(34.82% - 38.87%) | 29.95%<br>(28.46% - 31.51%) | 26.20%<br>(24.62% - 27.81%) | 18.76%<br>(17.41% - 20.22%) | 13.92%<br>(12.49% - 15.39%) | 9.10%<br>(7.35% - 10.58%)   | 7.59%<br>(6.12% - 9.03%)    | 5.61%<br>(4.64% - 6.86%) | 3.03%<br>(2.25% - 3.98%) | 1.51%<br>(0.97% - 2.16%) | 1.22%<br>(0.74% - 1.82%) |
| <i>Chihuahua</i>           | 15.20%<br>(14.03% - 16.48%) | 13.86%<br>(12.99% - 14.84%) | 10.17%<br>(9.41% - 10.96%)  | 9.41%<br>(8.58% - 10.28%)   | 2.84%<br>(2.30% - 3.45%)    | 2.70%<br>(2.31% - 3.16%)    | 1.61%<br>(1.31% - 1.94%)    | 1.57%<br>(1.24% - 1.95%)    | 0.32%<br>(0.22% - 0.45%) | 0.41%<br>(0.32% - 0.51%) | 0.06%<br>(0.03% - 0.11%) | 0.06%<br>(0.02% - 0.14%) |
| <i>Mexico City</i>         | 15.84%<br>(14.60% - 17.16%) | 13.33%<br>(12.35% - 14.36%) | 12.75%<br>(11.73% - 13.83%) | 11.50%<br>(10.49% - 12.58%) | 3.09%<br>(2.42% - 3.86%)    | 2.62%<br>(2.07% - 3.19%)    | 2.45%<br>(1.97% - 3.04%)    | 2.26%<br>(1.78% - 2.85%)    | 0.28%<br>(0.12% - 0.48%) | 0.22%<br>(0.11% - 0.38%) | 0.14%<br>(0.07% - 0.27%) | 0.13%<br>(0.05% - 0.28%) |
| <i>Durango</i>             | 17.63%<br>(16.42% - 18.91%) | 13.32%<br>(12.33% - 14.41%) | 11.15%<br>(10.24% - 11.99%) | 10.01%<br>(9.11% - 10.91%)  | 4.86%<br>(4.02% - 5.77%)    | 3.10%<br>(2.53% - 3.72%)    | 2.47%<br>(2.01% - 2.95%)    | 2.23%<br>(1.78% - 2.72%)    | 0.73%<br>(0.43% - 1.12%) | 0.30%<br>(0.13% - 0.50%) | 0.20%<br>(0.08% - 0.36%) | 0.18%<br>(0.06% - 0.34%) |
| <i>Guanajuato</i>          | 20.45%<br>(18.83% - 21.92%) | 15.20%<br>(14.20% - 16.23%) | 12.42%<br>(11.63% - 13.33%) | 10.58%<br>(9.59% - 11.52%)  | 3.83%<br>(2.85% - 4.82%)    | 3.01%<br>(2.45% - 3.61%)    | 2.34%<br>(1.96% - 2.82%)    | 1.91%<br>(1.49% - 2.36%)    | 0.30%<br>(0.16% - 0.49%) | 0.18%<br>(0.09% - 0.32%) | 0.11%<br>(0.04% - 0.20%) | 0.09%<br>(0.02% - 0.20%) |
| <i>Guerrero</i>            | 40.08%<br>(38.80% - 41.67%) | 33.56%<br>(32.55% - 34.89%) | 25.53%<br>(24.57% - 26.58%) | 21.36%<br>(20.12% - 22.65%) | 18.55%<br>(17.42% - 19.68%) | 12.93%<br>(11.84% - 14.08%) | 8.23%<br>(7.25% - 9.19%)    | 6.57%<br>(5.56% - 7.64%)    | 5.71%<br>(4.68% - 6.84%) | 3.04%<br>(2.39% - 3.81%) | 1.58%<br>(1.18% - 2.05%) | 1.21%<br>(0.84% - 1.65%) |
| <i>Hidalgo</i>             | 35.86%<br>(32.92% - 38.68%) | 27.64%<br>(26.25% - 29.06%) | 22.48%<br>(21.23% - 23.81%) | 20.27%<br>(18.96% - 21.61%) | 11.58%<br>(9.45% - 13.79%)  | 8.61%<br>(7.10% - 10.07%)   | 7.20%<br>(6.16% - 8.28%)    | 7.02%<br>(5.98% - 8.12%)    | 2.11%<br>(1.20% - 3.22%) | 1.61%<br>(0.97% - 2.36%) | 1.36%<br>(0.92% - 1.90%) | 1.58%<br>(1.07% - 2.13%) |
| <i>Jalisco</i>             | 13.99%<br>(12.78% - 15.21%) | 10.85%<br>(9.95% - 11.82%)  | 8.98%<br>(8.21% - 9.85%)    | 8.33%<br>(7.53% - 9.16%)    | 2.40%<br>(1.76% - 3.11%)    | 1.91%<br>(1.46% - 2.44%)    | 1.39%<br>(1.07% - 1.75%)    | 1.17%<br>(0.87% - 1.54%)    | 0.11%<br>(0.02% - 0.30%) | 0.08%<br>(0.01% - 0.20%) | 0.02%<br>(0.00% - 0.07%) | 0.01%<br>(0.00% - 0.04%) |
| <i>México</i>              | 25.99%<br>(24.37% - 27.60%) | 20.73%<br>(19.48% - 21.94%) | 14.66%<br>(13.58% - 15.71%) | 12.87%<br>(11.80% - 14.00%) | 6.15%<br>(4.77% - 7.41%)    | 4.93%<br>(3.93% - 5.89%)    | 2.88%<br>(2.24% - 3.53%)    | 2.39%<br>(1.80% - 3.05%)    | 0.89%<br>(0.60% - 1.22%) | 0.59%<br>(0.38% - 0.85%) | 0.30%<br>(0.16% - 0.51%) | 0.24%<br>(0.12% - 0.44%) |
| <i>Michoacán de Ocampo</i> | 23.19%<br>(21.74% - 24.70%) | 18.41%<br>(17.15% - 19.58%) | 15.00%<br>(14.02% - 16.05%) | 13.20%<br>(12.18% - 14.26%) | 5.63%<br>(4.44% - 6.89%)    | 4.57%<br>(3.76% - 5.43%)    | 3.55%<br>(2.95% - 4.17%)    | 3.01%<br>(2.43% - 3.63%)    | 0.64%<br>(0.34% - 1.05%) | 0.51%<br>(0.29% - 0.77%) | 0.34%<br>(0.19% - 0.53%) | 0.26%<br>(0.14% - 0.44%) |
| <i>Morelos</i>             | 17.43%<br>(15.95% - 18.77%) | 13.69%<br>(12.53% - 14.80%) | 11.17%<br>(10.27% - 12.20%) | 10.19%<br>(9.28% - 11.15%)  | 3.22%<br>(2.41% - 4.09%)    | 2.63%<br>(2.03% - 3.26%)    | 2.06%<br>(1.65% - 2.52%)    | 1.86%<br>(1.47% - 2.28%)    | 0.23%<br>(0.11% - 0.42%) | 0.15%<br>(0.07% - 0.27%) | 0.11%<br>(0.05% - 0.20%) | 0.08%<br>(0.04% - 0.16%) |
| <i>Nayarit</i>             | 11.88%<br>(10.75% - 13.16%) | 8.80%<br>(7.99% - 9.78%)    | 7.32%<br>(6.63% - 8.08%)    | 6.84%<br>(6.13% - 7.63%)    | 0.96%<br>(0.60% - 1.40%)    | 0.81%<br>(0.55% - 1.10%)    | 0.71%<br>(0.51% - 0.96%)    | 0.68%<br>(0.48% - 0.91%)    | 0.00%<br>(0.00% - 0.01%) | 0.00%<br>(0.00% - 0.00%) | 0.00%<br>(0.00% - 0.00%) | 0.00%<br>(0.00% - 0.00%) |
| <i>Nuevo León</i>          | 13.10%<br>(11.91% - 14.33%) | 10.00%<br>(9.06% - 11.05%)  | 8.60%<br>(7.81% - 9.47%)    | 8.14%<br>(7.32% - 8.94%)    | 2.11%<br>(1.62% - 2.64%)    | 1.29%<br>(0.96% - 1.69%)    | 1.20%<br>(0.88% - 1.57%)    | 1.20%<br>(0.89% - 1.54%)    | 0.11%<br>(0.06% - 0.17%) | 0.01%<br>(0.00% - 0.03%) | 0.01%<br>(0.00% - 0.06%) | 0.01%<br>(0.00% - 0.07%) |
| <i>Oaxaca</i>              | 41.78%<br>(40.16% - 43.87%) | 36.31%<br>(35.05% - 37.57%) | 29.82%<br>(28.56% - 31.08%) | 27.74%<br>(26.41% - 29.17%) | 18.54%<br>(16.34% - 20.73%) | 15.71%<br>(14.18% - 17.33%) | 12.57%<br>(11.19% - 14.15%) | 11.67%<br>(10.03% - 13.29%) | 5.34%<br>(3.49% - 7.54%) | 4.54%<br>(3.33% - 5.97%) | 3.67%<br>(2.66% - 4.90%) | 3.45%<br>(2.36% - 4.60%) |
| <i>Puebla</i>              | 31.97%<br>(30.20% - 34.17%) | 26.02%<br>(24.64% - 27.46%) | 21.16%<br>(19.81% - 22.43%) | 20.92%<br>(19.46% - 22.28%) | 9.00%<br>(7.07% - 10.75%)   | 7.30%<br>(5.90% - 8.69%)    | 5.86%<br>(4.76% - 6.95%)    | 6.08%<br>(4.90% - 7.25%)    | 1.23%<br>(0.59% - 2.05%) | 1.01%<br>(0.51% - 1.62%) | 0.80%<br>(0.45% - 1.23%) | 0.92%<br>(0.47% - 1.46%) |
| <i>Querétaro</i>           | 18.96%<br>(17.54% - 20.33%) | 14.73%<br>(13.55% - 16.01%) | 13.09%<br>(12.04% - 14.27%) | 12.05%<br>(10.95% - 13.10%) | 4.48%<br>(3.48% - 5.46%)    | 2.99%<br>(2.34% - 3.73%)    | 2.63%<br>(2.11% - 3.23%)    | 2.46%<br>(1.94% - 3.03%)    | 0.55%<br>(0.36% - 0.78%) | 0.19%<br>(0.10% - 0.35%) | 0.13%<br>(0.06% - 0.26%) | 0.12%<br>(0.04% - 0.25%) |
|                            | 26.59%                      | 20.59%                      | 16.65%                      | 15.51%                      | 6.71%                       | 5.17%                       | 3.90%                       | 3.78%                       | 0.83%                    | 0.60%                    | 0.36%                    | 0.39%                    |



Table S8a. Estimated overall, severe, and extreme **stunting** prevalence (%) in children under 5 years, both sexes, in 1990, 2000, 2010, and 2020.

| Location                           | Total             |                   |                   |                   | Severe            |                  |                 |                 | Extreme         |                 |                 |                 |
|------------------------------------|-------------------|-------------------|-------------------|-------------------|-------------------|------------------|-----------------|-----------------|-----------------|-----------------|-----------------|-----------------|
|                                    | 1990              | 2000              | 2010              | 2020              | 1990              | 2000             | 2010            | 2020            | 1990            | 2000            | 2010            | 2020            |
| Quintana Roo                       | (24.96% - 28.67%) | (19.27% - 21.87%) | (15.43% - 17.80%) | (14.35% - 16.77%) | (5.18% - 8.18%)   | (4.02% - 6.26%)  | (3.12% - 4.69%) | (3.04% - 4.63%) | (0.33% - 1.50%) | (0.24% - 1.04%) | (0.16% - 0.62%) | (0.17% - 0.67%) |
|                                    | 24.86%            | 18.85%            | 12.04%            | 9.97%             | 7.64%             | 4.66%            | 2.31%           | 2.09%           | 1.57%           | 0.64%           | 0.18%           | 0.22%           |
| San Luis Potosí                    | (23.01% - 26.61%) | (17.41% - 20.29%) | (11.07% - 13.06%) | (9.12% - 10.90%)  | (6.06% - 9.30%)   | (3.72% - 5.73%)  | (1.85% - 2.84%) | (1.67% - 2.60%) | (0.91% - 2.37%) | (0.30% - 1.08%) | (0.06% - 0.35%) | (0.08% - 0.41%) |
|                                    | 22.29%            | 18.33%            | 11.91%            | 11.15%            | 7.86%             | 5.24%            | 2.36%           | 2.21%           | 2.07%           | 0.94%           | 0.20%           | 0.17%           |
| Sinaloa                            | (21.00% - 23.59%) | (17.21% - 19.52%) | (11.02% - 12.83%) | (10.17% - 12.20%) | (6.65% - 9.16%)   | (4.33% - 6.13%)  | (1.86% - 2.94%) | (1.69% - 2.83%) | (1.38% - 2.92%) | (0.56% - 1.40%) | (0.06% - 0.39%) | (0.03% - 0.38%) |
|                                    | 15.42%            | 13.07%            | 12.73%            | 11.48%            | 3.95%             | 3.06%            | 3.37%           | 3.06%           | 0.54%           | 0.35%           | 0.58%           | 0.54%           |
| Sonora                             | (14.31% - 16.59%) | (12.05% - 14.10%) | (11.77% - 13.72%) | (10.44% - 12.53%) | (3.20% - 4.77%)   | (2.47% - 3.68%)  | (2.75% - 4.15%) | (2.42% - 3.81%) | (0.28% - 0.85%) | (0.16% - 0.57%) | (0.32% - 0.95%) | (0.27% - 0.92%) |
|                                    | 30.23%            | 23.69%            | 18.03%            | 16.36%            | 9.00%             | 6.84%            | 4.71%           | 4.40%           | 1.52%           | 1.08%           | 0.59%           | 0.60%           |
| Tabasco                            | (28.49% - 32.12%) | (22.30% - 25.09%) | (16.81% - 19.32%) | (15.03% - 17.69%) | (7.13% - 10.72%)  | (5.38% - 8.31%)  | (3.83% - 5.64%) | (3.51% - 5.37%) | (0.79% - 2.39%) | (0.57% - 1.73%) | (0.34% - 0.92%) | (0.32% - 0.94%) |
|                                    | 11.54%            | 8.72%             | 7.00%             | 6.65%             | 1.45%             | 1.03%            | 0.65%           | 0.59%           | 0.01%           | 0.00%           | 0.00%           | 0.00%           |
| Tamaulipas                         | (10.35% - 12.74%) | (7.88% - 9.64%)   | (6.28% - 7.81%)   | (5.96% - 7.47%)   | (0.98% - 1.99%)   | (0.73% - 1.40%)  | (0.44% - 0.90%) | (0.39% - 0.86%) | (0.00% - 0.05%) | (0.00% - 0.01%) | (0.00% - 0.00%) | (0.00% - 0.00%) |
|                                    | 22.46%            | 17.55%            | 14.35%            | 13.29%            | 2.73%             | 2.56%            | 2.82%           | 2.99%           | 0.11%           | 0.08%           | 0.14%           | 0.24%           |
| Tlaxcala                           | (20.37% - 24.57%) | (16.00% - 19.11%) | (13.13% - 15.53%) | (12.19% - 14.52%) | (1.56% - 4.07%)   | (1.74% - 3.49%)  | (2.17% - 3.53%) | (2.38% - 3.66%) | (0.02% - 0.28%) | (0.01% - 0.24%) | (0.03% - 0.31%) | (0.08% - 0.45%) |
|                                    | 22.36%            | 19.01%            | 12.60%            | 9.99%             | 5.19%             | 4.67%            | 2.37%           | 1.52%           | 0.60%           | 0.53%           | 0.17%           | 0.09%           |
| Veracruz de Ignacio de la Llave    | (20.70% - 24.08%) | (17.78% - 20.24%) | (11.79% - 13.52%) | (9.13% - 10.85%)  | (3.98% - 6.44%)   | (3.82% - 5.53%)  | (1.98% - 2.82%) | (1.21% - 1.88%) | (0.35% - 0.95%) | (0.32% - 0.79%) | (0.11% - 0.26%) | (0.05% - 0.15%) |
|                                    | 38.03%            | 30.80%            | 26.63%            | 25.12%            | 11.17%            | 9.61%            | 8.37%           | 8.01%           | 1.59%           | 1.60%           | 1.49%           | 1.47%           |
| Yucatán                            | (35.80% - 41.04%) | (29.33% - 32.41%) | (25.32% - 27.89%) | (23.65% - 26.54%) | (9.44% - 12.93%)  | (8.03% - 11.09%) | (6.85% - 9.80%) | (6.46% - 9.47%) | (0.87% - 2.59%) | (0.95% - 2.41%) | (0.95% - 2.16%) | (0.87% - 2.14%) |
|                                    | 17.29%            | 14.61%            | 12.34%            | 11.39%            | 3.35%             | 2.57%            | 2.05%           | 1.82%           | 0.29%           | 0.13%           | 0.08%           | 0.05%           |
| Zacatecas                          | (15.82% - 18.93%) | (13.40% - 15.86%) | (11.23% - 13.50%) | (10.27% - 12.57%) | (2.53% - 4.24%)   | (1.90% - 3.28%)  | (1.57% - 2.59%) | (1.35% - 2.30%) | (0.18% - 0.46%) | (0.06% - 0.23%) | (0.03% - 0.14%) | (0.01% - 0.12%) |
|                                    | 28.42%            | 25.47%            | 19.95%            | 16.58%            | 11.86%            | 8.94%            | 5.95%           | 4.68%           | 3.34%           | 1.89%           | 0.95%           | 0.68%           |
| Nicaragua                          | (27.39% - 29.48%) | (24.70% - 26.26%) | (18.99% - 20.89%) | (15.44% - 17.73%) | (10.72% - 13.03%) | (8.04% - 9.86%)  | (5.17% - 6.77%) | (3.86% - 5.54%) | (2.65% - 4.14%) | (1.43% - 2.41%) | (0.65% - 1.31%) | (0.39% - 1.03%) |
|                                    | 18.89%            | 20.10%            | 19.54%            | 15.42%            | 5.99%             | 6.71%            | 5.93%           | 4.20%           | 1.08%           | 1.32%           | 0.98%           | 0.55%           |
| Panama                             | (17.84% - 20.05%) | (19.28% - 20.97%) | (18.63% - 20.45%) | (14.19% - 16.63%) | (5.12% - 6.96%)   | (5.96% - 7.46%)  | (5.17% - 6.64%) | (3.39% - 5.02%) | (0.74% - 1.49%) | (0.97% - 1.68%) | (0.69% - 1.29%) | (0.30% - 0.84%) |
|                                    | 19.98%            | 19.46%            | 15.92%            | 15.43%            | 6.24%             | 6.19%            | 4.56%           | 4.43%           | 1.06%           | 1.10%           | 0.67%           | 0.66%           |
| Venezuela (Bolivarian Republic of) | (19.21% - 20.77%) | (18.78% - 20.18%) | (15.02% - 16.85%) | (14.29% - 16.58%) | (5.66% - 6.90%)   | (5.69% - 6.73%)  | (4.00% - 5.17%) | (3.70% - 5.16%) | (0.85% - 1.31%) | (0.92% - 1.30%) | (0.49% - 0.87%) | (0.42% - 0.94%) |
|                                    | 15.56%            | 11.92%            | 9.76%             | 8.73%             | 3.92%             | 2.81%            | 2.14%           | 1.88%           | 0.55%           | 0.33%           | 0.21%           | 0.17%           |
| <b>Tropical Latin America</b>      | (15.30% - 15.82%) | (11.71% - 12.14%) | (9.55% - 9.97%)   | (8.55% - 8.93%)   | (3.75% - 4.09%)   | (2.69% - 2.93%)  | (2.03% - 2.26%) | (1.77% - 1.99%) | (0.49% - 0.62%) | (0.29% - 0.37%) | (0.18% - 0.25%) | (0.14% - 0.21%) |
|                                    | 15.44%            | 11.78%            | 9.67%             | 8.79%             | 3.90%             | 2.77%            | 2.13%           | 1.91%           | 0.55%           | 0.33%           | 0.21%           | 0.18%           |
| Brazil                             | (15.18% - 15.71%) | (11.56% - 11.99%) | (9.46% - 9.89%)   | (8.59% - 8.99%)   | (3.72% - 4.07%)   | (2.65% - 2.90%)  | (2.02% - 2.25%) | (1.80% - 2.02%) | (0.49% - 0.62%) | (0.29% - 0.37%) | (0.18% - 0.26%) | (0.14% - 0.22%) |
|                                    | 25.11%            | 14.31%            | 10.54%            | 9.53%             | 2.89%             | 0.54%            | 0.36%           | 0.46%           | 0.09%           | 0.00%           | 0.00%           | 0.00%           |
| Acre                               | (20.85% - 30.42%) | (12.70% - 16.07%) | (9.33% - 11.87%)  | (8.46% - 10.55%)  | (0.99% - 5.11%)   | (0.09% - 1.15%)  | (0.08% - 0.75%) | (0.18% - 0.82%) | (0.00% - 0.33%) | (0.00% - 0.00%) | (0.00% - 0.00%) | (0.00% - 0.00%) |
|                                    | 20.86%            | 15.97%            | 13.02%            | 11.83%            | 5.83%             | 4.00%            | 3.05%           | 2.71%           | 0.97%           | 0.56%           | 0.34%           | 0.27%           |
| Alagoas                            | (19.47% - 22.18%) | (14.80% - 17.11%) | (11.95% - 14.17%) | (10.80% - 12.96%) | (4.79% - 6.90%)   | (3.27% - 4.75%)  | (2.50% - 3.68%) | (2.20% - 3.31%) | (0.70% - 1.32%) | (0.39% - 0.76%) | (0.22% - 0.50%) | (0.16% - 0.42%) |
|                                    | 16.86%            | 12.33%            | 10.62%            | 9.58%             | 3.13%             | 2.27%            | 1.87%           | 1.67%           | 0.26%           | 0.15%           | 0.09%           | 0.06%           |
| Amazonas                           | (15.52% - 18.28%) | (11.25% - 13.42%) | (9.59% - 11.68%)  | (8.67% - 10.54%)  | (2.16% - 4.14%)   | (1.68% - 2.86%)  | (1.39% - 2.44%) | (1.24% - 2.19%) | (0.03% - 0.57%) | (0.02% - 0.32%) | (0.00% - 0.23%) | (0.00% - 0.20%) |
|                                    | 15.82%            | 11.54%            | 9.10%             | 8.71%             | 3.99%             | 2.42%            | 1.64%           | 1.60%           | 0.44%           | 0.12%           | 0.03%           | 0.03%           |
| Amapá                              | (14.50% - 17.16%) | (10.47% - 12.62%) | (8.23% - 10.05%)  | (7.84% - 9.62%)   | (3.21% - 4.84%)   | (1.91% - 2.98%)  | (1.25% - 2.08%) | (1.25% - 2.01%) | (0.23% - 0.72%) | (0.04% - 0.25%) | (0.00% - 0.12%) | (0.00% - 0.11%) |
|                                    | 20.11%            | 16.88%            | 14.05%            | 12.72%            | 6.24%             | 5.00%            | 3.91%           | 3.45%           | 1.10%           | 0.84%           | 0.56%           | 0.46%           |
| Bahia                              | (18.92% - 21.24%) | (15.75% - 18.05%) | (13.04% - 15.13%) | (11.70% - 13.85%) | (5.37% - 7.17%)   | (4.27% - 5.76%)  | (3.27% - 4.60%) | (2.85% - 4.06%) | (0.78% - 1.50%) | (0.57% - 1.15%) | (0.36% - 0.81%) | (0.28% - 0.69%) |
|                                    | 24.10%            | 17.55%            | 9.57%             | 7.74%             | 6.88%             | 4.57%            | 1.82%           | 1.36%           | 1.00%           | 0.54%           | 0.10%           | 0.04%           |
| Ceará                              | (22.81% - 25.29%) | (16.56% - 18.48%) | (8.71% - 10.48%)  | (6.95% - 8.61%)   | (5.71% - 8.01%)   | (3.83% - 5.30%)  | (1.39% - 2.33%) | (1.03% - 1.76%) | (0.62% - 1.45%) | (0.30% - 0.81%) | (0.00% - 0.24%) | (0.00% - 0.13%) |
|                                    | 10.45%            | 7.17%             | 5.48%             | 4.97%             | 1.77%             | 0.98%            | 0.65%           | 0.61%           | 0.06%           | 0.00%           | 0.00%           | 0.00%           |
| Distrito Federal                   | (9.50% - 11.41%)  | (6.53% - 7.85%)   | (4.90% - 6.08%)   | (4.44% - 5.50%)   | (1.38% - 2.22%)   | (0.74% - 1.24%)  | (0.47% - 0.85%) | (0.45% - 0.79%) | (0.02% - 0.13%) | (0.00% - 0.01%) | (0.00% - 0.00%) | (0.00% - 0.00%) |
|                                    | 12.85%            | 8.85%             | 6.89%             | 6.28%             | 2.65%             | 1.55%            | 1.06%           | 0.99%           | 0.15%           | 0.02%           | 0.00%           | 0.00%           |
| Espírito Santo                     | (11.72% - 14.05%) | (8.00% - 9.74%)   | (6.20% - 7.65%)   | (5.65% - 6.95%)   | (2.07% - 3.34%)   | (1.20% - 1.96%)  | (0.82% - 1.34%) | (0.76% - 1.26%) | (0.06% - 0.31%) | (0.00% - 0.07%) | (0.00% - 0.02%) | (0.00% - 0.01%) |

Table S8a. Estimated overall, severe, and extreme **stunting** prevalence (%) in children under 5 years, both sexes, in 1990, 2000, 2010, and 2020.

| Location                   | Total                       |                             |                             |                             | Severe                     |                          |                          |                          | Extreme                  |                          |                          |                          |
|----------------------------|-----------------------------|-----------------------------|-----------------------------|-----------------------------|----------------------------|--------------------------|--------------------------|--------------------------|--------------------------|--------------------------|--------------------------|--------------------------|
|                            | 1990                        | 2000                        | 2010                        | 2020                        | 1990                       | 2000                     | 2010                     | 2020                     | 1990                     | 2000                     | 2010                     | 2020                     |
| <i>Goias</i>               | 17.75%<br>(16.45% - 19.03%) | 11.69%<br>(10.64% - 12.87%) | 8.77%<br>(7.95% - 9.73%)    | 7.99%<br>(7.19% - 8.81%)    | 4.35%<br>(3.50% - 5.26%)   | 2.46%<br>(1.99% - 3.07%) | 1.56%<br>(1.22% - 1.98%) | 1.45%<br>(1.16% - 1.83%) | 0.46%<br>(0.23% - 0.74%) | 0.14%<br>(0.04% - 0.29%) | 0.03%<br>(0.00% - 0.10%) | 0.02%<br>(0.00% - 0.09%) |
| <i>Maranhão</i>            | 31.04%<br>(29.82% - 32.36%) | 23.77%<br>(22.48% - 25.00%) | 19.69%<br>(18.46% - 21.00%) | 18.03%<br>(16.70% - 19.43%) | 11.14%<br>(9.76% - 12.53%) | 7.66%<br>(6.51% - 8.78%) | 6.04%<br>(5.05% - 7.15%) | 5.37%<br>(4.33% - 6.39%) | 2.36%<br>(1.72% - 3.17%) | 1.40%<br>(0.97% - 1.94%) | 1.03%<br>(0.64% - 1.51%) | 0.86%<br>(0.51% - 1.27%) |
| <i>Minas Gerais</i>        | 10.56%<br>(9.54% - 11.53%)  | 7.72%<br>(7.04% - 8.45%)    | 6.40%<br>(5.81% - 7.03%)    | 5.73%<br>(5.19% - 6.30%)    | 1.59%<br>(1.25% - 1.97%)   | 1.18%<br>(0.95% - 1.45%) | 0.94%<br>(0.75% - 1.16%) | 0.84%<br>(0.66% - 1.04%) | 0.08%<br>(0.03% - 0.15%) | 0.05%<br>(0.02% - 0.10%) | 0.03%<br>(0.00% - 0.07%) | 0.02%<br>(0.00% - 0.05%) |
| <i>Mato Grosso do Sul</i>  | 17.55%<br>(16.34% - 18.79%) | 13.31%<br>(12.25% - 14.43%) | 10.52%<br>(9.57% - 11.57%)  | 9.40%<br>(8.59% - 10.29%)   | 5.33%<br>(4.45% - 6.25%)   | 3.64%<br>(3.04% - 4.43%) | 2.55%<br>(2.06% - 3.14%) | 2.25%<br>(1.83% - 2.71%) | 0.91%<br>(0.59% - 1.28%) | 0.49%<br>(0.29% - 0.78%) | 0.24%<br>(0.10% - 0.42%) | 0.18%<br>(0.06% - 0.33%) |
| <i>Mato Grosso</i>         | 14.82%<br>(13.68% - 16.02%) | 10.61%<br>(9.69% - 11.58%)  | 8.46%<br>(7.71% - 9.29%)    | 7.62%<br>(6.90% - 8.43%)    | 3.25%<br>(2.57% - 4.05%)   | 2.21%<br>(1.78% - 2.71%) | 1.66%<br>(1.31% - 2.04%) | 1.49%<br>(1.17% - 1.85%) | 0.26%<br>(0.08% - 0.51%) | 0.13%<br>(0.03% - 0.28%) | 0.07%<br>(0.00% - 0.18%) | 0.06%<br>(0.00% - 0.16%) |
| <i>Pará</i>                | 25.86%<br>(24.39% - 27.53%) | 20.08%<br>(18.79% - 21.39%) | 16.13%<br>(14.91% - 17.32%) | 14.75%<br>(13.55% - 15.92%) | 7.56%<br>(5.94% - 8.97%)   | 5.66%<br>(4.65% - 6.75%) | 4.22%<br>(3.36% - 5.11%) | 3.84%<br>(3.04% - 4.65%) | 1.17%<br>(0.62% - 1.81%) | 0.83%<br>(0.46% - 1.27%) | 0.54%<br>(0.26% - 0.89%) | 0.48%<br>(0.22% - 0.79%) |
| <i>Paraíba</i>             | 21.41%<br>(20.16% - 22.54%) | 16.45%<br>(15.37% - 17.52%) | 13.37%<br>(12.32% - 14.38%) | 12.23%<br>(11.24% - 13.26%) | 6.59%<br>(5.67% - 7.60%)   | 4.59%<br>(3.88% - 5.37%) | 3.49%<br>(2.89% - 4.13%) | 3.15%<br>(2.61% - 3.76%) | 1.12%<br>(0.79% - 1.56%) | 0.65%<br>(0.42% - 0.95%) | 0.42%<br>(0.23% - 0.63%) | 0.35%<br>(0.19% - 0.55%) |
| <i>Paraná</i>              | 9.44%<br>(8.55% - 10.42%)   | 7.58%<br>(6.84% - 8.36%)    | 6.40%<br>(5.82% - 7.07%)    | 5.69%<br>(5.17% - 6.31%)    | 1.40%<br>(1.07% - 1.77%)   | 1.12%<br>(0.86% - 1.42%) | 0.93%<br>(0.72% - 1.18%) | 0.83%<br>(0.64% - 1.05%) | 0.01%<br>(0.00% - 0.04%) | 0.00%<br>(0.00% - 0.01%) | 0.00%<br>(0.00% - 0.01%) | 0.00%<br>(0.00% - 0.00%) |
| <i>Pernambuco</i>          | 20.83%<br>(19.60% - 21.99%) | 15.34%<br>(14.31% - 16.36%) | 12.45%<br>(11.47% - 13.43%) | 11.10%<br>(10.20% - 12.01%) | 6.14%<br>(5.30% - 7.05%)   | 4.15%<br>(3.52% - 4.79%) | 3.20%<br>(2.69% - 3.75%) | 2.79%<br>(2.33% - 3.28%) | 1.00%<br>(0.71% - 1.34%) | 0.56%<br>(0.38% - 0.78%) | 0.37%<br>(0.22% - 0.54%) | 0.29%<br>(0.16% - 0.44%) |
| <i>Piauí</i>               | 25.35%<br>(24.04% - 26.55%) | 19.54%<br>(18.16% - 20.77%) | 15.89%<br>(14.57% - 17.06%) | 14.22%<br>(13.03% - 15.36%) | 8.49%<br>(7.25% - 9.70%)   | 5.87%<br>(4.89% - 6.86%) | 4.44%<br>(3.65% - 5.23%) | 3.88%<br>(3.18% - 4.64%) | 1.82%<br>(1.37% - 2.32%) | 1.08%<br>(0.77% - 1.46%) | 0.69%<br>(0.46% - 0.97%) | 0.56%<br>(0.36% - 0.81%) |
| <i>Rio de Janeiro</i>      | 9.62%<br>(8.70% - 10.61%)   | 6.96%<br>(6.34% - 7.61%)    | 5.89%<br>(5.36% - 6.48%)    | 5.40%<br>(4.94% - 5.90%)    | 1.57%<br>(1.21% - 1.95%)   | 1.09%<br>(0.88% - 1.34%) | 0.89%<br>(0.71% - 1.12%) | 0.81%<br>(0.63% - 1.00%) | 0.04%<br>(0.01% - 0.08%) | 0.01%<br>(0.00% - 0.03%) | 0.00%<br>(0.00% - 0.02%) | 0.00%<br>(0.00% - 0.01%) |
| <i>Rio Grande do Norte</i> | 16.98%<br>(15.69% - 18.25%) | 12.79%<br>(11.75% - 13.86%) | 10.19%<br>(9.36% - 11.16%)  | 9.34%<br>(8.54% - 10.22%)   | 4.21%<br>(3.39% - 5.07%)   | 3.01%<br>(2.43% - 3.60%) | 2.23%<br>(1.81% - 2.71%) | 2.03%<br>(1.63% - 2.52%) | 0.47%<br>(0.24% - 0.76%) | 0.27%<br>(0.12% - 0.47%) | 0.16%<br>(0.05% - 0.30%) | 0.13%<br>(0.03% - 0.27%) |
| <i>Rondônia</i>            | 19.11%<br>(17.44% - 20.95%) | 13.11%<br>(11.84% - 14.39%) | 9.89%<br>(8.95% - 10.93%)   | 9.02%<br>(8.11% - 10.04%)   | 3.62%<br>(2.88% - 4.49%)   | 2.18%<br>(1.73% - 2.76%) | 1.41%<br>(1.07% - 1.81%) | 1.32%<br>(0.99% - 1.68%) | 0.47%<br>(0.25% - 0.74%) | 0.17%<br>(0.06% - 0.32%) | 0.05%<br>(0.00% - 0.14%) | 0.04%<br>(0.00% - 0.12%) |
| <i>Roraima</i>             | 17.33%<br>(16.10% - 18.64%) | 12.00%<br>(11.02% - 13.01%) | 9.14%<br>(8.29% - 10.03%)   | 8.61%<br>(7.88% - 9.45%)    | 5.88%<br>(5.02% - 6.82%)   | 3.25%<br>(2.72% - 3.83%) | 2.11%<br>(1.72% - 2.54%) | 1.99%<br>(1.63% - 2.39%) | 1.24%<br>(0.88% - 1.65%) | 0.42%<br>(0.25% - 0.63%) | 0.14%<br>(0.05% - 0.26%) | 0.12%<br>(0.04% - 0.24%) |
| <i>Rio Grande do Sul</i>   | 12.89%<br>(11.78% - 14.05%) | 9.57%<br>(8.75% - 10.49%)   | 7.56%<br>(6.83% - 8.32%)    | 7.01%<br>(6.34% - 7.77%)    | 3.24%<br>(2.66% - 3.92%)   | 2.14%<br>(1.75% - 2.60%) | 1.52%<br>(1.22% - 1.86%) | 1.42%<br>(1.13% - 1.76%) | 0.40%<br>(0.22% - 0.65%) | 0.17%<br>(0.07% - 0.31%) | 0.07%<br>(0.01% - 0.16%) | 0.06%<br>(0.00% - 0.15%) |
| <i>Santa Catarina</i>      | 9.45%<br>(8.51% - 10.39%)   | 6.90%<br>(6.20% - 7.65%)    | 5.29%<br>(4.76% - 5.89%)    | 4.82%<br>(4.30% - 5.36%)    | 2.03%<br>(1.57% - 2.55%)   | 1.20%<br>(0.91% - 1.56%) | 0.77%<br>(0.57% - 1.00%) | 0.71%<br>(0.54% - 0.93%) | 0.20%<br>(0.06% - 0.37%) | 0.05%<br>(0.00% - 0.15%) | 0.01%<br>(0.00% - 0.04%) | 0.00%<br>(0.00% - 0.04%) |
| <i>Sergipe</i>             | 19.12%<br>(17.63% - 20.58%) | 13.40%<br>(12.24% - 14.59%) | 9.67%<br>(8.76% - 10.64%)   | 8.95%<br>(8.12% - 9.84%)    | 4.53%<br>(3.58% - 5.57%)   | 2.65%<br>(2.09% - 3.29%) | 1.64%<br>(1.25% - 2.05%) | 1.56%<br>(1.22% - 1.95%) | 0.46%<br>(0.23% - 0.77%) | 0.13%<br>(0.03% - 0.28%) | 0.03%<br>(0.00% - 0.11%) | 0.03%<br>(0.00% - 0.09%) |
| <i>São Paulo</i>           | 8.54%<br>(7.79% - 9.27%)    | 6.52%<br>(5.95% - 7.10%)    | 5.48%<br>(5.00% - 6.01%)    | 5.06%<br>(4.62% - 5.56%)    | 1.23%<br>(0.97% - 1.50%)   | 0.94%<br>(0.75% - 1.14%) | 0.76%<br>(0.60% - 0.93%) | 0.70%<br>(0.55% - 0.86%) | 0.03%<br>(0.01% - 0.07%) | 0.01%<br>(0.00% - 0.04%) | 0.00%<br>(0.00% - 0.02%) | 0.00%<br>(0.00% - 0.02%) |
| <i>Tocantins</i>           | 19.42%<br>(18.14% - 20.68%) | 13.77%<br>(12.67% - 14.96%) | 9.92%<br>(9.04% - 10.91%)   | 8.96%<br>(8.11% - 9.94%)    | 6.99%<br>(6.03% - 8.08%)   | 4.01%<br>(3.36% - 4.76%) | 2.41%<br>(1.97% - 2.94%) | 2.16%<br>(1.77% - 2.60%) | 1.64%<br>(1.22% - 2.15%) | 0.63%<br>(0.41% - 0.91%) | 0.21%<br>(0.09% - 0.37%) | 0.16%<br>(0.07% - 0.30%) |
| <i>Paraguay</i>            | 18.87%<br>(17.98% - 19.74%) | 15.86%<br>(14.94% - 16.82%) | 11.95%<br>(11.26% - 12.66%) | 7.60%<br>(6.98% - 8.23%)    | 4.68%<br>(4.07% - 5.36%)   | 3.84%<br>(3.25% - 4.44%) | 2.45%<br>(2.14% - 2.78%) | 1.13%<br>(0.90% - 1.36%) | 0.53%<br>(0.34% - 0.77%) | 0.39%<br>(0.22% - 0.57%) | 0.15%<br>(0.08% - 0.23%) | 0.01%<br>(0.00% - 0.03%) |

Table S8a. Estimated overall, severe, and extreme **stunting** prevalence (%) in children under 5 years, both sexes, in 1990, 2000, 2010, and 2020.

| Location                            | Total                       |                             |                             |                             | Severe                      |                             |                             |                             | Extreme                     |                             |                             |                            |
|-------------------------------------|-----------------------------|-----------------------------|-----------------------------|-----------------------------|-----------------------------|-----------------------------|-----------------------------|-----------------------------|-----------------------------|-----------------------------|-----------------------------|----------------------------|
|                                     | 1990                        | 2000                        | 2010                        | 2020                        | 1990                        | 2000                        | 2010                        | 2020                        | 1990                        | 2000                        | 2010                        | 2020                       |
| <b>North Africa and Middle East</b> | 31.27%<br>(30.87% - 31.68%) | 28.82%<br>(28.51% - 29.14%) | 24.72%<br>(24.39% - 25.04%) | 21.40%<br>(21.02% - 21.80%) | 13.38%<br>(12.96% - 13.81%) | 13.03%<br>(12.69% - 13.37%) | 10.50%<br>(10.17% - 10.84%) | 8.49%<br>(8.10% - 8.87%)    | 4.23%<br>(3.90% - 4.56%)    | 4.64%<br>(4.30% - 4.99%)    | 3.34%<br>(3.02% - 3.66%)    | 2.43%<br>(2.11% - 2.76%)   |
| <b>North Africa and Middle East</b> | 31.27%<br>(30.87% - 31.68%) | 28.82%<br>(28.51% - 29.14%) | 24.72%<br>(24.39% - 25.04%) | 21.40%<br>(21.02% - 21.80%) | 13.38%<br>(12.96% - 13.81%) | 13.03%<br>(12.69% - 13.37%) | 10.50%<br>(10.17% - 10.84%) | 8.49%<br>(8.10% - 8.87%)    | 4.23%<br>(3.90% - 4.56%)    | 4.64%<br>(4.30% - 4.99%)    | 3.34%<br>(3.02% - 3.66%)    | 2.43%<br>(2.11% - 2.76%)   |
| Algeria                             | 31.00%<br>(29.59% - 32.41%) | 26.81%<br>(25.63% - 27.98%) | 17.34%<br>(16.22% - 18.41%) | 13.96%<br>(12.78% - 15.04%) | 11.16%<br>(9.60% - 12.64%)  | 9.56%<br>(8.44% - 10.79%)   | 4.88%<br>(4.12% - 5.65%)    | 3.63%<br>(2.95% - 4.34%)    | 2.38%<br>(1.64% - 3.24%)    | 2.06%<br>(1.54% - 2.69%)    | 0.69%<br>(0.43% - 0.97%)    | 0.42%<br>(0.21% - 0.65%)   |
| Bahrain                             | 15.61%<br>(14.41% - 16.73%) | 12.98%<br>(11.94% - 14.06%) | 10.65%<br>(9.73% - 11.61%)  | 9.65%<br>(8.73% - 10.58%)   | 4.04%<br>(3.30% - 4.80%)    | 3.26%<br>(2.67% - 3.88%)    | 2.64%<br>(2.14% - 3.15%)    | 2.36%<br>(1.91% - 2.86%)    | 0.47%<br>(0.28% - 0.69%)    | 0.34%<br>(0.18% - 0.52%)    | 0.24%<br>(0.12% - 0.40%)    | 0.20%<br>(0.09% - 0.35%)   |
| Egypt                               | 33.92%<br>(32.96% - 34.86%) | 28.95%<br>(28.02% - 29.85%) | 23.65%<br>(22.70% - 24.66%) | 18.29%<br>(17.20% - 19.47%) | 17.00%<br>(15.75% - 18.27%) | 12.29%<br>(11.29% - 13.30%) | 9.14%<br>(8.30% - 10.02%)   | 6.28%<br>(5.49% - 7.17%)    | 6.24%<br>(5.20% - 7.34%)    | 3.53%<br>(2.94% - 4.18%)    | 2.34%<br>(1.90% - 2.81%)    | 1.34%<br>(0.99% - 1.74%)   |
| Iran (Islamic Republic of)          | 26.05%<br>(24.86% - 27.24%) | 19.21%<br>(18.40% - 20.02%) | 13.97%<br>(13.04% - 14.83%) | 11.88%<br>(10.87% - 12.91%) | 9.33%<br>(8.22% - 10.44%)   | 6.62%<br>(6.00% - 7.27%)    | 4.37%<br>(3.82% - 4.94%)    | 3.49%<br>(2.89% - 4.10%)    | 2.50%<br>(1.93% - 3.15%)    | 1.60%<br>(1.31% - 1.91%)    | 0.90%<br>(0.69% - 1.16%)    | 0.64%<br>(0.44% - 0.87%)   |
| Iraq                                | 29.09%<br>(27.99% - 30.10%) | 28.41%<br>(27.78% - 29.18%) | 24.25%<br>(23.28% - 25.23%) | 18.04%<br>(16.90% - 19.20%) | 11.39%<br>(10.21% - 12.64%) | 11.70%<br>(10.96% - 12.62%) | 9.55%<br>(8.68% - 10.50%)   | 6.10%<br>(5.26% - 6.93%)    | 2.90%<br>(2.31% - 3.58%)    | 3.20%<br>(2.81% - 3.70%)    | 2.50%<br>(2.06% - 2.99%)    | 1.27%<br>(0.94% - 1.64%)   |
| Jordan                              | 18.71%<br>(17.74% - 19.69%) | 13.20%<br>(12.38% - 14.12%) | 9.85%<br>(9.11% - 10.63%)   | 8.84%<br>(8.00% - 9.77%)    | 4.12%<br>(3.41% - 4.82%)    | 2.41%<br>(1.95% - 2.89%)    | 1.65%<br>(1.32% - 1.98%)    | 1.42%<br>(1.11% - 1.81%)    | 0.32%<br>(0.16% - 0.52%)    | 0.08%<br>(0.02% - 0.17%)    | 0.02%<br>(0.00% - 0.07%)    | 0.02%<br>(0.00% - 0.07%)   |
| Kuwait                              | 8.66%<br>(8.04% - 9.35%)    | 5.88%<br>(5.52% - 6.25%)    | 4.53%<br>(4.26% - 4.83%)    | 4.13%<br>(3.78% - 4.51%)    | 1.28%<br>(1.05% - 1.53%)    | 0.69%<br>(0.58% - 0.81%)    | 0.44%<br>(0.37% - 0.53%)    | 0.41%<br>(0.31% - 0.50%)    | 0.01%<br>(0.00% - 0.03%)    | 0.00%<br>(0.00% - 0.00%)    | 0.00%<br>(0.00% - 0.01%)    | 0.00%<br>(0.00% - 0.01%)   |
| Lebanon                             | 20.92%<br>(19.61% - 22.15%) | 16.67%<br>(15.71% - 17.65%) | 13.84%<br>(12.83% - 14.73%) | 11.84%<br>(10.78% - 12.85%) | 6.52%<br>(5.48% - 7.50%)    | 4.87%<br>(4.17% - 5.55%)    | 3.49%<br>(2.91% - 4.06%)    | 2.88%<br>(2.35% - 3.41%)    | 1.15%<br>(0.79% - 1.55%)    | 0.75%<br>(0.52% - 1.01%)    | 0.38%<br>(0.23% - 0.56%)    | 0.27%<br>(0.14% - 0.43%)   |
| Libya                               | 27.73%<br>(26.34% - 29.16%) | 22.59%<br>(21.42% - 23.74%) | 20.13%<br>(18.99% - 21.30%) | 19.89%<br>(18.61% - 21.30%) | 8.98%<br>(7.42% - 10.37%)   | 7.57%<br>(6.60% - 8.67%)    | 6.96%<br>(6.01% - 7.86%)    | 6.74%<br>(5.66% - 7.86%)    | 1.86%<br>(1.35% - 2.49%)    | 1.62%<br>(1.23% - 2.06%)    | 1.54%<br>(1.17% - 1.96%)    | 1.44%<br>(1.05% - 1.93%)   |
| Morocco                             | 30.99%<br>(29.91% - 32.28%) | 26.01%<br>(25.03% - 27.02%) | 19.05%<br>(18.09% - 20.04%) | 15.00%<br>(13.97% - 16.08%) | 12.27%<br>(11.04% - 13.45%) | 9.49%<br>(8.50% - 10.50%)   | 5.46%<br>(4.68% - 6.19%)    | 4.02%<br>(3.38% - 4.70%)    | 3.04%<br>(2.25% - 3.90%)    | 2.14%<br>(1.63% - 2.71%)    | 0.81%<br>(0.56% - 1.11%)    | 0.51%<br>(0.31% - 0.75%)   |
| Palestine                           | 15.94%<br>(14.89% - 16.91%) | 14.06%<br>(13.32% - 14.80%) | 12.52%<br>(11.85% - 13.23%) | 8.86%<br>(8.13% - 9.62%)    | 3.20%<br>(2.54% - 3.87%)    | 3.02%<br>(2.58% - 3.47%)    | 2.61%<br>(2.20% - 3.09%)    | 1.56%<br>(1.24% - 1.88%)    | 0.20%<br>(0.09% - 0.34%)    | 0.21%<br>(0.12% - 0.32%)    | 0.15%<br>(0.07% - 0.27%)    | 0.03%<br>(0.00% - 0.09%)   |
| Oman                                | 23.01%<br>(22.17% - 23.92%) | 14.31%<br>(13.70% - 14.90%) | 12.74%<br>(12.17% - 13.33%) | 12.62%<br>(11.79% - 13.52%) | 6.34%<br>(5.54% - 7.14%)    | 3.24%<br>(2.85% - 3.65%)    | 2.82%<br>(2.49% - 3.19%)    | 3.08%<br>(2.63% - 3.56%)    | 0.89%<br>(0.61% - 1.21%)    | 0.27%<br>(0.16% - 0.39%)    | 0.19%<br>(0.11% - 0.30%)    | 0.29%<br>(0.16% - 0.45%)   |
| Qatar                               | 14.95%<br>(13.75% - 16.21%) | 12.45%<br>(11.41% - 13.54%) | 10.15%<br>(9.24% - 11.10%)  | 8.88%<br>(8.04% - 9.77%)    | 3.71%<br>(2.96% - 4.49%)    | 3.04%<br>(2.48% - 3.65%)    | 2.45%<br>(2.00% - 2.94%)    | 2.15%<br>(1.74% - 2.62%)    | 0.38%<br>(0.19% - 0.61%)    | 0.28%<br>(0.14% - 0.46%)    | 0.19%<br>(0.08% - 0.34%)    | 0.16%<br>(0.06% - 0.30%)   |
| Saudi Arabia                        | 24.60%<br>(23.35% - 25.70%) | 16.24%<br>(15.28% - 17.27%) | 11.32%<br>(10.42% - 12.31%) | 9.43%<br>(8.54% - 10.40%)   | 8.05%<br>(6.93% - 9.23%)    | 4.44%<br>(3.74% - 5.12%)    | 2.70%<br>(2.22% - 3.22%)    | 2.23%<br>(1.79% - 2.70%)    | 1.55%<br>(1.13% - 2.06%)    | 0.60%<br>(0.39% - 0.83%)    | 0.24%<br>(0.12% - 0.39%)    | 0.18%<br>(0.07% - 0.31%)   |
| Syrian Arab Republic                | 35.82%<br>(34.57% - 37.04%) | 32.23%<br>(31.25% - 33.26%) | 28.29%<br>(27.21% - 29.36%) | 28.12%<br>(26.72% - 29.53%) | 18.31%<br>(16.75% - 20.00%) | 16.63%<br>(15.38% - 18.03%) | 13.67%<br>(12.49% - 14.73%) | 13.57%<br>(12.08% - 15.09%) | 6.87%<br>(5.68% - 8.27%)    | 6.41%<br>(5.50% - 7.47%)    | 4.85%<br>(4.06% - 5.62%)    | 4.81%<br>(3.82% - 5.88%)   |
| Tunisia                             | 23.55%<br>(22.68% - 24.46%) | 16.20%<br>(15.69% - 16.75%) | 10.81%<br>(10.25% - 11.40%) | 9.14%<br>(8.50% - 9.81%)    | 7.99%<br>(7.11% - 8.83%)    | 4.51%<br>(4.09% - 4.92%)    | 2.34%<br>(2.04% - 2.67%)    | 1.85%<br>(1.56% - 2.16%)    | 1.56%<br>(1.14% - 1.98%)    | 0.61%<br>(0.47% - 0.76%)    | 0.13%<br>(0.07% - 0.21%)    | 0.07%<br>(0.03% - 0.13%)   |
| Turkey                              | 23.88%<br>(22.57% - 25.28%) | 18.47%<br>(17.55% - 19.44%) | 12.27%<br>(11.40% - 13.15%) | 10.11%<br>(9.19% - 11.06%)  | 6.37%<br>(5.05% - 7.67%)    | 4.64%<br>(3.84% - 5.46%)    | 2.86%<br>(2.34% - 3.42%)    | 2.29%<br>(1.81% - 2.81%)    | 0.78%<br>(0.35% - 1.35%)    | 0.50%<br>(0.24% - 0.81%)    | 0.23%<br>(0.09% - 0.42%)    | 0.16%<br>(0.03% - 0.32%)   |
| United Arab Emirates                | 21.54%<br>(20.14% - 22.90%) | 18.10%<br>(16.96% - 19.31%) | 15.57%<br>(14.44% - 16.76%) | 13.91%<br>(12.79% - 15.22%) | 6.79%<br>(5.65% - 7.95%)    | 5.53%<br>(4.67% - 6.47%)    | 4.56%<br>(3.85% - 5.36%)    | 3.98%<br>(3.33% - 4.79%)    | 1.22%<br>(0.81% - 1.71%)    | 0.94%<br>(0.64% - 1.34%)    | 0.72%<br>(0.47% - 1.03%)    | 0.59%<br>(0.37% - 0.87%)   |
| Yemen                               | 52.36%<br>(50.26% - 54.86%) | 52.30%<br>(50.61% - 54.17%) | 48.14%<br>(46.41% - 50.13%) | 43.27%<br>(41.30% - 45.68%) | 28.51%<br>(26.35% - 30.69%) | 31.00%<br>(29.21% - 32.73%) | 23.70%<br>(22.58% - 24.87%) | 17.67%<br>(16.23% - 19.26%) | 10.49%<br>(8.20% - 13.08%)  | 13.65%<br>(11.32% - 16.42%) | 7.42%<br>(6.15% - 8.86%)    | 4.10%<br>(3.09% - 5.41%)   |
| Afghanistan                         | 50.86%<br>(49.54% - 52.47%) | 52.11%<br>(51.15% - 53.07%) | 48.55%<br>(47.37% - 49.88%) | 43.45%<br>(42.00% - 45.06%) | 31.01%<br>(28.62% - 33.64%) | 34.12%<br>(31.50% - 36.60%) | 29.33%<br>(27.01% - 31.54%) | 23.97%<br>(21.84% - 26.22%) | 15.33%<br>(12.18% - 18.81%) | 18.87%<br>(15.25% - 22.52%) | 14.22%<br>(11.36% - 17.15%) | 10.07%<br>(7.99% - 12.58%) |

Table S8a. Estimated overall, severe, and extreme **stunting** prevalence (%) in children under 5 years, both sexes, in 1990, 2000, 2010, and 2020.

| Location                   | Total                       |                             |                             |                             | Severe                      |                             |                             |                             | Extreme                     |                             |                             |                           |
|----------------------------|-----------------------------|-----------------------------|-----------------------------|-----------------------------|-----------------------------|-----------------------------|-----------------------------|-----------------------------|-----------------------------|-----------------------------|-----------------------------|---------------------------|
|                            | 1990                        | 2000                        | 2010                        | 2020                        | 1990                        | 2000                        | 2010                        | 2020                        | 1990                        | 2000                        | 2010                        | 2020                      |
| Sudan                      | 41.09%<br>(39.51% - 42.91%) | 40.39%<br>(39.06% - 41.95%) | 36.07%<br>(34.93% - 37.37%) | 31.70%<br>(30.50% - 32.93%) | 21.14%<br>(19.39% - 23.03%) | 21.57%<br>(19.91% - 23.35%) | 17.06%<br>(15.52% - 18.52%) | 14.39%<br>(12.90% - 15.92%) | 7.75%<br>(6.00% - 9.74%)    | 8.40%<br>(6.67% - 10.36%)   | 5.55%<br>(4.18% - 7.01%)    | 4.50%<br>(3.31% - 5.89%)  |
| <b>South Asia</b>          | 54.77%<br>(54.15% - 55.34%) | 49.82%<br>(49.29% - 50.35%) | 43.42%<br>(43.10% - 43.77%) | 35.57%<br>(35.20% - 35.94%) | 30.49%<br>(29.87% - 31.10%) | 27.98%<br>(27.41% - 28.57%) | 22.94%<br>(22.56% - 23.34%) | 16.81%<br>(16.39% - 17.26%) | 12.01%<br>(11.16% - 12.94%) | 11.91%<br>(11.00% - 13.08%) | 9.00%<br>(8.48% - 9.56%)    | 5.76%<br>(5.30% - 6.24%)  |
| <b>South Asia</b>          | 54.77%<br>(54.15% - 55.34%) | 49.82%<br>(49.29% - 50.35%) | 43.42%<br>(43.10% - 43.77%) | 35.57%<br>(35.20% - 35.94%) | 30.49%<br>(29.87% - 31.10%) | 27.98%<br>(27.41% - 28.57%) | 22.94%<br>(22.56% - 23.34%) | 16.81%<br>(16.39% - 17.26%) | 12.01%<br>(11.16% - 12.94%) | 11.91%<br>(11.00% - 13.08%) | 9.00%<br>(8.48% - 9.56%)    | 5.76%<br>(5.30% - 6.24%)  |
| Bangladesh                 | 57.07%<br>(54.72% - 59.45%) | 46.66%<br>(45.78% - 47.66%) | 38.13%<br>(37.17% - 39.25%) | 31.71%<br>(30.40% - 32.99%) | 27.25%<br>(24.99% - 29.63%) | 24.78%<br>(23.07% - 26.65%) | 16.01%<br>(14.90% - 17.22%) | 11.28%<br>(9.81% - 12.70%)  | 7.01%<br>(5.19% - 9.44%)    | 9.31%<br>(7.57% - 11.40%)   | 4.21%<br>(3.38% - 5.19%)    | 2.32%<br>(1.55% - 3.17%)  |
| Bhutan                     | 55.68%<br>(53.04% - 58.10%) | 45.09%<br>(42.28% - 48.02%) | 31.59%<br>(30.11% - 33.57%) | 23.72%<br>(22.22% - 25.23%) | 22.98%<br>(20.00% - 26.49%) | 16.98%<br>(15.12% - 19.19%) | 10.52%<br>(9.23% - 11.77%)  | 7.23%<br>(5.82% - 8.67%)    | 4.35%<br>(3.00% - 6.36%)    | 3.19%<br>(2.36% - 4.21%)    | 1.88%<br>(1.29% - 2.59%)    | 1.17%<br>(0.63% - 1.83%)  |
| India                      | 54.70%<br>(54.04% - 55.28%) | 50.69%<br>(50.09% - 51.25%) | 44.33%<br>(44.04% - 44.66%) | 35.94%<br>(35.63% - 36.26%) | 31.50%<br>(30.83% - 32.12%) | 29.31%<br>(28.72% - 30.05%) | 24.09%<br>(23.70% - 24.50%) | 17.48%<br>(17.09% - 17.93%) | 13.20%<br>(12.16% - 14.34%) | 13.11%<br>(11.99% - 14.60%) | 9.68%<br>(9.15% - 10.31%)   | 6.09%<br>(5.65% - 6.59%)  |
| Other Union Territories    | 42.51%<br>(40.76% - 44.38%) | 37.45%<br>(36.09% - 38.92%) | 29.51%<br>(28.50% - 30.52%) | 23.48%<br>(22.51% - 24.45%) | 17.28%<br>(15.96% - 18.59%) | 14.89%<br>(13.63% - 16.16%) | 11.35%<br>(10.25% - 12.36%) | 8.48%<br>(7.61% - 9.32%)    | 4.74%<br>(3.91% - 5.60%)    | 4.02%<br>(3.26% - 4.85%)    | 2.93%<br>(2.36% - 3.50%)    | 2.00%<br>(1.60% - 2.44%)  |
| Andhra Pradesh             | 50.74%<br>(48.52% - 53.13%) | 44.92%<br>(43.48% - 46.58%) | 38.70%<br>(38.06% - 39.36%) | 30.61%<br>(29.84% - 31.42%) | 22.97%<br>(21.40% - 24.90%) | 19.40%<br>(18.20% - 20.64%) | 17.87%<br>(17.02% - 18.75%) | 13.07%<br>(12.11% - 14.08%) | 5.92%<br>(4.69% - 7.65%)    | 4.88%<br>(4.03% - 5.94%)    | 5.52%<br>(4.82% - 6.31%)    | 3.76%<br>(3.11% - 4.48%)  |
| Arunachal Pradesh          | 48.74%<br>(47.53% - 50.17%) | 42.86%<br>(41.84% - 43.90%) | 38.42%<br>(37.63% - 39.20%) | 31.96%<br>(30.94% - 33.02%) | 30.87%<br>(28.33% - 33.37%) | 25.02%<br>(23.35% - 26.86%) | 21.90%<br>(20.62% - 23.25%) | 16.21%<br>(14.97% - 17.56%) | 15.67%<br>(12.04% - 19.36%) | 11.27%<br>(9.28% - 13.57%)  | 9.68%<br>(8.37% - 11.06%)   | 6.10%<br>(5.16% - 7.25%)  |
| Assam                      | 53.49%<br>(51.90% - 55.63%) | 50.31%<br>(48.92% - 52.05%) | 43.06%<br>(42.09% - 44.24%) | 33.78%<br>(32.63% - 34.84%) | 34.16%<br>(31.73% - 36.75%) | 30.55%<br>(28.69% - 32.37%) | 21.56%<br>(20.44% - 22.66%) | 14.87%<br>(13.75% - 16.06%) | 17.26%<br>(13.29% - 21.84%) | 14.51%<br>(11.86% - 17.19%) | 7.43%<br>(6.38% - 8.60%)    | 4.41%<br>(3.59% - 5.26%)  |
| Bihar                      | 59.23%<br>(57.15% - 62.02%) | 56.33%<br>(54.81% - 58.38%) | 51.99%<br>(50.71% - 53.51%) | 43.71%<br>(42.65% - 45.01%) | 42.40%<br>(39.23% - 45.47%) | 38.31%<br>(35.80% - 40.52%) | 30.64%<br>(29.30% - 32.03%) | 23.34%<br>(21.86% - 24.93%) | 25.58%<br>(18.57% - 32.66%) | 21.41%<br>(16.67% - 25.68%) | 13.13%<br>(11.12% - 15.29%) | 8.92%<br>(7.31% - 10.77%) |
| Chhattisgarh               | 54.83%<br>(52.38% - 57.33%) | 52.57%<br>(50.58% - 54.77%) | 46.84%<br>(45.61% - 48.20%) | 34.21%<br>(33.36% - 35.16%) | 30.30%<br>(27.98% - 32.69%) | 29.35%<br>(27.41% - 31.35%) | 23.71%<br>(22.63% - 24.83%) | 15.06%<br>(13.96% - 16.07%) | 11.69%<br>(9.07% - 14.81%)  | 11.86%<br>(9.52% - 14.63%)  | 8.24%<br>(7.10% - 9.51%)    | 4.44%<br>(3.66% - 5.24%)  |
| Delhi                      | 53.55%<br>(51.30% - 55.93%) | 49.42%<br>(47.37% - 51.76%) | 39.51%<br>(38.40% - 40.73%) | 30.95%<br>(29.85% - 32.15%) | 29.28%<br>(26.98% - 31.67%) | 26.42%<br>(24.53% - 28.54%) | 20.22%<br>(18.88% - 21.67%) | 14.26%<br>(12.82% - 15.82%) | 10.53%<br>(8.13% - 13.09%)  | 9.56%<br>(7.74% - 11.73%)   | 7.39%<br>(6.19% - 8.82%)    | 4.58%<br>(3.55% - 5.77%)  |
| Goa                        | 40.79%<br>(39.52% - 42.36%) | 32.04%<br>(31.00% - 33.06%) | 24.66%<br>(23.91% - 25.40%) | 20.66%<br>(19.90% - 21.48%) | 18.45%<br>(17.14% - 19.92%) | 12.47%<br>(11.40% - 13.61%) | 9.05%<br>(8.37% - 9.79%)    | 7.20%<br>(6.55% - 7.88%)    | 5.39%<br>(4.23% - 6.77%)    | 3.01%<br>(2.41% - 3.74%)    | 2.05%<br>(1.71% - 2.42%)    | 1.51%<br>(1.22% - 1.84%)  |
| Gujarat                    | 56.54%<br>(54.70% - 58.48%) | 52.11%<br>(50.71% - 53.70%) | 45.44%<br>(44.60% - 46.27%) | 36.01%<br>(35.25% - 36.79%) | 33.44%<br>(31.57% - 35.47%) | 28.75%<br>(27.45% - 30.26%) | 23.41%<br>(22.53% - 24.34%) | 16.84%<br>(15.80% - 17.95%) | 13.82%<br>(11.28% - 17.19%) | 10.93%<br>(9.52% - 12.55%)  | 8.46%<br>(7.57% - 9.43%)    | 5.50%<br>(4.68% - 6.49%)  |
| Haryana                    | 55.92%<br>(53.21% - 58.63%) | 51.39%<br>(49.65% - 53.50%) | 41.89%<br>(41.24% - 42.64%) | 33.04%<br>(32.26% - 33.87%) | 29.39%<br>(27.20% - 31.71%) | 28.33%<br>(26.60% - 30.10%) | 21.66%<br>(20.79% - 22.55%) | 15.29%<br>(14.36% - 16.25%) | 9.47%<br>(7.19% - 13.13%)   | 10.98%<br>(8.58% - 13.73%)  | 7.97%<br>(7.14% - 8.81%)    | 4.88%<br>(4.20% - 5.62%)  |
| Himachal Pradesh           | 51.38%<br>(49.36% - 53.90%) | 46.31%<br>(45.03% - 47.92%) | 39.06%<br>(38.19% - 40.05%) | 29.33%<br>(28.32% - 30.34%) | 27.26%<br>(24.99% - 29.81%) | 24.48%<br>(22.76% - 26.34%) | 18.95%<br>(17.87% - 20.04%) | 11.92%<br>(10.76% - 13.05%) | 10.17%<br>(7.69% - 13.33%)  | 9.52%<br>(7.47% - 11.80%)   | 6.50%<br>(5.54% - 7.50%)    | 3.19%<br>(2.51% - 3.97%)  |
| Jammu & Kashmir and Ladakh | 47.60%<br>(45.98% - 49.62%) | 43.07%<br>(41.96% - 44.33%) | 34.75%<br>(33.93% - 35.56%) | 27.16%<br>(26.22% - 28.16%) | 25.03%<br>(23.03% - 27.08%) | 22.89%<br>(21.33% - 24.50%) | 15.86%<br>(14.82% - 17.00%) | 11.07%<br>(10.09% - 12.08%) | 9.21%<br>(6.80% - 12.11%)   | 8.92%<br>(7.18% - 10.92%)   | 4.93%<br>(4.12% - 5.81%)    | 2.97%<br>(2.41% - 3.60%)  |
| Jharkhand                  | 54.42%<br>(52.32% - 56.85%) | 52.40%<br>(50.85% - 54.36%) | 48.80%<br>(47.83% - 49.92%) | 39.51%<br>(38.58% - 40.42%) | 32.21%<br>(29.71% - 34.97%) | 31.48%<br>(29.30% - 33.95%) | 28.38%<br>(27.04% - 29.88%) | 20.50%<br>(19.22% - 21.83%) | 13.96%<br>(10.35% - 18.83%) | 14.30%<br>(11.02% - 18.46%) | 12.34%<br>(10.53% - 14.44%) | 7.75%<br>(6.44% - 9.13%)  |
| Karnataka                  | 51.96%<br>(50.42% - 53.95%) | 46.50%<br>(45.52% - 47.62%) | 39.30%<br>(38.72% - 39.90%) | 31.96%<br>(31.18% - 32.75%) | 30.25%<br>(28.25% - 32.46%) | 25.55%<br>(24.26% - 27.01%) | 20.29%<br>(19.46% - 21.17%) | 14.51%<br>(13.55% - 15.48%) | 13.36%<br>(9.92% - 17.45%)  | 10.32%<br>(8.58% - 12.25%)  | 7.54%<br>(6.75% - 8.46%)    | 4.54%<br>(3.85% - 5.25%)  |
| Kerala                     | 41.65%<br>(39.81% - 44.13%) | 34.22%<br>(33.30% - 35.27%) | 24.48%<br>(23.84% - 25.11%) | 19.43%<br>(18.66% - 20.20%) | 16.04%<br>(14.75% - 17.45%) | 12.98%<br>(12.02% - 13.93%) | 8.53%<br>(7.94% - 9.13%)    | 6.40%<br>(5.81% - 6.98%)    | 3.43%<br>(2.58% - 4.54%)    | 2.93%<br>(2.32% - 3.61%)    | 1.77%<br>(1.51% - 2.06%)    | 1.25%<br>(1.02% - 1.51%)  |
| Madhya Pradesh             | 58.00%<br>(55.61% - 60.32%) | 54.59%<br>(53.30% - 56.42%) | 47.47%<br>(46.72% - 48.28%) | 37.24%<br>(36.46% - 38.05%) | 35.93%<br>(33.64% - 38.51%) | 35.22%<br>(33.50% - 37.22%) | 27.14%<br>(26.13% - 28.23%) | 18.56%<br>(17.46% - 19.76%) | 16.27%<br>(12.56% - 21.60%) | 17.92%<br>(14.65% - 21.73%) | 11.47%<br>(10.23% - 12.87%) | 6.54%<br>(5.56% - 7.63%)  |

Table S8a. Estimated overall, severe, and extreme **stunting** prevalence (%) in children under 5 years, both sexes, in 1990, 2000, 2010, and 2020.

| Location                                      | Total                       |                             |                             |                             | Severe                      |                             |                             |                             | Extreme                     |                             |                             |                            |
|-----------------------------------------------|-----------------------------|-----------------------------|-----------------------------|-----------------------------|-----------------------------|-----------------------------|-----------------------------|-----------------------------|-----------------------------|-----------------------------|-----------------------------|----------------------------|
|                                               | 1990                        | 2000                        | 2010                        | 2020                        | 1990                        | 2000                        | 2010                        | 2020                        | 1990                        | 2000                        | 2010                        | 2020                       |
| Maharashtra                                   | 53.66%<br>(51.43% - 55.99%) | 47.29%<br>(45.74% - 49.01%) | 38.36%<br>(37.71% - 39.10%) | 30.16%<br>(29.41% - 30.91%) | 27.99%<br>(26.19% - 29.87%) | 21.45%<br>(20.36% - 22.62%) | 16.50%<br>(15.77% - 17.24%) | 12.24%<br>(11.37% - 13.11%) | 9.23%<br>(7.12% - 12.30%)   | 5.74%<br>(4.82% - 6.76%)    | 4.41%<br>(3.84% - 5.04%)    | 3.19%<br>(2.67% - 3.76%)   |
| Manipur                                       | 44.37%<br>(42.60% - 46.58%) | 39.85%<br>(38.57% - 41.33%) | 35.15%<br>(34.36% - 35.91%) | 29.37%<br>(28.44% - 30.22%) | 21.11%<br>(19.38% - 22.96%) | 18.45%<br>(16.99% - 19.95%) | 15.86%<br>(14.94% - 16.87%) | 12.04%<br>(10.98% - 12.95%) | 6.59%<br>(4.72% - 8.85%)    | 5.85%<br>(4.50% - 7.41%)    | 4.83%<br>(4.12% - 5.65%)    | 3.22%<br>(2.57% - 3.86%)   |
| Meghalaya                                     | 56.66%<br>(54.55% - 58.98%) | 54.41%<br>(52.24% - 56.78%) | 49.86%<br>(48.34% - 51.75%) | 43.44%<br>(42.27% - 44.74%) | 38.82%<br>(36.23% - 41.56%) | 33.89%<br>(31.68% - 36.23%) | 30.66%<br>(29.01% - 32.35%) | 25.19%<br>(23.49% - 26.97%) | 21.45%<br>(16.68% - 27.34%) | 15.73%<br>(12.87% - 19.34%) | 14.41%<br>(12.10% - 16.98%) | 11.13%<br>(9.08% - 13.41%) |
| Mizoram                                       | 47.83%<br>(45.84% - 50.16%) | 41.56%<br>(40.48% - 42.89%) | 34.89%<br>(34.16% - 35.60%) | 28.08%<br>(27.25% - 28.98%) | 23.38%<br>(21.52% - 25.35%) | 21.48%<br>(19.95% - 23.05%) | 17.16%<br>(16.17% - 18.19%) | 12.05%<br>(11.12% - 13.08%) | 7.57%<br>(5.69% - 10.67%)   | 8.19%<br>(6.61% - 9.98%)    | 6.11%<br>(5.21% - 7.03%)    | 3.54%<br>(2.90% - 4.28%)   |
| Nagaland                                      | 41.14%<br>(39.66% - 42.86%) | 38.74%<br>(37.55% - 40.03%) | 35.26%<br>(34.42% - 36.12%) | 29.64%<br>(28.84% - 30.47%) | 20.47%<br>(18.62% - 22.33%) | 19.65%<br>(18.13% - 21.17%) | 17.75%<br>(16.61% - 18.92%) | 13.15%<br>(12.18% - 14.17%) | 7.19%<br>(5.40% - 9.34%)    | 7.36%<br>(5.86% - 9.15%)    | 6.54%<br>(5.49% - 7.69%)    | 4.07%<br>(3.29% - 4.88%)   |
| Odisha                                        | 53.27%<br>(51.32% - 55.76%) | 50.80%<br>(49.11% - 52.70%) | 43.33%<br>(42.38% - 44.45%) | 32.77%<br>(31.88% - 33.64%) | 29.84%<br>(27.82% - 32.09%) | 26.90%<br>(25.41% - 28.29%) | 21.60%<br>(20.58% - 22.64%) | 13.87%<br>(12.78% - 14.93%) | 11.63%<br>(8.89% - 15.05%)  | 9.75%<br>(7.92% - 11.60%)   | 7.41%<br>(6.33% - 8.59%)    | 3.85%<br>(3.09% - 4.58%)   |
| Punjab                                        | 48.01%<br>(46.55% - 49.60%) | 44.25%<br>(43.27% - 45.40%) | 36.41%<br>(35.81% - 37.00%) | 27.98%<br>(27.21% - 28.75%) | 24.20%<br>(22.72% - 25.65%) | 22.68%<br>(21.40% - 23.98%) | 17.31%<br>(16.58% - 18.06%) | 11.23%<br>(10.37% - 12.04%) | 8.02%<br>(6.45% - 9.77%)    | 8.02%<br>(6.70% - 9.36%)    | 5.69%<br>(5.07% - 6.37%)    | 2.92%<br>(2.43% - 3.44%)   |
| Rajasthan                                     | 53.08%<br>(51.96% - 54.59%) | 51.10%<br>(50.33% - 51.90%) | 43.46%<br>(42.88% - 44.07%) | 34.46%<br>(33.61% - 35.26%) | 36.27%<br>(34.26% - 38.15%) | 35.48%<br>(33.72% - 37.21%) | 26.07%<br>(24.89% - 27.27%) | 17.35%<br>(16.19% - 18.62%) | 20.81%<br>(17.11% - 24.24%) | 21.24%<br>(18.17% - 24.00%) | 12.41%<br>(11.00% - 13.90%) | 6.39%<br>(5.42% - 7.51%)   |
| Sikkim                                        | 49.02%<br>(46.87% - 51.59%) | 44.46%<br>(42.71% - 46.64%) | 35.02%<br>(34.23% - 35.81%) | 27.16%<br>(26.30% - 28.02%) | 26.13%<br>(23.86% - 28.49%) | 22.64%<br>(20.83% - 24.54%) | 15.66%<br>(14.75% - 16.57%) | 11.20%<br>(10.27% - 12.02%) | 9.61%<br>(7.15% - 12.52%)   | 7.93%<br>(6.07% - 9.94%)    | 4.75%<br>(4.06% - 5.46%)    | 3.12%<br>(2.61% - 3.62%)   |
| Tamil Nadu                                    | 42.52%<br>(40.72% - 44.69%) | 35.36%<br>(34.55% - 36.31%) | 28.84%<br>(28.31% - 29.40%) | 22.13%<br>(21.44% - 22.87%) | 17.11%<br>(15.75% - 18.53%) | 14.75%<br>(13.78% - 15.66%) | 11.96%<br>(11.35% - 12.58%) | 8.20%<br>(7.56% - 8.85%)    | 3.99%<br>(3.08% - 5.05%)    | 3.94%<br>(3.26% - 4.65%)    | 3.29%<br>(2.92% - 3.67%)    | 1.95%<br>(1.63% - 2.29%)   |
| Telangana                                     | 49.55%<br>(47.67% - 51.83%) | 44.63%<br>(43.33% - 46.08%) | 37.56%<br>(36.79% - 38.37%) | 28.12%<br>(27.19% - 28.98%) | 22.54%<br>(20.85% - 24.54%) | 19.49%<br>(17.90% - 21.08%) | 16.06%<br>(14.94% - 17.10%) | 11.12%<br>(10.12% - 12.11%) | 6.31%<br>(4.80% - 8.39%)    | 5.37%<br>(4.08% - 6.99%)    | 4.35%<br>(3.59% - 5.18%)    | 2.81%<br>(2.24% - 3.44%)   |
| Tripura                                       | 49.76%<br>(47.51% - 52.75%) | 43.22%<br>(41.92% - 44.85%) | 34.99%<br>(34.21% - 35.80%) | 28.09%<br>(27.13% - 29.10%) | 25.55%<br>(23.30% - 27.97%) | 22.22%<br>(20.53% - 23.95%) | 15.83%<br>(14.92% - 16.76%) | 11.27%<br>(10.32% - 12.31%) | 9.07%<br>(6.76% - 12.12%)   | 8.19%<br>(6.46% - 10.21%)   | 4.88%<br>(4.18% - 5.63%)    | 2.96%<br>(2.40% - 3.61%)   |
| Uttar Pradesh                                 | 64.63%<br>(61.88% - 66.53%) | 58.96%<br>(56.32% - 61.54%) | 52.79%<br>(51.72% - 54.18%) | 44.25%<br>(43.23% - 45.42%) | 41.23%<br>(38.66% - 43.82%) | 38.33%<br>(36.05% - 41.42%) | 32.64%<br>(31.16% - 34.12%) | 24.14%<br>(22.67% - 25.65%) | 17.49%<br>(14.27% - 23.53%) | 19.23%<br>(14.80% - 26.85%) | 15.48%<br>(13.18% - 17.96%) | 9.61%<br>(7.95% - 11.39%)  |
| Uttarakhand                                   | 50.44%<br>(48.58% - 52.65%) | 47.77%<br>(46.44% - 49.40%) | 39.92%<br>(39.17% - 40.72%) | 30.19%<br>(29.35% - 31.07%) | 27.44%<br>(25.22% - 29.82%) | 26.96%<br>(25.17% - 28.88%) | 19.83%<br>(18.78% - 20.85%) | 13.13%<br>(12.23% - 14.10%) | 10.51%<br>(7.86% - 13.82%)  | 11.47%<br>(9.09% - 14.28%)  | 6.89%<br>(5.95% - 7.91%)    | 3.87%<br>(3.27% - 4.55%)   |
| West Bengal                                   | 50.97%<br>(48.82% - 53.28%) | 46.32%<br>(45.00% - 47.95%) | 39.10%<br>(38.48% - 39.78%) | 30.80%<br>(29.98% - 31.59%) | 23.69%<br>(21.95% - 25.66%) | 21.86%<br>(20.68% - 23.25%) | 18.44%<br>(17.59% - 19.32%) | 12.89%<br>(11.93% - 13.87%) | 6.54%<br>(5.04% - 8.34%)    | 6.63%<br>(5.37% - 8.11%)    | 5.94%<br>(5.20% - 6.70%)    | 3.56%<br>(2.92% - 4.24%)   |
| Nepal                                         | 57.41%<br>(54.77% - 59.80%) | 52.35%<br>(49.76% - 54.82%) | 40.89%<br>(38.72% - 43.68%) | 32.20%<br>(30.41% - 34.42%) | 30.75%<br>(27.85% - 34.16%) | 25.76%<br>(23.68% - 27.95%) | 16.04%<br>(14.49% - 17.81%) | 10.53%<br>(9.01% - 11.97%)  | 9.72%<br>(6.93% - 13.78%)   | 7.25%<br>(5.49% - 9.35%)    | 3.36%<br>(2.42% - 4.63%)    | 1.76%<br>(1.09% - 2.64%)   |
| Pakistan                                      | 52.62%<br>(50.93% - 54.54%) | 47.38%<br>(45.54% - 49.62%) | 42.78%<br>(41.53% - 44.17%) | 36.35%<br>(35.02% - 37.77%) | 27.40%<br>(25.42% - 29.58%) | 23.80%<br>(22.08% - 25.61%) | 22.66%<br>(21.29% - 24.07%) | 17.56%<br>(16.12% - 19.19%) | 9.87%<br>(7.54% - 12.45%)   | 8.36%<br>(6.51% - 10.67%)   | 9.19%<br>(7.44% - 11.22%)   | 6.53%<br>(5.01% - 8.36%)   |
| <b>Southeast Asia, East Asia, and Oceania</b> | 34.30%<br>(33.25% - 35.43%) | 26.48%<br>(25.72% - 27.23%) | 21.21%<br>(20.72% - 21.79%) | 16.49%<br>(16.03% - 17.00%) | 12.28%<br>(11.29% - 13.33%) | 9.56%<br>(9.05% - 10.08%)   | 7.88%<br>(7.59% - 8.19%)    | 5.53%<br>(5.28% - 5.81%)    | 2.89%<br>(2.54% - 3.38%)    | 2.48%<br>(2.31% - 2.67%)    | 2.17%<br>(2.07% - 2.28%)    | 1.29%<br>(1.19% - 1.39%)   |
| <b>East Asia</b>                              | 30.00%<br>(28.44% - 31.71%) | 18.45%<br>(17.19% - 19.73%) | 11.07%<br>(10.17% - 12.08%) | 8.63%<br>(7.87% - 9.48%)    | 8.78%<br>(7.34% - 10.32%)   | 4.30%<br>(3.45% - 5.19%)    | 2.20%<br>(1.75% - 2.70%)    | 1.69%<br>(1.35% - 2.09%)    | 1.44%<br>(0.94% - 2.16%)    | 0.49%<br>(0.28% - 0.77%)    | 0.17%<br>(0.09% - 0.28%)    | 0.10%<br>(0.05% - 0.19%)   |
| China                                         | 30.01%<br>(28.40% - 31.77%) | 17.92%<br>(16.60% - 19.25%) | 10.67%<br>(9.75% - 11.72%)  | 8.43%<br>(7.63% - 9.30%)    | 8.73%<br>(7.25% - 10.32%)   | 3.96%<br>(3.06% - 4.92%)    | 2.04%<br>(1.57% - 2.56%)    | 1.63%<br>(1.28% - 2.04%)    | 1.42%<br>(0.90% - 2.18%)    | 0.39%<br>(0.18% - 0.69%)    | 0.13%<br>(0.05% - 0.26%)    | 0.09%<br>(0.03% - 0.18%)   |
| Democratic People's Republic of Korea         | 47.07%<br>(44.50% - 50.11%) | 45.43%<br>(43.59% - 47.71%) | 30.21%<br>(29.21% - 31.29%) | 23.57%<br>(22.25% - 24.79%) | 17.60%<br>(15.97% - 19.58%) | 17.83%<br>(16.32% - 19.47%) | 9.59%<br>(8.41% - 10.81%)   | 5.79%<br>(4.58% - 6.88%)    | 3.50%<br>(2.57% - 4.82%)    | 3.91%<br>(2.99% - 5.14%)    | 1.62%<br>(1.07% - 2.30%)    | 0.60%<br>(0.27% - 0.98%)   |
| Taiwan (Province of China)                    | 4.74%<br>(4.27% - 5.21%)    | 3.87%<br>(3.49% - 4.28%)    | 3.50%<br>(3.11% - 3.86%)    | 3.39%<br>(3.03% - 3.77%)    | 0.41%<br>(0.28% - 0.56%)    | 0.36%<br>(0.25% - 0.49%)    | 0.35%<br>(0.24% - 0.46%)    | 0.35%<br>(0.24% - 0.47%)    | 0.00%<br>(0.00% - 0.00%)    | 0.00%<br>(0.00% - 0.00%)    | 0.00%<br>(0.00% - 0.00%)    | 0.00%<br>(0.00% - 0.00%)   |

Table S8a. Estimated overall, severe, and extreme **stunting** prevalence (%) in children under 5 years, both sexes, in 1990, 2000, 2010, and 2020.

| Location                         | Total                       |                             |                             |                             | Severe                      |                             |                             |                             | Extreme                    |                            |                          |                          |
|----------------------------------|-----------------------------|-----------------------------|-----------------------------|-----------------------------|-----------------------------|-----------------------------|-----------------------------|-----------------------------|----------------------------|----------------------------|--------------------------|--------------------------|
|                                  | 1990                        | 2000                        | 2010                        | 2020                        | 1990                        | 2000                        | 2010                        | 2020                        | 1990                       | 2000                       | 2010                     | 2020                     |
| <b>Oceania</b>                   | 36.89%<br>(35.32% - 38.90%) | 38.18%<br>(36.74% - 39.89%) | 38.39%<br>(37.55% - 39.43%) | 37.20%<br>(36.01% - 38.84%) | 15.83%<br>(14.50% - 17.32%) | 16.87%<br>(15.76% - 18.02%) | 18.49%<br>(17.82% - 19.25%) | 17.54%<br>(16.28% - 18.90%) | 4.37%<br>(3.19% - 5.98%)   | 4.82%<br>(3.87% - 5.97%)   | 6.12%<br>(5.38% - 6.95%) | 5.62%<br>(4.45% - 7.04%) |
| Fiji                             | 6.74%<br>(5.89% - 7.60%)    | 7.22%<br>(6.37% - 8.11%)    | 7.46%<br>(6.63% - 8.44%)    | 6.68%<br>(5.87% - 7.63%)    | 0.83%<br>(0.53% - 1.20%)    | 1.14%<br>(0.77% - 1.61%)    | 1.31%<br>(0.90% - 1.80%)    | 1.13%<br>(0.78% - 1.59%)    | 0.01%<br>(0.00% - 0.07%)   | 0.04%<br>(0.00% - 0.13%)   | 0.06%<br>(0.00% - 0.18%) | 0.03%<br>(0.00% - 0.14%) |
| Kiribati                         | 28.44%<br>(27.20% - 29.63%) | 22.57%<br>(21.00% - 23.96%) | 17.14%<br>(15.76% - 18.53%) | 15.29%<br>(14.15% - 16.48%) | 8.50%<br>(7.32% - 9.76%)    | 5.88%<br>(4.72% - 7.16%)    | 3.57%<br>(2.65% - 4.53%)    | 2.96%<br>(2.19% - 3.76%)    | 1.43%<br>(1.04% - 1.92%)   | 0.76%<br>(0.43% - 1.21%)   | 0.24%<br>(0.06% - 0.51%) | 0.15%<br>(0.03% - 0.36%) |
| Marshall Islands                 | 18.30%<br>(16.99% - 19.51%) | 17.15%<br>(15.78% - 18.57%) | 15.21%<br>(13.88% - 16.54%) | 13.56%<br>(12.39% - 14.81%) | 2.68%<br>(1.99% - 3.44%)    | 2.41%<br>(1.75% - 3.20%)    | 2.51%<br>(1.87% - 3.17%)    | 2.42%<br>(1.85% - 3.05%)    | 0.10%<br>(0.04% - 0.18%)   | 0.08%<br>(0.03% - 0.16%)   | 0.09%<br>(0.03% - 0.18%) | 0.10%<br>(0.04% - 0.20%) |
| Micronesia (Federated States of) | 20.91%<br>(19.35% - 22.43%) | 22.01%<br>(20.55% - 23.45%) | 21.04%<br>(19.69% - 22.44%) | 18.82%<br>(17.52% - 20.09%) | 3.96%<br>(2.91% - 5.09%)    | 5.69%<br>(4.54% - 6.98%)    | 6.40%<br>(5.22% - 7.65%)    | 5.54%<br>(4.57% - 6.60%)    | 0.21%<br>(0.05% - 0.49%)   | 0.67%<br>(0.31% - 1.12%)   | 1.05%<br>(0.63% - 1.61%) | 0.86%<br>(0.50% - 1.34%) |
| Papua New Guinea                 | 46.19%<br>(43.91% - 49.09%) | 46.10%<br>(44.12% - 48.48%) | 45.08%<br>(44.02% - 46.43%) | 42.46%<br>(41.00% - 44.53%) | 20.91%<br>(19.01% - 23.07%) | 21.25%<br>(19.74% - 22.86%) | 22.59%<br>(21.72% - 23.61%) | 20.58%<br>(19.00% - 22.30%) | 5.98%<br>(4.23% - 8.33%)   | 6.26%<br>(4.96% - 7.85%)   | 7.70%<br>(6.73% - 8.81%) | 6.73%<br>(5.25% - 8.52%) |
| Samoa                            | 7.29%<br>(6.51% - 8.12%)    | 6.53%<br>(5.85% - 7.26%)    | 5.48%<br>(4.89% - 6.09%)    | 4.84%<br>(4.27% - 5.45%)    | 0.80%<br>(0.56% - 1.10%)    | 0.74%<br>(0.53% - 0.98%)    | 0.55%<br>(0.37% - 0.76%)    | 0.46%<br>(0.29% - 0.67%)    | 0.00%<br>(0.00% - 0.00%)   | 0.00%<br>(0.00% - 0.00%)   | 0.00%<br>(0.00% - 0.00%) | 0.00%<br>(0.00% - 0.00%) |
| Solomon Islands                  | 32.59%<br>(31.36% - 34.02%) | 30.78%<br>(29.77% - 31.80%) | 29.80%<br>(28.97% - 30.71%) | 26.82%<br>(25.76% - 27.94%) | 11.84%<br>(10.42% - 13.16%) | 11.54%<br>(10.31% - 12.81%) | 11.68%<br>(10.82% - 12.60%) | 10.89%<br>(9.77% - 12.08%)  | 2.59%<br>(1.70% - 3.54%)   | 2.63%<br>(1.95% - 3.41%)   | 2.89%<br>(2.35% - 3.52%) | 2.96%<br>(2.28% - 3.76%) |
| Tonga                            | 2.50%<br>(2.24% - 2.80%)    | 5.07%<br>(4.39% - 5.73%)    | 8.51%<br>(7.71% - 9.32%)    | 7.92%<br>(7.17% - 8.75%)    | 0.00%<br>(0.00% - 0.01%)    | 0.29%<br>(0.14% - 0.47%)    | 1.24%<br>(0.97% - 1.54%)    | 1.21%<br>(0.94% - 1.53%)    | 0.00%<br>(0.00% - 0.00%)   | 0.00%<br>(0.00% - 0.00%)   | 0.00%<br>(0.00% - 0.02%) | 0.01%<br>(0.00% - 0.04%) |
| American Samoa                   | 12.99%<br>(11.82% - 14.18%) | 14.42%<br>(13.22% - 15.67%) | 14.80%<br>(13.66% - 16.04%) | 13.21%<br>(12.08% - 14.33%) | 2.63%<br>(2.02% - 3.28%)    | 3.63%<br>(2.92% - 4.44%)    | 4.19%<br>(3.43% - 5.03%)    | 3.61%<br>(2.88% - 4.33%)    | 0.13%<br>(0.02% - 0.30%)   | 0.38%<br>(0.17% - 0.65%)   | 0.60%<br>(0.33% - 0.92%) | 0.47%<br>(0.24% - 0.75%) |
| Vanuatu                          | 26.39%<br>(25.00% - 27.72%) | 25.66%<br>(24.39% - 26.86%) | 26.10%<br>(24.98% - 27.20%) | 25.01%<br>(23.70% - 26.36%) | 9.26%<br>(7.80% - 10.63%)   | 9.16%<br>(7.92% - 10.45%)   | 9.53%<br>(8.39% - 10.70%)   | 9.10%<br>(7.77% - 10.53%)   | 1.94%<br>(1.32% - 2.64%)   | 1.98%<br>(1.39% - 2.70%)   | 2.13%<br>(1.53% - 2.77%) | 2.04%<br>(1.36% - 2.81%) |
| Cook Islands                     | 11.16%<br>(10.20% - 12.22%) | 11.24%<br>(10.27% - 12.31%) | 11.06%<br>(10.03% - 12.10%) | 9.68%<br>(8.64% - 10.69%)   | 2.32%<br>(1.85% - 2.90%)    | 2.79%<br>(2.26% - 3.40%)    | 3.04%<br>(2.46% - 3.65%)    | 2.57%<br>(2.07% - 3.11%)    | 0.12%<br>(0.02% - 0.27%)   | 0.27%<br>(0.10% - 0.47%)   | 0.39%<br>(0.21% - 0.62%) | 0.30%<br>(0.14% - 0.50%) |
| Guam                             | 9.31%<br>(8.44% - 10.28%)   | 9.89%<br>(8.94% - 10.85%)   | 10.41%<br>(9.51% - 11.36%)  | 9.71%<br>(8.87% - 10.65%)   | 1.88%<br>(1.51% - 2.33%)    | 2.38%<br>(1.90% - 2.90%)    | 2.76%<br>(2.25% - 3.30%)    | 2.51%<br>(2.03% - 3.07%)    | 0.07%<br>(0.01% - 0.18%)   | 0.20%<br>(0.06% - 0.36%)   | 0.32%<br>(0.16% - 0.53%) | 0.27%<br>(0.12% - 0.46%) |
| Nauru                            | 18.60%<br>(17.29% - 19.99%) | 22.73%<br>(21.36% - 24.09%) | 21.55%<br>(20.29% - 22.76%) | 16.34%<br>(15.05% - 17.56%) | 4.69%<br>(3.74% - 5.67%)    | 6.51%<br>(5.30% - 7.77%)    | 6.83%<br>(5.82% - 7.97%)    | 4.90%<br>(4.06% - 5.76%)    | 0.53%<br>(0.26% - 0.88%)   | 0.96%<br>(0.56% - 1.50%)   | 1.22%<br>(0.82% - 1.75%) | 0.79%<br>(0.48% - 1.15%) |
| Niue                             | 12.79%<br>(11.56% - 14.04%) | 13.70%<br>(12.46% - 14.95%) | 13.67%<br>(12.52% - 14.89%) | 12.27%<br>(11.16% - 13.35%) | 2.69%<br>(2.07% - 3.42%)    | 3.49%<br>(2.74% - 4.29%)    | 3.88%<br>(3.15% - 4.69%)    | 3.36%<br>(2.74% - 4.02%)    | 0.16%<br>(0.03% - 0.35%)   | 0.38%<br>(0.15% - 0.66%)   | 0.55%<br>(0.31% - 0.88%) | 0.44%<br>(0.22% - 0.69%) |
| Northern Mariana Islands         | 9.23%<br>(8.37% - 10.12%)   | 9.64%<br>(8.84% - 10.51%)   | 11.04%<br>(10.04% - 12.03%) | 10.11%<br>(9.13% - 11.00%)  | 1.86%<br>(1.49% - 2.29%)    | 2.31%<br>(1.89% - 2.77%)    | 2.99%<br>(2.44% - 3.59%)    | 2.65%<br>(2.14% - 3.19%)    | 0.07%<br>(0.00% - 0.17%)   | 0.19%<br>(0.08% - 0.33%)   | 0.37%<br>(0.19% - 0.60%) | 0.30%<br>(0.13% - 0.49%) |
| Palau                            | 11.83%<br>(10.73% - 12.92%) | 12.67%<br>(11.60% - 13.71%) | 14.08%<br>(12.95% - 15.26%) | 12.24%<br>(11.15% - 13.37%) | 4.27%<br>(1.96% - 3.07%)    | 3.19%<br>(2.57% - 3.86%)    | 4.00%<br>(3.26% - 4.79%)    | 3.33%<br>(2.69% - 4.03%)    | 0.13%<br>(0.03% - 0.30%)   | 0.33%<br>(0.15% - 0.57%)   | 0.58%<br>(0.33% - 0.89%) | 0.43%<br>(0.21% - 0.69%) |
| Tokelau                          | 17.12%<br>(15.69% - 18.53%) | 17.34%<br>(15.95% - 18.62%) | 16.10%<br>(14.83% - 17.25%) | 13.43%<br>(12.16% - 14.63%) | 3.48%<br>(2.59% - 4.46%)    | 4.50%<br>(3.62% - 5.42%)    | 4.69%<br>(3.88% - 5.59%)    | 3.75%<br>(3.04% - 4.53%)    | 0.21%<br>(0.05% - 0.46%)   | 0.53%<br>(0.25% - 0.88%)   | 0.72%<br>(0.43% - 1.10%) | 0.52%<br>(0.28% - 0.83%) |
| Tuvalu                           | 14.50%<br>(13.19% - 15.92%) | 12.56%<br>(11.22% - 14.08%) | 11.54%<br>(10.32% - 12.80%) | 10.23%<br>(9.13% - 11.40%)  | 1.37%<br>(0.93% - 1.99%)    | 1.39%<br>(0.93% - 2.05%)    | 1.54%<br>(1.05% - 2.10%)    | 1.47%<br>(1.04% - 1.96%)    | 0.01%<br>(0.00% - 0.04%)   | 0.01%<br>(0.00% - 0.04%)   | 0.02%<br>(0.00% - 0.05%) | 0.02%<br>(0.00% - 0.05%) |
| <b>Southeast Asia</b>            | 43.38%<br>(42.77% - 44.03%) | 37.24%<br>(36.84% - 37.67%) | 32.44%<br>(32.17% - 32.75%) | 27.31%<br>(26.98% - 27.66%) | 19.65%<br>(19.16% - 20.19%) | 16.61%<br>(16.27% - 16.96%) | 14.13%<br>(13.83% - 14.42%) | 10.77%<br>(10.37% - 11.14%) | 5.96%<br>(5.58% - 6.38%)   | 5.16%<br>(4.88% - 5.45%)   | 4.38%<br>(4.18% - 4.58%) | 2.89%<br>(2.68% - 3.12%) |
| Cambodia                         | 51.83%<br>(49.33% - 54.47%) | 48.55%<br>(46.94% - 50.72%) | 39.30%<br>(37.83% - 41.02%) | 31.83%<br>(30.41% - 33.40%) | 29.01%<br>(26.31% - 31.65%) | 27.45%<br>(25.52% - 29.32%) | 17.69%<br>(16.35% - 19.13%) | 12.39%<br>(10.71% - 14.04%) | 11.20%<br>(8.26% - 14.61%) | 11.11%<br>(8.66% - 13.63%) | 5.07%<br>(3.92% - 6.38%) | 2.96%<br>(1.97% - 4.04%) |
| Indonesia                        | 46.99%<br>(46.23% - 47.83%) | 41.49%<br>(41.07% - 41.91%) | 37.92%<br>(37.71% - 38.13%) | 32.76%<br>(32.45% - 33.07%) | 22.98%<br>(22.40% - 23.58%) | 20.96%<br>(20.50% - 21.40%) | 19.51%<br>(19.26% - 19.76%) | 14.88%<br>(14.48% - 15.27%) | 7.81%<br>(7.27% - 8.39%)   | 7.69%<br>(7.27% - 8.10%)   | 7.36%<br>(7.13% - 7.61%) | 4.77%<br>(4.50% - 5.05%) |

Table S8a. Estimated overall, severe, and extreme **stunting** prevalence (%) in children under 5 years, both sexes, in 1990, 2000, 2010, and 2020.

| Location                       | Total                      |                            |                            |                            | Severe                     |                            |                            |                            | Extreme                    |                            |                            |                           |
|--------------------------------|----------------------------|----------------------------|----------------------------|----------------------------|----------------------------|----------------------------|----------------------------|----------------------------|----------------------------|----------------------------|----------------------------|---------------------------|
|                                | 1990                       | 2000                       | 2010                       | 2020                       | 1990                       | 2000                       | 2010                       | 2020                       | 1990                       | 2000                       | 2010                       | 2020                      |
| <i>Aceh</i>                    | 50.02<br>(48.43% - 52.16%) | 47.17<br>(45.95% - 48.63%) | 43.33<br>(42.41% - 44.28%) | 38.71<br>(37.45% - 40.05%) | 30.57<br>(28.02% - 33.27%) | 28.71<br>(26.53% - 30.86%) | 24.72<br>(23.39% - 26.15%) | 20.26<br>(18.49% - 22.12%) | 14.22<br>(10.92% - 18.07%) | 13.46<br>(10.89% - 16.24%) | 10.52<br>(9.18% - 12.09%)  | 7.68<br>(6.14% - 9.46%)   |
| <i>North Sumatra</i>           | 52.04<br>(49.38% - 55.14%) | 47.29<br>(45.87% - 48.94%) | 42.84<br>(42.26% - 43.46%) | 37.20<br>(36.06% - 38.35%) | 28.39<br>(26.05% - 30.84%) | 27.34<br>(25.53% - 29.27%) | 25.03<br>(24.07% - 25.98%) | 18.85<br>(17.23% - 20.48%) | 10.77<br>(8.33% - 13.67%)  | 11.80<br>(9.71% - 14.17%)  | 11.23<br>(10.20% - 12.33%) | 6.90<br>(5.56% - 8.32%)   |
| <i>West Sumatra</i>            | 45.47<br>(43.46% - 47.99%) | 41.15<br>(39.69% - 42.79%) | 37.81<br>(36.95% - 38.69%) | 32.41<br>(31.08% - 33.63%) | 21.32<br>(19.42% - 23.49%) | 19.51<br>(17.79% - 21.28%) | 18.00<br>(16.89% - 19.08%) | 13.24<br>(11.79% - 14.78%) | 6.46<br>(4.85% - 8.45%)    | 6.17<br>(4.72% - 7.83%)    | 5.83<br>(4.84% - 6.79%)    | 3.50<br>(2.68% - 4.48%)   |
| <i>Riau</i>                    | 40.38<br>(38.98% - 41.79%) | 36.41<br>(35.20% - 37.68%) | 34.15<br>(33.35% - 34.98%) | 31.11<br>(29.92% - 32.37%) | 22.44<br>(20.38% - 24.62%) | 19.54<br>(17.97% - 21.13%) | 18.06<br>(17.09% - 19.04%) | 15.58<br>(14.19% - 17.09%) | 9.44<br>(7.59% - 11.71%)   | 7.92<br>(6.60% - 9.38%)    | 7.23<br>(6.44% - 8.07%)    | 5.81<br>(4.74% - 6.97%)   |
| <i>Jambi</i>                   | 44.52<br>(43.09% - 46.10%) | 40.45<br>(39.28% - 41.70%) | 36.99<br>(36.29% - 37.68%) | 31.93<br>(30.73% - 33.12%) | 26.05<br>(23.71% - 28.42%) | 23.09<br>(21.40% - 24.85%) | 20.11<br>(19.20% - 21.03%) | 15.84<br>(14.37% - 17.28%) | 11.65<br>(9.08% - 14.30%)  | 10.11<br>(8.41% - 11.98%)  | 8.26<br>(7.36% - 9.27%)    | 5.75<br>(4.65% - 6.88%)   |
| <i>South Sumatra</i>           | 52.45<br>(49.84% - 55.74%) | 45.49<br>(44.28% - 46.97%) | 39.92<br>(39.20% - 40.68%) | 32.63<br>(31.29% - 33.84%) | 28.48<br>(25.94% - 31.23%) | 26.29<br>(24.35% - 28.44%) | 22.90<br>(21.81% - 24.05%) | 15.44<br>(13.88% - 16.98%) | 10.41<br>(7.65% - 13.88%)  | 11.37<br>(9.26% - 13.95%)  | 10.08<br>(8.90% - 11.29%)  | 5.15<br>(4.04% - 6.28%)   |
| <i>Bengkulu</i>                | 43.96<br>(42.57% - 45.39%) | 40.14<br>(38.91% - 41.37%) | 36.11<br>(35.30% - 36.88%) | 31.47<br>(30.20% - 32.70%) | 26.31<br>(24.07% - 28.69%) | 23.18<br>(21.42% - 25.13%) | 19.94<br>(18.87% - 21.00%) | 16.34<br>(14.81% - 17.81%) | 12.27<br>(9.89% - 15.18%)  | 10.35<br>(8.57% - 12.35%)  | 8.42<br>(7.38% - 9.50%)    | 6.39<br>(5.20% - 7.60%)   |
| <i>Lampung</i>                 | 50.06<br>(47.45% - 53.19%) | 43.04<br>(41.64% - 44.66%) | 38.48<br>(37.58% - 39.37%) | 32.74<br>(31.49% - 34.01%) | 24.87<br>(22.55% - 27.41%) | 23.15<br>(21.34% - 25.07%) | 21.22<br>(19.94% - 22.47%) | 15.65<br>(14.15% - 17.13%) | 8.15<br>(6.26% - 10.67%)   | 9.13<br>(7.21% - 11.15%)   | 8.84<br>(7.59% - 10.13%)   | 5.36<br>(4.32% - 6.48%)   |
| <i>Bangka-Belitung Islands</i> | 42.83<br>(41.28% - 44.75%) | 38.77<br>(37.50% - 40.16%) | 32.94<br>(32.06% - 33.83%) | 27.27<br>(26.02% - 28.56%) | 20.98<br>(19.02% - 23.05%) | 18.89<br>(17.32% - 20.54%) | 14.51<br>(13.52% - 15.49%) | 11.31<br>(9.92% - 12.55%)  | 6.96<br>(5.30% - 8.97%)    | 6.37<br>(5.04% - 7.90%)    | 4.26<br>(3.54% - 5.00%)    | 3.17<br>(2.40% - 3.96%)   |
| <i>Riau Islands</i>            | 37.19<br>(35.32% - 39.47%) | 30.76<br>(29.33% - 32.23%) | 28.05<br>(27.05% - 29.13%) | 24.36<br>(23.07% - 25.72%) | 14.42<br>(12.50% - 16.42%) | 11.64<br>(10.04% - 13.24%) | 10.36<br>(9.22% - 11.49%)  | 8.55<br>(7.29% - 9.76%)    | 3.36<br>(2.34% - 4.70%)    | 2.73<br>(1.93% - 3.68%)    | 2.36<br>(1.82% - 2.97%)    | 1.82<br>(1.28% - 2.42%)   |
| <i>North Kalimantan</i>        | 50.92<br>(48.82% - 53.57%) | 45.18<br>(43.82% - 47.00%) | 40.67<br>(39.75% - 41.74%) | 36.65<br>(35.42% - 37.87%) | 28.45<br>(26.02% - 31.21%) | 24.96<br>(23.07% - 26.95%) | 21.28<br>(20.06% - 22.37%) | 18.17<br>(16.43% - 19.85%) | 11.24<br>(8.55% - 14.57%)  | 10.05<br>(7.98% - 12.39%)  | 7.99<br>(6.80% - 9.15%)    | 6.41<br>(5.00% - 7.98%)   |
| <i>Jakarta</i>                 | 37.16<br>(35.63% - 39.05%) | 30.91<br>(29.89% - 32.00%) | 28.25<br>(27.66% - 28.90%) | 24.55<br>(23.40% - 25.73%) | 15.61<br>(13.93% - 17.35%) | 12.99<br>(11.74% - 14.26%) | 12.45<br>(11.77% - 13.12%) | 9.52<br>(8.38% - 10.66%)   | 4.18<br>(3.05% - 5.43%)    | 3.60<br>(2.81% - 4.43%)    | 3.73<br>(3.26% - 4.23%)    | 2.37<br>(1.79% - 2.99%)   |
| <i>West Java</i>               | 46.60<br>(44.07% - 49.62%) | 39.52<br>(38.07% - 41.16%) | 36.34<br>(35.71% - 36.98%) | 31.88<br>(30.86% - 33.02%) | 20.07<br>(18.03% - 22.13%) | 17.41<br>(16.02% - 18.90%) | 17.38<br>(16.61% - 18.19%) | 13.35<br>(12.02% - 14.72%) | 5.38<br>(3.85% - 7.51%)    | 4.99<br>(3.96% - 6.19%)    | 5.76<br>(5.15% - 6.40%)    | 3.72<br>(2.92% - 4.64%)   |
| <i>Central Java</i>            | 48.36<br>(45.44% - 51.63%) | 41.39<br>(40.04% - 42.96%) | 37.14<br>(36.59% - 37.73%) | 31.18<br>(30.05% - 32.28%) | 20.68<br>(18.78% - 22.72%) | 19.38<br>(18.00% - 20.93%) | 18.59<br>(17.99% - 19.25%) | 13.34<br>(12.02% - 14.53%) | 5.44<br>(4.15% - 7.19%)    | 6.15<br>(4.98% - 7.49%)    | 6.59<br>(6.01% - 7.24%)    | 3.85<br>(3.02% - 4.66%)   |
| <i>Yogyakarta</i>              | 40.13<br>(37.88% - 42.97%) | 32.75<br>(31.52% - 34.16%) | 29.23<br>(28.49% - 30.03%) | 25.52<br>(24.38% - 26.69%) | 16.50<br>(14.65% - 18.38%) | 12.88<br>(11.52% - 14.39%) | 11.29<br>(10.44% - 12.16%) | 9.18<br>(8.06% - 10.31%)   | 4.49<br>(3.32% - 5.83%)    | 3.21<br>(2.40% - 4.20%)    | 2.71<br>(2.22% - 3.27%)    | 2.00<br>(1.45% - 2.60%)   |
| <i>East Java</i>               | 43.94<br>(42.04% - 46.53%) | 39.67<br>(38.36% - 41.18%) | 37.02<br>(36.22% - 37.76%) | 31.63<br>(30.41% - 32.85%) | 21.11<br>(19.12% - 23.10%) | 19.26<br>(17.60% - 20.74%) | 18.94<br>(17.93% - 19.89%) | 13.78<br>(12.35% - 15.28%) | 6.92<br>(5.39% - 8.59%)    | 6.55<br>(5.29% - 7.90%)    | 6.98<br>(6.13% - 7.89%)    | 4.03<br>(3.11% - 5.10%)   |
| <i>Banten</i>                  | 45.91<br>(44.03% - 48.20%) | 41.74<br>(40.36% - 43.33%) | 37.52<br>(36.69% - 38.42%) | 31.93<br>(30.65% - 33.21%) | 24.46<br>(22.21% - 26.77%) | 22.58<br>(20.64% - 24.52%) | 19.27<br>(18.14% - 20.37%) | 14.14<br>(12.62% - 15.65%) | 9.26<br>(7.05% - 11.86%)   | 9.01<br>(7.14% - 10.96%)   | 7.21<br>(6.20% - 8.24%)    | 4.34<br>(3.33% - 5.43%)   |
| <i>Bali</i>                    | 44.38<br>(42.68% - 46.29%) | 36.51<br>(35.29% - 37.74%) | 32.85<br>(32.17% - 33.61%) | 27.65<br>(26.47% - 28.88%) | 22.34<br>(20.33% - 24.46%) | 16.95<br>(15.52% - 18.54%) | 15.49<br>(14.72% - 16.35%) | 11.14<br>(9.92% - 12.30%)  | 7.73<br>(5.88% - 10.00%)   | 5.32<br>(4.21% - 6.60%)    | 5.09<br>(4.46% - 5.80%)    | 2.93<br>(2.23% - 3.65%)   |
| <i>West Nusa Tenggara</i>      | 57.01<br>(54.90% - 59.25%) | 52.42<br>(50.57% - 54.66%) | 46.21<br>(45.10% - 47.56%) | 40.47<br>(39.21% - 41.86%) | 35.88<br>(32.71% - 39.18%) | 31.71<br>(29.22% - 34.29%) | 26.45<br>(24.90% - 27.97%) | 20.03<br>(18.06% - 21.74%) | 16.80<br>(12.18% - 21.68%) | 14.30<br>(11.00% - 18.02%) | 11.25<br>(9.37% - 13.25%)  | 6.97<br>(5.41% - 8.59%)   |
| <i>East Nusa Tenggara</i>      | 52.40<br>(50.52% - 54.90%) | 49.44<br>(48.02% - 51.11%) | 46.63<br>(45.52% - 47.94%) | 41.94<br>(40.68% - 43.29%) | 32.78<br>(29.71% - 36.07%) | 30.70<br>(28.38% - 33.28%) | 24.07<br>(26.62% - 30.14%) | 24.07<br>(22.10% - 26.12%) | 15.91<br>(11.76% - 20.78%) | 14.89<br>(11.72% - 18.42%) | 13.34<br>(11.29% - 15.84%) | 10.60<br>(8.60% - 12.83%) |
| <i>West Kalimantan</i>         | 48.54<br>(46.71% - 50.73%) | 44.64<br>(43.32% - 46.10%) | 41.17<br>(40.37% - 41.98%) | 34.90<br>(33.68% - 36.16%) | 28.19<br>(25.72% - 30.91%) | 25.55<br>(23.62% - 27.51%) | 23.07<br>(22.07% - 24.14%) | 17.78<br>(16.15% - 19.42%) | 12.13<br>(9.30% - 15.70%)  | 10.96<br>(8.87% - 13.28%)  | 9.70<br>(8.56% - 10.89%)   | 6.59<br>(5.27% - 8.11%)   |
| <i>Central Kalimantan</i>      | 49.16<br>(47.36% - 51.26%) | 45.29<br>(44.11% - 46.67%) | 42.25<br>(41.38% - 43.12%) | 36.70<br>(35.43% - 37.95%) | 28.82<br>(26.34% - 31.54%) | 26.66<br>(24.79% - 28.56%) | 23.61<br>(22.36% - 24.86%) | 18.55<br>(16.83% - 20.25%) | 12.59<br>(9.62% - 16.30%)  | 11.98<br>(9.78% - 14.32%)  | 9.85<br>(8.52% - 11.31%)   | 6.76<br>(5.38% - 8.35%)   |
|                                | 52.45                      | 47.75                      | 44.86                      | 36.94                      | 22.96                      | 20.84                      | 17.14                      | 12.49                      | 5.80                       | 5.60                       | 3.77                       | 2.53                      |

Table S8a. Estimated overall, severe, and extreme **stunting** prevalence (%) in children under 5 years, both sexes, in 1990, 2000, 2010, and 2020.

| Location                                | Total             |                   |                   |                   | Severe            |                   |                   |                   | Extreme           |                   |                   |                  |
|-----------------------------------------|-------------------|-------------------|-------------------|-------------------|-------------------|-------------------|-------------------|-------------------|-------------------|-------------------|-------------------|------------------|
|                                         | 1990              | 2000              | 2010              | 2020              | 1990              | 2000              | 2010              | 2020              | 1990              | 2000              | 2010              | 2020             |
| <i>South Kalimantan</i>                 | (49.41% - 56.05%) | (45.15% - 50.80%) | (42.45% - 47.86%) | (35.17% - 39.09%) | (20.73% - 25.54%) | (18.74% - 22.92%) | (15.39% - 19.11%) | (10.52% - 14.37%) | (4.32% - 8.08%)   | (4.04% - 7.64%)   | (2.61% - 5.38%)   | (1.54% - 3.63%)  |
|                                         | 41.69%            | 37.85%            | 32.31%            | 26.97%            | 20.55%            | 18.57%            | 14.40%            | 10.81%            | 6.93%             | 6.37%             | 4.32%             | 2.82%            |
| <i>East Kalimantan</i>                  | (40.17% - 43.53%) | (36.62% - 39.11%) | (31.46% - 33.11%) | (25.74% - 28.26%) | (18.45% - 22.66%) | (16.95% - 20.24%) | (13.39% - 15.38%) | (9.49% - 12.10%)  | (5.21% - 9.05%)   | (5.05% - 7.83%)   | (3.68% - 5.00%)   | (2.12% - 3.59%)  |
|                                         | 41.88%            | 35.90%            | 33.92%            | 29.89%            | 19.34%            | 15.79%            | 14.72%            | 12.46%            | 5.81%             | 4.58%             | 4.22%             | 3.43%            |
| <i>North Sulawesi</i>                   | (40.15% - 44.12%) | (34.51% - 37.26%) | (33.00% - 35.02%) | (28.55% - 31.18%) | (17.30% - 21.40%) | (14.15% - 17.38%) | (13.66% - 15.78%) | (11.04% - 13.94%) | (4.33% - 7.57%)   | (3.51% - 5.77%)   | (3.46% - 4.99%)   | (2.59% - 4.47%)  |
|                                         | 48.56%            | 44.94%            | 41.94%            | 35.64%            | 28.81%            | 26.26%            | 24.00%            | 17.89%            | 12.89%            | 11.65%            | 10.40%            | 6.47%            |
| <i>Central Sulawesi</i>                 | (46.89% - 50.65%) | (43.70% - 46.34%) | (41.04% - 42.82%) | (34.35% - 37.00%) | (26.29% - 31.14%) | (24.42% - 28.36%) | (22.59% - 25.40%) | (16.26% - 19.63%) | (9.84% - 15.94%)  | (9.58% - 14.35%)  | (8.98% - 11.96%)  | (5.16% - 8.03%)  |
|                                         | 50.30%            | 42.41%            | 38.55%            | 32.81%            | 19.46%            | 17.69%            | 17.57%            | 13.31%            | 4.04%             | 4.77%             | 5.38%             | 3.51%            |
| <i>South Sulawesi</i>                   | (46.75% - 53.88%) | (40.39% - 45.22%) | (37.24% - 40.15%) | (31.36% - 34.35%) | (17.16% - 22.41%) | (16.07% - 19.46%) | (16.02% - 19.26%) | (11.60% - 14.94%) | (3.05% - 5.32%)   | (3.66% - 6.19%)   | (4.19% - 6.79%)   | (2.52% - 4.58%)  |
|                                         | 46.50%            | 43.73%            | 40.05%            | 35.29%            | 27.32%            | 25.48%            | 22.28%            | 18.26%            | 12.20%            | 11.38%            | 9.37%             | 6.98%            |
| <i>Southeast Sulawesi</i>               | (44.83% - 48.21%) | (42.48% - 45.10%) | (39.19% - 40.93%) | (34.05% - 36.46%) | (24.93% - 29.79%) | (23.51% - 27.43%) | (21.03% - 23.55%) | (16.70% - 19.94%) | (9.41% - 15.36%)  | (9.31% - 13.77%)  | (8.13% - 10.75%)  | (5.68% - 8.44%)  |
|                                         | 46.85%            | 44.28%            | 41.97%            | 34.75%            | 26.23%            | 24.97%            | 23.20%            | 16.81%            | 10.69%            | 10.46%            | 9.50%             | 5.76%            |
| <i>Gorontalo</i>                        | (45.05% - 48.86%) | (42.87% - 45.71%) | (40.93% - 43.11%) | (33.34% - 36.02%) | (23.91% - 28.69%) | (23.00% - 27.13%) | (21.62% - 24.87%) | (15.07% - 18.46%) | (8.14% - 13.72%)  | (8.34% - 12.90%)  | (7.90% - 11.23%)  | (4.47% - 7.11%)  |
|                                         | 49.28%            | 46.80%            | 44.22%            | 37.92%            | 30.70%            | 29.38%            | 26.64%            | 20.60%            | 14.94%            | 14.65%            | 12.52%            | 8.44%            |
| <i>West Sulawesi</i>                    | (47.78% - 51.16%) | (45.57% - 48.15%) | (43.27% - 45.27%) | (36.71% - 39.13%) | (28.17% - 33.44%) | (27.43% - 31.68%) | (25.35% - 28.01%) | (18.82% - 22.46%) | (11.68% - 18.81%) | (12.07% - 17.67%) | (10.89% - 14.27%) | (6.73% - 10.31%) |
|                                         | 45.20%            | 43.25%            | 42.53%            | 36.93%            | 24.86%            | 24.38%            | 23.33%            | 18.66%            | 9.95%             | 10.31%            | 9.42%             | 6.79%            |
| <i>Maluku</i>                           | (43.52% - 47.36%) | (41.97% - 44.73%) | (41.59% - 43.60%) | (35.62% - 38.21%) | (22.63% - 27.18%) | (22.54% - 26.32%) | (22.02% - 24.63%) | (16.99% - 20.41%) | (7.62% - 12.71%)  | (8.29% - 12.61%)  | (8.03% - 10.78%)  | (5.43% - 8.37%)  |
|                                         | 44.67%            | 41.35%            | 39.15%            | 34.75%            | 23.92%            | 22.05%            | 19.73%            | 16.22%            | 9.11%             | 8.50%             | 7.00%             | 5.23%            |
| <i>North Maluku</i>                     | (42.90% - 46.82%) | (39.99% - 42.87%) | (38.10% - 40.25%) | (33.45% - 36.11%) | (21.63% - 26.10%) | (20.43% - 23.81%) | (18.67% - 20.83%) | (14.73% - 17.74%) | (7.00% - 11.52%)  | (6.95% - 10.22%)  | (5.95% - 8.03%)   | (4.09% - 6.48%)  |
|                                         | 45.90%            | 42.00%            | 39.13%            | 33.39%            | 22.55%            | 20.60%            | 19.15%            | 14.91%            | 7.36%             | 6.90%             | 6.51%             | 4.52%            |
| <i>West Papua</i>                       | (43.87% - 48.58%) | (40.39% - 43.92%) | (37.53% - 40.80%) | (31.99% - 34.78%) | (20.35% - 24.82%) | (18.64% - 22.76%) | (17.28% - 21.15%) | (13.16% - 16.65%) | (5.56% - 9.84%)   | (5.16% - 9.00%)   | (5.03% - 8.29%)   | (3.39% - 5.78%)  |
|                                         | 43.44%            | 40.71%            | 40.45%            | 36.11%            | 24.26%            | 22.57%            | 22.94%            | 19.16%            | 10.08%            | 9.40%             | 9.91%             | 7.58%            |
| <i>Papua</i>                            | (42.09% - 44.86%) | (39.51% - 41.98%) | (39.47% - 41.37%) | (34.83% - 37.36%) | (22.17% - 26.57%) | (20.71% - 24.63%) | (21.41% - 24.46%) | (17.41% - 21.05%) | (7.85% - 12.72%)  | (7.55% - 11.52%)  | (8.35% - 11.52%)  | (6.05% - 9.32%)  |
|                                         | 53.22%            | 50.37%            | 43.28%            | 34.69%            | 28.14%            | 25.40%            | 19.34%            | 13.92%            | 9.52%             | 8.04%             | 5.25%             | 3.41%            |
| <i>Lao People's Democratic Republic</i> | (51.00% - 55.58%) | (48.21% - 52.58%) | (41.38% - 45.74%) | (33.16% - 36.46%) | (25.71% - 30.74%) | (23.60% - 27.50%) | (17.88% - 20.96%) | (12.26% - 15.60%) | (7.18% - 12.51%)  | (6.41% - 10.04%)  | (3.99% - 6.84%)   | (2.31% - 4.70%)  |
|                                         | 34.11%            | 23.77%            | 19.84%            | 18.28%            | 12.84%            | 7.16%             | 5.76%             | 5.41%             | 2.88%             | 1.16%             | 0.87%             | 0.85%            |
| <i>Malaysia</i>                         | (32.99% - 35.32%) | (22.72% - 24.91%) | (18.85% - 20.85%) | (17.31% - 19.29%) | (11.53% - 14.16%) | (6.06% - 8.24%)   | (4.91% - 6.58%)   | (4.70% - 6.18%)   | (2.14% - 3.69%)   | (0.79% - 1.60%)   | (0.59% - 1.17%)   | (0.62% - 1.15%)  |
|                                         | 42.49%            | 33.83%            | 21.19%            | 17.73%            | 21.64%            | 15.59%            | 6.87%             | 4.81%             | 7.82%             | 5.01%             | 1.33%             | 0.67%            |
| <i>Maldives</i>                         | (40.94% - 44.19%) | (32.60% - 35.13%) | (20.08% - 22.33%) | (16.54% - 18.89%) | (19.85% - 23.66%) | (14.13% - 17.14%) | (5.93% - 7.80%)   | (4.03% - 5.68%)   | (6.28% - 9.86%)   | (4.01% - 6.16%)   | (0.96% - 1.74%)   | (0.42% - 0.96%)  |
|                                         | 45.25%            | 41.14%            | 33.51%            | 26.07%            | 18.32%            | 16.35%            | 11.81%            | 8.26%             | 3.93%             | 3.58%             | 2.25%             | 1.41%            |
| <i>Myanmar</i>                          | (42.56% - 48.18%) | (39.19% - 43.40%) | (32.29% - 34.99%) | (24.70% - 27.43%) | (16.18% - 20.49%) | (14.98% - 17.82%) | (10.52% - 13.15%) | (6.85% - 9.59%)   | (2.81% - 5.52%)   | (2.75% - 4.67%)   | (1.58% - 3.09%)   | (0.80% - 2.11%)  |
|                                         | 39.76%            | 35.43%            | 31.50%            | 26.51%            | 16.13%            | 13.88%            | 12.11%            | 9.79%             | 4.40%             | 3.47%             | 2.97%             | 2.35%            |
| <i>Philippines</i>                      | (38.69% - 40.86%) | (34.45% - 36.55%) | (30.65% - 32.59%) | (25.45% - 27.66%) | (14.97% - 17.44%) | (12.92% - 14.99%) | (11.16% - 13.12%) | (8.51% - 11.03%)  | (3.71% - 5.22%)   | (2.86% - 4.23%)   | (2.29% - 3.71%)   | (1.61% - 3.09%)  |
|                                         | 45.27%            | 39.08%            | 32.74%            | 27.07%            | 18.20%            | 14.83%            | 12.06%            | 9.41%             | 4.61%             | 3.36%             | 2.67%             | 2.00%            |
| <i>Mountain Province</i>                | (42.17% - 48.72%) | (36.79% - 42.19%) | (31.16% - 34.82%) | (25.29% - 28.87%) | (15.85% - 20.91%) | (12.73% - 17.01%) | (10.52% - 13.60%) | (7.57% - 11.36%)  | (3.40% - 6.15%)   | (2.27% - 4.81%)   | (1.69% - 3.86%)   | (1.09% - 3.13%)  |
|                                         | 45.51%            | 37.68%            | 32.55%            | 26.68%            | 18.21%            | 14.25%            | 11.97%            | 9.34%             | 4.58%             | 3.24%             | 2.65%             | 2.02%            |
| <i>Ifugao</i>                           | (42.48% - 49.10%) | (35.68% - 40.33%) | (31.04% - 34.67%) | (24.92% - 28.38%) | (15.98% - 20.91%) | (12.23% - 16.30%) | (10.26% - 13.54%) | (7.47% - 11.13%)  | (3.35% - 6.20%)   | (2.14% - 4.57%)   | (1.63% - 3.76%)   | (1.13% - 3.10%)  |
|                                         | 42.50%            | 36.66%            | 32.48%            | 27.68%            | 16.94%            | 14.01%            | 12.22%            | 9.87%             | 4.37%             | 3.27%             | 2.81%             | 2.18%            |
| <i>Benguet</i>                          | (39.88% - 45.62%) | (34.61% - 39.12%) | (31.05% - 34.41%) | (25.82% - 29.46%) | (14.64% - 19.28%) | (12.03% - 16.10%) | (10.65% - 13.78%) | (7.94% - 11.70%)  | (3.13% - 5.96%)   | (2.19% - 4.63%)   | (1.74% - 3.95%)   | (1.22% - 3.27%)  |
|                                         | 41.72%            | 37.53%            | 32.74%            | 27.60%            | 16.73%            | 14.47%            | 12.20%            | 9.71%             | 4.37%             | 3.40%             | 2.76%             | 2.10%            |
| <i>Abra</i>                             | (39.18% - 44.95%) | (35.44% - 40.15%) | (31.14% - 34.75%) | (25.78% - 29.42%) | (14.58% - 18.97%) | (12.49% - 16.56%) | (10.48% - 13.71%) | (7.62% - 11.64%)  | (3.21% - 5.80%)   | (2.33% - 4.80%)   | (1.68% - 3.93%)   | (1.10% - 3.19%)  |
|                                         | 46.80%            | 40.69%            | 33.32%            | 27.11%            | 19.10%            | 15.39%            | 12.18%            | 9.46%             | 4.97%             | 3.43%             | 2.65%             | 2.02%            |
| <i>Apayao</i>                           | (43.76% - 50.47%) | (38.32% - 43.77%) | (31.71% - 35.43%) | (25.36% - 29.12%) | (16.79% - 21.77%) | (13.40% - 17.56%) | (10.52% - 13.88%) | (7.45% - 11.38%)  | (3.76% - 6.59%)   | (2.42% - 4.90%)   | (1.61% - 3.83%)   | (1.07% - 3.13%)  |
|                                         | 45.95%            | 38.39%            | 32.74%            | 27.64%            | 18.23%            | 14.50%            | 12.03%            | 9.67%             | 4.50%             | 3.28%             | 2.65%             | 2.07%            |
| <i>Kalinga</i>                          | (42.78% - 49.74%) | (36.20% - 41.09%) | (31.19% - 34.79%) | (25.75% - 29.47%) | (15.88% - 20.86%) | (12.41% - 16.72%) | (10.45% - 13.61%) | (7.56% - 11.59%)  | (3.31% - 5.99%)   | (2.15% - 4.80%)   | (1.68% - 3.78%)   | (1.11% - 3.16%)  |



Table S8a. Estimated overall, severe, and extreme **stunting** prevalence (%) in children under 5 years, both sexes, in 1990, 2000, 2010, and 2020.

| Location                  | Total                       |                             |                             |                             | Severe                      |                             |                             |                            | Extreme                  |                          |                          |                          |
|---------------------------|-----------------------------|-----------------------------|-----------------------------|-----------------------------|-----------------------------|-----------------------------|-----------------------------|----------------------------|--------------------------|--------------------------|--------------------------|--------------------------|
|                           | 1990                        | 2000                        | 2010                        | 2020                        | 1990                        | 2000                        | 2010                        | 2020                       | 1990                     | 2000                     | 2010                     | 2020                     |
| <i>La Union</i>           | 35.63%<br>(33.54% - 38.26%) | 31.25%<br>(29.53% - 33.11%) | 27.79%<br>(26.50% - 29.27%) | 23.24%<br>(21.53% - 24.95%) | 12.55%<br>(10.44% - 14.68%) | 10.59%<br>(8.67% - 12.57%)  | 9.05%<br>(7.42% - 10.49%)   | 7.32%<br>(5.54% - 8.97%)   | 2.85%<br>(1.96% - 3.97%) | 2.10%<br>(1.26% - 3.16%) | 1.67%<br>(0.90% - 2.53%) | 1.34%<br>(0.63% - 2.14%) |
| <i>Ilocos Norte</i>       | 33.20%<br>(31.36% - 35.23%) | 30.04%<br>(28.34% - 31.89%) | 27.27%<br>(25.86% - 28.80%) | 24.62%<br>(22.83% - 26.47%) | 11.35%<br>(9.31% - 13.34%)  | 9.87%<br>(7.76% - 11.69%)   | 8.80%<br>(7.19% - 10.34%)   | 7.59%<br>(5.65% - 9.40%)   | 2.52%<br>(1.77% - 3.48%) | 1.90%<br>(1.13% - 2.79%) | 1.61%<br>(0.89% - 2.45%) | 1.33%<br>(0.58% - 2.20%) |
| <i>Ilocos Sur</i>         | 36.02%<br>(33.91% - 38.68%) | 30.68%<br>(29.02% - 32.45%) | 27.82%<br>(26.52% - 29.41%) | 22.90%<br>(21.14% - 24.66%) | 12.54%<br>(10.22% - 14.72%) | 10.32%<br>(8.36% - 12.22%)  | 9.03%<br>(7.53% - 10.50%)   | 7.17%<br>(5.56% - 8.88%)   | 2.80%<br>(1.96% - 3.99%) | 2.03%<br>(1.21% - 3.09%) | 1.65%<br>(0.94% - 2.52%) | 1.30%<br>(0.62% - 2.20%) |
| <i>Pangasinan</i>         | 36.49%<br>(34.47% - 39.22%) | 32.41%<br>(30.55% - 34.53%) | 27.91%<br>(26.57% - 29.45%) | 22.64%<br>(20.81% - 24.48%) | 12.81%<br>(10.58% - 14.86%) | 10.91%<br>(8.98% - 12.79%)  | 9.11%<br>(7.50% - 10.62%)   | 7.07%<br>(5.41% - 8.73%)   | 2.89%<br>(1.97% - 3.96%) | 2.13%<br>(1.32% - 3.14%) | 1.69%<br>(0.91% - 2.56%) | 1.27%<br>(0.62% - 2.09%) |
| <i>Nueva Vizcaya</i>      | 36.12%<br>(34.23% - 38.39%) | 32.24%<br>(30.52% - 34.08%) | 28.71%<br>(27.45% - 30.14%) | 24.97%<br>(23.27% - 26.61%) | 13.71%<br>(11.48% - 15.88%) | 11.86%<br>(9.88% - 13.76%)  | 10.43%<br>(8.93% - 11.97%)  | 8.78%<br>(7.00% - 10.43%)  | 3.43%<br>(2.39% - 4.65%) | 2.69%<br>(1.69% - 3.83%) | 2.33%<br>(1.46% - 3.40%) | 1.92%<br>(1.06% - 2.90%) |
| <i>Cagayan</i>            | 38.34%<br>(36.24% - 41.17%) | 33.56%<br>(31.91% - 35.43%) | 29.19%<br>(27.96% - 30.71%) | 24.27%<br>(22.50% - 26.01%) | 14.49%<br>(12.39% - 16.76%) | 12.51%<br>(10.55% - 14.70%) | 10.69%<br>(9.07% - 12.18%)  | 8.52%<br>(6.63% - 10.23%)  | 3.58%<br>(2.46% - 5.03%) | 2.87%<br>(1.88% - 4.25%) | 2.41%<br>(1.46% - 3.42%) | 1.87%<br>(1.01% - 2.83%) |
| <i>Isabela</i>            | 38.25%<br>(36.18% - 40.97%) | 33.73%<br>(32.00% - 35.67%) | 29.04%<br>(27.77% - 30.57%) | 24.48%<br>(22.83% - 26.16%) | 14.46%<br>(12.39% - 16.58%) | 12.58%<br>(10.58% - 14.43%) | 10.59%<br>(9.03% - 12.06%)  | 8.57%<br>(6.94% - 10.23%)  | 3.59%<br>(2.55% - 4.95%) | 2.90%<br>(1.89% - 4.17%) | 2.37%<br>(1.45% - 3.35%) | 1.86%<br>(1.04% - 2.79%) |
| <i>Quirino</i>            | 41.29%<br>(38.92% - 44.44%) | 34.82%<br>(33.11% - 36.85%) | 29.59%<br>(28.20% - 31.12%) | 24.27%<br>(22.53% - 25.95%) | 16.08%<br>(14.06% - 18.39%) | 13.25%<br>(11.27% - 15.40%) | 10.89%<br>(9.26% - 12.47%)  | 8.63%<br>(6.95% - 10.44%)  | 4.07%<br>(2.94% - 5.45%) | 3.10%<br>(2.04% - 4.48%) | 2.47%<br>(1.54% - 3.53%) | 1.93%<br>(1.10% - 2.97%) |
| <i>Batanes</i>            | 39.43%<br>(37.31% - 42.44%) | 34.54%<br>(32.64% - 36.70%) | 29.02%<br>(27.71% - 30.43%) | 26.10%<br>(24.30% - 27.91%) | 15.29%<br>(13.19% - 17.49%) | 12.88%<br>(10.98% - 14.85%) | 10.65%<br>(9.10% - 12.06%)  | 9.17%<br>(7.21% - 11.12%)  | 3.96%<br>(2.86% - 5.45%) | 2.94%<br>(1.89% - 4.26%) | 2.41%<br>(1.53% - 3.36%) | 2.00%<br>(1.08% - 3.15%) |
| <i>Bataan</i>             | 29.85%<br>(28.02% - 31.62%) | 25.25%<br>(23.59% - 26.94%) | 22.22%<br>(20.98% - 23.52%) | 18.68%<br>(17.09% - 20.24%) | 10.29%<br>(8.22% - 12.26%)  | 8.24%<br>(6.68% - 9.83%)    | 6.94%<br>(5.70% - 8.20%)    | 5.56%<br>(4.28% - 6.93%)   | 2.26%<br>(1.53% - 3.19%) | 1.56%<br>(0.94% - 2.39%) | 1.22%<br>(0.68% - 1.87%) | 0.92%<br>(0.44% - 1.56%) |
| <i>Zambales</i>           | 27.97%<br>(26.35% - 29.60%) | 24.70%<br>(23.17% - 26.27%) | 22.24%<br>(21.04% - 23.52%) | 18.03%<br>(16.44% - 19.88%) | 9.53%<br>(7.76% - 11.35%)   | 7.99%<br>(6.38% - 9.56%)    | 6.94%<br>(5.70% - 8.14%)    | 5.39%<br>(4.13% - 6.76%)   | 2.06%<br>(1.39% - 2.93%) | 1.50%<br>(0.86% - 2.28%) | 1.22%<br>(0.67% - 1.81%) | 0.90%<br>(0.42% - 1.50%) |
| <i>Tarlac</i>             | 29.67%<br>(27.94% - 31.57%) | 25.14%<br>(23.62% - 26.81%) | 21.88%<br>(20.63% - 23.09%) | 18.60%<br>(16.93% - 20.30%) | 9.95%<br>(8.06% - 11.95%)   | 8.06%<br>(6.53% - 9.64%)    | 6.70%<br>(5.53% - 7.85%)    | 5.50%<br>(4.16% - 6.96%)   | 2.12%<br>(1.41% - 3.03%) | 1.49%<br>(0.89% - 2.25%) | 1.14%<br>(0.63% - 1.72%) | 0.90%<br>(0.41% - 1.53%) |
| <i>Pampanga</i>           | 29.27%<br>(27.53% - 31.11%) | 24.97%<br>(23.35% - 26.68%) | 21.58%<br>(20.39% - 22.87%) | 19.23%<br>(17.63% - 20.87%) | 9.77%<br>(7.96% - 11.53%)   | 7.92%<br>(6.38% - 9.52%)    | 6.59%<br>(5.40% - 7.82%)    | 5.64%<br>(4.24% - 7.06%)   | 2.07%<br>(1.42% - 2.90%) | 1.44%<br>(0.83% - 2.20%) | 1.12%<br>(0.61% - 1.73%) | 0.91%<br>(0.40% - 1.55%) |
| <i>Bulacan</i>            | 29.04%<br>(27.28% - 30.89%) | 24.43%<br>(22.90% - 25.98%) | 22.05%<br>(20.84% - 23.31%) | 17.80%<br>(16.18% - 19.34%) | 9.89%<br>(8.08% - 11.75%)   | 7.78%<br>(6.36% - 9.35%)    | 6.84%<br>(5.66% - 8.03%)    | 5.23%<br>(3.96% - 6.48%)   | 2.14%<br>(1.48% - 3.02%) | 1.42%<br>(0.87% - 2.15%) | 1.19%<br>(0.66% - 1.81%) | 0.85%<br>(0.37% - 1.41%) |
| <i>Nueva Ecija</i>        | 28.94%<br>(27.13% - 30.70%) | 25.37%<br>(23.80% - 26.99%) | 22.11%<br>(20.90% - 23.31%) | 17.40%<br>(15.88% - 18.95%) | 9.81%<br>(8.04% - 11.60%)   | 8.18%<br>(6.67% - 9.80%)    | 6.85%<br>(5.62% - 8.04%)    | 5.10%<br>(3.92% - 6.41%)   | 2.11%<br>(1.44% - 2.95%) | 1.52%<br>(0.91% - 2.28%) | 1.19%<br>(0.65% - 1.82%) | 0.82%<br>(0.38% - 1.41%) |
| <i>Aurora</i>             | 31.16%<br>(29.35% - 33.04%) | 27.20%<br>(25.61% - 29.00%) | 23.03%<br>(21.72% - 24.33%) | 18.45%<br>(16.79% - 19.99%) | 11.22%<br>(9.06% - 13.29%)  | 9.23%<br>(7.42% - 10.95%)   | 7.47%<br>(6.09% - 8.88%)    | 5.62%<br>(4.18% - 6.97%)   | 2.60%<br>(1.73% - 3.70%) | 1.85%<br>(1.10% - 2.78%) | 1.40%<br>(0.76% - 2.18%) | 0.97%<br>(0.42% - 1.61%) |
| <i>Rizal</i>              | 31.76%<br>(30.12% - 33.53%) | 28.49%<br>(26.94% - 30.07%) | 26.02%<br>(24.71% - 27.48%) | 21.43%<br>(19.78% - 23.08%) | 11.84%<br>(10.03% - 13.65%) | 10.06%<br>(8.32% - 11.67%)  | 8.91%<br>(7.46% - 10.27%)   | 6.98%<br>(5.38% - 8.50%)   | 2.94%<br>(2.10% - 3.95%) | 2.16%<br>(1.37% - 3.09%) | 1.81%<br>(1.07% - 2.60%) | 1.36%<br>(0.67% - 2.21%) |
| <i>Cavite</i>             | 30.78%<br>(28.94% - 32.55%) | 28.52%<br>(26.99% - 30.10%) | 25.83%<br>(24.61% - 27.23%) | 20.98%<br>(19.37% - 22.59%) | 11.29%<br>(9.32% - 13.12%)  | 10.05%<br>(8.37% - 11.77%)  | 8.81%<br>(7.49% - 10.09%)   | 6.82%<br>(5.41% - 8.29%)   | 2.73%<br>(1.90% - 3.74%) | 2.15%<br>(1.39% - 3.10%) | 1.78%<br>(1.09% - 2.56%) | 1.32%<br>(0.72% - 2.08%) |
| <i>Laguna</i>             | 31.66%<br>(29.96% - 33.33%) | 29.04%<br>(27.46% - 30.53%) | 25.66%<br>(24.51% - 27.05%) | 20.84%<br>(19.15% - 22.60%) | 11.54%<br>(9.73% - 13.46%)  | 10.20%<br>(8.56% - 11.81%)  | 8.73%<br>(7.38% - 10.12%)   | 6.76%<br>(5.27% - 8.20%)   | 2.78%<br>(1.97% - 3.76%) | 2.18%<br>(1.41% - 3.05%) | 1.76%<br>(1.07% - 2.59%) | 1.31%<br>(0.68% - 2.03%) |
| <i>Batangas</i>           | 33.79%<br>(32.00% - 35.86%) | 30.59%<br>(28.91% - 32.24%) | 25.56%<br>(24.38% - 26.83%) | 21.15%<br>(19.60% - 22.79%) | 12.29%<br>(10.25% - 14.27%) | 10.64%<br>(8.78% - 12.58%)  | 8.66%<br>(7.27% - 10.06%)   | 6.86%<br>(5.42% - 8.33%)   | 2.93%<br>(2.07% - 3.99%) | 2.21%<br>(1.38% - 3.27%) | 1.74%<br>(1.03% - 2.52%) | 1.33%<br>(0.71% - 2.08%) |
| <i>Quezon</i>             | 33.57%<br>(31.87% - 35.38%) | 29.67%<br>(28.05% - 31.40%) | 26.30%<br>(25.00% - 27.61%) | 21.49%<br>(19.83% - 23.28%) | 12.61%<br>(10.59% - 14.47%) | 10.61%<br>(8.81% - 12.33%)  | 9.17%<br>(7.77% - 10.59%)   | 7.08%<br>(5.46% - 8.74%)   | 3.10%<br>(2.14% - 4.21%) | 2.30%<br>(1.43% - 3.24%) | 1.93%<br>(1.15% - 2.80%) | 1.40%<br>(0.72% - 2.22%) |
| <i>Occidental Mindoro</i> | 40.50%<br>(38.55% - 43.13%) | 36.43%<br>(34.73% - 38.35%) | 33.52%<br>(32.13% - 35.22%) | 29.16%<br>(27.38% - 30.98%) | 17.55%<br>(15.41% - 19.94%) | 15.47%<br>(13.51% - 17.49%) | 13.96%<br>(12.47% - 15.58%) | 11.60%<br>(9.60% - 13.68%) | 5.24%<br>(3.92% - 7.10%) | 4.31%<br>(2.95% - 5.85%) | 3.79%<br>(2.61% - 5.11%) | 3.04%<br>(1.85% - 4.50%) |

Table S8a. Estimated overall, severe, and extreme **stunting** prevalence (%) in children under 5 years, both sexes, in 1990, 2000, 2010, and 2020.

| Location                 | Total                       |                             |                             |                             | Severe                      |                             |                             |                             | Extreme                  |                          |                          |                          |
|--------------------------|-----------------------------|-----------------------------|-----------------------------|-----------------------------|-----------------------------|-----------------------------|-----------------------------|-----------------------------|--------------------------|--------------------------|--------------------------|--------------------------|
|                          | 1990                        | 2000                        | 2010                        | 2020                        | 1990                        | 2000                        | 2010                        | 2020                        | 1990                     | 2000                     | 2010                     | 2020                     |
| <i>Oriental Mindoro</i>  | 42.53%<br>(40.22% - 45.59%) | 38.20%<br>(36.51% - 40.48%) | 33.79%<br>(32.38% - 35.49%) | 28.00%<br>(26.40% - 29.69%) | 18.57%<br>(16.31% - 20.93%) | 16.31%<br>(14.18% - 18.43%) | 14.23%<br>(12.60% - 15.92%) | 11.16%<br>(9.35% - 13.11%)  | 5.56%<br>(4.07% - 7.43%) | 4.54%<br>(3.15% - 6.13%) | 3.93%<br>(2.73% - 5.33%) | 2.96%<br>(1.82% - 4.31%) |
| <i>Romblon</i>           | 43.53%<br>(41.27% - 46.56%) | 39.01%<br>(37.09% - 41.39%) | 33.87%<br>(32.47% - 35.64%) | 28.07%<br>(26.41% - 29.84%) | 19.13%<br>(16.81% - 21.56%) | 16.64%<br>(14.49% - 18.87%) | 14.09%<br>(12.45% - 15.72%) | 11.14%<br>(9.24% - 13.08%)  | 5.74%<br>(4.24% - 7.58%) | 4.59%<br>(3.16% - 6.23%) | 3.82%<br>(2.59% - 5.24%) | 2.93%<br>(1.80% - 4.22%) |
| <i>Palawan</i>           | 41.62%<br>(39.47% - 44.50%) | 37.33%<br>(35.59% - 39.44%) | 33.77%<br>(32.41% - 35.45%) | 26.90%<br>(25.35% - 28.69%) | 18.12%<br>(15.98% - 20.45%) | 15.93%<br>(13.87% - 18.19%) | 14.03%<br>(12.35% - 15.57%) | 10.56%<br>(8.64% - 12.43%)  | 5.45%<br>(4.06% - 7.16%) | 4.45%<br>(3.12% - 6.10%) | 3.78%<br>(2.62% - 5.07%) | 2.74%<br>(1.66% - 3.96%) |
| <i>Marinduque</i>        | 42.93%<br>(40.67% - 45.75%) | 37.92%<br>(36.17% - 40.05%) | 33.90%<br>(32.47% - 35.74%) | 28.70%<br>(26.88% - 30.45%) | 18.64%<br>(16.36% - 21.05%) | 16.15%<br>(14.04% - 18.35%) | 14.09%<br>(12.48% - 15.66%) | 11.30%<br>(9.31% - 13.24%)  | 5.50%<br>(4.02% - 7.40%) | 4.47%<br>(3.00% - 6.14%) | 3.81%<br>(2.59% - 5.07%) | 2.93%<br>(1.70% - 4.25%) |
| <i>Catanduanes</i>       | 43.76%<br>(41.05% - 47.10%) | 38.30%<br>(36.31% - 41.11%) | 34.07%<br>(32.49% - 36.05%) | 29.72%<br>(27.96% - 31.63%) | 17.69%<br>(15.67% - 20.11%) | 15.00%<br>(13.06% - 17.16%) | 13.20%<br>(11.44% - 14.93%) | 11.04%<br>(9.02% - 13.09%)  | 4.63%<br>(3.41% - 6.24%) | 3.61%<br>(2.50% - 5.01%) | 3.16%<br>(1.95% - 4.51%) | 2.58%<br>(1.48% - 3.88%) |
| <i>Camarines Norte</i>   | 41.68%<br>(39.42% - 44.92%) | 36.97%<br>(35.14% - 39.31%) | 34.46%<br>(32.83% - 36.57%) | 28.05%<br>(26.32% - 29.83%) | 16.97%<br>(14.93% - 19.15%) | 14.50%<br>(12.54% - 16.60%) | 13.22%<br>(11.44% - 14.87%) | 10.27%<br>(8.20% - 12.31%)  | 4.57%<br>(3.41% - 6.09%) | 3.53%<br>(2.36% - 4.98%) | 3.10%<br>(1.89% - 4.36%) | 2.37%<br>(1.32% - 3.60%) |
| <i>Sorsogon</i>          | 44.74%<br>(41.93% - 48.43%) | 39.22%<br>(37.15% - 41.98%) | 34.49%<br>(32.92% - 36.49%) | 28.81%<br>(26.99% - 30.63%) | 18.33%<br>(16.06% - 20.93%) | 15.40%<br>(13.51% - 17.49%) | 13.38%<br>(11.64% - 15.10%) | 10.68%<br>(8.50% - 12.81%)  | 4.86%<br>(3.60% - 6.61%) | 3.69%<br>(2.52% - 5.21%) | 3.19%<br>(2.00% - 4.46%) | 2.51%<br>(1.34% - 3.83%) |
| <i>Albay</i>             | 43.59%<br>(40.87% - 47.16%) | 39.31%<br>(37.13% - 42.38%) | 34.38%<br>(32.78% - 36.42%) | 27.87%<br>(26.15% - 29.61%) | 17.86%<br>(15.59% - 20.32%) | 15.70%<br>(13.79% - 17.74%) | 13.48%<br>(11.83% - 15.14%) | 10.34%<br>(8.32% - 12.32%)  | 4.79%<br>(3.53% - 6.55%) | 3.88%<br>(2.69% - 5.42%) | 3.28%<br>(2.14% - 4.56%) | 2.44%<br>(1.40% - 3.73%) |
| <i>Masbate</i>           | 42.32%<br>(39.99% - 45.48%) | 39.19%<br>(37.13% - 42.17%) | 34.41%<br>(32.75% - 36.76%) | 28.19%<br>(26.44% - 29.92%) | 17.36%<br>(15.13% - 19.62%) | 15.51%<br>(13.46% - 17.89%) | 13.21%<br>(11.64% - 14.87%) | 10.33%<br>(8.32% - 12.26%)  | 4.73%<br>(3.39% - 6.34%) | 3.79%<br>(2.56% - 5.49%) | 3.10%<br>(2.08% - 4.33%) | 2.39%<br>(1.34% - 3.63%) |
| <i>Camarines Sur</i>     | 42.60%<br>(40.20% - 45.88%) | 38.23%<br>(36.18% - 40.96%) | 34.31%<br>(32.74% - 36.53%) | 28.22%<br>(26.50% - 29.90%) | 17.49%<br>(15.13% - 19.77%) | 15.27%<br>(13.25% - 17.39%) | 13.34%<br>(11.56% - 15.07%) | 10.48%<br>(8.59% - 12.33%)  | 4.76%<br>(3.40% - 6.37%) | 3.80%<br>(2.57% - 5.32%) | 3.21%<br>(2.02% - 4.52%) | 2.47%<br>(1.41% - 3.74%) |
| <i>Capiz</i>             | 46.23%<br>(43.24% - 50.33%) | 41.73%<br>(39.33% - 45.06%) | 36.41%<br>(34.85% - 38.82%) | 30.16%<br>(28.42% - 32.03%) | 19.16%<br>(16.64% - 21.75%) | 16.80%<br>(14.63% - 19.13%) | 14.61%<br>(12.93% - 16.41%) | 11.76%<br>(9.75% - 13.90%)  | 5.21%<br>(3.87% - 6.90%) | 4.19%<br>(2.97% - 6.03%) | 3.68%<br>(2.34% - 5.15%) | 2.99%<br>(1.79% - 4.50%) |
| <i>Aklan</i>             | 46.11%<br>(43.01% - 50.08%) | 41.84%<br>(39.45% - 45.25%) | 36.38%<br>(34.71% - 38.73%) | 31.99%<br>(30.07% - 34.01%) | 19.19%<br>(16.82% - 21.94%) | 16.86%<br>(14.75% - 19.34%) | 14.70%<br>(12.96% - 16.51%) | 12.46%<br>(10.20% - 14.65%) | 5.22%<br>(3.75% - 7.28%) | 4.19%<br>(2.91% - 6.08%) | 3.74%<br>(2.45% - 5.30%) | 3.12%<br>(1.84% - 4.71%) |
| <i>Antique</i>           | 45.87%<br>(43.16% - 49.51%) | 40.91%<br>(38.82% - 43.76%) | 36.63%<br>(34.90% - 39.03%) | 30.40%<br>(28.48% - 32.25%) | 19.01%<br>(16.71% - 21.56%) | 16.57%<br>(14.45% - 18.87%) | 14.57%<br>(12.90% - 16.44%) | 11.76%<br>(9.78% - 13.77%)  | 5.16%<br>(3.81% - 6.92%) | 4.16%<br>(2.78% - 5.85%) | 3.60%<br>(2.36% - 5.21%) | 2.94%<br>(1.78% - 4.27%) |
| <i>Negros Occidental</i> | 44.34%<br>(41.81% - 47.79%) | 40.18%<br>(38.10% - 42.98%) | 36.17%<br>(34.50% - 38.51%) | 32.24%<br>(30.50% - 34.31%) | 18.16%<br>(15.88% - 20.79%) | 16.14%<br>(14.10% - 18.36%) | 14.50%<br>(12.82% - 16.30%) | 12.54%<br>(10.33% - 14.70%) | 4.90%<br>(3.53% - 6.71%) | 4.05%<br>(2.74% - 5.67%) | 3.65%<br>(2.37% - 5.09%) | 3.12%<br>(1.82% - 4.61%) |
| <i>Iloilo</i>            | 43.32%<br>(40.70% - 46.78%) | 40.31%<br>(38.17% - 43.16%) | 36.38%<br>(34.80% - 38.59%) | 31.26%<br>(29.45% - 33.26%) | 18.24%<br>(16.24% - 20.62%) | 16.64%<br>(14.56% - 19.15%) | 14.76%<br>(12.87% - 16.69%) | 12.24%<br>(10.26% - 14.20%) | 5.14%<br>(3.84% - 6.92%) | 4.34%<br>(3.00% - 6.33%) | 3.78%<br>(2.41% - 5.39%) | 3.11%<br>(1.83% - 4.51%) |
| <i>Guimaras</i>          | 51.34%<br>(47.50% - 55.38%) | 45.02%<br>(42.22% - 48.90%) | 36.66%<br>(35.00% - 39.12%) | 31.53%<br>(29.69% - 33.48%) | 21.57%<br>(19.05% - 24.71%) | 17.97%<br>(15.88% - 20.52%) | 14.67%<br>(12.84% - 16.51%) | 12.24%<br>(10.19% - 14.38%) | 5.69%<br>(4.24% - 7.70%) | 4.32%<br>(3.07% - 6.27%) | 3.67%<br>(2.28% - 5.19%) | 3.05%<br>(1.80% - 4.56%) |
| <i>Negros Oriental</i>   | 44.63%<br>(41.94% - 48.19%) | 39.96%<br>(37.72% - 43.23%) | 36.23%<br>(34.37% - 38.62%) | 30.21%<br>(28.33% - 32.21%) | 18.57%<br>(16.27% - 21.09%) | 16.12%<br>(14.04% - 18.31%) | 14.34%<br>(12.62% - 16.01%) | 11.34%<br>(9.25% - 13.36%)  | 5.04%<br>(3.66% - 6.78%) | 4.03%<br>(2.79% - 5.74%) | 3.50%<br>(2.23% - 4.88%) | 2.69%<br>(1.55% - 3.98%) |
| <i>Cebu</i>              | 45.87%<br>(43.07% - 49.33%) | 41.84%<br>(39.41% - 45.33%) | 35.98%<br>(34.29% - 38.21%) | 30.50%<br>(28.70% - 32.54%) | 19.38%<br>(16.96% - 21.94%) | 17.00%<br>(14.92% - 19.38%) | 14.30%<br>(12.63% - 15.98%) | 11.47%<br>(9.28% - 13.58%)  | 5.29%<br>(3.83% - 7.09%) | 4.22%<br>(2.92% - 5.96%) | 3.51%<br>(2.30% - 4.87%) | 2.72%<br>(1.57% - 4.09%) |
| <i>Bahol</i>             | 47.41%<br>(44.32% - 50.86%) | 41.78%<br>(39.47% - 45.21%) | 36.19%<br>(34.45% - 38.57%) | 30.89%<br>(29.11% - 32.97%) | 20.42%<br>(17.87% - 23.04%) | 17.40%<br>(15.26% - 19.68%) | 14.42%<br>(12.72% - 16.15%) | 11.77%<br>(9.55% - 13.88%)  | 5.69%<br>(4.25% - 7.67%) | 4.52%<br>(3.15% - 6.24%) | 3.57%<br>(2.33% - 5.01%) | 2.85%<br>(1.62% - 4.26%) |
| <i>Siquijor</i>          | 49.77%<br>(46.42% - 53.55%) | 42.46%<br>(40.00% - 45.75%) | 36.25%<br>(34.49% - 38.61%) | 31.53%<br>(29.66% - 33.40%) | 21.13%<br>(18.48% - 24.19%) | 16.97%<br>(14.81% - 19.18%) | 14.23%<br>(12.39% - 15.97%) | 11.84%<br>(9.49% - 13.88%)  | 5.66%<br>(4.18% - 7.50%) | 4.10%<br>(2.82% - 5.71%) | 3.42%<br>(2.17% - 4.77%) | 2.80%<br>(1.57% - 4.15%) |
| <i>Southern Leyte</i>    | 47.66%<br>(44.65% - 51.55%) | 42.12%<br>(39.76% - 45.01%) | 37.57%<br>(35.76% - 39.88%) | 32.86%<br>(30.99% - 34.90%) | 20.12%<br>(17.68% - 22.87%) | 17.31%<br>(15.07% - 19.70%) | 15.42%<br>(13.58% - 17.29%) | 13.02%<br>(10.65% - 15.19%) | 5.46%<br>(4.00% - 7.39%) | 4.41%<br>(2.97% - 6.21%) | 3.98%<br>(2.56% - 5.60%) | 3.32%<br>(1.95% - 4.91%) |
| <i>Eastern Samar</i>     | 49.48%<br>(46.07% - 53.21%) | 43.98%<br>(41.44% - 47.46%) | 37.74%<br>(35.99% - 40.18%) | 31.24%<br>(29.53% - 33.15%) | 20.98%<br>(18.30% - 23.83%) | 18.09%<br>(15.94% - 20.29%) | 15.29%<br>(13.52% - 17.12%) | 12.23%<br>(9.86% - 14.36%)  | 5.64%<br>(4.11% - 7.74%) | 4.55%<br>(3.20% - 6.28%) | 3.86%<br>(2.50% - 5.41%) | 3.10%<br>(1.78% - 4.47%) |

Table S8a. Estimated overall, severe, and extreme **stunting** prevalence (%) in children under 5 years, both sexes, in 1990, 2000, 2010, and 2020.

| Location                         | Total                       |                             |                             |                             | Severe                      |                             |                             |                             | Extreme                  |                          |                          |                          |
|----------------------------------|-----------------------------|-----------------------------|-----------------------------|-----------------------------|-----------------------------|-----------------------------|-----------------------------|-----------------------------|--------------------------|--------------------------|--------------------------|--------------------------|
|                                  | 1990                        | 2000                        | 2010                        | 2020                        | 1990                        | 2000                        | 2010                        | 2020                        | 1990                     | 2000                     | 2010                     | 2020                     |
| <i>Northern Samar</i>            | 46.73%<br>(43.63% - 50.42%) | 42.63%<br>(40.28% - 45.90%) | 38.06%<br>(36.17% - 40.75%) | 30.61%<br>(28.84% - 32.46%) | 19.52%<br>(17.06% - 21.97%) | 17.52%<br>(15.40% - 19.72%) | 15.46%<br>(13.59% - 17.32%) | 11.96%<br>(9.85% - 13.96%)  | 5.32%<br>(3.88% - 7.09%) | 4.46%<br>(3.15% - 6.18%) | 3.91%<br>(2.52% - 5.55%) | 3.03%<br>(1.82% - 4.41%) |
| <i>Samar (Western Samar)</i>     | 47.39%<br>(44.20% - 51.23%) | 42.68%<br>(40.30% - 46.10%) | 37.59%<br>(35.83% - 40.04%) | 31.10%<br>(29.34% - 32.94%) | 19.73%<br>(17.30% - 22.45%) | 17.52%<br>(15.45% - 19.73%) | 15.33%<br>(13.51% - 17.15%) | 12.20%<br>(10.01% - 14.27%) | 5.31%<br>(3.85% - 7.29%) | 4.46%<br>(3.15% - 6.24%) | 3.93%<br>(2.57% - 5.54%) | 3.11%<br>(1.85% - 4.57%) |
| <i>Leyte</i>                     | 49.91%<br>(46.34% - 53.61%) | 44.70%<br>(41.93% - 48.41%) | 38.31%<br>(36.45% - 40.87%) | 30.74%<br>(29.05% - 32.48%) | 21.34%<br>(18.66% - 24.25%) | 18.67%<br>(16.57% - 21.17%) | 15.74%<br>(13.90% - 17.58%) | 12.27%<br>(10.22% - 14.28%) | 5.78%<br>(4.23% - 7.75%) | 4.80%<br>(3.38% - 6.84%) | 4.06%<br>(2.67% - 5.74%) | 3.21%<br>(1.95% - 4.62%) |
| <i>Biliran</i>                   | 50.15%<br>(46.55% - 53.94%) | 43.63%<br>(41.10% - 47.23%) | 37.66%<br>(35.93% - 40.26%) | 33.75%<br>(32.01% - 35.92%) | 21.42%<br>(18.80% - 24.42%) | 17.86%<br>(15.57% - 20.28%) | 15.38%<br>(13.58% - 17.16%) | 13.30%<br>(11.05% - 15.64%) | 5.82%<br>(4.25% - 7.89%) | 4.47%<br>(3.04% - 6.26%) | 3.94%<br>(2.51% - 5.51%) | 3.36%<br>(2.01% - 5.08%) |
| <i>Zamboanga Sibugay</i>         | 46.96%<br>(44.25% - 50.24%) | 44.22%<br>(41.77% - 47.21%) | 39.11%<br>(37.29% - 41.68%) | 31.73%<br>(30.05% - 33.55%) | 21.34%<br>(18.94% - 24.32%) | 19.60%<br>(17.44% - 22.29%) | 16.99%<br>(15.23% - 18.82%) | 13.04%<br>(10.85% - 15.21%) | 6.52%<br>(4.82% - 8.98%) | 5.54%<br>(3.98% - 7.79%) | 4.77%<br>(3.29% - 6.65%) | 3.56%<br>(2.18% - 5.33%) |
| <i>Zamboanga Del Norte</i>       | 47.16%<br>(44.43% - 50.80%) | 43.06%<br>(40.77% - 45.95%) | 38.67%<br>(36.90% - 41.14%) | 33.17%<br>(31.37% - 35.21%) | 21.43%<br>(18.77% - 24.33%) | 19.21%<br>(16.97% - 21.53%) | 16.96%<br>(15.07% - 18.73%) | 13.73%<br>(11.39% - 15.95%) | 6.54%<br>(4.78% - 8.95%) | 5.54%<br>(3.93% - 7.59%) | 4.86%<br>(3.25% - 6.59%) | 3.75%<br>(2.21% - 5.43%) |
| <i>Zamboanga Del Sur</i>         | 47.28%<br>(44.50% - 50.70%) | 42.87%<br>(40.50% - 45.87%) | 39.01%<br>(37.26% - 41.45%) | 32.67%<br>(30.96% - 34.58%) | 21.42%<br>(18.95% - 24.19%) | 19.14%<br>(17.03% - 21.51%) | 17.17%<br>(15.37% - 19.15%) | 13.60%<br>(11.34% - 15.71%) | 6.49%<br>(4.81% - 8.82%) | 5.54%<br>(3.92% - 7.69%) | 4.92%<br>(3.38% - 6.77%) | 3.76%<br>(2.26% - 5.34%) |
| <i>Misamis Occidental</i>        | 42.06%<br>(39.79% - 45.33%) | 37.59%<br>(35.63% - 40.02%) | 34.49%<br>(33.00% - 36.37%) | 28.78%<br>(27.04% - 30.66%) | 17.77%<br>(15.45% - 20.07%) | 15.37%<br>(13.28% - 17.69%) | 13.78%<br>(12.13% - 15.47%) | 10.93%<br>(8.91% - 12.87%)  | 5.03%<br>(3.66% - 6.69%) | 3.98%<br>(2.78% - 5.70%) | 3.46%<br>(2.31% - 4.79%) | 2.67%<br>(1.54% - 3.91%) |
| <i>Bukidnon</i>                  | 44.01%<br>(41.57% - 47.39%) | 39.36%<br>(37.29% - 42.25%) | 34.80%<br>(33.31% - 36.79%) | 27.40%<br>(25.66% - 29.17%) | 18.47%<br>(16.25% - 20.92%) | 16.06%<br>(13.97% - 18.22%) | 13.92%<br>(12.18% - 15.56%) | 10.34%<br>(8.38% - 12.12%)  | 5.15%<br>(3.83% - 6.88%) | 4.11%<br>(2.80% - 5.68%) | 3.49%<br>(2.26% - 4.83%) | 2.51%<br>(1.46% - 3.65%) |
| <i>Lanao Del Norte</i>           | 41.29%<br>(39.02% - 44.15%) | 37.54%<br>(35.67% - 39.98%) | 34.25%<br>(32.67% - 36.15%) | 29.15%<br>(27.57% - 31.13%) | 17.39%<br>(15.23% - 19.66%) | 15.46%<br>(13.36% - 17.58%) | 13.69%<br>(12.02% - 15.26%) | 11.12%<br>(8.97% - 13.20%)  | 4.95%<br>(3.64% - 6.54%) | 4.07%<br>(2.79% - 5.57%) | 3.44%<br>(2.26% - 4.71%) | 2.73%<br>(1.56% - 4.03%) |
| <i>Misamis Oriental</i>          | 43.44%<br>(40.87% - 46.73%) | 39.42%<br>(37.37% - 41.99%) | 34.15%<br>(32.64% - 35.92%) | 29.75%<br>(27.97% - 31.59%) | 18.60%<br>(16.34% - 21.22%) | 16.34%<br>(14.25% - 18.33%) | 13.81%<br>(12.21% - 15.46%) | 11.50%<br>(9.38% - 13.65%)  | 5.32%<br>(3.99% - 7.17%) | 4.28%<br>(2.90% - 5.83%) | 3.54%<br>(2.38% - 4.83%) | 2.87%<br>(1.72% - 4.23%) |
| <i>Camiguin</i>                  | 46.60%<br>(43.53% - 50.15%) | 40.73%<br>(38.56% - 43.58%) | 34.76%<br>(33.22% - 36.62%) | 29.38%<br>(27.70% - 31.22%) | 20.10%<br>(17.56% - 22.75%) | 16.66%<br>(14.51% - 19.05%) | 13.89%<br>(12.32% - 15.59%) | 11.34%<br>(9.31% - 13.25%)  | 5.75%<br>(4.29% - 7.71%) | 4.26%<br>(2.93% - 6.10%) | 3.49%<br>(2.30% - 4.80%) | 2.83%<br>(1.70% - 4.13%) |
| <i>Davao Oriental</i>            | 42.77%<br>(40.12% - 46.22%) | 37.57%<br>(35.62% - 40.38%) | 33.35%<br>(31.74% - 35.27%) | 27.35%<br>(25.61% - 29.12%) | 17.20%<br>(14.90% - 19.62%) | 14.54%<br>(12.40% - 16.65%) | 12.52%<br>(10.86% - 14.17%) | 9.86%<br>(8.00% - 11.66%)   | 4.53%<br>(3.29% - 6.19%) | 3.45%<br>(2.30% - 4.93%) | 2.86%<br>(1.74% - 4.05%) | 2.23%<br>(1.25% - 3.32%) |
| <i>Davao de Oro</i>              | 43.48%<br>(40.77% - 46.80%) | 38.48%<br>(36.46% - 41.23%) | 33.02%<br>(31.54% - 34.73%) | 27.03%<br>(25.35% - 28.82%) | 17.37%<br>(15.12% - 19.66%) | 14.86%<br>(12.98% - 16.87%) | 12.53%<br>(10.89% - 14.19%) | 9.81%<br>(7.79% - 11.69%)   | 4.51%<br>(3.29% - 6.05%) | 3.50%<br>(2.39% - 4.84%) | 2.92%<br>(1.89% - 4.07%) | 2.23%<br>(1.22% - 3.42%) |
| <i>Davao Del Sur</i>             | 43.29%<br>(40.68% - 46.60%) | 38.08%<br>(36.17% - 40.55%) | 32.94%<br>(31.40% - 34.65%) | 27.16%<br>(25.38% - 28.91%) | 17.41%<br>(15.31% - 19.72%) | 14.85%<br>(12.83% - 16.93%) | 12.54%<br>(10.91% - 14.20%) | 9.94%<br>(7.94% - 11.83%)   | 4.58%<br>(3.37% - 6.10%) | 3.56%<br>(2.38% - 4.97%) | 2.93%<br>(1.90% - 4.20%) | 2.30%<br>(1.28% - 3.43%) |
| <i>Davao Occidental</i>          | 40.81%<br>(38.47% - 43.85%) | 37.28%<br>(35.25% - 39.90%) | 32.88%<br>(31.32% - 34.94%) | 27.06%<br>(25.27% - 28.83%) | 16.22%<br>(14.05% - 18.35%) | 14.25%<br>(12.35% - 16.32%) | 12.29%<br>(10.57% - 13.87%) | 9.64%<br>(7.82% - 11.50%)   | 4.26%<br>(3.13% - 5.67%) | 3.33%<br>(2.26% - 4.80%) | 2.79%<br>(1.69% - 3.96%) | 2.14%<br>(1.20% - 3.23%) |
| <i>Davao Del Norte</i>           | 44.70%<br>(41.86% - 48.34%) | 39.08%<br>(36.94% - 41.86%) | 33.25%<br>(31.70% - 35.09%) | 28.38%<br>(26.46% - 30.25%) | 18.12%<br>(15.73% - 20.86%) | 15.33%<br>(13.17% - 17.64%) | 12.66%<br>(10.94% - 14.34%) | 10.49%<br>(8.48% - 12.61%)  | 4.72%<br>(3.47% - 6.38%) | 3.68%<br>(2.50% - 5.29%) | 2.96%<br>(1.86% - 4.13%) | 2.44%<br>(1.37% - 3.74%) |
| <i>South Cotabato</i>            | 46.72%<br>(43.84% - 50.19%) | 42.06%<br>(39.89% - 44.99%) | 38.72%<br>(36.93% - 41.31%) | 32.37%<br>(30.62% - 34.48%) | 20.73%<br>(18.31% - 23.40%) | 18.19%<br>(15.89% - 20.48%) | 16.50%<br>(14.65% - 18.42%) | 13.22%<br>(11.06% - 15.34%) | 6.13%<br>(4.57% - 8.22%) | 5.04%<br>(3.55% - 6.98%) | 4.50%<br>(3.02% - 6.27%) | 3.56%<br>(2.17% - 5.18%) |
| <i>Sultan Kudarat</i>            | 46.89%<br>(43.96% - 50.38%) | 42.77%<br>(40.51% - 46.00%) | 38.31%<br>(36.52% - 40.82%) | 33.16%<br>(31.38% - 35.35%) | 20.46%<br>(18.05% - 23.08%) | 18.31%<br>(16.16% - 20.68%) | 16.18%<br>(14.40% - 18.05%) | 13.37%<br>(11.17% - 15.61%) | 5.92%<br>(4.42% - 8.02%) | 4.98%<br>(3.56% - 6.91%) | 4.37%<br>(2.96% - 6.05%) | 3.51%<br>(2.08% - 5.19%) |
| <i>Cotabato (North Cotabato)</i> | 44.66%<br>(41.96% - 48.16%) | 41.24%<br>(39.10% - 44.27%) | 38.47%<br>(36.63% - 41.32%) | 32.81%<br>(30.88% - 34.96%) | 19.29%<br>(17.09% - 21.90%) | 17.61%<br>(15.47% - 19.76%) | 16.28%<br>(14.38% - 18.14%) | 13.27%<br>(11.08% - 15.42%) | 5.58%<br>(4.16% - 7.61%) | 4.80%<br>(3.39% - 6.64%) | 4.40%<br>(2.85% - 6.15%) | 3.51%<br>(2.11% - 5.11%) |
| <i>Sarangani</i>                 | 46.28%<br>(43.46% - 49.64%) | 42.35%<br>(40.00% - 45.41%) | 39.31%<br>(37.38% - 42.25%) | 33.53%<br>(31.59% - 35.93%) | 20.15%<br>(17.62% - 23.00%) | 18.09%<br>(15.81% - 20.54%) | 16.68%<br>(14.68% - 18.74%) | 13.54%<br>(11.28% - 15.88%) | 5.78%<br>(4.07% - 7.93%) | 4.89%<br>(3.32% - 6.99%) | 4.50%<br>(2.86% - 6.43%) | 3.56%<br>(2.05% - 5.36%) |
| <i>Agusan Del Norte</i>          | 42.02%<br>(39.52% - 45.38%) | 37.82%<br>(35.82% - 40.40%) | 34.53%<br>(32.90% - 36.72%) | 27.71%<br>(25.96% - 29.47%) | 16.53%<br>(14.45% - 18.80%) | 14.49%<br>(12.51% - 16.81%) | 12.85%<br>(11.21% - 14.65%) | 10.16%<br>(8.20% - 12.06%)  | 4.27%<br>(3.10% - 5.73%) | 3.40%<br>(2.28% - 5.02%) | 2.87%<br>(1.78% - 4.19%) | 2.35%<br>(1.32% - 3.60%) |

Table S8a. Estimated overall, severe, and extreme **stunting** prevalence (%) in children under 5 years, both sexes, in 1990, 2000, 2010, and 2020.

| Location                          | Total                       |                             |                             |                             | Severe                      |                             |                             |                             | Extreme                     |                             |                            |                           |
|-----------------------------------|-----------------------------|-----------------------------|-----------------------------|-----------------------------|-----------------------------|-----------------------------|-----------------------------|-----------------------------|-----------------------------|-----------------------------|----------------------------|---------------------------|
|                                   | 1990                        | 2000                        | 2010                        | 2020                        | 1990                        | 2000                        | 2010                        | 2020                        | 1990                        | 2000                        | 2010                       | 2020                      |
| Agusan Del Sur                    | 41.91%<br>(39.40% - 45.26%) | 37.63%<br>(35.61% - 40.33%) | 34.06%<br>(32.46% - 36.33%) | 29.11%<br>(27.47% - 31.01%) | 16.39%<br>(14.20% - 18.60%) | 14.34%<br>(12.28% - 16.64%) | 12.64%<br>(10.97% - 14.42%) | 10.51%<br>(8.26% - 12.49%)  | 4.22%<br>(3.08% - 5.68%)    | 3.35%<br>(2.23% - 4.81%)    | 2.82%<br>(1.73% - 4.13%)   | 2.36%<br>(1.29% - 3.54%)  |
| Surigao Del Sur                   | 45.32%<br>(42.37% - 49.26%) | 40.31%<br>(37.95% - 43.58%) | 34.47%<br>(32.76% - 36.58%) | 27.83%<br>(26.08% - 29.74%) | 17.80%<br>(15.46% - 20.25%) | 15.39%<br>(13.28% - 17.59%) | 12.90%<br>(11.18% - 14.71%) | 10.12%<br>(8.13% - 12.05%)  | 4.45%<br>(3.24% - 6.18%)    | 3.53%<br>(2.37% - 4.97%)    | 2.92%<br>(1.82% - 4.24%)   | 2.32%<br>(1.31% - 3.51%)  |
| Surigao Del Norte                 | 45.05%<br>(42.00% - 48.80%) | 39.92%<br>(37.78% - 43.26%) | 34.28%<br>(32.63% - 36.62%) | 28.51%<br>(26.76% - 30.35%) | 17.56%<br>(15.45% - 20.06%) | 15.09%<br>(13.15% - 17.19%) | 12.76%<br>(11.02% - 14.38%) | 10.35%<br>(8.27% - 12.46%)  | 4.36%<br>(3.21% - 5.94%)    | 3.40%<br>(2.30% - 4.84%)    | 2.85%<br>(1.75% - 4.06%)   | 2.35%<br>(1.28% - 3.60%)  |
| Dinagat Islands                   | 47.36%<br>(44.13% - 51.40%) | 41.32%<br>(38.92% - 44.57%) | 34.85%<br>(33.14% - 37.12%) | 28.21%<br>(26.44% - 29.99%) | 18.69%<br>(16.25% - 21.45%) | 15.66%<br>(13.50% - 17.90%) | 12.94%<br>(11.24% - 14.76%) | 10.19%<br>(8.39% - 12.12%)  | 4.66%<br>(3.47% - 6.36%)    | 3.53%<br>(2.42% - 5.08%)    | 2.88%<br>(1.82% - 4.24%)   | 2.29%<br>(1.33% - 3.47%)  |
| Tawi-Tawi                         | 44.43%<br>(42.44% - 46.62%) | 42.54%<br>(40.88% - 44.45%) | 40.34%<br>(38.79% - 42.11%) | 34.94%<br>(33.16% - 36.84%) | 23.48%<br>(20.66% - 26.66%) | 22.09%<br>(19.58% - 24.56%) | 20.80%<br>(18.90% - 22.74%) | 16.83%<br>(14.48% - 19.20%) | 9.18%<br>(6.65% - 12.39%)   | 8.22%<br>(5.97% - 10.88%)   | 7.76%<br>(5.79% - 9.91%)   | 5.83%<br>(3.92% - 7.96%)  |
| Basilan                           | 48.70%<br>(46.24% - 51.57%) | 44.57%<br>(42.61% - 47.19%) | 40.17%<br>(38.71% - 41.99%) | 35.25%<br>(33.69% - 36.95%) | 25.65%<br>(22.71% - 28.79%) | 23.16%<br>(20.65% - 25.93%) | 20.87%<br>(18.87% - 22.84%) | 17.07%<br>(14.75% - 19.50%) | 9.78%<br>(7.13% - 13.09%)   | 8.57%<br>(6.21% - 11.54%)   | 7.90%<br>(5.73% - 10.14%)  | 5.96%<br>(4.04% - 8.19%)  |
| Sulu                              | 44.49%<br>(42.71% - 46.78%) | 42.02%<br>(40.28% - 44.17%) | 40.17%<br>(38.66% - 41.88%) | 35.33%<br>(33.47% - 37.24%) | 23.74%<br>(21.12% - 26.52%) | 21.88%<br>(19.44% - 24.52%) | 20.78%<br>(19.00% - 22.73%) | 17.06%<br>(14.49% - 19.56%) | 9.43%<br>(7.11% - 12.20%)   | 8.21%<br>(5.99% - 10.81%)   | 7.79%<br>(5.88% - 9.96%)   | 5.91%<br>(3.90% - 8.22%)  |
| Maguindanao                       | 46.56%<br>(44.50% - 48.87%) | 43.26%<br>(41.46% - 45.51%) | 40.15%<br>(38.68% - 41.98%) | 35.01%<br>(33.25% - 36.87%) | 24.81%<br>(22.00% - 27.69%) | 22.64%<br>(20.28% - 25.22%) | 20.76%<br>(18.93% - 22.80%) | 16.83%<br>(14.52% - 19.34%) | 9.77%<br>(7.14% - 12.85%)   | 8.53%<br>(6.17% - 11.30%)   | 7.79%<br>(5.90% - 10.07%)  | 5.80%<br>(3.96% - 8.00%)  |
| Lanao Del Sur                     | 46.50%<br>(44.40% - 49.07%) | 43.22%<br>(41.45% - 45.41%) | 39.85%<br>(38.32% - 41.63%) | 36.49%<br>(34.65% - 38.50%) | 24.62%<br>(21.73% - 27.48%) | 22.48%<br>(20.15% - 25.13%) | 20.55%<br>(18.75% - 22.38%) | 17.87%<br>(15.58% - 20.35%) | 9.60%<br>(7.11% - 12.55%)   | 8.38%<br>(6.19% - 11.05%)   | 7.68%<br>(5.76% - 9.75%)   | 6.30%<br>(4.29% - 8.68%)  |
| National Capital Region           | 30.27%<br>(28.79% - 31.76%) | 27.68%<br>(26.24% - 29.12%) | 25.43%<br>(24.25% - 26.70%) | 21.29%<br>(19.67% - 22.83%) | 10.55%<br>(8.87% - 12.13%)  | 9.04%<br>(7.57% - 10.54%)   | 7.99%<br>(6.83% - 9.08%)    | 6.51%<br>(5.04% - 8.02%)    | 2.38%<br>(1.71% - 3.12%)    | 1.70%<br>(1.10% - 2.44%)    | 1.38%<br>(0.85% - 1.99%)   | 1.12%<br>(0.55% - 1.84%)  |
| Sri Lanka                         | 30.89%<br>(30.00% - 31.77%) | 25.05%<br>(24.28% - 25.78%) | 18.50%<br>(17.62% - 19.34%) | 15.83%<br>(14.90% - 16.80%) | 11.04%<br>(10.05% - 12.00%) | 8.47%<br>(7.75% - 9.18%)    | 5.23%<br>(4.57% - 5.90%)    | 4.33%<br>(3.70% - 4.98%)    | 2.37%<br>(1.87% - 2.88%)    | 1.71%<br>(1.41% - 2.02%)    | 0.79%<br>(0.57% - 1.04%)   | 0.61%<br>(0.42% - 0.83%)  |
| Thailand                          | 24.77%<br>(23.81% - 25.75%) | 17.91%<br>(16.86% - 18.98%) | 14.38%<br>(13.43% - 15.31%) | 12.40%<br>(11.43% - 13.29%) | 7.65%<br>(6.75% - 8.65%)    | 4.86%<br>(4.16% - 5.61%)    | 3.55%<br>(3.04% - 4.08%)    | 2.79%<br>(2.33% - 3.29%)    | 1.28%<br>(0.94% - 1.70%)    | 0.66%<br>(0.45% - 0.91%)    | 0.37%<br>(0.23% - 0.52%)   | 0.20%<br>(0.10% - 0.33%)  |
| Mauritius                         | 20.98%<br>(20.12% - 21.84%) | 16.07%<br>(15.07% - 17.14%) | 16.82%<br>(15.67% - 17.97%) | 15.85%<br>(14.61% - 17.07%) | 6.84%<br>(6.07% - 7.60%)    | 4.71%<br>(3.96% - 5.40%)    | 5.72%<br>(4.95% - 6.53%)    | 5.30%<br>(4.51% - 6.09%)    | 1.27%<br>(0.97% - 1.58%)    | 0.73%<br>(0.50% - 0.97%)    | 1.28%<br>(0.98% - 1.61%)   | 1.13%<br>(0.85% - 1.46%)  |
| Seychelles                        | 12.22%<br>(10.86% - 13.65%) | 11.61%<br>(10.35% - 12.85%) | 10.69%<br>(9.65% - 11.85%)  | 9.57%<br>(8.60% - 10.58%)   | 2.91%<br>(2.17% - 3.76%)    | 2.76%<br>(2.11% - 3.49%)    | 2.27%<br>(1.72% - 2.90%)    | 1.88%<br>(1.43% - 2.35%)    | 0.25%<br>(0.08% - 0.51%)    | 0.23%<br>(0.07% - 0.44%)    | 0.12%<br>(0.02% - 0.27%)   | 0.06%<br>(0.01% - 0.16%)  |
| Timor-Leste                       | 56.13%<br>(53.49% - 58.83%) | 54.32%<br>(52.16% - 56.78%) | 48.54%<br>(46.91% - 50.36%) | 44.69%<br>(43.19% - 46.58%) | 33.94%<br>(31.11% - 36.94%) | 33.44%<br>(31.11% - 35.76%) | 27.07%<br>(25.31% - 28.97%) | 23.93%<br>(21.89% - 26.19%) | 14.59%<br>(10.79% - 19.22%) | 15.15%<br>(12.17% - 19.03%) | 10.78%<br>(8.76% - 13.19%) | 9.12%<br>(7.17% - 11.78%) |
| Viet Nam                          | 50.35%<br>(47.73% - 53.31%) | 39.88%<br>(38.35% - 41.78%) | 29.81%<br>(28.89% - 30.81%) | 24.29%<br>(22.90% - 25.54%) | 23.54%<br>(21.61% - 25.50%) | 16.54%<br>(15.33% - 17.87%) | 10.63%<br>(9.59% - 11.72%)  | 8.27%<br>(7.00% - 9.45%)    | 6.93%<br>(5.39% - 8.86%)    | 4.22%<br>(3.37% - 5.31%)    | 2.26%<br>(1.72% - 2.91%)   | 1.68%<br>(1.11% - 2.24%)  |
| <b>Sub-Saharan Africa</b>         | 42.06%<br>(41.67% - 42.49%) | 41.56%<br>(41.22% - 41.91%) | 37.23%<br>(36.92% - 37.55%) | 32.32%<br>(32.00% - 32.63%) | 21.64%<br>(21.21% - 22.09%) | 21.85%<br>(21.45% - 22.27%) | 17.67%<br>(17.36% - 17.98%) | 14.18%<br>(13.83% - 14.57%) | 8.18%<br>(7.66% - 8.77%)    | 6.67%<br>(8.17% - 9.22%)    | 6.05%<br>(5.71% - 6.38%)   | 4.42%<br>(4.08% - 4.81%)  |
| <b>Central Sub-Saharan Africa</b> | 41.09%<br>(40.15% - 42.05%) | 41.75%<br>(40.98% - 42.63%) | 39.56%<br>(38.70% - 40.57%) | 35.40%<br>(34.46% - 36.43%) | 24.04%<br>(22.78% - 25.27%) | 24.72%<br>(23.62% - 25.86%) | 20.97%<br>(19.82% - 22.06%) | 17.62%<br>(16.30% - 19.02%) | 11.11%<br>(9.56% - 12.56%)  | 11.73%<br>(10.27% - 13.20%) | 8.42%<br>(7.08% - 9.83%)   | 6.50%<br>(5.15% - 7.98%)  |
| Angola                            | 50.73%<br>(48.79% - 53.05%) | 47.62%<br>(45.86% - 49.73%) | 40.59%<br>(38.76% - 42.75%) | 34.57%<br>(33.13% - 36.15%) | 28.22%<br>(25.93% - 30.48%) | 25.66%<br>(23.89% - 27.59%) | 17.59%<br>(15.96% - 19.29%) | 14.17%<br>(12.56% - 15.85%) | 10.99%<br>(8.24% - 14.12%)  | 9.61%<br>(7.43% - 11.88%)   | 4.74%<br>(3.43% - 6.25%)   | 3.70%<br>(2.58% - 4.99%)  |
| Central African Republic          | 41.18%<br>(39.98% - 42.40%) | 42.13%<br>(41.05% - 43.29%) | 39.43%<br>(38.29% - 40.77%) | 38.29%<br>(36.83% - 39.91%) | 23.48%<br>(21.49% - 25.52%) | 24.60%<br>(22.93% - 26.25%) | 20.66%<br>(18.99% - 22.26%) | 19.33%<br>(17.30% - 21.43%) | 10.42%<br>(7.88% - 13.07%)  | 11.19%<br>(8.91% - 13.43%)  | 7.90%<br>(5.97% - 9.97%)   | 7.03%<br>(4.87% - 9.40%)  |
| Congo                             | 25.03%<br>(23.90% - 26.23%) | 28.51%<br>(27.46% - 29.57%) | 25.42%<br>(24.62% - 26.25%) | 21.34%<br>(20.14% - 22.51%) | 10.24%<br>(9.08% - 11.44%)  | 12.43%<br>(11.28% - 13.60%) | 9.62%<br>(8.78% - 10.43%)   | 7.23%<br>(6.15% - 8.13%)    | 2.79%<br>(2.17% - 3.49%)    | 3.75%<br>(2.96% - 4.59%)    | 2.32%<br>(1.82% - 2.82%)   | 1.44%<br>(0.99% - 1.90%)  |
| Democratic Republic of the Congo  | 39.53%<br>(38.31% - 40.62%) | 40.94%<br>(39.95% - 41.96%) | 40.50%<br>(39.45% - 41.80%) | 36.66%<br>(35.33% - 38.07%) | 24.01%<br>(22.25% - 25.73%) | 25.47%<br>(23.86% - 27.06%) | 23.23%<br>(21.72% - 24.81%) | 19.64%<br>(17.66% - 21.57%) | 11.89%<br>(9.91% - 13.75%)  | 13.12%<br>(11.03% - 15.18%) | 10.32%<br>(8.37% - 12.39%) | 7.93%<br>(5.97% - 10.12%) |

Table S8a. Estimated overall, severe, and extreme **stunting** prevalence (%) in children under 5 years, both sexes, in 1990, 2000, 2010, and 2020.

| Location                          | Total                       |                             |                             |                             | Severe                      |                             |                             |                             | Extreme                     |                             |                           |                           |
|-----------------------------------|-----------------------------|-----------------------------|-----------------------------|-----------------------------|-----------------------------|-----------------------------|-----------------------------|-----------------------------|-----------------------------|-----------------------------|---------------------------|---------------------------|
|                                   | 1990                        | 2000                        | 2010                        | 2020                        | 1990                        | 2000                        | 2010                        | 2020                        | 1990                        | 2000                        | 2010                      | 2020                      |
| Equatorial Guinea                 | 49.89%<br>(47.14% - 52.69%) | 42.45%<br>(40.81% - 44.42%) | 27.80%<br>(26.96% - 28.64%) | 23.15%<br>(21.86% - 24.42%) | 25.08%<br>(22.71% - 27.84%) | 21.26%<br>(20.01% - 22.63%) | 10.79%<br>(9.83% - 11.79%)  | 8.43%<br>(7.27% - 9.66%)    | 7.85%<br>(5.90% - 10.29%)   | 7.19%<br>(5.94% - 8.59%)    | 2.73%<br>(2.22% - 3.29%)  | 1.95%<br>(1.43% - 2.57%)  |
| Gabon                             | 27.20%<br>(25.85% - 28.60%) | 25.53%<br>(24.37% - 26.73%) | 20.05%<br>(18.91% - 21.19%) | 16.26%<br>(15.04% - 17.39%) | 8.77%<br>(7.34% - 10.25%)   | 8.33%<br>(7.19% - 9.45%)    | 5.79%<br>(4.96% - 6.66%)    | 4.51%<br>(3.73% - 5.34%)    | 1.59%<br>(1.00% - 2.31%)    | 1.56%<br>(1.05% - 2.15%)    | 0.87%<br>(0.56% - 1.22%)  | 0.62%<br>(0.36% - 0.95%)  |
| <b>Eastern Sub-Saharan Africa</b> | 46.08%<br>(45.57% - 46.59%) | 44.55%<br>(44.09% - 45.04%) | 38.94%<br>(38.55% - 39.36%) | 33.70%<br>(33.31% - 34.08%) | 23.93%<br>(23.40% - 24.49%) | 23.13%<br>(22.68% - 23.61%) | 18.33%<br>(17.97% - 18.71%) | 14.63%<br>(14.21% - 15.07%) | 8.77%<br>(8.15% - 9.43%)    | 8.67%<br>(8.14% - 9.27%)    | 6.12%<br>(5.76% - 6.50%)  | 4.41%<br>(4.06% - 4.77%)  |
| Burundi                           | 47.75%<br>(46.49% - 49.13%) | 51.01%<br>(49.56% - 52.69%) | 48.78%<br>(46.86% - 51.27%) | 46.90%<br>(45.02% - 49.48%) | 29.06%<br>(26.96% - 31.22%) | 31.78%<br>(29.66% - 34.08%) | 25.70%<br>(23.80% - 27.68%) | 23.34%<br>(21.13% - 25.59%) | 13.76%<br>(11.06% - 16.68%) | 15.40%<br>(12.27% - 18.95%) | 9.31%<br>(7.24% - 11.82%) | 7.72%<br>(5.36% - 10.47%) |
| Comoros                           | 44.39%<br>(42.83% - 46.21%) | 43.38%<br>(41.95% - 45.13%) | 35.55%<br>(34.20% - 36.98%) | 31.65%<br>(30.22% - 32.99%) | 23.18%<br>(21.10% - 25.26%) | 23.85%<br>(22.08% - 25.76%) | 16.94%<br>(15.23% - 18.54%) | 14.18%<br>(12.48% - 15.84%) | 8.48%<br>(6.52% - 10.74%)   | 9.71%<br>(7.85% - 11.77%)   | 5.68%<br>(4.48% - 6.99%)  | 4.38%<br>(3.31% - 5.59%)  |
| Djibouti                          | 33.17%<br>(31.93% - 34.45%) | 33.60%<br>(32.58% - 34.71%) | 32.88%<br>(31.99% - 33.83%) | 29.64%<br>(28.44% - 30.87%) | 15.35%<br>(13.97% - 16.78%) | 16.62%<br>(15.34% - 17.93%) | 17.25%<br>(16.08% - 18.44%) | 14.63%<br>(13.23% - 16.11%) | 4.95%<br>(3.99% - 5.95%)    | 6.00%<br>(5.02% - 7.08%)    | 6.93%<br>(5.95% - 7.98%)  | 5.37%<br>(4.33% - 6.57%)  |
| Eritrea                           | 50.14%<br>(47.96% - 52.37%) | 46.25%<br>(44.05% - 48.72%) | 42.74%<br>(40.52% - 45.41%) | 38.33%<br>(36.70% - 40.39%) | 28.63%<br>(26.21% - 31.01%) | 23.59%<br>(21.70% - 25.59%) | 19.98%<br>(17.79% - 22.36%) | 17.95%<br>(15.79% - 20.28%) | 11.94%<br>(8.73% - 15.56%)  | 7.96%<br>(5.90% - 10.43%)   | 6.01%<br>(3.80% - 8.83%)  | 5.70%<br>(3.62% - 8.26%)  |
| Ethiopia                          | 50.50%<br>(49.35% - 51.77%) | 48.66%<br>(47.65% - 49.83%) | 41.71%<br>(40.93% - 42.57%) | 35.28%<br>(34.59% - 35.98%) | 27.93%<br>(26.65% - 29.24%) | 27.50%<br>(26.34% - 28.64%) | 21.62%<br>(20.79% - 22.53%) | 16.77%<br>(15.94% - 17.61%) | 10.82%<br>(9.25% - 12.66%)  | 11.30%<br>(9.73% - 12.91%)  | 8.04%<br>(7.09% - 9.12%)  | 5.62%<br>(4.88% - 6.41%)  |
| Kenya                             | 36.73%<br>(36.08% - 37.43%) | 36.41%<br>(35.71% - 37.18%) | 33.43%<br>(32.71% - 34.17%) | 28.67%<br>(28.02% - 29.36%) | 15.80%<br>(15.14% - 16.46%) | 15.00%<br>(14.34% - 15.66%) | 12.44%<br>(11.82% - 13.07%) | 10.09%<br>(9.46% - 10.79%)  | 4.87%<br>(4.35% - 5.44%)    | 4.30%<br>(3.82% - 4.82%)    | 3.05%<br>(2.64% - 3.48%)  | 2.42%<br>(2.08% - 2.79%)  |
| <i>Baringo</i>                    | 38.98%<br>(36.60% - 42.29%) | 37.42%<br>(34.68% - 40.78%) | 34.54%<br>(31.66% - 38.38%) | 28.46%<br>(25.95% - 31.49%) | 15.80%<br>(13.42% - 18.52%) | 14.52%<br>(12.09% - 17.13%) | 11.16%<br>(8.62% - 13.92%)  | 8.41%<br>(5.90% - 10.78%)   | 4.13%<br>(2.48% - 6.38%)    | 3.45%<br>(2.02% - 5.30%)    | 2.01%<br>(1.06% - 3.34%)  | 1.39%<br>(0.63% - 2.52%)  |
| <i>Bomet</i>                      | 44.76%<br>(42.13% - 48.13%) | 41.35%<br>(38.81% - 44.73%) | 34.89%<br>(32.57% - 37.49%) | 30.17%<br>(28.10% - 32.51%) | 21.35%<br>(17.62% - 25.25%) | 17.70%<br>(14.46% - 21.27%) | 13.88%<br>(11.20% - 16.71%) | 11.32%<br>(8.85% - 13.73%)  | 7.95%<br>(4.05% - 12.75%)   | 5.51%<br>(2.69% - 9.17%)    | 4.12%<br>(2.00% - 6.72%)  | 3.03%<br>(1.43% - 4.87%)  |
| <i>Bungoma</i>                    | 42.18%<br>(40.15% - 44.52%) | 39.63%<br>(37.78% - 41.75%) | 33.97%<br>(32.00% - 36.26%) | 28.08%<br>(26.33% - 29.97%) | 21.16%<br>(18.43% - 24.23%) | 18.58%<br>(16.52% - 20.78%) | 13.59%<br>(11.54% - 15.76%) | 9.72%<br>(7.50% - 11.77%)   | 7.54%<br>(5.11% - 10.81%)   | 5.93%<br>(4.06% - 8.14%)    | 3.58%<br>(2.01% - 5.40%)  | 2.14%<br>(1.01% - 3.48%)  |
| <i>Busia</i>                      | 40.73%<br>(38.41% - 44.04%) | 38.28%<br>(35.74% - 41.77%) | 34.66%<br>(31.59% - 38.44%) | 27.16%<br>(24.56% - 29.88%) | 17.57%<br>(14.64% - 20.56%) | 14.64%<br>(11.86% - 17.52%) | 11.52%<br>(8.75% - 14.16%)  | 7.54%<br>(5.18% - 9.89%)    | 5.72%<br>(2.87% - 9.33%)    | 3.80%<br>(1.78% - 6.65%)    | 2.18%<br>(1.00% - 3.94%)  | 1.14%<br>(0.37% - 2.31%)  |
| <i>Elgeyo-Marakwet</i>            | 41.74%<br>(38.72% - 45.46%) | 40.95%<br>(37.51% - 45.21%) | 38.28%<br>(33.19% - 44.10%) | 29.29%<br>(26.51% - 32.49%) | 15.09%<br>(12.58% - 17.86%) | 12.62%<br>(10.09% - 15.10%) | 8.84%<br>(6.14% - 11.66%)   | 6.59%<br>(3.86% - 9.21%)    | 3.18%<br>(1.73% - 5.05%)    | 2.12%<br>(1.06% - 3.80%)    | 0.93%<br>(0.38% - 1.81%)  | 0.76%<br>(0.22% - 1.62%)  |
| <i>Embu</i>                       | 22.48%<br>(20.20% - 24.65%) | 21.21%<br>(19.12% - 23.33%) | 22.90%<br>(20.63% - 25.07%) | 20.30%<br>(18.19% - 22.26%) | 5.64%<br>(3.77% - 7.43%)    | 5.42%<br>(3.83% - 7.13%)    | 5.80%<br>(3.80% - 7.68%)    | 5.03%<br>(3.29% - 6.62%)    | 0.88%<br>(0.37% - 1.58%)    | 0.84%<br>(0.33% - 1.51%)    | 0.80%<br>(0.27% - 1.56%)  | 0.66%<br>(0.16% - 1.28%)  |
| <i>Garissa</i>                    | 44.03%<br>(40.89% - 47.56%) | 43.97%<br>(40.39% - 47.74%) | 39.71%<br>(35.44% - 44.07%) | 36.67%<br>(33.70% - 40.13%) | 17.31%<br>(14.56% - 20.20%) | 16.49%<br>(13.81% - 19.55%) | 12.45%<br>(9.44% - 15.73%)  | 12.41%<br>(9.88% - 14.78%)  | 3.93%<br>(2.23% - 6.34%)    | 3.38%<br>(2.01% - 5.50%)    | 2.03%<br>(1.06% - 3.58%)  | 2.43%<br>(1.25% - 4.05%)  |
| <i>HomaBay</i>                    | 40.50%<br>(38.40% - 43.02%) | 37.11%<br>(34.95% - 39.59%) | 30.38%<br>(28.45% - 32.36%) | 24.36%<br>(22.42% - 26.33%) | 19.04%<br>(16.16% - 21.99%) | 16.74%<br>(14.17% - 19.31%) | 11.71%<br>(9.36% - 14.09%)  | 8.06%<br>(6.01% - 10.08%)   | 6.63%<br>(4.00% - 9.70%)    | 5.68%<br>(3.34% - 8.43%)    | 3.40%<br>(1.71% - 5.39%)  | 1.73%<br>(0.72% - 2.98%)  |
| <i>Isiolo</i>                     | 18.20%<br>(15.92% - 20.40%) | 17.39%<br>(15.25% - 19.54%) | 18.62%<br>(16.49% - 20.82%) | 16.33%<br>(14.46% - 18.17%) | 4.51%<br>(2.85% - 6.09%)    | 3.91%<br>(2.50% - 5.32%)    | 4.42%<br>(2.74% - 6.22%)    | 4.19%<br>(2.89% - 5.63%)    | 0.69%<br>(0.20% - 1.35%)    | 0.50%<br>(0.13% - 1.06%)    | 0.55%<br>(0.12% - 1.19%)  | 0.57%<br>(0.18% - 1.15%)  |
| <i>Kajiado</i>                    | 29.96%<br>(28.12% - 31.63%) | 28.93%<br>(26.96% - 30.60%) | 24.49%<br>(22.54% - 26.37%) | 20.10%<br>(18.19% - 22.03%) | 14.27%<br>(11.86% - 16.67%) | 13.26%<br>(10.97% - 15.51%) | 9.24%<br>(6.97% - 11.33%)   | 6.87%<br>(5.09% - 8.70%)    | 5.42%<br>(3.37% - 7.78%)    | 4.70%<br>(2.87% - 6.76%)    | 2.33%<br>(1.13% - 3.68%)  | 1.48%<br>(0.70% - 2.48%)  |
| <i>Kakamega</i>                   | 36.44%<br>(34.57% - 38.82%) | 39.06%<br>(36.64% - 42.08%) | 38.22%<br>(36.00% - 40.94%) | 33.70%<br>(31.76% - 35.70%) | 15.12%<br>(12.92% - 17.27%) | 15.50%<br>(13.22% - 17.97%) | 15.52%<br>(13.53% - 17.72%) | 13.50%<br>(11.15% - 15.68%) | 4.21%<br>(2.86% - 5.85%)    | 4.06%<br>(2.76% - 5.78%)    | 4.07%<br>(2.84% - 5.78%)  | 3.58%<br>(2.25% - 5.15%)  |
| <i>Kericho</i>                    | 43.22%<br>(40.70% - 46.39%) | 42.41%<br>(39.63% - 45.73%) | 39.58%<br>(36.71% - 43.35%) | 31.88%<br>(29.43% - 34.48%) | 21.00%<br>(18.56% - 23.52%) | 18.97%<br>(16.57% - 21.44%) | 15.15%<br>(12.74% - 17.79%) | 10.83%<br>(8.29% - 13.32%)  | 7.33%<br>(5.44% - 9.62%)    | 5.62%<br>(3.97% - 7.73%)    | 3.49%<br>(2.09% - 5.37%)  | 2.18%<br>(1.06% - 3.58%)  |
| <i>Kiambu</i>                     | 37.00%<br>(35.37% - 38.78%) | 35.07%<br>(33.45% - 36.69%) | 29.92%<br>(28.29% - 31.52%) | 24.70%<br>(23.13% - 26.26%) | 17.47%<br>(15.13% - 19.96%) | 15.78%<br>(13.62% - 17.86%) | 12.29%<br>(10.29% - 14.39%) | 9.31%<br>(7.69% - 10.92%)   | 5.82%<br>(3.89% - 8.19%)    | 4.96%<br>(3.34% - 6.84%)    | 3.48%<br>(2.25% - 5.12%)  | 2.36%<br>(1.44% - 3.41%)  |

Table S8a. Estimated overall, severe, and extreme **stunting** prevalence (%) in children under 5 years, both sexes, in 1990, 2000, 2010, and 2020.

| Location         | Total                       |                             |                             |                             | Severe                      |                             |                             |                             | Extreme                     |                             |                           |                             |
|------------------|-----------------------------|-----------------------------|-----------------------------|-----------------------------|-----------------------------|-----------------------------|-----------------------------|-----------------------------|-----------------------------|-----------------------------|---------------------------|-----------------------------|
|                  | 1990                        | 2000                        | 2010                        | 2020                        | 1990                        | 2000                        | 2010                        | 2020                        | 1990                        | 2000                        | 2010                      | 2020                        |
| <i>Kilifi</i>    | 44.69%<br>(42.61% - 47.96%) | 43.21%<br>(41.02% - 46.40%) | 36.80%<br>(34.58% - 39.81%) | 32.07%<br>(30.27% - 34.10%) | 22.04%<br>(19.57% - 24.92%) | 20.14%<br>(17.95% - 22.81%) | 14.39%<br>(12.23% - 16.71%) | 12.59%<br>(10.45% - 14.79%) | 8.10%<br>(5.65% - 11.01%)   | 6.81%<br>(4.69% - 9.53%)    | 3.82%<br>(2.47% - 5.53%)  | 3.31%<br>(2.03% - 4.82%)    |
| <i>Kirinyaga</i> | 21.78%<br>(19.02% - 24.31%) | 19.82%<br>(17.56% - 22.02%) | 17.82%<br>(15.63% - 20.19%) | 16.16%<br>(14.09% - 18.44%) | 4.45%<br>(2.47% - 6.41%)    | 3.71%<br>(2.00% - 5.38%)    | 3.32%<br>(1.88% - 4.95%)    | 3.11%<br>(1.70% - 4.60%)    | 0.40%<br>(0.10% - 0.92%)    | 0.27%<br>(0.03% - 0.67%)    | 0.25%<br>(0.03% - 0.67%)  | 0.24%<br>(0.02% - 0.67%)    |
| <i>Kisii</i>     | 36.54%<br>(34.38% - 39.51%) | 37.48%<br>(35.00% - 40.46%) | 34.09%<br>(32.14% - 36.28%) | 29.45%<br>(27.43% - 31.44%) | 14.13%<br>(11.86% - 16.44%) | 13.75%<br>(11.54% - 16.05%) | 11.64%<br>(9.43% - 13.96%)  | 9.61%<br>(7.39% - 11.66%)   | 3.47%<br>(2.10% - 5.15%)    | 3.02%<br>(1.79% - 4.53%)    | 2.45%<br>(1.26% - 3.89%)  | 1.97%<br>(0.93% - 3.24%)    |
| <i>Kisumu</i>    | 36.09%<br>(34.37% - 37.94%) | 37.32%<br>(35.30% - 39.27%) | 31.92%<br>(29.61% - 34.49%) | 24.97%<br>(22.84% - 27.18%) | 17.97%<br>(15.54% - 20.25%) | 18.83%<br>(16.36% - 21.20%) | 12.62%<br>(10.46% - 14.72%) | 8.53%<br>(6.44% - 10.53%)   | 6.65%<br>(4.65% - 8.77%)    | 7.07%<br>(4.89% - 9.39%)    | 3.32%<br>(2.15% - 4.68%)  | 1.86%<br>(1.03% - 2.82%)    |
| <i>Kitui</i>     | 44.54%<br>(42.32% - 47.60%) | 42.82%<br>(40.59% - 45.92%) | 39.17%<br>(37.02% - 41.81%) | 35.69%<br>(33.79% - 37.73%) | 22.24%<br>(19.01% - 25.47%) | 20.14%<br>(17.45% - 23.15%) | 16.71%<br>(14.17% - 19.28%) | 15.05%<br>(12.45% - 17.44%) | 8.36%<br>(4.94% - 12.38%)   | 6.85%<br>(4.29% - 10.28%)   | 4.99%<br>(2.78% - 7.76%)  | 4.44%<br>(2.53% - 6.73%)    |
| <i>Kwale</i>     | 38.64%<br>(36.38% - 41.47%) | 38.22%<br>(35.85% - 41.04%) | 34.04%<br>(31.91% - 36.42%) | 28.39%<br>(26.49% - 30.47%) | 15.55%<br>(12.78% - 18.34%) | 15.82%<br>(13.20% - 18.65%) | 13.16%<br>(10.71% - 15.63%) | 10.04%<br>(7.84% - 12.28%)  | 4.15%<br>(2.07% - 6.65%)    | 4.38%<br>(2.35% - 7.01%)    | 3.44%<br>(1.86% - 5.45%)  | 2.33%<br>(1.18% - 3.79%)    |
| <i>Laikipia</i>  | 28.65%<br>(26.15% - 31.20%) | 27.59%<br>(25.06% - 30.26%) | 27.77%<br>(25.25% - 30.74%) | 23.65%<br>(21.44% - 25.93%) | 9.06%<br>(6.63% - 11.40%)   | 8.13%<br>(6.15% - 10.33%)   | 7.95%<br>(5.75% - 10.12%)   | 6.85%<br>(4.85% - 9.00%)    | 2.14%<br>(1.09% - 3.58%)    | 1.74%<br>(0.85% - 2.97%)    | 1.38%<br>(0.57% - 2.53%)  | 1.21%<br>(0.41% - 2.25%)    |
| <i>Lamu</i>      | 19.57%<br>(17.18% - 21.95%) | 19.91%<br>(17.47% - 22.60%) | 23.33%<br>(20.87% - 25.82%) | 21.61%<br>(19.40% - 23.84%) | 3.55%<br>(2.04% - 5.19%)    | 3.35%<br>(1.79% - 5.08%)    | 5.52%<br>(3.57% - 7.51%)    | 5.83%<br>(4.01% - 7.78%)    | 0.37%<br>(0.14% - 0.79%)    | 0.33%<br>(0.11% - 0.71%)    | 0.83%<br>(0.22% - 1.68%)  | 1.02%<br>(0.30% - 1.95%)    |
| <i>Machakos</i>  | 40.88%<br>(38.95% - 43.62%) | 40.36%<br>(38.24% - 43.35%) | 34.65%<br>(32.25% - 37.87%) | 29.64%<br>(27.64% - 31.82%) | 19.90%<br>(17.43% - 22.79%) | 18.76%<br>(16.30% - 21.51%) | 13.05%<br>(10.71% - 15.36%) | 10.79%<br>(8.41% - 12.99%)  | 6.92%<br>(4.67% - 9.90%)    | 5.97%<br>(3.83% - 8.84%)    | 3.03%<br>(1.70% - 4.74%)  | 2.43%<br>(1.30% - 3.77%)    |
| <i>Makueni</i>   | 37.49%<br>(35.17% - 40.28%) | 38.58%<br>(35.98% - 41.25%) | 35.46%<br>(33.02% - 38.28%) | 28.72%<br>(26.34% - 31.01%) | 13.88%<br>(11.34% - 16.64%) | 14.28%<br>(11.47% - 17.00%) | 12.69%<br>(10.18% - 15.20%) | 9.20%<br>(6.96% - 11.43%)   | 3.64%<br>(1.91% - 5.73%)    | 3.43%<br>(1.74% - 5.52%)    | 2.84%<br>(1.43% - 4.79%)  | 1.81%<br>(0.78% - 3.05%)    |
| <i>Mandera</i>   | 45.96%<br>(44.37% - 47.45%) | 46.02%<br>(44.39% - 47.83%) | 45.34%<br>(43.41% - 47.98%) | 47.04%<br>(45.22% - 49.26%) | 29.53%<br>(26.32% - 32.57%) | 28.77%<br>(25.43% - 32.32%) | 24.25%<br>(21.58% - 27.11%) | 29.21%<br>(26.09% - 32.53%) | 15.83%<br>(11.98% - 19.48%) | 14.74%<br>(10.96% - 19.11%) | 9.65%<br>(6.78% - 12.89%) | 14.71%<br>(10.76% - 19.03%) |
| <i>Marsabit</i>  | 21.39%<br>(19.17% - 23.53%) | 20.57%<br>(18.24% - 22.74%) | 23.24%<br>(21.05% - 25.54%) | 20.75%<br>(18.62% - 22.69%) | 5.50%<br>(3.58% - 7.34%)    | 4.88%<br>(3.17% - 6.69%)    | 6.05%<br>(3.89% - 8.13%)    | 4.75%<br>(2.92% - 6.51%)    | 0.78%<br>(0.23% - 1.54%)    | 0.61%<br>(0.16% - 1.32%)    | 0.85%<br>(0.20% - 1.78%)  | 0.50%<br>(0.10% - 1.14%)    |
| <i>Meru</i>      | 34.37%<br>(32.13% - 36.78%) | 35.32%<br>(33.07% - 37.98%) | 33.24%<br>(30.90% - 36.06%) | 28.81%<br>(26.57% - 31.04%) | 13.77%<br>(11.17% - 15.94%) | 13.77%<br>(11.56% - 16.06%) | 11.65%<br>(9.15% - 14.06%)  | 9.71%<br>(7.41% - 11.91%)   | 3.65%<br>(2.42% - 5.16%)    | 3.43%<br>(2.27% - 4.88%)    | 2.45%<br>(1.38% - 3.91%)  | 1.99%<br>(1.03% - 3.22%)    |
| <i>Migori</i>    | 43.37%<br>(40.16% - 46.98%) | 38.27%<br>(35.52% - 41.89%) | 36.59%<br>(33.83% - 39.72%) | 29.79%<br>(27.09% - 32.14%) | 18.61%<br>(15.70% - 21.66%) | 15.79%<br>(13.28% - 18.55%) | 14.11%<br>(11.77% - 16.79%) | 10.53%<br>(7.70% - 12.83%)  | 5.54%<br>(3.34% - 8.42%)    | 4.64%<br>(2.68% - 6.97%)    | 3.35%<br>(1.92% - 5.31%)  | 2.49%<br>(1.24% - 3.99%)    |
| <i>Mombasa</i>   | 26.78%<br>(24.80% - 28.70%) | 25.76%<br>(23.87% - 27.76%) | 25.33%<br>(23.39% - 27.29%) | 21.22%<br>(19.36% - 23.08%) | 10.11%<br>(7.83% - 12.08%)  | 9.11%<br>(6.93% - 11.15%)   | 8.55%<br>(6.52% - 10.60%)   | 6.61%<br>(4.89% - 8.32%)    | 2.50%<br>(1.34% - 3.80%)    | 2.02%<br>(1.04% - 3.26%)    | 1.75%<br>(0.83% - 2.93%)  | 1.23%<br>(0.51% - 2.10%)    |
| <i>Murang'a</i>  | 33.75%<br>(31.95% - 35.62%) | 33.94%<br>(32.11% - 35.93%) | 28.15%<br>(26.06% - 30.09%) | 24.17%<br>(22.00% - 26.24%) | 15.23%<br>(12.84% - 17.37%) | 15.18%<br>(12.75% - 17.50%) | 10.27%<br>(8.24% - 12.48%)  | 7.87%<br>(5.93% - 9.95%)    | 4.87%<br>(3.17% - 6.70%)    | 4.83%<br>(2.96% - 6.94%)    | 2.46%<br>(1.32% - 3.91%)  | 1.61%<br>(0.74% - 2.81%)    |
| <i>Nairobi</i>   | 24.42%<br>(23.07% - 25.77%) | 24.32%<br>(22.89% - 25.65%) | 21.88%<br>(20.50% - 23.24%) | 19.78%<br>(18.29% - 21.16%) | 9.79%<br>(8.48% - 11.20%)   | 9.33%<br>(8.01% - 10.82%)   | 7.63%<br>(6.38% - 8.95%)    | 6.65%<br>(5.39% - 7.86%)    | 2.66%<br>(1.90% - 3.49%)    | 2.35%<br>(1.63% - 3.22%)    | 1.65%<br>(1.07% - 2.34%)  | 1.36%<br>(0.83% - 2.02%)    |
| <i>Nakuru</i>    | 38.56%<br>(36.55% - 41.00%) | 40.84%<br>(38.49% - 44.12%) | 37.21%<br>(34.70% - 40.23%) | 30.12%<br>(28.10% - 32.36%) | 17.66%<br>(15.42% - 20.32%) | 18.06%<br>(15.62% - 20.42%) | 14.25%<br>(11.95% - 16.67%) | 10.65%<br>(8.24% - 12.94%)  | 5.97%<br>(4.27% - 8.22%)    | 5.52%<br>(3.78% - 7.50%)    | 3.34%<br>(1.93% - 5.06%)  | 2.32%<br>(1.17% - 3.75%)    |
| <i>Nandi</i>     | 36.27%<br>(33.92% - 39.04%) | 36.48%<br>(33.87% - 39.39%) | 33.39%<br>(31.21% - 35.87%) | 26.87%<br>(24.70% - 28.94%) | 15.40%<br>(12.78% - 17.85%) | 14.99%<br>(12.30% - 17.58%) | 12.68%<br>(9.95% - 15.11%)  | 9.39%<br>(7.16% - 11.49%)   | 5.03%<br>(3.46% - 6.89%)    | 4.87%<br>(3.22% - 6.75%)    | 3.24%<br>(1.85% - 4.95%)  | 2.13%<br>(1.02% - 3.44%)    |
| <i>Narok</i>     | 36.69%<br>(34.16% - 39.69%) | 36.69%<br>(34.00% - 39.73%) | 34.19%<br>(31.44% - 37.51%) | 29.42%<br>(27.04% - 31.99%) | 13.59%<br>(11.10% - 16.07%) | 13.79%<br>(11.38% - 16.28%) | 10.86%<br>(8.53% - 13.24%)  | 8.76%<br>(6.24% - 11.12%)   | 3.26%<br>(1.69% - 5.38%)    | 3.35%<br>(1.72% - 5.38%)    | 2.01%<br>(0.98% - 3.39%)  | 1.57%<br>(0.56% - 2.79%)    |
| <i>Nyamira</i>   | 31.55%<br>(29.58% - 33.64%) | 32.15%<br>(30.00% - 34.44%) | 34.04%<br>(31.70% - 37.19%) | 29.82%<br>(27.89% - 32.04%) | 12.27%<br>(10.01% - 14.61%) | 11.94%<br>(9.46% - 14.34%)  | 13.12%<br>(10.66% - 15.65%) | 11.81%<br>(9.42% - 14.18%)  | 3.19%<br>(2.02% - 4.73%)    | 2.93%<br>(1.79% - 4.32%)    | 3.34%<br>(2.03% - 5.08%)  | 3.13%<br>(1.82% - 4.73%)    |
| <i>Nyandarua</i> | 27.72%<br>(25.73% - 29.83%) | 29.41%<br>(27.13% - 32.31%) | 30.28%<br>(27.79% - 33.73%) | 28.26%<br>(26.07% - 31.16%) | 10.13%<br>(7.92% - 12.30%)  | 10.35%<br>(8.07% - 12.45%)  | 10.29%<br>(8.03% - 12.46%)  | 9.55%<br>(6.85% - 11.84%)   | 2.60%<br>(1.60% - 3.81%)    | 2.49%<br>(1.48% - 3.71%)    | 2.19%<br>(1.21% - 3.46%)  | 2.01%<br>(0.97% - 3.30%)    |

Table S8a. Estimated overall, severe, and extreme **stunting** prevalence (%) in children under 5 years, both sexes, in 1990, 2000, 2010, and 2020.

| Location                    | Total                       |                             |                             |                             | Severe                      |                             |                             |                             | Extreme                     |                             |                            |                            |
|-----------------------------|-----------------------------|-----------------------------|-----------------------------|-----------------------------|-----------------------------|-----------------------------|-----------------------------|-----------------------------|-----------------------------|-----------------------------|----------------------------|----------------------------|
|                             | 1990                        | 2000                        | 2010                        | 2020                        | 1990                        | 2000                        | 2010                        | 2020                        | 1990                        | 2000                        | 2010                       | 2020                       |
| Nyeri                       | 29.27%<br>(27.37% - 31.18%) | 28.27%<br>(26.33% - 30.37%) | 24.35%<br>(22.05% - 26.64%) | 21.12%<br>(18.74% - 23.36%) | 12.22%<br>(10.08% - 14.50%) | 10.51%<br>(8.38% - 12.76%)  | 7.48%<br>(5.28% - 9.52%)    | 5.94%<br>(4.07% - 7.81%)    | 3.70%<br>(2.33% - 5.36%)    | 2.59%<br>(1.51% - 3.97%)    | 1.41%<br>(0.60% - 2.40%)   | 0.95%<br>(0.34% - 1.74%)   |
| Samburu                     | 37.91%<br>(34.39% - 42.02%) | 38.15%<br>(34.09% - 42.37%) | 37.27%<br>(32.31% - 42.28%) | 30.99%<br>(27.29% - 35.76%) | 12.43%<br>(10.01% - 15.30%) | 11.67%<br>(8.94% - 14.85%)  | 10.45%<br>(7.86% - 13.76%)  | 7.57%<br>(4.78% - 10.09%)   | 2.42%<br>(1.21% - 4.02%)    | 1.93%<br>(0.92% - 3.42%)    | 1.39%<br>(0.65% - 2.64%)   | 0.89%<br>(0.32% - 1.86%)   |
| Siaya                       | 44.18%<br>(40.87% - 48.17%) | 44.04%<br>(40.30% - 48.01%) | 40.64%<br>(37.19% - 44.79%) | 30.88%<br>(28.26% - 33.82%) | 18.00%<br>(15.73% - 20.65%) | 16.48%<br>(14.05% - 19.56%) | 13.72%<br>(11.09% - 16.57%) | 9.01%<br>(6.61% - 11.35%)   | 4.40%<br>(3.05% - 6.20%)    | 3.31%<br>(2.18% - 4.79%)    | 2.42%<br>(1.37% - 4.00%)   | 1.41%<br>(0.51% - 2.67%)   |
| TaitaTaveta                 | 34.65%<br>(31.73% - 38.48%) | 33.47%<br>(29.76% - 38.32%) | 28.68%<br>(24.62% - 34.39%) | 21.65%<br>(18.98% - 23.99%) | 11.74%<br>(9.51% - 14.26%)  | 9.33%<br>(6.65% - 12.37%)   | 6.49%<br>(3.74% - 9.67%)    | 4.85%<br>(2.72% - 6.97%)    | 2.42%<br>(1.35% - 3.83%)    | 1.50%<br>(0.72% - 2.56%)    | 0.83%<br>(0.35% - 1.59%)   | 0.58%<br>(0.22% - 1.23%)   |
| TanaRiver                   | 29.57%<br>(26.86% - 32.93%) | 31.66%<br>(28.82% - 35.08%) | 30.58%<br>(27.68% - 34.34%) | 22.81%<br>(19.83% - 26.30%) | 9.73%<br>(6.80% - 12.29%)   | 10.26%<br>(7.33% - 12.75%)  | 9.71%<br>(6.83% - 12.34%)   | 4.75%<br>(2.29% - 7.07%)    | 1.86%<br>(0.75% - 3.31%)    | 1.85%<br>(0.80% - 3.31%)    | 1.71%<br>(0.70% - 3.09%)   | 0.46%<br>(0.07% - 1.13%)   |
| TharakaNithi                | 29.40%<br>(26.79% - 32.71%) | 30.57%<br>(27.71% - 35.17%) | 29.46%<br>(26.50% - 33.56%) | 23.75%<br>(21.25% - 26.03%) | 8.07%<br>(5.52% - 10.64%)   | 7.40%<br>(4.79% - 9.85%)    | 7.03%<br>(4.19% - 9.49%)    | 5.54%<br>(3.42% - 7.47%)    | 1.31%<br>(0.56% - 2.37%)    | 1.02%<br>(0.45% - 1.85%)    | 0.86%<br>(0.28% - 1.79%)   | 0.65%<br>(0.14% - 1.47%)   |
| TransNzoia                  | 38.47%<br>(35.92% - 41.83%) | 37.43%<br>(34.66% - 40.73%) | 36.02%<br>(32.96% - 39.71%) | 29.87%<br>(27.01% - 33.40%) | 14.45%<br>(12.17% - 17.03%) | 13.06%<br>(10.87% - 15.76%) | 11.54%<br>(9.03% - 14.29%)  | 9.02%<br>(6.85% - 11.55%)   | 3.24%<br>(1.88% - 5.20%)    | 2.55%<br>(1.43% - 4.24%)    | 1.92%<br>(1.05% - 3.36%)   | 1.50%<br>(0.66% - 2.92%)   |
| Turkana                     | 27.70%<br>(25.78% - 29.63%) | 26.18%<br>(24.40% - 28.04%) | 26.83%<br>(25.06% - 28.65%) | 23.40%<br>(21.51% - 25.37%) | 12.92%<br>(10.56% - 15.43%) | 12.05%<br>(9.90% - 14.31%)  | 11.04%<br>(8.91% - 13.06%)  | 7.57%<br>(5.47% - 9.60%)    | 4.56%<br>(2.82% - 6.78%)    | 4.14%<br>(2.61% - 5.88%)    | 3.14%<br>(1.78% - 4.66%)   | 1.46%<br>(0.64% - 2.53%)   |
| UasinGishu                  | 33.96%<br>(32.06% - 36.06%) | 33.16%<br>(31.21% - 35.30%) | 32.01%<br>(30.05% - 34.16%) | 28.04%<br>(26.03% - 30.01%) | 15.39%<br>(13.06% - 17.75%) | 14.60%<br>(12.41% - 16.86%) | 13.11%<br>(10.95% - 15.35%) | 11.40%<br>(9.42% - 13.58%)  | 5.04%<br>(3.42% - 6.93%)    | 4.61%<br>(3.09% - 6.50%)    | 3.95%<br>(2.54% - 5.66%)   | 3.47%<br>(2.24% - 5.03%)   |
| Vihiga                      | 34.81%<br>(31.55% - 38.76%) | 33.72%<br>(29.95% - 38.39%) | 32.27%<br>(28.14% - 37.88%) | 26.72%<br>(23.87% - 29.50%) | 9.78%<br>(7.07% - 12.33%)   | 8.20%<br>(5.07% - 10.99%)   | 6.61%<br>(3.19% - 9.47%)    | 5.76%<br>(2.90% - 8.23%)    | 1.44%<br>(0.60% - 2.68%)    | 1.01%<br>(0.34% - 1.98%)    | 0.62%<br>(0.16% - 1.42%)   | 0.61%<br>(0.15% - 1.38%)   |
| Wajir                       | 55.06%<br>(51.03% - 58.44%) | 55.52%<br>(51.89% - 58.48%) | 50.43%<br>(46.60% - 53.85%) | 46.57%<br>(41.95% - 50.30%) | 22.71%<br>(17.80% - 28.26%) | 24.31%<br>(19.60% - 29.61%) | 20.79%<br>(16.12% - 25.84%) | 14.47%<br>(9.26% - 20.43%)  | 4.81%<br>(2.28% - 9.12%)    | 5.85%<br>(2.77% - 10.18%)   | 4.63%<br>(2.10% - 8.93%)   | 2.00%<br>(0.50% - 4.98%)   |
| WestPokot                   | 51.90%<br>(48.33% - 57.60%) | 51.43%<br>(47.10% - 56.69%) | 47.82%<br>(44.36% - 52.14%) | 42.99%<br>(40.31% - 46.46%) | 23.19%<br>(19.26% - 27.67%) | 21.08%<br>(17.71% - 25.02%) | 21.91%<br>(18.65% - 25.25%) | 20.42%<br>(17.64% - 23.32%) | 7.11%<br>(4.00% - 12.05%)   | 5.46%<br>(3.11% - 9.40%)    | 6.57%<br>(4.05% - 9.94%)   | 6.72%<br>(4.34% - 9.77%)   |
| Madagascar                  | 51.36%<br>(49.90% - 52.99%) | 50.96%<br>(49.29% - 53.08%) | 47.89%<br>(46.25% - 50.07%) | 45.19%<br>(43.58% - 47.06%) | 31.65%<br>(29.36% - 33.90%) | 30.93%<br>(28.92% - 33.15%) | 27.53%<br>(25.65% - 29.50%) | 25.08%<br>(22.88% - 27.37%) | 15.12%<br>(12.20% - 18.72%) | 14.33%<br>(11.68% - 17.68%) | 11.68%<br>(9.44% - 14.22%) | 10.15%<br>(7.78% - 13.01%) |
| Malawi                      | 49.01%<br>(46.81% - 51.64%) | 47.09%<br>(45.16% - 49.64%) | 38.21%<br>(36.95% - 39.78%) | 30.14%<br>(28.91% - 31.43%) | 23.87%<br>(21.71% - 26.19%) | 23.07%<br>(21.37% - 24.90%) | 16.30%<br>(14.82% - 17.86%) | 10.58%<br>(9.10% - 11.98%)  | 7.34%<br>(5.44% - 10.00%)   | 7.38%<br>(5.62% - 9.53%)    | 4.42%<br>(3.34% - 5.74%)   | 2.18%<br>(1.44% - 2.94%)   |
| Mozambique                  | 50.64%<br>(48.31% - 53.03%) | 45.34%<br>(43.47% - 47.60%) | 38.59%<br>(36.94% - 40.71%) | 33.13%<br>(31.54% - 35.02%) | 24.96%<br>(22.67% - 27.42%) | 21.51%<br>(19.75% - 23.45%) | 15.52%<br>(14.01% - 17.15%) | 12.27%<br>(10.70% - 13.91%) | 7.73%<br>(5.55% - 10.51%)   | 6.60%<br>(4.93% - 8.65%)    | 3.74%<br>(2.69% - 5.05%)   | 2.69%<br>(1.82% - 3.80%)   |
| Rwanda                      | 46.58%<br>(44.93% - 48.61%) | 46.21%<br>(44.62% - 48.17%) | 39.98%<br>(38.56% - 41.93%) | 35.14%<br>(33.64% - 36.74%) | 25.00%<br>(22.96% - 27.16%) | 24.87%<br>(23.17% - 26.67%) | 18.09%<br>(16.59% - 19.71%) | 14.27%<br>(12.47% - 15.97%) | 9.57%<br>(7.18% - 12.56%)   | 9.55%<br>(7.43% - 12.00%)   | 5.34%<br>(4.02% - 6.86%)   | 3.64%<br>(2.48% - 4.85%)   |
| Somalia                     | 33.00%<br>(31.62% - 34.43%) | 32.46%<br>(31.23% - 33.57%) | 32.59%<br>(31.51% - 33.76%) | 31.55%<br>(30.21% - 32.95%) | 16.12%<br>(14.44% - 17.85%) | 16.67%<br>(15.06% - 18.33%) | 16.20%<br>(14.60% - 17.75%) | 14.84%<br>(13.15% - 16.55%) | 5.71%<br>(4.42% - 7.23%)    | 6.43%<br>(5.14% - 7.95%)    | 5.91%<br>(4.61% - 7.42%)   | 4.97%<br>(3.73% - 6.49%)   |
| United Republic of Tanzania | 45.78%<br>(44.17% - 47.70%) | 43.91%<br>(42.45% - 45.71%) | 38.45%<br>(37.20% - 39.95%) | 33.24%<br>(32.02% - 34.61%) | 21.67%<br>(20.14% - 23.32%) | 20.29%<br>(18.91% - 21.71%) | 16.13%<br>(14.92% - 17.40%) | 12.91%<br>(11.44% - 14.44%) | 6.55%<br>(5.12% - 8.38%)    | 5.99%<br>(4.71% - 7.50%)    | 4.41%<br>(3.49% - 5.52%)   | 3.15%<br>(2.25% - 4.21%)   |
| Uganda                      | 43.91%<br>(42.32% - 45.85%) | 41.63%<br>(40.19% - 43.56%) | 34.42%<br>(33.33% - 35.64%) | 28.82%<br>(27.69% - 30.07%) | 21.18%<br>(19.55% - 22.87%) | 19.09%<br>(17.54% - 20.53%) | 13.98%<br>(12.89% - 15.10%) | 10.46%<br>(9.10% - 11.85%)  | 6.82%<br>(5.15% - 8.83%)    | 5.72%<br>(4.23% - 7.23%)    | 3.59%<br>(2.80% - 4.48%)   | 2.30%<br>(1.59% - 3.10%)   |
| Zambia                      | 46.84%<br>(45.00% - 49.07%) | 48.66%<br>(47.06% - 50.46%) | 43.84%<br>(42.65% - 45.22%) | 32.39%<br>(31.05% - 33.75%) | 25.10%<br>(23.04% - 27.30%) | 28.77%<br>(27.02% - 30.61%) | 24.75%<br>(23.16% - 26.30%) | 14.67%<br>(13.13% - 16.27%) | 9.47%<br>(7.15% - 12.43%)   | 12.90%<br>(10.52% - 15.68%) | 10.55%<br>(8.78% - 12.39%) | 4.58%<br>(3.53% - 5.78%)   |
| South Sudan                 | 37.39%<br>(36.09% - 38.65%) | 37.09%<br>(36.17% - 38.01%) | 30.74%<br>(30.03% - 31.45%) | 28.99%<br>(27.83% - 30.17%) | 21.23%<br>(19.32% - 23.10%) | 22.13%<br>(20.83% - 23.49%) | 16.40%<br>(15.57% - 17.26%) | 14.38%<br>(12.96% - 15.81%) | 9.42%<br>(7.47% - 11.39%)   | 10.73%<br>(9.39% - 12.12%)  | 6.82%<br>(6.09% - 7.57%)   | 5.32%<br>(4.18% - 6.45%)   |

Table S8a. Estimated overall, severe, and extreme **stunting** prevalence (%) in children under 5 years, both sexes, in 1990, 2000, 2010, and 2020.

| Location                           | Total                       |                             |                             |                             | Severe                      |                             |                             |                             | Extreme                    |                            |                           |                          |
|------------------------------------|-----------------------------|-----------------------------|-----------------------------|-----------------------------|-----------------------------|-----------------------------|-----------------------------|-----------------------------|----------------------------|----------------------------|---------------------------|--------------------------|
|                                    | 1990                        | 2000                        | 2010                        | 2020                        | 1990                        | 2000                        | 2010                        | 2020                        | 1990                       | 2000                       | 2010                      | 2020                     |
| <b>Southern Sub-Saharan Africa</b> | 31.03%<br>(30.55% - 31.52%) | 30.87%<br>(30.41% - 31.32%) | 28.45%<br>(28.00% - 28.88%) | 23.73%<br>(23.28% - 24.23%) | 11.41%<br>(10.91% - 11.93%) | 11.79%<br>(11.33% - 12.24%) | 10.03%<br>(9.63% - 10.45%)  | 7.40%<br>(6.97% - 7.85%)    | 2.67%<br>(2.41% - 2.98%)   | 2.89%<br>(2.63% - 3.17%)   | 2.18%<br>(1.95% - 2.42%)  | 1.38%<br>(1.20% - 1.58%) |
| Botswana                           | 33.50%<br>(31.98% - 35.33%) | 31.53%<br>(30.30% - 32.88%) | 30.03%<br>(28.81% - 31.34%) | 26.19%<br>(24.78% - 27.58%) | 13.09%<br>(11.46% - 14.74%) | 12.30%<br>(10.82% - 13.66%) | 11.95%<br>(10.61% - 13.28%) | 9.86%<br>(8.53% - 11.29%)   | 3.26%<br>(2.39% - 4.37%)   | 3.08%<br>(2.29% - 3.98%)   | 3.15%<br>(2.41% - 4.02%)  | 2.40%<br>(1.73% - 3.17%) |
| Lesotho                            | 40.77%<br>(39.56% - 42.06%) | 43.09%<br>(41.67% - 44.75%) | 39.11%<br>(37.32% - 41.35%) | 33.35%<br>(31.91% - 35.02%) | 21.14%<br>(19.35% - 22.97%) | 21.61%<br>(19.82% - 23.54%) | 15.63%<br>(13.98% - 17.33%) | 11.89%<br>(10.24% - 13.48%) | 8.01%<br>(6.54% - 9.68%)   | 7.70%<br>(6.07% - 9.65%)   | 3.78%<br>(2.64% - 5.18%)  | 2.47%<br>(1.61% - 3.41%) |
| Namibia                            | 32.22%<br>(31.20% - 33.37%) | 30.03%<br>(28.92% - 31.20%) | 27.01%<br>(25.98% - 28.00%) | 22.17%<br>(20.83% - 23.44%) | 13.13%<br>(11.89% - 14.47%) | 11.26%<br>(10.02% - 12.45%) | 9.93%<br>(8.78% - 11.03%)   | 7.54%<br>(6.40% - 8.68%)    | 3.49%<br>(2.71% - 4.38%)   | 2.64%<br>(1.92% - 3.39%)   | 2.29%<br>(1.69% - 2.97%)  | 1.53%<br>(1.01% - 2.11%) |
| South Africa                       | 30.17%<br>(29.61% - 30.74%) | 29.92%<br>(29.46% - 30.43%) | 26.18%<br>(25.69% - 26.66%) | 22.23%<br>(21.68% - 22.78%) | 10.79%<br>(10.16% - 11.42%) | 11.06%<br>(10.53% - 11.58%) | 8.97%<br>(8.55% - 9.43%)    | 6.83%<br>(6.43% - 7.27%)    | 2.44%<br>(2.14% - 2.79%)   | 2.59%<br>(2.33% - 2.87%)   | 1.93%<br>(1.73% - 2.15%)  | 1.32%<br>(1.16% - 1.49%) |
| Eswatini                           | 36.14%<br>(34.49% - 38.61%) | 35.28%<br>(33.66% - 37.17%) | 31.89%<br>(30.45% - 33.36%) | 26.67%<br>(25.26% - 28.10%) | 12.88%<br>(11.18% - 14.74%) | 12.87%<br>(11.43% - 14.35%) | 10.69%<br>(9.30% - 12.08%)  | 8.54%<br>(7.03% - 10.05%)   | 2.62%<br>(1.75% - 3.76%)   | 2.73%<br>(1.98% - 3.68%)   | 1.99%<br>(1.33% - 2.78%)  | 1.55%<br>(0.91% - 2.34%) |
| Zimbabwe                           | 31.08%<br>(29.78% - 32.41%) | 31.45%<br>(30.25% - 32.68%) | 32.77%<br>(31.67% - 34.04%) | 26.02%<br>(24.78% - 27.33%) | 11.16%<br>(9.80% - 12.66%)  | 12.38%<br>(11.06% - 13.69%) | 11.85%<br>(10.69% - 13.13%) | 7.93%<br>(6.62% - 9.16%)    | 2.38%<br>(1.60% - 3.27%)   | 3.10%<br>(2.25% - 4.02%)   | 2.54%<br>(1.82% - 3.38%)  | 1.30%<br>(0.78% - 1.88%) |
| <b>Western Sub-Saharan Africa</b>  | 40.56%<br>(39.84% - 41.36%) | 40.31%<br>(39.66% - 41.06%) | 36.18%<br>(35.66% - 36.75%) | 31.25%<br>(30.67% - 31.84%) | 20.73%<br>(19.91% - 21.62%) | 21.40%<br>(20.60% - 22.27%) | 17.13%<br>(16.56% - 17.67%) | 13.61%<br>(12.97% - 14.30%) | 7.86%<br>(6.80% - 9.19%)   | 8.73%<br>(7.71% - 9.92%)   | 5.81%<br>(5.22% - 6.46%)  | 4.19%<br>(3.58% - 4.89%) |
| Benin                              | 38.41%<br>(37.32% - 39.60%) | 38.75%<br>(37.47% - 40.20%) | 38.44%<br>(37.17% - 39.86%) | 33.15%<br>(31.79% - 34.57%) | 19.84%<br>(18.15% - 21.51%) | 19.19%<br>(17.69% - 20.89%) | 19.06%<br>(17.69% - 20.43%) | 13.95%<br>(12.45% - 15.47%) | 7.41%<br>(5.88% - 9.18%)   | 6.62%<br>(5.06% - 8.35%)   | 6.55%<br>(5.27% - 7.94%)  | 3.72%<br>(2.68% - 4.89%) |
| Burkina Faso                       | 40.88%<br>(39.29% - 42.77%) | 42.57%<br>(41.42% - 43.97%) | 35.35%<br>(34.38% - 36.28%) | 30.35%<br>(29.14% - 31.54%) | 19.88%<br>(17.99% - 21.72%) | 24.14%<br>(22.73% - 25.65%) | 16.95%<br>(15.81% - 18.22%) | 12.51%<br>(11.01% - 13.91%) | 6.51%<br>(4.75% - 8.57%)   | 10.36%<br>(8.62% - 12.33%) | 5.70%<br>(4.73% - 6.83%)  | 3.34%<br>(2.40% - 4.33%) |
| Cameroon                           | 37.85%<br>(36.03% - 39.73%) | 39.62%<br>(38.13% - 41.37%) | 34.25%<br>(33.08% - 35.67%) | 29.09%<br>(27.78% - 30.50%) | 17.25%<br>(15.65% - 18.79%) | 19.87%<br>(18.35% - 21.39%) | 15.23%<br>(13.88% - 16.62%) | 11.91%<br>(10.45% - 13.39%) | 5.08%<br>(3.74% - 6.56%)   | 6.95%<br>(5.46% - 8.65%)   | 4.47%<br>(3.35% - 5.70%)  | 3.16%<br>(2.29% - 4.19%) |
| Cabo Verde                         | 24.64%<br>(23.39% - 25.86%) | 20.86%<br>(19.61% - 22.31%) | 15.50%<br>(14.40% - 16.71%) | 12.98%<br>(11.88% - 14.16%) | 9.89%<br>(8.63% - 11.18%)   | 7.69%<br>(6.62% - 9.01%)    | 5.02%<br>(4.20% - 5.86%)    | 3.99%<br>(3.30% - 4.81%)    | 2.60%<br>(1.92% - 3.40%)   | 1.78%<br>(1.28% - 2.48%)   | 0.93%<br>(0.62% - 1.30%)  | 0.66%<br>(0.42% - 0.99%) |
| Chad                               | 39.70%<br>(38.41% - 41.21%) | 40.46%<br>(39.34% - 41.82%) | 39.06%<br>(37.93% - 40.37%) | 36.35%<br>(35.17% - 37.76%) | 21.75%<br>(19.75% - 23.91%) | 23.16%<br>(21.51% - 24.85%) | 22.04%<br>(20.49% - 23.72%) | 19.21%<br>(17.52% - 21.00%) | 9.01%<br>(6.63% - 11.58%)  | 10.27%<br>(8.22% - 12.67%) | 9.58%<br>(7.74% - 11.66%) | 7.57%<br>(5.71% - 9.66%) |
| Côte d'Ivoire                      | 28.63%<br>(27.47% - 29.86%) | 32.60%<br>(31.50% - 33.81%) | 30.85%<br>(29.73% - 32.04%) | 23.80%<br>(22.50% - 25.05%) | 11.30%<br>(10.02% - 12.48%) | 14.26%<br>(12.97% - 15.62%) | 12.68%<br>(11.41% - 13.97%) | 7.93%<br>(6.67% - 9.24%)    | 2.85%<br>(2.15% - 3.60%)   | 4.14%<br>(3.14% - 5.27%)   | 3.36%<br>(2.54% - 4.25%)  | 1.53%<br>(1.00% - 2.17%) |
| Gambia                             | 30.30%<br>(28.89% - 31.93%) | 28.10%<br>(27.07% - 29.29%) | 24.63%<br>(23.62% - 25.67%) | 20.77%<br>(19.55% - 21.97%) | 9.78%<br>(8.29% - 11.27%)   | 9.33%<br>(8.13% - 10.60%)   | 8.34%<br>(7.35% - 9.32%)    | 6.12%<br>(5.10% - 7.13%)    | 1.73%<br>(1.10% - 2.46%)   | 1.75%<br>(1.16% - 2.40%)   | 1.67%<br>(1.19% - 2.16%)  | 0.97%<br>(0.58% - 1.44%) |
| Ghana                              | 35.32%<br>(34.17% - 36.60%) | 32.37%<br>(31.22% - 33.58%) | 26.22%<br>(25.18% - 27.29%) | 19.36%<br>(18.15% - 20.59%) | 15.61%<br>(14.34% - 16.90%) | 12.89%<br>(11.67% - 14.18%) | 8.72%<br>(7.63% - 9.72%)    | 5.50%<br>(4.56% - 6.51%)    | 4.51%<br>(3.50% - 5.67%)   | 3.17%<br>(2.36% - 4.17%)   | 1.65%<br>(1.16% - 2.16%)  | 0.78%<br>(0.47% - 1.19%) |
| Guinea                             | 36.81%<br>(35.54% - 38.29%) | 37.60%<br>(36.42% - 38.85%) | 35.40%<br>(34.10% - 36.89%) | 31.18%<br>(29.82% - 32.61%) | 16.95%<br>(15.29% - 18.82%) | 17.41%<br>(15.94% - 18.92%) | 15.42%<br>(14.14% - 16.68%) | 12.70%<br>(11.23% - 14.13%) | 5.22%<br>(3.94% - 6.84%)   | 5.38%<br>(4.22% - 6.66%)   | 4.32%<br>(3.38% - 5.39%)  | 3.29%<br>(2.37% - 4.27%) |
| Guinea-Bissau                      | 37.59%<br>(36.06% - 39.31%) | 36.86%<br>(35.62% - 38.25%) | 33.27%<br>(32.30% - 34.27%) | 28.59%<br>(27.28% - 29.92%) | 16.32%<br>(14.60% - 18.16%) | 16.74%<br>(15.20% - 18.38%) | 13.84%<br>(12.56% - 15.04%) | 10.37%<br>(8.97% - 11.76%)  | 4.56%<br>(3.36% - 5.99%)   | 5.12%<br>(4.00% - 6.45%)   | 3.71%<br>(2.93% - 4.53%)  | 2.26%<br>(1.52% - 3.06%) |
| Liberia                            | 45.93%<br>(43.83% - 48.34%) | 45.62%<br>(43.66% - 47.83%) | 36.07%<br>(34.25% - 38.17%) | 29.65%<br>(28.10% - 31.42%) | 23.46%<br>(21.09% - 26.12%) | 24.19%<br>(22.07% - 26.45%) | 15.00%<br>(13.61% - 16.46%) | 11.00%<br>(9.30% - 12.71%)  | 7.93%<br>(5.95% - 10.36%)  | 8.82%<br>(6.89% - 10.94%)  | 3.79%<br>(2.87% - 4.86%)  | 2.43%<br>(1.58% - 3.50%) |
| Mali                               | 36.27%<br>(35.21% - 37.28%) | 35.78%<br>(34.85% - 36.79%) | 29.96%<br>(29.02% - 30.95%) | 26.64%<br>(25.46% - 27.87%) | 19.87%<br>(18.35% - 21.36%) | 19.24%<br>(18.02% - 20.63%) | 12.58%<br>(11.52% - 13.62%) | 9.94%<br>(8.71% - 11.23%)   | 8.42%<br>(6.89% - 9.97%)   | 7.93%<br>(6.63% - 9.36%)   | 3.47%<br>(2.71% - 4.24%)  | 2.28%<br>(1.61% - 3.04%) |
| Mauritania                         | 41.52%<br>(40.32% - 42.80%) | 34.43%<br>(33.42% - 35.46%) | 25.56%<br>(24.70% - 26.44%) | 20.58%<br>(19.40% - 21.79%) | 23.39%<br>(21.75% - 25.11%) | 17.31%<br>(15.96% - 18.77%) | 9.86%<br>(9.01% - 10.80%)   | 6.85%<br>(5.93% - 7.88%)    | 10.12%<br>(8.22% - 12.21%) | 6.43%<br>(5.24% - 7.80%)   | 2.48%<br>(2.03% - 3.00%)  | 1.37%<br>(0.97% - 1.86%) |
| Niger                              | 48.83%<br>(46.80% - 51.03%) | 49.77%<br>(47.63% - 52.26%) | 46.76%<br>(44.45% - 49.32%) | 43.17%<br>(40.64% - 45.93%) | 27.93%<br>(25.83% - 30.05%) | 28.63%<br>(26.77% - 30.47%) | 22.77%<br>(21.38% - 24.24%) | 18.67%<br>(17.07% - 20.56%) | 11.31%<br>(8.79% - 14.27%) | 11.84%<br>(9.47% - 14.55%) | 7.14%<br>(5.92% - 8.54%)  | 4.80%<br>(3.77% - 6.11%) |



Table S8a. Estimated overall, severe, and extreme **stunting** prevalence (%) in children under 5 years, both sexes, in 1990, 2000, 2010, and 2020.

| Location              | Total                       |                             |                             |                             | Severe                      |                             |                             |                             | Extreme                     |                             |                           |                           |
|-----------------------|-----------------------------|-----------------------------|-----------------------------|-----------------------------|-----------------------------|-----------------------------|-----------------------------|-----------------------------|-----------------------------|-----------------------------|---------------------------|---------------------------|
|                       | 1990                        | 2000                        | 2010                        | 2020                        | 1990                        | 2000                        | 2010                        | 2020                        | 1990                        | 2000                        | 2010                      | 2020                      |
| Nigeria               | 44.63%<br>(43.02% - 46.42%) | 43.43%<br>(42.09% - 44.98%) | 38.97%<br>(37.96% - 40.07%) | 33.73%<br>(32.60% - 34.87%) | 24.15%<br>(22.48% - 26.09%) | 24.51%<br>(22.85% - 26.24%) | 19.55%<br>(18.43% - 20.62%) | 15.97%<br>(14.67% - 17.33%) | 10.05%<br>( 7.76% - 12.87%) | 11.03%<br>( 8.94% - 13.55%) | 7.23%<br>( 6.02% - 8.55%) | 5.59%<br>( 4.33% - 7.08%) |
| Sao Tome and Principe | 33.89%<br>(32.66% - 35.15%) | 33.20%<br>(32.13% - 34.32%) | 26.94%<br>(26.02% - 27.94%) | 20.07%<br>(18.91% - 21.23%) | 13.77%<br>(12.32% - 15.33%) | 13.37%<br>(12.10% - 14.53%) | 9.56%<br>( 8.71% - 10.48%)  | 6.17%<br>( 5.28% - 7.09%)   | 3.59%<br>( 2.77% - 4.52%)   | 3.45%<br>( 2.72% - 4.21%)   | 2.09%<br>( 1.69% - 2.55%) | 1.06%<br>( 0.72% - 1.47%) |
| Senegal               | 32.54%<br>(31.21% - 34.00%) | 28.44%<br>(27.34% - 29.66%) | 23.07%<br>(22.33% - 23.89%) | 18.20%<br>(17.23% - 19.19%) | 13.04%<br>(11.77% - 14.33%) | 10.39%<br>( 9.29% - 11.51%) | 7.20%<br>( 6.40% - 8.01%)   | 4.83%<br>( 4.01% - 5.70%)   | 3.25%<br>( 2.31% - 4.32%)   | 2.28%<br>( 1.63% - 2.99%)   | 1.24%<br>( 0.86% - 1.65%) | 0.62%<br>( 0.33% - 0.97%) |
| Sierra Leone          | 40.76%<br>(39.74% - 41.80%) | 39.98%<br>(38.75% - 41.32%) | 38.48%<br>(37.35% - 39.78%) | 31.14%<br>(29.92% - 32.42%) | 20.49%<br>(18.53% - 22.55%) | 20.91%<br>(19.32% - 22.67%) | 18.98%<br>(17.62% - 20.31%) | 13.10%<br>(11.68% - 14.64%) | 7.22%<br>( 5.65% - 9.06%)   | 7.87%<br>( 6.29% - 9.82%)   | 6.50%<br>( 5.25% - 7.88%) | 3.63%<br>( 2.70% - 4.70%) |

Table S8b. Estimated overall, severe, and extreme **wasting prevalence (%)** in children under 5 years, both sexes, in 1990, 2000, 2010, and 2020.

| Location                                                | Total             |                   |                  |                 | Severe          |                 |                 |                 | Extreme         |                 |                 |                 |
|---------------------------------------------------------|-------------------|-------------------|------------------|-----------------|-----------------|-----------------|-----------------|-----------------|-----------------|-----------------|-----------------|-----------------|
|                                                         | 1990              | 2000              | 2010             | 2020            | 1990            | 2000            | 2010            | 2020            | 1990            | 2000            | 2010            | 2020            |
| <b>Global</b>                                           | 11.23%            | 10.97%            | 9.96%            | 7.41%           | 3.38%           | 3.30%           | 2.90%           | 1.66%           | 0.78%           | 0.72%           | 0.60%           | 0.20%           |
|                                                         | (11.14% - 11.33%) | (10.90% - 11.03%) | (9.91% - 10.01%) | (7.35% - 7.46%) | (3.34% - 3.42%) | (3.26% - 3.34%) | (2.87% - 2.93%) | (1.64% - 1.69%) | (0.76% - 0.80%) | (0.70% - 0.74%) | (0.58% - 0.61%) | (0.19% - 0.21%) |
| <b>Central Europe, Eastern Europe, and Central Asia</b> | 5.51%             | 5.62%             | 4.30%            | 3.26%           | 0.90%           | 0.94%           | 0.53%           | 0.27%           | 0.06%           | 0.06%           | 0.02%           | 0.01%           |
|                                                         | (5.36% - 5.68%)   | (5.49% - 5.76%)   | (4.17% - 4.43%)  | (3.15% - 3.39%) | (0.85% - 0.97%) | (0.89% - 1.00%) | (0.49% - 0.57%) | (0.24% - 0.30%) | (0.05% - 0.08%) | (0.05% - 0.07%) | (0.02% - 0.03%) | (0.00% - 0.01%) |
| <b>Central Asia</b>                                     | 6.86%             | 7.07%             | 5.03%            | 3.46%           | 1.41%           | 1.42%           | 0.68%           | 0.27%           | 0.11%           | 0.10%           | 0.02%           | 0.00%           |
|                                                         | (6.63% - 7.12%)   | (6.84% - 7.32%)   | (4.86% - 5.22%)  | (3.32% - 3.61%) | (1.30% - 1.52%) | (1.33% - 1.53%) | (0.63% - 0.75%) | (0.24% - 0.30%) | (0.08% - 0.14%) | (0.07% - 0.12%) | (0.02% - 0.03%) | (0.00% - 0.01%) |
| Armenia                                                 | 2.81%             | 3.44%             | 3.48%            | 3.30%           | 0.16%           | 0.22%           | 0.14%           | 0.14%           | 0.00%           | 0.00%           | 0.00%           | 0.00%           |
|                                                         | (2.60% - 3.00%)   | (3.21% - 3.69%)   | (3.17% - 3.81%)  | (3.00% - 3.65%) | (0.12% - 0.20%) | (0.18% - 0.27%) | (0.10% - 0.20%) | (0.07% - 0.22%) | (0.00% - 0.00%) | (0.00% - 0.00%) | (0.00% - 0.00%) | (0.00% - 0.00%) |
| Azerbaijan                                              | 7.84%             | 8.53%             | 6.17%            | 4.89%           | 1.56%           | 1.85%           | 1.00%           | 0.58%           | 0.07%           | 0.08%           | 0.00%           | 0.00%           |
|                                                         | (7.36% - 8.33%)   | (8.09% - 9.02%)   | (5.83% - 6.54%)  | (4.53% - 5.27%) | (1.36% - 1.78%) | (1.65% - 2.05%) | (0.87% - 1.15%) | (0.46% - 0.72%) | (0.04% - 0.11%) | (0.05% - 0.11%) | (0.00% - 0.00%) | (0.00% - 0.00%) |
| Georgia                                                 | 2.31%             | 2.20%             | 1.64%            | 0.89%           | 0.01%           | 0.01%           | 0.01%           | 0.00%           | 0.00%           | 0.00%           | 0.00%           | 0.00%           |
|                                                         | (2.09% - 2.53%)   | (2.01% - 2.40%)   | (1.51% - 1.79%)  | (0.75% - 0.98%) | (0.00% - 0.03%) | (0.00% - 0.02%) | (0.00% - 0.02%) | (0.00% - 0.01%) | (0.00% - 0.00%) | (0.00% - 0.00%) | (0.00% - 0.00%) | (0.00% - 0.00%) |
| Kazakhstan                                              | 3.68%             | 4.09%             | 4.04%            | 2.70%           | 0.39%           | 0.43%           | 0.37%           | 0.13%           | 0.02%           | 0.03%           | 0.01%           | 0.00%           |
|                                                         | (3.42% - 3.96%)   | (3.76% - 4.39%)   | (3.74% - 4.35%)  | (2.51% - 2.90%) | (0.32% - 0.45%) | (0.36% - 0.52%) | (0.30% - 0.44%) | (0.10% - 0.16%) | (0.01% - 0.04%) | (0.01% - 0.05%) | (0.00% - 0.03%) | (0.00% - 0.00%) |
| Kyrgyzstan                                              | 4.69%             | 4.71%             | 3.14%            | 2.39%           | 0.43%           | 0.44%           | 0.11%           | 0.03%           | 0.00%           | 0.00%           | 0.00%           | 0.00%           |
|                                                         | (4.31% - 5.09%)   | (4.34% - 5.08%)   | (2.89% - 3.41%)  | (2.20% - 2.61%) | (0.32% - 0.56%) | (0.33% - 0.56%) | (0.08% - 0.16%) | (0.02% - 0.05%) | (0.00% - 0.00%) | (0.00% - 0.00%) | (0.00% - 0.00%) | (0.00% - 0.00%) |
| Mongolia                                                | 3.92%             | 3.98%             | 1.94%            | 1.19%           | 0.28%           | 0.33%           | 0.04%           | 0.00%           | 0.00%           | 0.01%           | 0.00%           | 0.00%           |
|                                                         | (3.69% - 4.18%)   | (3.76% - 4.21%)   | (1.82% - 2.08%)  | (1.10% - 1.30%) | (0.24% - 0.34%) | (0.28% - 0.38%) | (0.02% - 0.05%) | (0.00% - 0.01%) | (0.00% - 0.01%) | (0.00% - 0.02%) | (0.00% - 0.00%) | (0.00% - 0.00%) |
| Tajikistan                                              | 9.78%             | 11.09%            | 9.11%            | 6.76%           | 2.24%           | 2.86%           | 2.06%           | 1.13%           | 0.04%           | 0.17%           | 0.12%           | 0.02%           |
|                                                         | (9.24% - 10.31%)  | (10.59% - 11.62%) | (8.68% - 9.57%)  | (6.39% - 7.15%) | (1.98% - 2.49%) | (2.61% - 3.14%) | (1.87% - 2.27%) | (0.98% - 1.29%) | (0.01% - 0.09%) | (0.10% - 0.26%) | (0.09% - 0.16%) | (0.01% - 0.05%) |
| Turkmenistan                                            | 8.71%             | 7.82%             | 5.99%            | 4.37%           | 1.71%           | 1.38%           | 0.82%           | 0.35%           | 0.03%           | 0.01%           | 0.01%           | 0.00%           |
|                                                         | (8.13% - 9.32%)   | (7.36% - 8.26%)   | (5.65% - 6.35%)  | (4.01% - 4.73%) | (1.47% - 1.98%) | (1.20% - 1.57%) | (0.70% - 0.95%) | (0.28% - 0.44%) | (0.01% - 0.06%) | (0.00% - 0.01%) | (0.00% - 0.01%) | (0.00% - 0.00%) |
| Uzbekistan                                              | 9.03%             | 7.76%             | 4.87%            | 3.10%           | 2.29%           | 1.70%           | 0.59%           | 0.12%           | 0.26%           | 0.15%           | 0.02%           | 0.00%           |
|                                                         | (8.45% - 9.69%)   | (7.29% - 8.28%)   | (4.49% - 5.27%)  | (2.82% - 3.41%) | (2.02% - 2.61%) | (1.50% - 1.94%) | (0.49% - 0.72%) | (0.08% - 0.17%) | (0.18% - 0.34%) | (0.10% - 0.20%) | (0.00% - 0.04%) | (0.00% - 0.00%) |
| <b>Central Europe</b>                                   | 3.50%             | 3.44%             | 2.77%            | 2.25%           | 0.30%           | 0.29%           | 0.13%           | 0.05%           | 0.02%           | 0.02%           | 0.00%           | 0.00%           |
|                                                         | (3.36% - 3.65%)   | (3.30% - 3.57%)   | (2.66% - 2.88%)  | (2.16% - 2.35%) | (0.27% - 0.33%) | (0.27% - 0.32%) | (0.12% - 0.14%) | (0.04% - 0.06%) | (0.02% - 0.04%) | (0.01% - 0.03%) | (0.00% - 0.00%) | (0.00% - 0.00%) |
| Albania                                                 | 12.70%            | 11.23%            | 7.16%            | 3.85%           | 4.05%           | 3.34%           | 1.45%           | 0.28%           | 0.66%           | 0.42%           | 0.02%           | 0.00%           |
|                                                         | (11.91% - 13.48%) | (10.62% - 11.84%) | (6.71% - 7.65%)  | (3.49% - 4.19%) | (3.57% - 4.54%) | (3.00% - 3.71%) | (1.24% - 1.67%) | (0.17% - 0.40%) | (0.46% - 0.88%) | (0.29% - 0.58%) | (0.00% - 0.03%) | (0.00% - 0.00%) |
| Bosnia and Herzegovina                                  | 3.19%             | 3.93%             | 2.71%            | 2.39%           | 0.33%           | 0.41%           | 0.14%           | 0.09%           | 0.01%           | 0.03%           | 0.00%           | 0.00%           |
|                                                         | (2.96% - 3.44%)   | (3.55% - 4.33%)   | (2.50% - 2.94%)  | (2.18% - 2.61%) | (0.27% - 0.40%) | (0.33% - 0.49%) | (0.11% - 0.17%) | (0.06% - 0.12%) | (0.00% - 0.03%) | (0.01% - 0.05%) | (0.00% - 0.00%) | (0.00% - 0.00%) |
| Bulgaria                                                | 2.93%             | 3.31%             | 2.92%            | 2.48%           | 0.27%           | 0.36%           | 0.25%           | 0.15%           | 0.00%           | 0.00%           | 0.00%           | 0.00%           |
|                                                         | (2.69% - 3.19%)   | (3.06% - 3.58%)   | (2.68% - 3.17%)  | (2.27% - 2.72%) | (0.20% - 0.34%) | (0.28% - 0.44%) | (0.19% - 0.33%) | (0.10% - 0.21%) | (0.00% - 0.00%) | (0.00% - 0.00%) | (0.00% - 0.00%) | (0.00% - 0.00%) |
| Croatia                                                 | 2.72%             | 3.21%             | 2.74%            | 2.28%           | 0.07%           | 0.12%           | 0.07%           | 0.03%           | 0.00%           | 0.00%           | 0.00%           | 0.00%           |
|                                                         | (2.46% - 3.02%)   | (2.85% - 3.63%)   | (2.46% - 3.05%)  | (2.05% - 2.53%) | (0.04% - 0.10%) | (0.08% - 0.19%) | (0.04% - 0.10%) | (0.01% - 0.05%) | (0.00% - 0.00%) | (0.00% - 0.00%) | (0.00% - 0.00%) | (0.00% - 0.00%) |
| Czechia                                                 | 3.23%             | 3.11%             | 2.81%            | 2.59%           | 0.08%           | 0.19%           | 0.14%           | 0.09%           | 0.00%           | 0.00%           | 0.00%           | 0.00%           |
|                                                         | (2.92% - 3.56%)   | (2.84% - 3.40%)   | (2.57% - 3.12%)  | (2.34% - 2.88%) | (0.04% - 0.15%) | (0.15% - 0.26%) | (0.11% - 0.20%) | (0.06% - 0.13%) | (0.00% - 0.00%) | (0.00% - 0.00%) | (0.00% - 0.00%) | (0.00% - 0.00%) |
| Hungary                                                 | 2.10%             | 1.79%             | 1.69%            | 1.54%           | 0.11%           | 0.06%           | 0.03%           | 0.02%           | 0.00%           | 0.00%           | 0.00%           | 0.00%           |
|                                                         | (1.92% - 2.29%)   | (1.63% - 1.97%)   | (1.53% - 1.88%)  | (1.39% - 1.71%) | (0.08% - 0.14%) | (0.03% - 0.08%) | (0.01% - 0.05%) | (0.01% - 0.04%) | (0.00% - 0.00%) | (0.00% - 0.00%) | (0.00% - 0.00%) | (0.00% - 0.00%) |
| North Macedonia                                         | 3.97%             | 3.66%             | 3.55%            | 2.93%           | 0.35%           | 0.30%           | 0.24%           | 0.14%           | 0.00%           | 0.00%           | 0.00%           | 0.00%           |
|                                                         | (3.67% - 4.30%)   | (3.39% - 3.95%)   | (3.29% - 3.85%)  | (2.70% - 3.18%) | (0.28% - 0.42%) | (0.24% - 0.36%) | (0.18% - 0.30%) | (0.10% - 0.19%) | (0.00% - 0.02%) | (0.00% - 0.01%) | (0.00% - 0.00%) | (0.00% - 0.00%) |
| Montenegro                                              | 2.29%             | 3.21%             | 3.12%            | 2.42%           | 0.01%           | 0.09%           | 0.12%           | 0.07%           | 0.00%           | 0.00%           | 0.00%           | 0.00%           |
|                                                         | (2.06% - 2.56%)   | (2.89% - 3.55%)   | (2.85% - 3.41%)  | (2.21% - 2.64%) | (0.00% - 0.02%) | (0.05% - 0.16%) | (0.08% - 0.19%) | (0.05% - 0.10%) | (0.00% - 0.00%) | (0.00% - 0.00%) | (0.00% - 0.00%) | (0.00% - 0.00%) |
| Poland                                                  | 2.94%             | 2.90%             | 2.58%            | 2.02%           | 0.10%           | 0.10%           | 0.06%           | 0.02%           | 0.00%           | 0.00%           | 0.00%           | 0.00%           |
|                                                         | (2.61% - 3.30%)   | (2.58% - 3.24%)   | (2.31% - 2.86%)  | (1.80% - 2.25%) | (0.07% - 0.14%) | (0.06% - 0.14%) | (0.04% - 0.09%) | (0.01% - 0.04%) | (0.00% - 0.00%) | (0.00% - 0.00%) | (0.00% - 0.00%) | (0.00% - 0.00%) |
| Romania                                                 | 3.57%             | 3.16%             | 2.39%            | 2.07%           | 0.12%           | 0.11%           | 0.04%           | 0.02%           | 0.00%           | 0.00%           | 0.00%           | 0.00%           |
|                                                         | (3.22% - 3.95%)   | (2.91% - 3.47%)   | (2.18% - 2.60%)  | (1.88% - 2.29%) | (0.07% - 0.19%) | (0.09% - 0.15%) | (0.03% - 0.06%) | (0.01% - 0.03%) | (0.00% - 0.00%) | (0.00% - 0.00%) | (0.00% - 0.00%) | (0.00% - 0.00%) |

Table S8b. Estimated overall, severe, and extreme wasting prevalence (%) in children under 5 years, both sexes, in 1990, 2000, 2010, and 2020.

| Location                 | Total           |                 |                 |                 | Severe          |                 |                 |                 | Extreme         |                 |                 |                 |
|--------------------------|-----------------|-----------------|-----------------|-----------------|-----------------|-----------------|-----------------|-----------------|-----------------|-----------------|-----------------|-----------------|
|                          | 1990            | 2000            | 2010            | 2020            | 1990            | 2000            | 2010            | 2020            | 1990            | 2000            | 2010            | 2020            |
| Serbia                   | 3.37%           | 3.73%           | 3.44%           | 2.94%           | 0.08%           | 0.17%           | 0.16%           | 0.10%           | 0.00%           | 0.00%           | 0.00%           | 0.00%           |
|                          | (3.06% - 3.73%) | (3.37% - 4.10%) | (3.14% - 3.79%) | (2.69% - 3.25%) | (0.05% - 0.14%) | (0.12% - 0.25%) | (0.13% - 0.22%) | (0.07% - 0.13%) | (0.00% - 0.00%) | (0.00% - 0.00%) | (0.00% - 0.00%) | (0.00% - 0.00%) |
| Slovakia                 | 2.88%           | 3.24%           | 3.06%           | 2.44%           | 0.09%           | 0.13%           | 0.10%           | 0.04%           | 0.00%           | 0.00%           | 0.00%           | 0.00%           |
|                          | (2.60% - 3.18%) | (2.87% - 3.66%) | (2.73% - 3.46%) | (2.20% - 2.72%) | (0.05% - 0.12%) | (0.08% - 0.19%) | (0.06% - 0.15%) | (0.02% - 0.07%) | (0.00% - 0.00%) | (0.00% - 0.00%) | (0.00% - 0.00%) | (0.00% - 0.00%) |
| Slovenia                 | 2.35%           | 2.64%           | 2.33%           | 1.94%           | 0.04%           | 0.06%           | 0.04%           | 0.01%           | 0.00%           | 0.00%           | 0.00%           | 0.00%           |
|                          | (2.12% - 2.64%) | (2.37% - 2.96%) | (2.10% - 2.59%) | (1.73% - 2.18%) | (0.02% - 0.07%) | (0.04% - 0.10%) | (0.02% - 0.06%) | (0.00% - 0.03%) | (0.00% - 0.00%) | (0.00% - 0.00%) | (0.00% - 0.00%) | (0.00% - 0.00%) |
| Eastern Europe           | 5.81%           | 5.82%           | 4.52%           | 3.59%           | 0.94%           | 0.97%           | 0.62%           | 0.38%           | 0.05%           | 0.06%           | 0.04%           | 0.02%           |
|                          | (5.52% - 6.11%) | (5.56% - 6.09%) | (4.28% - 4.79%) | (3.35% - 3.84%) | (0.84% - 1.06%) | (0.88% - 1.07%) | (0.54% - 0.70%) | (0.32% - 0.44%) | (0.03% - 0.07%) | (0.04% - 0.07%) | (0.02% - 0.05%) | (0.01% - 0.03%) |
| Belarus                  | 2.18%           | 2.09%           | 1.72%           | 1.38%           | 0.05%           | 0.06%           | 0.04%           | 0.01%           | 0.00%           | 0.00%           | 0.00%           | 0.00%           |
|                          | (1.93% - 2.45%) | (1.87% - 2.31%) | (1.54% - 1.91%) | (1.23% - 1.57%) | (0.03% - 0.08%) | (0.04% - 0.08%) | (0.02% - 0.06%) | (0.00% - 0.03%) | (0.00% - 0.00%) | (0.00% - 0.00%) | (0.00% - 0.00%) | (0.00% - 0.00%) |
| Estonia                  | 4.41%           | 3.53%           | 1.92%           | 1.64%           | 0.34%           | 0.16%           | 0.01%           | 0.00%           | 0.00%           | 0.00%           | 0.00%           | 0.00%           |
|                          | (3.93% - 4.91%) | (3.07% - 3.97%) | (1.71% - 2.16%) | (1.46% - 1.86%) | (0.22% - 0.50%) | (0.09% - 0.25%) | (0.00% - 0.02%) | (0.00% - 0.01%) | (0.00% - 0.00%) | (0.00% - 0.00%) | (0.00% - 0.00%) | (0.00% - 0.00%) |
| Latvia                   | 4.36%           | 4.01%           | 2.36%           | 1.88%           | 0.33%           | 0.25%           | 0.02%           | 0.01%           | 0.00%           | 0.00%           | 0.00%           | 0.00%           |
|                          | (3.87% - 4.85%) | (3.54% - 4.45%) | (2.08% - 2.69%) | (1.67% - 2.12%) | (0.21% - 0.49%) | (0.15% - 0.37%) | (0.01% - 0.04%) | (0.00% - 0.02%) | (0.00% - 0.00%) | (0.00% - 0.00%) | (0.00% - 0.00%) | (0.00% - 0.00%) |
| Lithuania                | 3.98%           | 3.29%           | 2.06%           | 1.66%           | 0.25%           | 0.12%           | 0.01%           | 0.00%           | 0.00%           | 0.00%           | 0.00%           | 0.00%           |
|                          | (3.51% - 4.44%) | (2.88% - 3.73%) | (1.83% - 2.31%) | (1.47% - 1.88%) | (0.16% - 0.38%) | (0.06% - 0.20%) | (0.00% - 0.03%) | (0.00% - 0.01%) | (0.00% - 0.00%) | (0.00% - 0.00%) | (0.00% - 0.00%) | (0.00% - 0.00%) |
| Republic of Moldova      | 4.56%           | 4.53%           | 3.08%           | 2.13%           | 0.38%           | 0.38%           | 0.07%           | 0.01%           | 0.00%           | 0.00%           | 0.00%           | 0.00%           |
|                          | (4.15% - 5.02%) | (4.12% - 4.96%) | (2.79% - 3.40%) | (1.92% - 2.38%) | (0.26% - 0.53%) | (0.25% - 0.52%) | (0.04% - 0.12%) | (0.00% - 0.03%) | (0.00% - 0.00%) | (0.00% - 0.00%) | (0.00% - 0.00%) | (0.00% - 0.00%) |
| Russian Federation       | 5.20%           | 5.18%           | 3.68%           | 2.92%           | 0.61%           | 0.62%           | 0.25%           | 0.11%           | 0.00%           | 0.00%           | 0.00%           | 0.00%           |
|                          | (4.81% - 5.59%) | (4.85% - 5.53%) | (3.39% - 3.98%) | (2.67% - 3.23%) | (0.50% - 0.73%) | (0.52% - 0.74%) | (0.19% - 0.31%) | (0.07% - 0.16%) | (0.00% - 0.00%) | (0.00% - 0.00%) | (0.00% - 0.00%) | (0.00% - 0.00%) |
| Ukraine                  | 8.89%           | 9.10%           | 8.43%           | 7.71%           | 2.33%           | 2.41%           | 2.12%           | 1.80%           | 0.23%           | 0.25%           | 0.18%           | 0.11%           |
|                          | (8.24% - 9.62%) | (8.56% - 9.65%) | (7.83% - 9.12%) | (7.06% - 8.43%) | (2.02% - 2.68%) | (2.14% - 2.69%) | (1.85% - 2.45%) | (1.51% - 2.14%) | (0.15% - 0.33%) | (0.18% - 0.33%) | (0.11% - 0.26%) | (0.06% - 0.17%) |
| High-income              | 1.41%           | 1.15%           | 0.98%           | 0.90%           | 0.03%           | 0.01%           | 0.01%           | 0.01%           | 0.00%           | 0.00%           | 0.00%           | 0.00%           |
|                          | (1.37% - 1.44%) | (1.11% - 1.18%) | (0.96% - 1.01%) | (0.87% - 0.93%) | (0.02% - 0.03%) | (0.01% - 0.01%) | (0.01% - 0.01%) | (0.01% - 0.01%) | (0.00% - 0.00%) | (0.00% - 0.00%) | (0.00% - 0.00%) | (0.00% - 0.00%) |
| Australasia              | 0.98%           | 0.86%           | 0.74%           | 0.66%           | 0.00%           | 0.00%           | 0.00%           | 0.00%           | 0.00%           | 0.00%           | 0.00%           | 0.00%           |
|                          | (0.90% - 1.08%) | (0.79% - 0.95%) | (0.67% - 0.82%) | (0.59% - 0.74%) | (0.00% - 0.00%) | (0.00% - 0.00%) | (0.00% - 0.00%) | (0.00% - 0.00%) | (0.00% - 0.00%) | (0.00% - 0.00%) | (0.00% - 0.00%) | (0.00% - 0.00%) |
| Australia                | 0.97%           | 0.86%           | 0.73%           | 0.66%           | 0.00%           | 0.00%           | 0.00%           | 0.00%           | 0.00%           | 0.00%           | 0.00%           | 0.00%           |
|                          | (0.87% - 1.08%) | (0.77% - 0.95%) | (0.65% - 0.82%) | (0.57% - 0.74%) | (0.00% - 0.00%) | (0.00% - 0.00%) | (0.00% - 0.00%) | (0.00% - 0.00%) | (0.00% - 0.00%) | (0.00% - 0.00%) | (0.00% - 0.00%) | (0.00% - 0.00%) |
| New Zealand              | 1.06%           | 0.90%           | 0.78%           | 0.67%           | 0.00%           | 0.00%           | 0.00%           | 0.00%           | 0.00%           | 0.00%           | 0.00%           | 0.00%           |
|                          | (0.95% - 1.17%) | (0.80% - 1.00%) | (0.68% - 0.88%) | (0.54% - 0.76%) | (0.00% - 0.00%) | (0.00% - 0.00%) | (0.00% - 0.00%) | (0.00% - 0.00%) | (0.00% - 0.00%) | (0.00% - 0.00%) | (0.00% - 0.00%) | (0.00% - 0.00%) |
| High-income Asia Pacific | 2.65%           | 2.23%           | 2.13%           | 1.99%           | 0.07%           | 0.05%           | 0.05%           | 0.04%           | 0.00%           | 0.00%           | 0.00%           | 0.00%           |
|                          | (2.58% - 2.73%) | (2.17% - 2.28%) | (2.08% - 2.17%) | (1.95% - 2.04%) | (0.07% - 0.08%) | (0.05% - 0.06%) | (0.05% - 0.06%) | (0.04% - 0.04%) | (0.00% - 0.00%) | (0.00% - 0.00%) | (0.00% - 0.00%) | (0.00% - 0.00%) |
| Brunei Darussalam        | 3.72%           | 3.05%           | 2.66%           | 2.45%           | 0.24%           | 0.14%           | 0.09%           | 0.07%           | 0.00%           | 0.00%           | 0.00%           | 0.00%           |
|                          | (3.35% - 4.11%) | (2.75% - 3.38%) | (2.41% - 2.94%) | (2.20% - 2.71%) | (0.16% - 0.34%) | (0.08% - 0.20%) | (0.04% - 0.14%) | (0.02% - 0.12%) | (0.00% - 0.00%) | (0.00% - 0.00%) | (0.00% - 0.00%) | (0.00% - 0.00%) |
| Japan                    | 2.78%           | 2.57%           | 2.48%           | 2.31%           | 0.09%           | 0.08%           | 0.08%           | 0.06%           | 0.00%           | 0.00%           | 0.00%           | 0.00%           |
|                          | (2.73% - 2.84%) | (2.53% - 2.62%) | (2.44% - 2.52%) | (2.26% - 2.35%) | (0.08% - 0.10%) | (0.07% - 0.09%) | (0.07% - 0.08%) | (0.05% - 0.06%) | (0.00% - 0.00%) | (0.00% - 0.00%) | (0.00% - 0.00%) | (0.00% - 0.00%) |
| Hokkaidō                 | 2.69%           | 2.38%           | 2.30%           | 2.15%           | 0.08%           | 0.06%           | 0.05%           | 0.04%           | 0.00%           | 0.00%           | 0.00%           | 0.00%           |
|                          | (2.46% - 2.96%) | (2.16% - 2.60%) | (2.11% - 2.51%) | (1.96% - 2.35%) | (0.05% - 0.12%) | (0.03% - 0.09%) | (0.03% - 0.08%) | (0.02% - 0.06%) | (0.00% - 0.00%) | (0.00% - 0.00%) | (0.00% - 0.00%) | (0.00% - 0.00%) |
| Aomori                   | 2.66%           | 2.58%           | 2.43%           | 2.24%           | 0.03%           | 0.05%           | 0.04%           | 0.03%           | 0.00%           | 0.00%           | 0.00%           | 0.00%           |
|                          | (2.41% - 2.91%) | (2.35% - 2.82%) | (2.20% - 2.66%) | (2.04% - 2.46%) | (0.01% - 0.06%) | (0.02% - 0.08%) | (0.02% - 0.07%) | (0.01% - 0.06%) | (0.00% - 0.00%) | (0.00% - 0.00%) | (0.00% - 0.00%) | (0.00% - 0.00%) |
| Iwate                    | 2.52%           | 2.45%           | 2.38%           | 2.19%           | 0.02%           | 0.04%           | 0.04%           | 0.03%           | 0.00%           | 0.00%           | 0.00%           | 0.00%           |
|                          | (2.28% - 2.74%) | (2.23% - 2.66%) | (2.18% - 2.61%) | (1.98% - 2.40%) | (0.01% - 0.05%) | (0.02% - 0.07%) | (0.02% - 0.07%) | (0.01% - 0.05%) | (0.00% - 0.00%) | (0.00% - 0.00%) | (0.00% - 0.00%) | (0.00% - 0.00%) |
| Miyagi                   | 2.30%           | 2.32%           | 2.26%           | 2.10%           | 0.01%           | 0.03%           | 0.03%           | 0.02%           | 0.00%           | 0.00%           | 0.00%           | 0.00%           |
|                          | (2.10% - 2.54%) | (2.10% - 2.55%) | (2.06% - 2.48%) | (1.91% - 2.31%) | (0.00% - 0.04%) | (0.01% - 0.06%) | (0.01% - 0.06%) | (0.01% - 0.04%) | (0.00% - 0.00%) | (0.00% - 0.00%) | (0.00% - 0.00%) | (0.00% - 0.00%) |
| Akita                    | 2.47%           | 2.40%           | 2.36%           | 2.23%           | 0.03%           | 0.05%           | 0.05%           | 0.04%           | 0.00%           | 0.00%           | 0.00%           | 0.00%           |
|                          | (2.23% - 2.71%) | (2.19% - 2.61%) | (2.15% - 2.57%) | (2.04% - 2.44%) | (0.01% - 0.06%) | (0.03% - 0.08%) | (0.03% - 0.08%) | (0.02% - 0.07%) | (0.00% - 0.00%) | (0.00% - 0.00%) | (0.00% - 0.00%) | (0.00% - 0.00%) |

Table S8b. Estimated overall, severe, and extreme wasting prevalence (%) in children under 5 years, both sexes, in 1990, 2000, 2010, and 2020.

| Location  | Total           |                 |                 |                 | Severe          |                 |                 |                 | Extreme         |                 |                 |                 |
|-----------|-----------------|-----------------|-----------------|-----------------|-----------------|-----------------|-----------------|-----------------|-----------------|-----------------|-----------------|-----------------|
|           | 1990            | 2000            | 2010            | 2020            | 1990            | 2000            | 2010            | 2020            | 1990            | 2000            | 2010            | 2020            |
| Yamagata  | 2.32%           | 2.36%           | 2.29%           | 2.17%           | 0.01%           | 0.03%           | 0.03%           | 0.02%           | 0.00%           | 0.00%           | 0.00%           | 0.00%           |
|           | (2.10% - 2.56%) | (2.15% - 2.59%) | (2.10% - 2.52%) | (1.97% - 2.37%) | (0.00% - 0.03%) | (0.01% - 0.05%) | (0.01% - 0.05%) | (0.00% - 0.04%) | (0.00% - 0.00%) | (0.00% - 0.00%) | (0.00% - 0.00%) | (0.00% - 0.00%) |
| Fukushima | 2.76%           | 2.45%           | 2.30%           | 2.16%           | 0.08%           | 0.06%           | 0.06%           | 0.03%           | 0.00%           | 0.00%           | 0.00%           | 0.00%           |
|           | (2.50% - 3.01%) | (2.22% - 2.67%) | (2.09% - 2.53%) | (1.97% - 2.35%) | (0.05% - 0.12%) | (0.03% - 0.09%) | (0.02% - 0.07%) | (0.01% - 0.06%) | (0.00% - 0.00%) | (0.00% - 0.00%) | (0.00% - 0.00%) | (0.00% - 0.00%) |
| Ibaraki   | 1.98%           | 1.76%           | 1.65%           | 1.53%           | 0.03%           | 0.02%           | 0.01%           | 0.01%           | 0.00%           | 0.00%           | 0.00%           | 0.00%           |
|           | (1.80% - 2.16%) | (1.61% - 1.92%) | (1.51% - 1.81%) | (1.40% - 1.69%) | (0.01% - 0.06%) | (0.00% - 0.04%) | (0.00% - 0.03%) | (0.00% - 0.02%) | (0.00% - 0.00%) | (0.00% - 0.00%) | (0.00% - 0.00%) | (0.00% - 0.00%) |
| Tochigi   | 3.04%           | 2.77%           | 2.61%           | 2.42%           | 0.21%           | 0.16%           | 0.13%           | 0.11%           | 0.00%           | 0.00%           | 0.00%           | 0.00%           |
|           | (2.81% - 3.32%) | (2.56% - 3.00%) | (2.40% - 2.82%) | (2.23% - 2.63%) | (0.15% - 0.28%) | (0.10% - 0.22%) | (0.09% - 0.19%) | (0.06% - 0.15%) | (0.00% - 0.00%) | (0.00% - 0.00%) | (0.00% - 0.00%) | (0.00% - 0.00%) |
| Gunma     | 1.92%           | 1.73%           | 1.65%           | 1.53%           | 0.04%           | 0.03%           | 0.02%           | 0.01%           | 0.00%           | 0.00%           | 0.00%           | 0.00%           |
|           | (1.76% - 2.09%) | (1.59% - 1.88%) | (1.51% - 1.80%) | (1.40% - 1.66%) | (0.02% - 0.07%) | (0.01% - 0.05%) | (0.01% - 0.04%) | (0.00% - 0.03%) | (0.00% - 0.00%) | (0.00% - 0.00%) | (0.00% - 0.00%) | (0.00% - 0.00%) |
| Saitama   | 2.68%           | 2.39%           | 2.29%           | 2.15%           | 0.08%           | 0.06%           | 0.06%           | 0.04%           | 0.00%           | 0.00%           | 0.00%           | 0.00%           |
|           | (2.45% - 2.95%) | (2.17% - 2.62%) | (2.08% - 2.49%) | (1.96% - 2.36%) | (0.05% - 0.12%) | (0.03% - 0.09%) | (0.03% - 0.08%) | (0.02% - 0.07%) | (0.00% - 0.00%) | (0.00% - 0.00%) | (0.00% - 0.00%) | (0.00% - 0.00%) |
| Chiba     | 1.23%           | 1.15%           | 1.10%           | 1.03%           | 0.01%           | 0.01%           | 0.00%           | 0.00%           | 0.00%           | 0.00%           | 0.00%           | 0.00%           |
|           | (1.13% - 1.35%) | (1.05% - 1.25%) | (1.01% - 1.21%) | (0.95% - 1.12%) | (0.00% - 0.03%) | (0.00% - 0.02%) | (0.00% - 0.02%) | (0.00% - 0.01%) | (0.00% - 0.00%) | (0.00% - 0.00%) | (0.00% - 0.00%) | (0.00% - 0.00%) |
| Tōkyō     | 2.36%           | 2.18%           | 2.14%           | 1.95%           | 0.06%           | 0.05%           | 0.06%           | 0.03%           | 0.00%           | 0.00%           | 0.00%           | 0.00%           |
|           | (2.18% - 2.59%) | (2.00% - 2.37%) | (1.99% - 2.30%) | (1.80% - 2.11%) | (0.03% - 0.09%) | (0.03% - 0.08%) | (0.05% - 0.08%) | (0.01% - 0.06%) | (0.00% - 0.00%) | (0.00% - 0.00%) | (0.00% - 0.00%) | (0.00% - 0.00%) |
| Kanagawa  | 3.12%           | 2.86%           | 2.79%           | 2.61%           | 0.13%           | 0.11%           | 0.12%           | 0.09%           | 0.00%           | 0.00%           | 0.00%           | 0.00%           |
|           | (2.85% - 3.42%) | (2.63% - 3.11%) | (2.59% - 3.01%) | (2.39% - 2.83%) | (0.09% - 0.17%) | (0.08% - 0.15%) | (0.11% - 0.14%) | (0.06% - 0.12%) | (0.00% - 0.00%) | (0.00% - 0.00%) | (0.00% - 0.00%) | (0.00% - 0.00%) |
| Niigata   | 4.26%           | 3.84%           | 3.74%           | 3.53%           | 0.21%           | 0.16%           | 0.16%           | 0.13%           | 0.00%           | 0.00%           | 0.00%           | 0.00%           |
|           | (3.82% - 4.72%) | (3.47% - 4.26%) | (3.38% - 4.12%) | (3.20% - 3.89%) | (0.15% - 0.29%) | (0.11% - 0.22%) | (0.11% - 0.21%) | (0.09% - 0.18%) | (0.00% - 0.00%) | (0.00% - 0.00%) | (0.00% - 0.00%) | (0.00% - 0.00%) |
| Toyama    | 2.25%           | 2.26%           | 2.19%           | 2.07%           | 0.02%           | 0.05%           | 0.05%           | 0.04%           | 0.00%           | 0.00%           | 0.00%           | 0.00%           |
|           | (2.04% - 2.45%) | (2.06% - 2.47%) | (2.00% - 2.40%) | (1.90% - 2.27%) | (0.01% - 0.05%) | (0.02% - 0.07%) | (0.02% - 0.07%) | (0.02% - 0.06%) | (0.00% - 0.00%) | (0.00% - 0.00%) | (0.00% - 0.00%) | (0.00% - 0.00%) |
| Ishikawa  | 2.27%           | 2.27%           | 2.23%           | 2.13%           | 0.03%           | 0.05%           | 0.05%           | 0.04%           | 0.00%           | 0.00%           | 0.00%           | 0.00%           |
|           | (2.06% - 2.49%) | (2.07% - 2.48%) | (2.05% - 2.45%) | (1.94% - 2.33%) | (0.01% - 0.05%) | (0.02% - 0.08%) | (0.02% - 0.08%) | (0.02% - 0.07%) | (0.00% - 0.00%) | (0.00% - 0.00%) | (0.00% - 0.00%) | (0.00% - 0.00%) |
| Fukui     | 2.27%           | 2.27%           | 2.21%           | 2.11%           | 0.02%           | 0.04%           | 0.04%           | 0.03%           | 0.00%           | 0.00%           | 0.00%           | 0.00%           |
|           | (2.06% - 2.51%) | (2.07% - 2.48%) | (2.02% - 2.42%) | (1.92% - 2.31%) | (0.00% - 0.04%) | (0.02% - 0.07%) | (0.02% - 0.06%) | (0.01% - 0.05%) | (0.00% - 0.00%) | (0.00% - 0.00%) | (0.00% - 0.00%) | (0.00% - 0.00%) |
| Yamanashi | 2.32%           | 2.31%           | 2.24%           | 2.12%           | 0.02%           | 0.04%           | 0.04%           | 0.03%           | 0.00%           | 0.00%           | 0.00%           | 0.00%           |
|           | (2.09% - 2.56%) | (2.10% - 2.54%) | (2.04% - 2.46%) | (1.94% - 2.34%) | (0.00% - 0.04%) | (0.02% - 0.06%) | (0.01% - 0.06%) | (0.01% - 0.05%) | (0.00% - 0.00%) | (0.00% - 0.00%) | (0.00% - 0.00%) | (0.00% - 0.00%) |
| Nagano    | 2.20%           | 2.23%           | 2.18%           | 2.08%           | 0.01%           | 0.02%           | 0.02%           | 0.02%           | 0.00%           | 0.00%           | 0.00%           | 0.00%           |
|           | (2.00% - 2.41%) | (2.03% - 2.44%) | (1.99% - 2.40%) | (1.90% - 2.28%) | (0.00% - 0.02%) | (0.00% - 0.04%) | (0.00% - 0.04%) | (0.00% - 0.04%) | (0.00% - 0.00%) | (0.00% - 0.00%) | (0.00% - 0.00%) | (0.00% - 0.00%) |
| Gifu      | 2.30%           | 2.32%           | 2.25%           | 2.12%           | 0.02%           | 0.04%           | 0.04%           | 0.03%           | 0.00%           | 0.00%           | 0.00%           | 0.00%           |
|           | (2.10% - 2.53%) | (2.12% - 2.54%) | (2.05% - 2.48%) | (1.92% - 2.35%) | (0.00% - 0.04%) | (0.02% - 0.07%) | (0.01% - 0.07%) | (0.01% - 0.05%) | (0.00% - 0.00%) | (0.00% - 0.00%) | (0.00% - 0.00%) | (0.00% - 0.00%) |
| Shizuoka  | 3.59%           | 3.20%           | 3.06%           | 2.88%           | 0.15%           | 0.11%           | 0.10%           | 0.08%           | 0.00%           | 0.00%           | 0.00%           | 0.00%           |
|           | (3.25% - 3.95%) | (2.93% - 3.49%) | (2.78% - 3.34%) | (2.62% - 3.17%) | (0.11% - 0.20%) | (0.08% - 0.15%) | (0.07% - 0.14%) | (0.06% - 0.12%) | (0.00% - 0.00%) | (0.00% - 0.00%) | (0.00% - 0.00%) | (0.00% - 0.00%) |
| Aichi     | 3.21%           | 2.91%           | 2.78%           | 2.53%           | 0.11%           | 0.10%           | 0.10%           | 0.07%           | 0.00%           | 0.00%           | 0.00%           | 0.00%           |
|           | (2.93% - 3.51%) | (2.68% - 3.18%) | (2.57% - 3.02%) | (2.31% - 2.76%) | (0.08% - 0.15%) | (0.07% - 0.13%) | (0.09% - 0.12%) | (0.04% - 0.10%) | (0.00% - 0.00%) | (0.00% - 0.00%) | (0.00% - 0.00%) | (0.00% - 0.00%) |
| Mie       | 2.33%           | 2.34%           | 2.24%           | 2.08%           | 0.03%           | 0.06%           | 0.05%           | 0.04%           | 0.00%           | 0.00%           | 0.00%           | 0.00%           |
|           | (2.12% - 2.56%) | (2.15% - 2.55%) | (2.04% - 2.44%) | (1.91% - 2.26%) | (0.01% - 0.06%) | (0.03% - 0.09%) | (0.03% - 0.08%) | (0.02% - 0.06%) | (0.00% - 0.00%) | (0.00% - 0.00%) | (0.00% - 0.00%) | (0.00% - 0.00%) |
| Shiga     | 3.36%           | 3.05%           | 2.93%           | 2.75%           | 0.26%           | 0.21%           | 0.19%           | 0.16%           | 0.00%           | 0.00%           | 0.00%           | 0.00%           |
|           | (3.10% - 3.65%) | (2.82% - 3.30%) | (2.69% - 3.17%) | (2.53% - 2.97%) | (0.20% - 0.33%) | (0.14% - 0.27%) | (0.13% - 0.25%) | (0.10% - 0.21%) | (0.00% - 0.00%) | (0.00% - 0.00%) | (0.00% - 0.00%) | (0.00% - 0.00%) |
| Kyōto     | 4.73%           | 4.27%           | 4.07%           | 3.86%           | 0.41%           | 0.34%           | 0.31%           | 0.28%           | 0.00%           | 0.00%           | 0.00%           | 0.00%           |
|           | (4.31% - 5.18%) | (3.90% - 4.69%) | (3.73% - 4.42%) | (3.53% - 4.21%) | (0.33% - 0.50%) | (0.27% - 0.43%) | (0.24% - 0.39%) | (0.21% - 0.35%) | (0.00% - 0.00%) | (0.00% - 0.00%) | (0.00% - 0.00%) | (0.00% - 0.00%) |
| Ōsaka     | 3.26%           | 2.84%           | 2.70%           | 2.53%           | 0.13%           | 0.10%           | 0.09%           | 0.07%           | 0.00%           | 0.00%           | 0.00%           | 0.00%           |
|           | (2.97% - 3.60%) | (2.60% - 3.13%) | (2.47% - 2.94%) | (2.30% - 2.75%) | (0.09% - 0.17%) | (0.06% - 0.13%) | (0.06% - 0.12%) | (0.04% - 0.10%) | (0.00% - 0.00%) | (0.00% - 0.00%) | (0.00% - 0.00%) | (0.00% - 0.00%) |
| Hyōgo     | 3.94%           | 3.48%           | 3.35%           | 3.14%           | 0.20%           | 0.15%           | 0.15%           | 0.12%           | 0.00%           | 0.00%           | 0.00%           | 0.00%           |
|           | (3.59% - 4.33%) | (3.16% - 3.79%) | (3.07% - 3.66%) | (2.87% - 3.44%) | (0.15% - 0.26%) | (0.11% - 0.20%) | (0.10% - 0.19%) | (0.08% - 0.16%) | (0.00% - 0.00%) | (0.00% - 0.00%) | (0.00% - 0.00%) | (0.00% - 0.00%) |

Table S8b. Estimated overall, severe, and extreme wasting prevalence (%) in children under 5 years, both sexes, in 1990, 2000, 2010, and 2020.

| Location                  | Total           |                 |                 |                 | Severe          |                 |                 |                 | Extreme         |                 |                 |                 |
|---------------------------|-----------------|-----------------|-----------------|-----------------|-----------------|-----------------|-----------------|-----------------|-----------------|-----------------|-----------------|-----------------|
|                           | 1990            | 2000            | 2010            | 2020            | 1990            | 2000            | 2010            | 2020            | 1990            | 2000            | 2010            | 2020            |
| Nara                      | 2.35%           | 2.35%           | 2.32%           | 2.19%           | 0.01%           | 0.02%           | 0.02%           | 0.02%           | 0.00%           | 0.00%           | 0.00%           | 0.00%           |
|                           | (2.12% - 2.58%) | (2.14% - 2.57%) | (2.11% - 2.55%) | (1.99% - 2.41%) | (0.00% - 0.02%) | (0.00% - 0.05%) | (0.01% - 0.05%) | (0.00% - 0.04%) | (0.00% - 0.00%) | (0.00% - 0.00%) | (0.00% - 0.00%) | (0.00% - 0.00%) |
| Wakayama                  | 2.44%           | 2.43%           | 2.33%           | 2.16%           | 0.02%           | 0.05%           | 0.04%           | 0.03%           | 0.00%           | 0.00%           | 0.00%           | 0.00%           |
|                           | (2.22% - 2.69%) | (2.21% - 2.66%) | (2.13% - 2.56%) | (1.97% - 2.38%) | (0.01% - 0.05%) | (0.02% - 0.07%) | (0.02% - 0.07%) | (0.01% - 0.05%) | (0.00% - 0.00%) | (0.00% - 0.00%) | (0.00% - 0.00%) | (0.00% - 0.00%) |
| Tottori                   | 2.37%           | 2.37%           | 2.35%           | 2.22%           | 0.02%           | 0.05%           | 0.05%           | 0.04%           | 0.00%           | 0.00%           | 0.00%           | 0.00%           |
|                           | (2.16% - 2.62%) | (2.16% - 2.58%) | (2.15% - 2.56%) | (2.03% - 2.44%) | (0.01% - 0.05%) | (0.02% - 0.07%) | (0.02% - 0.08%) | (0.02% - 0.07%) | (0.00% - 0.00%) | (0.00% - 0.00%) | (0.00% - 0.00%) | (0.00% - 0.00%) |
| Shimane                   | 2.39%           | 2.37%           | 2.31%           | 2.15%           | 0.02%           | 0.04%           | 0.04%           | 0.03%           | 0.00%           | 0.00%           | 0.00%           | 0.00%           |
|                           | (2.17% - 2.64%) | (2.17% - 2.58%) | (2.10% - 2.53%) | (1.96% - 2.35%) | (0.00% - 0.04%) | (0.02% - 0.06%) | (0.02% - 0.06%) | (0.01% - 0.05%) | (0.00% - 0.00%) | (0.00% - 0.00%) | (0.00% - 0.00%) | (0.00% - 0.00%) |
| Okayama                   | 0.90%           | 0.82%           | 0.80%           | 0.75%           | 0.00%           | 0.00%           | 0.00%           | 0.00%           | 0.00%           | 0.00%           | 0.00%           | 0.00%           |
|                           | (0.73% - 1.02%) | (0.68% - 0.93%) | (0.67% - 0.90%) | (0.65% - 0.84%) | (0.00% - 0.01%) | (0.00% - 0.01%) | (0.00% - 0.00%) | (0.00% - 0.00%) | (0.00% - 0.00%) | (0.00% - 0.00%) | (0.00% - 0.00%) | (0.00% - 0.00%) |
| Hiroshima                 | 2.86%           | 2.58%           | 2.50%           | 2.33%           | 0.09%           | 0.07%           | 0.06%           | 0.05%           | 0.00%           | 0.00%           | 0.00%           | 0.00%           |
|                           | (2.61% - 3.13%) | (2.35% - 2.83%) | (2.29% - 2.75%) | (2.13% - 2.56%) | (0.06% - 0.13%) | (0.04% - 0.10%) | (0.04% - 0.09%) | (0.02% - 0.07%) | (0.00% - 0.00%) | (0.00% - 0.00%) | (0.00% - 0.00%) | (0.00% - 0.00%) |
| Yamaguchi                 | 2.34%           | 2.34%           | 2.26%           | 2.10%           | 0.02%           | 0.05%           | 0.04%           | 0.03%           | 0.00%           | 0.00%           | 0.00%           | 0.00%           |
|                           | (2.11% - 2.58%) | (2.13% - 2.56%) | (2.06% - 2.47%) | (1.91% - 2.30%) | (0.01% - 0.05%) | (0.02% - 0.08%) | (0.02% - 0.07%) | (0.01% - 0.06%) | (0.00% - 0.00%) | (0.00% - 0.00%) | (0.00% - 0.00%) | (0.00% - 0.00%) |
| Tokushima                 | 2.48%           | 2.44%           | 2.33%           | 2.16%           | 0.04%           | 0.07%           | 0.06%           | 0.05%           | 0.00%           | 0.00%           | 0.00%           | 0.00%           |
|                           | (2.24% - 2.74%) | (2.23% - 2.66%) | (2.12% - 2.55%) | (1.96% - 2.36%) | (0.02% - 0.07%) | (0.04% - 0.10%) | (0.03% - 0.09%) | (0.02% - 0.07%) | (0.00% - 0.00%) | (0.00% - 0.00%) | (0.00% - 0.00%) | (0.00% - 0.00%) |
| Kagawa                    | 2.29%           | 2.33%           | 2.27%           | 2.14%           | 0.03%           | 0.05%           | 0.05%           | 0.04%           | 0.00%           | 0.00%           | 0.00%           | 0.00%           |
|                           | (2.08% - 2.52%) | (2.12% - 2.55%) | (2.06% - 2.49%) | (1.95% - 2.33%) | (0.01% - 0.05%) | (0.02% - 0.08%) | (0.02% - 0.08%) | (0.02% - 0.07%) | (0.00% - 0.00%) | (0.00% - 0.00%) | (0.00% - 0.00%) | (0.00% - 0.00%) |
| Ehime                     | 2.42%           | 2.40%           | 2.34%           | 2.18%           | 0.02%           | 0.04%           | 0.04%           | 0.03%           | 0.00%           | 0.00%           | 0.00%           | 0.00%           |
|                           | (2.19% - 2.66%) | (2.20% - 2.62%) | (2.14% - 2.57%) | (1.98% - 2.39%) | (0.00% - 0.04%) | (0.02% - 0.07%) | (0.02% - 0.07%) | (0.01% - 0.05%) | (0.00% - 0.00%) | (0.00% - 0.00%) | (0.00% - 0.00%) | (0.00% - 0.00%) |
| Kōchi                     | 2.52%           | 2.49%           | 2.41%           | 2.23%           | 0.04%           | 0.06%           | 0.06%           | 0.04%           | 0.00%           | 0.00%           | 0.00%           | 0.00%           |
|                           | (2.27% - 2.79%) | (2.27% - 2.72%) | (2.19% - 2.64%) | (2.03% - 2.44%) | (0.02% - 0.06%) | (0.03% - 0.09%) | (0.03% - 0.09%) | (0.02% - 0.07%) | (0.00% - 0.00%) | (0.00% - 0.00%) | (0.00% - 0.00%) | (0.00% - 0.00%) |
| Fukuoka                   | 3.97%           | 3.56%           | 3.46%           | 3.20%           | 0.18%           | 0.15%           | 0.15%           | 0.11%           | 0.00%           | 0.00%           | 0.00%           | 0.00%           |
|                           | (3.62% - 4.38%) | (3.25% - 3.91%) | (3.18% - 3.74%) | (2.90% - 3.50%) | (0.13% - 0.24%) | (0.11% - 0.19%) | (0.13% - 0.17%) | (0.08% - 0.15%) | (0.00% - 0.00%) | (0.00% - 0.00%) | (0.00% - 0.00%) | (0.00% - 0.00%) |
| Saga                      | 2.44%           | 2.43%           | 2.35%           | 2.20%           | 0.02%           | 0.03%           | 0.03%           | 0.02%           | 0.00%           | 0.00%           | 0.00%           | 0.00%           |
|                           | (2.22% - 2.70%) | (2.23% - 2.66%) | (2.15% - 2.57%) | (2.01% - 2.42%) | (0.00% - 0.04%) | (0.01% - 0.06%) | (0.01% - 0.06%) | (0.01% - 0.05%) | (0.00% - 0.00%) | (0.00% - 0.00%) | (0.00% - 0.00%) | (0.00% - 0.00%) |
| Nagasaki                  | 3.24%           | 2.87%           | 2.76%           | 2.55%           | 0.25%           | 0.18%           | 0.16%           | 0.13%           | 0.00%           | 0.00%           | 0.00%           | 0.00%           |
|                           | (2.99% - 3.52%) | (2.63% - 3.11%) | (2.55% - 3.00%) | (2.34% - 2.78%) | (0.19% - 0.32%) | (0.12% - 0.25%) | (0.11% - 0.22%) | (0.08% - 0.19%) | (0.00% - 0.00%) | (0.00% - 0.00%) | (0.00% - 0.00%) | (0.00% - 0.00%) |
| Kumamoto                  | 2.38%           | 2.39%           | 2.37%           | 2.20%           | 0.01%           | 0.03%           | 0.03%           | 0.02%           | 0.00%           | 0.00%           | 0.00%           | 0.00%           |
|                           | (2.15% - 2.65%) | (2.16% - 2.63%) | (2.16% - 2.60%) | (1.98% - 2.41%) | (0.00% - 0.03%) | (0.01% - 0.06%) | (0.01% - 0.06%) | (0.01% - 0.05%) | (0.00% - 0.00%) | (0.00% - 0.00%) | (0.00% - 0.00%) | (0.00% - 0.00%) |
| Ōita                      | 2.38%           | 2.34%           | 2.29%           | 2.14%           | 0.04%           | 0.06%           | 0.06%           | 0.05%           | 0.00%           | 0.00%           | 0.00%           | 0.00%           |
|                           | (2.15% - 2.64%) | (2.13% - 2.56%) | (2.10% - 2.51%) | (1.96% - 2.35%) | (0.01% - 0.06%) | (0.03% - 0.09%) | (0.03% - 0.09%) | (0.02% - 0.07%) | (0.00% - 0.00%) | (0.00% - 0.00%) | (0.00% - 0.00%) | (0.00% - 0.00%) |
| Miyazaki                  | 2.52%           | 2.46%           | 2.41%           | 2.23%           | 0.03%           | 0.05%           | 0.05%           | 0.04%           | 0.00%           | 0.00%           | 0.00%           | 0.00%           |
|                           | (2.28% - 2.79%) | (2.24% - 2.70%) | (2.19% - 2.64%) | (2.01% - 2.44%) | (0.01% - 0.06%) | (0.02% - 0.08%) | (0.02% - 0.08%) | (0.02% - 0.06%) | (0.00% - 0.00%) | (0.00% - 0.00%) | (0.00% - 0.00%) | (0.00% - 0.00%) |
| Kagoshima                 | 2.59%           | 2.53%           | 2.43%           | 2.23%           | 0.03%           | 0.05%           | 0.04%           | 0.03%           | 0.00%           | 0.00%           | 0.00%           | 0.00%           |
|                           | (2.35% - 2.83%) | (2.31% - 2.76%) | (2.21% - 2.66%) | (2.03% - 2.46%) | (0.01% - 0.05%) | (0.02% - 0.08%) | (0.02% - 0.07%) | (0.01% - 0.05%) | (0.00% - 0.00%) | (0.00% - 0.00%) | (0.00% - 0.00%) | (0.00% - 0.00%) |
| Okinawa                   | 2.61%           | 2.66%           | 2.55%           | 2.33%           | 0.02%           | 0.05%           | 0.05%           | 0.03%           | 0.00%           | 0.00%           | 0.00%           | 0.00%           |
|                           | (2.36% - 2.87%) | (2.42% - 2.90%) | (2.33% - 2.80%) | (2.12% - 2.56%) | (0.01% - 0.04%) | (0.02% - 0.08%) | (0.02% - 0.08%) | (0.01% - 0.06%) | (0.00% - 0.00%) | (0.00% - 0.00%) | (0.00% - 0.00%) | (0.00% - 0.00%) |
| Republic of Korea         | 2.23%           | 1.46%           | 1.19%           | 1.07%           | 0.02%           | 0.00%           | 0.00%           | 0.00%           | 0.00%           | 0.00%           | 0.00%           | 0.00%           |
|                           | (2.04% - 2.44%) | (1.33% - 1.60%) | (1.08% - 1.32%) | (0.96% - 1.20%) | (0.01% - 0.04%) | (0.00% - 0.01%) | (0.00% - 0.00%) | (0.00% - 0.00%) | (0.00% - 0.00%) | (0.00% - 0.00%) | (0.00% - 0.00%) | (0.00% - 0.00%) |
| Singapore                 | 5.05%           | 3.67%           | 2.96%           | 2.69%           | 0.37%           | 0.07%           | 0.01%           | 0.01%           | 0.00%           | 0.00%           | 0.00%           | 0.00%           |
|                           | (4.56% - 5.56%) | (3.37% - 3.98%) | (2.66% - 3.29%) | (2.40% - 3.05%) | (0.24% - 0.53%) | (0.03% - 0.13%) | (0.00% - 0.04%) | (0.00% - 0.03%) | (0.00% - 0.00%) | (0.00% - 0.00%) | (0.00% - 0.00%) | (0.00% - 0.00%) |
| High-income North America | 0.59%           | 0.53%           | 0.50%           | 0.48%           | 0.00%           | 0.00%           | 0.00%           | 0.00%           | 0.00%           | 0.00%           | 0.00%           | 0.00%           |
|                           | (0.53% - 0.65%) | (0.45% - 0.60%) | (0.44% - 0.55%) | (0.42% - 0.54%) | (0.00% - 0.00%) | (0.00% - 0.00%) | (0.00% - 0.00%) | (0.00% - 0.00%) | (0.00% - 0.00%) | (0.00% - 0.00%) | (0.00% - 0.00%) | (0.00% - 0.00%) |
| Canada                    | 0.62%           | 0.50%           | 0.46%           | 0.44%           | 0.00%           | 0.00%           | 0.00%           | 0.00%           | 0.00%           | 0.00%           | 0.00%           | 0.00%           |
|                           | (0.55% - 0.71%) | (0.31% - 0.63%) | (0.32% - 0.57%) | (0.31% - 0.56%) | (0.00% - 0.00%) | (0.00% - 0.00%) | (0.00% - 0.00%) | (0.00% - 0.00%) | (0.00% - 0.00%) | (0.00% - 0.00%) | (0.00% - 0.00%) | (0.00% - 0.00%) |

Table S8b. Estimated overall, severe, and extreme wasting prevalence (%) in children under 5 years, both sexes, in 1990, 2000, 2010, and 2020.

| Location                 | Total                    |                          |                          |                          | Severe                   |                          |                          |                          | Extreme                  |                          |                          |                          |
|--------------------------|--------------------------|--------------------------|--------------------------|--------------------------|--------------------------|--------------------------|--------------------------|--------------------------|--------------------------|--------------------------|--------------------------|--------------------------|
|                          | 1990                     | 2000                     | 2010                     | 2020                     | 1990                     | 2000                     | 2010                     | 2020                     | 1990                     | 2000                     | 2010                     | 2020                     |
| United States of America | 0.59%<br>(0.52% - 0.65%) | 0.53%<br>(0.45% - 0.61%) | 0.50%<br>(0.44% - 0.56%) | 0.49%<br>(0.42% - 0.55%) | 0.00%<br>(0.00% - 0.00%) | 0.00%<br>(0.00% - 0.00%) | 0.00%<br>(0.00% - 0.00%) | 0.00%<br>(0.00% - 0.00%) | 0.00%<br>(0.00% - 0.00%) | 0.00%<br>(0.00% - 0.00%) | 0.00%<br>(0.00% - 0.00%) | 0.00%<br>(0.00% - 0.00%) |
| Alabama                  | 0.67%<br>(0.59% - 0.75%) | 0.64%<br>(0.50% - 0.73%) | 0.59%<br>(0.49% - 0.72%) | 0.60%<br>(0.50% - 0.72%) | 0.00%<br>(0.00% - 0.00%) | 0.00%<br>(0.00% - 0.00%) | 0.00%<br>(0.00% - 0.00%) | 0.00%<br>(0.00% - 0.00%) | 0.00%<br>(0.00% - 0.00%) | 0.00%<br>(0.00% - 0.00%) | 0.00%<br>(0.00% - 0.00%) | 0.00%<br>(0.00% - 0.00%) |
| Alaska                   | 0.61%<br>(0.47% - 0.71%) | 0.55%<br>(0.41% - 0.67%) | 0.53%<br>(0.38% - 0.66%) | 0.49%<br>(0.34% - 0.61%) | 0.00%<br>(0.00% - 0.00%) | 0.00%<br>(0.00% - 0.00%) | 0.00%<br>(0.00% - 0.00%) | 0.00%<br>(0.00% - 0.00%) | 0.00%<br>(0.00% - 0.00%) | 0.00%<br>(0.00% - 0.00%) | 0.00%<br>(0.00% - 0.00%) | 0.00%<br>(0.00% - 0.00%) |
| Arizona                  | 0.63%<br>(0.51% - 0.73%) | 0.60%<br>(0.47% - 0.70%) | 0.53%<br>(0.40% - 0.65%) | 0.51%<br>(0.37% - 0.64%) | 0.00%<br>(0.00% - 0.00%) | 0.00%<br>(0.00% - 0.00%) | 0.00%<br>(0.00% - 0.00%) | 0.00%<br>(0.00% - 0.00%) | 0.00%<br>(0.00% - 0.00%) | 0.00%<br>(0.00% - 0.00%) | 0.00%<br>(0.00% - 0.00%) | 0.00%<br>(0.00% - 0.00%) |
| Arkansas                 | 0.67%<br>(0.59% - 0.75%) | 0.65%<br>(0.52% - 0.75%) | 0.62%<br>(0.51% - 0.75%) | 0.60%<br>(0.50% - 0.72%) | 0.00%<br>(0.00% - 0.00%) | 0.00%<br>(0.00% - 0.00%) | 0.00%<br>(0.00% - 0.00%) | 0.00%<br>(0.00% - 0.00%) | 0.00%<br>(0.00% - 0.00%) | 0.00%<br>(0.00% - 0.00%) | 0.00%<br>(0.00% - 0.00%) | 0.00%<br>(0.00% - 0.00%) |
| California               | 0.61%<br>(0.48% - 0.70%) | 0.50%<br>(0.32% - 0.63%) | 0.47%<br>(0.32% - 0.58%) | 0.44%<br>(0.31% - 0.56%) | 0.00%<br>(0.00% - 0.00%) | 0.00%<br>(0.00% - 0.00%) | 0.00%<br>(0.00% - 0.00%) | 0.00%<br>(0.00% - 0.00%) | 0.00%<br>(0.00% - 0.00%) | 0.00%<br>(0.00% - 0.00%) | 0.00%<br>(0.00% - 0.00%) | 0.00%<br>(0.00% - 0.00%) |
| Colorado                 | 0.52%<br>(0.35% - 0.63%) | 0.49%<br>(0.32% - 0.62%) | 0.48%<br>(0.33% - 0.60%) | 0.46%<br>(0.32% - 0.58%) | 0.00%<br>(0.00% - 0.00%) | 0.00%<br>(0.00% - 0.00%) | 0.00%<br>(0.00% - 0.00%) | 0.00%<br>(0.00% - 0.00%) | 0.00%<br>(0.00% - 0.00%) | 0.00%<br>(0.00% - 0.00%) | 0.00%<br>(0.00% - 0.00%) | 0.00%<br>(0.00% - 0.00%) |
| Connecticut              | 0.44%<br>(0.29% - 0.59%) | 0.39%<br>(0.24% - 0.56%) | 0.39%<br>(0.26% - 0.52%) | 0.40%<br>(0.28% - 0.53%) | 0.00%<br>(0.00% - 0.00%) | 0.00%<br>(0.00% - 0.00%) | 0.00%<br>(0.00% - 0.00%) | 0.00%<br>(0.00% - 0.00%) | 0.00%<br>(0.00% - 0.00%) | 0.00%<br>(0.00% - 0.00%) | 0.00%<br>(0.00% - 0.00%) | 0.00%<br>(0.00% - 0.00%) |
| Delaware                 | 0.58%<br>(0.44% - 0.68%) | 0.51%<br>(0.33% - 0.63%) | 0.49%<br>(0.34% - 0.60%) | 0.48%<br>(0.34% - 0.59%) | 0.00%<br>(0.00% - 0.00%) | 0.00%<br>(0.00% - 0.00%) | 0.00%<br>(0.00% - 0.00%) | 0.00%<br>(0.00% - 0.00%) | 0.00%<br>(0.00% - 0.00%) | 0.00%<br>(0.00% - 0.00%) | 0.00%<br>(0.00% - 0.00%) | 0.00%<br>(0.00% - 0.00%) |
| District of Columbia     | 0.80%<br>(0.72% - 0.90%) | 0.63%<br>(0.49% - 0.73%) | 0.56%<br>(0.42% - 0.68%) | 0.52%<br>(0.37% - 0.64%) | 0.00%<br>(0.00% - 0.00%) | 0.00%<br>(0.00% - 0.00%) | 0.00%<br>(0.00% - 0.00%) | 0.00%<br>(0.00% - 0.00%) | 0.00%<br>(0.00% - 0.00%) | 0.00%<br>(0.00% - 0.00%) | 0.00%<br>(0.00% - 0.00%) | 0.00%<br>(0.00% - 0.00%) |
| Florida                  | 0.58%<br>(0.45% - 0.68%) | 0.51%<br>(0.33% - 0.63%) | 0.49%<br>(0.34% - 0.61%) | 0.48%<br>(0.34% - 0.59%) | 0.00%<br>(0.00% - 0.00%) | 0.00%<br>(0.00% - 0.00%) | 0.00%<br>(0.00% - 0.00%) | 0.00%<br>(0.00% - 0.00%) | 0.00%<br>(0.00% - 0.00%) | 0.00%<br>(0.00% - 0.00%) | 0.00%<br>(0.00% - 0.00%) | 0.00%<br>(0.00% - 0.00%) |
| Georgia                  | 0.66%<br>(0.55% - 0.75%) | 0.61%<br>(0.47% - 0.71%) | 0.54%<br>(0.45% - 0.68%) | 0.53%<br>(0.38% - 0.66%) | 0.00%<br>(0.00% - 0.00%) | 0.00%<br>(0.00% - 0.00%) | 0.00%<br>(0.00% - 0.00%) | 0.00%<br>(0.00% - 0.00%) | 0.00%<br>(0.00% - 0.00%) | 0.00%<br>(0.00% - 0.00%) | 0.00%<br>(0.00% - 0.00%) | 0.00%<br>(0.00% - 0.00%) |
| Hawaii                   | 0.55%<br>(0.41% - 0.66%) | 0.48%<br>(0.31% - 0.62%) | 0.48%<br>(0.34% - 0.61%) | 0.47%<br>(0.33% - 0.60%) | 0.00%<br>(0.00% - 0.00%) | 0.00%<br>(0.00% - 0.00%) | 0.00%<br>(0.00% - 0.00%) | 0.00%<br>(0.00% - 0.00%) | 0.00%<br>(0.00% - 0.00%) | 0.00%<br>(0.00% - 0.00%) | 0.00%<br>(0.00% - 0.00%) | 0.00%<br>(0.00% - 0.00%) |
| Idaho                    | 0.63%<br>(0.51% - 0.71%) | 0.59%<br>(0.45% - 0.69%) | 0.54%<br>(0.45% - 0.66%) | 0.52%<br>(0.37% - 0.66%) | 0.00%<br>(0.00% - 0.00%) | 0.00%<br>(0.00% - 0.00%) | 0.00%<br>(0.00% - 0.00%) | 0.00%<br>(0.00% - 0.00%) | 0.00%<br>(0.00% - 0.00%) | 0.00%<br>(0.00% - 0.00%) | 0.00%<br>(0.00% - 0.00%) | 0.00%<br>(0.00% - 0.00%) |
| Illinois                 | 0.60%<br>(0.47% - 0.69%) | 0.51%<br>(0.33% - 0.64%) | 0.47%<br>(0.32% - 0.59%) | 0.46%<br>(0.32% - 0.57%) | 0.00%<br>(0.00% - 0.00%) | 0.00%<br>(0.00% - 0.00%) | 0.00%<br>(0.00% - 0.00%) | 0.00%<br>(0.00% - 0.00%) | 0.00%<br>(0.00% - 0.00%) | 0.00%<br>(0.00% - 0.00%) | 0.00%<br>(0.00% - 0.00%) | 0.00%<br>(0.00% - 0.00%) |
| Indiana                  | 0.60%<br>(0.47% - 0.69%) | 0.56%<br>(0.43% - 0.68%) | 0.54%<br>(0.45% - 0.65%) | 0.53%<br>(0.37% - 0.65%) | 0.00%<br>(0.00% - 0.00%) | 0.00%<br>(0.00% - 0.00%) | 0.00%<br>(0.00% - 0.00%) | 0.00%<br>(0.00% - 0.00%) | 0.00%<br>(0.00% - 0.00%) | 0.00%<br>(0.00% - 0.00%) | 0.00%<br>(0.00% - 0.00%) | 0.00%<br>(0.00% - 0.00%) |
| Iowa                     | 0.53%<br>(0.36% - 0.64%) | 0.50%<br>(0.32% - 0.63%) | 0.48%<br>(0.33% - 0.61%) | 0.46%<br>(0.32% - 0.59%) | 0.00%<br>(0.00% - 0.00%) | 0.00%<br>(0.00% - 0.00%) | 0.00%<br>(0.00% - 0.00%) | 0.00%<br>(0.00% - 0.00%) | 0.00%<br>(0.00% - 0.00%) | 0.00%<br>(0.00% - 0.00%) | 0.00%<br>(0.00% - 0.00%) | 0.00%<br>(0.00% - 0.00%) |
| Kansas                   | 0.56%<br>(0.43% - 0.66%) | 0.53%<br>(0.35% - 0.65%) | 0.52%<br>(0.38% - 0.64%) | 0.50%<br>(0.35% - 0.62%) | 0.00%<br>(0.00% - 0.00%) | 0.00%<br>(0.00% - 0.00%) | 0.00%<br>(0.00% - 0.00%) | 0.00%<br>(0.00% - 0.00%) | 0.00%<br>(0.00% - 0.00%) | 0.00%<br>(0.00% - 0.00%) | 0.00%<br>(0.00% - 0.00%) | 0.00%<br>(0.00% - 0.00%) |
| Kentucky                 | 0.62%<br>(0.50% - 0.71%) | 0.59%<br>(0.46% - 0.70%) | 0.58%<br>(0.47% - 0.70%) | 0.55%<br>(0.40% - 0.67%) | 0.00%<br>(0.00% - 0.00%) | 0.00%<br>(0.00% - 0.00%) | 0.00%<br>(0.00% - 0.00%) | 0.00%<br>(0.00% - 0.00%) | 0.00%<br>(0.00% - 0.00%) | 0.00%<br>(0.00% - 0.00%) | 0.00%<br>(0.00% - 0.00%) | 0.00%<br>(0.00% - 0.00%) |
| Louisiana                | 0.67%<br>(0.59% - 0.76%) | 0.65%<br>(0.51% - 0.75%) | 0.57%<br>(0.48% - 0.69%) | 0.56%<br>(0.47% - 0.69%) | 0.00%<br>(0.00% - 0.00%) | 0.00%<br>(0.00% - 0.00%) | 0.00%<br>(0.00% - 0.00%) | 0.00%<br>(0.00% - 0.00%) | 0.00%<br>(0.00% - 0.00%) | 0.00%<br>(0.00% - 0.00%) | 0.00%<br>(0.00% - 0.00%) | 0.00%<br>(0.00% - 0.00%) |
| Maine                    | 0.52%<br>(0.38% - 0.64%) | 0.48%<br>(0.31% - 0.61%) | 0.47%<br>(0.32% - 0.59%) | 0.47%<br>(0.33% - 0.60%) | 0.00%<br>(0.00% - 0.00%) | 0.00%<br>(0.00% - 0.00%) | 0.00%<br>(0.00% - 0.00%) | 0.00%<br>(0.00% - 0.00%) | 0.00%<br>(0.00% - 0.00%) | 0.00%<br>(0.00% - 0.00%) | 0.00%<br>(0.00% - 0.00%) | 0.00%<br>(0.00% - 0.00%) |
| Maryland                 | 0.55%<br>(0.43% - 0.65%) | 0.49%<br>(0.31% - 0.63%) | 0.46%<br>(0.32% - 0.58%) | 0.46%<br>(0.33% - 0.58%) | 0.00%<br>(0.00% - 0.00%) | 0.00%<br>(0.00% - 0.00%) | 0.00%<br>(0.00% - 0.00%) | 0.00%<br>(0.00% - 0.00%) | 0.00%<br>(0.00% - 0.00%) | 0.00%<br>(0.00% - 0.00%) | 0.00%<br>(0.00% - 0.00%) | 0.00%<br>(0.00% - 0.00%) |
| Massachusetts            | 0.44%<br>(0.29% - 0.58%) | 0.38%<br>(0.25% - 0.54%) | 0.40%<br>(0.27% - 0.54%) | 0.38%<br>(0.27% - 0.51%) | 0.00%<br>(0.00% - 0.00%) | 0.00%<br>(0.00% - 0.00%) | 0.00%<br>(0.00% - 0.00%) | 0.00%<br>(0.00% - 0.00%) | 0.00%<br>(0.00% - 0.00%) | 0.00%<br>(0.00% - 0.00%) | 0.00%<br>(0.00% - 0.00%) | 0.00%<br>(0.00% - 0.00%) |

Table S8b. Estimated overall, severe, and extreme wasting prevalence (%) in children under 5 years, both sexes, in 1990, 2000, 2010, and 2020.

| Location              | Total                    |                          |                          |                          | Severe                   |                          |                          |                          | Extreme                  |                          |                          |                          |
|-----------------------|--------------------------|--------------------------|--------------------------|--------------------------|--------------------------|--------------------------|--------------------------|--------------------------|--------------------------|--------------------------|--------------------------|--------------------------|
|                       | 1990                     | 2000                     | 2010                     | 2020                     | 1990                     | 2000                     | 2010                     | 2020                     | 1990                     | 2000                     | 2010                     | 2020                     |
| <i>Michigan</i>       | 0.60%<br>(0.47% - 0.70%) | 0.53%<br>(0.36% - 0.66%) | 0.52%<br>(0.39% - 0.65%) | 0.50%<br>(0.35% - 0.63%) | 0.00%<br>(0.00% - 0.00%) | 0.00%<br>(0.00% - 0.00%) | 0.00%<br>(0.00% - 0.00%) | 0.00%<br>(0.00% - 0.00%) | 0.00%<br>(0.00% - 0.00%) | 0.00%<br>(0.00% - 0.00%) | 0.00%<br>(0.00% - 0.00%) | 0.00%<br>(0.00% - 0.00%) |
| <i>Minnesota</i>      | 0.46%<br>(0.29% - 0.59%) | 0.42%<br>(0.27% - 0.58%) | 0.43%<br>(0.29% - 0.56%) | 0.41%<br>(0.29% - 0.54%) | 0.00%<br>(0.00% - 0.00%) | 0.00%<br>(0.00% - 0.00%) | 0.00%<br>(0.00% - 0.00%) | 0.00%<br>(0.00% - 0.00%) | 0.00%<br>(0.00% - 0.00%) | 0.00%<br>(0.00% - 0.00%) | 0.00%<br>(0.00% - 0.00%) | 0.00%<br>(0.00% - 0.00%) |
| <i>Mississippi</i>    | 0.70%<br>(0.63% - 0.79%) | 0.69%<br>(0.57% - 0.78%) | 0.65%<br>(0.53% - 0.76%) | 0.64%<br>(0.52% - 0.76%) | 0.00%<br>(0.00% - 0.00%) | 0.00%<br>(0.00% - 0.00%) | 0.00%<br>(0.00% - 0.00%) | 0.00%<br>(0.00% - 0.00%) | 0.00%<br>(0.00% - 0.00%) | 0.00%<br>(0.00% - 0.00%) | 0.00%<br>(0.00% - 0.00%) | 0.00%<br>(0.00% - 0.00%) |
| <i>Missouri</i>       | 0.60%<br>(0.47% - 0.69%) | 0.55%<br>(0.41% - 0.66%) | 0.53%<br>(0.39% - 0.66%) | 0.54%<br>(0.39% - 0.66%) | 0.00%<br>(0.00% - 0.00%) | 0.00%<br>(0.00% - 0.00%) | 0.00%<br>(0.00% - 0.00%) | 0.00%<br>(0.00% - 0.00%) | 0.00%<br>(0.00% - 0.00%) | 0.00%<br>(0.00% - 0.00%) | 0.00%<br>(0.00% - 0.00%) | 0.00%<br>(0.00% - 0.00%) |
| <i>Montana</i>        | 0.59%<br>(0.46% - 0.69%) | 0.56%<br>(0.42% - 0.67%) | 0.53%<br>(0.43% - 0.66%) | 0.50%<br>(0.34% - 0.63%) | 0.00%<br>(0.00% - 0.00%) | 0.00%<br>(0.00% - 0.00%) | 0.00%<br>(0.00% - 0.00%) | 0.00%<br>(0.00% - 0.00%) | 0.00%<br>(0.00% - 0.00%) | 0.00%<br>(0.00% - 0.00%) | 0.00%<br>(0.00% - 0.00%) | 0.00%<br>(0.00% - 0.00%) |
| <i>Nebraska</i>       | 0.53%<br>(0.39% - 0.65%) | 0.50%<br>(0.33% - 0.63%) | 0.48%<br>(0.33% - 0.60%) | 0.45%<br>(0.32% - 0.57%) | 0.00%<br>(0.00% - 0.00%) | 0.00%<br>(0.00% - 0.00%) | 0.00%<br>(0.00% - 0.00%) | 0.00%<br>(0.00% - 0.00%) | 0.00%<br>(0.00% - 0.00%) | 0.00%<br>(0.00% - 0.00%) | 0.00%<br>(0.00% - 0.00%) | 0.00%<br>(0.00% - 0.00%) |
| <i>Nevada</i>         | 0.65%<br>(0.54% - 0.74%) | 0.61%<br>(0.47% - 0.71%) | 0.55%<br>(0.45% - 0.68%) | 0.55%<br>(0.42% - 0.68%) | 0.00%<br>(0.00% - 0.00%) | 0.00%<br>(0.00% - 0.00%) | 0.00%<br>(0.00% - 0.00%) | 0.00%<br>(0.00% - 0.00%) | 0.00%<br>(0.00% - 0.00%) | 0.00%<br>(0.00% - 0.00%) | 0.00%<br>(0.00% - 0.00%) | 0.00%<br>(0.00% - 0.00%) |
| <i>New Hampshire</i>  | 0.47%<br>(0.29% - 0.60%) | 0.41%<br>(0.26% - 0.55%) | 0.41%<br>(0.28% - 0.53%) | 0.41%<br>(0.29% - 0.55%) | 0.00%<br>(0.00% - 0.00%) | 0.00%<br>(0.00% - 0.00%) | 0.00%<br>(0.00% - 0.00%) | 0.00%<br>(0.00% - 0.00%) | 0.00%<br>(0.00% - 0.00%) | 0.00%<br>(0.00% - 0.00%) | 0.00%<br>(0.00% - 0.00%) | 0.00%<br>(0.00% - 0.00%) |
| <i>New Jersey</i>     | 0.50%<br>(0.32% - 0.63%) | 0.43%<br>(0.27% - 0.58%) | 0.43%<br>(0.29% - 0.56%) | 0.43%<br>(0.30% - 0.55%) | 0.00%<br>(0.00% - 0.00%) | 0.00%<br>(0.00% - 0.00%) | 0.00%<br>(0.00% - 0.00%) | 0.00%<br>(0.00% - 0.00%) | 0.00%<br>(0.00% - 0.00%) | 0.00%<br>(0.00% - 0.00%) | 0.00%<br>(0.00% - 0.00%) | 0.00%<br>(0.00% - 0.00%) |
| <i>New Mexico</i>     | 0.67%<br>(0.60% - 0.75%) | 0.64%<br>(0.49% - 0.75%) | 0.58%<br>(0.49% - 0.70%) | 0.58%<br>(0.49% - 0.71%) | 0.00%<br>(0.00% - 0.00%) | 0.00%<br>(0.00% - 0.00%) | 0.00%<br>(0.00% - 0.00%) | 0.00%<br>(0.00% - 0.00%) | 0.00%<br>(0.00% - 0.00%) | 0.00%<br>(0.00% - 0.00%) | 0.00%<br>(0.00% - 0.00%) | 0.00%<br>(0.00% - 0.00%) |
| <i>New York</i>       | 0.57%<br>(0.44% - 0.67%) | 0.45%<br>(0.29% - 0.59%) | 0.45%<br>(0.32% - 0.57%) | 0.44%<br>(0.31% - 0.57%) | 0.00%<br>(0.00% - 0.00%) | 0.00%<br>(0.00% - 0.00%) | 0.00%<br>(0.00% - 0.00%) | 0.00%<br>(0.00% - 0.00%) | 0.00%<br>(0.00% - 0.00%) | 0.00%<br>(0.00% - 0.00%) | 0.00%<br>(0.00% - 0.00%) | 0.00%<br>(0.00% - 0.00%) |
| <i>North Carolina</i> | 0.64%<br>(0.51% - 0.73%) | 0.58%<br>(0.44% - 0.69%) | 0.53%<br>(0.39% - 0.65%) | 0.52%<br>(0.37% - 0.66%) | 0.00%<br>(0.00% - 0.00%) | 0.00%<br>(0.00% - 0.00%) | 0.00%<br>(0.00% - 0.00%) | 0.00%<br>(0.00% - 0.00%) | 0.00%<br>(0.00% - 0.00%) | 0.00%<br>(0.00% - 0.00%) | 0.00%<br>(0.00% - 0.00%) | 0.00%<br>(0.00% - 0.00%) |
| <i>North Dakota</i>   | 0.55%<br>(0.41% - 0.65%) | 0.50%<br>(0.32% - 0.64%) | 0.51%<br>(0.36% - 0.63%) | 0.45%<br>(0.31% - 0.58%) | 0.00%<br>(0.00% - 0.00%) | 0.00%<br>(0.00% - 0.00%) | 0.00%<br>(0.00% - 0.00%) | 0.00%<br>(0.00% - 0.00%) | 0.00%<br>(0.00% - 0.00%) | 0.00%<br>(0.00% - 0.00%) | 0.00%<br>(0.00% - 0.00%) | 0.00%<br>(0.00% - 0.00%) |
| <i>Ohio</i>           | 0.59%<br>(0.45% - 0.68%) | 0.55%<br>(0.42% - 0.66%) | 0.53%<br>(0.38% - 0.65%) | 0.55%<br>(0.45% - 0.67%) | 0.00%<br>(0.00% - 0.00%) | 0.00%<br>(0.00% - 0.00%) | 0.00%<br>(0.00% - 0.00%) | 0.00%<br>(0.00% - 0.00%) | 0.00%<br>(0.00% - 0.00%) | 0.00%<br>(0.00% - 0.00%) | 0.00%<br>(0.00% - 0.00%) | 0.00%<br>(0.00% - 0.00%) |
| <i>Oklahoma</i>       | 0.62%<br>(0.50% - 0.71%) | 0.64%<br>(0.50% - 0.74%) | 0.60%<br>(0.50% - 0.71%) | 0.56%<br>(0.46% - 0.69%) | 0.00%<br>(0.00% - 0.00%) | 0.00%<br>(0.00% - 0.00%) | 0.00%<br>(0.00% - 0.00%) | 0.00%<br>(0.00% - 0.00%) | 0.00%<br>(0.00% - 0.00%) | 0.00%<br>(0.00% - 0.00%) | 0.00%<br>(0.00% - 0.00%) | 0.00%<br>(0.00% - 0.00%) |
| <i>Oregon</i>         | 0.56%<br>(0.42% - 0.66%) | 0.50%<br>(0.32% - 0.63%) | 0.49%<br>(0.33% - 0.61%) | 0.46%<br>(0.32% - 0.58%) | 0.00%<br>(0.00% - 0.00%) | 0.00%<br>(0.00% - 0.00%) | 0.00%<br>(0.00% - 0.00%) | 0.00%<br>(0.00% - 0.00%) | 0.00%<br>(0.00% - 0.00%) | 0.00%<br>(0.00% - 0.00%) | 0.00%<br>(0.00% - 0.00%) | 0.00%<br>(0.00% - 0.00%) |
| <i>Pennsylvania</i>   | 0.56%<br>(0.43% - 0.67%) | 0.49%<br>(0.31% - 0.62%) | 0.48%<br>(0.33% - 0.59%) | 0.47%<br>(0.33% - 0.59%) | 0.00%<br>(0.00% - 0.00%) | 0.00%<br>(0.00% - 0.00%) | 0.00%<br>(0.00% - 0.00%) | 0.00%<br>(0.00% - 0.00%) | 0.00%<br>(0.00% - 0.00%) | 0.00%<br>(0.00% - 0.00%) | 0.00%<br>(0.00% - 0.00%) | 0.00%<br>(0.00% - 0.00%) |
| <i>Rhode Island</i>   | 0.51%<br>(0.34% - 0.62%) | 0.45%<br>(0.28% - 0.59%) | 0.44%<br>(0.31% - 0.57%) | 0.43%<br>(0.31% - 0.57%) | 0.00%<br>(0.00% - 0.00%) | 0.00%<br>(0.00% - 0.00%) | 0.00%<br>(0.00% - 0.00%) | 0.00%<br>(0.00% - 0.00%) | 0.00%<br>(0.00% - 0.00%) | 0.00%<br>(0.00% - 0.00%) | 0.00%<br>(0.00% - 0.00%) | 0.00%<br>(0.00% - 0.00%) |
| <i>South Carolina</i> | 0.68%<br>(0.60% - 0.76%) | 0.63%<br>(0.48% - 0.73%) | 0.58%<br>(0.48% - 0.70%) | 0.57%<br>(0.48% - 0.69%) | 0.00%<br>(0.00% - 0.00%) | 0.00%<br>(0.00% - 0.00%) | 0.00%<br>(0.00% - 0.00%) | 0.00%<br>(0.00% - 0.00%) | 0.00%<br>(0.00% - 0.00%) | 0.00%<br>(0.00% - 0.00%) | 0.00%<br>(0.00% - 0.00%) | 0.00%<br>(0.00% - 0.00%) |
| <i>South Dakota</i>   | 0.59%<br>(0.46% - 0.69%) | 0.54%<br>(0.36% - 0.66%) | 0.52%<br>(0.38% - 0.65%) | 0.51%<br>(0.36% - 0.63%) | 0.00%<br>(0.00% - 0.00%) | 0.00%<br>(0.00% - 0.00%) | 0.00%<br>(0.00% - 0.00%) | 0.00%<br>(0.00% - 0.00%) | 0.00%<br>(0.00% - 0.00%) | 0.00%<br>(0.00% - 0.00%) | 0.00%<br>(0.00% - 0.00%) | 0.00%<br>(0.00% - 0.00%) |
| <i>Tennessee</i>      | 0.65%<br>(0.55% - 0.74%) | 0.61%<br>(0.47% - 0.71%) | 0.63%<br>(0.52% - 0.75%) | 0.56%<br>(0.43% - 0.68%) | 0.00%<br>(0.00% - 0.00%) | 0.00%<br>(0.00% - 0.00%) | 0.00%<br>(0.00% - 0.00%) | 0.00%<br>(0.00% - 0.00%) | 0.00%<br>(0.00% - 0.00%) | 0.00%<br>(0.00% - 0.00%) | 0.00%<br>(0.00% - 0.00%) | 0.00%<br>(0.00% - 0.00%) |
| <i>Texas</i>          | 0.64%<br>(0.52% - 0.73%) | 0.61%<br>(0.48% - 0.72%) | 0.54%<br>(0.45% - 0.66%) | 0.51%<br>(0.36% - 0.63%) | 0.00%<br>(0.00% - 0.00%) | 0.00%<br>(0.00% - 0.00%) | 0.00%<br>(0.00% - 0.00%) | 0.00%<br>(0.00% - 0.00%) | 0.00%<br>(0.00% - 0.00%) | 0.00%<br>(0.00% - 0.00%) | 0.00%<br>(0.00% - 0.00%) | 0.00%<br>(0.00% - 0.00%) |
| <i>Utah</i>           | 0.62%<br>(0.49% - 0.72%) | 0.58%<br>(0.43% - 0.69%) | 0.52%<br>(0.39% - 0.64%) | 0.52%<br>(0.37% - 0.65%) | 0.00%<br>(0.00% - 0.00%) | 0.00%<br>(0.00% - 0.00%) | 0.00%<br>(0.00% - 0.00%) | 0.00%<br>(0.00% - 0.00%) | 0.00%<br>(0.00% - 0.00%) | 0.00%<br>(0.00% - 0.00%) | 0.00%<br>(0.00% - 0.00%) | 0.00%<br>(0.00% - 0.00%) |
|                       | 0.54%                    | 0.46%                    | 0.45%                    | 0.44%                    | 0.00%                    | 0.00%                    | 0.00%                    | 0.00%                    | 0.00%                    | 0.00%                    | 0.00%                    | 0.00%                    |

Table S8b. Estimated overall, severe, and extreme **wasting** prevalence (%) in children under 5 years, both sexes, in 1990, 2000, 2010, and 2020.

| Location               | Total           |                 |                 |                 | Severe          |                 |                 |                 | Extreme         |                 |                 |                 |
|------------------------|-----------------|-----------------|-----------------|-----------------|-----------------|-----------------|-----------------|-----------------|-----------------|-----------------|-----------------|-----------------|
|                        | 1990            | 2000            | 2010            | 2020            | 1990            | 2000            | 2010            | 2020            | 1990            | 2000            | 2010            | 2020            |
| Vermont                | (0.41% - 0.65%) | (0.29% - 0.60%) | (0.30% - 0.57%) | (0.31% - 0.57%) | (0.00% - 0.00%) | (0.00% - 0.00%) | (0.00% - 0.00%) | (0.00% - 0.00%) | (0.00% - 0.00%) | (0.00% - 0.00%) | (0.00% - 0.00%) | (0.00% - 0.00%) |
| Virginia               | 0.57%           | 0.49%           | 0.47%           | 0.46%           | 0.00%           | 0.00%           | 0.00%           | 0.00%           | 0.00%           | 0.00%           | 0.00%           | 0.00%           |
| Washington             | (0.43% - 0.68%) | (0.32% - 0.63%) | (0.32% - 0.59%) | (0.32% - 0.59%) | (0.00% - 0.00%) | (0.00% - 0.00%) | (0.00% - 0.00%) | (0.00% - 0.00%) | (0.00% - 0.00%) | (0.00% - 0.00%) | (0.00% - 0.00%) | (0.00% - 0.00%) |
| West Virginia          | 0.54%           | 0.47%           | 0.46%           | 0.43%           | 0.00%           | 0.00%           | 0.00%           | 0.00%           | 0.00%           | 0.00%           | 0.00%           | 0.00%           |
| Wisconsin              | (0.40% - 0.66%) | (0.30% - 0.60%) | (0.32% - 0.58%) | (0.31% - 0.56%) | (0.00% - 0.00%) | (0.00% - 0.00%) | (0.00% - 0.00%) | (0.00% - 0.00%) | (0.00% - 0.00%) | (0.00% - 0.00%) | (0.00% - 0.00%) | (0.00% - 0.00%) |
| Wyoming                | 0.64%           | 0.61%           | 0.62%           | 0.59%           | 0.00%           | 0.00%           | 0.00%           | 0.00%           | 0.00%           | 0.00%           | 0.00%           | 0.00%           |
| Greenland              | (0.55% - 0.73%) | (0.48% - 0.71%) | (0.51% - 0.74%) | (0.49% - 0.71%) | (0.00% - 0.00%) | (0.00% - 0.00%) | (0.00% - 0.00%) | (0.00% - 0.00%) | (0.00% - 0.00%) | (0.00% - 0.00%) | (0.00% - 0.00%) | (0.00% - 0.00%) |
| Southern Latin America | 0.51%           | 0.47%           | 0.47%           | 0.47%           | 0.00%           | 0.00%           | 0.00%           | 0.00%           | 0.00%           | 0.00%           | 0.00%           | 0.00%           |
| Argentina              | (0.35% - 0.63%) | (0.30% - 0.61%) | (0.33% - 0.59%) | (0.33% - 0.59%) | (0.00% - 0.00%) | (0.00% - 0.00%) | (0.00% - 0.00%) | (0.00% - 0.00%) | (0.00% - 0.00%) | (0.00% - 0.00%) | (0.00% - 0.00%) | (0.00% - 0.00%) |
| Chile                  | 0.58%           | 0.55%           | 0.51%           | 0.48%           | 0.00%           | 0.00%           | 0.00%           | 0.00%           | 0.00%           | 0.00%           | 0.00%           | 0.00%           |
| Uruguay                | (0.44% - 0.67%) | (0.41% - 0.66%) | (0.36% - 0.63%) | (0.33% - 0.61%) | (0.00% - 0.00%) | (0.00% - 0.00%) | (0.00% - 0.00%) | (0.00% - 0.00%) | (0.00% - 0.00%) | (0.00% - 0.00%) | (0.00% - 0.00%) | (0.00% - 0.00%) |
| Western Europe         | 1.09%           | 0.94%           | 0.86%           | 0.72%           | 0.00%           | 0.00%           | 0.00%           | 0.00%           | 0.00%           | 0.00%           | 0.00%           | 0.00%           |
| Monaco                 | (0.99% - 1.20%) | (0.85% - 1.05%) | (0.77% - 0.95%) | (0.60% - 0.83%) | (0.00% - 0.00%) | (0.00% - 0.00%) | (0.00% - 0.00%) | (0.00% - 0.00%) | (0.00% - 0.00%) | (0.00% - 0.00%) | (0.00% - 0.00%) | (0.00% - 0.00%) |
| San Marino             | 2.64%           | 1.91%           | 1.30%           | 1.09%           | 0.01%           | 0.00%           | 0.00%           | 0.00%           | 0.00%           | 0.00%           | 0.00%           | 0.00%           |
| Andorra                | (2.46% - 2.86%) | (1.79% - 2.03%) | (1.20% - 1.41%) | (0.99% - 1.20%) | (0.00% - 0.04%) | (0.00% - 0.00%) | (0.00% - 0.00%) | (0.00% - 0.00%) | (0.00% - 0.00%) | (0.00% - 0.00%) | (0.00% - 0.00%) | (0.00% - 0.00%) |
| Austria                | 3.18%           | 2.26%           | 1.50%           | 1.31%           | 0.02%           | 0.00%           | 0.00%           | 0.00%           | 0.00%           | 0.00%           | 0.00%           | 0.00%           |
| Belgium                | (2.91% - 3.51%) | (2.09% - 2.44%) | (1.36% - 1.66%) | (1.18% - 1.45%) | (0.00% - 0.05%) | (0.00% - 0.00%) | (0.00% - 0.00%) | (0.00% - 0.00%) | (0.00% - 0.00%) | (0.00% - 0.00%) | (0.00% - 0.00%) | (0.00% - 0.00%) |
| Cyprus                 | 1.25%           | 0.84%           | 0.57%           | 0.32%           | 0.00%           | 0.00%           | 0.00%           | 0.00%           | 0.00%           | 0.00%           | 0.00%           | 0.00%           |
| Denmark                | (1.13% - 1.38%) | (0.76% - 0.93%) | (0.43% - 0.66%) | (0.14% - 0.45%) | (0.00% - 0.00%) | (0.00% - 0.00%) | (0.00% - 0.00%) | (0.00% - 0.00%) | (0.00% - 0.00%) | (0.00% - 0.00%) | (0.00% - 0.00%) | (0.00% - 0.00%) |
| Finland                | 3.14%           | 2.40%           | 1.95%           | 1.62%           | 0.04%           | 0.00%           | 0.00%           | 0.00%           | 0.00%           | 0.00%           | 0.00%           | 0.00%           |
| France                 | (2.88% - 3.43%) | (2.18% - 2.62%) | (1.77% - 2.14%) | (1.46% - 1.78%) | (0.03% - 0.07%) | (0.00% - 0.01%) | (0.00% - 0.00%) | (0.00% - 0.00%) | (0.00% - 0.00%) | (0.00% - 0.00%) | (0.00% - 0.00%) | (0.00% - 0.00%) |
| Germany                | 1.36%           | 1.13%           | 1.01%           | 0.92%           | 0.03%           | 0.01%           | 0.00%           | 0.00%           | 0.00%           | 0.00%           | 0.00%           | 0.00%           |
| Greece                 | (1.32% - 1.41%) | (1.09% - 1.18%) | (0.97% - 1.05%) | (0.88% - 0.97%) | (0.03% - 0.04%) | (0.01% - 0.01%) | (0.00% - 0.01%) | (0.00% - 0.00%) | (0.00% - 0.00%) | (0.00% - 0.00%) | (0.00% - 0.00%) | (0.00% - 0.00%) |
| Iceland                | 0.95%           | 0.81%           | 0.75%           | 0.70%           | 0.01%           | 0.00%           | 0.00%           | 0.00%           | 0.00%           | 0.00%           | 0.00%           | 0.00%           |
|                        | (0.80% - 1.08%) | (0.67% - 0.97%) | (0.61% - 0.89%) | (0.57% - 0.83%) | (0.00% - 0.02%) | (0.00% - 0.00%) | (0.00% - 0.00%) | (0.00% - 0.00%) | (0.00% - 0.00%) | (0.00% - 0.00%) | (0.00% - 0.00%) | (0.00% - 0.00%) |
|                        | 1.04%           | 0.93%           | 0.87%           | 0.90%           | 0.01%           | 0.00%           | 0.00%           | 0.00%           | 0.00%           | 0.00%           | 0.00%           | 0.00%           |
|                        | (0.92% - 1.14%) | (0.76% - 1.09%) | (0.71% - 1.00%) | (0.74% - 1.03%) | (0.00% - 0.03%) | (0.00% - 0.01%) | (0.00% - 0.00%) | (0.00% - 0.00%) | (0.00% - 0.00%) | (0.00% - 0.00%) | (0.00% - 0.00%) | (0.00% - 0.00%) |
|                        | 1.08%           | 0.91%           | 0.77%           | 0.78%           | 0.02%           | 0.00%           | 0.00%           | 0.00%           | 0.00%           | 0.00%           | 0.00%           | 0.00%           |
|                        | (0.97% - 1.19%) | (0.74% - 1.04%) | (0.62% - 0.92%) | (0.63% - 0.92%) | (0.01% - 0.03%) | (0.00% - 0.01%) | (0.00% - 0.00%) | (0.00% - 0.00%) | (0.00% - 0.00%) | (0.00% - 0.00%) | (0.00% - 0.00%) | (0.00% - 0.00%) |
|                        | 1.47%           | 1.18%           | 1.02%           | 0.92%           | 0.04%           | 0.01%           | 0.00%           | 0.00%           | 0.00%           | 0.00%           | 0.00%           | 0.00%           |
|                        | (1.33% - 1.60%) | (1.07% - 1.31%) | (0.89% - 1.15%) | (0.74% - 1.06%) | (0.02% - 0.06%) | (0.00% - 0.02%) | (0.00% - 0.01%) | (0.00% - 0.01%) | (0.00% - 0.00%) | (0.00% - 0.00%) | (0.00% - 0.00%) | (0.00% - 0.00%) |
|                        | 1.37%           | 1.15%           | 0.95%           | 0.86%           | 0.03%           | 0.01%           | 0.00%           | 0.00%           | 0.00%           | 0.00%           | 0.00%           | 0.00%           |
|                        | (1.25% - 1.50%) | (1.04% - 1.28%) | (0.79% - 1.07%) | (0.70% - 1.00%) | (0.02% - 0.05%) | (0.00% - 0.02%) | (0.00% - 0.01%) | (0.00% - 0.00%) | (0.00% - 0.00%) | (0.00% - 0.00%) | (0.00% - 0.00%) | (0.00% - 0.00%) |
|                        | 1.93%           | 1.51%           | 1.32%           | 1.24%           | 0.09%           | 0.02%           | 0.01%           | 0.01%           | 0.00%           | 0.00%           | 0.00%           | 0.00%           |
|                        | (1.75% - 2.10%) | (1.37% - 1.66%) | (1.20% - 1.45%) | (1.12% - 1.37%) | (0.06% - 0.12%) | (0.01% - 0.04%) | (0.00% - 0.02%) | (0.00% - 0.02%) | (0.00% - 0.00%) | (0.00% - 0.00%) | (0.00% - 0.00%) | (0.00% - 0.00%) |
|                        | 1.49%           | 1.21%           | 1.11%           | 1.01%           | 0.04%           | 0.01%           | 0.00%           | 0.00%           | 0.00%           | 0.00%           | 0.00%           | 0.00%           |
|                        | (1.36% - 1.64%) | (1.10% - 1.35%) | (1.00% - 1.22%) | (0.88% - 1.14%) | (0.03% - 0.07%) | (0.00% - 0.02%) | (0.00% - 0.01%) | (0.00% - 0.01%) | (0.00% - 0.00%) | (0.00% - 0.00%) | (0.00% - 0.00%) | (0.00% - 0.00%) |
|                        | 1.47%           | 1.26%           | 1.11%           | 1.05%           | 0.04%           | 0.01%           | 0.00%           | 0.00%           | 0.00%           | 0.00%           | 0.00%           | 0.00%           |
|                        | (1.35% - 1.60%) | (1.13% - 1.39%) | (1.00% - 1.23%) | (0.94% - 1.18%) | (0.02% - 0.07%) | (0.00% - 0.02%) | (0.00% - 0.01%) | (0.00% - 0.01%) | (0.00% - 0.00%) | (0.00% - 0.00%) | (0.00% - 0.00%) | (0.00% - 0.00%) |
|                        | 1.40%           | 1.15%           | 1.01%           | 0.91%           | 0.04%           | 0.01%           | 0.00%           | 0.00%           | 0.00%           | 0.00%           | 0.00%           | 0.00%           |
|                        | (1.27% - 1.54%) | (1.04% - 1.28%) | (0.90% - 1.12%) | (0.75% - 1.05%) | (0.02% - 0.06%) | (0.00% - 0.02%) | (0.00% - 0.01%) | (0.00% - 0.01%) | (0.00% - 0.00%) | (0.00% - 0.00%) | (0.00% - 0.00%) | (0.00% - 0.00%) |
|                        | 1.22%           | 0.91%           | 0.79%           | 0.74%           | 0.02%           | 0.01%           | 0.00%           | 0.00%           | 0.00%           | 0.00%           | 0.00%           | 0.00%           |
|                        | (1.11% - 1.33%) | (0.77% - 1.03%) | (0.69% - 0.93%) | (0.63% - 0.88%) | (0.01% - 0.03%) | (0.00% - 0.01%) | (0.00% - 0.01%) | (0.00% - 0.01%) | (0.00% - 0.00%) | (0.00% - 0.00%) | (0.00% - 0.00%) | (0.00% - 0.00%) |
|                        | 0.99%           | 0.77%           | 0.70%           | 0.70%           | 0.00%           | 0.00%           | 0.00%           | 0.00%           | 0.00%           | 0.00%           | 0.00%           | 0.00%           |
|                        | (0.89% - 1.11%) | (0.68% - 0.87%) | (0.56% - 0.80%) | (0.56% - 0.81%) | (0.00% - 0.00%) | (0.00% - 0.00%) | (0.00% - 0.00%) | (0.00% - 0.00%) | (0.00% - 0.00%) | (0.00% - 0.00%) | (0.00% - 0.00%) | (0.00% - 0.00%) |
|                        | 1.18%           | 1.10%           | 1.02%           | 0.95%           | 0.02%           | 0.00%           | 0.00%           | 0.00%           | 0.00%           | 0.00%           | 0.00%           | 0.00%           |
|                        | (1.07% - 1.31%) | (0.99% - 1.22%) | (0.90% - 1.14%) | (0.79% - 1.07%) | (0.01% - 0.04%) | (0.00% - 0.01%) | (0.00% - 0.01%) | (0.00% - 0.01%) | (0.00% - 0.00%) | (0.00% - 0.00%) | (0.00% - 0.00%) | (0.00% - 0.00%) |



Table S8b. Estimated overall, severe, and extreme wasting prevalence (%) in children under 5 years, both sexes, in 1990, 2000, 2010, and 2020.

| Location                      | Total           |                 |                 |                 | Severe          |                 |                 |                 | Extreme         |                 |                 |                 |
|-------------------------------|-----------------|-----------------|-----------------|-----------------|-----------------|-----------------|-----------------|-----------------|-----------------|-----------------|-----------------|-----------------|
|                               | 1990            | 2000            | 2010            | 2020            | 1990            | 2000            | 2010            | 2020            | 1990            | 2000            | 2010            | 2020            |
| Ireland                       | 1.41%           | 1.20%           | 0.96%           | 0.81%           | 0.04%           | 0.01%           | 0.00%           | 0.00%           | 0.00%           | 0.00%           | 0.00%           | 0.00%           |
|                               | (1.28% - 1.55%) | (1.08% - 1.33%) | (0.80% - 1.10%) | (0.67% - 0.95%) | (0.02% - 0.06%) | (0.00% - 0.02%) | (0.00% - 0.01%) | (0.00% - 0.00%) | (0.00% - 0.00%) | (0.00% - 0.00%) | (0.00% - 0.00%) | (0.00% - 0.00%) |
| Israel                        | 1.32%           | 1.10%           | 0.95%           | 0.86%           | 0.03%           | 0.00%           | 0.00%           | 0.00%           | 0.00%           | 0.00%           | 0.00%           | 0.00%           |
|                               | (1.20% - 1.45%) | (0.98% - 1.24%) | (0.78% - 1.08%) | (0.71% - 1.00%) | (0.02% - 0.05%) | (0.00% - 0.02%) | (0.00% - 0.01%) | (0.00% - 0.00%) | (0.00% - 0.00%) | (0.00% - 0.00%) | (0.00% - 0.00%) | (0.00% - 0.00%) |
| Italy                         | 1.45%           | 1.11%           | 0.91%           | 0.86%           | 0.04%           | 0.01%           | 0.00%           | 0.00%           | 0.00%           | 0.00%           | 0.00%           | 0.00%           |
|                               | (1.33% - 1.59%) | (0.99% - 1.23%) | (0.80% - 1.03%) | (0.75% - 0.98%) | (0.03% - 0.06%) | (0.00% - 0.01%) | (0.00% - 0.01%) | (0.00% - 0.00%) | (0.00% - 0.00%) | (0.00% - 0.00%) | (0.00% - 0.00%) | (0.00% - 0.00%) |
| Piemonte                      | 1.35%           | 1.07%           | 0.88%           | 0.83%           | 0.04%           | 0.00%           | 0.00%           | 0.00%           | 0.00%           | 0.00%           | 0.00%           | 0.00%           |
|                               | (1.18% - 1.53%) | (0.90% - 1.24%) | (0.70% - 1.05%) | (0.66% - 1.00%) | (0.01% - 0.06%) | (0.00% - 0.02%) | (0.00% - 0.01%) | (0.00% - 0.01%) | (0.00% - 0.00%) | (0.00% - 0.00%) | (0.00% - 0.00%) | (0.00% - 0.00%) |
| Valle d'Aosta                 | 1.38%           | 1.08%           | 0.89%           | 0.83%           | 0.04%           | 0.01%           | 0.00%           | 0.00%           | 0.00%           | 0.00%           | 0.00%           | 0.00%           |
|                               | (1.21% - 1.57%) | (0.90% - 1.26%) | (0.70% - 1.08%) | (0.65% - 1.00%) | (0.02% - 0.07%) | (0.00% - 0.02%) | (0.00% - 0.01%) | (0.00% - 0.01%) | (0.00% - 0.00%) | (0.00% - 0.00%) | (0.00% - 0.00%) | (0.00% - 0.00%) |
| Liguria                       | 1.34%           | 1.05%           | 0.87%           | 0.83%           | 0.03%           | 0.00%           | 0.00%           | 0.00%           | 0.00%           | 0.00%           | 0.00%           | 0.00%           |
|                               | (1.17% - 1.53%) | (0.87% - 1.23%) | (0.69% - 1.07%) | (0.66% - 1.02%) | (0.01% - 0.06%) | (0.00% - 0.02%) | (0.00% - 0.01%) | (0.00% - 0.01%) | (0.00% - 0.00%) | (0.00% - 0.00%) | (0.00% - 0.00%) | (0.00% - 0.00%) |
| Lombardia                     | 1.27%           | 1.00%           | 0.83%           | 0.79%           | 0.03%           | 0.00%           | 0.00%           | 0.00%           | 0.00%           | 0.00%           | 0.00%           | 0.00%           |
|                               | (1.11% - 1.44%) | (0.82% - 1.18%) | (0.66% - 1.00%) | (0.61% - 0.96%) | (0.01% - 0.05%) | (0.00% - 0.01%) | (0.00% - 0.01%) | (0.00% - 0.01%) | (0.00% - 0.00%) | (0.00% - 0.00%) | (0.00% - 0.00%) | (0.00% - 0.00%) |
| Provincia autonoma di Bolzano | 1.29%           | 0.99%           | 0.83%           | 0.78%           | 0.03%           | 0.00%           | 0.00%           | 0.00%           | 0.00%           | 0.00%           | 0.00%           | 0.00%           |
|                               | (1.13% - 1.49%) | (0.80% - 1.19%) | (0.65% - 1.02%) | (0.62% - 0.96%) | (0.01% - 0.06%) | (0.00% - 0.02%) | (0.00% - 0.01%) | (0.00% - 0.01%) | (0.00% - 0.00%) | (0.00% - 0.00%) | (0.00% - 0.00%) | (0.00% - 0.00%) |
| Provincia autonoma di Trento  | 1.26%           | 1.00%           | 0.85%           | 0.80%           | 0.03%           | 0.00%           | 0.00%           | 0.00%           | 0.00%           | 0.00%           | 0.00%           | 0.00%           |
|                               | (1.10% - 1.45%) | (0.79% - 1.18%) | (0.66% - 1.02%) | (0.62% - 0.97%) | (0.01% - 0.05%) | (0.00% - 0.02%) | (0.00% - 0.01%) | (0.00% - 0.01%) | (0.00% - 0.00%) | (0.00% - 0.00%) | (0.00% - 0.00%) | (0.00% - 0.00%) |
| Veneto                        | 1.33%           | 1.04%           | 0.87%           | 0.83%           | 0.03%           | 0.00%           | 0.00%           | 0.00%           | 0.00%           | 0.00%           | 0.00%           | 0.00%           |
|                               | (1.17% - 1.53%) | (0.86% - 1.22%) | (0.69% - 1.04%) | (0.65% - 1.00%) | (0.01% - 0.06%) | (0.00% - 0.02%) | (0.00% - 0.01%) | (0.00% - 0.01%) | (0.00% - 0.00%) | (0.00% - 0.00%) | (0.00% - 0.00%) | (0.00% - 0.00%) |
| Friuli-Venezia Giulia         | 1.35%           | 1.05%           | 0.88%           | 0.82%           | 0.03%           | 0.00%           | 0.00%           | 0.00%           | 0.00%           | 0.00%           | 0.00%           | 0.00%           |
|                               | (1.17% - 1.53%) | (0.88% - 1.23%) | (0.69% - 1.06%) | (0.64% - 1.00%) | (0.01% - 0.06%) | (0.00% - 0.02%) | (0.00% - 0.01%) | (0.00% - 0.01%) | (0.00% - 0.00%) | (0.00% - 0.00%) | (0.00% - 0.00%) | (0.00% - 0.00%) |
| Emilia-Romagna                | 1.39%           | 1.02%           | 0.85%           | 0.80%           | 0.04%           | 0.00%           | 0.00%           | 0.00%           | 0.00%           | 0.00%           | 0.00%           | 0.00%           |
|                               | (1.22% - 1.57%) | (0.84% - 1.22%) | (0.67% - 1.02%) | (0.62% - 0.98%) | (0.01% - 0.07%) | (0.00% - 0.02%) | (0.00% - 0.01%) | (0.00% - 0.01%) | (0.00% - 0.00%) | (0.00% - 0.00%) | (0.00% - 0.00%) | (0.00% - 0.00%) |
| Toscana                       | 1.33%           | 1.05%           | 0.87%           | 0.82%           | 0.03%           | 0.00%           | 0.00%           | 0.00%           | 0.00%           | 0.00%           | 0.00%           | 0.00%           |
|                               | (1.17% - 1.51%) | (0.87% - 1.22%) | (0.69% - 1.05%) | (0.64% - 0.99%) | (0.01% - 0.06%) | (0.00% - 0.02%) | (0.00% - 0.01%) | (0.00% - 0.01%) | (0.00% - 0.00%) | (0.00% - 0.00%) | (0.00% - 0.00%) | (0.00% - 0.00%) |
| Umbria                        | 1.36%           | 1.07%           | 0.90%           | 0.86%           | 0.04%           | 0.01%           | 0.00%           | 0.00%           | 0.00%           | 0.00%           | 0.00%           | 0.00%           |
|                               | (1.19% - 1.54%) | (0.91% - 1.25%) | (0.71% - 1.10%) | (0.68% - 1.06%) | (0.01% - 0.06%) | (0.00% - 0.02%) | (0.00% - 0.01%) | (0.00% - 0.01%) | (0.00% - 0.00%) | (0.00% - 0.00%) | (0.00% - 0.00%) | (0.00% - 0.00%) |
| Marche                        | 1.39%           | 1.07%           | 0.90%           | 0.85%           | 0.04%           | 0.01%           | 0.00%           | 0.00%           | 0.00%           | 0.00%           | 0.00%           | 0.00%           |
|                               | (1.22% - 1.58%) | (0.88% - 1.24%) | (0.72% - 1.09%) | (0.66% - 1.02%) | (0.01% - 0.07%) | (0.00% - 0.02%) | (0.00% - 0.01%) | (0.00% - 0.01%) | (0.00% - 0.00%) | (0.00% - 0.00%) | (0.00% - 0.00%) | (0.00% - 0.00%) |
| Lazio                         | 1.30%           | 1.02%           | 0.85%           | 0.80%           | 0.03%           | 0.00%           | 0.00%           | 0.00%           | 0.00%           | 0.00%           | 0.00%           | 0.00%           |
|                               | (1.14% - 1.49%) | (0.83% - 1.19%) | (0.69% - 1.02%) | (0.64% - 0.97%) | (0.01% - 0.06%) | (0.00% - 0.02%) | (0.00% - 0.01%) | (0.00% - 0.01%) | (0.00% - 0.00%) | (0.00% - 0.00%) | (0.00% - 0.00%) | (0.00% - 0.00%) |
| Abruzzo                       | 1.38%           | 1.08%           | 0.92%           | 0.87%           | 0.04%           | 0.01%           | 0.00%           | 0.00%           | 0.00%           | 0.00%           | 0.00%           | 0.00%           |
|                               | (1.20% - 1.57%) | (0.92% - 1.26%) | (0.73% - 1.09%) | (0.68% - 1.07%) | (0.02% - 0.06%) | (0.00% - 0.02%) | (0.00% - 0.01%) | (0.00% - 0.01%) | (0.00% - 0.00%) | (0.00% - 0.00%) | (0.00% - 0.00%) | (0.00% - 0.00%) |
| Molise                        | 1.49%           | 1.15%           | 0.98%           | 0.94%           | 0.05%           | 0.01%           | 0.00%           | 0.00%           | 0.00%           | 0.00%           | 0.00%           | 0.00%           |
|                               | (1.30% - 1.71%) | (0.99% - 1.32%) | (0.79% - 1.16%) | (0.75% - 1.13%) | (0.02% - 0.08%) | (0.00% - 0.02%) | (0.00% - 0.01%) | (0.00% - 0.01%) | (0.00% - 0.00%) | (0.00% - 0.00%) | (0.00% - 0.00%) | (0.00% - 0.00%) |
| Campania                      | 1.64%           | 1.24%           | 1.03%           | 0.98%           | 0.06%           | 0.01%           | 0.00%           | 0.00%           | 0.00%           | 0.00%           | 0.00%           | 0.00%           |
|                               | (1.46% - 1.85%) | (1.08% - 1.41%) | (0.85% - 1.20%) | (0.79% - 1.18%) | (0.03% - 0.10%) | (0.00% - 0.03%) | (0.00% - 0.01%) | (0.00% - 0.01%) | (0.00% - 0.00%) | (0.00% - 0.00%) | (0.00% - 0.00%) | (0.00% - 0.00%) |
| Puglia                        | 1.61%           | 1.22%           | 1.02%           | 0.97%           | 0.06%           | 0.01%           | 0.00%           | 0.00%           | 0.00%           | 0.00%           | 0.00%           | 0.00%           |
|                               | (1.41% - 1.81%) | (1.06% - 1.39%) | (0.84% - 1.18%) | (0.79% - 1.15%) | (0.03% - 0.09%) | (0.00% - 0.03%) | (0.00% - 0.01%) | (0.00% - 0.01%) | (0.00% - 0.00%) | (0.00% - 0.00%) | (0.00% - 0.00%) | (0.00% - 0.00%) |
| Basilicata                    | 1.53%           | 1.18%           | 1.00%           | 0.94%           | 0.05%           | 0.01%           | 0.00%           | 0.00%           | 0.00%           | 0.00%           | 0.00%           | 0.00%           |
|                               | (1.34% - 1.75%) | (1.03% - 1.37%) | (0.82% - 1.15%) | (0.75% - 1.12%) | (0.02% - 0.08%) | (0.00% - 0.03%) | (0.00% - 0.01%) | (0.00% - 0.01%) | (0.00% - 0.00%) | (0.00% - 0.00%) | (0.00% - 0.00%) | (0.00% - 0.00%) |
| Calabria                      | 1.58%           | 1.21%           | 1.02%           | 0.97%           | 0.05%           | 0.01%           | 0.00%           | 0.00%           | 0.00%           | 0.00%           | 0.00%           | 0.00%           |
|                               | (1.39% - 1.79%) | (1.05% - 1.39%) | (0.84% - 1.20%) | (0.80% - 1.17%) | (0.03% - 0.09%) | (0.00% - 0.02%) | (0.00% - 0.01%) | (0.00% - 0.01%) | (0.00% - 0.00%) | (0.00% - 0.00%) | (0.00% - 0.00%) | (0.00% - 0.00%) |
| Sicilia                       | 1.66%           | 1.24%           | 1.03%           | 0.99%           | 0.06%           | 0.01%           | 0.00%           | 0.00%           | 0.00%           | 0.00%           | 0.00%           | 0.00%           |
|                               | (1.47% - 1.88%) | (1.08% - 1.41%) | (0.86% - 1.22%) | (0.81% - 1.16%) | (0.03% - 0.10%) | (0.00% - 0.03%) | (0.00% - 0.01%) | (0.00% - 0.01%) | (0.00% - 0.00%) | (0.00% - 0.00%) | (0.00% - 0.00%) | (0.00% - 0.00%) |

Table S8b. Estimated overall, severe, and extreme wasting prevalence (%) in children under 5 years, both sexes, in 1990, 2000, 2010, and 2020.

| Location                        | Total                    |                          |                          |                          | Severe                   |                          |                          |                          | Extreme                  |                          |                          |                          |
|---------------------------------|--------------------------|--------------------------|--------------------------|--------------------------|--------------------------|--------------------------|--------------------------|--------------------------|--------------------------|--------------------------|--------------------------|--------------------------|
|                                 | 1990                     | 2000                     | 2010                     | 2020                     | 1990                     | 2000                     | 2010                     | 2020                     | 1990                     | 2000                     | 2010                     | 2020                     |
| <i>Sardegna</i>                 | 1.49%<br>(1.30% - 1.71%) | 1.18%<br>(1.02% - 1.37%) | 0.98%<br>(0.80% - 1.15%) | 0.93%<br>(0.73% - 1.09%) | 0.05%<br>(0.02% - 0.08%) | 0.01%<br>(0.00% - 0.02%) | 0.00%<br>(0.00% - 0.01%) | 0.00%<br>(0.00% - 0.01%) | 0.00%<br>(0.00% - 0.00%) | 0.00%<br>(0.00% - 0.00%) | 0.00%<br>(0.00% - 0.00%) | 0.00%<br>(0.00% - 0.00%) |
| <i>Luxembourg</i>               | 1.55%<br>(1.41% - 1.69%) | 1.31%<br>(1.18% - 1.44%) | 1.16%<br>(1.05% - 1.28%) | 1.06%<br>(0.94% - 1.18%) | 0.05%<br>(0.03% - 0.07%) | 0.01%<br>(0.00% - 0.03%) | 0.01%<br>(0.00% - 0.02%) | 0.00%<br>(0.00% - 0.01%) | 0.00%<br>(0.00% - 0.00%) | 0.00%<br>(0.00% - 0.00%) | 0.00%<br>(0.00% - 0.00%) | 0.00%<br>(0.00% - 0.00%) |
| <i>Malta</i>                    | 1.68%<br>(1.54% - 1.85%) | 1.37%<br>(1.23% - 1.50%) | 1.24%<br>(1.12% - 1.36%) | 1.05%<br>(0.95% - 1.17%) | 0.06%<br>(0.04% - 0.09%) | 0.01%<br>(0.00% - 0.03%) | 0.01%<br>(0.00% - 0.02%) | 0.00%<br>(0.00% - 0.01%) | 0.00%<br>(0.00% - 0.00%) | 0.00%<br>(0.00% - 0.00%) | 0.00%<br>(0.00% - 0.00%) | 0.00%<br>(0.00% - 0.00%) |
| <i>Netherlands</i>              | 1.21%<br>(1.06% - 1.33%) | 1.08%<br>(0.93% - 1.21%) | 0.93%<br>(0.80% - 1.07%) | 0.88%<br>(0.70% - 1.03%) | 0.08%<br>(0.06% - 0.11%) | 0.06%<br>(0.04% - 0.08%) | 0.04%<br>(0.02% - 0.06%) | 0.04%<br>(0.02% - 0.05%) | 0.00%<br>(0.00% - 0.00%) | 0.00%<br>(0.00% - 0.00%) | 0.00%<br>(0.00% - 0.00%) | 0.00%<br>(0.00% - 0.00%) |
| <i>Norway</i>                   | 1.32%<br>(1.21% - 1.45%) | 1.09%<br>(0.98% - 1.21%) | 0.98%<br>(0.87% - 1.09%) | 0.90%<br>(0.78% - 1.01%) | 0.03%<br>(0.02% - 0.05%) | 0.01%<br>(0.00% - 0.01%) | 0.00%<br>(0.00% - 0.01%) | 0.00%<br>(0.00% - 0.01%) | 0.00%<br>(0.00% - 0.00%) | 0.00%<br>(0.00% - 0.00%) | 0.00%<br>(0.00% - 0.00%) | 0.00%<br>(0.00% - 0.00%) |
| <i>Portugal</i>                 | 1.86%<br>(1.70% - 2.04%) | 1.45%<br>(1.32% - 1.61%) | 1.21%<br>(1.09% - 1.32%) | 1.10%<br>(0.99% - 1.23%) | 0.08%<br>(0.05% - 0.11%) | 0.02%<br>(0.01% - 0.03%) | 0.01%<br>(0.00% - 0.02%) | 0.00%<br>(0.00% - 0.01%) | 0.00%<br>(0.00% - 0.00%) | 0.00%<br>(0.00% - 0.00%) | 0.00%<br>(0.00% - 0.00%) | 0.00%<br>(0.00% - 0.00%) |
| <i>Spain</i>                    | 1.34%<br>(1.19% - 1.51%) | 1.48%<br>(1.32% - 1.66%) | 1.43%<br>(1.27% - 1.62%) | 1.37%<br>(1.21% - 1.54%) | 0.00%<br>(0.00% - 0.00%) | 0.00%<br>(0.00% - 0.00%) | 0.00%<br>(0.00% - 0.00%) | 0.00%<br>(0.00% - 0.00%) | 0.00%<br>(0.00% - 0.00%) | 0.00%<br>(0.00% - 0.00%) | 0.00%<br>(0.00% - 0.00%) | 0.00%<br>(0.00% - 0.00%) |
| <i>Sweden</i>                   | 1.30%<br>(1.19% - 1.43%) | 1.10%<br>(0.99% - 1.22%) | 0.97%<br>(0.83% - 1.10%) | 0.90%<br>(0.75% - 1.02%) | 0.03%<br>(0.02% - 0.05%) | 0.01%<br>(0.00% - 0.02%) | 0.00%<br>(0.00% - 0.01%) | 0.00%<br>(0.00% - 0.01%) | 0.00%<br>(0.00% - 0.00%) | 0.00%<br>(0.00% - 0.00%) | 0.00%<br>(0.00% - 0.00%) | 0.00%<br>(0.00% - 0.00%) |
| <i>Sweden except Stockholm</i>  | 1.29%<br>(1.17% - 1.42%) | 1.09%<br>(0.98% - 1.23%) | 0.96%<br>(0.81% - 1.11%) | 0.89%<br>(0.72% - 1.01%) | 0.03%<br>(0.01% - 0.05%) | 0.00%<br>(0.00% - 0.02%) | 0.00%<br>(0.00% - 0.01%) | 0.00%<br>(0.00% - 0.00%) | 0.00%<br>(0.00% - 0.00%) | 0.00%<br>(0.00% - 0.00%) | 0.00%<br>(0.00% - 0.00%) | 0.00%<br>(0.00% - 0.00%) |
| <i>Stockholm</i>                | 1.35%<br>(1.17% - 1.55%) | 1.15%<br>(0.97% - 1.33%) | 0.99%<br>(0.81% - 1.16%) | 0.93%<br>(0.73% - 1.10%) | 0.04%<br>(0.01% - 0.07%) | 0.01%<br>(0.00% - 0.02%) | 0.00%<br>(0.00% - 0.01%) | 0.00%<br>(0.00% - 0.01%) | 0.00%<br>(0.00% - 0.00%) | 0.00%<br>(0.00% - 0.00%) | 0.00%<br>(0.00% - 0.00%) | 0.00%<br>(0.00% - 0.00%) |
| <i>Switzerland</i>              | 1.16%<br>(1.05% - 1.28%) | 1.04%<br>(0.93% - 1.16%) | 0.92%<br>(0.76% - 1.04%) | 0.86%<br>(0.70% - 0.99%) | 0.02%<br>(0.01% - 0.04%) | 0.00%<br>(0.00% - 0.01%) | 0.00%<br>(0.00% - 0.01%) | 0.00%<br>(0.00% - 0.00%) | 0.00%<br>(0.00% - 0.00%) | 0.00%<br>(0.00% - 0.00%) | 0.00%<br>(0.00% - 0.00%) | 0.00%<br>(0.00% - 0.00%) |
| <i>United Kingdom</i>           | 1.46%<br>(1.33% - 1.60%) | 1.19%<br>(1.08% - 1.32%) | 1.06%<br>(0.95% - 1.17%) | 0.98%<br>(0.87% - 1.08%) | 0.04%<br>(0.03% - 0.07%) | 0.01%<br>(0.00% - 0.02%) | 0.00%<br>(0.00% - 0.01%) | 0.00%<br>(0.00% - 0.01%) | 0.00%<br>(0.00% - 0.00%) | 0.00%<br>(0.00% - 0.00%) | 0.00%<br>(0.00% - 0.00%) | 0.00%<br>(0.00% - 0.00%) |
| <i>Northern Ireland</i>         | 1.54%<br>(1.31% - 1.79%) | 1.22%<br>(1.03% - 1.44%) | 1.12%<br>(0.94% - 1.32%) | 1.02%<br>(0.81% - 1.23%) | 0.05%<br>(0.02% - 0.09%) | 0.01%<br>(0.00% - 0.03%) | 0.01%<br>(0.00% - 0.02%) | 0.00%<br>(0.00% - 0.02%) | 0.00%<br>(0.00% - 0.00%) | 0.00%<br>(0.00% - 0.00%) | 0.00%<br>(0.00% - 0.00%) | 0.00%<br>(0.00% - 0.00%) |
| <i>Scotland</i>                 | 1.53%<br>(1.31% - 1.76%) | 1.23%<br>(1.04% - 1.43%) | 1.10%<br>(0.91% - 1.30%) | 1.02%<br>(0.83% - 1.20%) | 0.05%<br>(0.02% - 0.09%) | 0.01%<br>(0.00% - 0.03%) | 0.01%<br>(0.00% - 0.02%) | 0.00%<br>(0.00% - 0.02%) | 0.00%<br>(0.00% - 0.00%) | 0.00%<br>(0.00% - 0.00%) | 0.00%<br>(0.00% - 0.00%) | 0.00%<br>(0.00% - 0.00%) |
| <i>Wales</i>                    | 1.58%<br>(1.35% - 1.84%) | 1.27%<br>(1.07% - 1.52%) | 1.16%<br>(0.96% - 1.35%) | 1.05%<br>(0.86% - 1.25%) | 0.05%<br>(0.02% - 0.10%) | 0.01%<br>(0.00% - 0.03%) | 0.01%<br>(0.00% - 0.03%) | 0.00%<br>(0.00% - 0.02%) | 0.00%<br>(0.00% - 0.00%) | 0.00%<br>(0.00% - 0.00%) | 0.00%<br>(0.00% - 0.00%) | 0.00%<br>(0.00% - 0.00%) |
| <i>England</i>                  | 1.44%<br>(1.31% - 1.58%) | 1.18%<br>(1.07% - 1.31%) | 1.05%<br>(0.94% - 1.16%) | 0.97%<br>(0.86% - 1.08%) | 0.04%<br>(0.03% - 0.06%) | 0.01%<br>(0.00% - 0.02%) | 0.00%<br>(0.00% - 0.01%) | 0.00%<br>(0.00% - 0.01%) | 0.00%<br>(0.00% - 0.00%) | 0.00%<br>(0.00% - 0.00%) | 0.00%<br>(0.00% - 0.00%) | 0.00%<br>(0.00% - 0.00%) |
| <i>North East England</i>       | 1.57%<br>(1.36% - 1.79%) | 1.26%<br>(1.10% - 1.46%) | 1.10%<br>(0.94% - 1.27%) | 1.02%<br>(0.87% - 1.17%) | 0.05%<br>(0.03% - 0.09%) | 0.01%<br>(0.00% - 0.03%) | 0.01%<br>(0.00% - 0.02%) | 0.00%<br>(0.00% - 0.01%) | 0.00%<br>(0.00% - 0.00%) | 0.00%<br>(0.00% - 0.00%) | 0.00%<br>(0.00% - 0.00%) | 0.00%<br>(0.00% - 0.00%) |
| <i>North West England</i>       | 1.47%<br>(1.29% - 1.66%) | 1.22%<br>(1.06% - 1.38%) | 1.09%<br>(0.95% - 1.24%) | 1.01%<br>(0.86% - 1.15%) | 0.05%<br>(0.02% - 0.08%) | 0.01%<br>(0.00% - 0.03%) | 0.01%<br>(0.00% - 0.02%) | 0.00%<br>(0.00% - 0.01%) | 0.00%<br>(0.00% - 0.00%) | 0.00%<br>(0.00% - 0.00%) | 0.00%<br>(0.00% - 0.00%) | 0.00%<br>(0.00% - 0.00%) |
| <i>Yorkshire and the Humber</i> | 1.48%<br>(1.30% - 1.68%) | 1.22%<br>(1.06% - 1.39%) | 1.09%<br>(0.94% - 1.25%) | 1.01%<br>(0.85% - 1.17%) | 0.05%<br>(0.02% - 0.08%) | 0.01%<br>(0.00% - 0.03%) | 0.01%<br>(0.00% - 0.02%) | 0.00%<br>(0.00% - 0.01%) | 0.00%<br>(0.00% - 0.00%) | 0.00%<br>(0.00% - 0.00%) | 0.00%<br>(0.00% - 0.00%) | 0.00%<br>(0.00% - 0.00%) |
| <i>East Midlands</i>            | 1.45%<br>(1.26% - 1.65%) | 1.19%<br>(1.03% - 1.36%) | 1.07%<br>(0.91% - 1.23%) | 0.99%<br>(0.83% - 1.15%) | 0.04%<br>(0.02% - 0.08%) | 0.01%<br>(0.00% - 0.02%) | 0.01%<br>(0.00% - 0.02%) | 0.00%<br>(0.00% - 0.01%) | 0.00%<br>(0.00% - 0.00%) | 0.00%<br>(0.00% - 0.00%) | 0.00%<br>(0.00% - 0.00%) | 0.00%<br>(0.00% - 0.00%) |
| <i>West Midlands</i>            | 1.55%<br>(1.37% - 1.75%) | 1.27%<br>(1.11% - 1.45%) | 1.11%<br>(0.95% - 1.28%) | 1.03%<br>(0.87% - 1.19%) | 0.05%<br>(0.03% - 0.08%) | 0.01%<br>(0.00% - 0.03%) | 0.01%<br>(0.00% - 0.02%) | 0.00%<br>(0.00% - 0.02%) | 0.00%<br>(0.00% - 0.00%) | 0.00%<br>(0.00% - 0.00%) | 0.00%<br>(0.00% - 0.00%) | 0.00%<br>(0.00% - 0.00%) |
| <i>East of England</i>          | 1.36%<br>(1.19% - 1.55%) | 1.12%<br>(0.97% - 1.29%) | 1.01%<br>(0.85% - 1.16%) | 0.93%<br>(0.78% - 1.09%) | 0.04%<br>(0.02% - 0.06%) | 0.01%<br>(0.00% - 0.02%) | 0.00%<br>(0.00% - 0.02%) | 0.00%<br>(0.00% - 0.01%) | 0.00%<br>(0.00% - 0.00%) | 0.00%<br>(0.00% - 0.00%) | 0.00%<br>(0.00% - 0.00%) | 0.00%<br>(0.00% - 0.00%) |
| <i>Greater London</i>           | 1.41%<br>(1.26% - 1.58%) | 1.17%<br>(1.02% - 1.33%) | 0.99%<br>(0.85% - 1.15%) | 0.89%<br>(0.75% - 1.03%) | 0.04%<br>(0.02% - 0.07%) | 0.01%<br>(0.00% - 0.02%) | 0.00%<br>(0.00% - 0.02%) | 0.00%<br>(0.00% - 0.01%) | 0.00%<br>(0.00% - 0.00%) | 0.00%<br>(0.00% - 0.00%) | 0.00%<br>(0.00% - 0.00%) | 0.00%<br>(0.00% - 0.00%) |

Table S8b. Estimated overall, severe, and extreme **wasting prevalence (%)** in children under 5 years, both sexes, in 1990, 2000, 2010, and 2020.

| Location                         | Total             |                  |                 |                 | Severe          |                 |                 |                 | Extreme         |                 |                 |                 |
|----------------------------------|-------------------|------------------|-----------------|-----------------|-----------------|-----------------|-----------------|-----------------|-----------------|-----------------|-----------------|-----------------|
|                                  | 1990              | 2000             | 2010            | 2020            | 1990            | 2000            | 2010            | 2020            | 1990            | 2000            | 2010            | 2020            |
| South East England               | 1.33%             | 1.11%            | 1.00%           | 0.94%           | 0.03%           | 0.01%           | 0.00%           | 0.00%           | 0.00%           | 0.00%           | 0.00%           | 0.00%           |
|                                  | (1.17% - 1.50%)   | (0.96% - 1.29%)  | (0.85% - 1.15%) | (0.80% - 1.07%) | (0.01% - 0.06%) | (0.00% - 0.02%) | (0.00% - 0.01%) | (0.00% - 0.01%) | (0.00% - 0.00%) | (0.00% - 0.00%) | (0.00% - 0.00%) | (0.00% - 0.00%) |
| South West England               | 1.44%             | 1.08%            | 1.01%           | 1.01%           | 0.04%           | 0.01%           | 0.00%           | 0.00%           | 0.00%           | 0.00%           | 0.00%           | 0.00%           |
|                                  | (1.26% - 1.65%)   | (1.03% - 1.38%)  | (0.94% - 1.24%) | (0.87% - 1.16%) | (0.02% - 0.07%) | (0.00% - 0.02%) | (0.00% - 0.02%) | (0.00% - 0.01%) | (0.00% - 0.00%) | (0.00% - 0.00%) | (0.00% - 0.00%) | (0.00% - 0.00%) |
| Latin America and Caribbean      | 3.49%             | 2.62%            | 2.16%           | 1.80%           | 0.31%           | 0.15%           | 0.10%           | 0.06%           | 0.02%           | 0.01%           | 0.00%           | 0.00%           |
|                                  | (3.45% - 3.53%)   | (2.59% - 2.65%)  | (2.13% - 2.19%) | (1.77% - 1.83%) | (0.29% - 0.32%) | (0.15% - 0.16%) | (0.09% - 0.10%) | (0.05% - 0.06%) | (0.02% - 0.02%) | (0.00% - 0.01%) | (0.00% - 0.00%) | (0.00% - 0.00%) |
| Andean Latin America             | 2.45%             | 1.86%            | 1.45%           | 1.10%           | 0.08%           | 0.07%           | 0.04%           | 0.02%           | 0.00%           | 0.00%           | 0.00%           | 0.00%           |
|                                  | (2.36% - 2.55%)   | (1.80% - 1.93%)  | (1.37% - 1.52%) | (1.04% - 1.18%) | (0.06% - 0.09%) | (0.06% - 0.08%) | (0.03% - 0.05%) | (0.01% - 0.02%) | (0.00% - 0.00%) | (0.00% - 0.00%) | (0.00% - 0.00%) | (0.00% - 0.00%) |
| Bolivia (Plurinational State of) | 2.95%             | 2.36%            | 1.89%           | 1.50%           | 0.16%           | 0.10%           | 0.06%           | 0.03%           | 0.00%           | 0.00%           | 0.00%           | 0.00%           |
|                                  | (2.78% - 3.15%)   | (2.20% - 2.52%)  | (1.76% - 2.05%) | (1.38% - 1.63%) | (0.12% - 0.19%) | (0.08% - 0.13%) | (0.05% - 0.08%) | (0.02% - 0.04%) | (0.00% - 0.00%) | (0.00% - 0.00%) | (0.00% - 0.00%) | (0.00% - 0.00%) |
| Ecuador                          | 3.20%             | 2.62%            | 2.32%           | 1.91%           | 0.18%           | 0.16%           | 0.10%           | 0.04%           | 0.00%           | 0.00%           | 0.00%           | 0.00%           |
|                                  | (2.98% - 3.41%)   | (2.46% - 2.79%)  | (2.18% - 2.48%) | (1.78% - 2.07%) | (0.14% - 0.23%) | (0.13% - 0.20%) | (0.07% - 0.12%) | (0.03% - 0.06%) | (0.00% - 0.00%) | (0.00% - 0.00%) | (0.00% - 0.00%) | (0.00% - 0.00%) |
| Peru                             | 1.94%             | 1.26%            | 0.73%           | 0.49%           | 0.00%           | 0.00%           | 0.00%           | 0.00%           | 0.00%           | 0.00%           | 0.00%           | 0.00%           |
|                                  | (1.82% - 2.07%)   | (1.18% - 1.34%)  | (0.61% - 0.80%) | (0.39% - 0.59%) | (0.00% - 0.01%) | (0.00% - 0.00%) | (0.00% - 0.00%) | (0.00% - 0.00%) | (0.00% - 0.00%) | (0.00% - 0.00%) | (0.00% - 0.00%) | (0.00% - 0.00%) |
| Caribbean                        | 4.41%             | 4.33%            | 4.15%           | 3.62%           | 0.62%           | 0.62%           | 0.55%           | 0.37%           | 0.03%           | 0.02%           | 0.01%           | 0.00%           |
|                                  | (4.28% - 4.55%)   | (4.19% - 4.46%)  | (3.99% - 4.30%) | (3.45% - 3.79%) | (0.57% - 0.68%) | (0.57% - 0.68%) | (0.49% - 0.61%) | (0.32% - 0.43%) | (0.02% - 0.04%) | (0.02% - 0.03%) | (0.00% - 0.01%) | (0.00% - 0.00%) |
| Antigua and Barbuda              | 7.28%             | 5.42%            | 3.90%           | 3.48%           | 1.42%           | 0.67%           | 0.23%           | 0.14%           | 0.03%           | 0.00%           | 0.00%           | 0.00%           |
|                                  | (6.61% - 7.95%)   | (4.91% - 5.97%)  | (3.48% - 4.31%) | (3.10% - 3.90%) | (1.15% - 1.70%) | (0.49% - 0.86%) | (0.13% - 0.34%) | (0.07% - 0.23%) | (0.00% - 0.07%) | (0.00% - 0.00%) | (0.00% - 0.00%) | (0.00% - 0.00%) |
| Bahamas                          | 2.70%             | 2.64%            | 2.60%           | 2.54%           | 0.05%           | 0.03%           | 0.03%           | 0.02%           | 0.00%           | 0.00%           | 0.00%           | 0.00%           |
|                                  | (2.42% - 3.02%)   | (2.36% - 2.96%)  | (2.34% - 2.93%) | (2.27% - 2.87%) | (0.02% - 0.08%) | (0.01% - 0.06%) | (0.01% - 0.06%) | (0.01% - 0.05%) | (0.00% - 0.00%) | (0.00% - 0.00%) | (0.00% - 0.00%) | (0.00% - 0.00%) |
| Barbados                         | 4.88%             | 4.18%            | 3.95%           | 3.66%           | 0.45%           | 0.23%           | 0.17%           | 0.12%           | 0.00%           | 0.00%           | 0.00%           | 0.00%           |
|                                  | (4.46% - 5.32%)   | (3.78% - 4.61%)  | (3.56% - 4.36%) | (3.29% - 4.05%) | (0.32% - 0.59%) | (0.13% - 0.35%) | (0.09% - 0.29%) | (0.05% - 0.21%) | (0.00% - 0.00%) | (0.00% - 0.00%) | (0.00% - 0.00%) | (0.00% - 0.00%) |
| Belize                           | 5.01%             | 4.24%            | 3.43%           | 3.15%           | 0.52%           | 0.32%           | 0.15%           | 0.11%           | 0.00%           | 0.00%           | 0.00%           | 0.00%           |
|                                  | (4.53% - 5.47%)   | (3.83% - 4.62%)  | (3.12% - 3.77%) | (2.86% - 3.48%) | (0.37% - 0.67%) | (0.22% - 0.44%) | (0.09% - 0.22%) | (0.08% - 0.17%) | (0.00% - 0.00%) | (0.00% - 0.00%) | (0.00% - 0.00%) | (0.00% - 0.00%) |
| Cuba                             | 1.80%             | 1.92%            | 1.53%           | 1.39%           | 0.02%           | 0.00%           | 0.00%           | 0.00%           | 0.00%           | 0.00%           | 0.00%           | 0.00%           |
|                                  | (1.69% - 1.91%)   | (1.79% - 2.08%)  | (1.41% - 1.68%) | (1.25% - 1.55%) | (0.01% - 0.04%) | (0.00% - 0.00%) | (0.00% - 0.01%) | (0.00% - 0.01%) | (0.00% - 0.00%) | (0.00% - 0.00%) | (0.00% - 0.00%) | (0.00% - 0.00%) |
| Dominica                         | 2.99%             | 2.65%            | 2.54%           | 2.55%           | 0.07%           | 0.04%           | 0.03%           | 0.02%           | 0.00%           | 0.00%           | 0.00%           | 0.00%           |
|                                  | (2.68% - 3.33%)   | (2.38% - 2.96%)  | (2.26% - 2.86%) | (2.29% - 2.86%) | (0.04% - 0.12%) | (0.01% - 0.07%) | (0.01% - 0.05%) | (0.01% - 0.05%) | (0.00% - 0.00%) | (0.00% - 0.00%) | (0.00% - 0.00%) | (0.00% - 0.00%) |
| Dominican Republic               | 2.38%             | 2.14%            | 1.97%           | 1.63%           | 0.09%           | 0.06%           | 0.03%           | 0.01%           | 0.00%           | 0.00%           | 0.00%           | 0.00%           |
|                                  | (2.23% - 2.56%)   | (2.00% - 2.29%)  | (1.83% - 2.10%) | (1.50% - 1.76%) | (0.07% - 0.12%) | (0.05% - 0.09%) | (0.02% - 0.04%) | (0.00% - 0.02%) | (0.00% - 0.00%) | (0.00% - 0.00%) | (0.00% - 0.00%) | (0.00% - 0.00%) |
| Grenada                          | 4.00%             | 3.39%            | 3.23%           | 2.88%           | 0.20%           | 0.11%           | 0.09%           | 0.05%           | 0.00%           | 0.00%           | 0.00%           | 0.00%           |
|                                  | (3.56% - 4.45%)   | (3.04% - 3.81%)  | (2.87% - 3.61%) | (2.57% - 3.25%) | (0.13% - 0.31%) | (0.06% - 0.18%) | (0.04% - 0.15%) | (0.02% - 0.09%) | (0.00% - 0.00%) | (0.00% - 0.00%) | (0.00% - 0.00%) | (0.00% - 0.00%) |
| Guyana                           | 12.82%            | 10.32%           | 7.36%           | 5.64%           | 3.54%           | 2.47%           | 1.28%           | 0.69%           | 0.38%           | 0.13%           | 0.01%           | 0.00%           |
|                                  | (12.07% - 13.62%) | (9.71% - 10.94%) | (6.90% - 7.85%) | (5.25% - 6.05%) | (3.13% - 3.98%) | (2.16% - 2.78%) | (1.11% - 1.49%) | (0.55% - 0.83%) | (0.24% - 0.55%) | (0.05% - 0.22%) | (0.00% - 0.03%) | (0.00% - 0.00%) |
| Haiti                            | 8.35%             | 8.27%            | 7.29%           | 5.90%           | 1.69%           | 1.73%           | 1.33%           | 0.82%           | 0.06%           | 0.07%           | 0.02%           | 0.00%           |
|                                  | (7.89% - 8.81%)   | (7.84% - 8.70%)  | (6.89% - 7.69%) | (5.52% - 6.29%) | (1.51% - 1.88%) | (1.56% - 1.92%) | (1.17% - 1.49%) | (0.69% - 0.96%) | (0.03% - 0.09%) | (0.04% - 0.10%) | (0.00% - 0.04%) | (0.00% - 0.00%) |
| Jamaica                          | 4.26%             | 3.31%            | 2.91%           | 2.59%           | 0.22%           | 0.08%           | 0.03%           | 0.02%           | 0.00%           | 0.00%           | 0.00%           | 0.00%           |
|                                  | (3.97% - 4.54%)   | (3.09% - 3.53%)  | (2.69% - 3.14%) | (2.39% - 2.80%) | (0.16% - 0.31%) | (0.06% - 0.11%) | (0.02% - 0.06%) | (0.00% - 0.03%) | (0.00% - 0.00%) | (0.00% - 0.00%) | (0.00% - 0.00%) | (0.00% - 0.00%) |
| Saint Lucia                      | 4.30%             | 3.85%            | 3.40%           | 3.25%           | 0.30%           | 0.19%           | 0.11%           | 0.08%           | 0.00%           | 0.00%           | 0.00%           | 0.00%           |
|                                  | (3.84% - 4.79%)   | (3.44% - 4.31%)  | (3.01% - 3.82%) | (2.86% - 3.65%) | (0.17% - 0.45%) | (0.08% - 0.32%) | (0.04% - 0.22%) | (0.02% - 0.18%) | (0.00% - 0.00%) | (0.00% - 0.00%) | (0.00% - 0.00%) | (0.00% - 0.00%) |
| Saint Vincent and the Grenadines | 3.63%             | 3.40%            | 2.94%           | 2.71%           | 0.15%           | 0.11%           | 0.06%           | 0.03%           | 0.00%           | 0.00%           | 0.00%           | 0.00%           |
|                                  | (3.24% - 4.03%)   | (3.04% - 3.79%)  | (2.63% - 3.30%) | (2.44% - 3.05%) | (0.09% - 0.23%) | (0.06% - 0.18%) | (0.02% - 0.10%) | (0.01% - 0.07%) | (0.00% - 0.00%) | (0.00% - 0.00%) | (0.00% - 0.00%) | (0.00% - 0.00%) |
| Suriname                         | 7.59%             | 6.86%            | 5.50%           | 5.07%           | 1.15%           | 0.92%           | 0.58%           | 0.47%           | 0.00%           | 0.00%           | 0.00%           | 0.00%           |
|                                  | (7.03% - 8.22%)   | (6.42% - 7.34%)  | (5.13% - 5.90%) | (4.65% - 5.48%) | (0.93% - 1.38%) | (0.76% - 1.09%) | (0.46% - 0.71%) | (0.35% - 0.60%) | (0.00% - 0.02%) | (0.00% - 0.01%) | (0.00% - 0.00%) | (0.00% - 0.00%) |
| Trinidad and Tobago              | 5.10%             | 5.42%            | 5.83%           | 5.26%           | 0.41%           | 0.54%           | 0.78%           | 0.61%           | 0.00%           | 0.00%           | 0.00%           | 0.00%           |
|                                  | (4.61% - 5.64%)   | (4.96% - 5.94%)  | (5.37% - 6.33%) | (4.80% - 5.77%) | (0.26% - 0.58%) | (0.39% - 0.72%) | (0.61% - 0.96%) | (0.45% - 0.79%) | (0.00% - 0.00%) | (0.00% - 0.00%) | (0.00% - 0.00%) | (0.00% - 0.00%) |

Table S8b. Estimated overall, severe, and extreme wasting prevalence (%) in children under 5 years, both sexes, in 1990, 2000, 2010, and 2020.

| Location                     | Total                    |                          |                          |                          | Severe                   |                          |                          |                          | Extreme                  |                          |                          |                          |
|------------------------------|--------------------------|--------------------------|--------------------------|--------------------------|--------------------------|--------------------------|--------------------------|--------------------------|--------------------------|--------------------------|--------------------------|--------------------------|
|                              | 1990                     | 2000                     | 2010                     | 2020                     | 1990                     | 2000                     | 2010                     | 2020                     | 1990                     | 2000                     | 2010                     | 2020                     |
| Bermuda                      | 1.83%<br>(1.65% - 2.05%) | 1.83%<br>(1.64% - 2.05%) | 1.74%<br>(1.55% - 1.96%) | 1.62%<br>(1.43% - 1.82%) | 0.01%<br>(0.00% - 0.02%) | 0.00%<br>(0.00% - 0.01%) | 0.00%<br>(0.00% - 0.01%) | 0.00%<br>(0.00% - 0.00%) | 0.00%<br>(0.00% - 0.00%) | 0.00%<br>(0.00% - 0.00%) | 0.00%<br>(0.00% - 0.00%) | 0.00%<br>(0.00% - 0.00%) |
| Puerto Rico                  | 1.89%<br>(1.68% - 2.11%) | 1.76%<br>(1.56% - 1.98%) | 1.57%<br>(1.39% - 1.77%) | 1.46%<br>(1.30% - 1.65%) | 0.01%<br>(0.00% - 0.02%) | 0.00%<br>(0.00% - 0.01%) | 0.00%<br>(0.00% - 0.00%) | 0.00%<br>(0.00% - 0.00%) | 0.00%<br>(0.00% - 0.00%) | 0.00%<br>(0.00% - 0.00%) | 0.00%<br>(0.00% - 0.00%) | 0.00%<br>(0.00% - 0.00%) |
| Saint Kitts and Nevis        | 3.31%<br>(2.96% - 3.67%) | 2.86%<br>(2.56% - 3.17%) | 2.61%<br>(2.35% - 2.90%) | 2.40%<br>(2.14% - 2.69%) | 0.11%<br>(0.07% - 0.17%) | 0.05%<br>(0.03% - 0.09%) | 0.03%<br>(0.01% - 0.06%) | 0.02%<br>(0.00% - 0.04%) | 0.00%<br>(0.00% - 0.00%) | 0.00%<br>(0.00% - 0.00%) | 0.00%<br>(0.00% - 0.00%) | 0.00%<br>(0.00% - 0.00%) |
| United States Virgin Islands | 2.46%<br>(2.20% - 2.77%) | 2.20%<br>(1.97% - 2.46%) | 1.97%<br>(1.77% - 2.21%) | 2.00%<br>(1.77% - 2.24%) | 0.03%<br>(0.01% - 0.05%) | 0.01%<br>(0.00% - 0.03%) | 0.00%<br>(0.00% - 0.02%) | 0.00%<br>(0.00% - 0.01%) | 0.00%<br>(0.00% - 0.00%) | 0.00%<br>(0.00% - 0.00%) | 0.00%<br>(0.00% - 0.00%) | 0.00%<br>(0.00% - 0.00%) |
| <b>Central Latin America</b> | 3.77%<br>(3.72% - 3.82%) | 2.72%<br>(2.67% - 2.76%) | 2.24%<br>(2.19% - 2.28%) | 1.86%<br>(1.82% - 1.91%) | 0.36%<br>(0.34% - 0.38%) | 0.15%<br>(0.14% - 0.16%) | 0.08%<br>(0.07% - 0.09%) | 0.04%<br>(0.04% - 0.05%) | 0.04%<br>(0.03% - 0.04%) | 0.01%<br>(0.01% - 0.01%) | 0.00%<br>(0.00% - 0.00%) | 0.00%<br>(0.00% - 0.00%) |
| Colombia                     | 2.27%<br>(2.11% - 2.42%) | 1.58%<br>(1.48% - 1.69%) | 1.26%<br>(1.17% - 1.36%) | 0.99%<br>(0.90% - 1.20%) | 0.02%<br>(0.01% - 0.03%) | 0.01%<br>(0.00% - 0.01%) | 0.00%<br>(0.00% - 0.01%) | 0.00%<br>(0.00% - 0.00%) | 0.00%<br>(0.00% - 0.00%) | 0.00%<br>(0.00% - 0.00%) | 0.00%<br>(0.00% - 0.00%) | 0.00%<br>(0.00% - 0.00%) |
| Costa Rica                   | 1.53%<br>(1.36% - 1.69%) | 1.37%<br>(1.19% - 1.55%) | 1.10%<br>(0.97% - 1.26%) | 0.88%<br>(0.77% - 1.01%) | 0.01%<br>(0.00% - 0.03%) | 0.01%<br>(0.00% - 0.03%) | 0.00%<br>(0.00% - 0.01%) | 0.00%<br>(0.00% - 0.00%) | 0.00%<br>(0.00% - 0.00%) | 0.00%<br>(0.00% - 0.00%) | 0.00%<br>(0.00% - 0.00%) | 0.00%<br>(0.00% - 0.00%) |
| El Salvador                  | 2.78%<br>(2.59% - 2.99%) | 1.74%<br>(1.62% - 1.88%) | 1.52%<br>(1.41% - 1.66%) | 1.41%<br>(1.31% - 1.55%) | 0.08%<br>(0.05% - 0.10%) | 0.01%<br>(0.00% - 0.02%) | 0.01%<br>(0.01% - 0.03%) | 0.02%<br>(0.01% - 0.03%) | 0.00%<br>(0.00% - 0.00%) | 0.00%<br>(0.00% - 0.00%) | 0.00%<br>(0.00% - 0.00%) | 0.00%<br>(0.00% - 0.00%) |
| Guatemala                    | 3.64%<br>(3.40% - 3.89%) | 3.00%<br>(2.83% - 3.16%) | 1.45%<br>(1.34% - 1.58%) | 1.02%<br>(0.91% - 1.23%) | 0.22%<br>(0.18% - 0.27%) | 0.17%<br>(0.14% - 0.20%) | 0.00%<br>(0.00% - 0.00%) | 0.00%<br>(0.00% - 0.00%) | 0.00%<br>(0.00% - 0.00%) | 0.00%<br>(0.00% - 0.00%) | 0.00%<br>(0.00% - 0.00%) | 0.00%<br>(0.00% - 0.00%) |
| Honduras                     | 2.34%<br>(2.19% - 2.50%) | 1.83%<br>(1.71% - 1.95%) | 1.42%<br>(1.32% - 1.52%) | 1.24%<br>(1.14% - 1.42%) | 0.00%<br>(0.00% - 0.00%) | 0.00%<br>(0.00% - 0.01%) | 0.00%<br>(0.00% - 0.01%) | 0.00%<br>(0.00% - 0.01%) | 0.00%<br>(0.00% - 0.00%) | 0.00%<br>(0.00% - 0.00%) | 0.00%<br>(0.00% - 0.00%) | 0.00%<br>(0.00% - 0.00%) |
| Mexico                       | 4.46%<br>(4.38% - 4.54%) | 3.03%<br>(2.98% - 3.09%) | 2.54%<br>(2.48% - 2.60%) | 2.15%<br>(2.10% - 2.22%) | 0.59%<br>(0.56% - 0.62%) | 0.23%<br>(0.21% - 0.25%) | 0.15%<br>(0.13% - 0.16%) | 0.08%<br>(0.07% - 0.09%) | 0.07%<br>(0.06% - 0.09%) | 0.02%<br>(0.01% - 0.03%) | 0.01%<br>(0.00% - 0.01%) | 0.00%<br>(0.00% - 0.01%) |
| Agua Calientes               | 5.40%<br>(5.00% - 5.78%) | 3.86%<br>(3.56% - 4.20%) | 3.29%<br>(3.06% - 3.58%) | 2.88%<br>(2.66% - 3.10%) | 0.60%<br>(0.49% - 0.73%) | 0.26%<br>(0.21% - 0.32%) | 0.18%<br>(0.14% - 0.22%) | 0.12%<br>(0.09% - 0.15%) | 0.00%<br>(0.00% - 0.01%) | 0.00%<br>(0.00% - 0.00%) | 0.00%<br>(0.00% - 0.00%) | 0.00%<br>(0.00% - 0.00%) |
| Baja California              | 4.76%<br>(4.40% - 5.13%) | 3.32%<br>(3.03% - 3.60%) | 2.88%<br>(2.63% - 3.17%) | 2.47%<br>(2.25% - 2.72%) | 0.41%<br>(0.30% - 0.53%) | 0.09%<br>(0.04% - 0.14%) | 0.02%<br>(0.00% - 0.05%) | 0.00%<br>(0.00% - 0.01%) | 0.00%<br>(0.00% - 0.00%) | 0.00%<br>(0.00% - 0.00%) | 0.00%<br>(0.00% - 0.00%) | 0.00%<br>(0.00% - 0.00%) |
| Baja California Sur          | 1.52%<br>(1.39% - 1.63%) | 1.08%<br>(1.00% - 1.18%) | 0.92%<br>(0.85% - 0.99%) | 0.82%<br>(0.75% - 0.95%) | 0.07%<br>(0.05% - 0.09%) | 0.02%<br>(0.01% - 0.04%) | 0.01%<br>(0.00% - 0.02%) | 0.00%<br>(0.00% - 0.01%) | 0.00%<br>(0.00% - 0.00%) | 0.00%<br>(0.00% - 0.00%) | 0.00%<br>(0.00% - 0.00%) | 0.00%<br>(0.00% - 0.00%) |
| Campeche                     | 3.96%<br>(3.68% - 4.24%) | 2.62%<br>(2.45% - 2.83%) | 2.13%<br>(1.99% - 2.30%) | 1.74%<br>(1.60% - 1.89%) | 0.42%<br>(0.34% - 0.52%) | 0.15%<br>(0.11% - 0.19%) | 0.07%<br>(0.05% - 0.10%) | 0.03%<br>(0.01% - 0.05%) | 0.00%<br>(0.00% - 0.00%) | 0.00%<br>(0.00% - 0.00%) | 0.00%<br>(0.00% - 0.00%) | 0.00%<br>(0.00% - 0.00%) |
| Coahuila                     | 6.21%<br>(5.79% - 6.65%) | 4.23%<br>(3.88% - 4.62%) | 3.54%<br>(3.25% - 3.86%) | 3.22%<br>(2.94% - 3.54%) | 0.94%<br>(0.78% - 1.12%) | 0.35%<br>(0.25% - 0.46%) | 0.26%<br>(0.18% - 0.36%) | 0.20%<br>(0.12% - 0.30%) | 0.00%<br>(0.00% - 0.01%) | 0.00%<br>(0.00% - 0.00%) | 0.00%<br>(0.00% - 0.00%) | 0.00%<br>(0.00% - 0.00%) |
| Colima                       | 3.27%<br>(3.02% - 3.54%) | 1.99%<br>(1.81% - 2.18%) | 1.72%<br>(1.57% - 1.90%) | 1.53%<br>(1.39% - 1.70%) | 0.29%<br>(0.22% - 0.36%) | 0.07%<br>(0.05% - 0.10%) | 0.04%<br>(0.02% - 0.06%) | 0.02%<br>(0.01% - 0.04%) | 0.00%<br>(0.00% - 0.00%) | 0.00%<br>(0.00% - 0.00%) | 0.00%<br>(0.00% - 0.00%) | 0.00%<br>(0.00% - 0.00%) |
| Chiapas                      | 6.25%<br>(5.90% - 6.58%) | 3.20%<br>(3.02% - 3.40%) | 2.03%<br>(1.90% - 2.16%) | 1.55%<br>(1.39% - 1.68%) | 1.01%<br>(0.88% - 1.13%) | 0.25%<br>(0.21% - 0.29%) | 0.06%<br>(0.04% - 0.09%) | 0.02%<br>(0.01% - 0.03%) | 0.02%<br>(0.00% - 0.04%) | 0.00%<br>(0.00% - 0.00%) | 0.00%<br>(0.00% - 0.00%) | 0.00%<br>(0.00% - 0.00%) |
| Chihuahua                    | 4.12%<br>(3.85% - 4.39%) | 3.47%<br>(3.25% - 3.72%) | 2.55%<br>(2.39% - 2.74%) | 2.27%<br>(2.12% - 2.45%) | 0.34%<br>(0.27% - 0.41%) | 0.22%<br>(0.19% - 0.26%) | 0.09%<br>(0.07% - 0.11%) | 0.05%<br>(0.04% - 0.08%) | 0.00%<br>(0.00% - 0.00%) | 0.00%<br>(0.00% - 0.00%) | 0.00%<br>(0.00% - 0.00%) | 0.00%<br>(0.00% - 0.00%) |
| Mexico City                  | 3.64%<br>(3.40% - 3.91%) | 2.54%<br>(2.38% - 2.73%) | 1.62%<br>(1.50% - 1.76%) | 1.38%<br>(1.28% - 1.50%) | 0.30%<br>(0.24% - 0.36%) | 0.11%<br>(0.08% - 0.15%) | 0.01%<br>(0.00% - 0.03%) | 0.00%<br>(0.00% - 0.01%) | 0.00%<br>(0.00% - 0.00%) | 0.00%<br>(0.00% - 0.00%) | 0.00%<br>(0.00% - 0.00%) | 0.00%<br>(0.00% - 0.00%) |
| Durango                      | 3.38%<br>(2.95% - 3.70%) | 1.88%<br>(1.69% - 2.08%) | 1.26%<br>(1.14% - 1.40%) | 1.11%<br>(0.99% - 1.25%) | 0.17%<br>(0.08% - 0.27%) | 0.01%<br>(0.00% - 0.02%) | 0.00%<br>(0.00% - 0.01%) | 0.00%<br>(0.00% - 0.00%) | 0.00%<br>(0.00% - 0.00%) | 0.00%<br>(0.00% - 0.00%) | 0.00%<br>(0.00% - 0.00%) | 0.00%<br>(0.00% - 0.00%) |
| Guanajuato                   | 4.72%<br>(4.35% - 5.12%) | 3.00%<br>(2.72% - 3.27%) | 2.89%<br>(2.65% - 3.14%) | 2.52%<br>(2.30% - 2.75%) | 0.33%<br>(0.23% - 0.45%) | 0.04%<br>(0.00% - 0.10%) | 0.04%<br>(0.00% - 0.10%) | 0.01%<br>(0.00% - 0.06%) | 0.00%<br>(0.00% - 0.00%) | 0.00%<br>(0.00% - 0.00%) | 0.00%<br>(0.00% - 0.00%) | 0.00%<br>(0.00% - 0.00%) |
| Guerrero                     | 4.06%<br>(3.91% - 4.24%) | 2.35%<br>(2.22% - 2.50%) | 1.68%<br>(1.55% - 1.81%) | 1.56%<br>(1.43% - 1.70%) | 0.38%<br>(0.33% - 0.43%) | 0.07%<br>(0.05% - 0.09%) | 0.01%<br>(0.00% - 0.03%) | 0.00%<br>(0.00% - 0.00%) | 0.00%<br>(0.00% - 0.00%) | 0.00%<br>(0.00% - 0.00%) | 0.00%<br>(0.00% - 0.00%) | 0.00%<br>(0.00% - 0.00%) |

Table S8b. Estimated overall, severe, and extreme **wasting prevalence (%)** in children under 5 years, both sexes, in 1990, 2000, 2010, and 2020.

| Location                                  | Total                       |                          |                          |                          | Severe                   |                          |                          |                          | Extreme                  |                          |                          |                          |
|-------------------------------------------|-----------------------------|--------------------------|--------------------------|--------------------------|--------------------------|--------------------------|--------------------------|--------------------------|--------------------------|--------------------------|--------------------------|--------------------------|
|                                           | 1990                        | 2000                     | 2010                     | 2020                     | 1990                     | 2000                     | 2010                     | 2020                     | 1990                     | 2000                     | 2010                     | 2020                     |
| <i>Hidalgo</i>                            | 3.99%<br>(3.71% - 4.29%)    | 2.47%<br>(2.29% - 2.69%) | 2.02%<br>(1.86% - 2.18%) | 1.64%<br>(1.51% - 1.78%) | 0.24%<br>(0.18% - 0.31%) | 0.05%<br>(0.03% - 0.07%) | 0.03%<br>(0.01% - 0.04%) | 0.01%<br>(0.00% - 0.02%) | 0.00%<br>(0.00% - 0.00%) | 0.00%<br>(0.00% - 0.00%) | 0.00%<br>(0.00% - 0.00%) | 0.00%<br>(0.00% - 0.00%) |
| <i>Jalisco</i>                            | 2.35%<br>(2.08% - 2.60%)    | 1.49%<br>(1.33% - 1.67%) | 1.21%<br>(1.08% - 1.36%) | 1.12%<br>(1.00% - 1.25%) | 0.04%<br>(0.00% - 0.11%) | 0.00%<br>(0.00% - 0.00%) | 0.00%<br>(0.00% - 0.00%) | 0.00%<br>(0.00% - 0.00%) | 0.00%<br>(0.00% - 0.00%) | 0.00%<br>(0.00% - 0.00%) | 0.00%<br>(0.00% - 0.00%) | 0.00%<br>(0.00% - 0.00%) |
| <i>México</i>                             | 3.58%<br>(3.25% - 3.91%)    | 2.74%<br>(2.47% - 3.00%) | 2.99%<br>(2.69% - 3.33%) | 2.26%<br>(1.99% - 2.66%) | 0.22%<br>(0.12% - 0.32%) | 0.10%<br>(0.03% - 0.17%) | 0.14%<br>(0.07% - 0.24%) | 0.01%<br>(0.00% - 0.04%) | 0.00%<br>(0.00% - 0.00%) | 0.00%<br>(0.00% - 0.00%) | 0.00%<br>(0.00% - 0.00%) | 0.00%<br>(0.00% - 0.00%) |
| <i>Michoacán de Ocampo</i>                | 3.19%<br>(2.92% - 3.47%)    | 2.23%<br>(1.90% - 2.47%) | 2.54%<br>(2.31% - 2.80%) | 2.10%<br>(1.88% - 2.34%) | 0.27%<br>(0.18% - 0.36%) | 0.08%<br>(0.03% - 0.14%) | 0.18%<br>(0.11% - 0.26%) | 0.08%<br>(0.03% - 0.15%) | 0.00%<br>(0.00% - 0.00%) | 0.00%<br>(0.00% - 0.00%) | 0.00%<br>(0.00% - 0.00%) | 0.00%<br>(0.00% - 0.00%) |
| <i>Morelos</i>                            | 9.73%<br>(9.07% - 10.46%)   | 7.34%<br>(6.74% - 7.90%) | 6.61%<br>(6.11% - 7.18%) | 5.92%<br>(5.37% - 6.49%) | 2.72%<br>(2.27% - 3.24%) | 1.74%<br>(1.41% - 2.09%) | 1.45%<br>(1.17% - 1.79%) | 1.21%<br>(0.91% - 1.51%) | 0.57%<br>(0.35% - 0.85%) | 0.29%<br>(0.15% - 0.45%) | 0.21%<br>(0.09% - 0.36%) | 0.13%<br>(0.02% - 0.25%) |
| <i>Nayarit</i>                            | 3.74%<br>(3.47% - 4.08%)    | 2.38%<br>(2.18% - 2.60%) | 1.92%<br>(1.77% - 2.08%) | 1.68%<br>(1.56% - 1.83%) | 0.25%<br>(0.20% - 0.32%) | 0.09%<br>(0.06% - 0.12%) | 0.05%<br>(0.04% - 0.08%) | 0.04%<br>(0.02% - 0.05%) | 0.00%<br>(0.00% - 0.00%) | 0.00%<br>(0.00% - 0.00%) | 0.00%<br>(0.00% - 0.00%) | 0.00%<br>(0.00% - 0.00%) |
| <i>Nuevo León</i>                         | 3.50%<br>(3.18% - 3.77%)    | 2.86%<br>(2.50% - 3.13%) | 3.02%<br>(2.75% - 3.28%) | 2.70%<br>(2.48% - 2.94%) | 0.24%<br>(0.17% - 0.32%) | 0.12%<br>(0.06% - 0.18%) | 0.18%<br>(0.10% - 0.26%) | 0.11%<br>(0.05% - 0.19%) | 0.00%<br>(0.00% - 0.00%) | 0.00%<br>(0.00% - 0.00%) | 0.00%<br>(0.00% - 0.00%) | 0.00%<br>(0.00% - 0.00%) |
| <i>Oaxaca</i>                             | 3.20%<br>(2.97% - 3.43%)    | 2.65%<br>(2.46% - 2.84%) | 2.57%<br>(2.38% - 2.83%) | 2.11%<br>(1.95% - 2.29%) | 0.15%<br>(0.12% - 0.18%) | 0.09%<br>(0.07% - 0.12%) | 0.07%<br>(0.05% - 0.10%) | 0.03%<br>(0.01% - 0.05%) | 0.00%<br>(0.00% - 0.00%) | 0.00%<br>(0.00% - 0.00%) | 0.00%<br>(0.00% - 0.00%) | 0.00%<br>(0.00% - 0.00%) |
| <i>Puebla</i>                             | 2.80%<br>(2.60% - 3.03%)    | 1.87%<br>(1.73% - 2.02%) | 1.29%<br>(1.20% - 1.42%) | 1.37%<br>(1.24% - 1.50%) | 0.08%<br>(0.05% - 0.10%) | 0.01%<br>(0.00% - 0.02%) | 0.00%<br>(0.00% - 0.01%) | 0.00%<br>(0.00% - 0.00%) | 0.00%<br>(0.00% - 0.00%) | 0.00%<br>(0.00% - 0.00%) | 0.00%<br>(0.00% - 0.00%) | 0.00%<br>(0.00% - 0.00%) |
| <i>Querétaro</i>                          | 4.60%<br>(4.27% - 4.93%)    | 1.60%<br>(1.47% - 1.73%) | 0.88%<br>(0.80% - 0.96%) | 0.78%<br>(0.70% - 0.86%) | 0.85%<br>(0.73% - 0.98%) | 0.04%<br>(0.02% - 0.06%) | 0.00%<br>(0.00% - 0.00%) | 0.00%<br>(0.00% - 0.00%) | 0.16%<br>(0.11% - 0.21%) | 0.00%<br>(0.00% - 0.00%) | 0.00%<br>(0.00% - 0.00%) | 0.00%<br>(0.00% - 0.00%) |
| <i>Quintana Roo</i>                       | 1.43%<br>(1.33% - 1.53%)    | 0.88%<br>(0.76% - 0.97%) | 0.66%<br>(0.50% - 0.78%) | 0.50%<br>(0.33% - 0.65%) | 0.05%<br>(0.03% - 0.07%) | 0.01%<br>(0.00% - 0.02%) | 0.00%<br>(0.00% - 0.01%) | 0.00%<br>(0.00% - 0.00%) | 0.00%<br>(0.00% - 0.00%) | 0.00%<br>(0.00% - 0.00%) | 0.00%<br>(0.00% - 0.00%) | 0.00%<br>(0.00% - 0.00%) |
| <i>San Luis Potosí</i>                    | 14.33%<br>(13.36% - 15.31%) | 8.45%<br>(7.69% - 9.25%) | 5.22%<br>(4.73% - 5.76%) | 4.31%<br>(3.86% - 4.81%) | 5.86%<br>(5.05% - 6.72%) | 2.44%<br>(1.95% - 2.98%) | 0.91%<br>(0.69% - 1.20%) | 0.59%<br>(0.41% - 0.82%) | 1.91%<br>(1.42% - 2.46%) | 0.46%<br>(0.25% - 0.73%) | 0.02%<br>(0.00% - 0.11%) | 0.00%<br>(0.00% - 0.00%) |
| <i>Sinaloa</i>                            | 3.67%<br>(3.39% - 3.96%)    | 2.51%<br>(2.20% - 2.78%) | 1.93%<br>(1.76% - 2.22%) | 1.73%<br>(1.58% - 1.90%) | 0.26%<br>(0.17% - 0.36%) | 0.07%<br>(0.03% - 0.13%) | 0.03%<br>(0.01% - 0.04%) | 0.01%<br>(0.00% - 0.02%) | 0.00%<br>(0.00% - 0.00%) | 0.00%<br>(0.00% - 0.00%) | 0.00%<br>(0.00% - 0.00%) | 0.00%<br>(0.00% - 0.00%) |
| <i>Sonora</i>                             | 4.84%<br>(4.48% - 5.25%)    | 3.58%<br>(3.31% - 3.86%) | 3.62%<br>(3.35% - 3.91%) | 3.08%<br>(2.78% - 3.38%) | 0.52%<br>(0.41% - 0.63%) | 0.22%<br>(0.15% - 0.29%) | 0.22%<br>(0.16% - 0.30%) | 0.12%<br>(0.07% - 0.18%) | 0.00%<br>(0.00% - 0.00%) | 0.00%<br>(0.00% - 0.00%) | 0.00%<br>(0.00% - 0.00%) | 0.00%<br>(0.00% - 0.00%) |
| <i>Tabasco</i>                            | 1.16%<br>(1.03% - 1.30%)    | 0.58%<br>(0.47% - 0.72%) | 0.23%<br>(0.17% - 0.34%) | 0.19%<br>(0.02% - 0.47%) | 0.00%<br>(0.00% - 0.00%) | 0.00%<br>(0.00% - 0.00%) | 0.00%<br>(0.00% - 0.00%) | 0.00%<br>(0.00% - 0.00%) | 0.00%<br>(0.00% - 0.00%) | 0.00%<br>(0.00% - 0.00%) | 0.00%<br>(0.00% - 0.00%) | 0.00%<br>(0.00% - 0.00%) |
| <i>Tamaulipas</i>                         | 4.89%<br>(4.57% - 5.23%)    | 3.62%<br>(3.37% - 3.87%) | 3.18%<br>(2.96% - 3.42%) | 2.77%<br>(2.57% - 2.99%) | 0.69%<br>(0.58% - 0.82%) | 0.33%<br>(0.25% - 0.41%) | 0.21%<br>(0.17% - 0.26%) | 0.13%<br>(0.10% - 0.17%) | 0.00%<br>(0.00% - 0.01%) | 0.00%<br>(0.00% - 0.00%) | 0.00%<br>(0.00% - 0.00%) | 0.00%<br>(0.00% - 0.00%) |
| <i>Tlaxcala</i>                           | 5.42%<br>(5.04% - 5.80%)    | 3.75%<br>(3.43% - 4.05%) | 2.90%<br>(2.69% - 3.15%) | 2.56%<br>(2.36% - 2.78%) | 0.62%<br>(0.49% - 0.75%) | 0.18%<br>(0.13% - 0.24%) | 0.08%<br>(0.05% - 0.10%) | 0.05%<br>(0.03% - 0.07%) | 0.00%<br>(0.00% - 0.01%) | 0.00%<br>(0.00% - 0.00%) | 0.00%<br>(0.00% - 0.00%) | 0.00%<br>(0.00% - 0.00%) |
| <i>Veracruz de Ignacio de la Llave</i>    | 6.03%<br>(5.65% - 6.45%)    | 4.48%<br>(4.17% - 4.80%) | 3.40%<br>(3.16% - 3.66%) | 2.96%<br>(2.73% - 3.20%) | 0.87%<br>(0.73% - 1.02%) | 0.40%<br>(0.31% - 0.50%) | 0.19%<br>(0.13% - 0.27%) | 0.11%<br>(0.07% - 0.16%) | 0.01%<br>(0.00% - 0.03%) | 0.00%<br>(0.00% - 0.00%) | 0.00%<br>(0.00% - 0.00%) | 0.00%<br>(0.00% - 0.00%) |
| <i>Yucatán</i>                            | 8.50%<br>(7.85% - 9.17%)    | 6.34%<br>(5.81% - 6.94%) | 5.59%<br>(5.11% - 6.09%) | 4.95%<br>(4.52% - 5.43%) | 2.21%<br>(1.82% - 2.64%) | 1.38%<br>(1.10% - 1.71%) | 0.89%<br>(0.88% - 1.39%) | 1.11%<br>(0.69% - 1.13%) | 0.43%<br>(0.24% - 0.64%) | 0.19%<br>(0.07% - 0.34%) | 0.11%<br>(0.02% - 0.23%) | 0.05%<br>(0.00% - 0.14%) |
| <i>Zacatecas</i>                          | 5.79%<br>(5.44% - 6.16%)    | 4.61%<br>(4.30% - 4.92%) | 4.04%<br>(3.78% - 4.31%) | 3.33%<br>(3.13% - 3.55%) | 0.76%<br>(0.65% - 0.89%) | 0.48%<br>(0.40% - 0.56%) | 0.36%<br>(0.30% - 0.43%) | 0.24%<br>(0.20% - 0.29%) | 0.00%<br>(0.00% - 0.01%) | 0.00%<br>(0.00% - 0.00%) | 0.00%<br>(0.00% - 0.00%) | 0.00%<br>(0.00% - 0.00%) |
| <i>Nicaragua</i>                          | 2.98%<br>(2.81% - 3.16%)    | 2.34%<br>(2.20% - 2.49%) | 1.57%<br>(1.47% - 1.71%) | 1.23%<br>(1.14% - 1.32%) | 0.19%<br>(0.16% - 0.22%) | 0.09%<br>(0.07% - 0.11%) | 0.01%<br>(0.00% - 0.02%) | 0.00%<br>(0.00% - 0.00%) | 0.00%<br>(0.00% - 0.00%) | 0.00%<br>(0.00% - 0.00%) | 0.00%<br>(0.00% - 0.00%) | 0.00%<br>(0.00% - 0.00%) |
| <i>Panama</i>                             | 2.48%<br>(2.28% - 2.68%)    | 1.49%<br>(1.36% - 1.63%) | 1.18%<br>(1.07% - 1.31%) | 0.86%<br>(0.72% - 0.94%) | 0.04%<br>(0.02% - 0.06%) | 0.00%<br>(0.00% - 0.00%) | 0.00%<br>(0.00% - 0.00%) | 0.00%<br>(0.00% - 0.00%) | 0.00%<br>(0.00% - 0.00%) | 0.00%<br>(0.00% - 0.00%) | 0.00%<br>(0.00% - 0.00%) | 0.00%<br>(0.00% - 0.00%) |
| <i>Venezuela (Bolivarian Republic of)</i> | 4.57%<br>(4.40% - 4.73%)    | 4.08%<br>(3.92% - 4.25%) | 3.76%<br>(3.53% - 3.99%) | 3.39%<br>(3.13% - 3.67%) | 0.24%<br>(0.18% - 0.29%) | 0.13%<br>(0.08% - 0.18%) | 0.07%<br>(0.02% - 0.13%) | 0.02%<br>(0.00% - 0.07%) | 0.00%<br>(0.00% - 0.00%) | 0.00%<br>(0.00% - 0.00%) | 0.00%<br>(0.00% - 0.00%) | 0.00%<br>(0.00% - 0.00%) |

Table S8b. Estimated overall, severe, and extreme **wasting** prevalence (%) in children under 5 years, both sexes, in 1990, 2000, 2010, and 2020.

| Location                      | Total                    |                          |                          |                          | Severe                   |                          |                          |                          | Extreme                  |                          |                          |                          |
|-------------------------------|--------------------------|--------------------------|--------------------------|--------------------------|--------------------------|--------------------------|--------------------------|--------------------------|--------------------------|--------------------------|--------------------------|--------------------------|
|                               | 1990                     | 2000                     | 2010                     | 2020                     | 1990                     | 2000                     | 2010                     | 2020                     | 1990                     | 2000                     | 2010                     | 2020                     |
| <b>Tropical Latin America</b> | 3.21%<br>(3.14% - 3.29%) | 2.33%<br>(2.27% - 2.39%) | 1.83%<br>(1.79% - 1.87%) | 1.52%<br>(1.48% - 1.56%) | 0.24%<br>(0.22% - 0.25%) | 0.08%<br>(0.07% - 0.10%) | 0.03%<br>(0.03% - 0.04%) | 0.01%<br>(0.01% - 0.02%) | 0.00%<br>(0.00% - 0.01%) | 0.00%<br>(0.00% - 0.00%) | 0.00%<br>(0.00% - 0.00%) | 0.00%<br>(0.00% - 0.00%) |
| <b>Brazil</b>                 | 3.31%<br>(3.24% - 3.38%) | 2.38%<br>(2.32% - 2.44%) | 1.83%<br>(1.79% - 1.88%) | 1.54%<br>(1.50% - 1.58%) | 0.24%<br>(0.22% - 0.26%) | 0.09%<br>(0.08% - 0.10%) | 0.03%<br>(0.02% - 0.04%) | 0.01%<br>(0.01% - 0.02%) | 0.00%<br>(0.00% - 0.01%) | 0.00%<br>(0.00% - 0.00%) | 0.00%<br>(0.00% - 0.00%) | 0.00%<br>(0.00% - 0.00%) |
| <b>Acre</b>                   | 3.47%<br>(3.19% - 3.75%) | 2.81%<br>(2.60% - 3.06%) | 2.11%<br>(1.94% - 2.30%) | 1.68%<br>(1.55% - 1.84%) | 0.19%<br>(0.14% - 0.23%) | 0.10%<br>(0.07% - 0.13%) | 0.02%<br>(0.01% - 0.04%) | 0.00%<br>(0.00% - 0.01%) | 0.00%<br>(0.00% - 0.00%) | 0.00%<br>(0.00% - 0.00%) | 0.00%<br>(0.00% - 0.00%) | 0.00%<br>(0.00% - 0.00%) |
| <b>Alagoas</b>                | 7.51%<br>(6.91% - 8.14%) | 5.56%<br>(5.10% - 6.02%) | 4.06%<br>(3.72% - 4.45%) | 3.42%<br>(3.09% - 3.78%) | 1.65%<br>(1.35% - 2.00%) | 0.90%<br>(0.71% - 1.11%) | 0.47%<br>(0.34% - 0.62%) | 0.31%<br>(0.20% - 0.44%) | 0.17%<br>(0.05% - 0.33%) | 0.01%<br>(0.00% - 0.05%) | 0.00%<br>(0.00% - 0.00%) | 0.00%<br>(0.00% - 0.00%) |
| <b>Amazonas</b>               | 4.17%<br>(3.79% - 4.56%) | 2.92%<br>(2.71% - 3.19%) | 2.33%<br>(2.15% - 2.52%) | 1.95%<br>(1.80% - 2.12%) | 0.34%<br>(0.27% - 0.42%) | 0.15%<br>(0.12% - 0.18%) | 0.08%<br>(0.05% - 0.10%) | 0.04%<br>(0.02% - 0.06%) | 0.00%<br>(0.00% - 0.00%) | 0.00%<br>(0.00% - 0.00%) | 0.00%<br>(0.00% - 0.00%) | 0.00%<br>(0.00% - 0.00%) |
| <b>Amapá</b>                  | 2.24%<br>(2.07% - 2.44%) | 2.08%<br>(1.91% - 2.27%) | 1.71%<br>(1.57% - 1.89%) | 1.53%<br>(1.40% - 1.68%) | 0.05%<br>(0.03% - 0.07%) | 0.03%<br>(0.02% - 0.05%) | 0.00%<br>(0.00% - 0.01%) | 0.00%<br>(0.00% - 0.00%) | 0.00%<br>(0.00% - 0.00%) | 0.00%<br>(0.00% - 0.00%) | 0.00%<br>(0.00% - 0.00%) | 0.00%<br>(0.00% - 0.00%) |
| <b>Bahia</b>                  | 4.47%<br>(4.13% - 4.81%) | 2.95%<br>(2.70% - 3.21%) | 2.26%<br>(2.06% - 2.48%) | 1.86%<br>(1.66% - 2.05%) | 0.58%<br>(0.46% - 0.72%) | 0.18%<br>(0.11% - 0.26%) | 0.05%<br>(0.01% - 0.12%) | 0.01%<br>(0.00% - 0.04%) | 0.00%<br>(0.00% - 0.00%) | 0.00%<br>(0.00% - 0.00%) | 0.00%<br>(0.00% - 0.00%) | 0.00%<br>(0.00% - 0.00%) |
| <b>Ceará</b>                  | 4.72%<br>(4.34% - 5.11%) | 3.08%<br>(2.78% - 3.38%) | 1.92%<br>(1.73% - 2.17%) | 1.56%<br>(1.40% - 1.75%) | 0.39%<br>(0.28% - 0.52%) | 0.07%<br>(0.02% - 0.14%) | 0.00%<br>(0.00% - 0.02%) | 0.00%<br>(0.00% - 0.00%) | 0.00%<br>(0.00% - 0.00%) | 0.00%<br>(0.00% - 0.00%) | 0.00%<br>(0.00% - 0.00%) | 0.00%<br>(0.00% - 0.00%) |
| <b>Distrito Federal</b>       | 3.78%<br>(3.43% - 4.16%) | 2.86%<br>(2.57% - 3.14%) | 2.18%<br>(1.97% - 2.41%) | 1.82%<br>(1.61% - 2.04%) | 0.42%<br>(0.30% - 0.56%) | 0.19%<br>(0.11% - 0.30%) | 0.08%<br>(0.02% - 0.16%) | 0.04%<br>(0.00% - 0.10%) | 0.00%<br>(0.00% - 0.00%) | 0.00%<br>(0.00% - 0.00%) | 0.00%<br>(0.00% - 0.00%) | 0.00%<br>(0.00% - 0.00%) |
| <b>Espírito Santo</b>         | 2.42%<br>(2.23% - 2.61%) | 2.01%<br>(1.84% - 2.19%) | 1.57%<br>(1.45% - 1.71%) | 1.28%<br>(1.17% - 1.38%) | 0.07%<br>(0.04% - 0.09%) | 0.03%<br>(0.01% - 0.04%) | 0.00%<br>(0.00% - 0.01%) | 0.00%<br>(0.00% - 0.00%) | 0.00%<br>(0.00% - 0.00%) | 0.00%<br>(0.00% - 0.00%) | 0.00%<br>(0.00% - 0.00%) | 0.00%<br>(0.00% - 0.00%) |
| <b>Goiás</b>                  | 2.78%<br>(2.57% - 2.99%) | 2.12%<br>(1.96% - 2.30%) | 1.65%<br>(1.52% - 1.80%) | 1.36%<br>(1.26% - 1.49%) | 0.09%<br>(0.06% - 0.12%) | 0.03%<br>(0.01% - 0.05%) | 0.00%<br>(0.00% - 0.01%) | 0.00%<br>(0.00% - 0.00%) | 0.00%<br>(0.00% - 0.00%) | 0.00%<br>(0.00% - 0.00%) | 0.00%<br>(0.00% - 0.00%) | 0.00%<br>(0.00% - 0.00%) |
| <b>Maranhão</b>               | 5.45%<br>(5.02% - 5.87%) | 3.71%<br>(3.39% - 4.08%) | 2.73%<br>(2.50% - 2.96%) | 2.25%<br>(2.07% - 2.46%) | 0.62%<br>(0.49% - 0.76%) | 0.20%<br>(0.15% - 0.27%) | 0.07%<br>(0.04% - 0.10%) | 0.02%<br>(0.01% - 0.04%) | 0.00%<br>(0.00% - 0.00%) | 0.00%<br>(0.00% - 0.00%) | 0.00%<br>(0.00% - 0.00%) | 0.00%<br>(0.00% - 0.00%) |
| <b>Minas Gerais</b>           | 2.34%<br>(2.13% - 2.56%) | 1.58%<br>(1.44% - 1.73%) | 1.28%<br>(1.17% - 1.40%) | 1.04%<br>(0.95% - 1.14%) | 0.02%<br>(0.01% - 0.03%) | 0.00%<br>(0.00% - 0.01%) | 0.00%<br>(0.00% - 0.00%) | 0.00%<br>(0.00% - 0.00%) | 0.00%<br>(0.00% - 0.00%) | 0.00%<br>(0.00% - 0.00%) | 0.00%<br>(0.00% - 0.00%) | 0.00%<br>(0.00% - 0.00%) |
| <b>Mato Grosso do Sul</b>     | 2.97%<br>(2.73% - 3.24%) | 2.37%<br>(2.17% - 2.59%) | 1.86%<br>(1.70% - 2.03%) | 1.48%<br>(1.36% - 1.62%) | 0.07%<br>(0.04% - 0.10%) | 0.03%<br>(0.01% - 0.05%) | 0.00%<br>(0.00% - 0.01%) | 0.00%<br>(0.00% - 0.00%) | 0.00%<br>(0.00% - 0.00%) | 0.00%<br>(0.00% - 0.00%) | 0.00%<br>(0.00% - 0.00%) | 0.00%<br>(0.00% - 0.00%) |
| <b>Mato Grosso</b>            | 2.96%<br>(2.75% - 3.20%) | 2.33%<br>(2.15% - 2.51%) | 1.75%<br>(1.61% - 1.89%) | 1.44%<br>(1.32% - 1.56%) | 0.08%<br>(0.05% - 0.11%) | 0.03%<br>(0.02% - 0.05%) | 0.00%<br>(0.00% - 0.01%) | 0.00%<br>(0.00% - 0.00%) | 0.00%<br>(0.00% - 0.00%) | 0.00%<br>(0.00% - 0.00%) | 0.00%<br>(0.00% - 0.00%) | 0.00%<br>(0.00% - 0.00%) |
| <b>Pará</b>                   | 2.98%<br>(2.67% - 3.38%) | 2.06%<br>(1.89% - 2.25%) | 1.66%<br>(1.54% - 1.80%) | 1.37%<br>(1.26% - 1.50%) | 0.10%<br>(0.06% - 0.15%) | 0.03%<br>(0.01% - 0.05%) | 0.01%<br>(0.00% - 0.02%) | 0.00%<br>(0.00% - 0.00%) | 0.00%<br>(0.00% - 0.00%) | 0.00%<br>(0.00% - 0.00%) | 0.00%<br>(0.00% - 0.00%) | 0.00%<br>(0.00% - 0.00%) |
| <b>Paraíba</b>                | 3.25%<br>(3.00% - 3.51%) | 2.74%<br>(2.53% - 2.97%) | 2.07%<br>(1.91% - 2.25%) | 1.71%<br>(1.57% - 1.87%) | 0.17%<br>(0.13% - 0.21%) | 0.10%<br>(0.07% - 0.13%) | 0.02%<br>(0.01% - 0.04%) | 0.00%<br>(0.00% - 0.01%) | 0.00%<br>(0.00% - 0.00%) | 0.00%<br>(0.00% - 0.00%) | 0.00%<br>(0.00% - 0.00%) | 0.00%<br>(0.00% - 0.00%) |
| <b>Paraná</b>                 | 0.74%<br>(0.65% - 0.85%) | 0.47%<br>(0.40% - 0.55%) | 0.36%<br>(0.31% - 0.42%) | 0.28%<br>(0.25% - 0.31%) | 0.01%<br>(0.00% - 0.02%) | 0.00%<br>(0.00% - 0.00%) | 0.00%<br>(0.00% - 0.00%) | 0.00%<br>(0.00% - 0.00%) | 0.00%<br>(0.00% - 0.00%) | 0.00%<br>(0.00% - 0.00%) | 0.00%<br>(0.00% - 0.00%) | 0.00%<br>(0.00% - 0.00%) |
| <b>Pernambuco</b>             | 2.63%<br>(2.45% - 2.82%) | 1.90%<br>(1.75% - 2.06%) | 1.36%<br>(1.26% - 1.47%) | 1.12%<br>(1.03% - 1.21%) | 0.12%<br>(0.09% - 0.14%) | 0.02%<br>(0.01% - 0.04%) | 0.00%<br>(0.00% - 0.00%) | 0.00%<br>(0.00% - 0.00%) | 0.00%<br>(0.00% - 0.00%) | 0.00%<br>(0.00% - 0.00%) | 0.00%<br>(0.00% - 0.00%) | 0.00%<br>(0.00% - 0.00%) |
| <b>Piauí</b>                  | 2.40%<br>(2.23% - 2.60%) | 1.90%<br>(1.71% - 2.10%) | 1.41%<br>(1.28% - 1.56%) | 1.15%<br>(1.04% - 1.26%) | 0.08%<br>(0.06% - 0.10%) | 0.01%<br>(0.00% - 0.02%) | 0.00%<br>(0.00% - 0.00%) | 0.00%<br>(0.00% - 0.00%) | 0.00%<br>(0.00% - 0.00%) | 0.00%<br>(0.00% - 0.00%) | 0.00%<br>(0.00% - 0.00%) | 0.00%<br>(0.00% - 0.00%) |
| <b>Rio de Janeiro</b>         | 4.94%<br>(4.58% - 5.30%) | 3.41%<br>(3.16% - 3.70%) | 2.72%<br>(2.51% - 2.95%) | 2.34%<br>(2.16% - 2.56%) | 0.45%<br>(0.35% - 0.56%) | 0.15%<br>(0.10% - 0.19%) | 0.05%<br>(0.02% - 0.09%) | 0.02%<br>(0.00% - 0.04%) | 0.00%<br>(0.00% - 0.00%) | 0.00%<br>(0.00% - 0.00%) | 0.00%<br>(0.00% - 0.00%) | 0.00%<br>(0.00% - 0.00%) |
| <b>Rio Grande do Norte</b>    | 2.07%<br>(1.92% - 2.23%) | 1.68%<br>(1.55% - 1.84%) | 1.25%<br>(1.14% - 1.37%) | 1.07%<br>(0.97% - 1.18%) | 0.06%<br>(0.04% - 0.08%) | 0.01%<br>(0.00% - 0.02%) | 0.00%<br>(0.00% - 0.00%) | 0.00%<br>(0.00% - 0.00%) | 0.00%<br>(0.00% - 0.00%) | 0.00%<br>(0.00% - 0.00%) | 0.00%<br>(0.00% - 0.00%) | 0.00%<br>(0.00% - 0.00%) |
| <b>Rondônia</b>               | 3.08%<br>(2.86% - 3.34%) | 2.50%<br>(2.31% - 2.70%) | 1.95%<br>(1.79% - 2.12%) | 1.60%<br>(1.47% - 1.74%) | 0.12%<br>(0.09% - 0.15%) | 0.06%<br>(0.04% - 0.08%) | 0.01%<br>(0.00% - 0.03%) | 0.00%<br>(0.00% - 0.01%) | 0.00%<br>(0.00% - 0.00%) | 0.00%<br>(0.00% - 0.00%) | 0.00%<br>(0.00% - 0.00%) | 0.00%<br>(0.00% - 0.00%) |

Table S8b. Estimated overall, severe, and extreme **wasting prevalence (%)** in children under 5 years, both sexes, in 1990, 2000, 2010, and 2020.

| Location                     | Total                       |                           |                          |                          | Severe                   |                          |                          |                          | Extreme                  |                          |                          |                          |
|------------------------------|-----------------------------|---------------------------|--------------------------|--------------------------|--------------------------|--------------------------|--------------------------|--------------------------|--------------------------|--------------------------|--------------------------|--------------------------|
|                              | 1990                        | 2000                      | 2010                     | 2020                     | 1990                     | 2000                     | 2010                     | 2020                     | 1990                     | 2000                     | 2010                     | 2020                     |
| Roraima                      | 2.89%<br>(2.67% - 3.11%)    | 2.31%<br>(2.14% - 2.50%)  | 1.79%<br>(1.65% - 1.94%) | 1.54%<br>(1.41% - 1.68%) | 0.14%<br>(0.10% - 0.17%) | 0.07%<br>(0.04% - 0.09%) | 0.01%<br>(0.00% - 0.03%) | 0.00%<br>(0.00% - 0.01%) | 0.00%<br>(0.00% - 0.00%) | 0.00%<br>(0.00% - 0.00%) | 0.00%<br>(0.00% - 0.00%) | 0.00%<br>(0.00% - 0.00%) |
| Rio Grande do Sul            | 1.87%<br>(1.73% - 2.03%)    | 1.63%<br>(1.50% - 1.78%)  | 1.30%<br>(1.20% - 1.41%) | 1.11%<br>(1.02% - 1.20%) | 0.02%<br>(0.01% - 0.03%) | 0.01%<br>(0.00% - 0.02%) | 0.00%<br>(0.00% - 0.00%) | 0.00%<br>(0.00% - 0.00%) | 0.00%<br>(0.00% - 0.00%) | 0.00%<br>(0.00% - 0.00%) | 0.00%<br>(0.00% - 0.00%) | 0.00%<br>(0.00% - 0.00%) |
| Santa Catarina               | 1.89%<br>(1.74% - 2.04%)    | 1.70%<br>(1.55% - 1.86%)  | 1.31%<br>(1.20% - 1.41%) | 1.07%<br>(0.98% - 1.17%) | 0.02%<br>(0.01% - 0.04%) | 0.01%<br>(0.00% - 0.02%) | 0.00%<br>(0.00% - 0.00%) | 0.00%<br>(0.00% - 0.00%) | 0.00%<br>(0.00% - 0.00%) | 0.00%<br>(0.00% - 0.00%) | 0.00%<br>(0.00% - 0.00%) | 0.00%<br>(0.00% - 0.00%) |
| Sergipe                      | 5.25%<br>(4.84% - 5.71%)    | 3.49%<br>(3.22% - 3.79%)  | 2.50%<br>(2.30% - 2.72%) | 2.11%<br>(1.95% - 2.29%) | 0.42%<br>(0.32% - 0.53%) | 0.12%<br>(0.08% - 0.17%) | 0.02%<br>(0.00% - 0.04%) | 0.00%<br>(0.00% - 0.01%) | 0.00%<br>(0.00% - 0.00%) | 0.00%<br>(0.00% - 0.00%) | 0.00%<br>(0.00% - 0.00%) | 0.00%<br>(0.00% - 0.00%) |
| São Paulo                    | 3.18%<br>(2.95% - 3.46%)    | 2.26%<br>(2.09% - 2.47%)  | 1.77%<br>(1.61% - 1.94%) | 1.53%<br>(1.40% - 1.67%) | 0.17%<br>(0.12% - 0.23%) | 0.06%<br>(0.03% - 0.09%) | 0.01%<br>(0.00% - 0.03%) | 0.00%<br>(0.00% - 0.02%) | 0.00%<br>(0.00% - 0.00%) | 0.00%<br>(0.00% - 0.00%) | 0.00%<br>(0.00% - 0.00%) | 0.00%<br>(0.00% - 0.00%) |
| Tocantins                    | 3.41%<br>(3.15% - 3.69%)    | 2.86%<br>(2.65% - 3.08%)  | 2.05%<br>(1.90% - 2.23%) | 1.64%<br>(1.51% - 1.78%) | 0.17%<br>(0.13% - 0.22%) | 0.11%<br>(0.08% - 0.14%) | 0.02%<br>(0.01% - 0.03%) | 0.00%<br>(0.00% - 0.01%) | 0.00%<br>(0.00% - 0.00%) | 0.00%<br>(0.00% - 0.00%) | 0.00%<br>(0.00% - 0.00%) | 0.00%<br>(0.00% - 0.00%) |
| Paraguay                     | 0.54%<br>(0.36% - 0.65%)    | 0.99%<br>(0.90% - 1.08%)  | 1.70%<br>(1.58% - 1.82%) | 1.12%<br>(1.01% - 1.29%) | 0.00%<br>(0.00% - 0.00%) | 0.00%<br>(0.00% - 0.00%) | 0.07%<br>(0.06% - 0.09%) | 0.04%<br>(0.03% - 0.05%) | 0.00%<br>(0.00% - 0.00%) | 0.00%<br>(0.00% - 0.00%) | 0.00%<br>(0.00% - 0.00%) | 0.00%<br>(0.00% - 0.00%) |
| North Africa and Middle East | 9.42%<br>(9.26% - 9.59%)    | 8.69%<br>(8.56% - 8.82%)  | 7.31%<br>(7.19% - 7.44%) | 5.64%<br>(5.52% - 5.77%) | 2.51%<br>(2.41% - 2.59%) | 2.23%<br>(2.15% - 2.29%) | 1.60%<br>(1.54% - 1.66%) | 0.93%<br>(0.88% - 0.98%) | 0.40%<br>(0.37% - 0.43%) | 0.32%<br>(0.29% - 0.35%) | 0.17%<br>(0.15% - 0.19%) | 0.05%<br>(0.04% - 0.07%) |
| North Africa and Middle East | 9.42%<br>(9.26% - 9.59%)    | 8.69%<br>(8.56% - 8.82%)  | 7.31%<br>(7.19% - 7.44%) | 5.64%<br>(5.52% - 5.77%) | 2.51%<br>(2.41% - 2.59%) | 2.23%<br>(2.15% - 2.29%) | 1.60%<br>(1.54% - 1.66%) | 0.93%<br>(0.88% - 0.98%) | 0.40%<br>(0.37% - 0.43%) | 0.32%<br>(0.29% - 0.35%) | 0.17%<br>(0.15% - 0.19%) | 0.05%<br>(0.04% - 0.07%) |
| Algeria                      | 10.82%<br>(10.22% - 11.44%) | 8.85%<br>(8.40% - 9.27%)  | 5.91%<br>(5.58% - 6.26%) | 4.29%<br>(3.93% - 4.62%) | 2.94%<br>(2.65% - 3.25%) | 2.06%<br>(1.86% - 2.26%) | 0.94%<br>(0.82% - 1.08%) | 0.42%<br>(0.34% - 0.51%) | 0.32%<br>(0.25% - 0.40%) | 0.11%<br>(0.09% - 0.14%) | 0.04%<br>(0.03% - 0.06%) | 0.01%<br>(0.00% - 0.03%) |
| Bahrain                      | 6.69%<br>(6.12% - 7.31%)    | 4.97%<br>(4.49% - 5.49%)  | 3.58%<br>(3.21% - 3.94%) | 2.90%<br>(2.60% - 3.29%) | 1.18%<br>(0.96% - 1.44%) | 0.58%<br>(0.41% - 0.76%) | 0.14%<br>(0.07% - 0.24%) | 0.03%<br>(0.01% - 0.08%) | 0.00%<br>(0.00% - 0.00%) | 0.00%<br>(0.00% - 0.00%) | 0.00%<br>(0.00% - 0.00%) | 0.00%<br>(0.00% - 0.00%) |
| Egypt                        | 7.35%<br>(6.94% - 7.80%)    | 6.47%<br>(6.14% - 6.80%)  | 6.25%<br>(5.95% - 6.59%) | 4.55%<br>(4.18% - 4.88%) | 1.36%<br>(1.19% - 1.54%) | 1.12%<br>(0.99% - 1.25%) | 1.14%<br>(1.02% - 1.27%) | 0.54%<br>(0.45% - 0.64%) | 0.05%<br>(0.03% - 0.07%) | 0.05%<br>(0.03% - 0.07%) | 0.08%<br>(0.06% - 0.10%) | 0.01%<br>(0.00% - 0.03%) |
| Iran (Islamic Republic of)   | 9.29%<br>(8.74% - 9.91%)    | 4.48%<br>(5.64% - 6.26%)  | 3.52%<br>(4.14% - 4.83%) | 3.29%<br>(3.21% - 3.87%) | 2.31%<br>(2.02% - 2.62%) | 0.99%<br>(0.87% - 1.10%) | 0.54%<br>(0.44% - 0.64%) | 0.29%<br>(0.23% - 0.38%) | 0.27%<br>(0.20% - 0.36%) | 0.04%<br>(0.02% - 0.05%) | 0.01%<br>(0.01% - 0.02%) | 0.00%<br>(0.00% - 0.00%) |
| Iraq                         | 9.63%<br>(9.12% - 10.15%)   | 9.52%<br>(9.08% - 9.97%)  | 6.92%<br>(6.51% - 7.37%) | 4.58%<br>(4.26% - 4.89%) | 2.37%<br>(2.13% - 2.62%) | 2.39%<br>(2.18% - 2.61%) | 1.30%<br>(1.13% - 1.48%) | 0.47%<br>(0.36% - 0.57%) | 0.11%<br>(0.07% - 0.15%) | 0.12%<br>(0.09% - 0.16%) | 0.02%<br>(0.01% - 0.04%) | 0.00%<br>(0.00% - 0.00%) |
| Jordan                       | 4.14%<br>(3.82% - 4.42%)    | 3.13%<br>(2.91% - 3.39%)  | 2.44%<br>(2.26% - 2.64%) | 2.07%<br>(1.89% - 2.26%) | 0.35%<br>(0.28% - 0.43%) | 0.13%<br>(0.10% - 0.16%) | 0.03%<br>(0.02% - 0.05%) | 0.01%<br>(0.00% - 0.02%) | 0.00%<br>(0.00% - 0.00%) | 0.00%<br>(0.00% - 0.00%) | 0.00%<br>(0.00% - 0.00%) | 0.00%<br>(0.00% - 0.00%) |
| Kuwait                       | 4.34%<br>(4.03% - 4.65%)    | 2.98%<br>(2.78% - 3.20%)  | 2.12%<br>(1.97% - 2.26%) | 1.81%<br>(1.66% - 1.95%) | 0.30%<br>(0.21% - 0.40%) | 0.05%<br>(0.03% - 0.07%) | 0.02%<br>(0.01% - 0.03%) | 0.01%<br>(0.00% - 0.01%) | 0.00%<br>(0.00% - 0.00%) | 0.00%<br>(0.00% - 0.00%) | 0.00%<br>(0.00% - 0.00%) | 0.00%<br>(0.00% - 0.00%) |
| Lebanon                      | 7.01%<br>(6.43% - 7.58%)    | 5.41%<br>(5.00% - 5.83%)  | 4.39%<br>(4.00% - 4.79%) | 3.49%<br>(3.12% - 3.86%) | 1.20%<br>(0.97% - 1.45%) | 0.68%<br>(0.53% - 0.84%) | 0.38%<br>(0.25% - 0.51%) | 0.16%<br>(0.07% - 0.27%) | 0.01%<br>(0.00% - 0.04%) | 0.00%<br>(0.00% - 0.00%) | 0.00%<br>(0.00% - 0.00%) | 0.00%<br>(0.00% - 0.00%) |
| Libya                        | 6.05%<br>(5.55% - 6.60%)    | 4.99%<br>(4.57% - 5.40%)  | 5.13%<br>(4.70% - 5.55%) | 4.98%<br>(4.45% - 5.45%) | 0.87%<br>(0.69% - 1.06%) | 0.55%<br>(0.43% - 0.69%) | 0.61%<br>(0.48% - 0.76%) | 0.50%<br>(0.37% - 0.65%) | 0.01%<br>(0.00% - 0.03%) | 0.00%<br>(0.00% - 0.01%) | 0.01%<br>(0.00% - 0.02%) | 0.00%<br>(0.00% - 0.01%) |
| Morocco                      | 5.22%<br>(4.88% - 5.53%)    | 6.89%<br>(6.51% - 7.27%)  | 4.63%<br>(4.36% - 4.94%) | 2.67%<br>(2.47% - 2.93%) | 0.62%<br>(0.51% - 0.73%) | 1.30%<br>(1.14% - 1.46%) | 0.47%<br>(0.38% - 0.58%) | 0.09%<br>(0.07% - 0.11%) | 0.01%<br>(0.00% - 0.02%) | 0.04%<br>(0.02% - 0.06%) | 0.00%<br>(0.00% - 0.01%) | 0.00%<br>(0.00% - 0.00%) |
| Palestine                    | 5.67%<br>(5.36% - 6.00%)    | 5.30%<br>(5.08% - 5.55%)  | 3.77%<br>(3.52% - 4.01%) | 2.03%<br>(1.88% - 2.19%) | 0.74%<br>(0.63% - 0.86%) | 0.65%<br>(0.57% - 0.74%) | 0.19%<br>(0.15% - 0.24%) | 0.01%<br>(0.00% - 0.02%) | 0.00%<br>(0.00% - 0.00%) | 0.00%<br>(0.00% - 0.00%) | 0.00%<br>(0.00% - 0.00%) | 0.00%<br>(0.00% - 0.00%) |
| Oman                         | 10.85%<br>(10.22% - 11.52%) | 7.89%<br>(7.45% - 8.31%)  | 6.71%<br>(6.28% - 7.18%) | 5.66%<br>(5.20% - 6.13%) | 2.70%<br>(2.39% - 3.05%) | 1.43%<br>(1.26% - 1.61%) | 1.09%<br>(0.93% - 1.28%) | 0.75%<br>(0.59% - 0.92%) | 0.15%<br>(0.05% - 0.27%) | 0.00%<br>(0.00% - 0.01%) | 0.01%<br>(0.00% - 0.02%) | 0.00%<br>(0.00% - 0.01%) |
| Qatar                        | 2.90%<br>(2.65% - 3.17%)    | 2.24%<br>(2.05% - 2.44%)  | 1.79%<br>(1.62% - 1.96%) | 1.40%<br>(1.26% - 1.56%) | 0.16%<br>(0.12% - 0.21%) | 0.07%<br>(0.05% - 0.10%) | 0.02%<br>(0.00% - 0.04%) | 0.00%<br>(0.00% - 0.01%) | 0.00%<br>(0.00% - 0.00%) | 0.00%<br>(0.00% - 0.00%) | 0.00%<br>(0.00% - 0.00%) | 0.00%<br>(0.00% - 0.00%) |
| Saudi Arabia                 | 13.39%<br>(12.36% - 14.42%) | 9.94%<br>(9.15% - 10.74%) | 7.39%<br>(6.76% - 8.05%) | 5.52%<br>(4.98% - 6.04%) | 4.53%<br>(3.95% - 5.12%) | 2.76%<br>(2.37% - 3.19%) | 1.55%<br>(1.29% - 1.84%) | 0.79%<br>(0.61% - 1.00%) | 0.95%<br>(0.70% - 1.23%) | 0.32%<br>(0.21% - 0.47%) | 0.07%<br>(0.04% - 0.12%) | 0.01%<br>(0.00% - 0.03%) |

Table S8b. Estimated overall, severe, and extreme wasting prevalence (%) in children under 5 years, both sexes, in 1990, 2000, 2010, and 2020.

| Location                | Total             |                   |                   |                   | Severe            |                   |                  |                 | Extreme         |                 |                 |                 |
|-------------------------|-------------------|-------------------|-------------------|-------------------|-------------------|-------------------|------------------|-----------------|-----------------|-----------------|-----------------|-----------------|
|                         | 1990              | 2000              | 2010              | 2020              | 1990              | 2000              | 2010             | 2020            | 1990            | 2000            | 2010            | 2020            |
| Syrian Arab Republic    | 13.45%            | 11.00%            | 10.36%            | 10.42%            | 4.44%             | 3.18%             | 2.99%            | 2.98%           | 0.83%           | 0.36%           | 0.34%           | 0.34%           |
|                         | (12.62% - 14.31%) | (10.30% - 11.67%) | (9.72% - 11.01%)  | (9.71% - 11.20%)  | (3.93% - 4.96%)   | (2.82% - 3.55%)   | (2.64% - 3.35%)  | (2.60% - 3.41%) | (0.62% - 1.06%) | (0.24% - 0.49%) | (0.23% - 0.47%) | (0.21% - 0.49%) |
| Tunisia                 | 5.96%             | 4.40%             | 2.93%             | 2.25%             | 0.84%             | 0.33%             | 0.15%            | 0.07%           | 0.00%           | 0.00%           | 0.00%           | 0.00%           |
|                         | (5.55% - 6.38%)   | (4.07% - 4.71%)   | (2.73% - 3.15%)   | (2.07% - 2.43%)   | (0.70% - 0.99%)   | (0.25% - 0.43%)   | (0.11% - 0.18%)  | (0.05% - 0.09%) | (0.00% - 0.00%) | (0.00% - 0.00%) | (0.00% - 0.00%) | (0.00% - 0.00%) |
| Turkey                  | 3.71%             | 2.31%             | 1.13%             | 0.88%             | 0.31%             | 0.10%             | 0.01%            | 0.00%           | 0.00%           | 0.00%           | 0.00%           | 0.00%           |
|                         | (3.46% - 4.00%)   | (2.15% - 2.47%)   | (0.97% - 1.25%)   | (0.73% - 0.96%)   | (0.25% - 0.37%)   | (0.08% - 0.13%)   | (0.00% - 0.02%)  | (0.00% - 0.01%) | (0.00% - 0.01%) | (0.00% - 0.00%) | (0.00% - 0.00%) | (0.00% - 0.00%) |
| United Arab Emirates    | 13.34%            | 10.04%            | 7.27%             | 5.58%             | 3.92%             | 2.32%             | 1.19%            | 0.62%           | 0.55%           | 0.09%           | 0.00%           | 0.00%           |
|                         | (12.35% - 14.38%) | (9.26% - 10.87%)  | (6.63% - 7.91%)   | (5.07% - 6.16%)   | (3.37% - 4.51%)   | (1.97% - 2.73%)   | (0.96% - 1.45%)  | (0.46% - 0.82%) | (0.35% - 0.78%) | (0.04% - 0.17%) | (0.00% - 0.02%) | (0.00% - 0.00%) |
| Yemen                   | 17.49%            | 17.43%            | 16.04%            | 15.41%            | 5.64%             | 5.25%             | 3.87%            | 3.32%           | 1.15%           | 0.94%           | 0.41%           | 0.23%           |
|                         | (16.85% - 18.18%) | (16.92% - 17.98%) | (15.60% - 16.49%) | (14.75% - 16.06%) | (5.25% - 6.05%)   | (4.93% - 5.58%)   | (3.64% - 4.11%)  | (3.00% - 3.67%) | (0.99% - 1.33%) | (0.82% - 1.07%) | (0.35% - 0.48%) | (0.17% - 0.31%) |
| Afghanistan             | 10.15%            | 10.68%            | 8.27%             | 6.08%             | 2.67%             | 2.94%             | 1.80%            | 0.95%           | 0.14%           | 0.23%           | 0.01%           | 0.00%           |
|                         | (9.61% - 10.76%)  | (10.27% - 11.14%) | (7.87% - 8.69%)   | (5.66% - 6.48%)   | (2.38% - 2.99%)   | (2.72% - 3.19%)   | (1.63% - 2.00%)  | (0.79% - 1.11%) | (0.07% - 0.25%) | (0.15% - 0.32%) | (0.00% - 0.03%) | (0.00% - 0.00%) |
| Sudan                   | 19.77%            | 19.36%            | 16.43%            | 12.41%            | 8.01%             | 7.42%             | 5.47%            | 3.29%           | 2.39%           | 2.03%           | 1.13%           | 0.33%           |
|                         | (19.16% - 20.40%) | (18.61% - 20.09%) | (15.66% - 17.12%) | (11.69% - 13.08%) | (7.55% - 8.51%)   | (6.90% - 7.96%)   | (5.04% - 5.91%)  | (2.92% - 3.65%) | (2.15% - 2.65%) | (1.78% - 2.30%) | (0.95% - 1.33%) | (0.24% - 0.45%) |
| South Asia              | 22.56%            | 20.48%            | 19.70%            | 14.81%            | 8.38%             | 7.15%             | 6.85%            | 4.06%           | 2.29%           | 1.75%           | 1.62%           | 0.57%           |
|                         | (22.38% - 22.75%) | (20.31% - 20.65%) | (19.55% - 19.85%) | (14.64% - 14.97%) | (8.25% - 8.53%)   | (7.03% - 7.27%)   | (6.75% - 6.95%)  | (3.97% - 4.16%) | (2.22% - 2.37%) | (1.70% - 1.81%) | (1.58% - 1.67%) | (0.54% - 0.60%) |
| South Asia              | 22.56%            | 20.48%            | 19.70%            | 14.81%            | 8.38%             | 7.15%             | 6.85%            | 4.06%           | 2.29%           | 1.75%           | 1.62%           | 0.57%           |
|                         | (22.38% - 22.75%) | (20.31% - 20.65%) | (19.55% - 19.85%) | (14.64% - 14.97%) | (8.25% - 8.53%)   | (7.03% - 7.27%)   | (6.75% - 6.95%)  | (3.97% - 4.16%) | (2.22% - 2.37%) | (1.70% - 1.81%) | (1.58% - 1.67%) | (0.54% - 0.60%) |
| Bangladesh              | 18.44%            | 15.10%            | 14.83%            | 11.14%            | 6.30%             | 4.92%             | 4.32%            | 2.12%           | 1.40%           | 0.96%           | 0.61%           | 0.02%           |
|                         | (17.84% - 19.00%) | (14.71% - 15.48%) | (14.45% - 15.19%) | (10.59% - 11.71%) | (5.91% - 6.68%)   | (4.70% - 5.16%)   | (4.10% - 4.54%)  | (1.90% - 2.37%) | (1.22% - 1.57%) | (0.87% - 1.07%) | (0.52% - 0.70%) | (0.00% - 0.04%) |
| Bhutan                  | 8.24%             | 6.68%             | 5.80%             | 3.80%             | 1.33%             | 0.94%             | 0.85%            | 0.30%           | 0.00%           | 0.01%           | 0.04%           | 0.00%           |
|                         | (7.65% - 8.88%)   | (6.29% - 7.13%)   | (5.49% - 6.12%)   | (3.54% - 4.11%)   | (1.11% - 1.58%)   | (0.80% - 1.12%)   | (0.74% - 0.97%)  | (0.24% - 0.36%) | (0.00% - 0.01%) | (0.00% - 0.03%) | (0.02% - 0.06%) | (0.00% - 0.00%) |
| India                   | 24.31%            | 22.11%            | 21.26%            | 16.06%            | 9.31%             | 7.95%             | 7.72%            | 4.64%           | 2.68%           | 2.05%           | 1.93%           | 0.69%           |
|                         | (24.12% - 24.51%) | (21.94% - 22.28%) | (21.10% - 21.42%) | (15.90% - 16.22%) | (9.14% - 9.48%)   | (7.82% - 8.08%)   | (7.60% - 7.84%)  | (4.54% - 4.74%) | (2.59% - 2.78%) | (1.98% - 2.12%) | (1.87% - 1.99%) | (0.66% - 0.73%) |
| Other Union Territories | 35.95%            | 31.93%            | 24.59%            | 18.18%            | 19.06%            | 14.88%            | 8.80%            | 4.75%           | 8.45%           | 5.54%           | 2.19%           | 0.55%           |
|                         | (35.09% - 36.88%) | (31.14% - 32.76%) | (23.77% - 25.45%) | (17.41% - 18.95%) | (17.93% - 20.33%) | (13.93% - 15.93%) | (8.12% - 9.53%)  | (4.28% - 5.21%) | (7.45% - 9.63%) | (4.80% - 6.37%) | (1.81% - 2.61%) | (0.39% - 0.73%) |
| Andhra Pradesh          | 25.22%            | 22.56%            | 20.23%            | 14.83%            | 9.74%             | 7.93%             | 6.96%            | 3.89%           | 2.75%           | 1.88%           | 1.54%           | 0.38%           |
|                         | (24.40% - 26.04%) | (21.97% - 23.16%) | (19.80% - 20.70%) | (14.33% - 15.34%) | (9.03% - 10.46%)  | (7.47% - 8.47%)   | (6.64% - 7.31%)  | (3.63% - 4.17%) | (2.38% - 3.15%) | (1.66% - 2.15%) | (1.40% - 1.69%) | (0.30% - 0.47%) |
| Arunachal Pradesh       | 19.84%            | 19.81%            | 20.49%            | 16.42%            | 7.81%             | 7.48%             | 7.94%            | 5.43%           | 2.32%           | 2.03%           | 2.19%           | 1.08%           |
|                         | (18.93% - 20.79%) | (18.99% - 20.68%) | (19.83% - 21.18%) | (15.77% - 17.08%) | (7.19% - 8.48%)   | (6.92% - 8.10%)   | (7.47% - 8.47%)  | (5.00% - 5.87%) | (2.02% - 2.67%) | (1.77% - 2.33%) | (1.95% - 2.46%) | (0.90% - 1.28%) |
| Assam                   | 16.72%            | 20.08%            | 20.08%            | 14.98%            | 5.00%             | 7.34%             | 7.86%            | 4.72%           | 0.90%           | 1.83%           | 2.19%           | 0.81%           |
|                         | (15.90% - 17.61%) | (19.23% - 20.93%) | (19.45% - 20.78%) | (14.38% - 15.61%) | (4.51% - 5.51%)   | (6.74% - 8.00%)   | (7.33% - 8.45%)  | (4.32% - 5.14%) | (0.72% - 1.08%) | (1.54% - 2.16%) | (1.90% - 2.54%) | (0.64% - 0.99%) |
| Bihar                   | 25.81%            | 24.47%            | 22.04%            | 16.21%            | 10.88%            | 9.97%             | 8.19%            | 4.77%           | 3.51%           | 3.05%           | 2.16%           | 0.75%           |
|                         | (24.95% - 26.71%) | (23.65% - 25.24%) | (21.45% - 22.67%) | (15.61% - 16.81%) | (10.09% - 11.64%) | (9.32% - 10.59%)  | (7.74% - 8.65%)  | (4.42% - 5.12%) | (3.08% - 3.95%) | (2.71% - 3.40%) | (1.94% - 2.39%) | (0.62% - 0.88%) |
| Chhattisgarh            | 27.19%            | 24.87%            | 25.24%            | 19.44%            | 11.21%            | 9.48%             | 10.15%           | 6.40%           | 3.74%           | 2.82%           | 3.08%           | 1.32%           |
|                         | (26.32% - 28.14%) | (24.01% - 25.75%) | (24.59% - 25.92%) | (18.77% - 20.09%) | (10.47% - 12.06%) | (8.81% - 10.17%)  | (9.59% - 10.73%) | (5.96% - 6.86%) | (3.35% - 4.21%) | (2.50% - 3.16%) | (2.78% - 3.40%) | (1.13% - 1.52%) |
| Delhi                   | 20.78%            | 19.41%            | 17.59%            | 13.02%            | 7.39%             | 6.97%             | 6.08%            | 3.54%           | 1.76%           | 1.67%           | 1.34%           | 0.37%           |
|                         | (19.97% - 21.61%) | (18.68% - 20.22%) | (16.90% - 18.29%) | (12.35% - 13.67%) | (6.82% - 8.02%)   | (6.47% - 7.55%)   | (5.62% - 6.56%)  | (3.18% - 3.91%) | (1.49% - 2.08%) | (1.42% - 1.95%) | (1.13% - 1.56%) | (0.25% - 0.50%) |
| Goa                     | 20.32%            | 18.33%            | 18.12%            | 16.43%            | 6.15%             | 5.47%             | 6.10%            | 5.34%           | 1.06%           | 0.91%           | 1.30%           | 1.03%           |
|                         | (19.58% - 21.04%) | (17.66% - 19.01%) | (17.45% - 18.81%) | (15.64% - 17.28%) | (5.63% - 6.68%)   | (5.00% - 5.98%)   | (5.59% - 6.66%)  | (4.76% - 5.95%) | (0.83% - 1.29%) | (0.71% - 1.14%) | (1.05% - 1.57%) | (0.76% - 1.34%) |
| Gujarat                 | 27.19%            | 24.97%            | 22.28%            | 17.27%            | 10.65%            | 9.13%             | 7.84%            | 5.09%           | 3.05%           | 2.30%           | 1.87%           | 0.83%           |
|                         | (26.41% - 27.94%) | (24.36% - 25.61%) | (21.79% - 22.75%) | (16.72% - 17.78%) | (9.95% - 11.41%)  | (8.61% - 9.68%)   | (7.47% - 8.23%)  | (4.78% - 5.42%) | (2.67% - 3.45%) | (2.05% - 2.58%) | (1.70% - 2.06%) | (0.71% - 0.95%) |
| Haryana                 | 13.69%            | 15.80%            | 22.60%            | 18.19%            | 3.69%             | 4.90%             | 9.44%            | 6.47%           | 0.57%           | 0.90%           | 2.91%           | 1.49%           |
|                         | (13.07% - 14.31%) | (15.18% - 16.48%) | (22.00% - 23.18%) | (17.60% - 18.79%) | (3.37% - 4.01%)   | (4.54% - 5.28%)   | (8.97% - 9.95%)  | (6.05% - 6.90%) | (0.48% - 0.67%) | (0.77% - 1.05%) | (2.64% - 3.21%) | (1.30% - 1.71%) |
| Himachal Pradesh        | 22.81%            | 19.16%            | 16.38%            | 11.57%            | 9.09%             | 6.48%             | 5.01%            | 2.76%           | 2.63%           | 1.38%           | 0.81%           | 0.12%           |
|                         | (21.84% - 23.78%) | (18.35% - 20.01%) | (15.62% - 17.19%) | (10.95% - 12.21%) | (8.32% - 9.95%)   | (5.90% - 7.11%)   | (4.54% - 5.50%)  | (2.45% - 3.10%) | (2.21% - 3.14%) | (1.13% - 1.69%) | (0.62% - 1.02%) | (0.05% - 0.22%) |



**Table S8b. Estimated overall, severe, and extreme wasting prevalence (%) in children under 5 years, both sexes, in 1990, 2000, 2010, and 2020.**

| Location                   | Total             |                   |                   |                   | Severe            |                   |                   |                 | Extreme         |                 |                 |                 |
|----------------------------|-------------------|-------------------|-------------------|-------------------|-------------------|-------------------|-------------------|-----------------|-----------------|-----------------|-----------------|-----------------|
|                            | 1990              | 2000              | 2010              | 2020              | 1990              | 2000              | 2010              | 2020            | 1990            | 2000            | 2010            | 2020            |
| Jammu & Kashmir and Ladakh | 18.14%            | 14.85%            | 12.34%            | 9.99%             | 5.74%             | 4.28%             | 3.36%             | 2.46%           | 1.09%           | 0.60%           | 0.32%           | 0.14%           |
|                            | (17.41% - 18.91%) | (14.25% - 15.45%) | (11.82% - 12.88%) | (9.56% - 10.46%)  | (5.28% - 6.25%)   | (3.94% - 4.59%)   | (3.09% - 3.66%)   | (2.24% - 2.69%) | (0.91% - 1.31%) | (0.49% - 0.71%) | (0.24% - 0.42%) | (0.09% - 0.19%) |
| Jharkhand                  | 36.95%            | 34.90%            | 28.90%            | 20.59%            | 19.64%            | 17.49%            | 12.38%            | 6.53%           | 8.61%           | 7.11%           | 4.04%           | 1.26%           |
|                            | (35.96% - 38.05%) | (33.99% - 35.82%) | (28.07% - 29.73%) | (19.85% - 21.40%) | (18.22% - 21.14%) | (16.33% - 18.73%) | (11.52% - 13.22%) | (6.00% - 7.07%) | (7.53% - 9.82%) | (6.26% - 8.03%) | (3.54% - 4.54%) | (1.04% - 1.48%) |
| Karnataka                  | 21.98%            | 21.15%            | 22.42%            | 17.69%            | 6.96%             | 6.82%             | 8.18%             | 5.32%           | 1.47%           | 1.46%           | 2.03%           | 0.86%           |
|                            | (21.31% - 22.65%) | (20.55% - 21.73%) | (21.93% - 22.87%) | (17.12% - 18.27%) | (6.52% - 7.41%)   | (6.43% - 7.23%)   | (7.82% - 8.55%)   | (4.94% - 5.70%) | (1.29% - 1.67%) | (1.29% - 1.63%) | (1.86% - 2.21%) | (0.72% - 1.02%) |
| Kerala                     | 17.27%            | 16.33%            | 17.95%            | 15.20%            | 5.13%             | 4.79%             | 5.88%             | 4.40%           | 0.90%           | 0.75%           | 1.17%           | 0.60%           |
|                            | (16.61% - 17.95%) | (15.79% - 16.89%) | (17.49% - 18.44%) | (14.65% - 15.79%) | (4.75% - 5.53%)   | (4.49% - 5.15%)   | (5.57% - 6.22%)   | (4.06% - 4.77%) | (0.76% - 1.06%) | (0.64% - 0.89%) | (1.03% - 1.32%) | (0.47% - 0.75%) |
| Madhya Pradesh             | 27.99%            | 26.32%            | 26.02%            | 17.32%            | 10.61%            | 9.32%             | 9.63%             | 4.55%           | 2.86%           | 2.24%           | 2.44%           | 0.51%           |
|                            | (27.14% - 28.79%) | (25.73% - 26.95%) | (25.54% - 26.51%) | (16.78% - 17.90%) | (9.84% - 11.39%)  | (8.82% - 9.86%)   | (9.17% - 10.08%)  | (4.22% - 4.91%) | (2.50% - 3.27%) | (2.00% - 2.51%) | (2.21% - 2.68%) | (0.40% - 0.63%) |
| Maharashtra                | 27.31%            | 26.46%            | 25.06%            | 19.47%            | 9.57%             | 9.63%             | 9.86%             | 6.04%           | 2.29%           | 2.39%           | 2.72%           | 1.06%           |
|                            | (26.53% - 28.02%) | (25.88% - 27.04%) | (24.56% - 25.58%) | (18.89% - 20.07%) | (8.91% - 10.21%)  | (9.12% - 10.23%)  | (9.39% - 10.37%)  | (5.64% - 6.46%) | (1.97% - 2.61%) | (2.13% - 2.71%) | (2.46% - 3.00%) | (0.89% - 1.24%) |
| Manipur                    | 11.08%            | 10.25%            | 10.93%            | 8.42%             | 2.61%             | 2.28%             | 2.77%             | 1.73%           | 0.26%           | 0.13%           | 0.16%           | 0.02%           |
|                            | (10.61% - 11.57%) | (9.79% - 10.69%)  | (10.49% - 11.36%) | (8.08% - 8.84%)   | (2.38% - 2.86%)   | (2.07% - 2.49%)   | (2.54% - 2.99%)   | (1.57% - 1.92%) | (0.20% - 0.33%) | (0.08% - 0.17%) | (0.09% - 0.23%) | (0.00% - 0.06%) |
| Meghalaya                  | 28.07%            | 25.77%            | 22.76%            | 16.01%            | 13.69%            | 11.18%            | 9.11%             | 4.93%           | 5.39%           | 3.74%           | 2.67%           | 0.84%           |
|                            | (27.10% - 29.13%) | (24.82% - 26.82%) | (21.92% - 23.62%) | (15.35% - 16.75%) | (12.71% - 14.76%) | (10.29% - 12.19%) | (8.40% - 9.84%)   | (4.51% - 5.41%) | (4.68% - 6.19%) | (3.18% - 4.40%) | (2.29% - 3.08%) | (0.67% - 1.05%) |
| Mizoram                    | 14.42%            | 14.09%            | 14.08%            | 10.03%            | 5.19%             | 4.57%             | 4.49%             | 2.43%           | 1.49%           | 0.96%           | 0.82%           | 0.14%           |
|                            | (13.81% - 15.06%) | (13.58% - 14.67%) | (13.71% - 14.48%) | (9.66% - 10.41%)  | (4.73% - 5.67%)   | (4.23% - 4.94%)   | (4.28% - 4.75%)   | (2.25% - 2.61%) | (1.25% - 1.76%) | (0.82% - 1.13%) | (0.73% - 0.92%) | (0.11% - 0.19%) |
| Nagaland                   | 17.84%            | 15.24%            | 13.89%            | 11.20%            | 6.29%             | 4.76%             | 4.16%             | 2.87%           | 1.43%           | 0.80%           | 0.60%           | 0.21%           |
|                            | (17.02% - 18.72%) | (14.51% - 16.01%) | (13.37% - 14.42%) | (10.72% - 11.69%) | (5.71% - 6.94%)   | (4.35% - 5.25%)   | (3.83% - 4.48%)   | (2.62% - 3.13%) | (1.16% - 1.76%) | (0.63% - 1.01%) | (0.47% - 0.73%) | (0.14% - 0.30%) |
| Odisha                     | 23.49%            | 21.53%            | 19.94%            | 14.72%            | 8.46%             | 7.25%             | 6.59%             | 3.86%           | 2.19%           | 1.66%           | 1.42%           | 0.44%           |
|                            | (22.63% - 24.33%) | (20.84% - 22.21%) | (19.32% - 20.51%) | (14.15% - 15.30%) | (7.82% - 9.08%)   | (6.74% - 7.73%)   | (6.20% - 6.99%)   | (3.56% - 4.19%) | (1.89% - 2.48%) | (1.43% - 1.87%) | (1.25% - 1.61%) | (0.36% - 0.54%) |
| Punjab                     | 17.82%            | 14.89%            | 16.38%            | 13.18%            | 6.19%             | 4.86%             | 5.82%             | 3.89%           | 1.48%           | 1.04%           | 1.37%           | 0.56%           |
|                            | (17.14% - 18.47%) | (14.33% - 15.47%) | (15.91% - 16.86%) | (12.69% - 13.70%) | (5.76% - 6.63%)   | (4.53% - 5.21%)   | (5.51% - 6.14%)   | (3.61% - 4.20%) | (1.28% - 1.70%) | (0.92% - 1.18%) | (1.23% - 1.53%) | (0.46% - 0.68%) |
| Rajasthan                  | 23.61%            | 20.01%            | 19.73%            | 15.64%            | 9.46%             | 6.44%             | 6.82%             | 4.66%           | 2.46%           | 1.26%           | 1.52%           | 0.70%           |
|                            | (22.83% - 24.41%) | (19.36% - 20.70%) | (19.18% - 20.26%) | (15.06% - 16.21%) | (8.47% - 9.76%)   | (6.00% - 6.92%)   | (6.43% - 7.20%)   | (4.32% - 5.00%) | (2.15% - 2.81%) | (1.07% - 1.47%) | (1.35% - 1.70%) | (0.57% - 0.84%) |
| Sikkim                     | 14.40%            | 12.26%            | 11.97%            | 9.11%             | 4.91%             | 3.65%             | 3.23%             | 1.96%           | 1.14%           | 0.63%           | 0.33%           | 0.04%           |
|                            | (13.71% - 15.11%) | (11.66% - 12.89%) | (11.44% - 12.50%) | (8.68% - 9.57%)   | (4.49% - 5.33%)   | (3.34% - 3.99%)   | (2.95% - 3.52%)   | (1.76% - 2.18%) | (0.98% - 1.33%) | (0.52% - 0.74%) | (0.24% - 0.43%) | (0.01% - 0.10%) |
| Tamil Nadu                 | 29.68%            | 24.35%            | 23.25%            | 17.69%            | 12.42%            | 8.49%             | 8.41%             | 5.10%           | 3.90%           | 1.99%           | 2.04%           | 0.73%           |
|                            | (28.96% - 30.38%) | (23.78% - 24.94%) | (22.79% - 23.69%) | (17.16% - 18.25%) | (11.72% - 13.16%) | (8.03% - 8.96%)   | (8.02% - 8.76%)   | (4.76% - 5.46%) | (3.52% - 4.33%) | (1.77% - 2.22%) | (1.84% - 2.22%) | (0.60% - 0.87%) |
| Telangana                  | 33.27%            | 28.90%            | 25.78%            | 16.83%            | 17.67%            | 13.59%            | 11.26%            | 4.95%           | 7.67%           | 5.02%           | 3.69%           | 0.73%           |
|                            | (32.33% - 34.17%) | (28.01% - 29.84%) | (25.08% - 26.58%) | (16.27% - 17.44%) | (16.57% - 18.83%) | (12.63% - 14.66%) | (10.55% - 12.06%) | (4.59% - 5.33%) | (6.83% - 8.60%) | (4.35% - 5.78%) | (3.27% - 4.22%) | (0.60% - 0.88%) |
| Tripura                    | 26.39%            | 24.46%            | 20.92%            | 16.26%            | 10.25%            | 9.03%             | 7.26%             | 4.78%           | 2.98%           | 2.35%           | 1.63%           | 0.70%           |
|                            | (25.41% - 27.41%) | (23.61% - 25.34%) | (20.36% - 21.53%) | (15.70% - 16.81%) | (9.45% - 11.10%)  | (8.35% - 9.76%)   | (6.85% - 7.73%)   | (4.43% - 5.13%) | (2.62% - 3.38%) | (2.02% - 2.71%) | (1.44% - 1.86%) | (0.57% - 0.84%) |
| Uttar Pradesh              | 19.79%            | 16.89%            | 17.37%            | 13.88%            | 6.57%             | 5.10%             | 5.58%             | 3.72%           | 1.52%           | 1.02%           | 1.10%           | 0.47%           |
|                            | (19.17% - 20.46%) | (16.35% - 17.43%) | (16.93% - 17.83%) | (13.41% - 14.36%) | (6.15% - 6.98%)   | (4.79% - 5.41%)   | (5.30% - 5.86%)   | (3.48% - 3.96%) | (1.34% - 1.72%) | (0.90% - 1.15%) | (1.00% - 1.22%) | (0.41% - 0.54%) |
| Uttarakhand                | 25.31%            | 22.97%            | 18.73%            | 13.55%            | 10.68%            | 9.08%             | 6.95%             | 4.08%           | 3.42%           | 2.60%           | 1.77%           | 0.60%           |
|                            | (24.34% - 26.38%) | (22.09% - 23.88%) | (18.16% - 19.33%) | (13.04% - 14.13%) | (9.84% - 11.65%)  | (8.34% - 9.87%)   | (6.54% - 7.38%)   | (3.77% - 4.41%) | (2.91% - 4.02%) | (2.21% - 3.04%) | (1.56% - 2.00%) | (0.47% - 0.74%) |
| West Bengal                | 24.03%            | 22.32%            | 21.29%            | 15.53%            | 8.59%             | 7.59%             | 7.62%             | 4.33%           | 2.13%           | 1.70%           | 1.82%           | 0.53%           |
|                            | (23.16% - 24.89%) | (21.66% - 23.01%) | (20.79% - 21.82%) | (14.91% - 16.10%) | (7.89% - 9.28%)   | (7.08% - 8.12%)   | (7.23% - 8.05%)   | (3.99% - 4.69%) | (1.82% - 2.46%) | (1.47% - 1.94%) | (1.62% - 2.03%) | (0.41% - 0.66%) |
| Nepal                      | 15.81%            | 12.68%            | 10.54%            | 7.87%             | 4.00%             | 2.69%             | 1.86%             | 1.00%           | 0.43%           | 0.18%           | 0.04%           | 0.00%           |
|                            | (14.98% - 16.62%) | (12.01% - 13.34%) | (9.99% - 11.13%)  | (7.41% - 8.34%)   | (3.58% - 4.45%)   | (2.40% - 2.98%)   | (1.64% - 2.10%)   | (0.84% - 1.17%) | (0.31% - 0.54%) | (0.13% - 0.25%) | (0.02% - 0.08%) | (0.00% - 0.01%) |
| Pakistan                   | 16.95%            | 17.30%            | 16.61%            | 12.61%            | 5.48%             | 5.36%             | 5.04%             | 3.14%           | 1.08%           | 1.04%           | 1.03%           | 0.44%           |
|                            | (16.26% - 17.63%) | (16.59% - 18.02%) | (16.07% - 17.16%) | (12.05% - 13.19%) | (5.05% - 5.92%)   | (4.93% - 5.81%)   | (4.73% - 5.39%)   | (2.84% - 3.46%) | (0.90% - 1.28%) | (0.87% - 1.21%) | (0.90% - 1.18%) | (0.34% - 0.55%) |

Table S8b. Estimated overall, severe, and extreme **wasting prevalence (%)** in children under 5 years, both sexes, in 1990, 2000, 2010, and 2020.

| Location                                      | Total                       |                             |                             |                             | Severe                   |                          |                          |                          | Extreme                  |                          |                          |                          |
|-----------------------------------------------|-----------------------------|-----------------------------|-----------------------------|-----------------------------|--------------------------|--------------------------|--------------------------|--------------------------|--------------------------|--------------------------|--------------------------|--------------------------|
|                                               | 1990                        | 2000                        | 2010                        | 2020                        | 1990                     | 2000                     | 2010                     | 2020                     | 1990                     | 2000                     | 2010                     | 2020                     |
| <i>Southeast Asia, East Asia, and Oceania</i> | 8.08%<br>(7.83% - 8.34%)    | 7.12%<br>(6.98% - 7.27%)    | 6.09%<br>(5.99% - 6.20%)    | 4.30%<br>(4.22% - 4.39%)    | 1.73%<br>(1.66% - 1.80%) | 1.58%<br>(1.54% - 1.61%) | 1.29%<br>(1.26% - 1.31%) | 0.70%<br>(0.68% - 0.72%) | 0.27%<br>(0.26% - 0.29%) | 0.24%<br>(0.23% - 0.25%) | 0.18%<br>(0.17% - 0.19%) | 0.06%<br>(0.06% - 0.07%) |
| <i>East Asia</i>                              | 5.00%<br>(5.14% - 5.89%)    | 3.51%<br>(3.28% - 3.74%)    | 2.36%<br>(2.19% - 2.53%)    | 1.63%<br>(1.51% - 1.75%)    | 0.60%<br>(0.51% - 0.70%) | 0.24%<br>(0.21% - 0.28%) | 0.07%<br>(0.06% - 0.09%) | 0.02%<br>(0.01% - 0.02%) | 0.02%<br>(0.01% - 0.03%) | 0.01%<br>(0.01% - 0.02%) | 0.00%<br>(0.00% - 0.00%) | 0.00%<br>(0.00% - 0.00%) |
| China                                         | 5.36%<br>(4.99% - 5.76%)    | 3.24%<br>(3.00% - 3.49%)    | 2.27%<br>(2.10% - 2.45%)    | 1.59%<br>(1.47% - 1.72%)    | 0.54%<br>(0.45% - 0.65%) | 0.15%<br>(0.12% - 0.19%) | 0.06%<br>(0.04% - 0.08%) | 0.02%<br>(0.01% - 0.02%) | 0.01%<br>(0.00% - 0.02%) | 0.00%<br>(0.00% - 0.00%) | 0.00%<br>(0.00% - 0.00%) | 0.00%<br>(0.00% - 0.00%) |
| Democratic People's Republic of Korea         | 13.97%<br>(13.16% - 14.82%) | 12.91%<br>(12.31% - 13.50%) | 5.87%<br>(5.45% - 6.31%)    | 3.69%<br>(3.36% - 4.08%)    | 3.92%<br>(3.46% - 4.42%) | 3.55%<br>(3.20% - 3.88%) | 0.58%<br>(0.45% - 0.73%) | 0.03%<br>(0.00% - 0.09%) | 0.48%<br>(0.31% - 0.68%) | 0.38%<br>(0.24% - 0.51%) | 0.00%<br>(0.00% - 0.00%) | 0.00%<br>(0.00% - 0.00%) |
| Taiwan (Province of China)                    | 3.77%<br>(3.38% - 4.19%)    | 2.48%<br>(2.24% - 2.76%)    | 1.88%<br>(1.71% - 2.08%)    | 1.58%<br>(1.43% - 1.76%)    | 0.11%<br>(0.05% - 0.19%) | 0.01%<br>(0.00% - 0.03%) | 0.00%<br>(0.00% - 0.01%) | 0.00%<br>(0.00% - 0.00%) | 0.00%<br>(0.00% - 0.00%) | 0.00%<br>(0.00% - 0.00%) | 0.00%<br>(0.00% - 0.00%) | 0.00%<br>(0.00% - 0.00%) |
| <i>Oceania</i>                                | 9.27%<br>(8.78% - 9.76%)    | 10.77%<br>(10.26% - 11.33%) | 12.09%<br>(11.53% - 12.68%) | 10.20%<br>(9.61% - 10.78%)  | 2.08%<br>(1.86% - 2.32%) | 2.84%<br>(2.58% - 3.13%) | 3.68%<br>(3.37% - 4.02%) | 2.73%<br>(2.44% - 3.03%) | 0.12%<br>(0.08% - 0.18%) | 0.32%<br>(0.24% - 0.42%) | 0.66%<br>(0.53% - 0.80%) | 0.30%<br>(0.21% - 0.39%) |
| Fiji                                          | 8.65%<br>(7.97% - 9.40%)    | 6.41%<br>(5.92% - 6.93%)    | 5.52%<br>(5.10% - 5.98%)    | 4.62%<br>(4.22% - 5.02%)    | 1.85%<br>(1.57% - 2.18%) | 1.00%<br>(0.82% - 1.20%) | 0.71%<br>(0.57% - 0.86%) | 0.46%<br>(0.36% - 0.58%) | 0.03%<br>(0.00% - 0.08%) | 0.01%<br>(0.00% - 0.03%) | 0.00%<br>(0.00% - 0.01%) | 0.00%<br>(0.00% - 0.00%) |
| Kiribati                                      | 10.56%<br>(9.76% - 11.42%)  | 6.84%<br>(6.26% - 7.40%)    | 4.27%<br>(3.92% - 4.67%)    | 3.51%<br>(3.24% - 3.81%)    | 2.59%<br>(2.20% - 3.03%) | 1.09%<br>(0.87% - 1.30%) | 0.42%<br>(0.33% - 0.51%) | 0.30%<br>(0.23% - 0.38%) | 0.11%<br>(0.03% - 0.24%) | 0.00%<br>(0.00% - 0.01%) | 0.00%<br>(0.00% - 0.00%) | 0.00%<br>(0.00% - 0.00%) |
| Marshall Islands                              | 0.31%<br>(0.25% - 0.36%)    | 0.29%<br>(0.21% - 0.34%)    | 0.25%<br>(0.11% - 0.35%)    | 0.12%<br>(0.06% - 0.23%)    | 0.00%<br>(0.00% - 0.00%) | 0.00%<br>(0.00% - 0.00%) | 0.00%<br>(0.00% - 0.00%) | 0.00%<br>(0.00% - 0.00%) | 0.00%<br>(0.00% - 0.00%) | 0.00%<br>(0.00% - 0.00%) | 0.00%<br>(0.00% - 0.00%) | 0.00%<br>(0.00% - 0.00%) |
| Micronesia (Federated States of)              | 4.77%<br>(4.24% - 5.30%)    | 5.43%<br>(4.89% - 5.98%)    | 5.05%<br>(4.52% - 5.58%)    | 4.44%<br>(3.97% - 4.88%)    | 0.31%<br>(0.18% - 0.47%) | 0.54%<br>(0.38% - 0.73%) | 0.49%<br>(0.34% - 0.65%) | 0.37%<br>(0.26% - 0.49%) | 0.00%<br>(0.00% - 0.00%) | 0.00%<br>(0.00% - 0.00%) | 0.00%<br>(0.00% - 0.00%) | 0.00%<br>(0.00% - 0.00%) |
| Papua New Guinea                              | 10.58%<br>(9.90% - 11.26%)  | 12.83%<br>(12.12% - 13.58%) | 14.27%<br>(13.54% - 15.03%) | 11.49%<br>(10.76% - 12.19%) | 2.51%<br>(2.19% - 2.82%) | 3.64%<br>(3.28% - 4.04%) | 4.64%<br>(4.22% - 5.09%) | 3.24%<br>(2.87% - 3.62%) | 0.17%<br>(0.10% - 0.25%) | 0.44%<br>(0.33% - 0.58%) | 0.87%<br>(0.70% - 1.06%) | 0.37%<br>(0.27% - 0.49%) |
| Samoa                                         | 5.70%<br>(5.20% - 6.26%)    | 4.97%<br>(4.54% - 5.43%)    | 4.60%<br>(4.23% - 5.04%)    | 4.14%<br>(3.78% - 4.52%)    | 0.93%<br>(0.76% - 1.12%) | 0.70%<br>(0.55% - 0.86%) | 0.61%<br>(0.49% - 0.76%) | 0.51%<br>(0.40% - 0.63%) | 0.04%<br>(0.01% - 0.07%) | 0.02%<br>(0.00% - 0.04%) | 0.01%<br>(0.00% - 0.03%) | 0.01%<br>(0.00% - 0.02%) |
| Solomon Islands                               | 7.17%<br>(6.71% - 7.65%)    | 6.29%<br>(5.85% - 6.74%)    | 7.00%<br>(6.61% - 7.39%)    | 7.61%<br>(7.11% - 8.10%)    | 1.19%<br>(1.01% - 1.38%) | 0.88%<br>(0.72% - 1.04%) | 1.17%<br>(1.02% - 1.34%) | 1.52%<br>(1.31% - 1.75%) | 0.00%<br>(0.00% - 0.01%) | 0.00%<br>(0.00% - 0.00%) | 0.00%<br>(0.00% - 0.00%) | 0.00%<br>(0.00% - 0.02%) |
| Tonga                                         | 1.42%<br>(1.27% - 1.59%)    | 2.56%<br>(2.21% - 3.05%)    | 4.99%<br>(4.53% - 5.50%)    | 4.57%<br>(4.20% - 4.96%)    | 0.00%<br>(0.00% - 0.00%) | 0.01%<br>(0.00% - 0.06%) | 0.53%<br>(0.37% - 0.71%) | 0.45%<br>(0.32% - 0.60%) | 0.00%<br>(0.00% - 0.00%) | 0.00%<br>(0.00% - 0.00%) | 0.00%<br>(0.00% - 0.00%) | 0.00%<br>(0.00% - 0.00%) |
| American Samoa                                | 2.23%<br>(2.00% - 2.48%)    | 2.71%<br>(2.42% - 3.04%)    | 2.80%<br>(2.50% - 3.12%)    | 2.55%<br>(2.29% - 2.85%)    | 0.00%<br>(0.00% - 0.01%) | 0.03%<br>(0.00% - 0.06%) | 0.06%<br>(0.03% - 0.10%) | 0.05%<br>(0.02% - 0.09%) | 0.00%<br>(0.00% - 0.00%) | 0.00%<br>(0.00% - 0.00%) | 0.00%<br>(0.00% - 0.00%) | 0.00%<br>(0.00% - 0.00%) |
| Vanuatu                                       | 7.02%<br>(6.52% - 7.57%)    | 6.11%<br>(5.69% - 6.54%)    | 5.26%<br>(4.89% - 5.69%)    | 4.50%<br>(4.08% - 4.93%)    | 1.05%<br>(0.86% - 1.27%) | 0.77%<br>(0.62% - 0.92%) | 0.50%<br>(0.38% - 0.65%) | 0.29%<br>(0.18% - 0.42%) | 0.00%<br>(0.00% - 0.00%) | 0.00%<br>(0.00% - 0.00%) | 0.00%<br>(0.00% - 0.00%) | 0.00%<br>(0.00% - 0.00%) |
| Cook Islands                                  | 1.72%<br>(1.53% - 1.93%)    | 1.81%<br>(1.62% - 2.05%)    | 1.71%<br>(1.52% - 1.94%)    | 1.49%<br>(1.34% - 1.67%)    | 0.00%<br>(0.00% - 0.00%) | 0.00%<br>(0.00% - 0.00%) | 0.00%<br>(0.00% - 0.01%) | 0.00%<br>(0.00% - 0.00%) | 0.00%<br>(0.00% - 0.00%) | 0.00%<br>(0.00% - 0.00%) | 0.00%<br>(0.00% - 0.00%) | 0.00%<br>(0.00% - 0.00%) |
| Guam                                          | 1.36%<br>(1.22% - 1.52%)    | 1.53%<br>(1.37% - 1.73%)    | 1.66%<br>(1.50% - 1.89%)    | 1.58%<br>(1.42% - 1.74%)    | 0.00%<br>(0.00% - 0.00%) | 0.00%<br>(0.00% - 0.00%) | 0.00%<br>(0.00% - 0.00%) | 0.00%<br>(0.00% - 0.01%) | 0.00%<br>(0.00% - 0.00%) | 0.00%<br>(0.00% - 0.00%) | 0.00%<br>(0.00% - 0.00%) | 0.00%<br>(0.00% - 0.00%) |
| Nauru                                         | 1.56%<br>(1.41% - 1.71%)    | 1.83%<br>(1.66% - 2.00%)    | 1.60%<br>(1.47% - 1.76%)    | 1.21%<br>(1.09% - 1.34%)    | 0.00%<br>(0.00% - 0.01%) | 0.01%<br>(0.00% - 0.03%) | 0.01%<br>(0.00% - 0.03%) | 0.01%<br>(0.00% - 0.02%) | 0.00%<br>(0.00% - 0.00%) | 0.00%<br>(0.00% - 0.00%) | 0.00%<br>(0.00% - 0.00%) | 0.00%<br>(0.00% - 0.00%) |
| Niue                                          | 2.16%<br>(1.92% - 2.43%)    | 2.56%<br>(2.30% - 2.88%)    | 2.48%<br>(2.22% - 2.79%)    | 2.24%<br>(2.00% - 2.48%)    | 0.00%<br>(0.00% - 0.01%) | 0.02%<br>(0.00% - 0.05%) | 0.03%<br>(0.01% - 0.06%) | 0.02%<br>(0.00% - 0.05%) | 0.00%<br>(0.00% - 0.00%) | 0.00%<br>(0.00% - 0.00%) | 0.00%<br>(0.00% - 0.00%) | 0.00%<br>(0.00% - 0.00%) |
| Northern Mariana Islands                      | 1.38%<br>(1.22% - 1.56%)    | 1.64%<br>(1.48% - 1.80%)    | 1.78%<br>(1.59% - 1.98%)    | 1.67%<br>(1.51% - 1.87%)    | 0.00%<br>(0.00% - 0.00%) | 0.00%<br>(0.00% - 0.00%) | 0.00%<br>(0.00% - 0.01%) | 0.00%<br>(0.00% - 0.01%) | 0.00%<br>(0.00% - 0.00%) | 0.00%<br>(0.00% - 0.00%) | 0.00%<br>(0.00% - 0.00%) | 0.00%<br>(0.00% - 0.00%) |
| Palau                                         | 1.95%<br>(1.74% - 2.17%)    | 2.25%<br>(2.00% - 2.52%)    | 2.62%<br>(2.35% - 2.92%)    | 2.19%<br>(1.95% - 2.46%)    | 0.00%<br>(0.00% - 0.00%) | 0.01%<br>(0.00% - 0.02%) | 0.04%<br>(0.01% - 0.08%) | 0.02%<br>(0.00% - 0.05%) | 0.00%<br>(0.00% - 0.00%) | 0.00%<br>(0.00% - 0.00%) | 0.00%<br>(0.00% - 0.00%) | 0.00%<br>(0.00% - 0.00%) |
| Tokelau                                       | 3.48%<br>(3.13% - 3.87%)    | 3.84%<br>(3.46% - 4.25%)    | 3.35%<br>(3.01% - 3.79%)    | 2.57%<br>(2.28% - 2.87%)    | 0.07%<br>(0.03% - 0.14%) | 0.17%<br>(0.10% - 0.26%) | 0.13%<br>(0.07% - 0.19%) | 0.05%<br>(0.02% - 0.09%) | 0.00%<br>(0.00% - 0.00%) | 0.00%<br>(0.00% - 0.00%) | 0.00%<br>(0.00% - 0.00%) | 0.00%<br>(0.00% - 0.00%) |

Table S8b. Estimated overall, severe, and extreme **wasting** prevalence (%) in children under 5 years, both sexes, in 1990, 2000, 2010, and 2020.

| Location                       | Total                       |                             |                             |                             | Severe                      |                            |                          |                          | Extreme                  |                          |                          |                          |
|--------------------------------|-----------------------------|-----------------------------|-----------------------------|-----------------------------|-----------------------------|----------------------------|--------------------------|--------------------------|--------------------------|--------------------------|--------------------------|--------------------------|
|                                | 1990                        | 2000                        | 2010                        | 2020                        | 1990                        | 2000                       | 2010                     | 2020                     | 1990                     | 2000                     | 2010                     | 2020                     |
| Tuvalu                         | 5.41%<br>(4.93% - 5.97%)    | 3.99%<br>(3.51% - 4.43%)    | 3.28%<br>(2.90% - 3.73%)    | 2.76%<br>(2.45% - 3.11%)    | 0.50%<br>(0.35% - 0.69%)    | 0.13%<br>(0.04% - 0.25%)   | 0.04%<br>(0.00% - 0.12%) | 0.01%<br>(0.00% - 0.05%) | 0.00%<br>(0.00% - 0.00%) | 0.00%<br>(0.00% - 0.00%) | 0.00%<br>(0.00% - 0.00%) | 0.00%<br>(0.00% - 0.00%) |
| <b>Southeast Asia</b>          | 13.53%<br>(13.36% - 13.69%) | 12.00%<br>(11.86% - 12.13%) | 8.02%<br>(10.12% - 10.36%)  | 8.02%<br>(7.90% - 8.14%)    | 4.12%<br>(4.03% - 4.21%)    | 3.38%<br>(3.31% - 3.44%)   | 2.62%<br>(2.56% - 2.67%) | 1.65%<br>(1.60% - 1.70%) | 0.82%<br>(0.79% - 0.86%) | 0.56%<br>(0.54% - 0.58%) | 0.37%<br>(0.36% - 0.39%) | 0.15%<br>(0.14% - 0.16%) |
| Cambodia                       | 18.71%<br>(17.85% - 19.59%) | 16.99%<br>(16.32% - 17.69%) | 11.21%<br>(10.71% - 11.72%) | 8.08%<br>(7.59% - 8.62%)    | 5.93%<br>(5.37% - 6.52%)    | 5.00%<br>(4.57% - 5.42%)   | 2.28%<br>(2.05% - 2.51%) | 1.14%<br>(0.97% - 1.34%) | 1.13%<br>(0.90% - 1.38%) | 0.76%<br>(0.60% - 0.92%) | 0.06%<br>(0.04% - 0.09%) | 0.00%<br>(0.00% - 0.01%) |
| Indonesia                      | 17.19%<br>(16.97% - 17.42%) | 14.64%<br>(14.45% - 14.82%) | 12.69%<br>(12.52% - 12.85%) | 10.07%<br>(9.92% - 10.22%)  | 6.34%<br>(6.20% - 6.49%)    | 4.97%<br>(4.86% - 5.08%)   | 4.03%<br>(3.94% - 4.12%) | 2.66%<br>(2.60% - 2.74%) | 1.80%<br>(1.73% - 1.87%) | 1.20%<br>(1.16% - 1.25%) | 0.83%<br>(0.80% - 0.86%) | 0.36%<br>(0.34% - 0.38%) |
| <i>Aceh</i>                    | 20.63%<br>(19.63% - 21.71%) | 18.28%<br>(17.43% - 19.11%) | 16.14%<br>(15.48% - 16.79%) | 13.86%<br>(13.16% - 14.62%) | 8.95%<br>(8.15% - 9.81%)    | 7.31%<br>(6.69% - 7.93%)   | 5.89%<br>(5.45% - 6.35%) | 4.45%<br>(4.04% - 4.92%) | 3.00%<br>(2.56% - 3.50%) | 2.14%<br>(1.83% - 2.48%) | 1.44%<br>(1.23% - 1.67%) | 0.79%<br>(0.62% - 1.00%) |
| <i>North Sumatra</i>           | 15.50%<br>(14.73% - 16.26%) | 14.78%<br>(14.05% - 15.48%) | 13.82%<br>(13.16% - 14.52%) | 10.85%<br>(10.30% - 11.44%) | 5.55%<br>(5.06% - 6.03%)    | 5.23%<br>(4.82% - 5.65%)   | 4.65%<br>(4.28% - 5.06%) | 3.04%<br>(2.74% - 3.35%) | 1.67%<br>(1.43% - 1.93%) | 1.45%<br>(1.24% - 1.66%) | 1.05%<br>(0.90% - 1.21%) | 0.53%<br>(0.42% - 0.65%) |
| <i>West Sumatra</i>            | 14.08%<br>(13.35% - 14.90%) | 13.72%<br>(13.01% - 14.48%) | 11.41%<br>(10.83% - 12.04%) | 8.64%<br>(8.13% - 9.17%)    | 5.07%<br>(4.64% - 5.59%)    | 4.60%<br>(4.16% - 5.08%)   | 3.22%<br>(2.90% - 3.54%) | 1.90%<br>(1.69% - 2.15%) | 1.50%<br>(1.28% - 1.77%) | 1.16%<br>(0.97% - 1.38%) | 0.58%<br>(0.47% - 0.70%) | 0.23%<br>(0.16% - 0.32%) |
| <i>Riau</i>                    | 24.79%<br>(23.58% - 26.01%) | 21.85%<br>(20.84% - 22.88%) | 18.99%<br>(18.23% - 19.84%) | 15.58%<br>(14.76% - 16.48%) | 12.53%<br>(11.46% - 13.67%) | 10.18%<br>(9.32% - 11.07%) | 8.05%<br>(7.51% - 8.68%) | 5.59%<br>(5.07% - 6.17%) | 5.19%<br>(4.51% - 5.94%) | 3.75%<br>(3.24% - 4.30%) | 2.55%<br>(2.26% - 2.90%) | 1.31%<br>(1.07% - 1.58%) |
| <i>Jambi</i>                   | 24.88%<br>(23.74% - 26.07%) | 21.40%<br>(20.54% - 22.31%) | 18.26%<br>(17.62% - 18.92%) | 14.51%<br>(13.80% - 15.34%) | 12.43%<br>(11.42% - 13.51%) | 9.66%<br>(8.96% - 10.41%)  | 7.36%<br>(6.86% - 7.86%) | 5.02%<br>(4.58% - 5.55%) | 5.12%<br>(4.48% - 5.82%) | 3.42%<br>(3.02% - 3.88%) | 2.15%<br>(1.89% - 2.41%) | 1.06%<br>(0.87% - 1.30%) |
| <i>South Sumatra</i>           | 20.36%<br>(19.39% - 21.40%) | 17.73%<br>(16.94% - 18.52%) | 14.61%<br>(14.11% - 15.18%) | 10.75%<br>(10.21% - 11.35%) | 7.92%<br>(7.18% - 8.71%)    | 6.54%<br>(5.99% - 7.10%)   | 5.03%<br>(4.71% - 5.39%) | 2.88%<br>(2.61% - 3.18%) | 2.34%<br>(1.96% - 2.76%) | 1.70%<br>(1.44% - 1.98%) | 1.07%<br>(0.93% - 1.23%) | 0.26%<br>(0.19% - 0.35%) |
| <i>Bengkulu</i>                | 23.24%<br>(22.23% - 24.31%) | 19.84%<br>(18.90% - 20.83%) | 16.81%<br>(16.09% - 17.57%) | 13.51%<br>(12.77% - 14.25%) | 11.53%<br>(10.64% - 12.47%) | 8.93%<br>(8.18% - 9.71%)   | 6.82%<br>(6.32% - 7.38%) | 4.78%<br>(4.33% - 5.24%) | 4.66%<br>(4.09% - 5.28%) | 3.11%<br>(2.68% - 3.57%) | 2.00%<br>(1.74% - 2.28%) | 1.04%<br>(0.84% - 1.25%) |
| <i>Lampung</i>                 | 19.70%<br>(18.80% - 20.61%) | 16.36%<br>(15.63% - 17.20%) | 14.24%<br>(13.55% - 14.89%) | 11.20%<br>(10.58% - 11.92%) | 7.16%<br>(6.52% - 7.84%)    | 5.63%<br>(5.15% - 6.17%)   | 4.87%<br>(4.47% - 5.28%) | 3.07%<br>(2.76% - 3.43%) | 1.88%<br>(1.57% - 2.22%) | 1.27%<br>(1.06% - 1.51%) | 1.01%<br>(0.84% - 1.20%) | 0.35%<br>(0.27% - 0.45%) |
| <i>Bangka-Belitung Islands</i> | 12.85%<br>(12.16% - 13.59%) | 8.32%<br>(10.24% - 11.47%)  | 6.77%<br>(7.88% - 8.82%)    | 6.77%<br>(6.36% - 7.21%)    | 3.93%<br>(3.56% - 4.33%)    | 2.98%<br>(2.69% - 3.26%)   | 1.86%<br>(1.67% - 2.06%) | 1.28%<br>(1.12% - 1.45%) | 0.69%<br>(0.56% - 0.82%) | 0.43%<br>(0.34% - 0.51%) | 0.20%<br>(0.16% - 0.24%) | 0.10%<br>(0.06% - 0.13%) |
| <i>Riau Islands</i>            | 11.02%<br>(10.40% - 11.66%) | 8.57%<br>(8.06% - 9.08%)    | 7.39%<br>(6.99% - 7.83%)    | 6.19%<br>(5.81% - 6.58%)    | 2.88%<br>(2.59% - 3.18%)    | 1.84%<br>(1.63% - 2.06%)   | 1.42%<br>(1.24% - 1.59%) | 0.99%<br>(0.85% - 1.13%) | 0.40%<br>(0.32% - 0.49%) | 0.19%<br>(0.14% - 0.25%) | 0.13%<br>(0.10% - 0.18%) | 0.07%<br>(0.04% - 0.11%) |
| <i>North Kalimantan</i>        | 23.32%<br>(22.27% - 24.41%) | 19.21%<br>(18.28% - 20.12%) | 15.95%<br>(15.26% - 16.67%) | 12.94%<br>(12.25% - 13.63%) | 10.62%<br>(9.73% - 11.56%)  | 7.56%<br>(6.91% - 8.22%)   | 5.53%<br>(5.08% - 5.98%) | 3.87%<br>(3.48% - 4.26%) | 3.84%<br>(3.31% - 4.40%) | 2.15%<br>(1.81% - 2.50%) | 1.20%<br>(1.00% - 1.41%) | 0.53%<br>(0.39% - 0.69%) |
| <i>Jakarta</i>                 | 19.20%<br>(18.29% - 20.18%) | 14.82%<br>(14.12% - 15.60%) | 11.96%<br>(11.35% - 12.56%) | 9.22%<br>(8.68% - 9.76%)    | 6.95%<br>(6.31% - 7.62%)    | 4.90%<br>(4.48% - 5.39%)   | 3.65%<br>(3.34% - 3.98%) | 2.32%<br>(2.07% - 2.59%) | 1.79%<br>(1.48% - 2.13%) | 1.10%<br>(0.93% - 1.30%) | 0.70%<br>(0.60% - 0.82%) | 0.30%<br>(0.23% - 0.39%) |
| <i>West Java</i>               | 13.54%<br>(12.79% - 14.32%) | 11.15%<br>(10.51% - 11.79%) | 8.80%<br>(8.33% - 9.28%)    | 6.67%<br>(6.28% - 7.07%)    | 3.73%<br>(3.32% - 4.16%)    | 2.88%<br>(2.56% - 3.19%)   | 2.09%<br>(1.88% - 2.30%) | 1.21%<br>(1.06% - 1.36%) | 0.58%<br>(0.47% - 0.72%) | 0.41%<br>(0.31% - 0.50%) | 0.27%<br>(0.21% - 0.34%) | 0.07%<br>(0.04% - 0.11%) |
| <i>Central Java</i>            | 12.52%<br>(11.86% - 13.25%) | 11.27%<br>(10.63% - 11.90%) | 11.15%<br>(10.59% - 11.76%) | 9.34%<br>(8.75% - 9.92%)    | 3.64%<br>(3.28% - 4.06%)    | 3.09%<br>(2.77% - 3.40%)   | 3.24%<br>(2.95% - 3.55%) | 2.30%<br>(2.04% - 2.56%) | 0.75%<br>(0.61% - 0.91%) | 0.51%<br>(0.41% - 0.61%) | 0.50%<br>(0.41% - 0.61%) | 0.18%<br>(0.13% - 0.23%) |
| <i>Yogyakarta</i>              | 15.09%<br>(14.24% - 15.94%) | 11.42%<br>(10.74% - 12.12%) | 8.24%<br>(7.79% - 8.72%)    | 7.12%<br>(6.67% - 7.56%)    | 5.13%<br>(4.59% - 5.68%)    | 3.18%<br>(2.84% - 3.56%)   | 1.78%<br>(1.59% - 1.99%) | 1.34%<br>(1.17% - 1.51%) | 1.11%<br>(0.87% - 1.39%) | 0.38%<br>(0.26% - 0.52%) | 0.10%<br>(0.07% - 0.13%) | 0.06%<br>(0.03% - 0.09%) |
| <i>East Java</i>               | 17.61%<br>(16.62% - 18.59%) | 13.47%<br>(12.74% - 14.21%) | 10.99%<br>(10.38% - 11.60%) | 8.57%<br>(8.07% - 9.12%)    | 6.18%<br>(5.53% - 6.85%)    | 4.02%<br>(3.62% - 4.42%)   | 3.19%<br>(2.90% - 3.50%) | 1.99%<br>(1.78% - 2.23%) | 1.47%<br>(1.20% - 1.78%) | 0.64%<br>(0.50% - 0.78%) | 0.51%<br>(0.43% - 0.59%) | 0.20%<br>(0.15% - 0.26%) |
| <i>Banten</i>                  | 22.49%<br>(21.45% - 23.65%) | 18.74%<br>(17.81% - 19.68%) | 16.34%<br>(15.71% - 17.08%) | 13.27%<br>(12.53% - 14.06%) | 10.67%<br>(9.76% - 11.66%)  | 7.86%<br>(7.16% - 8.64%)   | 6.25%<br>(5.81% - 6.80%) | 4.44%<br>(3.97% - 4.92%) | 4.03%<br>(3.47% - 4.65%) | 2.45%<br>(2.06% - 2.89%) | 1.64%<br>(1.42% - 1.93%) | 0.84%<br>(0.64% - 1.06%) |
| <i>Bali</i>                    | 14.10%<br>(13.18% - 15.01%) | 10.06%<br>(9.48% - 10.68%)  | 8.40%<br>(7.61% - 9.05%)    | 5.78%<br>(5.43% - 6.17%)    | 5.00%<br>(4.52% - 5.56%)    | 2.97%<br>(2.68% - 3.29%)   | 2.05%<br>(1.84% - 2.28%) | 1.11%<br>(0.98% - 1.24%) | 1.46%<br>(1.24% - 1.72%) | 0.70%<br>(0.59% - 0.82%) | 0.38%<br>(0.31% - 0.47%) | 0.08%<br>(0.04% - 0.12%) |
| <i>West Nusa Tenggara</i>      | 23.05%<br>(22.02% - 24.11%) | 19.74%<br>(18.81% - 20.67%) | 14.69%<br>(13.95% - 15.49%) | 11.05%<br>(10.39% - 11.75%) | 9.85%<br>(9.03% - 10.74%)   | 7.66%<br>(7.05% - 8.36%)   | 4.69%<br>(4.26% - 5.16%) | 2.74%<br>(2.43% - 3.07%) | 3.33%<br>(2.90% - 3.84%) | 2.21%<br>(1.89% - 2.56%) | 0.86%<br>(0.70% - 1.05%) | 0.25%<br>(0.19% - 0.31%) |

Table S8b. Estimated overall, severe, and extreme **wasting** prevalence (%) in children under 5 years, both sexes, in 1990, 2000, 2010, and 2020.

| Location                         | Total             |                   |                   |                   | Severe            |                  |                 |                 | Extreme         |                 |                 |                 |
|----------------------------------|-------------------|-------------------|-------------------|-------------------|-------------------|------------------|-----------------|-----------------|-----------------|-----------------|-----------------|-----------------|
|                                  | 1990              | 2000              | 2010              | 2020              | 1990              | 2000             | 2010            | 2020            | 1990            | 2000            | 2010            | 2020            |
| <i>East Nusa Tenggara</i>        | 23.86%            | 21.27%            | 18.29%            | 14.10%            | 10.10%            | 8.15%            | 6.16%           | 3.84%           | 3.25%           | 2.22%           | 1.28%           | 0.42%           |
|                                  | (22.73% - 25.01%) | (20.25% - 22.29%) | (17.42% - 19.23%) | (13.23% - 15.05%) | (9.16% - 11.09%)  | (7.39% - 8.94%)  | (5.58% - 6.79%) | (3.37% - 4.39%) | (2.72% - 3.78%) | (1.85% - 2.62%) | (1.05% - 1.56%) | (0.27% - 0.62%) |
| <i>West Kalimantan</i>           | 26.11%            | 22.65%            | 20.10%            | 15.97%            | 13.26%            | 10.40%           | 8.46%           | 5.69%           | 5.49%           | 3.73%           | 2.64%           | 1.30%           |
|                                  | (24.91% - 27.30%) | (21.62% - 23.75%) | (19.26% - 20.94%) | (15.14% - 16.84%) | (12.13% - 14.48%) | (9.53% - 11.37%) | (7.78% - 9.16%) | (5.15% - 6.27%) | (4.72% - 6.34%) | (3.23% - 4.33%) | (2.27% - 3.05%) | (1.05% - 1.58%) |
| <i>Central Kalimantan</i>        | 21.05%            | 18.01%            | 15.47%            | 12.22%            | 9.09%             | 7.00%            | 5.38%           | 3.62%           | 3.01%           | 1.93%           | 1.17%           | 0.46%           |
|                                  | (20.01% - 22.08%) | (17.19% - 18.79%) | (14.97% - 15.98%) | (11.52% - 12.89%) | (8.30% - 9.93%)   | (6.44% - 7.54%)  | (5.07% - 5.73%) | (3.24% - 4.00%) | (2.57% - 3.50%) | (1.65% - 2.21%) | (1.03% - 1.33%) | (0.32% - 0.61%) |
| <i>South Kalimantan</i>          | 16.93%            | 14.55%            | 12.43%            | 8.36%             | 4.77%             | 3.48%            | 2.70%           | 1.18%           | 0.68%           | 0.34%           | 0.26%           | 0.03%           |
|                                  | (15.93% - 17.85%) | (13.76% - 15.44%) | (11.71% - 13.14%) | (7.78% - 8.88%)   | (4.21% - 5.33%)   | (3.08% - 3.95%)  | (2.39% - 3.04%) | (0.98% - 1.37%) | (0.51% - 0.88%) | (0.25% - 0.45%) | (0.19% - 0.35%) | (0.01% - 0.06%) |
| <i>East Kalimantan</i>           | 19.75%            | 17.35%            | 14.14%            | 11.33%            | 8.48%             | 6.87%            | 4.89%           | 3.37%           | 2.78%           | 1.95%           | 1.03%           | 0.42%           |
|                                  | (18.77% - 20.75%) | (16.51% - 18.18%) | (13.48% - 14.86%) | (10.63% - 12.00%) | (7.75% - 9.26%)   | (6.30% - 7.46%)  | (4.48% - 5.35%) | (2.99% - 3.75%) | (2.38% - 3.21%) | (1.66% - 2.26%) | (0.85% - 1.23%) | (0.30% - 0.56%) |
| <i>North Sulawesi</i>            | 14.80%            | 11.75%            | 9.84%             | 7.75%             | 4.76%             | 3.23%            | 2.38%           | 1.57%           | 0.90%           | 0.34%           | 0.14%           | 0.03%           |
|                                  | (13.97% - 15.55%) | (11.12% - 12.44%) | (9.26% - 10.38%)  | (7.27% - 8.23%)   | (4.30% - 5.22%)   | (2.91% - 3.58%)  | (2.13% - 2.63%) | (1.37% - 1.77%) | (0.71% - 1.09%) | (0.25% - 0.44%) | (0.10% - 0.18%) | (0.01% - 0.06%) |
| <i>Central Sulawesi</i>          | 22.02%            | 19.06%            | 15.67%            | 11.55%            | 9.18%             | 7.12%            | 5.06%           | 2.98%           | 2.84%           | 1.82%           | 0.93%           | 0.20%           |
|                                  | (20.96% - 23.12%) | (18.07% - 20.07%) | (14.89% - 16.42%) | (10.86% - 12.30%) | (8.35% - 10.07%)  | (6.46% - 7.82%)  | (4.59% - 5.56%) | (2.62% - 3.37%) | (2.40% - 3.33%) | (1.51% - 2.17%) | (0.74% - 1.14%) | (0.11% - 0.31%) |
| <i>South Sulawesi</i>            | 15.85%            | 11.99%            | 11.96%            | 9.85%             | 5.28%             | 3.46%            | 3.19%           | 2.17%           | 1.32%           | 0.79%           | 0.48%           | 0.15%           |
|                                  | (15.06% - 16.71%) | (11.36% - 12.65%) | (11.29% - 12.64%) | (9.25% - 10.51%)  | (4.81% - 5.83%)   | (3.15% - 3.81%)  | (2.86% - 3.54%) | (1.91% - 2.46%) | (1.11% - 1.56%) | (0.67% - 0.95%) | (0.38% - 0.58%) | (0.10% - 0.22%) |
| <i>Southeast Sulawesi</i>        | 21.82%            | 19.47%            | 16.43%            | 12.67%            | 9.61%             | 7.92%            | 5.96%           | 3.82%           | 3.26%           | 2.36%           | 1.42%           | 0.53%           |
|                                  | (20.72% - 23.01%) | (18.58% - 20.37%) | (15.72% - 17.18%) | (11.94% - 13.39%) | (8.74% - 10.55%)  | (7.26% - 8.59%)  | (5.50% - 6.44%) | (3.43% - 4.25%) | (2.80% - 3.80%) | (2.02% - 2.71%) | (1.21% - 1.64%) | (0.39% - 0.70%) |
| <i>Gorontalo</i>                 | 20.57%            | 18.68%            | 16.17%            | 12.04%            | 8.08%             | 6.80%            | 5.33%           | 3.14%           | 2.30%           | 1.68%           | 1.05%           | 0.27%           |
|                                  | (19.57% - 21.58%) | (17.84% - 19.56%) | (15.32% - 17.05%) | (11.34% - 12.83%) | (7.36% - 8.85%)   | (6.23% - 7.41%)  | (4.80% - 5.89%) | (2.78% - 3.56%) | (1.94% - 2.69%) | (1.40% - 1.97%) | (0.82% - 1.29%) | (0.18% - 0.39%) |
| <i>West Sulawesi</i>             | 20.61%            | 18.40%            | 15.43%            | 11.24%            | 8.76%             | 7.24%            | 5.32%           | 3.04%           | 2.85%           | 2.07%           | 1.15%           | 0.26%           |
|                                  | (19.62% - 21.55%) | (17.60% - 19.19%) | (14.99% - 15.88%) | (10.62% - 11.88%) | (8.03% - 9.50%)   | (6.71% - 7.80%)  | (5.03% - 5.61%) | (2.72% - 3.37%) | (2.45% - 3.28%) | (1.81% - 2.35%) | (1.02% - 1.28%) | (0.18% - 0.36%) |
| <i>Maluku</i>                    | 19.71%            | 17.94%            | 18.12%            | 14.83%            | 7.59%             | 6.41%            | 6.41%           | 4.46%           | 2.06%           | 1.50%           | 1.46%           | 0.67%           |
|                                  | (18.66% - 20.66%) | (17.20% - 18.70%) | (17.60% - 18.72%) | (14.12% - 15.57%) | (6.86% - 8.32%)   | (5.90% - 6.97%)  | (6.02% - 6.86%) | (4.04% - 4.91%) | (1.71% - 2.45%) | (1.27% - 1.77%) | (1.28% - 1.67%) | (0.50% - 0.84%) |
| <i>North Maluku</i>              | 20.42%            | 17.83%            | 16.36%            | 13.05%            | 8.20%             | 6.48%            | 5.49%           | 3.65%           | 2.40%           | 1.57%           | 1.11%           | 0.40%           |
|                                  | (19.48% - 21.41%) | (17.05% - 18.59%) | (15.87% - 16.91%) | (12.35% - 13.75%) | (7.49% - 8.95%)   | (5.95% - 7.02%)  | (5.16% - 5.85%) | (3.29% - 4.05%) | (2.05% - 2.80%) | (1.33% - 1.83%) | (0.97% - 1.27%) | (0.27% - 0.55%) |
| <i>West Papua</i>                | 16.38%            | 14.89%            | 14.36%            | 10.73%            | 5.47%             | 4.73%            | 4.59%           | 2.76%           | 1.16%           | 0.87%           | 0.83%           | 0.26%           |
|                                  | (15.51% - 17.30%) | (14.07% - 15.73%) | (13.57% - 15.17%) | (10.09% - 11.44%) | (4.95% - 6.03%)   | (4.25% - 5.24%)  | (4.13% - 5.06%) | (2.46% - 3.11%) | (0.93% - 1.41%) | (0.68% - 1.09%) | (0.64% - 1.03%) | (0.19% - 0.35%) |
| <i>Papua</i>                     | 19.27%            | 16.82%            | 16.57%            | 14.07%            | 7.62%             | 6.03%            | 5.95%           | 4.56%           | 2.16%           | 1.40%           | 1.38%           | 0.82%           |
|                                  | (18.28% - 20.20%) | (16.02% - 17.65%) | (16.03% - 17.15%) | (13.37% - 14.76%) | (6.91% - 8.32%)   | (5.51% - 6.60%)  | (5.58% - 6.33%) | (4.15% - 4.97%) | (1.81% - 2.52%) | (1.16% - 1.67%) | (1.22% - 1.56%) | (0.65% - 0.99%) |
| Lao People's Democratic Republic | 13.20%            | 12.77%            | 8.37%             | 6.60%             | 3.68%             | 3.20%            | 1.31%           | 0.76%           | 0.40%           | 0.22%           | 0.00%           | 0.00%           |
|                                  | (12.55% - 13.87%) | (12.30% - 13.31%) | (7.99% - 8.82%)   | (6.21% - 7.02%)   | (3.32% - 4.07%)   | (2.94% - 3.47%)  | (1.16% - 1.48%) | (0.62% - 0.90%) | (0.27% - 0.54%) | (0.15% - 0.31%) | (0.00% - 0.01%) | (0.00% - 0.00%) |
| Malaysia                         | 12.14%            | 11.97%            | 9.75%             | 8.36%             | 3.63%             | 3.61%            | 2.41%           | 1.79%           | 0.50%           | 0.51%           | 0.10%           | 0.03%           |
|                                  | (11.45% - 12.76%) | (11.34% - 12.66%) | (9.16% - 10.38%)  | (7.83% - 8.94%)   | (3.26% - 3.99%)   | (3.27% - 4.03%)  | (2.14% - 2.73%) | (1.57% - 2.05%) | (0.36% - 0.65%) | (0.37% - 0.68%) | (0.05% - 0.18%) | (0.01% - 0.06%) |
| Maldives                         | 18.02%            | 13.87%            | 9.08%             | 7.72%             | 5.76%             | 3.72%            | 1.59%           | 1.08%           | 1.08%           | 0.38%           | 0.00%           | 0.00%           |
|                                  | (17.02% - 19.03%) | (13.00% - 14.68%) | (8.42% - 9.72%)   | (7.09% - 8.41%)   | (5.06% - 6.45%)   | (3.24% - 4.21%)  | (1.32% - 1.88%) | (0.83% - 1.35%) | (0.78% - 1.39%) | (0.22% - 0.56%) | (0.00% - 0.01%) | (0.00% - 0.00%) |
| Myanmar                          | 14.06%            | 11.71%            | 8.47%             | 5.73%             | 3.25%             | 2.32%            | 1.21%           | 0.43%           | 0.18%           | 0.03%           | 0.00%           | 0.00%           |
|                                  | (13.17% - 15.01%) | (11.21% - 12.25%) | (8.07% - 8.90%)   | (5.26% - 6.18%)   | (2.84% - 3.74%)   | (2.08% - 2.57%)  | (1.06% - 1.38%) | (0.31% - 0.56%) | (0.09% - 0.30%) | (0.01% - 0.06%) | (0.00% - 0.00%) | (0.00% - 0.00%) |
| Philippines                      | 8.55%             | 8.23%             | 8.35%             | 6.81%             | 1.84%             | 1.69%            | 1.76%           | 1.18%           | 0.05%           | 0.05%           | 0.10%           | 0.03%           |
|                                  | (8.20% - 8.93%)   | (7.85% - 8.60%)   | (8.00% - 8.72%)   | (6.44% - 7.18%)   | (1.68% - 2.01%)   | (1.53% - 1.85%)  | (1.62% - 1.91%) | (1.04% - 1.33%) | (0.03% - 0.08%) | (0.03% - 0.07%) | (0.08% - 0.13%) | (0.02% - 0.05%) |
| <i>Mountain Province</i>         | 9.03%             | 8.30%             | 7.93%             | 6.24%             | 2.35%             | 2.02%            | 1.89%           | 1.20%           | 0.11%           | 0.08%           | 0.13%           | 0.03%           |
|                                  | (8.36% - 9.76%)   | (7.68% - 8.95%)   | (7.36% - 8.51%)   | (5.72% - 6.78%)   | (2.02% - 2.73%)   | (1.74% - 2.32%)  | (1.65% - 2.16%) | (0.99% - 1.42%) | (0.04% - 0.22%) | (0.03% - 0.14%) | (0.07% - 0.21%) | (0.00% - 0.07%) |
| <i>Ifugao</i>                    | 8.80%             | 7.63%             | 7.56%             | 6.04%             | 2.23%             | 1.72%            | 1.72%           | 1.12%           | 0.08%           | 0.04%           | 0.10%           | 0.02%           |
|                                  | (8.15% - 9.47%)   | (7.03% - 8.24%)   | (6.98% - 8.10%)   | (5.59% - 6.58%)   | (1.92% - 2.58%)   | (1.47% - 2.00%)  | (1.45% - 1.97%) | (0.93% - 1.34%) | (0.02% - 0.18%) | (0.01% - 0.09%) | (0.05% - 0.16%) | (0.00% - 0.05%) |
| <i>Benguet</i>                   | 7.00%             | 6.46%             | 6.60%             | 5.53%             | 1.43%             | 1.22%            | 1.29%           | 0.90%           | 0.00%           | 0.00%           | 0.04%           | 0.01%           |
|                                  | (6.42% - 7.58%)   | (5.92% - 6.99%)   | (6.08% - 7.15%)   | (5.08% - 6.04%)   | (1.19% - 1.70%)   | (1.00% - 1.44%)  | (1.09% - 1.53%) | (0.72% - 1.11%) | (0.00% - 0.02%) | (0.00% - 0.02%) | (0.01% - 0.08%) | (0.00% - 0.03%) |

Table S8b. Estimated overall, severe, and extreme **wasting** prevalence (%) in children under 5 years, both sexes, in 1990, 2000, 2010, and 2020.

| Location      | Total            |                  |                  |                 | Severe          |                 |                 |                 | Extreme         |                 |                 |                 |
|---------------|------------------|------------------|------------------|-----------------|-----------------|-----------------|-----------------|-----------------|-----------------|-----------------|-----------------|-----------------|
|               | 1990             | 2000             | 2010             | 2020            | 1990            | 2000            | 2010            | 2020            | 1990            | 2000            | 2010            | 2020            |
| Abra          | 7.07%            | 6.92%            | 6.85%            | 5.64%           | 1.47%           | 1.41%           | 1.40%           | 0.94%           | 0.00%           | 0.01%           | 0.05%           | 0.01%           |
|               | (6.50% - 7.66%)  | (6.39% - 7.51%)  | (6.31% - 7.42%)  | (5.19% - 6.16%) | (1.24% - 1.73%) | (1.18% - 1.66%) | (1.18% - 1.64%) | (0.77% - 1.15%) | (0.00% - 0.03%) | (0.00% - 0.04%) | (0.02% - 0.09%) | (0.00% - 0.03%) |
| Apayao        | 10.07%           | 9.34%            | 8.44%            | 5.66%           | 2.93%           | 2.56%           | 2.18%           | 1.38%           | 0.30%           | 0.22%           | 0.21%           | 0.06%           |
|               | (9.32% - 10.88%) | (8.63% - 10.11%) | (7.82% - 9.07%)  | (5.97% - 7.13%) | (2.53% - 3.38%) | (2.21% - 2.95%) | (1.89% - 2.49%) | (1.14% - 1.62%) | (0.18% - 0.48%) | (0.13% - 0.33%) | (0.14% - 0.30%) | (0.02% - 0.11%) |
| Kalinga       | 10.24%           | 8.92%            | 8.54%            | 6.97%           | 2.98%           | 2.34%           | 2.20%           | 1.52%           | 0.31%           | 0.15%           | 0.21%           | 0.07%           |
|               | (9.49% - 11.02%) | (8.27% - 9.58%)  | (7.93% - 9.18%)  | (6.38% - 7.57%) | (2.59% - 3.40%) | (2.03% - 2.67%) | (1.90% - 2.52%) | (1.26% - 1.79%) | (0.17% - 0.48%) | (0.08% - 0.24%) | (0.13% - 0.30%) | (0.03% - 0.13%) |
| La Union      | 7.60%            | 7.21%            | 7.52%            | 6.21%           | 1.43%           | 1.27%           | 1.39%           | 0.94%           | 0.00%           | 0.00%           | 0.04%           | 0.01%           |
|               | (6.99% - 8.27%)  | (6.61% - 7.82%)  | (6.99% - 8.11%)  | (5.66% - 6.77%) | (1.17% - 1.71%) | (1.04% - 1.52%) | (1.19% - 1.66%) | (0.74% - 1.14%) | (0.00% - 0.02%) | (0.00% - 0.02%) | (0.01% - 0.08%) | (0.00% - 0.03%) |
| Ilocos Norte  | 5.84%            | 5.91%            | 6.25%            | 5.66%           | 0.77%           | 0.78%           | 0.89%           | 0.69%           | 0.00%           | 0.00%           | 0.00%           | 0.00%           |
|               | (5.32% - 6.40%)  | (5.41% - 6.44%)  | (5.75% - 6.76%)  | (5.10% - 6.22%) | (0.58% - 0.98%) | (0.61% - 0.97%) | (0.72% - 1.08%) | (0.53% - 0.89%) | (0.00% - 0.00%) | (0.00% - 0.00%) | (0.00% - 0.01%) | (0.00% - 0.01%) |
| Ilocos Sur    | 7.50%            | 6.85%            | 7.33%            | 5.86%           | 1.38%           | 1.13%           | 1.31%           | 0.81%           | 0.00%           | 0.00%           | 0.03%           | 0.00%           |
|               | (6.92% - 8.15%)  | (6.29% - 7.45%)  | (6.78% - 7.91%)  | (5.33% - 6.43%) | (1.14% - 1.66%) | (0.92% - 1.37%) | (1.10% - 1.54%) | (0.63% - 1.02%) | (0.00% - 0.02%) | (0.00% - 0.02%) | (0.00% - 0.06%) | (0.00% - 0.02%) |
| Pangasinan    | 8.47%            | 8.22%            | 8.16%            | 6.45%           | 1.79%           | 1.67%           | 1.67%           | 1.04%           | 0.01%           | 0.02%           | 0.07%           | 0.01%           |
|               | (7.82% - 9.21%)  | (7.53% - 8.88%)  | (7.59% - 8.82%)  | (5.90% - 7.06%) | (1.50% - 2.12%) | (1.38% - 1.96%) | (1.42% - 1.94%) | (0.84% - 1.27%) | (0.00% - 0.05%) | (0.00% - 0.06%) | (0.03% - 0.12%) | (0.00% - 0.04%) |
| Nueva Vizcaya | 7.80%            | 7.47%            | 7.67%            | 6.57%           | 1.31%           | 1.18%           | 1.25%           | 0.90%           | 0.00%           | 0.00%           | 0.02%           | 0.01%           |
|               | (7.15% - 8.51%)  | (6.84% - 8.11%)  | (7.06% - 8.29%)  | (5.90% - 7.23%) | (1.06% - 1.62%) | (0.95% - 1.43%) | (1.02% - 1.49%) | (0.69% - 1.13%) | (0.00% - 0.02%) | (0.00% - 0.02%) | (0.00% - 0.06%) | (0.00% - 0.02%) |
| Cagayan       | 9.74%            | 8.92%            | 8.65%            | 6.95%           | 2.10%           | 1.74%           | 1.65%           | 1.06%           | 0.03%           | 0.02%           | 0.06%           | 0.01%           |
|               | (8.95% - 10.60%) | (8.22% - 9.68%)  | (8.00% - 9.33%)  | (6.34% - 7.59%) | (1.75% - 2.52%) | (1.44% - 2.06%) | (1.38% - 1.94%) | (0.84% - 1.30%) | (0.00% - 0.10%) | (0.00% - 0.07%) | (0.02% - 0.11%) | (0.00% - 0.04%) |
| Isabela       | 9.23%            | 8.53%            | 8.28%            | 6.74%           | 1.87%           | 1.56%           | 1.49%           | 0.97%           | 0.02%           | 0.02%           | 0.05%           | 0.01%           |
|               | (8.50% - 10.02%) | (7.85% - 9.32%)  | (7.69% - 8.91%)  | (6.13% - 7.36%) | (1.54% - 2.23%) | (1.29% - 1.89%) | (1.26% - 1.74%) | (0.76% - 1.20%) | (0.00% - 0.06%) | (0.00% - 0.05%) | (0.01% - 0.09%) | (0.00% - 0.03%) |
| Quirino       | 9.99%            | 8.79%            | 8.33%            | 6.51%           | 2.16%           | 1.68%           | 1.53%           | 0.92%           | 0.03%           | 0.02%           | 0.05%           | 0.00%           |
|               | (9.27% - 10.82%) | (8.11% - 9.55%)  | (7.71% - 9.04%)  | (5.89% - 7.09%) | (1.84% - 2.54%) | (1.40% - 1.99%) | (1.28% - 1.81%) | (0.72% - 1.13%) | (0.00% - 0.08%) | (0.00% - 0.05%) | (0.01% - 0.10%) | (0.00% - 0.02%) |
| Batanes       | 8.11%            | 7.47%            | 6.99%            | 6.13%           | 1.44%           | 1.20%           | 1.06%           | 0.79%           | 0.01%           | 0.01%           | 0.03%           | 0.01%           |
|               | (7.43% - 8.81%)  | (6.83% - 8.16%)  | (6.42% - 7.58%)  | (5.49% - 6.75%) | (1.16% - 1.74%) | (0.95% - 1.48%) | (0.86% - 1.28%) | (0.60% - 0.99%) | (0.00% - 0.05%) | (0.00% - 0.04%) | (0.01% - 0.07%) | (0.00% - 0.04%) |
| Bataan        | 7.26%            | 6.81%            | 7.09%            | 5.97%           | 1.32%           | 1.15%           | 1.26%           | 0.88%           | 0.00%           | 0.00%           | 0.03%           | 0.00%           |
|               | (6.72% - 7.88%)  | (6.29% - 7.37%)  | (6.57% - 7.63%)  | (5.44% - 6.51%) | (1.10% - 1.57%) | (0.94% - 1.37%) | (1.06% - 1.48%) | (0.69% - 1.08%) | (0.00% - 0.01%) | (0.00% - 0.01%) | (0.00% - 0.06%) | (0.00% - 0.02%) |
| Zambales      | 7.27%            | 7.31%            | 7.92%            | 6.35%           | 1.36%           | 1.36%           | 1.61%           | 1.04%           | 0.00%           | 0.01%           | 0.07%           | 0.01%           |
|               | (6.67% - 7.88%)  | (6.73% - 7.88%)  | (7.31% - 8.55%)  | (5.82% - 6.92%) | (1.11% - 1.63%) | (1.14% - 1.60%) | (1.37% - 1.88%) | (0.84% - 1.26%) | (0.00% - 0.01%) | (0.00% - 0.03%) | (0.03% - 0.12%) | (0.00% - 0.04%) |
| Tarlac        | 6.80%            | 6.35%            | 6.53%            | 5.57%           | 1.12%           | 0.96%           | 1.04%           | 0.72%           | 0.00%           | 0.00%           | 0.01%           | 0.00%           |
|               | (6.25% - 7.35%)  | (5.80% - 6.91%)  | (6.02% - 7.09%)  | (5.08% - 6.08%) | (0.91% - 1.34%) | (0.77% - 1.18%) | (0.85% - 1.24%) | (0.56% - 0.91%) | (0.00% - 0.00%) | (0.00% - 0.00%) | (0.00% - 0.03%) | (0.00% - 0.01%) |
| Pampanga      | 6.21%            | 5.87%            | 5.95%            | 5.45%           | 0.90%           | 0.78%           | 0.82%           | 0.66%           | 0.00%           | 0.00%           | 0.00%           | 0.00%           |
|               | (5.70% - 6.78%)  | (5.40% - 6.33%)  | (5.48% - 6.43%)  | (4.95% - 5.99%) | (0.72% - 1.12%) | (0.62% - 0.95%) | (0.66% - 1.00%) | (0.50% - 0.85%) | (0.00% - 0.00%) | (0.00% - 0.00%) | (0.00% - 0.02%) | (0.00% - 0.01%) |
| Bulacan       | 6.81%            | 6.29%            | 6.76%            | 5.45%           | 1.14%           | 0.96%           | 1.13%           | 0.70%           | 0.00%           | 0.00%           | 0.02%           | 0.00%           |
|               | (6.28% - 7.39%)  | (5.80% - 6.84%)  | (6.23% - 7.33%)  | (4.95% - 5.91%) | (0.93% - 1.38%) | (0.78% - 1.16%) | (0.93% - 1.35%) | (0.54% - 0.86%) | (0.00% - 0.00%) | (0.00% - 0.00%) | (0.00% - 0.04%) | (0.00% - 0.01%) |
| Nueva Ecija   | 7.03%            | 6.94%            | 7.17%            | 5.53%           | 1.23%           | 1.19%           | 1.29%           | 0.74%           | 0.00%           | 0.00%           | 0.03%           | 0.00%           |
|               | (6.49% - 7.65%)  | (6.40% - 7.51%)  | (6.62% - 7.73%)  | (5.06% - 6.01%) | (1.02% - 1.50%) | (0.98% - 1.42%) | (1.07% - 1.50%) | (0.58% - 0.91%) | (0.00% - 0.00%) | (0.00% - 0.02%) | (0.00% - 0.06%) | (0.00% - 0.01%) |
| Aurora        | 9.67%            | 9.43%            | 9.37%            | 7.33%           | 2.44%           | 2.32%           | 2.32%           | 1.47%           | 0.11%           | 0.12%           | 0.22%           | 0.06%           |
|               | (8.92% - 10.44%) | (8.75% - 10.13%) | (8.70% - 10.07%) | (6.68% - 7.96%) | (2.08% - 2.84%) | (2.00% - 2.67%) | (1.99% - 2.65%) | (1.21% - 1.74%) | (0.04% - 0.22%) | (0.06% - 0.21%) | (0.14% - 0.31%) | (0.02% - 0.11%) |
| Rizal         | 6.50%            | 6.36%            | 6.80%            | 5.60%           | 1.13%           | 1.07%           | 1.23%           | 0.82%           | 0.00%           | 0.00%           | 0.02%           | 0.00%           |
|               | (5.99% - 7.10%)  | (5.89% - 6.93%)  | (6.28% - 7.36%)  | (5.12% - 6.12%) | (0.93% - 1.39%) | (0.89% - 1.30%) | (1.02% - 1.45%) | (0.65% - 1.01%) | (0.00% - 0.00%) | (0.00% - 0.01%) | (0.00% - 0.05%) | (0.00% - 0.02%) |
| Cavite        | 6.04%            | 6.26%            | 6.64%            | 5.30%           | 0.96%           | 1.02%           | 1.17%           | 0.71%           | 0.00%           | 0.00%           | 0.02%           | 0.00%           |
|               | (5.52% - 6.59%)  | (5.73% - 6.83%)  | (6.14% - 7.16%)  | (4.80% - 5.77%) | (0.77% - 1.19%) | (0.82% - 1.26%) | (0.97% - 1.37%) | (0.55% - 0.89%) | (0.00% - 0.00%) | (0.00% - 0.01%) | (0.00% - 0.05%) | (0.00% - 0.01%) |
| Laguna        | 6.41%            | 6.58%            | 6.81%            | 5.41%           | 1.10%           | 1.14%           | 1.23%           | 0.75%           | 0.00%           | 0.00%           | 0.02%           | 0.00%           |
|               | (5.94% - 6.94%)  | (6.09% - 7.09%)  | (6.31% - 7.35%)  | (4.98% - 5.90%) | (0.90% - 1.32%) | (0.94% - 1.35%) | (1.03% - 1.45%) | (0.59% - 0.94%) | (0.00% - 0.00%) | (0.00% - 0.01%) | (0.00% - 0.06%) | (0.00% - 0.01%) |
| Batangas      | 6.79%            | 6.78%            | 6.40%            | 5.24%           | 1.21%           | 1.19%           | 1.07%           | 0.68%           | 0.00%           | 0.00%           | 0.01%           | 0.00%           |
|               | (6.28% - 7.39%)  | (6.24% - 7.34%)  | (5.92% - 6.91%)  | (4.78% - 5.67%) | (1.01% - 1.46%) | (0.98% - 1.43%) | (0.89% - 1.28%) | (0.53% - 0.84%) | (0.00% - 0.00%) | (0.00% - 0.02%) | (0.00% - 0.04%) | (0.00% - 0.01%) |

Table S8b. Estimated overall, severe, and extreme wasting prevalence (%) in children under 5 years, both sexes, in 1990, 2000, 2010, and 2020.

| Location           | Total             |                   |                   |                 | Severe          |                 |                 |                 | Extreme         |                 |                 |                 |
|--------------------|-------------------|-------------------|-------------------|-----------------|-----------------|-----------------|-----------------|-----------------|-----------------|-----------------|-----------------|-----------------|
|                    | 1990              | 2000              | 2010              | 2020            | 1990            | 2000            | 2010            | 2020            | 1990            | 2000            | 2010            | 2020            |
| Quezon             | 8.81%             | 8.54%             | 8.80%             | 6.99%           | 2.14%           | 2.01%           | 2.12%           | 1.38%           | 0.05%           | 0.06%           | 0.15%           | 0.04%           |
|                    | (8.08% - 9.54%)   | (7.86% - 9.31%)   | (8.15% - 9.51%)   | (6.40% - 7.63%) | (1.78% - 2.51%) | (1.70% - 2.36%) | (1.82% - 2.46%) | (1.13% - 1.65%) | (0.00% - 0.15%) | (0.02% - 0.11%) | (0.09% - 0.22%) | (0.01% - 0.08%) |
| Occidental Mindoro | 10.42%            | 10.06%            | 8.90%             | 7.33%           | 2.37%           | 2.19%           | 2.45%           | 1.73%           | 0.05%           | 0.06%           | 0.18%           | 0.06%           |
|                    | (9.66% - 11.22%)  | (9.28% - 10.88%)  | (9.92% - 11.43%)  | (8.16% - 9.66%) | (2.02% - 2.76%) | (1.84% - 2.57%) | (2.11% - 2.80%) | (1.42% - 2.05%) | (0.00% - 0.15%) | (0.01% - 0.12%) | (0.11% - 0.27%) | (0.02% - 0.12%) |
| Oriental Mindoro   | 10.17%            | 9.55%             | 9.44%             | 7.33%           | 2.19%           | 1.91%           | 1.88%           | 1.13%           | 0.03%           | 0.03%           | 0.08%           | 0.01%           |
|                    | (9.41% - 11.01%)  | (8.79% - 10.31%)  | (8.71% - 10.13%)  | (6.71% - 8.00%) | (1.83% - 2.57%) | (1.58% - 2.26%) | (1.60% - 2.18%) | (0.91% - 1.38%) | (0.00% - 0.10%) | (0.00% - 0.07%) | (0.03% - 0.14%) | (0.00% - 0.04%) |
| Romblon            | 10.94%            | 10.33%            | 9.94%             | 7.70%           | 2.52%           | 2.24%           | 2.10%           | 1.27%           | 0.07%           | 0.06%           | 0.12%           | 0.02%           |
|                    | (10.13% - 11.83%) | (9.60% - 11.16%)  | (9.24% - 10.76%)  | (7.08% - 8.42%) | (2.12% - 2.97%) | (1.90% - 2.62%) | (1.81% - 2.44%) | (1.03% - 1.55%) | (0.01% - 0.18%) | (0.02% - 0.13%) | (0.06% - 0.19%) | (0.00% - 0.05%) |
| Palawan            | 11.50%            | 10.86%            | 11.23%            | 8.22%           | 2.87%           | 2.54%           | 2.71%           | 1.51%           | 0.15%           | 0.11%           | 0.24%           | 0.04%           |
|                    | (10.64% - 12.39%) | (10.04% - 11.69%) | (10.44% - 12.08%) | (7.50% - 8.92%) | (2.45% - 3.34%) | (2.16% - 2.94%) | (2.36% - 3.11%) | (1.23% - 1.81%) | (0.05% - 0.30%) | (0.04% - 0.19%) | (0.15% - 0.34%) | (0.01% - 0.09%) |
| Marinduque         | 10.73%            | 9.88%             | 9.92%             | 8.03%           | 2.45%           | 2.07%           | 2.09%           | 1.39%           | 0.06%           | 0.04%           | 0.11%           | 0.03%           |
|                    | (9.92% - 11.60%)  | (9.15% - 10.69%)  | (9.21% - 10.69%)  | (7.37% - 8.76%) | (2.08% - 2.91%) | (1.75% - 2.44%) | (1.79% - 2.41%) | (1.14% - 1.69%) | (0.01% - 0.17%) | (0.01% - 0.10%) | (0.06% - 0.18%) | (0.00% - 0.07%) |
| Catanduanes        | 8.49%             | 8.01%             | 8.18%             | 6.85%           | 1.57%           | 1.39%           | 1.47%           | 1.02%           | 0.00%           | 0.00%           | 0.04%           | 0.01%           |
|                    | (7.80% - 9.24%)   | (7.35% - 8.67%)   | (7.59% - 8.80%)   | (6.28% - 7.47%) | (1.29% - 1.89%) | (1.15% - 1.67%) | (1.24% - 1.73%) | (0.81% - 1.25%) | (0.00% - 0.02%) | (0.00% - 0.02%) | (0.01% - 0.08%) | (0.00% - 0.03%) |
| Camarines Norte    | 9.04%             | 8.59%             | 9.39%             | 7.26%           | 1.85%           | 1.66%           | 2.00%           | 1.22%           | 0.01%           | 0.02%           | 0.12%           | 0.02%           |
|                    | (8.37% - 9.75%)   | (7.93% - 9.34%)   | (8.68% - 10.12%)  | (6.67% - 7.94%) | (1.57% - 2.17%) | (1.39% - 1.98%) | (1.72% - 2.32%) | (0.99% - 1.48%) | (0.00% - 0.05%) | (0.00% - 0.05%) | (0.06% - 0.19%) | (0.00% - 0.05%) |
| Sorsogon           | 8.95%             | 8.29%             | 8.17%             | 6.60%           | 1.75%           | 1.49%           | 1.47%           | 0.94%           | 0.01%           | 0.01%           | 0.04%           | 0.01%           |
|                    | (8.21% - 9.69%)   | (7.66% - 9.03%)   | (7.58% - 8.80%)   | (6.02% - 7.24%) | (1.43% - 2.08%) | (1.24% - 1.80%) | (1.23% - 1.72%) | (0.73% - 1.17%) | (0.00% - 0.04%) | (0.00% - 0.03%) | (0.01% - 0.08%) | (0.00% - 0.02%) |
| Albay              | 8.61%             | 8.35%             | 8.18%             | 6.32%           | 1.62%           | 1.50%           | 1.47%           | 0.86%           | 0.00%           | 0.01%           | 0.04%           | 0.00%           |
|                    | (8.02% - 9.31%)   | (7.67% - 9.08%)   | (7.55% - 8.80%)   | (5.77% - 6.90%) | (1.37% - 1.92%) | (1.24% - 1.79%) | (1.22% - 1.73%) | (0.67% - 1.07%) | (0.00% - 0.02%) | (0.00% - 0.03%) | (0.01% - 0.09%) | (0.00% - 0.02%) |
| Masbate            | 10.95%            | 11.18%            | 11.29%            | 8.89%           | 2.74%           | 2.83%           | 2.92%           | 1.92%           | 0.15%           | 0.20%           | 0.33%           | 0.11%           |
|                    | (10.17% - 11.83%) | (10.35% - 12.06%) | (10.49% - 12.07%) | (8.18% - 9.64%) | (2.36% - 3.19%) | (2.43% - 3.27%) | (2.56% - 3.32%) | (1.61% - 2.25%) | (0.05% - 0.28%) | (0.11% - 0.32%) | (0.23% - 0.44%) | (0.05% - 0.18%) |
| Camarines Sur      | 8.80%             | 8.49%             | 8.71%             | 6.89%           | 1.72%           | 1.59%           | 1.70%           | 1.07%           | 0.01%           | 0.01%           | 0.07%           | 0.01%           |
|                    | (8.07% - 9.52%)   | (7.79% - 9.19%)   | (8.09% - 9.39%)   | (6.32% - 7.56%) | (1.42% - 2.03%) | (1.31% - 1.87%) | (1.45% - 1.99%) | (0.86% - 1.31%) | (0.00% - 0.03%) | (0.00% - 0.04%) | (0.03% - 0.12%) | (0.00% - 0.04%) |
| Capiz              | 9.14%             | 8.80%             | 8.75%             | 6.69%           | 2.08%           | 1.93%           | 1.94%           | 1.16%           | 0.04%           | 0.05%           | 0.12%           | 0.02%           |
|                    | (8.40% - 9.84%)   | (8.11% - 9.54%)   | (8.06% - 9.42%)   | (6.14% - 7.30%) | (1.74% - 2.40%) | (1.63% - 2.27%) | (1.66% - 2.22%) | (0.95% - 1.40%) | (0.00% - 0.11%) | (0.01% - 0.10%) | (0.06% - 0.19%) | (0.00% - 0.05%) |
| Aklan              | 7.57%             | 7.37%             | 7.16%             | 6.08%           | 1.39%           | 1.31%           | 1.25%           | 0.89%           | 0.00%           | 0.00%           | 0.02%           | 0.00%           |
|                    | (7.00% - 8.21%)   | (6.79% - 8.02%)   | (6.61% - 7.74%)   | (5.57% - 6.63%) | (1.16% - 1.66%) | (1.08% - 1.56%) | (1.04% - 1.48%) | (0.70% - 1.10%) | (0.00% - 0.01%) | (0.00% - 0.02%) | (0.00% - 0.06%) | (0.00% - 0.02%) |
| Antique            | 8.88%             | 8.41%             | 8.68%             | 6.63%           | 1.97%           | 1.77%           | 1.91%           | 1.13%           | 0.03%           | 0.03%           | 0.11%           | 0.02%           |
|                    | (8.21% - 9.60%)   | (7.77% - 9.11%)   | (8.07% - 9.35%)   | (6.05% - 7.22%) | (1.67% - 2.31%) | (1.50% - 2.07%) | (1.64% - 2.21%) | (0.92% - 1.37%) | (0.00% - 0.08%) | (0.00% - 0.08%) | (0.06% - 0.18%) | (0.00% - 0.05%) |
| Negros Occidental  | 8.74%             | 8.56%             | 8.88%             | 7.74%           | 1.94%           | 1.85%           | 2.02%           | 1.56%           | 0.02%           | 0.04%           | 0.14%           | 0.06%           |
|                    | (8.07% - 9.44%)   | (7.89% - 9.21%)   | (8.23% - 9.51%)   | (7.14% - 8.37%) | (1.65% - 2.26%) | (1.57% - 2.14%) | (1.73% - 2.31%) | (1.31% - 1.84%) | (0.00% - 0.07%) | (0.01% - 0.09%) | (0.07% - 0.21%) | (0.02% - 0.11%) |
| Iloilo             | 7.05%             | 7.18%             | 7.45%             | 6.15%           | 1.21%           | 1.25%           | 1.37%           | 0.92%           | 0.00%           | 0.00%           | 0.04%           | 0.01%           |
|                    | (6.49% - 7.63%)   | (6.61% - 7.78%)   | (6.87% - 8.03%)   | (5.63% - 6.69%) | (0.99% - 1.45%) | (1.02% - 1.49%) | (1.16% - 1.61%) | (0.74% - 1.13%) | (0.00% - 0.00%) | (0.00% - 0.02%) | (0.01% - 0.07%) | (0.00% - 0.03%) |
| Guimaras           | 8.57%             | 7.96%             | 6.99%             | 5.67%           | 1.81%           | 1.56%           | 1.23%           | 0.78%           | 0.02%           | 0.02%           | 0.03%           | 0.00%           |
|                    | (7.89% - 9.27%)   | (7.32% - 8.65%)   | (6.44% - 7.55%)   | (5.17% - 6.23%) | (1.52% - 2.13%) | (1.30% - 1.85%) | (1.02% - 1.46%) | (0.62% - 0.98%) | (0.00% - 0.05%) | (0.00% - 0.05%) | (0.00% - 0.07%) | (0.00% - 0.02%) |
| Negros Oriental    | 9.50%             | 9.11%             | 9.44%             | 7.57%           | 2.22%           | 2.04%           | 1.47%           | 2.21%           | 0.05%           | 0.06%           | 0.17%           | 0.05%           |
|                    | (8.74% - 10.29%)  | (8.39% - 9.84%)   | (8.79% - 10.13%)  | (6.94% - 8.21%) | (1.87% - 2.60%) | (1.73% - 2.39%) | (1.93% - 2.53%) | (1.22% - 1.74%) | (0.01% - 0.13%) | (0.02% - 0.12%) | (0.10% - 0.25%) | (0.01% - 0.10%) |
| Cebu               | 8.57%             | 8.52%             | 8.17%             | 6.69%           | 1.76%           | 1.73%           | 1.63%           | 1.10%           | 0.01%           | 0.02%           | 0.06%           | 0.01%           |
|                    | (7.94% - 9.28%)   | (7.84% - 9.19%)   | (7.59% - 8.78%)   | (6.14% - 7.27%) | (1.49% - 2.09%) | (1.45% - 2.02%) | (1.39% - 1.88%) | (0.89% - 1.32%) | (0.00% - 0.03%) | (0.00% - 0.06%) | (0.03% - 0.11%) | (0.00% - 0.04%) |
| Bahol              | 9.20%             | 8.54%             | 8.17%             | 6.75%           | 2.01%           | 1.73%           | 1.62%           | 1.11%           | 0.02%           | 0.02%           | 0.06%           | 0.01%           |
|                    | (8.51% - 9.96%)   | (7.87% - 9.22%)   | (7.57% - 8.86%)   | (6.18% - 7.37%) | (1.70% - 2.36%) | (1.46% - 2.03%) | (1.38% - 1.89%) | (0.91% - 1.35%) | (0.00% - 0.07%) | (0.00% - 0.07%) | (0.02% - 0.11%) | (0.00% - 0.04%) |
| Siquijor           | 9.47%             | 8.41%             | 7.99%             | 6.65%           | 2.19%           | 1.75%           | 1.61%           | 1.11%           | 0.06%           | 0.04%           | 0.08%           | 0.02%           |
|                    | (8.75% - 10.25%)  | (7.73% - 9.14%)   | (7.40% - 8.60%)   | (6.10% - 7.23%) | (1.87% - 2.57%) | (1.47% - 2.05%) | (1.37% - 1.86%) | (0.89% - 1.33%) | (0.01% - 0.12%) | (0.01% - 0.09%) | (0.03% - 0.13%) | (0.00% - 0.06%) |
| Southern Leyte     | 8.33%             | 7.74%             | 7.73%             | 6.49%           | 1.50%           | 1.27%           | 1.28%           | 0.87%           | 0.00%           | 0.00%           | 0.02%           | 0.00%           |
|                    | (7.65% - 9.03%)   | (7.11% - 8.38%)   | (7.15% - 8.36%)   | (5.88% - 7.13%) | (1.21% - 1.81%) | (1.03% - 1.53%) | (1.07% - 1.53%) | (0.67% - 1.09%) | (0.00% - 0.01%) | (0.00% - 0.01%) | (0.00% - 0.05%) | (0.00% - 0.02%) |

**Table S8b. Estimated overall, severe, and extreme wasting prevalence (%) in children under 5 years, both sexes, in 1990, 2000, 2010, and 2020.**

| Location                         | Total             |                   |                   |                 | Severe          |                 |                 |                 | Extreme         |                 |                 |                 |
|----------------------------------|-------------------|-------------------|-------------------|-----------------|-----------------|-----------------|-----------------|-----------------|-----------------|-----------------|-----------------|-----------------|
|                                  | 1990              | 2000              | 2010              | 2020            | 1990            | 2000            | 2010            | 2020            | 1990            | 2000            | 2010            | 2020            |
| <i>Eastern Samar</i>             | 11.07%            | 10.40%            | 9.85%             | 7.72%           | 2.72%           | 2.40%           | 2.18%           | 1.39%           | 0.12%           | 0.08%           | 0.13%           | 0.02%           |
|                                  | (10.22% - 11.96%) | (9.61% - 11.33%)  | (9.13% - 10.61%)  | (7.07% - 8.36%) | (2.29% - 3.18%) | (2.02% - 2.82%) | (1.88% - 2.52%) | (1.14% - 1.66%) | (0.03% - 0.26%) | (0.02% - 0.17%) | (0.07% - 0.20%) | (0.00% - 0.06%) |
| <i>Northern Samar</i>            | 11.49%            | 11.33%            | 11.34%            | 8.49%           | 3.00%           | 2.89%           | 2.90%           | 1.72%           | 0.21%           | 0.19%           | 0.29%           | 0.06%           |
|                                  | (10.62% - 12.36%) | (10.45% - 12.21%) | (10.61% - 12.18%) | (7.82% - 9.25%) | (2.57% - 3.47%) | (2.47% - 3.33%) | (2.55% - 3.30%) | (1.45% - 2.04%) | (0.08% - 0.38%) | (0.10% - 0.33%) | (0.20% - 0.39%) | (0.02% - 0.12%) |
| <i>Samar (Western Samar)</i>     | 11.22%            | 10.83%            | 10.69%            | 8.37%           | 2.85%           | 2.63%           | 2.59%           | 1.66%           | 0.16%           | 0.13%           | 0.21%           | 0.05%           |
|                                  | (10.39% - 12.10%) | (10.03% - 11.75%) | (9.98% - 11.43%)  | (7.68% - 9.13%) | (2.45% - 3.31%) | (2.25% - 3.09%) | (2.25% - 2.94%) | (1.36% - 1.99%) | (0.05% - 0.32%) | (0.06% - 0.24%) | (0.14% - 0.31%) | (0.01% - 0.11%) |
| <i>Leyte</i>                     | 10.69%            | 10.04%            | 9.41%             | 7.18%           | 2.52%           | 2.20%           | 1.98%           | 1.19%           | 0.07%           | 0.05%           | 0.09%           | 0.01%           |
|                                  | (9.88% - 11.51%)  | (9.22% - 10.89%)  | (8.70% - 10.15%)  | (6.55% - 7.82%) | (2.12% - 2.91%) | (1.84% - 2.62%) | (1.68% - 2.30%) | (0.95% - 1.44%) | (0.01% - 0.18%) | (0.01% - 0.11%) | (0.04% - 0.16%) | (0.00% - 0.04%) |
| <i>Billiran</i>                  | 8.50%             | 7.69%             | 7.30%             | 6.34%           | 1.61%           | 1.30%           | 1.18%           | 0.86%           | 0.00%           | 0.00%           | 0.02%           | 0.01%           |
|                                  | (7.84% - 9.20%)   | (7.03% - 8.37%)   | (6.77% - 7.89%)   | (5.75% - 6.94%) | (1.32% - 1.93%) | (1.04% - 1.57%) | (0.98% - 1.42%) | (0.66% - 1.08%) | (0.00% - 0.02%) | (0.00% - 0.02%) | (0.00% - 0.05%) | (0.00% - 0.02%) |
| <i>Zamboanga Sibugay</i>         | 10.01%            | 10.29%            | 9.93%             | 7.50%           | 2.55%           | 2.64%           | 2.49%           | 1.51%           | 0.12%           | 0.16%           | 0.21%           | 0.04%           |
|                                  | (9.27% - 10.85%)  | (9.47% - 11.15%)  | (9.17% - 10.72%)  | (6.88% - 8.17%) | (2.19% - 2.98%) | (2.26% - 3.06%) | (2.14% - 2.86%) | (1.24% - 1.80%) | (0.03% - 0.26%) | (0.08% - 0.29%) | (0.14% - 0.30%) | (0.01% - 0.10%) |
| <i>Zamboanga Del Norte</i>       | 10.17%            | 9.90%             | 9.84%             | 8.00%           | 2.63%           | 2.47%           | 2.45%           | 1.69%           | 0.14%           | 0.12%           | 0.20%           | 0.06%           |
|                                  | (9.39% - 10.97%)  | (9.18% - 10.73%)  | (9.15% - 10.62%)  | (7.31% - 8.70%) | (2.24% - 3.05%) | (2.15% - 2.88%) | (2.14% - 2.80%) | (1.40% - 2.00%) | (0.04% - 0.28%) | (0.05% - 0.22%) | (0.12% - 0.29%) | (0.02% - 0.12%) |
| <i>Zamboanga Del Sur</i>         | 10.10%            | 9.67%             | 9.75%             | 7.81%           | 2.59%           | 2.36%           | 2.41%           | 1.62%           | 0.13%           | 0.10%           | 0.19%           | 0.05%           |
|                                  | (9.35% - 10.88%)  | (8.96% - 10.39%)  | (9.00% - 10.48%)  | (7.17% - 8.48%) | (2.21% - 2.99%) | (2.04% - 2.72%) | (2.06% - 2.76%) | (1.35% - 1.92%) | (0.03% - 0.26%) | (0.04% - 0.19%) | (0.12% - 0.28%) | (0.02% - 0.11%) |
| <i>Misamis Occidental</i>        | 8.67%             | 8.37%             | 8.93%             | 7.18%           | 1.78%           | 1.65%           | 1.86%           | 1.23%           | 0.01%           | 0.01%           | 0.08%           | 0.01%           |
|                                  | (7.98% - 9.37%)   | (7.72% - 9.08%)   | (8.29% - 9.65%)   | (6.60% - 7.79%) | (1.50% - 2.12%) | (1.37% - 1.96%) | (1.61% - 2.16%) | (1.01% - 1.48%) | (0.00% - 0.04%) | (0.00% - 0.04%) | (0.03% - 0.14%) | (0.00% - 0.04%) |
| <i>Bukidnon</i>                  | 10.78%            | 10.30%            | 10.17%            | 7.46%           | 2.73%           | 2.48%           | 2.43%           | 1.39%           | 0.14%           | 0.11%           | 0.18%           | 0.03%           |
|                                  | (9.96% - 11.63%)  | (9.59% - 11.10%)  | (9.41% - 10.92%)  | (6.81% - 8.11%) | (2.32% - 3.18%) | (2.15% - 2.88%) | (2.09% - 2.76%) | (1.12% - 1.66%) | (0.04% - 0.29%) | (0.04% - 0.20%) | (0.11% - 0.27%) | (0.00% - 0.06%) |
| <i>Lanao Del Norte</i>           | 9.24%             | 9.17%             | 9.56%             | 7.77%           | 2.05%           | 1.99%           | 2.16%           | 1.45%           | 0.02%           | 0.03%           | 0.13%           | 0.03%           |
|                                  | (8.51% - 9.97%)   | (8.47% - 9.92%)   | (8.85% - 10.31%)  | (7.10% - 8.45%) | (1.71% - 2.40%) | (1.70% - 2.33%) | (1.85% - 2.48%) | (1.18% - 1.74%) | (0.00% - 0.09%) | (0.00% - 0.08%) | (0.07% - 0.20%) | (0.00% - 0.07%) |
| <i>Misamis Oriental</i>          | 8.57%             | 8.38%             | 8.11%             | 7.02%           | 1.70%           | 1.61%           | 1.52%           | 1.15%           | 0.00%           | 0.01%           | 0.04%           | 0.01%           |
|                                  | (7.85% - 9.31%)   | (7.69% - 9.13%)   | (7.49% - 8.72%)   | (6.41% - 7.66%) | (1.40% - 2.04%) | (1.31% - 1.91%) | (1.28% - 1.77%) | (0.92% - 1.40%) | (0.00% - 0.03%) | (0.00% - 0.04%) | (0.01% - 0.07%) | (0.00% - 0.04%) |
| <i>Camiguin</i>                  | 8.95%             | 8.25%             | 7.76%             | 6.26%           | 1.89%           | 1.60%           | 1.43%           | 0.90%           | 0.01%           | 0.01%           | 0.04%           | 0.01%           |
|                                  | (8.28% - 9.69%)   | (7.64% - 8.96%)   | (7.13% - 8.41%)   | (5.67% - 6.82%) | (1.58% - 2.24%) | (1.36% - 1.89%) | (1.19% - 1.69%) | (0.71% - 1.11%) | (0.00% - 0.05%) | (0.00% - 0.04%) | (0.01% - 0.07%) | (0.00% - 0.02%) |
| <i>Davao Oriental</i>            | 10.75%            | 10.04%            | 10.11%            | 8.11%           | 2.77%           | 2.43%           | 2.50%           | 1.69%           | 0.17%           | 0.13%           | 0.23%           | 0.08%           |
|                                  | (9.98% - 11.69%)  | (9.31% - 10.84%)  | (9.36% - 10.89%)  | (7.43% - 8.86%) | (2.39% - 3.26%) | (2.09% - 2.80%) | (2.17% - 2.87%) | (1.41% - 2.01%) | (0.07% - 0.32%) | (0.05% - 0.21%) | (0.15% - 0.33%) | (0.03% - 0.14%) |
| <i>Davao de Oro</i>              | 9.88%             | 9.45%             | 9.04%             | 7.10%           | 2.32%           | 2.12%           | 1.99%           | 1.25%           | 0.06%           | 0.07%           | 0.12%           | 0.03%           |
|                                  | (9.14% - 10.77%)  | (8.66% - 10.26%)  | (8.37% - 9.73%)   | (6.52% - 7.76%) | (1.98% - 2.74%) | (1.79% - 2.49%) | (1.70% - 2.28%) | (1.03% - 1.50%) | (0.01% - 0.15%) | (0.02% - 0.14%) | (0.07% - 0.19%) | (0.00% - 0.06%) |
| <i>Davao Del Sur</i>             | 10.08%            | 9.45%             | 9.08%             | 7.25%           | 2.42%           | 2.13%           | 2.01%           | 1.32%           | 0.08%           | 0.07%           | 0.13%           | 0.03%           |
|                                  | (9.33% - 10.82%)  | (8.69% - 10.24%)  | (8.41% - 9.80%)   | (6.64% - 7.89%) | (2.06% - 2.79%) | (1.80% - 2.51%) | (1.73% - 2.32%) | (1.08% - 1.58%) | (0.02% - 0.18%) | (0.02% - 0.14%) | (0.07% - 0.20%) | (0.00% - 0.07%) |
| <i>Davao Occidental</i>          | 9.79%             | 9.86%             | 9.94%             | 7.75%           | 2.33%           | 2.34%           | 2.41%           | 1.52%           | 0.07%           | 0.11%           | 0.21%           | 0.05%           |
|                                  | (9.03% - 10.59%)  | (9.13% - 10.67%)  | (9.25% - 10.73%)  | (7.14% - 8.47%) | (1.98% - 2.73%) | (2.02% - 2.74%) | (2.09% - 2.76%) | (1.28% - 1.81%) | (0.01% - 0.16%) | (0.05% - 0.19%) | (0.13% - 0.31%) | (0.01% - 0.11%) |
| <i>Davao Del Norte</i>           | 9.64%             | 8.93%             | 8.48%             | 7.17%           | 2.16%           | 1.86%           | 1.73%           | 1.26%           | 0.04%           | 0.04%           | 0.08%           | 0.03%           |
|                                  | (8.92% - 10.37%)  | (8.20% - 9.65%)   | (7.83% - 9.14%)   | (6.56% - 7.87%) | (1.84% - 2.51%) | (1.55% - 2.16%) | (1.45% - 2.01%) | (1.03% - 1.54%) | (0.00% - 0.10%) | (0.01% - 0.08%) | (0.04% - 0.14%) | (0.00% - 0.06%) |
| <i>South Cotabato</i>            | 9.45%             | 9.03%             | 9.45%             | 7.55%           | 2.09%           | 1.90%           | 1.36%           | 0.88%           | 0.02%           | 0.03%           | 0.12%           | 0.03%           |
|                                  | (8.74% - 10.20%)  | (8.29% - 9.76%)   | (8.80% - 10.16%)  | (6.90% - 8.26%) | (1.75% - 2.47%) | (1.58% - 2.24%) | (1.79% - 2.39%) | (1.11% - 1.66%) | (0.00% - 0.09%) | (0.00% - 0.07%) | (0.06% - 0.18%) | (0.00% - 0.06%) |
| <i>Sultan Kudarat</i>            | 10.02%            | 9.82%             | 9.88%             | 8.01%           | 2.36%           | 2.24%           | 2.28%           | 1.53%           | 0.06%           | 0.06%           | 0.15%           | 0.04%           |
|                                  | (9.26% - 10.84%)  | (9.11% - 10.60%)  | (9.15% - 10.62%)  | (7.35% - 8.73%) | (2.01% - 2.76%) | (1.91% - 2.63%) | (1.96% - 2.61%) | (1.26% - 1.84%) | (0.00% - 0.16%) | (0.02% - 0.13%) | (0.08% - 0.23%) | (0.01% - 0.09%) |
| <i>Cotabato (North Cotabato)</i> | 9.40%             | 9.44%             | 10.06%            | 8.12%           | 2.12%           | 2.11%           | 2.36%           | 1.58%           | 0.03%           | 0.05%           | 0.17%           | 0.04%           |
|                                  | (8.75% - 10.18%)  | (8.70% - 10.20%)  | (9.33% - 10.84%)  | (7.46% - 8.80%) | (1.82% - 2.50%) | (1.78% - 2.45%) | (2.05% - 2.72%) | (1.32% - 1.87%) | (0.00% - 0.10%) | (0.01% - 0.11%) | (0.10% - 0.25%) | (0.01% - 0.09%) |
| <i>Sarangani</i>                 | 9.61%             | 9.28%             | 9.43%             | 7.81%           | 2.19%           | 2.02%           | 2.07%           | 1.45%           | 0.03%           | 0.04%           | 0.12%           | 0.03%           |
|                                  | (8.82% - 10.40%)  | (8.53% - 10.08%)  | (8.66% - 10.28%)  | (7.09% - 8.57%) | (1.84% - 2.58%) | (1.69% - 2.40%) | (1.74% - 2.44%) | (1.17% - 1.76%) | (0.00% - 0.12%) | (0.01% - 0.09%) | (0.06% - 0.18%) | (0.01% - 0.08%) |
| <i>Agusan Del Norte</i>          | 9.92%             | 9.65%             | 10.23%            | 7.96%           | 2.23%           | 2.09%           | 2.34%           | 1.49%           | 0.03%           | 0.04%           | 0.16%           | 0.03%           |
|                                  | (9.18% - 10.69%)  | (8.88% - 10.46%)  | (9.49% - 11.01%)  | (7.35% - 8.68%) | (1.89% - 2.60%) | (1.75% - 2.45%) | (2.02% - 2.69%) | (1.25% - 1.79%) | (0.00% - 0.11%) | (0.01% - 0.10%) | (0.10% - 0.24%) | (0.00% - 0.08%) |

Table S8b. Estimated overall, severe, and extreme wasting prevalence (%) in children under 5 years, both sexes, in 1990, 2000, 2010, and 2020.

| Location                         | Total             |                   |                   |                   | Severe          |                 |                 |                 | Extreme         |                 |                 |                 |
|----------------------------------|-------------------|-------------------|-------------------|-------------------|-----------------|-----------------|-----------------|-----------------|-----------------|-----------------|-----------------|-----------------|
|                                  | 1990              | 2000              | 2010              | 2020              | 1990            | 2000            | 2010            | 2020            | 1990            | 2000            | 2010            | 2020            |
| Agusan Del Sur                   | 10.45%            | 10.21%            | 10.58%            | 8.69%             | 2.49%           | 2.35%           | 2.53%           | 1.75%           | 0.08%           | 0.08%           | 0.20%           | 0.06%           |
|                                  | (9.70% - 11.31%)  | (9.42% - 10.99%)  | (9.81% - 11.31%)  | (7.97% - 9.44%)   | (2.12% - 2.94%) | (2.00% - 2.73%) | (2.18% - 2.88%) | (1.46% - 2.07%) | (0.01% - 0.20%) | (0.02% - 0.15%) | (0.12% - 0.29%) | (0.02% - 0.12%) |
| Surigao Del Sur                  | 10.22%            | 9.67%             | 9.21%             | 7.10%             | 2.30%           | 2.05%           | 1.88%           | 1.14%           | 0.04%           | 0.04%           | 0.08%           | 0.01%           |
|                                  | (9.45% - 11.09%)  | (8.89% - 10.47%)  | (8.49% - 9.98%)   | (6.49% - 7.76%)   | (1.92% - 2.74%) | (1.70% - 2.41%) | (1.59% - 2.22%) | (0.91% - 1.40%) | (0.00% - 0.13%) | (0.00% - 0.09%) | (0.04% - 0.14%) | (0.00% - 0.04%) |
| Surigao Del Norte                | 10.89%            | 10.27%            | 9.79%             | 7.86%             | 2.65%           | 2.34%           | 2.15%           | 1.43%           | 0.10%           | 0.08%           | 0.12%           | 0.03%           |
|                                  | (10.08% - 11.76%) | (9.46% - 11.11%)  | (9.09% - 10.56%)  | (7.23% - 8.62%)   | (2.25% - 3.07%) | (1.96% - 2.73%) | (1.85% - 2.51%) | (1.18% - 1.72%) | (0.02% - 0.22%) | (0.02% - 0.15%) | (0.06% - 0.20%) | (0.00% - 0.07%) |
| Dinagat Islands                  | 9.34%             | 8.57%             | 7.83%             | 6.00%             | 1.94%           | 1.62%           | 1.36%           | 0.78%           | 0.02%           | 0.02%           | 0.03%           | 0.00%           |
|                                  | (8.59% - 10.16%)  | (7.90% - 9.29%)   | (7.25% - 8.48%)   | (5.42% - 6.53%)   | (1.62% - 2.32%) | (1.35% - 1.93%) | (1.14% - 1.62%) | (0.60% - 0.97%) | (0.00% - 0.06%) | (0.00% - 0.05%) | (0.01% - 0.07%) | (0.00% - 0.02%) |
| Tawi-Tawi                        | 10.65%            | 11.21%            | 11.76%            | 9.80%             | 2.72%           | 2.94%           | 3.21%           | 2.32%           | 0.14%           | 0.22%           | 0.38%           | 0.17%           |
|                                  | (9.85% - 11.55%)  | (10.35% - 12.13%) | (10.95% - 12.65%) | (8.99% - 10.62%)  | (2.31% - 3.19%) | (2.54% - 3.41%) | (2.83% - 3.65%) | (1.95% - 2.70%) | (0.04% - 0.30%) | (0.12% - 0.36%) | (0.28% - 0.50%) | (0.09% - 0.26%) |
| Basilan                          | 11.13%            | 10.41%            | 9.87%             | 8.39%             | 2.86%           | 2.50%           | 2.26%           | 1.67%           | 0.17%           | 0.12%           | 0.16%           | 0.06%           |
|                                  | (10.32% - 12.02%) | (9.60% - 11.24%)  | (9.17% - 10.62%)  | (7.72% - 9.07%)   | (2.44% - 3.36%) | (2.10% - 2.89%) | (1.95% - 2.62%) | (1.39% - 1.96%) | (0.06% - 0.34%) | (0.05% - 0.21%) | (0.10% - 0.24%) | (0.02% - 0.12%) |
| Sulu                             | 12.33%            | 12.50%            | 13.26%            | 11.29%            | 3.59%           | 3.63%           | 4.04%           | 3.06%           | 0.44%           | 0.46%           | 0.65%           | 0.34%           |
|                                  | (11.45% - 13.21%) | (11.57% - 13.45%) | (12.40% - 14.21%) | (10.42% - 12.21%) | (3.12% - 4.10%) | (3.13% - 4.18%) | (3.55% - 4.55%) | (2.63% - 3.53%) | (0.25% - 0.65%) | (0.29% - 0.67%) | (0.48% - 0.85%) | (0.23% - 0.47%) |
| Maguindanao                      | 12.63%            | 12.35%            | 12.41%            | 10.50%            | 3.71%           | 3.52%           | 3.56%           | 2.66%           | 0.47%           | 0.41%           | 0.48%           | 0.24%           |
|                                  | (11.71% - 13.58%) | (11.45% - 13.30%) | (11.56% - 13.37%) | (9.69% - 11.38%)  | (3.20% - 4.25%) | (3.04% - 4.05%) | (3.14% - 4.04%) | (2.28% - 3.07%) | (0.27% - 0.69%) | (0.25% - 0.61%) | (0.35% - 0.63%) | (0.15% - 0.34%) |
| Lanao Del Sur                    | 11.95%            | 11.70%            | 11.82%            | 10.69%            | 3.35%           | 3.19%           | 3.25%           | 2.72%           | 0.34%           | 0.30%           | 0.39%           | 0.25%           |
|                                  | (11.12% - 12.82%) | (10.90% - 12.59%) | (11.02% - 12.66%) | (9.83% - 11.54%)  | (2.93% - 3.84%) | (2.79% - 3.67%) | (2.86% - 3.68%) | (2.32% - 3.13%) | (0.19% - 0.53%) | (0.17% - 0.47%) | (0.29% - 0.52%) | (0.16% - 0.36%) |
| National Capital Region          | 5.46%             | 5.65%             | 6.24%             | 5.23%             | 0.81%           | 0.87%           | 1.10%           | 0.75%           | 0.00%           | 0.00%           | 0.02%           | 0.00%           |
|                                  | (5.04% - 5.92%)   | (5.20% - 6.09%)   | (5.78% - 6.73%)   | (4.79% - 5.65%)   | (0.65% - 0.99%) | (0.70% - 1.04%) | (0.92% - 1.29%) | (0.59% - 0.91%) | (0.00% - 0.00%) | (0.00% - 0.00%) | (0.00% - 0.04%) | (0.00% - 0.01%) |
| Sri Lanka                        | 17.31%            | 18.12%            | 15.18%            | 13.35%            | 4.75%           | 5.10%           | 3.71%           | 2.96%           | 0.58%           | 0.68%           | 0.26%           | 0.07%           |
|                                  | (16.73% - 17.94%) | (17.43% - 18.80%) | (14.69% - 15.66%) | (12.72% - 13.98%) | (4.37% - 5.16%) | (4.64% - 5.58%) | (3.44% - 4.00%) | (2.65% - 3.30%) | (0.44% - 0.74%) | (0.50% - 0.88%) | (0.16% - 0.37%) | (0.01% - 0.17%) |
| Thailand                         | 7.26%             | 6.24%             | 5.94%             | 5.34%             | 1.09%           | 0.88%           | 0.85%           | 0.64%           | 0.00%           | 0.00%           | 0.00%           | 0.00%           |
|                                  | (6.80% - 7.74%)   | (5.84% - 6.63%)   | (5.57% - 6.32%)   | (4.98% - 5.73%)   | (0.92% - 1.27%) | (0.73% - 1.03%) | (0.72% - 0.99%) | (0.51% - 0.77%) | (0.00% - 0.00%) | (0.00% - 0.00%) | (0.00% - 0.01%) | (0.00% - 0.00%) |
| Mauritius                        | 14.01%            | 12.01%            | 9.31%             | 8.07%             | 4.18%           | 3.23%           | 2.02%           | 1.53%           | 0.62%           | 0.29%           | 0.02%           | 0.00%           |
|                                  | (13.53% - 14.53%) | (11.34% - 12.76%) | (8.48% - 10.14%)  | (7.39% - 8.80%)   | (3.91% - 4.48%) | (2.87% - 3.64%) | (1.67% - 2.42%) | (1.25% - 1.85%) | (0.52% - 0.75%) | (0.16% - 0.44%) | (0.00% - 0.08%) | (0.00% - 0.01%) |
| Seychelles                       | 3.09%             | 3.56%             | 4.21%             | 3.77%             | 0.00%           | 0.01%           | 0.09%           | 0.04%           | 0.00%           | 0.00%           | 0.00%           | 0.00%           |
|                                  | (2.79% - 3.46%)   | (3.14% - 4.01%)   | (3.72% - 4.76%)   | (3.37% - 4.30%)   | (0.00% - 0.01%) | (0.00% - 0.05%) | (0.03% - 0.20%) | (0.01% - 0.13%) | (0.00% - 0.00%) | (0.00% - 0.00%) | (0.00% - 0.00%) | (0.00% - 0.00%) |
| Timor-Leste                      | 24.15%            | 21.72%            | 20.50%            | 19.69%            | 8.91%           | 7.25%           | 6.44%           | 6.09%           | 2.30%           | 1.55%           | 1.19%           | 1.08%           |
|                                  | (23.04% - 25.27%) | (20.80% - 22.68%) | (19.67% - 21.34%) | (18.68% - 20.72%) | (8.02% - 9.85%) | (6.54% - 8.00%) | (5.83% - 7.03%) | (5.38% - 6.81%) | (1.87% - 2.75%) | (1.25% - 1.89%) | (0.95% - 1.46%) | (0.81% - 1.38%) |
| Viet Nam                         | 11.37%            | 10.59%            | 7.58%             | 5.49%             | 2.82%           | 2.43%           | 1.27%           | 0.56%           | 0.13%           | 0.03%           | 0.00%           | 0.00%           |
|                                  | (10.99% - 11.76%) | (10.31% - 10.86%) | (7.31% - 7.88%)   | (5.14% - 5.84%)   | (2.63% - 3.02%) | (2.30% - 2.58%) | (1.16% - 1.40%) | (0.45% - 0.68%) | (0.08% - 0.19%) | (0.01% - 0.06%) | (0.00% - 0.00%) | (0.00% - 0.00%) |
| Sub-Saharan Africa               | 11.78%            | 12.46%            | 10.40%            | 7.93%             | 3.30%           | 3.77%           | 2.81%           | 1.65%           | 0.54%           | 0.77%           | 0.49%           | 0.17%           |
|                                  | (11.65% - 11.92%) | (12.31% - 12.60%) | (10.28% - 10.51%) | (7.80% - 8.05%)   | (3.22% - 3.38%) | (3.68% - 3.87%) | (2.74% - 2.88%) | (1.60% - 1.71%) | (0.51% - 0.58%) | (0.73% - 0.81%) | (0.46% - 0.52%) | (0.15% - 0.19%) |
| Central Sub-Saharan Africa       | 12.50%            | 14.16%            | 10.55%            | 7.25%             | 3.28%           | 4.43%           | 2.68%           | 1.29%           | 0.29%           | 0.81%           | 0.27%           | 0.03%           |
|                                  | (12.03% - 13.02%) | (13.71% - 14.64%) | (10.15% - 10.96%) | (6.91% - 7.61%)   | (3.03% - 3.55%) | (4.16% - 4.74%) | (2.48% - 2.89%) | (1.15% - 1.45%) | (0.21% - 0.39%) | (0.70% - 0.94%) | (0.21% - 0.35%) | (0.01% - 0.05%) |
| Angola                           | 14.20%            | 11.15%            | 7.41%             | 5.07%             | 3.33%           | 2.39%           | 1.16%           | 0.47%           | 0.19%           | 0.10%           | 0.00%           | 0.00%           |
|                                  | (13.37% - 15.04%) | (10.57% - 11.75%) | (6.97% - 7.89%)   | (4.67% - 5.45%)   | (2.92% - 3.77%) | (2.13% - 2.67%) | (1.00% - 1.35%) | (0.36% - 0.59%) | (0.10% - 0.31%) | (0.06% - 0.16%) | (0.00% - 0.01%) | (0.00% - 0.00%) |
| Central African Republic         | 9.80%             | 11.20%            | 10.42%            | 9.36%             | 2.46%           | 3.21%           | 2.67%           | 2.15%           | 0.15%           | 0.36%           | 0.20%           | 0.09%           |
|                                  | (9.24% - 10.43%)  | (10.59% - 11.80%) | (9.87% - 10.98%)  | (8.79% - 9.99%)   | (2.19% - 2.77%) | (2.89% - 3.53%) | (2.40% - 2.96%) | (1.89% - 2.45%) | (0.08% - 0.24%) | (0.26% - 0.47%) | (0.14% - 0.28%) | (0.04% - 0.15%) |
| Congo                            | 6.88%             | 8.45%             | 7.02%             | 5.58%             | 1.02%           | 1.74%           | 1.24%           | 0.73%           | 0.00%           | 0.06%           | 0.02%           | 0.00%           |
|                                  | (6.49% - 7.30%)   | (8.01% - 8.94%)   | (6.68% - 7.40%)   | (5.21% - 5.99%)   | (0.87% - 1.17%) | (1.55% - 1.96%) | (1.11% - 1.39%) | (0.62% - 0.87%) | (0.00% - 0.00%) | (0.03% - 0.09%) | (0.00% - 0.03%) | (0.00% - 0.00%) |
| Democratic Republic of the Congo | 12.70%            | 15.88%            | 12.10%            | 8.16%             | 3.50%           | 5.41%           | 3.39%           | 1.62%           | 0.34%           | 1.13%           | 0.40%           | 0.04%           |
|                                  | (12.10% - 13.39%) | (15.27% - 16.53%) | (11.52% - 12.68%) | (7.69% - 8.71%)   | (3.17% - 3.88%) | (5.02% - 5.82%) | (3.08% - 3.70%) | (1.42% - 1.86%) | (0.23% - 0.49%) | (0.96% - 1.31%) | (0.30% - 0.51%) | (0.01% - 0.06%) |
| Equatorial Guinea                | 11.82%            | 8.29%             | 3.74%             | 2.68%             | 3.49%           | 1.94%           | 0.28%           | 0.06%           | 0.47%           | 0.13%           | 0.00%           | 0.00%           |
|                                  | (11.03% - 12.65%) | (7.78% - 8.84%)   | (3.32% - 4.13%)   | (2.42% - 2.99%)   | (3.06% - 3.95%) | (1.71% - 2.18%) | (0.18% - 0.40%) | (0.03% - 0.13%) | (0.32% - 0.65%) | (0.09% - 0.18%) | (0.00% - 0.00%) | (0.00% - 0.00%) |



Table S8b. Estimated overall, severe, and extreme wasting prevalence (%) in children under 5 years, both sexes, in 1990, 2000, 2010, and 2020.

| Location                   | Total                       |                             |                             |                             | Severe                   |                             |                            |                          | Extreme                  |                          |                          |                          |
|----------------------------|-----------------------------|-----------------------------|-----------------------------|-----------------------------|--------------------------|-----------------------------|----------------------------|--------------------------|--------------------------|--------------------------|--------------------------|--------------------------|
|                            | 1990                        | 2000                        | 2010                        | 2020                        | 1990                     | 2000                        | 2010                       | 2020                     | 1990                     | 2000                     | 2010                     | 2020                     |
| Gabon                      | 5.15%<br>(4.71% - 5.59%)    | 4.39%<br>(4.07% - 4.73%)    | 3.61%<br>(3.30% - 3.96%)    | 2.65%<br>(2.41% - 2.91%)    | 0.65%<br>(0.54% - 0.79%) | 0.47%<br>(0.39% - 0.55%)    | 0.21%<br>(0.16% - 0.28%)   | 0.07%<br>(0.05% - 0.10%) | 0.01%<br>(0.00% - 0.04%) | 0.00%<br>(0.00% - 0.02%) | 0.00%<br>(0.00% - 0.00%) | 0.00%<br>(0.00% - 0.00%) |
| Eastern Sub-Saharan Africa | 10.90%<br>(10.76% - 11.05%) | 10.66%<br>(10.52% - 10.79%) | 8.78%<br>(8.66% - 8.89%)    | 6.92%<br>(6.81% - 7.04%)    | 2.90%<br>(2.82% - 2.98%) | 2.78%<br>(2.71% - 2.85%)    | 2.04%<br>(1.99% - 2.10%)   | 1.33%<br>(1.28% - 1.39%) | 0.45%<br>(0.42% - 0.48%) | 0.42%<br>(0.39% - 0.44%) | 0.28%<br>(0.26% - 0.30%) | 0.13%<br>(0.12% - 0.15%) |
| Burundi                    | 10.42%<br>(9.91% - 10.94%)  | 9.44%<br>(8.97% - 9.93%)    | 6.90%<br>(6.53% - 7.30%)    | 5.45%<br>(5.09% - 5.80%)    | 2.58%<br>(2.34% - 2.84%) | 2.16%<br>(1.95% - 2.39%)    | 1.10%<br>(0.95% - 1.24%)   | 0.54%<br>(0.43% - 0.66%) | 0.11%<br>(0.06% - 0.18%) | 0.05%<br>(0.02% - 0.09%) | 0.00%<br>(0.00% - 0.01%) | 0.00%<br>(0.00% - 0.00%) |
| Comoros                    | 13.25%<br>(12.34% - 14.22%) | 13.33%<br>(12.55% - 14.07%) | 10.71%<br>(10.08% - 11.42%) | 9.01%<br>(8.42% - 9.66%)    | 4.39%<br>(3.88% - 4.98%) | 4.55%<br>(4.09% - 5.02%)    | 3.07%<br>(2.73% - 3.45%)   | 2.26%<br>(1.97% - 2.58%) | 0.82%<br>(0.60% - 1.07%) | 0.91%<br>(0.72% - 1.12%) | 0.36%<br>(0.27% - 0.47%) | 0.18%<br>(0.12% - 0.25%) |
| Djibouti                   | 20.90%<br>(19.76% - 22.08%) | 24.09%<br>(23.04% - 25.18%) | 22.94%<br>(22.04% - 23.92%) | 18.45%<br>(17.39% - 19.54%) | 8.96%<br>(8.10% - 9.91%) | 11.41%<br>(10.47% - 12.37%) | 10.09%<br>(9.33% - 10.91%) | 6.75%<br>(6.03% - 7.52%) | 2.93%<br>(2.46% - 3.46%) | 4.33%<br>(3.77% - 4.94%) | 3.43%<br>(3.01% - 3.90%) | 1.68%<br>(1.36% - 2.03%) |
| Eritrea                    | 18.94%<br>(17.97% - 19.87%) | 16.23%<br>(15.44% - 16.99%) | 15.06%<br>(14.25% - 15.86%) | 11.75%<br>(10.97% - 12.52%) | 6.53%<br>(5.91% - 7.15%) | 4.82%<br>(4.38% - 5.28%)    | 4.33%<br>(3.90% - 4.78%)   | 2.72%<br>(2.37% - 3.10%) | 1.46%<br>(1.19% - 1.74%) | 0.80%<br>(0.65% - 0.99%) | 0.69%<br>(0.56% - 0.85%) | 0.24%<br>(0.16% - 0.35%) |
| Ethiopia                   | 16.20%<br>(15.80% - 16.59%) | 14.83%<br>(14.47% - 15.22%) | 12.13%<br>(11.80% - 12.45%) | 9.40%<br>(9.13% - 9.68%)    | 4.80%<br>(4.58% - 5.02%) | 4.11%<br>(3.93% - 4.31%)    | 2.91%<br>(2.75% - 3.06%)   | 1.83%<br>(1.72% - 1.95%) | 0.84%<br>(0.77% - 0.93%) | 0.63%<br>(0.57% - 0.69%) | 0.29%<br>(0.25% - 0.33%) | 0.09%<br>(0.07% - 0.12%) |
| Kenya                      | 7.22%<br>(7.03% - 7.41%)    | 6.69%<br>(6.52% - 6.87%)    | 5.25%<br>(5.11% - 5.40%)    | 3.89%<br>(3.78% - 4.00%)    | 1.45%<br>(1.37% - 1.53%) | 1.25%<br>(1.18% - 1.32%)    | 0.82%<br>(0.77% - 0.87%)   | 0.46%<br>(0.43% - 0.49%) | 0.14%<br>(0.12% - 0.15%) | 0.11%<br>(0.10% - 0.13%) | 0.06%<br>(0.06% - 0.07%) | 0.02%<br>(0.02% - 0.03%) |
| Baringo                    | 11.30%<br>(10.36% - 12.26%) | 10.84%<br>(9.92% - 11.78%)  | 7.36%<br>(6.68% - 8.10%)    | 4.83%<br>(4.32% - 5.40%)    | 2.82%<br>(2.34% - 3.30%) | 2.54%<br>(2.09% - 3.06%)    | 1.27%<br>(1.00% - 1.60%)   | 0.50%<br>(0.34% - 0.70%) | 0.33%<br>(0.20% - 0.51%) | 0.28%<br>(0.14% - 0.46%) | 0.05%<br>(0.01% - 0.11%) | 0.00%<br>(0.00% - 0.01%) |
| Bomet                      | 5.16%<br>(4.65% - 5.69%)    | 4.31%<br>(3.88% - 4.77%)    | 2.56%<br>(2.32% - 2.85%)    | 1.59%<br>(1.42% - 1.78%)    | 0.69%<br>(0.52% - 0.90%) | 0.43%<br>(0.30% - 0.57%)    | 0.13%<br>(0.09% - 0.19%)   | 0.03%<br>(0.01% - 0.06%) | 0.00%<br>(0.00% - 0.03%) | 0.00%<br>(0.00% - 0.00%) | 0.00%<br>(0.00% - 0.00%) | 0.00%<br>(0.00% - 0.00%) |
| Bungoma                    | 6.67%<br>(6.08% - 7.29%)    | 6.49%<br>(5.96% - 7.01%)    | 5.99%<br>(5.48% - 6.53%)    | 4.33%<br>(3.91% - 4.71%)    | 1.01%<br>(0.79% - 1.24%) | 0.96%<br>(0.77% - 1.16%)    | 0.80%<br>(0.62% - 1.00%)   | 0.31%<br>(0.20% - 0.43%) | 0.00%<br>(0.00% - 0.02%) | 0.00%<br>(0.00% - 0.00%) | 0.00%<br>(0.00% - 0.00%) | 0.00%<br>(0.00% - 0.00%) |
| Busia                      | 8.59%<br>(7.76% - 9.47%)    | 7.96%<br>(7.25% - 8.73%)    | 5.71%<br>(5.16% - 6.32%)    | 3.65%<br>(3.29% - 4.06%)    | 1.79%<br>(1.40% - 2.22%) | 1.53%<br>(1.21% - 1.91%)    | 0.78%<br>(0.57% - 1.04%)   | 0.23%<br>(0.13% - 0.36%) | 0.06%<br>(0.00% - 0.18%) | 0.02%<br>(0.00% - 0.11%) | 0.00%<br>(0.00% - 0.00%) | 0.00%<br>(0.00% - 0.00%) |
| Elgeyo-Marakwet            | 8.73%<br>(7.97% - 9.59%)    | 7.11%<br>(6.46% - 7.79%)    | 5.26%<br>(4.72% - 5.85%)    | 3.56%<br>(3.17% - 3.97%)    | 1.79%<br>(1.46% - 2.21%) | 1.05%<br>(1.00% - 1.54%)    | 0.82%<br>(0.63% - 1.08%)   | 0.37%<br>(0.26% - 0.52%) | 0.09%<br>(0.02% - 0.21%) | 0.03%<br>(0.00% - 0.07%) | 0.03%<br>(0.01% - 0.07%) | 0.00%<br>(0.00% - 0.01%) |
| Embu                       | 3.85%<br>(3.44% - 4.27%)    | 3.46%<br>(3.09% - 3.85%)    | 2.62%<br>(2.35% - 2.90%)    | 1.66%<br>(1.49% - 1.87%)    | 0.21%<br>(0.12% - 0.33%) | 0.14%<br>(0.08% - 0.22%)    | 0.08%<br>(0.05% - 0.11%)   | 0.01%<br>(0.00% - 0.02%) | 0.00%<br>(0.00% - 0.00%) | 0.00%<br>(0.00% - 0.00%) | 0.00%<br>(0.00% - 0.00%) | 0.00%<br>(0.00% - 0.00%) |
| Garissa                    | 11.82%<br>(10.88% - 12.76%) | 11.14%<br>(10.20% - 12.04%) | 7.77%<br>(6.97% - 8.59%)    | 5.84%<br>(5.28% - 6.47%)    | 3.27%<br>(2.74% - 3.85%) | 2.97%<br>(2.47% - 3.53%)    | 1.76%<br>(1.40% - 2.15%)   | 1.01%<br>(0.79% - 1.27%) | 0.46%<br>(0.24% - 0.72%) | 0.38%<br>(0.19% - 0.64%) | 0.12%<br>(0.01% - 0.26%) | 0.00%<br>(0.00% - 0.02%) |
| HomaBay                    | 6.86%<br>(6.24% - 7.44%)    | 6.37%<br>(5.86% - 6.92%)    | 4.72%<br>(4.35% - 5.15%)    | 3.23%<br>(2.94% - 3.55%)    | 1.06%<br>(0.85% - 1.29%) | 1.05%<br>(0.85% - 1.26%)    | 0.66%<br>(0.53% - 0.80%)   | 0.24%<br>(0.17% - 0.32%) | 0.04%<br>(0.00% - 0.09%) | 0.04%<br>(0.00% - 0.10%) | 0.01%<br>(0.00% - 0.03%) | 0.00%<br>(0.00% - 0.00%) |
| Isiolo                     | 15.51%<br>(14.22% - 16.89%) | 14.11%<br>(12.95% - 15.28%) | 12.14%<br>(11.11% - 13.30%) | 7.45%<br>(6.71% - 8.19%)    | 4.14%<br>(3.48% - 4.92%) | 3.44%<br>(2.89% - 4.07%)    | 2.62%<br>(2.15% - 3.16%)   | 0.96%<br>(0.73% - 1.22%) | 0.55%<br>(0.34% - 0.81%) | 0.34%<br>(0.21% - 0.51%) | 0.13%<br>(0.06% - 0.22%) | 0.00%<br>(0.00% - 0.02%) |
| Kajiado                    | 8.48%<br>(7.63% - 9.29%)    | 7.28%<br>(6.55% - 8.12%)    | 3.83%<br>(3.34% - 4.26%)    | 2.12%<br>(1.89% - 2.36%)    | 1.49%<br>(1.15% - 1.87%) | 1.07%<br>(0.78% - 1.41%)    | 0.19%<br>(0.09% - 0.30%)   | 0.01%<br>(0.00% - 0.03%) | 0.03%<br>(0.00% - 0.14%) | 0.00%<br>(0.00% - 0.03%) | 0.00%<br>(0.00% - 0.00%) | 0.00%<br>(0.00% - 0.00%) |
| Kakamega                   | 10.52%<br>(9.86% - 11.25%)  | 10.21%<br>(9.47% - 10.89%)  | 6.63%<br>(6.11% - 7.19%)    | 4.70%<br>(4.33% - 5.10%)    | 2.85%<br>(2.51% - 3.22%) | 2.70%<br>(2.36% - 3.04%)    | 1.20%<br>(1.02% - 1.42%)   | 0.60%<br>(0.49% - 0.73%) | 0.35%<br>(0.25% - 0.46%) | 0.34%<br>(0.24% - 0.46%) | 0.05%<br>(0.02% - 0.10%) | 0.00%<br>(0.00% - 0.02%) |
| Kericho                    | 9.38%<br>(8.64% - 10.14%)   | 7.40%<br>(6.81% - 8.04%)    | 6.15%<br>(5.59% - 6.83%)    | 4.44%<br>(4.03% - 4.86%)    | 2.33%<br>(1.98% - 2.73%) | 1.57%<br>(1.34% - 1.86%)    | 1.23%<br>(1.00% - 1.47%)   | 0.68%<br>(0.53% - 0.85%) | 0.18%<br>(0.09% - 0.32%) | 0.09%<br>(0.03% - 0.16%) | 0.11%<br>(0.05% - 0.18%) | 0.02%<br>(0.00% - 0.06%) |
| Kiambu                     | 5.91%<br>(5.43% - 6.39%)    | 5.84%<br>(5.38% - 6.30%)    | 4.29%<br>(3.93% - 4.65%)    | 3.14%<br>(2.87% - 3.41%)    | 0.87%<br>(0.69% - 1.06%) | 0.86%<br>(0.70% - 1.04%)    | 0.43%<br>(0.32% - 0.55%)   | 0.15%<br>(0.10% - 0.21%) | 0.00%<br>(0.00% - 0.00%) | 0.00%<br>(0.00% - 0.01%) | 0.00%<br>(0.00% - 0.00%) | 0.00%<br>(0.00% - 0.00%) |
| Kilifi                     | 7.57%<br>(7.02% - 8.14%)    | 6.66%<br>(6.11% - 7.16%)    | 5.31%<br>(4.88% - 5.77%)    | 3.69%<br>(3.36% - 4.01%)    | 1.38%<br>(1.16% - 1.64%) | 1.08%<br>(0.88% - 1.27%)    | 0.71%<br>(0.57% - 0.86%)   | 0.28%<br>(0.21% - 0.37%) | 0.01%<br>(0.00% - 0.03%) | 0.00%<br>(0.00% - 0.01%) | 0.00%<br>(0.00% - 0.00%) | 0.00%<br>(0.00% - 0.00%) |
| Kirinyaga                  | 1.70%<br>(1.50% - 1.91%)    | 1.40%<br>(1.26% - 1.57%)    | 1.09%<br>(0.98% - 1.23%)    | 0.83%<br>(0.66% - 0.95%)    | 0.00%<br>(0.00% - 0.02%) | 0.00%<br>(0.00% - 0.00%)    | 0.00%<br>(0.00% - 0.00%)   | 0.00%<br>(0.00% - 0.00%) | 0.00%<br>(0.00% - 0.00%) | 0.00%<br>(0.00% - 0.00%) | 0.00%<br>(0.00% - 0.00%) | 0.00%<br>(0.00% - 0.00%) |

Table S8b. Estimated overall, severe, and extreme **wasting** prevalence (%) in children under 5 years, both sexes, in 1990, 2000, 2010, and 2020.

| Location  | Total              |                    |                    |                    | Severe           |                  |                  |                  | Extreme          |                  |                  |                  |
|-----------|--------------------|--------------------|--------------------|--------------------|------------------|------------------|------------------|------------------|------------------|------------------|------------------|------------------|
|           | 1990               | 2000               | 2010               | 2020               | 1990             | 2000             | 2010             | 2020             | 1990             | 2000             | 2010             | 2020             |
| Kisii     | 6.84%              | 5.38%              | 3.73%              | 2.56%              | 1.13%            | 0.60%            | 0.32%            | 0.13%            | 0.01%            | 0.00%            | 0.00%            | 0.00%            |
|           | ( 6.21% - 7.51%)   | ( 4.83% - 5.96%)   | ( 3.33% - 4.19%)   | ( 2.23% - 2.92%)   | ( 0.87% - 1.44%) | ( 0.42% - 0.82%) | ( 0.19% - 0.47%) | ( 0.04% - 0.23%) | ( 0.00% - 0.10%) | ( 0.00% - 0.00%) | ( 0.00% - 0.00%) | ( 0.00% - 0.00%) |
| Kisumu    | 5.21%              | 5.36%              | 2.79%              | 1.57%              | 0.77%            | 0.79%            | 0.09%            | 0.00%            | 0.01%            | 0.01%            | 0.00%            | 0.00%            |
|           | ( 4.67% - 5.75%)   | ( 4.82% - 5.93%)   | ( 2.49% - 3.14%)   | ( 1.38% - 1.79%)   | ( 0.57% - 0.98%) | ( 0.58% - 1.02%) | ( 0.04% - 0.15%) | ( 0.00% - 0.02%) | ( 0.00% - 0.05%) | ( 0.00% - 0.06%) | ( 0.00% - 0.00%) | ( 0.00% - 0.00%) |
| Kitui     | 7.40%              | 7.32%              | 5.09%              | 3.00%              | 1.16%            | 1.11%            | 0.56%            | 0.13%            | 0.00%            | 0.00%            | 0.00%            | 0.00%            |
|           | ( 6.74% - 8.12%)   | ( 6.74% - 7.92%)   | ( 4.65% - 5.58%)   | ( 2.71% - 3.31%)   | ( 0.92% - 1.44%) | ( 0.90% - 1.35%) | ( 0.43% - 0.71%) | ( 0.08% - 0.19%) | ( 0.00% - 0.01%) | ( 0.00% - 0.01%) | ( 0.00% - 0.00%) | ( 0.00% - 0.00%) |
| Kwale     | 4.81%              | 4.55%              | 3.22%              | 1.94%              | 0.43%            | 0.38%            | 0.15%            | 0.01%            | 0.00%            | 0.00%            | 0.00%            | 0.00%            |
|           | ( 4.36% - 5.29%)   | ( 4.10% - 5.02%)   | ( 2.87% - 3.57%)   | ( 1.70% - 2.19%)   | ( 0.31% - 0.59%) | ( 0.26% - 0.54%) | ( 0.08% - 0.25%) | ( 0.00% - 0.04%) | ( 0.00% - 0.00%) | ( 0.00% - 0.00%) | ( 0.00% - 0.00%) | ( 0.00% - 0.00%) |
| Laikipia  | 6.14%              | 5.65%              | 3.82%              | 2.47%              | 0.92%            | 0.75%            | 0.20%            | 0.02%            | 0.00%            | 0.00%            | 0.00%            | 0.00%            |
|           | ( 5.59% - 6.75%)   | ( 5.09% - 6.23%)   | ( 3.43% - 4.24%)   | ( 2.20% - 2.80%)   | ( 0.72% - 1.16%) | ( 0.56% - 0.96%) | ( 0.11% - 0.33%) | ( 0.00% - 0.05%) | ( 0.00% - 0.01%) | ( 0.00% - 0.00%) | ( 0.00% - 0.00%) | ( 0.00% - 0.00%) |
| Lamu      | 10.26%             | 9.33%              | 5.05%              | 3.19%              | 3.41%            | 2.91%            | 0.69%            | 0.17%            | 0.97%            | 0.73%            | 0.00%            | 0.00%            |
|           | ( 9.31% - 11.29%)  | ( 8.44% - 10.27%)  | ( 4.45% - 5.69%)   | ( 2.81% - 3.61%)   | ( 2.82% - 4.04%) | ( 2.38% - 3.52%) | ( 0.48% - 0.94%) | ( 0.08% - 0.29%) | ( 0.69% - 1.28%) | ( 0.50% - 1.02%) | ( 0.00% - 0.02%) | ( 0.00% - 0.00%) |
| Machakos  | 5.54%              | 5.56%              | 4.71%              | 3.23%              | 0.86%            | 0.87%            | 0.67%            | 0.27%            | 0.02%            | 0.02%            | 0.00%            | 0.00%            |
|           | ( 5.07% - 6.06%)   | ( 5.09% - 6.07%)   | ( 4.29% - 5.15%)   | ( 2.91% - 3.56%)   | ( 0.68% - 1.06%) | ( 0.70% - 1.07%) | ( 0.53% - 0.83%) | ( 0.19% - 0.36%) | ( 0.00% - 0.06%) | ( 0.00% - 0.06%) | ( 0.00% - 0.01%) | ( 0.00% - 0.00%) |
| Makueni   | 5.26%              | 4.81%              | 3.09%              | 1.67%              | 0.62%            | 0.49%            | 0.15%            | 0.01%            | 0.00%            | 0.00%            | 0.00%            | 0.00%            |
|           | ( 4.72% - 5.82%)   | ( 4.37% - 5.30%)   | ( 2.75% - 3.44%)   | ( 1.49% - 1.88%)   | ( 0.44% - 0.82%) | ( 0.34% - 0.64%) | ( 0.09% - 0.23%) | ( 0.00% - 0.02%) | ( 0.00% - 0.00%) | ( 0.00% - 0.00%) | ( 0.00% - 0.00%) | ( 0.00% - 0.00%) |
| Mandera   | 10.58%             | 10.09%             | 9.07%              | 7.96%              | 2.50%            | 2.32%            | 1.93%            | 1.52%            | 0.58%            | 0.54%            | 0.39%            | 0.28%            |
|           | ( 9.81% - 11.45%)  | ( 9.32% - 10.94%)  | ( 8.37% - 9.83%)   | ( 7.27% - 8.71%)   | ( 2.16% - 2.85%) | ( 2.00% - 2.67%) | ( 1.68% - 2.22%) | ( 1.26% - 1.79%) | ( 0.43% - 0.75%) | ( 0.41% - 0.70%) | ( 0.29% - 0.51%) | ( 0.19% - 0.39%) |
| Marsabit  | 17.52%             | 16.28%             | 16.03%             | 12.18%             | 6.11%            | 5.43%            | 5.23%            | 2.99%            | 1.40%            | 1.12%            | 1.04%            | 0.22%            |
|           | ( 16.26% - 18.80%) | ( 15.13% - 17.52%) | ( 15.00% - 17.15%) | ( 11.42% - 12.99%) | ( 5.26% - 7.01%) | ( 4.72% - 6.22%) | ( 4.57% - 5.92%) | ( 2.59% - 3.44%) | ( 1.01% - 1.84%) | ( 0.81% - 1.49%) | ( 0.74% - 1.33%) | ( 0.12% - 0.35%) |
| Meru      | 8.25%              | 6.10%              | 3.62%              | 1.74%              | 1.82%            | 1.05%            | 0.18%            | 0.00%            | 0.16%            | 0.03%            | 0.00%            | 0.00%            |
|           | ( 7.58% - 8.96%)   | ( 5.56% - 6.69%)   | ( 3.17% - 4.01%)   | ( 1.55% - 1.99%)   | ( 1.50% - 2.18%) | ( 0.84% - 1.28%) | ( 0.10% - 0.27%) | ( 0.00% - 0.00%) | ( 0.07% - 0.28%) | ( 0.00% - 0.08%) | ( 0.00% - 0.00%) | ( 0.00% - 0.00%) |
| Migori    | 15.51%             | 13.23%             | 10.77%             | 7.07%              | 5.74%            | 4.40%            | 3.00%            | 1.38%            | 1.53%            | 0.98%            | 0.47%            | 0.11%            |
|           | ( 14.58% - 16.52%) | ( 12.39% - 14.12%) | ( 10.05% - 11.52%) | ( 6.61% - 7.60%)   | ( 5.12% - 6.42%) | ( 3.88% - 4.94%) | ( 2.64% - 3.39%) | ( 1.18% - 1.60%) | ( 1.24% - 1.88%) | ( 0.75% - 1.24%) | ( 0.35% - 0.59%) | ( 0.06% - 0.17%) |
| Mombasa   | 6.78%              | 6.32%              | 3.99%              | 2.66%              | 1.34%            | 1.15%            | 0.36%            | 0.13%            | 0.13%            | 0.09%            | 0.00%            | 0.00%            |
|           | ( 6.21% - 7.36%)   | ( 5.76% - 6.85%)   | ( 3.58% - 4.41%)   | ( 2.38% - 2.96%)   | ( 1.11% - 1.59%) | ( 0.93% - 1.38%) | ( 0.27% - 0.47%) | ( 0.08% - 0.18%) | ( 0.07% - 0.20%) | ( 0.04% - 0.15%) | ( 0.00% - 0.01%) | ( 0.00% - 0.00%) |
| Murang'a  | 6.32%              | 5.27%              | 3.77%              | 2.58%              | 1.03%            | 0.65%            | 0.24%            | 0.05%            | 0.00%            | 0.00%            | 0.00%            | 0.00%            |
|           | ( 5.83% - 6.86%)   | ( 4.79% - 5.77%)   | ( 3.39% - 4.20%)   | ( 2.30% - 2.90%)   | ( 0.84% - 1.24%) | ( 0.48% - 0.83%) | ( 0.16% - 0.36%) | ( 0.01% - 0.08%) | ( 0.00% - 0.01%) | ( 0.00% - 0.00%) | ( 0.00% - 0.00%) | ( 0.00% - 0.00%) |
| Nairobi   | 3.12%              | 3.11%              | 2.40%              | 1.86%              | 0.11%            | 0.12%            | 0.05%            | 0.01%            | 0.00%            | 0.00%            | 0.00%            | 0.00%            |
|           | ( 2.87% - 3.39%)   | ( 2.86% - 3.37%)   | ( 2.21% - 2.59%)   | ( 1.72% - 2.02%)   | ( 0.07% - 0.17%) | ( 0.07% - 0.18%) | ( 0.02% - 0.07%) | ( 0.00% - 0.03%) | ( 0.00% - 0.00%) | ( 0.00% - 0.00%) | ( 0.00% - 0.00%) | ( 0.00% - 0.00%) |
| Nakuru    | 3.36%              | 3.27%              | 4.12%              | 3.30%              | 0.21%            | 0.24%            | 0.56%            | 0.36%            | 0.00%            | 0.00%            | 0.00%            | 0.00%            |
|           | ( 3.05% - 3.69%)   | ( 2.99% - 3.59%)   | ( 3.77% - 4.51%)   | ( 3.03% - 3.63%)   | ( 0.14% - 0.28%) | ( 0.18% - 0.32%) | ( 0.45% - 0.69%) | ( 0.28% - 0.45%) | ( 0.00% - 0.00%) | ( 0.00% - 0.00%) | ( 0.00% - 0.01%) | ( 0.00% - 0.00%) |
| Nandi     | 8.08%              | 7.15%              | 5.85%              | 3.48%              | 1.65%            | 1.33%            | 0.88%            | 0.26%            | 0.04%            | 0.02%            | 0.02%            | 0.00%            |
|           | ( 7.43% - 8.81%)   | ( 6.54% - 7.79%)   | ( 5.29% - 6.44%)   | ( 3.12% - 3.87%)   | ( 1.38% - 1.97%) | ( 1.10% - 1.59%) | ( 0.70% - 1.10%) | ( 0.19% - 0.35%) | ( 0.00% - 0.09%) | ( 0.00% - 0.07%) | ( 0.00% - 0.06%) | ( 0.00% - 0.00%) |
| Narok     | 9.23%              | 8.43%              | 5.06%              | 3.01%              | 1.92%            | 1.63%            | 0.47%            | 0.10%            | 0.07%            | 0.03%            | 0.00%            | 0.00%            |
|           | ( 8.48% - 10.08%)  | ( 7.76% - 9.22%)   | ( 4.55% - 5.58%)   | ( 2.70% - 3.34%)   | ( 1.59% - 2.31%) | ( 1.34% - 1.99%) | ( 0.33% - 0.63%) | ( 0.06% - 0.15%) | ( 0.01% - 0.16%) | ( 0.00% - 0.09%) | ( 0.00% - 0.00%) | ( 0.00% - 0.00%) |
| Nyamira   | 10.19%             | 9.76%              | 9.21%              | 6.67%              | 3.68%            | 3.31%            | 2.72%            | 1.43%            | 1.13%            | 0.94%            | 0.57%            | 0.08%            |
|           | ( 9.25% - 11.16%)  | ( 8.87% - 10.75%)  | ( 8.30% - 10.33%)  | ( 5.86% - 7.54%)   | ( 3.03% - 4.43%) | ( 2.71% - 3.99%) | ( 2.18% - 3.42%) | ( 1.04% - 1.89%) | ( 0.80% - 1.55%) | ( 0.64% - 1.29%) | ( 0.32% - 0.91%) | ( 0.00% - 0.25%) |
| Nyandarua | 5.07%              | 5.31%              | 3.26%              | 2.13%              | 0.53%            | 0.62%            | 0.24%            | 0.11%            | 0.00%            | 0.00%            | 0.00%            | 0.00%            |
|           | ( 4.59% - 5.59%)   | ( 4.79% - 5.91%)   | ( 2.94% - 3.57%)   | ( 1.90% - 2.36%)   | ( 0.39% - 0.69%) | ( 0.46% - 0.82%) | ( 0.17% - 0.32%) | ( 0.06% - 0.16%) | ( 0.00% - 0.00%) | ( 0.00% - 0.00%) | ( 0.00% - 0.00%) | ( 0.00% - 0.00%) |
| Nyeri     | 5.59%              | 4.65%              | 4.28%              | 3.55%              | 0.79%            | 0.54%            | 0.43%            | 0.25%            | 0.00%            | 0.00%            | 0.00%            | 0.00%            |
|           | ( 5.08% - 6.17%)   | ( 4.17% - 5.15%)   | ( 3.85% - 4.76%)   | ( 3.17% - 3.94%)   | ( 0.61% - 0.99%) | ( 0.40% - 0.71%) | ( 0.31% - 0.58%) | ( 0.16% - 0.37%) | ( 0.00% - 0.01%) | ( 0.00% - 0.00%) | ( 0.00% - 0.00%) | ( 0.00% - 0.00%) |
| Samburu   | 14.40%             | 12.95%             | 12.53%             | 10.67%             | 3.47%            | 2.82%            | 2.53%            | 1.77%            | 0.37%            | 0.25%            | 0.13%            | 0.02%            |
|           | ( 13.22% - 15.54%) | ( 11.87% - 14.08%) | ( 11.45% - 13.60%) | ( 9.79% - 11.65%)  | ( 2.89% - 4.07%) | ( 2.31% - 3.35%) | ( 2.04% - 3.08%) | ( 1.41% - 2.17%) | ( 0.22% - 0.57%) | ( 0.13% - 0.41%) | ( 0.03% - 0.29%) | ( 0.00% - 0.06%) |
| Siaya     | 5.76%              | 4.64%              | 2.15%              | 1.10%              | 0.74%            | 0.40%            | 0.01%            | 0.00%            | 0.00%            | 0.00%            | 0.00%            | 0.00%            |
|           | ( 5.22% - 6.34%)   | ( 4.17% - 5.16%)   | ( 1.89% - 2.45%)   | ( 0.91% - 1.32%)   | ( 0.56% - 0.94%) | ( 0.26% - 0.56%) | ( 0.00% - 0.04%) | ( 0.00% - 0.00%) | ( 0.00% - 0.02%) | ( 0.00% - 0.00%) | ( 0.00% - 0.00%) | ( 0.00% - 0.00%) |

Table S8b. Estimated overall, severe, and extreme **wasting prevalence (%)** in children under 5 years, both sexes, in 1990, 2000, 2010, and 2020.

| Location                    | Total              |                    |                    |                    | Severe            |                   |                    |                  | Extreme          |                  |                  |                  |
|-----------------------------|--------------------|--------------------|--------------------|--------------------|-------------------|-------------------|--------------------|------------------|------------------|------------------|------------------|------------------|
|                             | 1990               | 2000               | 2010               | 2020               | 1990              | 2000              | 2010               | 2020             | 1990             | 2000             | 2010             | 2020             |
| TaitaTaveta                 | 9.30%              | 8.03%              | 7.25%              | 5.46%              | 2.18%             | 1.70%             | 1.46%              | 0.78%            | 0.13%            | 0.07%            | 0.02%            | 0.00%            |
|                             | ( 8.53% - 10.14%)  | ( 7.31% - 8.81%)   | ( 6.58% - 7.97%)   | ( 4.90% - 6.10%)   | ( 1.82% - 2.58%)  | ( 1.40% - 2.05%)  | ( 1.16% - 1.78%)   | ( 0.58% - 1.03%) | ( 0.05% - 0.23%) | ( 0.02% - 0.14%) | ( 0.00% - 0.06%) | ( 0.00% - 0.01%) |
| TanaRiver                   | 7.20%              | 7.97%              | 7.17%              | 7.22%              | 1.26%             | 1.48%             | 1.29%              | 1.26%            | 0.15%            | 0.20%            | 0.13%            | 0.06%            |
|                             | ( 6.55% - 7.86%)   | ( 7.31% - 8.65%)   | ( 6.57% - 7.84%)   | ( 6.59% - 7.86%)   | ( 1.03% - 1.52%)  | ( 1.23% - 1.76%)  | ( 1.07% - 1.55%)   | ( 1.04% - 1.50%) | ( 0.08% - 0.23%) | ( 0.12% - 0.29%) | ( 0.07% - 0.21%) | ( 0.02% - 0.11%) |
| TharakaNithi                | 9.41%              | 9.48%              | 6.87%              | 3.88%              | 2.70%             | 2.74%             | 1.52%              | 0.52%            | 0.64%            | 0.68%            | 0.23%            | 0.01%            |
|                             | ( 8.68% - 10.20%)  | ( 8.76% - 10.19%)  | ( 6.27% - 7.45%)   | ( 3.52% - 4.25%)   | ( 2.29% - 3.14%)  | ( 2.37% - 3.13%)  | ( 1.29% - 1.78%)   | ( 0.41% - 0.64%) | ( 0.46% - 0.85%) | ( 0.51% - 0.88%) | ( 0.14% - 0.34%) | ( 0.00% - 0.03%) |
| TransNzoia                  | 5.41%              | 4.62%              | 3.33%              | 2.15%              | 0.79%             | 0.61%             | 0.36%              | 0.15%            | 0.02%            | 0.01%            | 0.00%            | 0.00%            |
|                             | ( 4.94% - 5.94%)   | ( 4.21% - 5.03%)   | ( 3.02% - 3.68%)   | ( 1.94% - 2.38%)   | ( 0.61% - 0.99%)  | ( 0.47% - 0.77%)  | ( 0.27% - 0.48%)   | ( 0.09% - 0.22%) | ( 0.00% - 0.06%) | ( 0.00% - 0.04%) | ( 0.00% - 0.02%) | ( 0.00% - 0.00%) |
| Turkana                     | 9.75%              | 8.40%              | 6.72%              | 5.12%              | 2.23%             | 1.69%             | 1.05%              | 0.55%            | 0.11%            | 0.04%            | 0.00%            | 0.00%            |
|                             | ( 9.01% - 10.54%)  | ( 7.70% - 9.15%)   | ( 6.11% - 7.33%)   | ( 4.65% - 5.62%)   | ( 1.90% - 2.61%)  | ( 1.39% - 2.01%)  | ( 0.84% - 1.29%)   | ( 0.42% - 0.71%) | ( 0.04% - 0.20%) | ( 0.00% - 0.09%) | ( 0.00% - 0.02%) | ( 0.00% - 0.00%) |
| UasinGishu                  | 7.92%              | 7.86%              | 4.95%              | 2.93%              | 1.59%             | 1.62%             | 0.57%              | 0.13%            | 0.02%            | 0.02%            | 0.00%            | 0.00%            |
|                             | ( 7.27% - 8.57%)   | ( 7.18% - 8.61%)   | ( 4.46% - 5.46%)   | ( 2.62% - 3.34%)   | ( 1.30% - 1.89%)  | ( 1.34% - 1.96%)  | ( 0.42% - 0.74%)   | ( 0.08% - 0.20%) | ( 0.00% - 0.07%) | ( 0.00% - 0.06%) | ( 0.00% - 0.00%) | ( 0.00% - 0.00%) |
| Vihiga                      | 4.19%              | 3.89%              | 2.84%              | 2.12%              | 0.35%             | 0.35%             | 0.19%              | 0.10%            | 0.00%            | 0.00%            | 0.00%            | 0.00%            |
|                             | ( 3.69% - 4.64%)   | ( 3.45% - 4.37%)   | ( 2.55% - 3.16%)   | ( 1.88% - 2.39%)   | ( 0.24% - 0.48%)  | ( 0.24% - 0.46%)  | ( 0.12% - 0.27%)   | ( 0.05% - 0.15%) | ( 0.00% - 0.00%) | ( 0.00% - 0.01%) | ( 0.00% - 0.00%) | ( 0.00% - 0.00%) |
| Wajir                       | 13.46%             | 13.38%             | 10.92%             | 10.01%             | 4.46%             | 4.43%             | 3.07%              | 2.51%            | 0.88%            | 0.87%            | 0.37%            | 0.25%            |
|                             | ( 12.57% - 14.39%) | ( 12.54% - 14.29%) | ( 10.16% - 11.63%) | ( 9.38% - 10.70%)  | ( 3.96% - 5.03%)  | ( 3.93% - 4.96%)  | ( 2.68% - 3.46%)   | ( 2.22% - 2.85%) | ( 0.66% - 1.14%) | ( 0.65% - 1.10%) | ( 0.26% - 0.51%) | ( 0.17% - 0.36%) |
| WestPokot                   | 11.39%             | 10.70%             | 10.91%             | 8.60%              | 2.60%             | 2.31%             | 2.51%              | 1.51%            | 0.21%            | 0.20%            | 0.17%            | 0.02%            |
|                             | ( 10.56% - 12.31%) | ( 9.85% - 11.57%)  | ( 10.05% - 11.78%) | ( 7.85% - 9.42%)   | ( 2.21% - 3.05%)  | ( 1.91% - 2.73%)  | ( 2.08% - 2.97%)   | ( 1.21% - 1.87%) | ( 0.12% - 0.33%) | ( 0.11% - 0.32%) | ( 0.08% - 0.30%) | ( 0.00% - 0.06%) |
| Madagascar                  | 8.74%              | 12.66%             | 12.68%             | 10.21%             | 1.61%             | 3.38%             | 3.35%              | 2.18%            | 0.02%            | 0.37%            | 0.38%            | 0.12%            |
|                             | ( 8.28% - 9.25%)   | ( 12.08% - 13.25%) | ( 12.01% - 13.36%) | ( 9.56% - 10.86%)  | ( 1.43% - 1.83%)  | ( 3.07% - 3.70%)  | ( 3.00% - 3.71%)   | ( 1.89% - 2.49%) | ( 0.00% - 0.04%) | ( 0.27% - 0.48%) | ( 0.27% - 0.51%) | ( 0.06% - 0.18%) |
| Malawi                      | 6.68%              | 7.48%              | 5.20%              | 3.96%              | 1.13%             | 1.51%             | 0.65%              | 0.29%            | 0.01%            | 0.05%            | 0.00%            | 0.00%            |
|                             | ( 6.34% - 7.05%)   | ( 7.15% - 7.82%)   | ( 4.92% - 5.47%)   | ( 3.72% - 4.27%)   | ( 0.99% - 1.27%)  | ( 1.37% - 1.64%)  | ( 0.56% - 0.74%)   | ( 0.23% - 0.36%) | ( 0.00% - 0.03%) | ( 0.03% - 0.08%) | ( 0.00% - 0.00%) | ( 0.00% - 0.00%) |
| Mozambique                  | 9.88%              | 7.85%              | 5.50%              | 4.01%              | 2.38%             | 1.57%             | 0.76%              | 0.34%            | 0.13%            | 0.03%            | 0.00%            | 0.00%            |
|                             | ( 9.32% - 10.46%)  | ( 7.43% - 8.27%)   | ( 5.17% - 5.85%)   | ( 3.69% - 4.33%)   | ( 2.11% - 2.66%)  | ( 1.39% - 1.74%)  | ( 0.65% - 0.88%)   | ( 0.28% - 0.43%) | ( 0.08% - 0.19%) | ( 0.01% - 0.06%) | ( 0.00% - 0.01%) | ( 0.00% - 0.00%) |
| Rwanda                      | 6.91%              | 7.82%              | 3.77%              | 2.47%              | 1.29%             | 1.07%             | 0.34%              | 0.09%            | 0.08%            | 0.14%            | 0.00%            | 0.00%            |
|                             | ( 6.54% - 7.29%)   | ( 7.43% - 8.19%)   | ( 3.56% - 4.00%)   | ( 2.31% - 2.64%)   | ( 1.15% - 1.45%)  | ( 1.51% - 1.84%)  | ( 0.30% - 0.39%)   | ( 0.06% - 0.12%) | ( 0.05% - 0.12%) | ( 0.10% - 0.18%) | ( 0.00% - 0.00%) | ( 0.00% - 0.00%) |
| Somalia                     | 18.07%             | 17.29%             | 14.60%             | 13.61%             | 6.45%             | 6.08%             | 4.49%              | 3.94%            | 1.54%            | 1.39%            | 0.72%            | 0.51%            |
|                             | ( 17.25% - 18.89%) | ( 16.73% - 17.87%) | ( 13.90% - 15.30%) | ( 12.82% - 14.42%) | ( 5.88% - 7.04%)  | ( 5.69% - 6.49%)  | ( 4.09% - 4.91%)   | ( 3.51% - 4.41%) | ( 1.27% - 1.82%) | ( 1.22% - 1.59%) | ( 0.56% - 0.90%) | ( 0.35% - 0.69%) |
| United Republic of Tanzania | 7.97%              | 6.76%              | 4.95%              | 3.69%              | 1.64%             | 1.15%             | 0.55%              | 0.26%            | 0.04%            | 0.01%            | 0.00%            | 0.00%            |
|                             | ( 7.63% - 8.32%)   | ( 6.43% - 7.08%)   | ( 4.68% - 5.22%)   | ( 3.46% - 3.96%)   | ( 1.50% - 1.79%)  | ( 1.03% - 1.28%)  | ( 0.48% - 0.63%)   | ( 0.21% - 0.30%) | ( 0.02% - 0.06%) | ( 0.00% - 0.02%) | ( 0.00% - 0.00%) | ( 0.00% - 0.00%) |
| Uganda                      | 4.73%              | 6.26%              | 5.34%              | 3.89%              | 0.55%             | 1.07%             | 0.81%              | 0.42%            | 0.00%            | 0.06%            | 0.03%            | 0.00%            |
|                             | ( 4.48% - 4.98%)   | ( 5.96% - 6.53%)   | ( 5.11% - 5.59%)   | ( 3.67% - 4.11%)   | ( 0.48% - 0.62%)  | ( 0.97% - 1.18%)  | ( 0.74% - 0.89%)   | ( 0.36% - 0.49%) | ( 0.00% - 0.00%) | ( 0.03% - 0.08%) | ( 0.01% - 0.04%) | ( 0.00% - 0.00%) |
| Zambia                      | 6.38%              | 7.21%              | 6.55%              | 4.29%              | 1.08%             | 1.42%             | 1.16%              | 0.41%            | 0.00%            | 0.04%            | 0.01%            | 0.00%            |
|                             | ( 6.06% - 6.71%)   | ( 6.92% - 7.53%)   | ( 6.22% - 6.85%)   | ( 3.98% - 4.59%)   | ( 0.95% - 1.21%)  | ( 1.31% - 1.56%)  | ( 1.03% - 1.29%)   | ( 0.32% - 0.50%) | ( 0.00% - 0.02%) | ( 0.02% - 0.07%) | ( 0.00% - 0.02%) | ( 0.00% - 0.00%) |
| South Sudan                 | 22.90%             | 23.91%             | 24.24%             | 21.19%             | 9.80%             | 10.65%            | 10.60%             | 8.21%            | 3.15%            | 3.62%            | 3.49%            | 2.23%            |
|                             | ( 21.76% - 24.14%) | ( 23.06% - 24.82%) | ( 23.64% - 24.83%) | ( 20.13% - 22.38%) | ( 8.87% - 10.82%) | ( 9.89% - 11.45%) | ( 10.06% - 11.16%) | ( 7.37% - 9.21%) | ( 2.62% - 3.73%) | ( 3.18% - 4.11%) | ( 3.15% - 3.82%) | ( 1.82% - 2.77%) |
| Southern Sub-Saharan Africa | 5.91%              | 5.91%              | 4.73%              | 3.46%              | 0.99%             | 0.94%             | 0.56%              | 0.28%            | 0.07%            | 0.04%            | 0.01%            | 0.00%            |
|                             | ( 5.77% - 6.04%)   | ( 5.79% - 6.04%)   | ( 4.61% - 4.85%)   | ( 3.36% - 3.55%)   | ( 0.94% - 1.04%)  | ( 0.89% - 0.99%)  | ( 0.53% - 0.59%)   | ( 0.26% - 0.30%) | ( 0.06% - 0.08%) | ( 0.04% - 0.05%) | ( 0.01% - 0.02%) | ( 0.00% - 0.00%) |
| Botswana                    | 8.50%              | 7.50%              | 6.71%              | 5.32%              | 1.93%             | 1.57%             | 1.29%              | 0.76%            | 0.14%            | 0.11%            | 0.07%            | 0.02%            |
|                             | ( 7.91% - 9.13%)   | ( 7.04% - 7.95%)   | ( 6.25% - 7.14%)   | ( 4.92% - 5.74%)   | ( 1.67% - 2.21%)  | ( 1.38% - 1.77%)  | ( 1.11% - 1.47%)   | ( 0.63% - 0.91%) | ( 0.09% - 0.19%) | ( 0.08% - 0.14%) | ( 0.05% - 0.11%) | ( 0.00% - 0.04%) |
| Lesotho                     | 8.91%              | 7.36%              | 4.69%              | 3.07%              | 1.85%             | 1.43%             | 0.49%              | 0.13%            | 0.21%            | 0.11%            | 0.00%            | 0.00%            |
|                             | ( 8.48% - 9.35%)   | ( 7.03% - 7.68%)   | ( 4.43% - 4.96%)   | ( 2.87% - 3.29%)   | ( 1.68% - 2.04%)  | ( 1.30% - 1.55%)  | ( 0.41% - 0.57%)   | ( 0.10% - 0.17%) | ( 0.17% - 0.24%) | ( 0.08% - 0.13%) | ( 0.00% - 0.00%) | ( 0.00% - 0.00%) |
| Namibia                     | 10.41%             | 9.75%              | 8.37%              | 6.21%              | 2.56%             | 2.16%             | 1.64%              | 0.87%            | 0.15%            | 0.11%            | 0.05%            | 0.00%            |
|                             | ( 9.82% - 11.01%)  | ( 9.23% - 10.30%)  | ( 7.94% - 8.84%)   | ( 5.77% - 6.67%)   | ( 2.29% - 2.86%)  | ( 1.93% - 2.39%)  | ( 1.45% - 1.83%)   | ( 0.73% - 1.04%) | ( 0.08% - 0.22%) | ( 0.07% - 0.16%) | ( 0.02% - 0.08%) | ( 0.00% - 0.02%) |
| South Africa                | 6.22%              | 5.73%              | 4.36%              | 3.27%              | 1.09%             | 0.87%             | 0.46%              | 0.25%            | 0.08%            | 0.05%            | 0.01%            | 0.00%            |
|                             | ( 6.05% - 6.39%)   | ( 5.58% - 5.89%)   | ( 4.23% - 4.50%)   | ( 3.16% - 3.37%)   | ( 1.03% - 1.17%)  | ( 0.82% - 0.93%)  | ( 0.42% - 0.49%)   | ( 0.22% - 0.28%) | ( 0.06% - 0.10%) | ( 0.04% - 0.07%) | ( 0.01% - 0.02%) | ( 0.00% - 0.01%) |

Table S8b. Estimated overall, severe, and extreme wasting prevalence (%) in children under 5 years, both sexes, in 1990, 2000, 2010, and 2020.

| Location                          | Total                       |                             |                             |                             | Severe                   |                          |                          |                          | Extreme                  |                          |                          |                          |
|-----------------------------------|-----------------------------|-----------------------------|-----------------------------|-----------------------------|--------------------------|--------------------------|--------------------------|--------------------------|--------------------------|--------------------------|--------------------------|--------------------------|
|                                   | 1990                        | 2000                        | 2010                        | 2020                        | 1990                     | 2000                     | 2010                     | 2020                     | 1990                     | 2000                     | 2010                     | 2020                     |
| Eswatini                          | 2.31%<br>(2.13% - 2.49%)    | 2.22%<br>(2.06% - 2.38%)    | 1.90%<br>(1.75% - 2.04%)    | 1.53%<br>(1.40% - 1.73%)    | 0.02%<br>(0.01% - 0.05%) | 0.02%<br>(0.00% - 0.04%) | 0.01%<br>(0.00% - 0.03%) | 0.00%<br>(0.00% - 0.01%) | 0.00%<br>(0.00% - 0.00%) | 0.00%<br>(0.00% - 0.00%) | 0.00%<br>(0.00% - 0.00%) | 0.00%<br>(0.00% - 0.00%) |
| Zimbabwe                          | 4.07%<br>(3.77% - 4.39%)    | 5.77%<br>(5.48% - 6.07%)    | 5.13%<br>(4.85% - 5.43%)    | 3.49%<br>(3.27% - 3.73%)    | 0.34%<br>(0.28% - 0.41%) | 0.89%<br>(0.79% - 1.00%) | 0.25%<br>(0.57% - 0.74%) | 0.25%<br>(0.20% - 0.30%) | 0.00%<br>(0.00% - 0.00%) | 0.00%<br>(0.00% - 0.02%) | 0.00%<br>(0.00% - 0.00%) | 0.00%<br>(0.00% - 0.00%) |
| <b>Western Sub-Saharan Africa</b> | 13.66%<br>(13.40% - 13.92%) | 14.79%<br>(14.52% - 15.06%) | 12.52%<br>(12.34% - 12.72%) | 9.41%<br>(9.19% - 9.62%)    | 4.19%<br>(4.03% - 4.37%) | 5.02%<br>(4.82% - 5.22%) | 3.82%<br>(3.69% - 3.95%) | 2.16%<br>(2.06% - 2.28%) | 0.81%<br>(0.75% - 0.89%) | 1.22%<br>(1.13% - 1.32%) | 0.80%<br>(0.74% - 0.86%) | 0.25%<br>(0.22% - 0.29%) |
| Benin                             | 10.92%<br>(10.39% - 11.45%) | 11.23%<br>(10.74% - 11.73%) | 9.73%<br>(9.27% - 10.22%)   | 7.07%<br>(6.67% - 7.50%)    | 2.85%<br>(2.59% - 3.13%) | 3.04%<br>(2.80% - 3.29%) | 2.41%<br>(2.19% - 2.65%) | 1.22%<br>(1.06% - 1.39%) | 0.27%<br>(0.20% - 0.34%) | 0.38%<br>(0.31% - 0.45%) | 0.16%<br>(0.11% - 0.22%) | 0.01%<br>(0.00% - 0.03%) |
| Burkina Faso                      | 18.95%<br>(18.18% - 19.70%) | 21.44%<br>(20.78% - 22.12%) | 17.00%<br>(16.39% - 17.65%) | 12.24%<br>(11.61% - 12.90%) | 6.46%<br>(5.94% - 6.96%) | 8.46%<br>(7.98% - 8.94%) | 5.44%<br>(5.05% - 5.86%) | 2.87%<br>(2.54% - 3.18%) | 1.39%<br>(1.16% - 1.63%) | 2.41%<br>(2.16% - 2.65%) | 0.98%<br>(0.82% - 1.15%) | 0.11%<br>(0.04% - 0.21%) |
| Cameroon                          | 6.44%<br>(6.07% - 6.84%)    | 7.60%<br>(7.20% - 8.01%)    | 6.27%<br>(5.95% - 6.60%)    | 4.64%<br>(4.29% - 4.95%)    | 1.09%<br>(0.96% - 1.25%) | 1.64%<br>(1.47% - 1.81%) | 1.10%<br>(0.98% - 1.23%) | 0.52%<br>(0.44% - 0.62%) | 0.02%<br>(0.00% - 0.04%) | 0.12%<br>(0.08% - 0.17%) | 0.02%<br>(0.01% - 0.05%) | 0.00%<br>(0.00% - 0.00%) |
| Cabo Verde                        | 5.43%<br>(5.43% - 6.05%)    | 4.37%<br>(3.91% - 4.87%)    | 2.59%<br>(2.35% - 2.87%)    | 1.91%<br>(1.72% - 2.10%)    | 0.51%<br>(0.41% - 0.61%) | 0.18%<br>(0.11% - 0.28%) | 0.02%<br>(0.00% - 0.04%) | 0.00%<br>(0.00% - 0.01%) | 0.00%<br>(0.00% - 0.00%) | 0.00%<br>(0.00% - 0.00%) | 0.00%<br>(0.00% - 0.00%) | 0.00%<br>(0.00% - 0.00%) |
| Chad                              | 17.81%<br>(17.04% - 18.58%) | 17.93%<br>(17.25% - 18.56%) | 17.12%<br>(16.46% - 17.82%) | 14.32%<br>(13.63% - 15.04%) | 5.93%<br>(5.46% - 6.46%) | 5.95%<br>(5.51% - 6.37%) | 5.34%<br>(4.95% - 5.78%) | 3.75%<br>(3.39% - 4.16%) | 1.20%<br>(0.98% - 1.44%) | 1.20%<br>(1.01% - 1.39%) | 0.93%<br>(0.77% - 1.10%) | 0.38%<br>(0.26% - 0.51%) |
| Côte d'Ivoire                     | 9.64%<br>(9.20% - 10.10%)   | 9.23%<br>(8.81% - 9.68%)    | 8.32%<br>(7.91% - 8.73%)    | 5.77%<br>(5.43% - 6.18%)    | 2.10%<br>(1.90% - 2.32%) | 1.99%<br>(1.80% - 2.19%) | 1.67%<br>(1.51% - 1.84%) | 0.69%<br>(0.58% - 0.82%) | 0.10%<br>(0.06% - 0.14%) | 0.11%<br>(0.08% - 0.16%) | 0.12%<br>(0.08% - 0.16%) | 0.00%<br>(0.00% - 0.00%) |
| Gambia                            | 11.64%<br>(10.95% - 12.36%) | 10.74%<br>(10.15% - 11.37%) | 9.89%<br>(9.43% - 10.39%)   | 7.76%<br>(7.28% - 8.28%)    | 2.65%<br>(2.35% - 2.98%) | 2.28%<br>(2.02% - 2.55%) | 1.80%<br>(1.61% - 2.00%) | 1.07%<br>(0.92% - 1.24%) | 0.23%<br>(0.15% - 0.31%) | 0.15%<br>(0.10% - 0.22%) | 0.07%<br>(0.03% - 0.10%) | 0.00%<br>(0.00% - 0.02%) |
| Ghana                             | 9.98%<br>(9.54% - 10.49%)   | 10.60%<br>(10.19% - 11.11%) | 9.26%<br>(8.85% - 9.77%)    | 6.19%<br>(5.82% - 6.57%)    | 2.23%<br>(2.03% - 2.47%) | 2.52%<br>(2.32% - 2.75%) | 1.93%<br>(1.75% - 2.13%) | 0.79%<br>(0.67% - 0.92%) | 0.13%<br>(0.08% - 0.18%) | 0.21%<br>(0.16% - 0.26%) | 0.07%<br>(0.04% - 0.11%) | 0.00%<br>(0.00% - 0.01%) |
| Guinea                            | 12.35%<br>(11.66% - 13.12%) | 11.68%<br>(11.16% - 12.23%) | 10.11%<br>(9.67% - 10.60%)  | 8.42%<br>(7.93% - 8.91%)    | 3.56%<br>(3.20% - 3.98%) | 3.25%<br>(2.98% - 3.53%) | 2.44%<br>(2.23% - 2.67%) | 1.68%<br>(1.47% - 1.89%) | 0.50%<br>(0.39% - 0.63%) | 0.41%<br>(0.34% - 0.50%) | 0.19%<br>(0.14% - 0.25%) | 0.02%<br>(0.00% - 0.06%) |
| Guinea-Bissau                     | 12.23%<br>(11.47% - 13.03%) | 11.76%<br>(11.22% - 12.38%) | 7.86%<br>(7.43% - 8.30%)    | 6.11%<br>(5.67% - 6.59%)    | 3.45%<br>(3.07% - 3.86%) | 3.30%<br>(3.02% - 3.62%) | 1.52%<br>(1.35% - 1.71%) | 0.82%<br>(0.67% - 0.99%) | 0.45%<br>(0.35% - 0.57%) | 0.42%<br>(0.35% - 0.50%) | 0.02%<br>(0.00% - 0.04%) | 0.00%<br>(0.00% - 0.00%) |
| Liberia                           | 8.55%<br>(7.99% - 9.16%)    | 8.41%<br>(7.93% - 8.97%)    | 6.11%<br>(5.73% - 6.50%)    | 4.64%<br>(4.28% - 5.01%)    | 1.66%<br>(1.42% - 1.93%) | 1.60%<br>(1.40% - 1.84%) | 0.83%<br>(0.70% - 0.97%) | 0.40%<br>(0.31% - 0.49%) | 0.02%<br>(0.00% - 0.05%) | 0.01%<br>(0.00% - 0.04%) | 0.00%<br>(0.00% - 0.01%) | 0.00%<br>(0.00% - 0.00%) |
| Mali                              | 17.86%<br>(17.17% - 18.55%) | 17.01%<br>(16.41% - 17.64%) | 12.16%<br>(11.63% - 12.64%) | 9.07%<br>(8.61% - 9.63%)    | 6.17%<br>(5.75% - 6.63%) | 5.72%<br>(5.34% - 6.11%) | 2.87%<br>(2.61% - 3.10%) | 1.47%<br>(1.30% - 1.69%) | 1.37%<br>(1.17% - 1.58%) | 1.20%<br>(1.05% - 1.37%) | 0.25%<br>(0.19% - 0.31%) | 0.00%<br>(0.00% - 0.02%) |
| Mauritania                        | 18.06%<br>(17.40% - 18.71%) | 15.93%<br>(15.33% - 16.57%) | 13.69%<br>(13.27% - 14.12%) | 9.93%<br>(9.40% - 10.44%)   | 6.14%<br>(5.68% - 6.59%) | 4.79%<br>(4.43% - 5.20%) | 3.87%<br>(3.64% - 4.12%) | 2.16%<br>(1.93% - 2.39%) | 1.28%<br>(1.07% - 1.50%) | 0.73%<br>(0.59% - 0.90%) | 0.46%<br>(0.38% - 0.55%) | 0.04%<br>(0.01% - 0.07%) |
| Niger                             | 21.01%<br>(20.30% - 21.71%) | 20.08%<br>(19.41% - 20.70%) | 17.07%<br>(16.54% - 17.61%) | 13.95%<br>(13.26% - 14.62%) | 7.04%<br>(6.57% - 7.53%) | 6.71%<br>(6.28% - 7.12%) | 4.99%<br>(4.69% - 5.32%) | 3.24%<br>(2.91% - 3.58%) | 1.52%<br>(1.32% - 1.76%) | 1.45%<br>(1.26% - 1.65%) | 0.75%<br>(0.63% - 0.89%) | 0.24%<br>(0.17% - 0.32%) |
| Nigeria                           | 14.52%<br>(13.98% - 15.14%) | 16.41%<br>(15.85% - 16.99%) | 13.93%<br>(13.55% - 14.33%) | 10.26%<br>(9.80% - 10.70%)  | 4.80%<br>(4.47% - 5.21%) | 6.22%<br>(5.82% - 6.65%) | 4.92%<br>(4.66% - 5.19%) | 2.78%<br>(2.56% - 3.02%) | 1.09%<br>(0.95% - 1.26%) | 1.80%<br>(1.60% - 2.02%) | 1.32%<br>(1.20% - 1.45%) | 0.47%<br>(0.40% - 0.55%) |
| Sao Tome and Principe             | 7.06%<br>(6.56% - 7.59%)    | 6.89%<br>(6.43% - 7.36%)    | 7.21%<br>(6.76% - 7.66%)    | 4.34%<br>(4.00% - 4.69%)    | 1.18%<br>(0.98% - 1.38%) | 1.19%<br>(1.02% - 1.38%) | 1.34%<br>(1.17% - 1.53%) | 0.40%<br>(0.31% - 0.49%) | 0.00%<br>(0.00% - 0.01%) | 0.00%<br>(0.00% - 0.01%) | 0.00%<br>(0.00% - 0.02%) | 0.00%<br>(0.00% - 0.00%) |
| Senegal                           | 10.38%<br>(9.89% - 10.89%)  | 10.54%<br>(10.06% - 11.03%) | 8.69%<br>(8.32% - 9.06%)    | 6.38%<br>(6.00% - 6.78%)    | 2.21%<br>(2.00% - 2.43%) | 2.13%<br>(1.93% - 2.34%) | 1.27%<br>(1.13% - 1.41%) | 0.57%<br>(0.46% - 0.70%) | 0.14%<br>(0.09% - 0.18%) | 0.13%<br>(0.09% - 0.16%) | 0.01%<br>(0.00% - 0.02%) | 0.00%<br>(0.00% - 0.00%) |
| Sierra Leone                      | 11.29%<br>(10.72% - 11.83%) | 13.03%<br>(12.49% - 13.57%) | 10.48%<br>(10.06% - 10.93%) | 6.58%<br>(6.23% - 6.94%)    | 3.04%<br>(2.75% - 3.34%) | 3.95%<br>(3.64% - 4.26%) | 2.78%<br>(2.57% - 3.01%) | 1.13%<br>(0.99% - 1.28%) | 0.23%<br>(0.13% - 0.33%) | 0.58%<br>(0.47% - 0.70%) | 0.27%<br>(0.22% - 0.32%) | 0.02%<br>(0.00% - 0.04%) |

Table S8c. Estimated overall, severe, and extreme **underweight** prevalence (%) in children under 5 years, both sexes, in 1990, 2000, 2010, and 2020.

| Location                                                | Total                       |                             |                             |                             | Severe                   |                          |                          |                          | Extreme                  |                          |                          |                          |
|---------------------------------------------------------|-----------------------------|-----------------------------|-----------------------------|-----------------------------|--------------------------|--------------------------|--------------------------|--------------------------|--------------------------|--------------------------|--------------------------|--------------------------|
|                                                         | 1990                        | 2000                        | 2010                        | 2020                        | 1990                     | 2000                     | 2010                     | 2020                     | 1990                     | 2000                     | 2010                     | 2020                     |
| <b>Global</b>                                           | 20.63<br>(20.46% - 20.80%)  | 19.96<br>(19.87% - 20.05%)  | 17.51<br>(17.44% - 17.57%)  | 14.71%<br>(14.64% - 14.79%) | 7.98%<br>(7.84% - 8.10%) | 8.51%<br>(8.42% - 8.60%) | 7.06%<br>(6.98% - 7.13%) | 5.45%<br>(5.37% - 5.52%) | 2.19%<br>(2.09% - 2.31%) | 2.73%<br>(2.63% - 2.84%) | 2.08%<br>(2.01% - 2.16%) | 1.45%<br>(1.39% - 1.50%) |
| <b>Central Europe, Eastern Europe, and Central Asia</b> | 4.41%<br>(4.30% - 4.52%)    | 4.78%<br>(4.67% - 4.89%)    | 3.44%<br>(3.35% - 3.52%)    | 2.80%<br>(2.72% - 2.89%)    | 0.53%<br>(0.50% - 0.57%) | 0.67%<br>(0.63% - 0.71%) | 0.33%<br>(0.31% - 0.35%) | 0.21%<br>(0.19% - 0.23%) | 0.03%<br>(0.03% - 0.04%) | 0.05%<br>(0.04% - 0.05%) | 0.01%<br>(0.01% - 0.01%) | 0.00%<br>(0.00% - 0.01%) |
| <b>Central Asia</b>                                     | 8.46%<br>(8.22% - 8.72%)    | 8.62%<br>(8.39% - 8.86%)    | 5.82%<br>(5.66% - 6.00%)    | 4.21%<br>(4.07% - 4.35%)    | 1.63%<br>(1.50% - 1.75%) | 1.70%<br>(1.59% - 1.81%) | 0.82%<br>(0.76% - 0.89%) | 0.46%<br>(0.41% - 0.51%) | 0.12%<br>(0.09% - 0.14%) | 0.13%<br>(0.11% - 0.16%) | 0.03%<br>(0.02% - 0.04%) | 0.01%<br>(0.00% - 0.01%) |
| Armenia                                                 | 3.27%<br>(2.99% - 3.54%)    | 3.40%<br>(3.14% - 3.66%)    | 3.07%<br>(2.87% - 3.31%)    | 2.42%<br>(2.23% - 2.63%)    | 0.13%<br>(0.09% - 0.17%) | 0.17%<br>(0.13% - 0.22%) | 0.19%<br>(0.15% - 0.24%) | 0.11%<br>(0.08% - 0.14%) | 0.00%<br>(0.00% - 0.00%) | 0.00%<br>(0.00% - 0.00%) | 0.00%<br>(0.00% - 0.00%) | 0.00%<br>(0.00% - 0.00%) |
| Azerbaijan                                              | 11.78%<br>(11.09% - 12.41%) | 12.61%<br>(11.99% - 13.21%) | 7.32%<br>(6.88% - 7.74%)    | 6.11%<br>(5.67% - 6.57%)    | 2.75%<br>(2.40% - 3.10%) | 3.20%<br>(2.87% - 3.54%) | 1.18%<br>(1.02% - 1.35%) | 0.90%<br>(0.75% - 1.07%) | 0.24%<br>(0.16% - 0.32%) | 0.34%<br>(0.26% - 0.44%) | 0.01%<br>(0.00% - 0.02%) | 0.00%<br>(0.00% - 0.01%) |
| Georgia                                                 | 2.22%<br>(2.05% - 2.40%)    | 2.15%<br>(1.99% - 2.32%)    | 1.47%<br>(1.37% - 1.58%)    | 1.39%<br>(1.29% - 1.51%)    | 0.03%<br>(0.02% - 0.04%) | 0.03%<br>(0.02% - 0.04%) | 0.01%<br>(0.00% - 0.01%) | 0.01%<br>(0.00% - 0.01%) | 0.00%<br>(0.00% - 0.00%) | 0.00%<br>(0.00% - 0.00%) | 0.00%<br>(0.00% - 0.00%) | 0.00%<br>(0.00% - 0.00%) |
| Kazakhstan                                              | 4.38%<br>(4.07% - 4.72%)    | 4.20%<br>(3.90% - 4.53%)    | 3.58%<br>(3.34% - 3.83%)    | 2.40%<br>(2.21% - 2.60%)    | 0.31%<br>(0.25% - 0.39%) | 0.30%<br>(0.24% - 0.37%) | 0.27%<br>(0.22% - 0.33%) | 0.10%<br>(0.07% - 0.13%) | 0.00%<br>(0.00% - 0.00%) | 0.00%<br>(0.00% - 0.00%) | 0.00%<br>(0.00% - 0.01%) | 0.00%<br>(0.00% - 0.00%) |
| Kyrgyzstan                                              | 5.77%<br>(5.38% - 6.21%)    | 5.35%<br>(4.98% - 5.73%)    | 3.61%<br>(3.36% - 3.87%)    | 3.00%<br>(2.75% - 3.26%)    | 0.62%<br>(0.50% - 0.74%) | 0.52%<br>(0.42% - 0.62%) | 0.19%<br>(0.14% - 0.24%) | 0.12%<br>(0.08% - 0.18%) | 0.01%<br>(0.00% - 0.02%) | 0.00%<br>(0.00% - 0.01%) | 0.00%<br>(0.00% - 0.00%) | 0.00%<br>(0.00% - 0.00%) |
| Mongolia                                                | 8.21%<br>(7.67% - 8.81%)    | 8.62%<br>(8.19% - 9.07%)    | 3.84%<br>(3.59% - 4.09%)    | 2.22%<br>(2.01% - 2.43%)    | 1.00%<br>(0.81% - 1.23%) | 1.29%<br>(1.11% - 1.48%) | 0.25%<br>(0.19% - 0.31%) | 0.03%<br>(0.01% - 0.07%) | 0.00%<br>(0.00% - 0.01%) | 0.01%<br>(0.00% - 0.02%) | 0.00%<br>(0.00% - 0.00%) | 0.00%<br>(0.00% - 0.00%) |
| Tajikistan                                              | 16.21%<br>(15.41% - 17.00%) | 16.90%<br>(16.21% - 17.61%) | 13.46%<br>(12.81% - 14.09%) | 10.29%<br>(9.63% - 10.94%)  | 4.37%<br>(3.87% - 4.94%) | 4.70%<br>(4.20% - 5.26%) | 3.03%<br>(2.68% - 3.40%) | 1.94%<br>(1.64% - 2.26%) | 0.54%<br>(0.39% - 0.73%) | 0.63%<br>(0.48% - 0.81%) | 0.24%<br>(0.16% - 0.34%) | 0.07%<br>(0.03% - 0.13%) |
| Turkmenistan                                            | 10.58%<br>(9.93% - 11.25%)  | 10.29%<br>(9.87% - 10.67%)  | 6.78%<br>(6.45% - 7.11%)    | 4.36%<br>(4.06% - 4.65%)    | 1.99%<br>(1.71% - 2.30%) | 2.01%<br>(1.82% - 2.20%) | 0.96%<br>(0.85% - 1.08%) | 0.41%<br>(0.34% - 0.49%) | 0.09%<br>(0.05% - 0.13%) | 0.09%<br>(0.06% - 0.12%) | 0.01%<br>(0.00% - 0.02%) | 0.00%<br>(0.00% - 0.00%) |
| Uzbekistan                                              | 9.34%<br>(8.76% - 9.92%)    | 8.16%<br>(7.68% - 8.69%)    | 5.24%<br>(4.90% - 5.60%)    | 3.64%<br>(3.38% - 3.93%)    | 1.89%<br>(1.63% - 2.16%) | 1.45%<br>(1.26% - 1.66%) | 0.61%<br>(0.51% - 0.72%) | 0.28%<br>(0.22% - 0.35%) | 0.10%<br>(0.06% - 0.16%) | 0.05%<br>(0.03% - 0.08%) | 0.00%<br>(0.00% - 0.01%) | 0.00%<br>(0.00% - 0.00%) |
| <b>Central Europe</b>                                   | 2.70%<br>(2.61% - 2.78%)    | 2.59%<br>(2.51% - 2.67%)    | 1.96%<br>(1.90% - 2.03%)    | 1.71%<br>(1.65% - 1.77%)    | 0.16%<br>(0.14% - 0.18%) | 0.18%<br>(0.17% - 0.20%) | 0.06%<br>(0.06% - 0.07%) | 0.04%<br>(0.03% - 0.04%) | 0.01%<br>(0.00% - 0.01%) | 0.01%<br>(0.01% - 0.02%) | 0.00%<br>(0.00% - 0.00%) | 0.00%<br>(0.00% - 0.00%) |
| Albania                                                 | 11.76%<br>(11.08% - 12.47%) | 11.25%<br>(10.65% - 11.80%) | 5.99%<br>(5.60% - 6.37%)    | 3.67%<br>(3.41% - 3.94%)    | 2.44%<br>(2.07% - 2.81%) | 2.66%<br>(2.34% - 2.97%) | 0.90%<br>(0.77% - 1.04%) | 0.31%<br>(0.25% - 0.38%) | 0.14%<br>(0.07% - 0.23%) | 0.24%<br>(0.15% - 0.33%) | 0.02%<br>(0.00% - 0.03%) | 0.00%<br>(0.00% - 0.00%) |
| Bosnia and Herzegovina                                  | 3.64%<br>(3.37% - 3.93%)    | 2.83%<br>(2.62% - 3.04%)    | 1.88%<br>(1.75% - 2.04%)    | 1.76%<br>(1.63% - 1.92%)    | 0.21%<br>(0.16% - 0.27%) | 0.16%<br>(0.12% - 0.20%) | 0.05%<br>(0.04% - 0.07%) | 0.04%<br>(0.03% - 0.05%) | 0.00%<br>(0.00% - 0.01%) | 0.00%<br>(0.00% - 0.01%) | 0.00%<br>(0.00% - 0.00%) | 0.00%<br>(0.00% - 0.00%) |
| Bulgaria                                                | 1.98%<br>(1.80% - 2.23%)    | 2.82%<br>(2.49% - 3.11%)    | 2.40%<br>(2.13% - 2.64%)    | 2.10%<br>(1.85% - 2.38%)    | 0.01%<br>(0.01% - 0.03%) | 0.10%<br>(0.06% - 0.14%) | 0.07%<br>(0.04% - 0.11%) | 0.05%<br>(0.03% - 0.08%) | 0.00%<br>(0.00% - 0.00%) | 0.00%<br>(0.00% - 0.00%) | 0.00%<br>(0.00% - 0.00%) | 0.00%<br>(0.00% - 0.00%) |
| Croatia                                                 | 2.44%<br>(2.23% - 2.65%)    | 2.67%<br>(2.45% - 2.90%)    | 2.05%<br>(1.87% - 2.23%)    | 1.90%<br>(1.74% - 2.08%)    | 0.05%<br>(0.02% - 0.07%) | 0.11%<br>(0.07% - 0.15%) | 0.05%<br>(0.03% - 0.08%) | 0.04%<br>(0.02% - 0.06%) | 0.00%<br>(0.00% - 0.00%) | 0.00%<br>(0.00% - 0.00%) | 0.00%<br>(0.00% - 0.00%) | 0.00%<br>(0.00% - 0.00%) |
| Czechia                                                 | 1.05%<br>(0.97% - 1.14%)    | 1.25%<br>(1.16% - 1.34%)    | 1.21%<br>(1.13% - 1.30%)    | 1.13%<br>(1.05% - 1.23%)    | 0.00%<br>(0.00% - 0.00%) | 0.02%<br>(0.01% - 0.02%) | 0.02%<br>(0.01% - 0.03%) | 0.01%<br>(0.01% - 0.02%) | 0.00%<br>(0.00% - 0.00%) | 0.00%<br>(0.00% - 0.00%) | 0.00%<br>(0.00% - 0.00%) | 0.00%<br>(0.00% - 0.00%) |
| Hungary                                                 | 1.40%<br>(1.30% - 1.50%)    | 1.37%<br>(1.27% - 1.48%)    | 1.30%<br>(1.20% - 1.41%)    | 1.23%<br>(1.14% - 1.34%)    | 0.02%<br>(0.01% - 0.02%) | 0.02%<br>(0.01% - 0.03%) | 0.02%<br>(0.01% - 0.02%) | 0.01%<br>(0.01% - 0.02%) | 0.00%<br>(0.00% - 0.00%) | 0.00%<br>(0.00% - 0.00%) | 0.00%<br>(0.00% - 0.00%) | 0.00%<br>(0.00% - 0.00%) |
| North Macedonia                                         | 1.91%<br>(1.75% - 2.08%)    | 1.78%<br>(1.63% - 1.96%)    | 1.68%<br>(1.53% - 1.83%)    | 1.59%<br>(1.42% - 1.75%)    | 0.01%<br>(0.00% - 0.01%) | 0.01%<br>(0.00% - 0.02%) | 0.02%<br>(0.00% - 0.05%) | 0.02%<br>(0.00% - 0.04%) | 0.00%<br>(0.00% - 0.00%) | 0.00%<br>(0.00% - 0.00%) | 0.00%<br>(0.00% - 0.00%) | 0.00%<br>(0.00% - 0.00%) |
| Montenegro                                              | 1.13%<br>(1.03% - 1.23%)    | 1.62%<br>(1.49% - 1.76%)    | 1.91%<br>(1.75% - 2.07%)    | 2.44%<br>(2.24% - 2.65%)    | 0.00%<br>(0.00% - 0.00%) | 0.00%<br>(0.00% - 0.00%) | 0.01%<br>(0.00% - 0.03%) | 0.06%<br>(0.03% - 0.09%) | 0.00%<br>(0.00% - 0.00%) | 0.00%<br>(0.00% - 0.00%) | 0.00%<br>(0.00% - 0.00%) | 0.00%<br>(0.00% - 0.00%) |
| Poland                                                  | 2.06%<br>(1.90% - 2.25%)    | 2.10%<br>(1.92% - 2.28%)    | 1.73%<br>(1.60% - 1.89%)    | 1.53%<br>(1.41% - 1.65%)    | 0.01%<br>(0.00% - 0.02%) | 0.04%<br>(0.02% - 0.06%) | 0.02%<br>(0.01% - 0.03%) | 0.01%<br>(0.00% - 0.02%) | 0.00%<br>(0.00% - 0.00%) | 0.00%<br>(0.00% - 0.00%) | 0.00%<br>(0.00% - 0.00%) | 0.00%<br>(0.00% - 0.00%) |
| Romania                                                 | 3.78%<br>(3.50% - 4.04%)    | 2.99%<br>(2.81% - 3.18%)    | 2.42%<br>(2.26% - 2.60%)    | 2.19%<br>(2.03% - 2.34%)    | 0.17%<br>(0.13% - 0.21%) | 0.12%<br>(0.10% - 0.15%) | 0.09%<br>(0.07% - 0.12%) | 0.08%<br>(0.06% - 0.10%) | 0.00%<br>(0.00% - 0.00%) | 0.00%<br>(0.00% - 0.00%) | 0.00%<br>(0.00% - 0.00%) | 0.00%<br>(0.00% - 0.00%) |

Table S8c. Estimated overall, severe, and extreme underweight prevalence (%) in children under 5 years, both sexes, in 1990, 2000, 2010, and 2020.

| Location                        | Total                      |                           |                          |                          | Severe                   |                          |                          |                          | Extreme                  |                          |                          |                          |
|---------------------------------|----------------------------|---------------------------|--------------------------|--------------------------|--------------------------|--------------------------|--------------------------|--------------------------|--------------------------|--------------------------|--------------------------|--------------------------|
|                                 | 1990                       | 2000                      | 2010                     | 2020                     | 1990                     | 2000                     | 2010                     | 2020                     | 1990                     | 2000                     | 2010                     | 2020                     |
| Serbia                          | 0.77%<br>(0.71% - 0.84%)   | 1.12%<br>(1.03% - 1.22%)  | 1.61%<br>(1.49% - 1.73%) | 1.39%<br>(1.28% - 1.51%) | 0.00%<br>(0.00% - 0.00%) | 0.00%<br>(0.00% - 0.00%) | 0.01%<br>(0.00% - 0.01%) | 0.00%<br>(0.00% - 0.01%) | 0.00%<br>(0.00% - 0.00%) | 0.00%<br>(0.00% - 0.00%) | 0.00%<br>(0.00% - 0.00%) | 0.00%<br>(0.00% - 0.00%) |
| Slovakia                        | 2.37%<br>(2.18% - 2.56%)   | 2.61%<br>(2.40% - 2.83%)  | 2.01%<br>(2.09% - 2.45%) | 2.01%<br>(1.86% - 2.19%) | 0.03%<br>(0.01% - 0.05%) | 0.09%<br>(0.06% - 0.13%) | 0.07%<br>(0.04% - 0.10%) | 0.04%<br>(0.02% - 0.06%) | 0.00%<br>(0.00% - 0.00%) | 0.00%<br>(0.00% - 0.00%) | 0.00%<br>(0.00% - 0.00%) | 0.00%<br>(0.00% - 0.00%) |
| Slovenia                        | 2.12%<br>(1.94% - 2.32%)   | 2.23%<br>(2.05% - 2.42%)  | 1.78%<br>(1.62% - 1.94%) | 1.64%<br>(1.51% - 1.79%) | 0.03%<br>(0.01% - 0.05%) | 0.07%<br>(0.04% - 0.10%) | 0.04%<br>(0.02% - 0.06%) | 0.03%<br>(0.01% - 0.04%) | 0.00%<br>(0.00% - 0.00%) | 0.00%<br>(0.00% - 0.00%) | 0.00%<br>(0.00% - 0.00%) | 0.00%<br>(0.00% - 0.00%) |
| <b>Eastern Europe</b>           | 3.06%<br>(2.88% - 3.26%)   | 3.00%<br>(2.83% - 3.18%)  | 2.38%<br>(2.23% - 2.53%) | 2.13%<br>(1.98% - 2.29%) | 0.12%<br>(0.10% - 0.16%) | 0.13%<br>(0.11% - 0.17%) | 0.09%<br>(0.07% - 0.12%) | 0.08%<br>(0.06% - 0.11%) | 0.00%<br>(0.00% - 0.00%) | 0.00%<br>(0.00% - 0.00%) | 0.00%<br>(0.00% - 0.00%) | 0.00%<br>(0.00% - 0.00%) |
| Belarus                         | 1.64%<br>(1.53% - 1.75%)   | 1.69%<br>(1.59% - 1.81%)  | 1.55%<br>(1.44% - 1.65%) | 1.27%<br>(1.18% - 1.36%) | 0.07%<br>(0.05% - 0.10%) | 0.09%<br>(0.07% - 0.12%) | 0.09%<br>(0.07% - 0.11%) | 0.07%<br>(0.05% - 0.09%) | 0.00%<br>(0.00% - 0.00%) | 0.00%<br>(0.00% - 0.00%) | 0.00%<br>(0.00% - 0.00%) | 0.00%<br>(0.00% - 0.00%) |
| Estonia                         | 2.91%<br>(2.66% - 3.18%)   | 2.35%<br>(2.15% - 2.57%)  | 1.59%<br>(1.47% - 1.74%) | 1.47%<br>(1.35% - 1.61%) | 0.09%<br>(0.06% - 0.14%) | 0.06%<br>(0.04% - 0.09%) | 0.02%<br>(0.01% - 0.03%) | 0.01%<br>(0.01% - 0.02%) | 0.00%<br>(0.00% - 0.00%) | 0.00%<br>(0.00% - 0.00%) | 0.00%<br>(0.00% - 0.00%) | 0.00%<br>(0.00% - 0.00%) |
| Latvia                          | 2.80%<br>(2.56% - 3.04%)   | 2.62%<br>(2.39% - 2.88%)  | 1.87%<br>(1.71% - 2.07%) | 1.63%<br>(1.49% - 1.79%) | 0.07%<br>(0.04% - 0.11%) | 0.08%<br>(0.05% - 0.12%) | 0.02%<br>(0.01% - 0.04%) | 0.01%<br>(0.01% - 0.03%) | 0.00%<br>(0.00% - 0.00%) | 0.00%<br>(0.00% - 0.00%) | 0.00%<br>(0.00% - 0.00%) | 0.00%<br>(0.00% - 0.00%) |
| Lithuania                       | 2.54%<br>(2.31% - 2.78%)   | 2.14%<br>(1.94% - 2.36%)  | 1.59%<br>(1.45% - 1.74%) | 1.40%<br>(1.28% - 1.54%) | 0.06%<br>(0.03% - 0.09%) | 0.04%<br>(0.02% - 0.06%) | 0.01%<br>(0.01% - 0.02%) | 0.01%<br>(0.00% - 0.01%) | 0.00%<br>(0.00% - 0.00%) | 0.00%<br>(0.00% - 0.00%) | 0.00%<br>(0.00% - 0.00%) | 0.00%<br>(0.00% - 0.00%) |
| Republic of Moldova             | 2.82%<br>(2.55% - 3.10%)   | 2.88%<br>(2.62% - 3.15%)  | 2.45%<br>(2.26% - 2.68%) | 2.05%<br>(1.87% - 2.25%) | 0.06%<br>(0.02% - 0.12%) | 0.08%<br>(0.04% - 0.13%) | 0.05%<br>(0.02% - 0.09%) | 0.03%<br>(0.01% - 0.06%) | 0.00%<br>(0.00% - 0.00%) | 0.00%<br>(0.00% - 0.00%) | 0.00%<br>(0.00% - 0.00%) | 0.00%<br>(0.00% - 0.00%) |
| Russian Federation              | 3.49%<br>(3.23% - 3.78%)   | 3.34%<br>(3.10% - 3.60%)  | 2.61%<br>(2.41% - 2.82%) | 2.30%<br>(2.11% - 2.51%) | 0.15%<br>(0.11% - 0.21%) | 0.16%<br>(0.12% - 0.21%) | 0.12%<br>(0.08% - 0.15%) | 0.10%<br>(0.07% - 0.13%) | 0.00%<br>(0.00% - 0.00%) | 0.00%<br>(0.00% - 0.00%) | 0.00%<br>(0.00% - 0.00%) | 0.00%<br>(0.00% - 0.00%) |
| Ukraine                         | 2.14%<br>(1.99% - 2.32%)   | 2.38%<br>(2.20% - 2.58%)  | 1.84%<br>(1.69% - 2.02%) | 1.65%<br>(1.53% - 1.80%) | 0.05%<br>(0.04% - 0.07%) | 0.08%<br>(0.06% - 0.11%) | 0.03%<br>(0.02% - 0.05%) | 0.02%<br>(0.01% - 0.04%) | 0.00%<br>(0.00% - 0.00%) | 0.00%<br>(0.00% - 0.00%) | 0.00%<br>(0.00% - 0.00%) | 0.00%<br>(0.00% - 0.00%) |
| <b>High-income</b>              | 1.60%<br>(1.57% - 1.63%)   | 1.43%<br>(1.40% - 1.46%)  | 1.28%<br>(1.26% - 1.31%) | 1.21%<br>(1.18% - 1.23%) | 0.03%<br>(0.03% - 0.03%) | 0.03%<br>(0.03% - 0.03%) | 0.03%<br>(0.02% - 0.03%) | 0.02%<br>(0.02% - 0.03%) | 0.00%<br>(0.00% - 0.00%) | 0.00%<br>(0.00% - 0.00%) | 0.00%<br>(0.00% - 0.00%) | 0.00%<br>(0.00% - 0.00%) |
| Australasia                     | 0.31%<br>(0.26% - 0.34%)   | 0.27%<br>(0.21% - 0.31%)  | 0.24%<br>(0.18% - 0.27%) | 0.23%<br>(0.18% - 0.26%) | 0.00%<br>(0.00% - 0.00%) | 0.00%<br>(0.00% - 0.00%) | 0.00%<br>(0.00% - 0.00%) | 0.00%<br>(0.00% - 0.00%) | 0.00%<br>(0.00% - 0.00%) | 0.00%<br>(0.00% - 0.00%) | 0.00%<br>(0.00% - 0.00%) | 0.00%<br>(0.00% - 0.00%) |
| Australia                       | 0.23%<br>(0.16% - 0.26%)   | 0.21%<br>(0.13% - 0.25%)  | 0.19%<br>(0.12% - 0.23%) | 0.19%<br>(0.13% - 0.22%) | 0.00%<br>(0.00% - 0.00%) | 0.00%<br>(0.00% - 0.00%) | 0.00%<br>(0.00% - 0.00%) | 0.00%<br>(0.00% - 0.00%) | 0.00%<br>(0.00% - 0.00%) | 0.00%<br>(0.00% - 0.00%) | 0.00%<br>(0.00% - 0.00%) | 0.00%<br>(0.00% - 0.00%) |
| New Zealand                     | 0.70%<br>(0.65% - 0.75%)   | 0.58%<br>(0.52% - 0.63%)  | 0.46%<br>(0.41% - 0.50%) | 0.43%<br>(0.38% - 0.46%) | 0.01%<br>(0.00% - 0.01%) | 0.00%<br>(0.00% - 0.01%) | 0.00%<br>(0.00% - 0.00%) | 0.00%<br>(0.00% - 0.00%) | 0.00%<br>(0.00% - 0.00%) | 0.00%<br>(0.00% - 0.00%) | 0.00%<br>(0.00% - 0.00%) | 0.00%<br>(0.00% - 0.00%) |
| <b>High-income Asia Pacific</b> | 3.27%<br>(3.22% - 3.33%)   | 2.90%<br>(2.85% - 2.95%)  | 2.93%<br>(2.88% - 2.98%) | 2.81%<br>(2.76% - 2.86%) | 0.08%<br>(0.08% - 0.09%) | 0.09%<br>(0.08% - 0.09%) | 0.11%<br>(0.10% - 0.11%) | 0.11%<br>(0.10% - 0.11%) | 0.00%<br>(0.00% - 0.00%) | 0.00%<br>(0.00% - 0.00%) | 0.00%<br>(0.00% - 0.00%) | 0.00%<br>(0.00% - 0.00%) |
| Brunei Darussalam               | 10.54%<br>(9.86% - 11.24%) | 9.47%<br>(8.89% - 10.10%) | 8.83%<br>(8.31% - 9.39%) | 8.47%<br>(7.94% - 9.05%) | 2.00%<br>(1.73% - 2.28%) | 1.82%<br>(1.59% - 2.06%) | 1.71%<br>(1.52% - 1.94%) | 1.66%<br>(1.47% - 1.89%) | 0.20%<br>(0.15% - 0.26%) | 0.18%<br>(0.13% - 0.23%) | 0.17%<br>(0.12% - 0.22%) | 0.16%<br>(0.12% - 0.21%) |
| Japan                           | 3.98%<br>(3.91% - 4.04%)   | 3.67%<br>(3.61% - 3.73%)  | 3.62%<br>(3.57% - 3.68%) | 3.47%<br>(3.40% - 3.53%) | 0.11%<br>(0.10% - 0.12%) | 0.12%<br>(0.11% - 0.13%) | 0.14%<br>(0.13% - 0.15%) | 0.14%<br>(0.13% - 0.15%) | 0.00%<br>(0.00% - 0.00%) | 0.00%<br>(0.00% - 0.00%) | 0.00%<br>(0.00% - 0.00%) | 0.00%<br>(0.00% - 0.00%) |
| <i>Hokkaidō</i>                 | 5.84%<br>(5.42% - 6.35%)   | 5.31%<br>(4.88% - 5.73%)  | 5.27%<br>(4.87% - 5.65%) | 5.05%<br>(4.66% - 5.44%) | 0.39%<br>(0.30% - 0.51%) | 0.40%<br>(0.31% - 0.51%) | 0.45%<br>(0.36% - 0.55%) | 0.43%<br>(0.34% - 0.54%) | 0.00%<br>(0.00% - 0.00%) | 0.00%<br>(0.00% - 0.00%) | 0.00%<br>(0.00% - 0.00%) | 0.00%<br>(0.00% - 0.00%) |
| <i>Aomori</i>                   | 3.97%<br>(3.62% - 4.33%)   | 3.69%<br>(3.38% - 4.02%)  | 3.57%<br>(3.28% - 3.90%) | 3.36%<br>(3.08% - 3.64%) | 0.10%<br>(0.07% - 0.15%) | 0.13%<br>(0.09% - 0.17%) | 0.14%<br>(0.10% - 0.20%) | 0.14%<br>(0.10% - 0.19%) | 0.00%<br>(0.00% - 0.00%) | 0.00%<br>(0.00% - 0.00%) | 0.00%<br>(0.00% - 0.00%) | 0.00%<br>(0.00% - 0.00%) |
| <i>Iwate</i>                    | 3.84%<br>(3.54% - 4.18%)   | 3.55%<br>(3.26% - 3.87%)  | 3.52%<br>(3.26% - 3.82%) | 3.31%<br>(3.03% - 3.59%) | 0.09%<br>(0.05% - 0.13%) | 0.11%<br>(0.07% - 0.16%) | 0.13%<br>(0.09% - 0.18%) | 0.12%<br>(0.08% - 0.17%) | 0.00%<br>(0.00% - 0.00%) | 0.00%<br>(0.00% - 0.00%) | 0.00%<br>(0.00% - 0.00%) | 0.00%<br>(0.00% - 0.00%) |
| <i>Miyagi</i>                   | 3.56%<br>(3.24% - 3.87%)   | 3.37%<br>(3.07% - 3.67%)  | 3.37%<br>(3.09% - 3.67%) | 3.19%<br>(2.91% - 3.46%) | 0.06%<br>(0.04% - 0.10%) | 0.08%<br>(0.05% - 0.12%) | 0.10%<br>(0.07% - 0.15%) | 0.10%<br>(0.06% - 0.14%) | 0.00%<br>(0.00% - 0.00%) | 0.00%<br>(0.00% - 0.00%) | 0.00%<br>(0.00% - 0.00%) | 0.00%<br>(0.00% - 0.00%) |
| <i>Akita</i>                    | 3.75%<br>(3.44% - 4.12%)   | 3.49%<br>(3.19% - 3.83%)  | 3.47%<br>(3.16% - 3.78%) | 3.32%<br>(3.02% - 3.62%) | 0.05%<br>(0.03% - 0.07%) | 0.06%<br>(0.04% - 0.10%) | 0.08%<br>(0.05% - 0.12%) | 0.08%<br>(0.05% - 0.11%) | 0.00%<br>(0.00% - 0.00%) | 0.00%<br>(0.00% - 0.00%) | 0.00%<br>(0.00% - 0.00%) | 0.00%<br>(0.00% - 0.00%) |

Table S8c. Estimated overall, severe, and extreme underweight prevalence (%) in children under 5 years, both sexes, in 1990, 2000, 2010, and 2020.

| Location         | Total                    |                          |                          |                          | Severe                   |                          |                          |                          | Extreme                  |                          |                          |                          |
|------------------|--------------------------|--------------------------|--------------------------|--------------------------|--------------------------|--------------------------|--------------------------|--------------------------|--------------------------|--------------------------|--------------------------|--------------------------|
|                  | 1990                     | 2000                     | 2010                     | 2020                     | 1990                     | 2000                     | 2010                     | 2020                     | 1990                     | 2000                     | 2010                     | 2020                     |
| <i>Yamagata</i>  | 3.61%<br>(3.28% - 3.93%) | 3.45%<br>(3.16% - 3.77%) | 3.43%<br>(3.14% - 3.73%) | 3.28%<br>(3.01% - 3.57%) | 0.07%<br>(0.04% - 0.11%) | 0.09%<br>(0.06% - 0.13%) | 0.11%<br>(0.08% - 0.16%) | 0.11%<br>(0.07% - 0.16%) | 0.00%<br>(0.00% - 0.00%) | 0.00%<br>(0.00% - 0.00%) | 0.00%<br>(0.00% - 0.00%) | 0.00%<br>(0.00% - 0.00%) |
| <i>Fukushima</i> | 1.89%<br>(1.75% - 2.06%) | 1.73%<br>(1.59% - 1.87%) | 1.68%<br>(1.56% - 1.82%) | 1.60%<br>(1.47% - 1.72%) | 0.00%<br>(0.00% - 0.01%) | 0.00%<br>(0.00% - 0.01%) | 0.01%<br>(0.00% - 0.01%) | 0.00%<br>(0.00% - 0.01%) | 0.00%<br>(0.00% - 0.00%) | 0.00%<br>(0.00% - 0.00%) | 0.00%<br>(0.00% - 0.00%) | 0.00%<br>(0.00% - 0.00%) |
| <i>Ibaraki</i>   | 3.43%<br>(3.11% - 3.81%) | 3.16%<br>(2.87% - 3.47%) | 3.08%<br>(2.78% - 3.37%) | 2.92%<br>(2.62% - 3.22%) | 0.04%<br>(0.02% - 0.07%) | 0.04%<br>(0.02% - 0.08%) | 0.06%<br>(0.03% - 0.09%) | 0.05%<br>(0.03% - 0.09%) | 0.00%<br>(0.00% - 0.00%) | 0.00%<br>(0.00% - 0.00%) | 0.00%<br>(0.00% - 0.00%) | 0.00%<br>(0.00% - 0.00%) |
| <i>Tochigi</i>   | 4.22%<br>(3.85% - 4.58%) | 3.89%<br>(3.55% - 4.22%) | 3.80%<br>(3.48% - 4.13%) | 3.60%<br>(3.32% - 3.92%) | 0.09%<br>(0.06% - 0.14%) | 0.11%<br>(0.07% - 0.16%) | 0.13%<br>(0.09% - 0.18%) | 0.12%<br>(0.08% - 0.18%) | 0.00%<br>(0.00% - 0.00%) | 0.00%<br>(0.00% - 0.00%) | 0.00%<br>(0.00% - 0.00%) | 0.00%<br>(0.00% - 0.00%) |
| <i>Gunma</i>     | 3.51%<br>(3.24% - 3.80%) | 3.25%<br>(2.97% - 3.56%) | 3.20%<br>(2.91% - 3.47%) | 3.02%<br>(2.77% - 3.30%) | 0.04%<br>(0.02% - 0.05%) | 0.04%<br>(0.02% - 0.06%) | 0.05%<br>(0.03% - 0.07%) | 0.05%<br>(0.03% - 0.07%) | 0.00%<br>(0.00% - 0.00%) | 0.00%<br>(0.00% - 0.00%) | 0.00%<br>(0.00% - 0.00%) | 0.00%<br>(0.00% - 0.00%) |
| <i>Saitama</i>   | 3.65%<br>(3.34% - 3.99%) | 3.35%<br>(3.09% - 3.66%) | 3.31%<br>(3.03% - 3.60%) | 3.16%<br>(2.91% - 3.45%) | 0.04%<br>(0.02% - 0.06%) | 0.04%<br>(0.03% - 0.06%) | 0.05%<br>(0.04% - 0.08%) | 0.05%<br>(0.03% - 0.08%) | 0.00%<br>(0.00% - 0.00%) | 0.00%<br>(0.00% - 0.00%) | 0.00%<br>(0.00% - 0.00%) | 0.00%<br>(0.00% - 0.00%) |
| <i>Chiba</i>     | 2.93%<br>(2.69% - 3.19%) | 2.72%<br>(2.51% - 2.97%) | 2.69%<br>(2.48% - 2.92%) | 2.58%<br>(2.36% - 2.80%) | 0.02%<br>(0.01% - 0.03%) | 0.02%<br>(0.01% - 0.04%) | 0.03%<br>(0.02% - 0.04%) | 0.03%<br>(0.02% - 0.04%) | 0.00%<br>(0.00% - 0.00%) | 0.00%<br>(0.00% - 0.00%) | 0.00%<br>(0.00% - 0.00%) | 0.00%<br>(0.00% - 0.00%) |
| <i>Tōkyō</i>     | 4.20%<br>(3.87% - 4.58%) | 3.95%<br>(3.64% - 4.25%) | 3.87%<br>(3.60% - 4.16%) | 3.72%<br>(3.43% - 4.00%) | 0.14%<br>(0.10% - 0.20%) | 0.16%<br>(0.11% - 0.21%) | 0.18%<br>(0.14% - 0.24%) | 0.18%<br>(0.13% - 0.23%) | 0.00%<br>(0.00% - 0.00%) | 0.00%<br>(0.00% - 0.00%) | 0.00%<br>(0.00% - 0.00%) | 0.00%<br>(0.00% - 0.00%) |
| <i>Kanagawa</i>  | 4.65%<br>(4.27% - 5.03%) | 4.33%<br>(3.98% - 4.67%) | 4.29%<br>(4.00% - 4.63%) | 4.14%<br>(3.82% - 4.50%) | 0.16%<br>(0.11% - 0.23%) | 0.18%<br>(0.13% - 0.24%) | 0.21%<br>(0.16% - 0.28%) | 0.21%<br>(0.15% - 0.28%) | 0.00%<br>(0.00% - 0.00%) | 0.00%<br>(0.00% - 0.00%) | 0.00%<br>(0.00% - 0.00%) | 0.00%<br>(0.00% - 0.00%) |
| <i>Niigata</i>   | 6.50%<br>(6.00% - 7.05%) | 6.02%<br>(5.55% - 6.51%) | 6.00%<br>(5.52% - 6.48%) | 5.75%<br>(5.27% - 6.24%) | 0.45%<br>(0.34% - 0.59%) | 0.47%<br>(0.35% - 0.60%) | 0.52%<br>(0.40% - 0.64%) | 0.50%<br>(0.38% - 0.64%) | 0.00%<br>(0.00% - 0.00%) | 0.00%<br>(0.00% - 0.00%) | 0.00%<br>(0.00% - 0.00%) | 0.00%<br>(0.00% - 0.00%) |
| <i>Toyama</i>    | 3.51%<br>(3.20% - 3.81%) | 3.31%<br>(3.03% - 3.61%) | 3.30%<br>(3.02% - 3.59%) | 3.15%<br>(2.89% - 3.43%) | 0.08%<br>(0.05% - 0.13%) | 0.11%<br>(0.07% - 0.16%) | 0.13%<br>(0.08% - 0.18%) | 0.12%<br>(0.07% - 0.17%) | 0.00%<br>(0.00% - 0.00%) | 0.00%<br>(0.00% - 0.00%) | 0.00%<br>(0.00% - 0.00%) | 0.00%<br>(0.00% - 0.00%) |
| <i>Ishikawa</i>  | 3.52%<br>(3.20% - 3.85%) | 3.33%<br>(3.03% - 3.62%) | 3.34%<br>(3.07% - 3.64%) | 3.22%<br>(2.93% - 3.51%) | 0.06%<br>(0.03% - 0.10%) | 0.08%<br>(0.05% - 0.13%) | 0.11%<br>(0.07% - 0.16%) | 0.10%<br>(0.06% - 0.16%) | 0.00%<br>(0.00% - 0.00%) | 0.00%<br>(0.00% - 0.00%) | 0.00%<br>(0.00% - 0.00%) | 0.00%<br>(0.00% - 0.00%) |
| <i>Fukui</i>     | 3.52%<br>(3.20% - 3.84%) | 3.33%<br>(3.05% - 3.61%) | 3.30%<br>(3.03% - 3.58%) | 3.19%<br>(2.92% - 3.48%) | 0.07%<br>(0.03% - 0.11%) | 0.09%<br>(0.05% - 0.13%) | 0.11%<br>(0.07% - 0.16%) | 0.11%<br>(0.07% - 0.16%) | 0.00%<br>(0.00% - 0.00%) | 0.00%<br>(0.00% - 0.00%) | 0.00%<br>(0.00% - 0.00%) | 0.00%<br>(0.00% - 0.00%) |
| <i>Yamanashi</i> | 3.59%<br>(3.26% - 3.92%) | 3.41%<br>(3.13% - 3.70%) | 3.35%<br>(3.09% - 3.65%) | 3.22%<br>(2.96% - 3.49%) | 0.09%<br>(0.05% - 0.13%) | 0.11%<br>(0.07% - 0.16%) | 0.13%<br>(0.09% - 0.18%) | 0.13%<br>(0.08% - 0.18%) | 0.00%<br>(0.00% - 0.00%) | 0.00%<br>(0.00% - 0.00%) | 0.00%<br>(0.00% - 0.00%) | 0.00%<br>(0.00% - 0.00%) |
| <i>Nagano</i>    | 3.42%<br>(3.11% - 3.74%) | 3.27%<br>(2.96% - 3.57%) | 3.27%<br>(2.97% - 3.55%) | 3.14%<br>(2.85% - 3.45%) | 0.02%<br>(0.00% - 0.04%) | 0.03%<br>(0.01% - 0.06%) | 0.05%<br>(0.02% - 0.08%) | 0.04%<br>(0.02% - 0.08%) | 0.00%<br>(0.00% - 0.00%) | 0.00%<br>(0.00% - 0.00%) | 0.00%<br>(0.00% - 0.00%) | 0.00%<br>(0.00% - 0.00%) |
| <i>Gifu</i>      | 3.59%<br>(3.27% - 3.91%) | 3.42%<br>(3.14% - 3.72%) | 3.38%<br>(3.11% - 3.64%) | 3.23%<br>(2.95% - 3.52%) | 0.09%<br>(0.05% - 0.15%) | 0.12%<br>(0.08% - 0.17%) | 0.14%<br>(0.09% - 0.19%) | 0.13%<br>(0.09% - 0.19%) | 0.00%<br>(0.00% - 0.00%) | 0.00%<br>(0.00% - 0.00%) | 0.00%<br>(0.00% - 0.00%) | 0.00%<br>(0.00% - 0.00%) |
| <i>Shizuoka</i>  | 6.02%<br>(5.54% - 6.55%) | 5.53%<br>(5.11% - 6.00%) | 5.42%<br>(5.00% - 5.88%) | 5.20%<br>(4.78% - 5.62%) | 0.36%<br>(0.26% - 0.47%) | 0.38%<br>(0.29% - 0.49%) | 0.41%<br>(0.32% - 0.53%) | 0.40%<br>(0.31% - 0.50%) | 0.00%<br>(0.00% - 0.00%) | 0.00%<br>(0.00% - 0.00%) | 0.00%<br>(0.00% - 0.00%) | 0.00%<br>(0.00% - 0.00%) |
| <i>Aichi</i>     | 3.56%<br>(3.26% - 3.87%) | 3.33%<br>(3.07% - 3.63%) | 3.24%<br>(2.96% - 3.51%) | 3.05%<br>(2.79% - 3.31%) | 0.03%<br>(0.01% - 0.05%) | 0.04%<br>(0.02% - 0.06%) | 0.05%<br>(0.03% - 0.07%) | 0.04%<br>(0.03% - 0.07%) | 0.00%<br>(0.00% - 0.00%) | 0.00%<br>(0.00% - 0.00%) | 0.00%<br>(0.00% - 0.00%) | 0.00%<br>(0.00% - 0.00%) |
| <i>Mie</i>       | 3.62%<br>(3.30% - 3.93%) | 3.41%<br>(3.12% - 3.70%) | 3.33%<br>(3.05% - 3.61%) | 3.15%<br>(2.89% - 3.43%) | 0.09%<br>(0.05% - 0.14%) | 0.11%<br>(0.07% - 0.16%) | 0.13%<br>(0.08% - 0.19%) | 0.12%<br>(0.08% - 0.18%) | 0.00%<br>(0.00% - 0.00%) | 0.00%<br>(0.00% - 0.00%) | 0.00%<br>(0.00% - 0.00%) | 0.00%<br>(0.00% - 0.00%) |
| <i>Shiga</i>     | 2.70%<br>(2.49% - 2.94%) | 2.49%<br>(2.30% - 2.70%) | 2.46%<br>(2.28% - 2.67%) | 2.35%<br>(2.16% - 2.54%) | 0.02%<br>(0.01% - 0.04%) | 0.03%<br>(0.01% - 0.04%) | 0.03%<br>(0.02% - 0.05%) | 0.03%<br>(0.02% - 0.05%) | 0.00%<br>(0.00% - 0.00%) | 0.00%<br>(0.00% - 0.00%) | 0.00%<br>(0.00% - 0.00%) | 0.00%<br>(0.00% - 0.00%) |
| <i>Kyōto</i>     | 4.19%<br>(3.83% - 4.53%) | 3.88%<br>(3.56% - 4.22%) | 3.83%<br>(3.48% - 4.18%) | 3.66%<br>(3.35% - 3.99%) | 0.09%<br>(0.06% - 0.13%) | 0.10%<br>(0.07% - 0.15%) | 0.13%<br>(0.09% - 0.18%) | 0.12%<br>(0.08% - 0.17%) | 0.00%<br>(0.00% - 0.00%) | 0.00%<br>(0.00% - 0.00%) | 0.00%<br>(0.00% - 0.00%) | 0.00%<br>(0.00% - 0.00%) |
| <i>Ōsaka</i>     | 4.49%<br>(4.11% - 4.87%) | 4.08%<br>(3.75% - 4.41%) | 3.99%<br>(3.67% - 4.31%) | 3.82%<br>(3.50% - 4.12%) | 0.12%<br>(0.08% - 0.18%) | 0.14%<br>(0.09% - 0.20%) | 0.17%<br>(0.12% - 0.22%) | 0.16%<br>(0.11% - 0.22%) | 0.00%<br>(0.00% - 0.00%) | 0.00%<br>(0.00% - 0.00%) | 0.00%<br>(0.00% - 0.00%) | 0.00%<br>(0.00% - 0.00%) |
| <i>Hyōgo</i>     | 3.32%<br>(3.02% - 3.60%) | 3.02%<br>(2.77% - 3.26%) | 2.99%<br>(2.74% - 3.25%) | 2.86%<br>(2.62% - 3.12%) | 0.04%<br>(0.02% - 0.06%) | 0.05%<br>(0.03% - 0.07%) | 0.06%<br>(0.04% - 0.08%) | 0.05%<br>(0.04% - 0.08%) | 0.00%<br>(0.00% - 0.00%) | 0.00%<br>(0.00% - 0.00%) | 0.00%<br>(0.00% - 0.00%) | 0.00%<br>(0.00% - 0.00%) |

Table S8c. Estimated overall, severe, and extreme **underweight** prevalence (%) in children under 5 years, both sexes, in 1990, 2000, 2010, and 2020.

| Location                         | Total                    |                          |                          |                          | Severe                   |                          |                          |                          | Extreme                  |                          |                          |                          |
|----------------------------------|--------------------------|--------------------------|--------------------------|--------------------------|--------------------------|--------------------------|--------------------------|--------------------------|--------------------------|--------------------------|--------------------------|--------------------------|
|                                  | 1990                     | 2000                     | 2010                     | 2020                     | 1990                     | 2000                     | 2010                     | 2020                     | 1990                     | 2000                     | 2010                     | 2020                     |
| <i>Nara</i>                      | 3.70%<br>(3.39% - 4.03%) | 3.49%<br>(3.19% - 3.81%) | 3.48%<br>(3.17% - 3.77%) | 3.34%<br>(3.05% - 3.64%) | 0.08%<br>(0.05% - 0.12%) | 0.11%<br>(0.07% - 0.15%) | 0.13%<br>(0.08% - 0.17%) | 0.12%<br>(0.08% - 0.17%) | 0.00%<br>(0.00% - 0.00%) | 0.00%<br>(0.00% - 0.00%) | 0.00%<br>(0.00% - 0.00%) | 0.00%<br>(0.00% - 0.00%) |
| <i>Wakayama</i>                  | 3.71%<br>(3.37% - 4.07%) | 3.50%<br>(3.19% - 3.82%) | 3.41%<br>(3.12% - 3.71%) | 3.24%<br>(2.95% - 3.53%) | 0.03%<br>(0.01% - 0.07%) | 0.05%<br>(0.02% - 0.09%) | 0.07%<br>(0.03% - 0.11%) | 0.06%<br>(0.03% - 0.11%) | 0.00%<br>(0.00% - 0.00%) | 0.00%<br>(0.00% - 0.00%) | 0.00%<br>(0.00% - 0.00%) | 0.00%<br>(0.00% - 0.00%) |
| <i>Tottari</i>                   | 3.68%<br>(3.38% - 4.00%) | 3.47%<br>(3.19% - 3.77%) | 3.48%<br>(3.20% - 3.76%) | 3.35%<br>(3.08% - 3.65%) | 0.10%<br>(0.06% - 0.15%) | 0.13%<br>(0.08% - 0.18%) | 0.15%<br>(0.10% - 0.21%) | 0.15%<br>(0.10% - 0.21%) | 0.00%<br>(0.00% - 0.00%) | 0.00%<br>(0.00% - 0.00%) | 0.00%<br>(0.00% - 0.00%) | 0.00%<br>(0.00% - 0.00%) |
| <i>Shimane</i>                   | 3.72%<br>(3.41% - 4.06%) | 3.49%<br>(3.19% - 3.79%) | 3.44%<br>(3.18% - 3.74%) | 3.27%<br>(3.00% - 3.54%) | 0.12%<br>(0.08% - 0.17%) | 0.14%<br>(0.09% - 0.20%) | 0.16%<br>(0.12% - 0.22%) | 0.15%<br>(0.11% - 0.21%) | 0.00%<br>(0.00% - 0.00%) | 0.00%<br>(0.00% - 0.00%) | 0.00%<br>(0.00% - 0.00%) | 0.00%<br>(0.00% - 0.00%) |
| <i>Okayama</i>                   | 1.15%<br>(1.06% - 1.24%) | 1.07%<br>(0.99% - 1.18%) | 1.06%<br>(0.98% - 1.15%) | 1.00%<br>(0.93% - 1.08%) | 0.00%<br>(0.00% - 0.00%) | 0.00%<br>(0.00% - 0.00%) | 0.00%<br>(0.00% - 0.00%) | 0.00%<br>(0.00% - 0.00%) | 0.00%<br>(0.00% - 0.00%) | 0.00%<br>(0.00% - 0.00%) | 0.00%<br>(0.00% - 0.00%) | 0.00%<br>(0.00% - 0.00%) |
| <i>Hiroshima</i>                 | 2.83%<br>(2.58% - 3.08%) | 2.62%<br>(2.39% - 2.84%) | 2.59%<br>(2.39% - 2.81%) | 2.47%<br>(2.28% - 2.69%) | 0.03%<br>(0.01% - 0.04%) | 0.03%<br>(0.02% - 0.04%) | 0.04%<br>(0.03% - 0.05%) | 0.03%<br>(0.02% - 0.05%) | 0.00%<br>(0.00% - 0.00%) | 0.00%<br>(0.00% - 0.00%) | 0.00%<br>(0.00% - 0.00%) | 0.00%<br>(0.00% - 0.00%) |
| <i>Yamaguchi</i>                 | 3.58%<br>(3.26% - 3.92%) | 3.38%<br>(3.08% - 3.69%) | 3.33%<br>(3.05% - 3.61%) | 3.16%<br>(2.89% - 3.44%) | 0.04%<br>(0.02% - 0.07%) | 0.06%<br>(0.03% - 0.10%) | 0.08%<br>(0.04% - 0.12%) | 0.07%<br>(0.04% - 0.11%) | 0.00%<br>(0.00% - 0.00%) | 0.00%<br>(0.00% - 0.00%) | 0.00%<br>(0.00% - 0.00%) | 0.00%<br>(0.00% - 0.00%) |
| <i>Tokushima</i>                 | 3.76%<br>(3.43% - 4.10%) | 3.52%<br>(3.22% - 3.82%) | 3.42%<br>(3.14% - 3.73%) | 3.22%<br>(2.95% - 3.49%) | 0.04%<br>(0.02% - 0.07%) | 0.06%<br>(0.03% - 0.10%) | 0.08%<br>(0.04% - 0.12%) | 0.07%<br>(0.04% - 0.11%) | 0.00%<br>(0.00% - 0.00%) | 0.00%<br>(0.00% - 0.00%) | 0.00%<br>(0.00% - 0.00%) | 0.00%<br>(0.00% - 0.00%) |
| <i>Kagawa</i>                    | 3.56%<br>(3.26% - 3.89%) | 3.39%<br>(3.10% - 3.70%) | 3.37%<br>(3.10% - 3.64%) | 3.21%<br>(2.94% - 3.47%) | 0.06%<br>(0.03% - 0.11%) | 0.09%<br>(0.05% - 0.14%) | 0.11%<br>(0.07% - 0.15%) | 0.10%<br>(0.06% - 0.14%) | 0.00%<br>(0.00% - 0.00%) | 0.00%<br>(0.00% - 0.00%) | 0.00%<br>(0.00% - 0.00%) | 0.00%<br>(0.00% - 0.00%) |
| <i>Ehime</i>                     | 3.71%<br>(3.39% - 4.03%) | 3.47%<br>(3.17% - 3.76%) | 3.45%<br>(3.17% - 3.75%) | 3.28%<br>(3.01% - 3.55%) | 0.07%<br>(0.05% - 0.11%) | 0.09%<br>(0.06% - 0.14%) | 0.11%<br>(0.08% - 0.16%) | 0.11%<br>(0.07% - 0.15%) | 0.00%<br>(0.00% - 0.00%) | 0.00%<br>(0.00% - 0.00%) | 0.00%<br>(0.00% - 0.00%) | 0.00%<br>(0.00% - 0.00%) |
| <i>Kōchi</i>                     | 3.86%<br>(3.53% - 4.21%) | 3.62%<br>(3.32% - 3.97%) | 3.57%<br>(3.27% - 3.86%) | 3.36%<br>(3.06% - 3.65%) | 0.11%<br>(0.06% - 0.16%) | 0.13%<br>(0.09% - 0.19%) | 0.16%<br>(0.11% - 0.22%) | 0.15%<br>(0.10% - 0.21%) | 0.00%<br>(0.00% - 0.00%) | 0.00%<br>(0.00% - 0.00%) | 0.00%<br>(0.00% - 0.00%) | 0.00%<br>(0.00% - 0.00%) |
| <i>Fukuoka</i>                   | 4.55%<br>(4.16% - 4.94%) | 4.16%<br>(3.83% - 4.50%) | 4.10%<br>(3.79% - 4.43%) | 3.92%<br>(3.60% - 4.25%) | 0.09%<br>(0.06% - 0.14%) | 0.11%<br>(0.07% - 0.16%) | 0.14%<br>(0.10% - 0.20%) | 0.14%<br>(0.09% - 0.19%) | 0.00%<br>(0.00% - 0.00%) | 0.00%<br>(0.00% - 0.00%) | 0.00%<br>(0.00% - 0.00%) | 0.00%<br>(0.00% - 0.00%) |
| <i>Saga</i>                      | 3.77%<br>(3.46% - 4.11%) | 3.53%<br>(3.24% - 3.85%) | 3.48%<br>(3.22% - 3.77%) | 3.32%<br>(3.06% - 3.61%) | 0.12%<br>(0.08% - 0.18%) | 0.15%<br>(0.10% - 0.21%) | 0.17%<br>(0.13% - 0.24%) | 0.16%<br>(0.11% - 0.22%) | 0.00%<br>(0.00% - 0.00%) | 0.00%<br>(0.00% - 0.00%) | 0.00%<br>(0.00% - 0.00%) | 0.00%<br>(0.00% - 0.00%) |
| <i>Nagasaki</i>                  | 5.40%<br>(4.97% - 5.87%) | 4.88%<br>(4.50% - 5.28%) | 4.78%<br>(4.43% - 5.17%) | 4.54%<br>(4.19% - 4.91%) | 0.23%<br>(0.15% - 0.31%) | 0.25%<br>(0.18% - 0.33%) | 0.29%<br>(0.21% - 0.37%) | 0.27%<br>(0.21% - 0.36%) | 0.00%<br>(0.00% - 0.00%) | 0.00%<br>(0.00% - 0.00%) | 0.00%<br>(0.00% - 0.00%) | 0.00%<br>(0.00% - 0.00%) |
| <i>Kumamoto</i>                  | 3.71%<br>(3.39% - 4.02%) | 3.51%<br>(3.24% - 3.80%) | 3.50%<br>(3.22% - 3.81%) | 3.33%<br>(3.08% - 3.62%) | 0.12%<br>(0.07% - 0.17%) | 0.15%<br>(0.10% - 0.20%) | 0.18%<br>(0.12% - 0.24%) | 0.16%<br>(0.11% - 0.22%) | 0.00%<br>(0.00% - 0.00%) | 0.00%<br>(0.00% - 0.00%) | 0.00%<br>(0.00% - 0.00%) | 0.00%<br>(0.00% - 0.00%) |
| <i>Ōita</i>                      | 3.67%<br>(3.36% - 4.01%) | 3.42%<br>(3.13% - 3.72%) | 3.39%<br>(3.11% - 3.66%) | 3.23%<br>(2.94% - 3.52%) | 0.06%<br>(0.03% - 0.10%) | 0.08%<br>(0.05% - 0.13%) | 0.10%<br>(0.06% - 0.15%) | 0.10%<br>(0.06% - 0.14%) | 0.00%<br>(0.00% - 0.00%) | 0.00%<br>(0.00% - 0.00%) | 0.00%<br>(0.00% - 0.00%) | 0.00%<br>(0.00% - 0.00%) |
| <i>Miyazaki</i>                  | 3.86%<br>(3.54% - 4.21%) | 3.58%<br>(3.28% - 3.89%) | 3.52%<br>(3.24% - 3.82%) | 3.35%<br>(3.07% - 3.66%) | 0.10%<br>(0.05% - 0.15%) | 0.12%<br>(0.07% - 0.17%) | 0.14%<br>(0.10% - 0.20%) | 0.14%<br>(0.09% - 0.19%) | 0.00%<br>(0.00% - 0.00%) | 0.00%<br>(0.00% - 0.00%) | 0.00%<br>(0.00% - 0.00%) | 0.00%<br>(0.00% - 0.00%) |
| <i>Kagoshima</i>                 | 3.92%<br>(3.58% - 4.30%) | 3.64%<br>(3.32% - 4.00%) | 3.54%<br>(3.24% - 3.85%) | 3.34%<br>(3.03% - 3.63%) | 0.08%<br>(0.05% - 0.12%) | 0.10%<br>(0.06% - 0.15%) | 0.12%<br>(0.08% - 0.17%) | 0.11%<br>(0.07% - 0.16%) | 0.00%<br>(0.00% - 0.00%) | 0.00%<br>(0.00% - 0.00%) | 0.00%<br>(0.00% - 0.00%) | 0.00%<br>(0.00% - 0.00%) |
| <i>Okinawa</i>                   | 3.98%<br>(3.63% - 4.32%) | 3.79%<br>(3.49% - 4.14%) | 3.69%<br>(3.42% - 4.00%) | 3.48%<br>(3.21% - 3.77%) | 0.14%<br>(0.09% - 0.21%) | 0.17%<br>(0.12% - 0.23%) | 0.20%<br>(0.14% - 0.26%) | 0.18%<br>(0.13% - 0.24%) | 0.00%<br>(0.00% - 0.00%) | 0.00%<br>(0.00% - 0.00%) | 0.00%<br>(0.00% - 0.00%) | 0.00%<br>(0.00% - 0.00%) |
| Republic of Korea                | 1.73%<br>(1.61% - 1.87%) | 1.32%<br>(1.23% - 1.43%) | 1.18%<br>(1.09% - 1.28%) | 1.09%<br>(1.00% - 1.18%) | 0.00%<br>(0.00% - 0.00%) | 0.00%<br>(0.00% - 0.01%) | 0.00%<br>(0.00% - 0.00%) | 0.00%<br>(0.00% - 0.00%) | 0.00%<br>(0.00% - 0.00%) | 0.00%<br>(0.00% - 0.00%) | 0.00%<br>(0.00% - 0.00%) | 0.00%<br>(0.00% - 0.00%) |
| Singapore                        | 4.24%<br>(3.96% - 4.56%) | 3.35%<br>(3.18% - 3.51%) | 2.88%<br>(2.67% - 3.09%) | 2.68%<br>(2.46% - 2.91%) | 0.15%<br>(0.10% - 0.21%) | 0.12%<br>(0.09% - 0.16%) | 0.11%<br>(0.08% - 0.15%) | 0.10%<br>(0.06% - 0.14%) | 0.00%<br>(0.00% - 0.00%) | 0.00%<br>(0.00% - 0.00%) | 0.00%<br>(0.00% - 0.00%) | 0.00%<br>(0.00% - 0.00%) |
| <b>High-income North America</b> | 0.91%<br>(0.84% - 0.97%) | 0.96%<br>(0.89% - 1.02%) | 0.86%<br>(0.80% - 0.93%) | 0.84%<br>(0.78% - 0.90%) | 0.00%<br>(0.00% - 0.00%) | 0.00%<br>(0.00% - 0.00%) | 0.00%<br>(0.00% - 0.00%) | 0.00%<br>(0.00% - 0.00%) | 0.00%<br>(0.00% - 0.00%) | 0.00%<br>(0.00% - 0.00%) | 0.00%<br>(0.00% - 0.00%) | 0.00%<br>(0.00% - 0.00%) |
| Canada                           | 0.98%<br>(0.91% - 1.07%) | 0.98%<br>(0.90% - 1.08%) | 0.88%<br>(0.80% - 0.96%) | 0.85%<br>(0.79% - 0.94%) | 0.00%<br>(0.00% - 0.00%) | 0.00%<br>(0.00% - 0.00%) | 0.00%<br>(0.00% - 0.00%) | 0.00%<br>(0.00% - 0.00%) | 0.00%<br>(0.00% - 0.00%) | 0.00%<br>(0.00% - 0.00%) | 0.00%<br>(0.00% - 0.00%) | 0.00%<br>(0.00% - 0.00%) |



**Table S8c. Estimated overall, severe, and extreme underweight prevalence (%) in children under 5 years, both sexes, in 1990, 2000, 2010, and 2020.**

| Location                 | Total                    |                          |                          |                          | Severe                   |                          |                          |                          | Extreme                  |                          |                          |                          |
|--------------------------|--------------------------|--------------------------|--------------------------|--------------------------|--------------------------|--------------------------|--------------------------|--------------------------|--------------------------|--------------------------|--------------------------|--------------------------|
|                          | 1990                     | 2000                     | 2010                     | 2020                     | 1990                     | 2000                     | 2010                     | 2020                     | 1990                     | 2000                     | 2010                     | 2020                     |
| United States of America | 0.90%<br>(0.83% - 0.97%) | 0.96%<br>(0.88% - 1.03%) | 0.86%<br>(0.80% - 0.93%) | 0.84%<br>(0.78% - 0.91%) | 0.00%<br>(0.00% - 0.00%) | 0.00%<br>(0.00% - 0.00%) | 0.00%<br>(0.00% - 0.00%) | 0.00%<br>(0.00% - 0.00%) | 0.00%<br>(0.00% - 0.00%) | 0.00%<br>(0.00% - 0.00%) | 0.00%<br>(0.00% - 0.00%) | 0.00%<br>(0.00% - 0.00%) |
| Alabama                  | 0.97%<br>(0.87% - 1.08%) | 1.03%<br>(0.92% - 1.15%) | 0.93%<br>(0.83% - 1.04%) | 0.92%<br>(0.82% - 1.02%) | 0.00%<br>(0.00% - 0.00%) | 0.00%<br>(0.00% - 0.00%) | 0.00%<br>(0.00% - 0.00%) | 0.00%<br>(0.00% - 0.00%) | 0.00%<br>(0.00% - 0.00%) | 0.00%<br>(0.00% - 0.00%) | 0.00%<br>(0.00% - 0.00%) | 0.00%<br>(0.00% - 0.00%) |
| Alaska                   | 0.89%<br>(0.80% - 1.00%) | 0.96%<br>(0.86% - 1.07%) | 0.88%<br>(0.79% - 0.99%) | 0.84%<br>(0.75% - 0.94%) | 0.00%<br>(0.00% - 0.00%) | 0.00%<br>(0.00% - 0.00%) | 0.00%<br>(0.00% - 0.01%) | 0.00%<br>(0.00% - 0.00%) | 0.00%<br>(0.00% - 0.00%) | 0.00%<br>(0.00% - 0.00%) | 0.00%<br>(0.00% - 0.00%) | 0.00%<br>(0.00% - 0.00%) |
| Arizona                  | 0.94%<br>(0.84% - 1.05%) | 1.01%<br>(0.90% - 1.12%) | 0.88%<br>(0.79% - 0.99%) | 0.87%<br>(0.77% - 0.96%) | 0.00%<br>(0.00% - 0.00%) | 0.00%<br>(0.00% - 0.00%) | 0.00%<br>(0.00% - 0.01%) | 0.00%<br>(0.00% - 0.01%) | 0.00%<br>(0.00% - 0.00%) | 0.00%<br>(0.00% - 0.00%) | 0.00%<br>(0.00% - 0.00%) | 0.00%<br>(0.00% - 0.00%) |
| Arkansas                 | 0.98%<br>(0.87% - 1.10%) | 1.04%<br>(0.94% - 1.16%) | 0.95%<br>(0.85% - 1.06%) | 0.92%<br>(0.82% - 1.03%) | 0.00%<br>(0.00% - 0.00%) | 0.00%<br>(0.00% - 0.00%) | 0.00%<br>(0.00% - 0.00%) | 0.00%<br>(0.00% - 0.00%) | 0.00%<br>(0.00% - 0.00%) | 0.00%<br>(0.00% - 0.00%) | 0.00%<br>(0.00% - 0.00%) | 0.00%<br>(0.00% - 0.00%) |
| California               | 0.90%<br>(0.81% - 1.01%) | 0.94%<br>(0.84% - 1.05%) | 0.83%<br>(0.74% - 0.93%) | 0.80%<br>(0.72% - 0.89%) | 0.00%<br>(0.00% - 0.00%) | 0.00%<br>(0.00% - 0.00%) | 0.00%<br>(0.00% - 0.00%) | 0.00%<br>(0.00% - 0.00%) | 0.00%<br>(0.00% - 0.00%) | 0.00%<br>(0.00% - 0.00%) | 0.00%<br>(0.00% - 0.00%) | 0.00%<br>(0.00% - 0.00%) |
| Colorado                 | 0.86%<br>(0.76% - 0.96%) | 0.93%<br>(0.84% - 1.04%) | 0.85%<br>(0.75% - 0.95%) | 0.81%<br>(0.72% - 0.91%) | 0.00%<br>(0.00% - 0.00%) | 0.00%<br>(0.00% - 0.00%) | 0.00%<br>(0.00% - 0.01%) | 0.00%<br>(0.00% - 0.00%) | 0.00%<br>(0.00% - 0.00%) | 0.00%<br>(0.00% - 0.00%) | 0.00%<br>(0.00% - 0.00%) | 0.00%<br>(0.00% - 0.00%) |
| Connecticut              | 0.80%<br>(0.71% - 0.90%) | 0.86%<br>(0.76% - 0.96%) | 0.77%<br>(0.68% - 0.86%) | 0.75%<br>(0.67% - 0.85%) | 0.00%<br>(0.00% - 0.00%) | 0.00%<br>(0.00% - 0.00%) | 0.00%<br>(0.00% - 0.00%) | 0.00%<br>(0.00% - 0.00%) | 0.00%<br>(0.00% - 0.00%) | 0.00%<br>(0.00% - 0.00%) | 0.00%<br>(0.00% - 0.00%) | 0.00%<br>(0.00% - 0.00%) |
| Delaware                 | 0.88%<br>(0.78% - 0.98%) | 0.93%<br>(0.83% - 1.05%) | 0.84%<br>(0.75% - 0.95%) | 0.82%<br>(0.73% - 0.92%) | 0.00%<br>(0.00% - 0.00%) | 0.00%<br>(0.00% - 0.00%) | 0.00%<br>(0.00% - 0.00%) | 0.00%<br>(0.00% - 0.00%) | 0.00%<br>(0.00% - 0.00%) | 0.00%<br>(0.00% - 0.00%) | 0.00%<br>(0.00% - 0.00%) | 0.00%<br>(0.00% - 0.00%) |
| District of Columbia     | 1.03%<br>(0.92% - 1.16%) | 0.99%<br>(0.89% - 1.10%) | 0.88%<br>(0.79% - 0.97%) | 0.83%<br>(0.74% - 0.93%) | 0.00%<br>(0.00% - 0.00%) | 0.00%<br>(0.00% - 0.00%) | 0.00%<br>(0.00% - 0.00%) | 0.00%<br>(0.00% - 0.00%) | 0.00%<br>(0.00% - 0.00%) | 0.00%<br>(0.00% - 0.00%) | 0.00%<br>(0.00% - 0.00%) | 0.00%<br>(0.00% - 0.00%) |
| Florida                  | 0.90%<br>(0.80% - 1.01%) | 0.94%<br>(0.84% - 1.05%) | 0.85%<br>(0.76% - 0.96%) | 0.84%<br>(0.74% - 0.93%) | 0.00%<br>(0.00% - 0.00%) | 0.00%<br>(0.00% - 0.00%) | 0.00%<br>(0.00% - 0.00%) | 0.00%<br>(0.00% - 0.00%) | 0.00%<br>(0.00% - 0.00%) | 0.00%<br>(0.00% - 0.00%) | 0.00%<br>(0.00% - 0.00%) | 0.00%<br>(0.00% - 0.00%) |
| Georgia                  | 0.95%<br>(0.85% - 1.06%) | 1.00%<br>(0.90% - 1.12%) | 0.89%<br>(0.80% - 1.00%) | 0.87%<br>(0.78% - 0.98%) | 0.00%<br>(0.00% - 0.00%) | 0.00%<br>(0.00% - 0.00%) | 0.00%<br>(0.00% - 0.00%) | 0.00%<br>(0.00% - 0.00%) | 0.00%<br>(0.00% - 0.00%) | 0.00%<br>(0.00% - 0.00%) | 0.00%<br>(0.00% - 0.00%) | 0.00%<br>(0.00% - 0.00%) |
| Hawaii                   | 0.86%<br>(0.77% - 0.96%) | 0.93%<br>(0.83% - 1.04%) | 0.85%<br>(0.76% - 0.95%) | 0.83%<br>(0.74% - 0.94%) | 0.00%<br>(0.00% - 0.00%) | 0.00%<br>(0.00% - 0.00%) | 0.00%<br>(0.00% - 0.01%) | 0.00%<br>(0.00% - 0.00%) | 0.00%<br>(0.00% - 0.00%) | 0.00%<br>(0.00% - 0.00%) | 0.00%<br>(0.00% - 0.00%) | 0.00%<br>(0.00% - 0.00%) |
| Idaho                    | 0.95%<br>(0.84% - 1.06%) | 1.00%<br>(0.90% - 1.13%) | 0.90%<br>(0.80% - 1.00%) | 0.87%<br>(0.78% - 0.97%) | 0.00%<br>(0.00% - 0.00%) | 0.00%<br>(0.00% - 0.00%) | 0.00%<br>(0.00% - 0.01%) | 0.00%<br>(0.00% - 0.01%) | 0.00%<br>(0.00% - 0.00%) | 0.00%<br>(0.00% - 0.00%) | 0.00%<br>(0.00% - 0.00%) | 0.00%<br>(0.00% - 0.00%) |
| Illinois                 | 0.90%<br>(0.80% - 1.00%) | 0.94%<br>(0.84% - 1.04%) | 0.84%<br>(0.75% - 0.94%) | 0.81%<br>(0.72% - 0.91%) | 0.00%<br>(0.00% - 0.00%) | 0.00%<br>(0.00% - 0.00%) | 0.00%<br>(0.00% - 0.00%) | 0.00%<br>(0.00% - 0.00%) | 0.00%<br>(0.00% - 0.00%) | 0.00%<br>(0.00% - 0.00%) | 0.00%<br>(0.00% - 0.00%) | 0.00%<br>(0.00% - 0.00%) |
| Indiana                  | 0.92%<br>(0.82% - 1.02%) | 0.98%<br>(0.88% - 1.09%) | 0.89%<br>(0.79% - 1.01%) | 0.87%<br>(0.78% - 0.98%) | 0.00%<br>(0.00% - 0.00%) | 0.00%<br>(0.00% - 0.00%) | 0.00%<br>(0.00% - 0.01%) | 0.00%<br>(0.00% - 0.01%) | 0.00%<br>(0.00% - 0.00%) | 0.00%<br>(0.00% - 0.00%) | 0.00%<br>(0.00% - 0.00%) | 0.00%<br>(0.00% - 0.00%) |
| Iowa                     | 0.86%<br>(0.77% - 0.97%) | 0.94%<br>(0.84% - 1.06%) | 0.85%<br>(0.76% - 0.96%) | 0.82%<br>(0.73% - 0.93%) | 0.00%<br>(0.00% - 0.00%) | 0.00%<br>(0.00% - 0.00%) | 0.00%<br>(0.00% - 0.01%) | 0.00%<br>(0.00% - 0.00%) | 0.00%<br>(0.00% - 0.00%) | 0.00%<br>(0.00% - 0.00%) | 0.00%<br>(0.00% - 0.00%) | 0.00%<br>(0.00% - 0.00%) |
| Kansas                   | 0.88%<br>(0.78% - 0.99%) | 0.96%<br>(0.85% - 1.08%) | 0.88%<br>(0.78% - 0.99%) | 0.85%<br>(0.76% - 0.96%) | 0.00%<br>(0.00% - 0.00%) | 0.00%<br>(0.00% - 0.00%) | 0.00%<br>(0.00% - 0.01%) | 0.00%<br>(0.00% - 0.00%) | 0.00%<br>(0.00% - 0.00%) | 0.00%<br>(0.00% - 0.00%) | 0.00%<br>(0.00% - 0.00%) | 0.00%<br>(0.00% - 0.00%) |
| Kentucky                 | 0.93%<br>(0.84% - 1.05%) | 1.00%<br>(0.90% - 1.11%) | 0.92%<br>(0.82% - 1.02%) | 0.88%<br>(0.78% - 0.97%) | 0.00%<br>(0.00% - 0.00%) | 0.00%<br>(0.00% - 0.00%) | 0.00%<br>(0.00% - 0.01%) | 0.00%<br>(0.00% - 0.00%) | 0.00%<br>(0.00% - 0.00%) | 0.00%<br>(0.00% - 0.00%) | 0.00%<br>(0.00% - 0.00%) | 0.00%<br>(0.00% - 0.00%) |
| Louisiana                | 0.98%<br>(0.88% - 1.10%) | 1.04%<br>(0.93% - 1.16%) | 0.91%<br>(0.81% - 1.02%) | 0.89%<br>(0.79% - 0.99%) | 0.00%<br>(0.00% - 0.00%) | 0.00%<br>(0.00% - 0.00%) | 0.00%<br>(0.00% - 0.01%) | 0.00%<br>(0.00% - 0.00%) | 0.00%<br>(0.00% - 0.00%) | 0.00%<br>(0.00% - 0.00%) | 0.00%<br>(0.00% - 0.00%) | 0.00%<br>(0.00% - 0.00%) |
| Maine                    | 0.86%<br>(0.77% - 0.97%) | 0.93%<br>(0.83% - 1.05%) | 0.85%<br>(0.75% - 0.96%) | 0.83%<br>(0.74% - 0.94%) | 0.00%<br>(0.00% - 0.00%) | 0.00%<br>(0.00% - 0.00%) | 0.00%<br>(0.00% - 0.01%) | 0.00%<br>(0.00% - 0.00%) | 0.00%<br>(0.00% - 0.00%) | 0.00%<br>(0.00% - 0.00%) | 0.00%<br>(0.00% - 0.00%) | 0.00%<br>(0.00% - 0.00%) |
| Maryland                 | 0.86%<br>(0.77% - 0.97%) | 0.92%<br>(0.82% - 1.03%) | 0.82%<br>(0.73% - 0.92%) | 0.81%<br>(0.72% - 0.91%) | 0.00%<br>(0.00% - 0.00%) | 0.00%<br>(0.00% - 0.00%) | 0.00%<br>(0.00% - 0.00%) | 0.00%<br>(0.00% - 0.00%) | 0.00%<br>(0.00% - 0.00%) | 0.00%<br>(0.00% - 0.00%) | 0.00%<br>(0.00% - 0.00%) | 0.00%<br>(0.00% - 0.00%) |
| Massachusetts            | 0.80%<br>(0.72% - 0.90%) | 0.85%<br>(0.76% - 0.96%) | 0.77%<br>(0.69% - 0.87%) | 0.75%<br>(0.66% - 0.84%) | 0.00%<br>(0.00% - 0.00%) | 0.00%<br>(0.00% - 0.00%) | 0.00%<br>(0.00% - 0.01%) | 0.00%<br>(0.00% - 0.00%) | 0.00%<br>(0.00% - 0.00%) | 0.00%<br>(0.00% - 0.00%) | 0.00%<br>(0.00% - 0.00%) | 0.00%<br>(0.00% - 0.00%) |

**Table S8c. Estimated overall, severe, and extreme underweight prevalence (%) in children under 5 years, both sexes, in 1990, 2000, 2010, and 2020.**

| Location              | Total                    |                          |                          |                          | Severe                   |                          |                          |                          | Extreme                  |                          |                          |                          |
|-----------------------|--------------------------|--------------------------|--------------------------|--------------------------|--------------------------|--------------------------|--------------------------|--------------------------|--------------------------|--------------------------|--------------------------|--------------------------|
|                       | 1990                     | 2000                     | 2010                     | 2020                     | 1990                     | 2000                     | 2010                     | 2020                     | 1990                     | 2000                     | 2010                     | 2020                     |
| <i>Michigan</i>       | 0.91%<br>(0.81% - 1.01%) | 0.96%<br>(0.85% - 1.07%) | 0.88%<br>(0.79% - 0.99%) | 0.85%<br>(0.76% - 0.95%) | 0.00%<br>(0.00% - 0.00%) | 0.00%<br>(0.00% - 0.00%) | 0.00%<br>(0.00% - 0.01%) | 0.00%<br>(0.00% - 0.00%) | 0.00%<br>(0.00% - 0.00%) | 0.00%<br>(0.00% - 0.00%) | 0.00%<br>(0.00% - 0.00%) | 0.00%<br>(0.00% - 0.00%) |
| <i>Minnesota</i>      | 0.82%<br>(0.74% - 0.93%) | 0.90%<br>(0.79% - 1.01%) | 0.81%<br>(0.72% - 0.91%) | 0.78%<br>(0.69% - 0.87%) | 0.00%<br>(0.00% - 0.00%) | 0.00%<br>(0.00% - 0.00%) | 0.00%<br>(0.00% - 0.01%) | 0.00%<br>(0.00% - 0.00%) | 0.00%<br>(0.00% - 0.00%) | 0.00%<br>(0.00% - 0.00%) | 0.00%<br>(0.00% - 0.00%) | 0.00%<br>(0.00% - 0.00%) |
| <i>Mississippi</i>    | 1.00%<br>(0.90% - 1.11%) | 1.07%<br>(0.96% - 1.20%) | 0.96%<br>(0.86% - 1.06%) | 0.93%<br>(0.83% - 1.05%) | 0.00%<br>(0.00% - 0.00%) | 0.00%<br>(0.00% - 0.00%) | 0.00%<br>(0.00% - 0.00%) | 0.00%<br>(0.00% - 0.00%) | 0.00%<br>(0.00% - 0.00%) | 0.00%<br>(0.00% - 0.00%) | 0.00%<br>(0.00% - 0.00%) | 0.00%<br>(0.00% - 0.00%) |
| <i>Missouri</i>       | 0.91%<br>(0.81% - 1.01%) | 0.97%<br>(0.87% - 1.08%) | 0.89%<br>(0.79% - 1.00%) | 0.88%<br>(0.78% - 0.99%) | 0.00%<br>(0.00% - 0.00%) | 0.00%<br>(0.00% - 0.00%) | 0.00%<br>(0.00% - 0.00%) | 0.00%<br>(0.00% - 0.01%) | 0.00%<br>(0.00% - 0.00%) | 0.00%<br>(0.00% - 0.00%) | 0.00%<br>(0.00% - 0.00%) | 0.00%<br>(0.00% - 0.00%) |
| <i>Montana</i>        | 0.91%<br>(0.81% - 1.03%) | 0.98%<br>(0.87% - 1.09%) | 0.90%<br>(0.81% - 1.00%) | 0.85%<br>(0.76% - 0.96%) | 0.00%<br>(0.00% - 0.00%) | 0.00%<br>(0.00% - 0.00%) | 0.00%<br>(0.00% - 0.01%) | 0.00%<br>(0.00% - 0.00%) | 0.00%<br>(0.00% - 0.00%) | 0.00%<br>(0.00% - 0.00%) | 0.00%<br>(0.00% - 0.00%) | 0.00%<br>(0.00% - 0.00%) |
| <i>Nebraska</i>       | 0.86%<br>(0.77% - 0.97%) | 0.94%<br>(0.84% - 1.06%) | 0.85%<br>(0.76% - 0.96%) | 0.81%<br>(0.72% - 0.91%) | 0.00%<br>(0.00% - 0.00%) | 0.00%<br>(0.00% - 0.00%) | 0.00%<br>(0.00% - 0.01%) | 0.00%<br>(0.00% - 0.00%) | 0.00%<br>(0.00% - 0.00%) | 0.00%<br>(0.00% - 0.00%) | 0.00%<br>(0.00% - 0.00%) | 0.00%<br>(0.00% - 0.00%) |
| <i>Nevada</i>         | 0.95%<br>(0.85% - 1.06%) | 1.01%<br>(0.90% - 1.12%) | 0.90%<br>(0.81% - 1.00%) | 0.89%<br>(0.80% - 1.00%) | 0.00%<br>(0.00% - 0.00%) | 0.00%<br>(0.00% - 0.00%) | 0.00%<br>(0.00% - 0.01%) | 0.00%<br>(0.00% - 0.00%) | 0.00%<br>(0.00% - 0.00%) | 0.00%<br>(0.00% - 0.00%) | 0.00%<br>(0.00% - 0.00%) | 0.00%<br>(0.00% - 0.00%) |
| <i>New Hampshire</i>  | 0.82%<br>(0.73% - 0.93%) | 0.88%<br>(0.79% - 0.99%) | 0.79%<br>(0.70% - 0.89%) | 0.77%<br>(0.69% - 0.86%) | 0.00%<br>(0.00% - 0.00%) | 0.00%<br>(0.00% - 0.00%) | 0.00%<br>(0.00% - 0.00%) | 0.00%<br>(0.00% - 0.00%) | 0.00%<br>(0.00% - 0.00%) | 0.00%<br>(0.00% - 0.00%) | 0.00%<br>(0.00% - 0.00%) | 0.00%<br>(0.00% - 0.00%) |
| <i>New Jersey</i>     | 0.83%<br>(0.75% - 0.94%) | 0.89%<br>(0.78% - 0.99%) | 0.80%<br>(0.71% - 0.90%) | 0.79%<br>(0.70% - 0.89%) | 0.00%<br>(0.00% - 0.00%) | 0.00%<br>(0.00% - 0.00%) | 0.00%<br>(0.00% - 0.00%) | 0.00%<br>(0.00% - 0.00%) | 0.00%<br>(0.00% - 0.00%) | 0.00%<br>(0.00% - 0.00%) | 0.00%<br>(0.00% - 0.00%) | 0.00%<br>(0.00% - 0.00%) |
| <i>New Mexico</i>     | 0.98%<br>(0.88% - 1.11%) | 1.03%<br>(0.93% - 1.16%) | 0.93%<br>(0.83% - 1.04%) | 0.91%<br>(0.82% - 1.02%) | 0.00%<br>(0.00% - 0.00%) | 0.00%<br>(0.00% - 0.00%) | 0.00%<br>(0.00% - 0.01%) | 0.00%<br>(0.00% - 0.01%) | 0.00%<br>(0.00% - 0.00%) | 0.00%<br>(0.00% - 0.00%) | 0.00%<br>(0.00% - 0.00%) | 0.00%<br>(0.00% - 0.00%) |
| <i>New York</i>       | 0.88%<br>(0.79% - 0.98%) | 0.90%<br>(0.80% - 1.00%) | 0.82%<br>(0.73% - 0.92%) | 0.79%<br>(0.71% - 0.89%) | 0.00%<br>(0.00% - 0.00%) | 0.00%<br>(0.00% - 0.00%) | 0.00%<br>(0.00% - 0.00%) | 0.00%<br>(0.00% - 0.00%) | 0.00%<br>(0.00% - 0.00%) | 0.00%<br>(0.00% - 0.00%) | 0.00%<br>(0.00% - 0.00%) | 0.00%<br>(0.00% - 0.00%) |
| <i>North Carolina</i> | 0.93%<br>(0.84% - 1.04%) | 0.98%<br>(0.88% - 1.09%) | 0.88%<br>(0.79% - 0.99%) | 0.87%<br>(0.77% - 0.98%) | 0.00%<br>(0.00% - 0.00%) | 0.00%<br>(0.00% - 0.00%) | 0.00%<br>(0.00% - 0.00%) | 0.00%<br>(0.00% - 0.00%) | 0.00%<br>(0.00% - 0.00%) | 0.00%<br>(0.00% - 0.00%) | 0.00%<br>(0.00% - 0.00%) | 0.00%<br>(0.00% - 0.00%) |
| <i>North Dakota</i>   | 0.88%<br>(0.78% - 0.99%) | 0.94%<br>(0.83% - 1.06%) | 0.87%<br>(0.78% - 0.98%) | 0.80%<br>(0.70% - 0.89%) | 0.00%<br>(0.00% - 0.00%) | 0.00%<br>(0.00% - 0.00%) | 0.00%<br>(0.00% - 0.01%) | 0.00%<br>(0.00% - 0.00%) | 0.00%<br>(0.00% - 0.00%) | 0.00%<br>(0.00% - 0.00%) | 0.00%<br>(0.00% - 0.00%) | 0.00%<br>(0.00% - 0.00%) |
| <i>Ohio</i>           | 0.90%<br>(0.81% - 1.02%) | 0.97%<br>(0.86% - 1.08%) | 0.88%<br>(0.79% - 0.98%) | 0.88%<br>(0.78% - 0.99%) | 0.00%<br>(0.00% - 0.00%) | 0.00%<br>(0.00% - 0.00%) | 0.00%<br>(0.00% - 0.00%) | 0.00%<br>(0.00% - 0.00%) | 0.00%<br>(0.00% - 0.00%) | 0.00%<br>(0.00% - 0.00%) | 0.00%<br>(0.00% - 0.00%) | 0.00%<br>(0.00% - 0.00%) |
| <i>Oklahoma</i>       | 0.93%<br>(0.83% - 1.04%) | 1.04%<br>(0.93% - 1.15%) | 0.93%<br>(0.83% - 1.03%) | 0.88%<br>(0.79% - 0.98%) | 0.00%<br>(0.00% - 0.00%) | 0.00%<br>(0.00% - 0.00%) | 0.00%<br>(0.00% - 0.00%) | 0.00%<br>(0.00% - 0.00%) | 0.00%<br>(0.00% - 0.00%) | 0.00%<br>(0.00% - 0.00%) | 0.00%<br>(0.00% - 0.00%) | 0.00%<br>(0.00% - 0.00%) |
| <i>Oregon</i>         | 0.88%<br>(0.79% - 0.99%) | 0.94%<br>(0.84% - 1.06%) | 0.86%<br>(0.77% - 0.96%) | 0.83%<br>(0.74% - 0.93%) | 0.00%<br>(0.00% - 0.00%) | 0.00%<br>(0.00% - 0.00%) | 0.00%<br>(0.00% - 0.01%) | 0.00%<br>(0.00% - 0.01%) | 0.00%<br>(0.00% - 0.00%) | 0.00%<br>(0.00% - 0.00%) | 0.00%<br>(0.00% - 0.00%) | 0.00%<br>(0.00% - 0.00%) |
| <i>Pennsylvania</i>   | 0.88%<br>(0.79% - 0.99%) | 0.93%<br>(0.83% - 1.06%) | 0.84%<br>(0.75% - 0.95%) | 0.82%<br>(0.73% - 0.93%) | 0.00%<br>(0.00% - 0.00%) | 0.00%<br>(0.00% - 0.00%) | 0.00%<br>(0.00% - 0.00%) | 0.00%<br>(0.00% - 0.00%) | 0.00%<br>(0.00% - 0.00%) | 0.00%<br>(0.00% - 0.00%) | 0.00%<br>(0.00% - 0.00%) | 0.00%<br>(0.00% - 0.00%) |
| <i>Rhode Island</i>   | 0.84%<br>(0.75% - 0.95%) | 0.90%<br>(0.80% - 1.02%) | 0.82%<br>(0.73% - 0.93%) | 0.79%<br>(0.70% - 0.89%) | 0.00%<br>(0.00% - 0.00%) | 0.00%<br>(0.00% - 0.00%) | 0.00%<br>(0.00% - 0.01%) | 0.00%<br>(0.00% - 0.00%) | 0.00%<br>(0.00% - 0.00%) | 0.00%<br>(0.00% - 0.00%) | 0.00%<br>(0.00% - 0.00%) | 0.00%<br>(0.00% - 0.00%) |
| <i>South Carolina</i> | 0.97%<br>(0.87% - 1.09%) | 1.02%<br>(0.90% - 1.14%) | 0.92%<br>(0.83% - 1.04%) | 0.90%<br>(0.80% - 1.00%) | 0.00%<br>(0.00% - 0.00%) | 0.00%<br>(0.00% - 0.00%) | 0.00%<br>(0.00% - 0.01%) | 0.00%<br>(0.00% - 0.00%) | 0.00%<br>(0.00% - 0.00%) | 0.00%<br>(0.00% - 0.00%) | 0.00%<br>(0.00% - 0.00%) | 0.00%<br>(0.00% - 0.00%) |
| <i>South Dakota</i>   | 0.91%<br>(0.81% - 1.03%) | 0.97%<br>(0.86% - 1.08%) | 0.88%<br>(0.78% - 0.99%) | 0.85%<br>(0.77% - 0.96%) | 0.00%<br>(0.00% - 0.00%) | 0.00%<br>(0.00% - 0.00%) | 0.00%<br>(0.00% - 0.01%) | 0.00%<br>(0.00% - 0.00%) | 0.00%<br>(0.00% - 0.00%) | 0.00%<br>(0.00% - 0.00%) | 0.00%<br>(0.00% - 0.00%) | 0.00%<br>(0.00% - 0.00%) |
| <i>Tennessee</i>      | 0.95%<br>(0.85% - 1.06%) | 1.00%<br>(0.90% - 1.12%) | 0.96%<br>(0.86% - 1.08%) | 0.89%<br>(0.79% - 0.99%) | 0.00%<br>(0.00% - 0.00%) | 0.00%<br>(0.00% - 0.00%) | 0.00%<br>(0.00% - 0.01%) | 0.00%<br>(0.00% - 0.00%) | 0.00%<br>(0.00% - 0.00%) | 0.00%<br>(0.00% - 0.00%) | 0.00%<br>(0.00% - 0.00%) | 0.00%<br>(0.00% - 0.00%) |
| <i>Texas</i>          | 0.94%<br>(0.84% - 1.05%) | 1.01%<br>(0.90% - 1.12%) | 0.89%<br>(0.79% - 1.00%) | 0.86%<br>(0.77% - 0.96%) | 0.00%<br>(0.00% - 0.00%) | 0.00%<br>(0.00% - 0.00%) | 0.00%<br>(0.00% - 0.00%) | 0.00%<br>(0.00% - 0.00%) | 0.00%<br>(0.00% - 0.00%) | 0.00%<br>(0.00% - 0.00%) | 0.00%<br>(0.00% - 0.00%) | 0.00%<br>(0.00% - 0.00%) |
| <i>Utah</i>           | 0.94%<br>(0.84% - 1.06%) | 1.00%<br>(0.90% - 1.12%) | 0.89%<br>(0.79% - 1.01%) | 0.87%<br>(0.78% - 0.98%) | 0.00%<br>(0.00% - 0.00%) | 0.00%<br>(0.00% - 0.00%) | 0.00%<br>(0.00% - 0.01%) | 0.00%<br>(0.00% - 0.01%) | 0.00%<br>(0.00% - 0.00%) | 0.00%<br>(0.00% - 0.00%) | 0.00%<br>(0.00% - 0.00%) | 0.00%<br>(0.00% - 0.00%) |

**Table S8c. Estimated overall, severe, and extreme underweight prevalence (%) in children under 5 years, both sexes, in 1990, 2000, 2010, and 2020.**

| Location               | Total           |                 |                 |                 | Severe          |                 |                 |                 | Extreme         |                 |                 |                 |
|------------------------|-----------------|-----------------|-----------------|-----------------|-----------------|-----------------|-----------------|-----------------|-----------------|-----------------|-----------------|-----------------|
|                        | 1990            | 2000            | 2010            | 2020            | 1990            | 2000            | 2010            | 2020            | 1990            | 2000            | 2010            | 2020            |
| Vermont                | 0.87%           | 0.92%           | 0.82%           | 0.80%           | 0.00%           | 0.00%           | 0.00%           | 0.00%           | 0.00%           | 0.00%           | 0.00%           | 0.00%           |
|                        | (0.78% - 0.99%) | (0.81% - 1.03%) | (0.74% - 0.93%) | (0.71% - 0.91%) | (0.00% - 0.00%) | (0.00% - 0.00%) | (0.00% - 0.00%) | (0.00% - 0.00%) | (0.00% - 0.00%) | (0.00% - 0.00%) | (0.00% - 0.00%) | (0.00% - 0.00%) |
| Virginia               | 0.88%           | 0.93%           | 0.83%           | 0.81%           | 0.00%           | 0.00%           | 0.00%           | 0.00%           | 0.00%           | 0.00%           | 0.00%           | 0.00%           |
|                        | (0.79% - 0.99%) | (0.83% - 1.03%) | (0.74% - 0.93%) | (0.72% - 0.90%) | (0.00% - 0.00%) | (0.00% - 0.00%) | (0.00% - 0.00%) | (0.00% - 0.00%) | (0.00% - 0.00%) | (0.00% - 0.00%) | (0.00% - 0.00%) | (0.00% - 0.00%) |
| Washington             | 0.87%           | 0.92%           | 0.83%           | 0.80%           | 0.00%           | 0.00%           | 0.00%           | 0.00%           | 0.00%           | 0.00%           | 0.00%           | 0.00%           |
|                        | (0.77% - 0.98%) | (0.82% - 1.05%) | (0.74% - 0.94%) | (0.71% - 0.89%) | (0.00% - 0.00%) | (0.00% - 0.00%) | (0.00% - 0.01%) | (0.00% - 0.00%) | (0.00% - 0.00%) | (0.00% - 0.00%) | (0.00% - 0.00%) | (0.00% - 0.00%) |
| West Virginia          | 0.95%           | 1.02%           | 0.95%           | 0.91%           | 0.00%           | 0.00%           | 0.00%           | 0.00%           | 0.00%           | 0.00%           | 0.00%           | 0.00%           |
|                        | (0.85% - 1.07%) | (0.91% - 1.14%) | (0.85% - 1.06%) | (0.82% - 1.02%) | (0.00% - 0.00%) | (0.00% - 0.00%) | (0.00% - 0.01%) | (0.00% - 0.00%) | (0.00% - 0.00%) | (0.00% - 0.00%) | (0.00% - 0.00%) | (0.00% - 0.00%) |
| Wisconsin              | 0.85%           | 0.92%           | 0.85%           | 0.83%           | 0.00%           | 0.00%           | 0.00%           | 0.00%           | 0.00%           | 0.00%           | 0.00%           | 0.00%           |
|                        | (0.77% - 0.96%) | (0.83% - 1.03%) | (0.75% - 0.96%) | (0.74% - 0.92%) | (0.00% - 0.00%) | (0.00% - 0.00%) | (0.00% - 0.01%) | (0.00% - 0.00%) | (0.00% - 0.00%) | (0.00% - 0.00%) | (0.00% - 0.00%) | (0.00% - 0.00%) |
| Wyoming                | 0.89%           | 0.97%           | 0.86%           | 0.83%           | 0.00%           | 0.00%           | 0.00%           | 0.00%           | 0.00%           | 0.00%           | 0.00%           | 0.00%           |
|                        | (0.80% - 1.01%) | (0.87% - 1.08%) | (0.77% - 0.97%) | (0.74% - 0.93%) | (0.00% - 0.00%) | (0.00% - 0.00%) | (0.00% - 0.00%) | (0.00% - 0.00%) | (0.00% - 0.00%) | (0.00% - 0.00%) | (0.00% - 0.00%) | (0.00% - 0.00%) |
| Greenland              | 1.28%           | 1.29%           | 1.12%           | 0.98%           | 0.00%           | 0.00%           | 0.00%           | 0.00%           | 0.00%           | 0.00%           | 0.00%           | 0.00%           |
|                        | (1.18% - 1.38%) | (1.18% - 1.40%) | (1.04% - 1.21%) | (0.91% - 1.06%) | (0.00% - 0.00%) | (0.00% - 0.00%) | (0.00% - 0.00%) | (0.00% - 0.00%) | (0.00% - 0.00%) | (0.00% - 0.00%) | (0.00% - 0.00%) | (0.00% - 0.00%) |
| Southern Latin America | 2.91%           | 2.63%           | 2.15%           | 1.92%           | 0.09%           | 0.09%           | 0.06%           | 0.04%           | 0.00%           | 0.00%           | 0.00%           | 0.00%           |
|                        | (2.74% - 3.08%) | (2.48% - 2.78%) | (2.03% - 2.30%) | (1.79% - 2.08%) | (0.07% - 0.12%) | (0.07% - 0.12%) | (0.04% - 0.08%) | (0.03% - 0.07%) | (0.00% - 0.00%) | (0.00% - 0.00%) | (0.00% - 0.00%) | (0.00% - 0.00%) |
| Argentina              | 3.43%           | 2.96%           | 2.39%           | 2.21%           | 0.11%           | 0.08%           | 0.04%           | 0.04%           | 0.00%           | 0.00%           | 0.00%           | 0.00%           |
|                        | (3.18% - 3.68%) | (2.75% - 3.17%) | (2.22% - 2.58%) | (2.03% - 2.43%) | (0.07% - 0.15%) | (0.05% - 0.12%) | (0.02% - 0.08%) | (0.01% - 0.07%) | (0.00% - 0.00%) | (0.00% - 0.00%) | (0.00% - 0.00%) | (0.00% - 0.00%) |
| Chile                  | 1.31%           | 1.30%           | 1.05%           | 0.68%           | 0.00%           | 0.04%           | 0.02%           | 0.00%           | 0.00%           | 0.00%           | 0.00%           | 0.00%           |
|                        | (1.22% - 1.41%) | (1.22% - 1.40%) | (0.99% - 1.12%) | (0.63% - 0.74%) | (0.00% - 0.00%) | (0.03% - 0.05%) | (0.02% - 0.03%) | (0.00% - 0.00%) | (0.00% - 0.00%) | (0.00% - 0.00%) | (0.00% - 0.00%) | (0.00% - 0.00%) |
| Uruguay                | 4.82%           | 4.63%           | 4.21%           | 3.72%           | 0.42%           | 0.48%           | 0.42%           | 0.35%           | 0.00%           | 0.00%           | 0.00%           | 0.00%           |
|                        | (4.50% - 5.15%) | (4.32% - 4.96%) | (3.91% - 4.55%) | (3.42% - 4.02%) | (0.35% - 0.50%) | (0.40% - 0.57%) | (0.35% - 0.52%) | (0.28% - 0.43%) | (0.00% - 0.00%) | (0.00% - 0.01%) | (0.00% - 0.00%) | (0.00% - 0.00%) |
| Western Europe         | 1.30%           | 1.06%           | 1.01%           | 0.98%           | 0.02%           | 0.02%           | 0.02%           | 0.02%           | 0.00%           | 0.00%           | 0.00%           | 0.00%           |
|                        | (1.26% - 1.33%) | (1.04% - 1.09%) | (0.98% - 1.04%) | (0.95% - 1.01%) | (0.02% - 0.03%) | (0.01% - 0.02%) | (0.01% - 0.02%) | (0.01% - 0.02%) | (0.00% - 0.00%) | (0.00% - 0.00%) | (0.00% - 0.00%) | (0.00% - 0.00%) |
| Monaco                 | 0.86%           | 0.78%           | 0.81%           | 0.77%           | 0.01%           | 0.00%           | 0.01%           | 0.01%           | 0.00%           | 0.00%           | 0.00%           | 0.00%           |
|                        | (0.80% - 0.92%) | (0.73% - 0.84%) | (0.75% - 0.88%) | (0.72% - 0.83%) | (0.00% - 0.01%) | (0.00% - 0.01%) | (0.00% - 0.01%) | (0.00% - 0.01%) | (0.00% - 0.00%) | (0.00% - 0.00%) | (0.00% - 0.00%) | (0.00% - 0.00%) |
| San Marino             | 0.98%           | 0.90%           | 0.93%           | 0.97%           | 0.01%           | 0.01%           | 0.01%           | 0.01%           | 0.00%           | 0.00%           | 0.00%           | 0.00%           |
|                        | (0.91% - 1.06%) | (0.84% - 0.98%) | (0.86% - 1.00%) | (0.90% - 1.05%) | (0.01% - 0.02%) | (0.00% - 0.01%) | (0.01% - 0.02%) | (0.01% - 0.02%) | (0.00% - 0.00%) | (0.00% - 0.00%) | (0.00% - 0.00%) | (0.00% - 0.00%) |
| Andorra                | 1.00%           | 0.88%           | 0.87%           | 0.88%           | 0.01%           | 0.01%           | 0.01%           | 0.01%           | 0.00%           | 0.00%           | 0.00%           | 0.00%           |
|                        | (0.93% - 1.08%) | (0.81% - 0.96%) | (0.80% - 0.94%) | (0.81% - 0.96%) | (0.01% - 0.02%) | (0.00% - 0.01%) | (0.00% - 0.01%) | (0.01% - 0.02%) | (0.00% - 0.00%) | (0.00% - 0.00%) | (0.00% - 0.00%) | (0.00% - 0.00%) |
| Austria                | 1.31%           | 1.09%           | 1.04%           | 0.97%           | 0.02%           | 0.01%           | 0.02%           | 0.01%           | 0.00%           | 0.00%           | 0.00%           | 0.00%           |
|                        | (1.22% - 1.42%) | (1.01% - 1.17%) | (0.97% - 1.13%) | (0.90% - 1.04%) | (0.02% - 0.04%) | (0.01% - 0.02%) | (0.01% - 0.02%) | (0.01% - 0.02%) | (0.00% - 0.00%) | (0.00% - 0.00%) | (0.00% - 0.00%) | (0.00% - 0.00%) |
| Belgium                | 1.22%           | 1.05%           | 0.99%           | 0.93%           | 0.02%           | 0.01%           | 0.01%           | 0.01%           | 0.00%           | 0.00%           | 0.00%           | 0.00%           |
|                        | (1.13% - 1.31%) | (0.97% - 1.13%) | (0.91% - 1.06%) | (0.86% - 1.01%) | (0.01% - 0.03%) | (0.01% - 0.02%) | (0.01% - 0.02%) | (0.01% - 0.02%) | (0.00% - 0.00%) | (0.00% - 0.00%) | (0.00% - 0.00%) | (0.00% - 0.00%) |
| Cyprus                 | 1.67%           | 1.43%           | 1.42%           | 1.35%           | 0.04%           | 0.03%           | 0.04%           | 0.04%           | 0.00%           | 0.00%           | 0.00%           | 0.00%           |
|                        | (1.55% - 1.78%) | (1.32% - 1.54%) | (1.32% - 1.53%) | (1.25% - 1.45%) | (0.03% - 0.05%) | (0.02% - 0.04%) | (0.03% - 0.05%) | (0.03% - 0.05%) | (0.00% - 0.00%) | (0.00% - 0.00%) | (0.00% - 0.00%) | (0.00% - 0.00%) |
| Denmark                | 1.39%           | 1.16%           | 1.17%           | 1.10%           | 0.03%           | 0.02%           | 0.02%           | 0.02%           | 0.00%           | 0.00%           | 0.00%           | 0.00%           |
|                        | (1.29% - 1.49%) | (1.08% - 1.25%) | (1.08% - 1.25%) | (1.02% - 1.19%) | (0.02% - 0.04%) | (0.01% - 0.02%) | (0.02% - 0.03%) | (0.01% - 0.03%) | (0.00% - 0.00%) | (0.00% - 0.00%) | (0.00% - 0.00%) | (0.00% - 0.00%) |
| Finland                | 1.36%           | 1.21%           | 1.19%           | 1.15%           | 0.03%           | 0.02%           | 0.03%           | 0.02%           | 0.00%           | 0.00%           | 0.00%           | 0.00%           |
|                        | (1.26% - 1.47%) | (1.12% - 1.30%) | (1.11% - 1.28%) | (1.06% - 1.24%) | (0.02% - 0.04%) | (0.01% - 0.03%) | (0.02% - 0.03%) | (0.02% - 0.03%) | (0.00% - 0.00%) | (0.00% - 0.00%) | (0.00% - 0.00%) | (0.00% - 0.00%) |
| France                 | 1.21%           | 1.04%           | 1.03%           | 0.97%           | 0.02%           | 0.01%           | 0.01%           | 0.01%           | 0.00%           | 0.00%           | 0.00%           | 0.00%           |
|                        | (1.12% - 1.32%) | (0.96% - 1.12%) | (0.96% - 1.11%) | (0.90% - 1.06%) | (0.01% - 0.03%) | (0.00% - 0.02%) | (0.01% - 0.02%) | (0.01% - 0.02%) | (0.00% - 0.00%) | (0.00% - 0.00%) | (0.00% - 0.00%) | (0.00% - 0.00%) |
| Germany                | 1.57%           | 1.30%           | 1.18%           | 1.13%           | 0.04%           | 0.03%           | 0.03%           | 0.03%           | 0.00%           | 0.00%           | 0.00%           | 0.00%           |
|                        | (1.45% - 1.68%) | (1.21% - 1.40%) | (1.10% - 1.27%) | (1.05% - 1.22%) | (0.03% - 0.05%) | (0.02% - 0.04%) | (0.02% - 0.04%) | (0.02% - 0.03%) | (0.00% - 0.00%) | (0.00% - 0.00%) | (0.00% - 0.00%) | (0.00% - 0.00%) |
| Greece                 | 0.79%           | 0.73%           | 0.71%           | 0.73%           | 0.00%           | 0.00%           | 0.01%           | 0.01%           | 0.00%           | 0.00%           | 0.00%           | 0.00%           |
|                        | (0.72% - 0.87%) | (0.67% - 0.80%) | (0.65% - 0.78%) | (0.66% - 0.80%) | (0.00% - 0.00%) | (0.00% - 0.01%) | (0.00% - 0.01%) | (0.00% - 0.01%) | (0.00% - 0.00%) | (0.00% - 0.00%) | (0.00% - 0.00%) | (0.00% - 0.00%) |
|                        | 1.09%           | 1.06%           | 1.09%           | 1.04%           | 0.02%           | 0.01%           | 0.02%           | 0.02%           | 0.00%           | 0.00%           | 0.00%           | 0.00%           |

Table S8c. Estimated overall, severe, and extreme underweight prevalence (%) in children under 5 years, both sexes, in 1990, 2000, 2010, and 2020.

| Location                             | Total           |                 |                 |                 | Severe          |                 |                 |                 | Extreme         |                 |                 |                 |
|--------------------------------------|-----------------|-----------------|-----------------|-----------------|-----------------|-----------------|-----------------|-----------------|-----------------|-----------------|-----------------|-----------------|
|                                      | 1990            | 2000            | 2010            | 2020            | 1990            | 2000            | 2010            | 2020            | 1990            | 2000            | 2010            | 2020            |
| Iceland                              | (1.01% - 1.17%) | (0.99% - 1.14%) | (1.00% - 1.18%) | (0.97% - 1.13%) | (0.01% - 0.03%) | (0.01% - 0.02%) | (0.01% - 0.03%) | (0.01% - 0.03%) | (0.00% - 0.00%) | (0.00% - 0.00%) | (0.00% - 0.00%) | (0.00% - 0.00%) |
| Ireland                              | 1.20%           | 1.06%           | 0.99%           | 0.89%           | 0.02%           | 0.01%           | 0.01%           | 0.01%           | 0.00%           | 0.00%           | 0.00%           | 0.00%           |
|                                      | (1.11% - 1.30%) | (0.98% - 1.15%) | (0.93% - 1.08%) | (0.83% - 0.97%) | (0.01% - 0.03%) | (0.00% - 0.02%) | (0.01% - 0.02%) | (0.01% - 0.02%) | (0.00% - 0.00%) | (0.00% - 0.00%) | (0.00% - 0.00%) | (0.00% - 0.00%) |
| Israel                               | 1.08%           | 0.93%           | 0.93%           | 0.88%           | 0.01%           | 0.01%           | 0.01%           | 0.01%           | 0.00%           | 0.00%           | 0.00%           | 0.00%           |
|                                      | (1.00% - 1.16%) | (0.86% - 1.01%) | (0.86% - 1.00%) | (0.82% - 0.96%) | (0.01% - 0.02%) | (0.00% - 0.01%) | (0.00% - 0.01%) | (0.00% - 0.01%) | (0.00% - 0.00%) | (0.00% - 0.00%) | (0.00% - 0.00%) | (0.00% - 0.00%) |
| Italy                                | 1.23%           | 0.98%           | 0.94%           | 0.91%           | 0.02%           | 0.01%           | 0.01%           | 0.01%           | 0.00%           | 0.00%           | 0.00%           | 0.00%           |
|                                      | (1.15% - 1.33%) | (0.91% - 1.06%) | (0.87% - 1.00%) | (0.84% - 0.98%) | (0.01% - 0.03%) | (0.00% - 0.02%) | (0.01% - 0.02%) | (0.01% - 0.02%) | (0.00% - 0.00%) | (0.00% - 0.00%) | (0.00% - 0.00%) | (0.00% - 0.00%) |
| <i>Piemonte</i>                      | 1.16%           | 0.95%           | 0.91%           | 0.89%           | 0.02%           | 0.01%           | 0.01%           | 0.01%           | 0.00%           | 0.00%           | 0.00%           | 0.00%           |
|                                      | (1.04% - 1.29%) | (0.85% - 1.06%) | (0.82% - 1.01%) | (0.80% - 0.99%) | (0.01% - 0.03%) | (0.00% - 0.02%) | (0.00% - 0.02%) | (0.00% - 0.02%) | (0.00% - 0.00%) | (0.00% - 0.00%) | (0.00% - 0.00%) | (0.00% - 0.00%) |
| <i>Valle d'Aosta</i>                 | 1.16%           | 0.95%           | 0.91%           | 0.89%           | 0.02%           | 0.01%           | 0.01%           | 0.01%           | 0.00%           | 0.00%           | 0.00%           | 0.00%           |
|                                      | (1.04% - 1.29%) | (0.85% - 1.05%) | (0.82% - 1.01%) | (0.79% - 0.97%) | (0.01% - 0.03%) | (0.00% - 0.02%) | (0.00% - 0.02%) | (0.00% - 0.02%) | (0.00% - 0.00%) | (0.00% - 0.00%) | (0.00% - 0.00%) | (0.00% - 0.00%) |
| <i>Liguria</i>                       | 1.16%           | 0.95%           | 0.91%           | 0.89%           | 0.02%           | 0.01%           | 0.01%           | 0.01%           | 0.00%           | 0.00%           | 0.00%           | 0.00%           |
|                                      | (1.05% - 1.30%) | (0.85% - 1.05%) | (0.82% - 1.01%) | (0.79% - 0.98%) | (0.01% - 0.03%) | (0.00% - 0.02%) | (0.00% - 0.02%) | (0.00% - 0.02%) | (0.00% - 0.00%) | (0.00% - 0.00%) | (0.00% - 0.00%) | (0.00% - 0.00%) |
| <i>Lombardia</i>                     | 1.10%           | 0.90%           | 0.87%           | 0.85%           | 0.02%           | 0.01%           | 0.01%           | 0.01%           | 0.00%           | 0.00%           | 0.00%           | 0.00%           |
|                                      | (1.00% - 1.22%) | (0.82% - 1.00%) | (0.79% - 0.96%) | (0.77% - 0.93%) | (0.01% - 0.03%) | (0.00% - 0.01%) | (0.00% - 0.02%) | (0.00% - 0.02%) | (0.00% - 0.00%) | (0.00% - 0.00%) | (0.00% - 0.00%) | (0.00% - 0.00%) |
| <i>Provincia autonoma di Bolzano</i> | 1.11%           | 0.90%           | 0.88%           | 0.85%           | 0.02%           | 0.01%           | 0.01%           | 0.01%           | 0.00%           | 0.00%           | 0.00%           | 0.00%           |
|                                      | (1.01% - 1.23%) | (0.81% - 1.00%) | (0.78% - 0.97%) | (0.77% - 0.95%) | (0.01% - 0.03%) | (0.00% - 0.02%) | (0.00% - 0.02%) | (0.00% - 0.02%) | (0.00% - 0.00%) | (0.00% - 0.00%) | (0.00% - 0.00%) | (0.00% - 0.00%) |
| <i>Provincia autonoma di Trento</i>  | 1.09%           | 0.91%           | 0.88%           | 0.86%           | 0.02%           | 0.01%           | 0.01%           | 0.01%           | 0.00%           | 0.00%           | 0.00%           | 0.00%           |
|                                      | (0.98% - 1.21%) | (0.81% - 1.01%) | (0.80% - 0.99%) | (0.77% - 0.96%) | (0.01% - 0.03%) | (0.00% - 0.02%) | (0.00% - 0.02%) | (0.00% - 0.02%) | (0.00% - 0.00%) | (0.00% - 0.00%) | (0.00% - 0.00%) | (0.00% - 0.00%) |
| <i>Veneto</i>                        | 1.14%           | 0.90%           | 0.87%           | 0.85%           | 0.02%           | 0.01%           | 0.01%           | 0.01%           | 0.00%           | 0.00%           | 0.00%           | 0.00%           |
|                                      | (1.03% - 1.26%) | (0.83% - 1.03%) | (0.80% - 0.99%) | (0.79% - 0.96%) | (0.01% - 0.03%) | (0.00% - 0.02%) | (0.00% - 0.02%) | (0.00% - 0.02%) | (0.00% - 0.00%) | (0.00% - 0.00%) | (0.00% - 0.00%) | (0.00% - 0.00%) |
| <i>Friuli-Venezia Giulia</i>         | 1.17%           | 0.95%           | 0.91%           | 0.88%           | 0.02%           | 0.01%           | 0.01%           | 0.01%           | 0.00%           | 0.00%           | 0.00%           | 0.00%           |
|                                      | (1.05% - 1.31%) | (0.85% - 1.06%) | (0.80% - 1.01%) | (0.79% - 0.98%) | (0.01% - 0.03%) | (0.00% - 0.02%) | (0.00% - 0.02%) | (0.00% - 0.02%) | (0.00% - 0.00%) | (0.00% - 0.00%) | (0.00% - 0.00%) | (0.00% - 0.00%) |
| <i>Emilia-Romagna</i>                | 1.18%           | 0.93%           | 0.89%           | 0.86%           | 0.02%           | 0.01%           | 0.01%           | 0.01%           | 0.00%           | 0.00%           | 0.00%           | 0.00%           |
|                                      | (1.06% - 1.31%) | (0.84% - 1.02%) | (0.80% - 0.99%) | (0.77% - 0.96%) | (0.01% - 0.03%) | (0.00% - 0.02%) | (0.00% - 0.02%) | (0.00% - 0.02%) | (0.00% - 0.00%) | (0.00% - 0.00%) | (0.00% - 0.00%) | (0.00% - 0.00%) |
| <i>Toscana</i>                       | 1.15%           | 0.94%           | 0.91%           | 0.88%           | 0.02%           | 0.01%           | 0.01%           | 0.01%           | 0.00%           | 0.00%           | 0.00%           | 0.00%           |
|                                      | (1.03% - 1.27%) | (0.86% - 1.05%) | (0.82% - 1.01%) | (0.79% - 0.99%) | (0.01% - 0.03%) | (0.00% - 0.02%) | (0.00% - 0.02%) | (0.00% - 0.02%) | (0.00% - 0.00%) | (0.00% - 0.00%) | (0.00% - 0.00%) | (0.00% - 0.00%) |
| <i>Umbria</i>                        | 1.17%           | 0.96%           | 0.93%           | 0.92%           | 0.02%           | 0.01%           | 0.01%           | 0.01%           | 0.00%           | 0.00%           | 0.00%           | 0.00%           |
|                                      | (1.04% - 1.31%) | (0.86% - 1.07%) | (0.83% - 1.04%) | (0.82% - 1.02%) | (0.01% - 0.03%) | (0.00% - 0.02%) | (0.00% - 0.02%) | (0.00% - 0.02%) | (0.00% - 0.00%) | (0.00% - 0.00%) | (0.00% - 0.00%) | (0.00% - 0.00%) |
| <i>Marche</i>                        | 1.19%           | 0.96%           | 0.92%           | 0.90%           | 0.02%           | 0.01%           | 0.01%           | 0.01%           | 0.00%           | 0.00%           | 0.00%           | 0.00%           |
|                                      | (1.07% - 1.32%) | (0.86% - 1.06%) | (0.83% - 1.03%) | (0.81% - 1.00%) | (0.01% - 0.03%) | (0.00% - 0.02%) | (0.00% - 0.02%) | (0.00% - 0.02%) | (0.00% - 0.00%) | (0.00% - 0.00%) | (0.00% - 0.00%) | (0.00% - 0.00%) |
| <i>Lazio</i>                         | 1.13%           | 0.93%           | 0.89%           | 0.87%           | 0.02%           | 0.01%           | 0.01%           | 0.01%           | 0.00%           | 0.00%           | 0.00%           | 0.00%           |
|                                      | (1.02% - 1.26%) | (0.84% - 1.02%) | (0.81% - 0.99%) | (0.79% - 0.97%) | (0.01% - 0.03%) | (0.00% - 0.02%) | (0.00% - 0.02%) | (0.00% - 0.02%) | (0.00% - 0.00%) | (0.00% - 0.00%) | (0.00% - 0.00%) | (0.00% - 0.00%) |
| <i>Abruzzo</i>                       | 1.19%           | 0.97%           | 0.95%           | 0.92%           | 0.02%           | 0.01%           | 0.01%           | 0.01%           | 0.00%           | 0.00%           | 0.00%           | 0.00%           |
|                                      | (1.08% - 1.33%) | (0.86% - 1.09%) | (0.85% - 1.06%) | (0.82% - 1.03%) | (0.01% - 0.03%) | (0.00% - 0.02%) | (0.00% - 0.02%) | (0.00% - 0.02%) | (0.00% - 0.00%) | (0.00% - 0.00%) | (0.00% - 0.00%) | (0.00% - 0.00%) |
| <i>Molise</i>                        | 1.27%           | 1.01%           | 0.98%           | 0.96%           | 0.02%           | 0.01%           | 0.01%           | 0.01%           | 0.00%           | 0.00%           | 0.00%           | 0.00%           |
|                                      | (1.13% - 1.41%) | (0.91% - 1.13%) | (0.87% - 1.10%) | (0.86% - 1.08%) | (0.01% - 0.03%) | (0.00% - 0.02%) | (0.00% - 0.02%) | (0.01% - 0.02%) | (0.00% - 0.00%) | (0.00% - 0.00%) | (0.00% - 0.00%) | (0.00% - 0.00%) |
| <i>Campania</i>                      | 1.37%           | 1.08%           | 1.02%           | 1.00%           | 0.02%           | 0.01%           | 0.01%           | 0.01%           | 0.00%           | 0.00%           | 0.00%           | 0.00%           |
|                                      | (1.24% - 1.51%) | (0.98% - 1.19%) | (0.92% - 1.13%) | (0.90% - 1.11%) | (0.01% - 0.04%) | (0.00% - 0.02%) | (0.01% - 0.02%) | (0.01% - 0.02%) | (0.00% - 0.00%) | (0.00% - 0.00%) | (0.00% - 0.00%) | (0.00% - 0.00%) |
| <i>Puglia</i>                        | 1.34%           | 1.06%           | 1.01%           | 0.99%           | 0.02%           | 0.01%           | 0.01%           | 0.01%           | 0.00%           | 0.00%           | 0.00%           | 0.00%           |
|                                      | (1.21% - 1.48%) | (0.96% - 1.17%) | (0.91% - 1.12%) | (0.89% - 1.10%) | (0.01% - 0.04%) | (0.00% - 0.02%) | (0.01% - 0.02%) | (0.01% - 0.02%) | (0.00% - 0.00%) | (0.00% - 0.00%) | (0.00% - 0.00%) | (0.00% - 0.00%) |
| <i>Basilicata</i>                    | 1.30%           | 1.03%           | 0.99%           | 0.97%           | 0.02%           | 0.01%           | 0.01%           | 0.01%           | 0.00%           | 0.00%           | 0.00%           | 0.00%           |
|                                      | (1.16% - 1.44%) | (0.93% - 1.15%) | (0.89% - 1.11%) | (0.86% - 1.08%) | (0.01% - 0.03%) | (0.00% - 0.02%) | (0.01% - 0.02%) | (0.01% - 0.02%) | (0.00% - 0.00%) | (0.00% - 0.00%) | (0.00% - 0.00%) | (0.00% - 0.00%) |
| <i>Calabria</i>                      | 1.34%           | 1.07%           | 1.02%           | 1.00%           | 0.02%           | 0.01%           | 0.01%           | 0.01%           | 0.00%           | 0.00%           | 0.00%           | 0.00%           |
|                                      | (1.21% - 1.49%) | (0.95% - 1.19%) | (0.91% - 1.15%) | (0.90% - 1.12%) | (0.01% - 0.04%) | (0.00% - 0.02%) | (0.01% - 0.03%) | (0.01% - 0.02%) | (0.00% - 0.00%) | (0.00% - 0.00%) | (0.00% - 0.00%) | (0.00% - 0.00%) |
| <i>Sicilia</i>                       | 1.38%           | 1.08%           | 1.02%           | 1.01%           | 0.02%           | 0.01%           | 0.01%           | 0.01%           | 0.00%           | 0.00%           | 0.00%           | 0.00%           |
|                                      | (1.25% - 1.51%) | (0.98% - 1.19%) | (0.92% - 1.13%) | (0.90% - 1.12%) | (0.01% - 0.04%) | (0.00% - 0.02%) | (0.01% - 0.02%) | (0.01% - 0.02%) | (0.00% - 0.00%) | (0.00% - 0.00%) | (0.00% - 0.00%) | (0.00% - 0.00%) |

Table S8c. Estimated overall, severe, and extreme underweight prevalence (%) in children under 5 years, both sexes, in 1990, 2000, 2010, and 2020.

| Location                        | Total                    |                          |                          |                          | Severe                   |                          |                          |                          | Extreme                  |                          |                          |                          |
|---------------------------------|--------------------------|--------------------------|--------------------------|--------------------------|--------------------------|--------------------------|--------------------------|--------------------------|--------------------------|--------------------------|--------------------------|--------------------------|
|                                 | 1990                     | 2000                     | 2010                     | 2020                     | 1990                     | 2000                     | 2010                     | 2020                     | 1990                     | 2000                     | 2010                     | 2020                     |
| <i>Sardegna</i>                 | 1.27%<br>(1.14% - 1.42%) | 1.03%<br>(0.93% - 1.14%) | 0.99%<br>(0.89% - 1.10%) | 0.96%<br>(0.86% - 1.07%) | 0.02%<br>(0.01% - 0.03%) | 0.01%<br>(0.00% - 0.02%) | 0.01%<br>(0.01% - 0.02%) | 0.01%<br>(0.01% - 0.02%) | 0.00%<br>(0.00% - 0.00%) | 0.00%<br>(0.00% - 0.00%) | 0.00%<br>(0.00% - 0.00%) | 0.00%<br>(0.00% - 0.00%) |
| Luxembourg                      | 1.45%<br>(1.35% - 1.57%) | 1.28%<br>(1.19% - 1.38%) | 1.27%<br>(1.18% - 1.37%) | 1.17%<br>(1.09% - 1.26%) | 0.03%<br>(0.02% - 0.05%) | 0.02%<br>(0.02% - 0.03%) | 0.03%<br>(0.02% - 0.04%) | 0.03%<br>(0.02% - 0.04%) | 0.00%<br>(0.00% - 0.00%) | 0.00%<br>(0.00% - 0.00%) | 0.00%<br>(0.00% - 0.00%) | 0.00%<br>(0.00% - 0.00%) |
| Malta                           | 1.45%<br>(1.35% - 1.57%) | 1.23%<br>(1.14% - 1.32%) | 1.25%<br>(1.16% - 1.34%) | 1.09%<br>(1.02% - 1.18%) | 0.03%<br>(0.02% - 0.04%) | 0.02%<br>(0.01% - 0.02%) | 0.03%<br>(0.02% - 0.04%) | 0.02%<br>(0.01% - 0.03%) | 0.00%<br>(0.00% - 0.00%) | 0.00%<br>(0.00% - 0.00%) | 0.00%<br>(0.00% - 0.00%) | 0.00%<br>(0.00% - 0.00%) |
| Netherlands                     | 0.90%<br>(0.84% - 0.97%) | 0.86%<br>(0.80% - 0.92%) | 0.81%<br>(0.75% - 0.86%) | 0.78%<br>(0.72% - 0.84%) | 0.04%<br>(0.03% - 0.06%) | 0.04%<br>(0.03% - 0.05%) | 0.04%<br>(0.03% - 0.05%) | 0.04%<br>(0.03% - 0.05%) | 0.00%<br>(0.00% - 0.00%) | 0.00%<br>(0.00% - 0.00%) | 0.00%<br>(0.00% - 0.00%) | 0.00%<br>(0.00% - 0.00%) |
| Norway                          | 1.22%<br>(1.14% - 1.30%) | 1.05%<br>(0.97% - 1.12%) | 1.07%<br>(0.99% - 1.15%) | 1.01%<br>(0.94% - 1.08%) | 0.02%<br>(0.02% - 0.03%) | 0.01%<br>(0.01% - 0.02%) | 0.02%<br>(0.01% - 0.03%) | 0.02%<br>(0.01% - 0.03%) | 0.00%<br>(0.00% - 0.00%) | 0.00%<br>(0.00% - 0.00%) | 0.00%<br>(0.00% - 0.00%) | 0.00%<br>(0.00% - 0.00%) |
| Portugal                        | 1.50%<br>(1.40% - 1.61%) | 1.25%<br>(1.16% - 1.34%) | 1.18%<br>(1.10% - 1.27%) | 1.12%<br>(1.03% - 1.21%) | 0.02%<br>(0.02% - 0.03%) | 0.01%<br>(0.01% - 0.02%) | 0.02%<br>(0.01% - 0.03%) | 0.02%<br>(0.01% - 0.03%) | 0.00%<br>(0.00% - 0.00%) | 0.00%<br>(0.00% - 0.00%) | 0.00%<br>(0.00% - 0.00%) | 0.00%<br>(0.00% - 0.00%) |
| Spain                           | 1.32%<br>(1.20% - 1.45%) | 0.81%<br>(0.74% - 0.90%) | 0.75%<br>(0.68% - 0.83%) | 0.73%<br>(0.66% - 0.81%) | 0.00%<br>(0.00% - 0.00%) | 0.00%<br>(0.00% - 0.00%) | 0.00%<br>(0.00% - 0.00%) | 0.00%<br>(0.00% - 0.00%) | 0.00%<br>(0.00% - 0.00%) | 0.00%<br>(0.00% - 0.00%) | 0.00%<br>(0.00% - 0.00%) | 0.00%<br>(0.00% - 0.00%) |
| Sweden                          | 1.23%<br>(1.15% - 1.33%) | 1.08%<br>(0.99% - 1.16%) | 1.05%<br>(0.97% - 1.13%) | 1.00%<br>(0.92% - 1.07%) | 0.03%<br>(0.02% - 0.04%) | 0.02%<br>(0.01% - 0.02%) | 0.02%<br>(0.01% - 0.03%) | 0.02%<br>(0.01% - 0.02%) | 0.00%<br>(0.00% - 0.00%) | 0.00%<br>(0.00% - 0.00%) | 0.00%<br>(0.00% - 0.00%) | 0.00%<br>(0.00% - 0.00%) |
| <i>Sweden except Stockholm</i>  | 1.22%<br>(1.13% - 1.32%) | 1.06%<br>(0.97% - 1.15%) | 1.04%<br>(0.95% - 1.12%) | 0.98%<br>(0.91% - 1.06%) | 0.02%<br>(0.02% - 0.04%) | 0.01%<br>(0.01% - 0.02%) | 0.02%<br>(0.01% - 0.03%) | 0.02%<br>(0.01% - 0.02%) | 0.00%<br>(0.00% - 0.00%) | 0.00%<br>(0.00% - 0.00%) | 0.00%<br>(0.00% - 0.00%) | 0.00%<br>(0.00% - 0.00%) |
| <i>Stockholm</i>                | 1.29%<br>(1.17% - 1.44%) | 1.13%<br>(1.02% - 1.27%) | 1.09%<br>(0.98% - 1.22%) | 1.04%<br>(0.93% - 1.15%) | 0.03%<br>(0.02% - 0.05%) | 0.02%<br>(0.01% - 0.03%) | 0.02%<br>(0.01% - 0.04%) | 0.02%<br>(0.01% - 0.03%) | 0.00%<br>(0.00% - 0.00%) | 0.00%<br>(0.00% - 0.00%) | 0.00%<br>(0.00% - 0.00%) | 0.00%<br>(0.00% - 0.00%) |
| Switzerland                     | 1.12%<br>(1.04% - 1.21%) | 1.02%<br>(0.95% - 1.10%) | 1.02%<br>(0.94% - 1.10%) | 0.98%<br>(0.91% - 1.06%) | 0.02%<br>(0.01% - 0.03%) | 0.01%<br>(0.01% - 0.02%) | 0.02%<br>(0.01% - 0.03%) | 0.02%<br>(0.01% - 0.03%) | 0.00%<br>(0.00% - 0.00%) | 0.00%<br>(0.00% - 0.00%) | 0.00%<br>(0.00% - 0.00%) | 0.00%<br>(0.00% - 0.00%) |
| United Kingdom                  | 1.31%<br>(1.23% - 1.40%) | 1.10%<br>(1.03% - 1.18%) | 1.09%<br>(1.02% - 1.17%) | 1.04%<br>(0.97% - 1.12%) | 0.03%<br>(0.02% - 0.04%) | 0.01%<br>(0.01% - 0.02%) | 0.02%<br>(0.01% - 0.03%) | 0.02%<br>(0.01% - 0.02%) | 0.00%<br>(0.00% - 0.00%) | 0.00%<br>(0.00% - 0.00%) | 0.00%<br>(0.00% - 0.00%) | 0.00%<br>(0.00% - 0.00%) |
| Northern Ireland                | 1.37%<br>(1.22% - 1.54%) | 1.12%<br>(0.99% - 1.26%) | 1.15%<br>(1.01% - 1.29%) | 1.08%<br>(0.95% - 1.21%) | 0.03%<br>(0.01% - 0.04%) | 0.01%<br>(0.00% - 0.02%) | 0.02%<br>(0.01% - 0.04%) | 0.02%<br>(0.01% - 0.03%) | 0.00%<br>(0.00% - 0.00%) | 0.00%<br>(0.00% - 0.00%) | 0.00%<br>(0.00% - 0.00%) | 0.00%<br>(0.00% - 0.00%) |
| Scotland                        | 1.34%<br>(1.19% - 1.51%) | 1.10%<br>(0.97% - 1.24%) | 1.12%<br>(0.99% - 1.26%) | 1.07%<br>(0.95% - 1.20%) | 0.02%<br>(0.01% - 0.04%) | 0.01%<br>(0.00% - 0.02%) | 0.02%<br>(0.01% - 0.03%) | 0.02%<br>(0.01% - 0.03%) | 0.00%<br>(0.00% - 0.00%) | 0.00%<br>(0.00% - 0.00%) | 0.00%<br>(0.00% - 0.00%) | 0.00%<br>(0.00% - 0.00%) |
| Wales                           | 1.42%<br>(1.26% - 1.59%) | 1.16%<br>(1.03% - 1.31%) | 1.17%<br>(1.04% - 1.32%) | 1.10%<br>(0.97% - 1.22%) | 0.03%<br>(0.02% - 0.05%) | 0.01%<br>(0.01% - 0.03%) | 0.02%<br>(0.01% - 0.04%) | 0.02%<br>(0.01% - 0.03%) | 0.00%<br>(0.00% - 0.00%) | 0.00%<br>(0.00% - 0.00%) | 0.00%<br>(0.00% - 0.00%) | 0.00%<br>(0.00% - 0.00%) |
| England                         | 1.30%<br>(1.22% - 1.39%) | 1.10%<br>(1.02% - 1.18%) | 1.09%<br>(1.01% - 1.17%) | 1.03%<br>(0.96% - 1.11%) | 0.03%<br>(0.02% - 0.03%) | 0.01%<br>(0.01% - 0.02%) | 0.02%<br>(0.01% - 0.03%) | 0.02%<br>(0.01% - 0.02%) | 0.00%<br>(0.00% - 0.00%) | 0.00%<br>(0.00% - 0.00%) | 0.00%<br>(0.00% - 0.00%) | 0.00%<br>(0.00% - 0.00%) |
| <i>North East England</i>       | 1.41%<br>(1.26% - 1.56%) | 1.16%<br>(1.03% - 1.29%) | 1.14%<br>(1.02% - 1.26%) | 1.08%<br>(0.97% - 1.21%) | 0.03%<br>(0.02% - 0.04%) | 0.01%<br>(0.01% - 0.03%) | 0.02%<br>(0.01% - 0.03%) | 0.02%<br>(0.01% - 0.03%) | 0.00%<br>(0.00% - 0.00%) | 0.00%<br>(0.00% - 0.00%) | 0.00%<br>(0.00% - 0.00%) | 0.00%<br>(0.00% - 0.00%) |
| <i>North West England</i>       | 1.34%<br>(1.21% - 1.48%) | 1.12%<br>(1.01% - 1.25%) | 1.12%<br>(1.02% - 1.23%) | 1.06%<br>(0.96% - 1.17%) | 0.03%<br>(0.01% - 0.04%) | 0.01%<br>(0.01% - 0.02%) | 0.02%<br>(0.01% - 0.03%) | 0.02%<br>(0.01% - 0.03%) | 0.00%<br>(0.00% - 0.00%) | 0.00%<br>(0.00% - 0.00%) | 0.00%<br>(0.00% - 0.00%) | 0.00%<br>(0.00% - 0.00%) |
| <i>Yorkshire and the Humber</i> | 1.34%<br>(1.22% - 1.47%) | 1.13%<br>(1.02% - 1.25%) | 1.12%<br>(1.02% - 1.24%) | 1.07%<br>(0.97% - 1.18%) | 0.03%<br>(0.01% - 0.04%) | 0.01%<br>(0.01% - 0.02%) | 0.02%<br>(0.01% - 0.03%) | 0.02%<br>(0.01% - 0.03%) | 0.00%<br>(0.00% - 0.00%) | 0.00%<br>(0.00% - 0.00%) | 0.00%<br>(0.00% - 0.00%) | 0.00%<br>(0.00% - 0.00%) |
| <i>East Midlands</i>            | 1.32%<br>(1.19% - 1.45%) | 1.10%<br>(1.00% - 1.22%) | 1.11%<br>(1.00% - 1.22%) | 1.05%<br>(0.95% - 1.17%) | 0.03%<br>(0.01% - 0.04%) | 0.01%<br>(0.01% - 0.02%) | 0.02%<br>(0.01% - 0.03%) | 0.02%<br>(0.01% - 0.03%) | 0.00%<br>(0.00% - 0.00%) | 0.00%<br>(0.00% - 0.00%) | 0.00%<br>(0.00% - 0.00%) | 0.00%<br>(0.00% - 0.00%) |
| <i>West Midlands</i>            | 1.37%<br>(1.24% - 1.51%) | 1.15%<br>(1.05% - 1.27%) | 1.13%<br>(1.03% - 1.24%) | 1.08%<br>(0.97% - 1.19%) | 0.03%<br>(0.01% - 0.04%) | 0.01%<br>(0.01% - 0.02%) | 0.02%<br>(0.01% - 0.03%) | 0.02%<br>(0.01% - 0.03%) | 0.00%<br>(0.00% - 0.00%) | 0.00%<br>(0.00% - 0.00%) | 0.00%<br>(0.00% - 0.00%) | 0.00%<br>(0.00% - 0.00%) |
| <i>East of England</i>          | 1.26%<br>(1.15% - 1.39%) | 1.06%<br>(0.96% - 1.18%) | 1.07%<br>(0.97% - 1.18%) | 1.02%<br>(0.91% - 1.12%) | 0.02%<br>(0.01% - 0.04%) | 0.01%<br>(0.01% - 0.02%) | 0.02%<br>(0.01% - 0.03%) | 0.02%<br>(0.01% - 0.03%) | 0.00%<br>(0.00% - 0.00%) | 0.00%<br>(0.00% - 0.00%) | 0.00%<br>(0.00% - 0.00%) | 0.00%<br>(0.00% - 0.00%) |
| <i>Greater London</i>           | 1.25%<br>(1.15% - 1.38%) | 1.07%<br>(0.96% - 1.18%) | 1.03%<br>(0.94% - 1.13%) | 0.97%<br>(0.88% - 1.06%) | 0.02%<br>(0.01% - 0.04%) | 0.01%<br>(0.01% - 0.02%) | 0.02%<br>(0.01% - 0.03%) | 0.01%<br>(0.01% - 0.02%) | 0.00%<br>(0.00% - 0.00%) | 0.00%<br>(0.00% - 0.00%) | 0.00%<br>(0.00% - 0.00%) | 0.00%<br>(0.00% - 0.00%) |

Table S8c. Estimated overall, severe, and extreme underweight prevalence (%) in children under 5 years, both sexes, in 1990, 2000, 2010, and 2020.

| Location                                | Total             |                   |                   |                   | Severe          |                 |                 |                 | Extreme         |                 |                 |                 |
|-----------------------------------------|-------------------|-------------------|-------------------|-------------------|-----------------|-----------------|-----------------|-----------------|-----------------|-----------------|-----------------|-----------------|
|                                         | 1990              | 2000              | 2010              | 2020              | 1990            | 2000            | 2010            | 2020            | 1990            | 2000            | 2010            | 2020            |
|                                         | 1.23%             | 1.05%             | 1.05%             | 1.01%             | 0.02%           | 0.01%           | 0.02%           | 0.02%           | 0.00%           | 0.00%           | 0.00%           | 0.00%           |
| <i>South East England</i>               | (1.11% - 1.35%)   | (0.95% - 1.16%)   | (0.95% - 1.16%)   | (0.92% - 1.12%)   | (0.01% - 0.04%) | (0.01% - 0.02%) | (0.01% - 0.03%) | (0.01% - 0.03%) | (0.00% - 0.00%) | (0.00% - 0.00%) | (0.00% - 0.00%) | (0.00% - 0.00%) |
|                                         | 1.29%             | 1.09%             | 1.05%             | 1.05%             | 0.03%           | 0.01%           | 0.02%           | 0.02%           | 0.00%           | 0.00%           | 0.00%           | 0.00%           |
| <i>South West England</i>               | (1.17% - 1.42%)   | (0.97% - 1.21%)   | (1.00% - 1.21%)   | (0.95% - 1.15%)   | (0.01% - 0.04%) | (0.01% - 0.02%) | (0.01% - 0.03%) | (0.01% - 0.03%) | (0.00% - 0.00%) | (0.00% - 0.00%) | (0.00% - 0.00%) | (0.00% - 0.00%) |
| <b>Latin America and Caribbean</b>      | 7.59%             | 6.00%             | 4.83%             | 4.41%             | 1.22%           | 0.86%           | 0.59%           | 0.53%           | 0.09%           | 0.06%           | 0.03%           | 0.02%           |
|                                         | (7.52% - 7.67%)   | (5.94% - 6.06%)   | (4.77% - 4.88%)   | (4.35% - 4.47%)   | (1.19% - 1.26%) | (0.83% - 0.89%) | (0.57% - 0.61%) | (0.50% - 0.55%) | (0.08% - 0.10%) | (0.05% - 0.07%) | (0.02% - 0.03%) | (0.02% - 0.03%) |
|                                         | 9.24%             | 7.04%             | 5.26%             | 4.35%             | 1.47%           | 0.91%           | 0.52%           | 0.40%           | 0.05%           | 0.02%           | 0.00%           | 0.00%           |
| <b>Andean Latin America</b>             | (8.96% - 9.51%)   | (6.81% - 7.26%)   | (5.08% - 5.43%)   | (4.17% - 4.54%)   | (1.36% - 1.58%) | (0.84% - 0.98%) | (0.47% - 0.57%) | (0.35% - 0.45%) | (0.04% - 0.06%) | (0.01% - 0.03%) | (0.00% - 0.01%) | (0.00% - 0.00%) |
|                                         | 10.13%            | 7.37%             | 5.23%             | 4.27%             | 1.95%           | 1.02%           | 0.55%           | 0.41%           | 0.07%           | 0.01%           | 0.00%           | 0.00%           |
| <i>Bolivia (Plurinational State of)</i> | (9.73% - 10.55%)  | (6.98% - 7.80%)   | (4.90% - 5.60%)   | (3.97% - 4.59%)   | (1.78% - 2.14%) | (0.89% - 1.17%) | (0.46% - 0.64%) | (0.33% - 0.50%) | (0.05% - 0.10%) | (0.00% - 0.03%) | (0.00% - 0.01%) | (0.00% - 0.00%) |
|                                         | 11.74%            | 8.92%             | 6.71%             | 5.92%             | 2.17%           | 1.39%           | 0.80%           | 0.68%           | 0.13%           | 0.06%           | 0.01%           | 0.00%           |
| <i>Ecuador</i>                          | (11.12% - 12.40%) | (8.41% - 9.44%)   | (6.30% - 7.16%)   | (5.50% - 6.37%)   | (1.89% - 2.47%) | (1.21% - 1.59%) | (0.66% - 0.95%) | (0.55% - 0.81%) | (0.09% - 0.17%) | (0.04% - 0.09%) | (0.00% - 0.02%) | (0.00% - 0.01%) |
|                                         | 7.80%             | 5.89%             | 4.39%             | 3.48%             | 0.98%           | 0.61%           | 0.34%           | 0.23%           | 0.00%           | 0.00%           | 0.00%           | 0.00%           |
| <i>Peru</i>                             | (7.41% - 8.20%)   | (5.58% - 6.18%)   | (4.20% - 4.60%)   | (3.26% - 3.73%)   | (0.85% - 1.12%) | (0.52% - 0.71%) | (0.30% - 0.39%) | (0.18% - 0.29%) | (0.00% - 0.01%) | (0.00% - 0.00%) | (0.00% - 0.00%) | (0.00% - 0.00%) |
|                                         | 9.50%             | 8.25%             | 7.68%             | 7.24%             | 2.65%           | 1.97%           | 1.64%           | 1.46%           | 0.53%           | 0.30%           | 0.18%           | 0.13%           |
| <b>Caribbean</b>                        | (9.28% - 9.70%)   | (8.05% - 8.46%)   | (7.43% - 7.91%)   | (6.94% - 7.53%)   | (2.48% - 2.84%) | (1.82% - 2.11%) | (1.49% - 1.79%) | (1.30% - 1.65%) | (0.45% - 0.62%) | (0.25% - 0.36%) | (0.14% - 0.23%) | (0.09% - 0.19%) |
|                                         | 7.32%             | 6.35%             | 5.32%             | 4.99%             | 1.46%           | 1.12%           | 0.82%           | 0.74%           | 0.13%           | 0.06%           | 0.02%           | 0.01%           |
| <i>Antigua and Barbuda</i>              | (6.84% - 7.79%)   | (5.92% - 6.81%)   | (4.92% - 5.72%)   | (4.64% - 5.41%)   | (1.27% - 1.66%) | (0.97% - 1.29%) | (0.69% - 0.95%) | (0.64% - 0.87%) | (0.09% - 0.17%) | (0.03% - 0.09%) | (0.00% - 0.03%) | (0.00% - 0.02%) |
|                                         | 5.73%             | 4.97%             | 4.74%             | 4.62%             | 0.83%           | 0.65%           | 0.61%           | 0.59%           | 0.01%           | 0.00%           | 0.00%           | 0.00%           |
| <i>Bahamas</i>                          | (5.33% - 6.17%)   | (4.59% - 5.38%)   | (4.39% - 5.11%)   | (4.27% - 4.98%)   | (0.70% - 0.98%) | (0.54% - 0.78%) | (0.50% - 0.71%) | (0.49% - 0.71%) | (0.00% - 0.02%) | (0.00% - 0.01%) | (0.00% - 0.01%) | (0.00% - 0.01%) |
|                                         | 4.10%             | 3.89%             | 3.71%             | 3.52%             | 0.29%           | 0.27%           | 0.25%           | 0.23%           | 0.00%           | 0.00%           | 0.00%           | 0.00%           |
| <i>Barbados</i>                         | (3.78% - 4.43%)   | (3.61% - 4.19%)   | (3.43% - 3.98%)   | (3.26% - 3.80%)   | (0.23% - 0.37%) | (0.21% - 0.34%) | (0.19% - 0.31%) | (0.17% - 0.30%) | (0.00% - 0.00%) | (0.00% - 0.00%) | (0.00% - 0.00%) | (0.00% - 0.00%) |
|                                         | 6.25%             | 6.02%             | 5.68%             | 5.31%             | 0.66%           | 0.66%           | 0.63%           | 0.57%           | 0.00%           | 0.00%           | 0.00%           | 0.00%           |
| <i>Belize</i>                           | (5.91% - 6.62%)   | (5.60% - 6.42%)   | (5.30% - 6.07%)   | (4.88% - 5.75%)   | (0.56% - 0.78%) | (0.53% - 0.80%) | (0.51% - 0.76%) | (0.45% - 0.70%) | (0.00% - 0.00%) | (0.00% - 0.00%) | (0.00% - 0.00%) | (0.00% - 0.00%) |
|                                         | 1.86%             | 2.49%             | 2.16%             | 1.98%             | 0.01%           | 0.04%           | 0.03%           | 0.03%           | 0.00%           | 0.00%           | 0.00%           | 0.00%           |
| <i>Cuba</i>                             | (1.73% - 2.00%)   | (2.31% - 2.67%)   | (1.99% - 2.36%)   | (1.80% - 2.17%)   | (0.01% - 0.02%) | (0.02% - 0.05%) | (0.02% - 0.05%) | (0.02% - 0.05%) | (0.00% - 0.00%) | (0.00% - 0.00%) | (0.00% - 0.00%) | (0.00% - 0.00%) |
|                                         | 5.51%             | 4.36%             | 4.09%             | 4.08%             | 0.68%           | 0.45%           | 0.41%           | 0.41%           | 0.00%           | 0.00%           | 0.00%           | 0.00%           |
| <i>Dominica</i>                         | (5.11% - 5.95%)   | (4.03% - 4.70%)   | (3.77% - 4.42%)   | (3.75% - 4.42%)   | (0.57% - 0.81%) | (0.37% - 0.55%) | (0.32% - 0.50%) | (0.33% - 0.50%) | (0.00% - 0.01%) | (0.00% - 0.00%) | (0.00% - 0.00%) | (0.00% - 0.00%) |
|                                         | 7.28%             | 4.93%             | 4.07%             | 3.57%             | 0.98%           | 0.46%           | 0.31%           | 0.26%           | 0.01%           | 0.00%           | 0.00%           | 0.00%           |
| <i>Dominican Republic</i>               | (6.91% - 7.69%)   | (4.65% - 5.22%)   | (3.82% - 4.36%)   | (3.29% - 3.85%)   | (0.84% - 1.13%) | (0.39% - 0.54%) | (0.25% - 0.38%) | (0.20% - 0.33%) | (0.00% - 0.02%) | (0.00% - 0.00%) | (0.00% - 0.00%) | (0.00% - 0.00%) |
|                                         | 7.24%             | 5.76%             | 5.36%             | 4.91%             | 1.02%           | 0.75%           | 0.67%           | 0.60%           | 0.01%           | 0.01%           | 0.00%           | 0.00%           |
| <i>Grenada</i>                          | (6.70% - 7.79%)   | (5.35% - 6.21%)   | (4.97% - 5.76%)   | (4.55% - 5.32%)   | (0.84% - 1.23%) | (0.62% - 0.90%) | (0.56% - 0.80%) | (0.49% - 0.72%) | (0.00% - 0.03%) | (0.00% - 0.02%) | (0.00% - 0.01%) | (0.00% - 0.01%) |
|                                         | 14.33%            | 11.15%            | 9.58%             | 7.86%             | 3.53%           | 2.41%           | 1.83%           | 1.40%           | 0.38%           | 0.17%           | 0.09%           | 0.05%           |
| <i>Guyana</i>                           | (13.61% - 15.07%) | (10.52% - 11.74%) | (9.05% - 10.13%)  | (7.34% - 8.41%)   | (3.07% - 4.00%) | (2.11% - 2.73%) | (1.60% - 2.07%) | (1.18% - 1.62%) | (0.26% - 0.51%) | (0.11% - 0.25%) | (0.06% - 0.13%) | (0.02% - 0.07%) |
|                                         | 21.27%            | 17.68%            | 14.59%            | 12.76%            | 8.17%           | 5.70%           | 3.95%           | 3.18%           | 1.96%           | 1.02%           | 0.50%           | 0.32%           |
| <i>Haiti</i>                            | (20.62% - 21.92%) | (17.08% - 18.34%) | (13.97% - 15.18%) | (12.09% - 13.49%) | (7.54% - 8.83%) | (5.22% - 6.21%) | (3.55% - 4.36%) | (2.79% - 3.64%) | (1.66% - 2.30%) | (0.83% - 1.23%) | (0.38% - 0.63%) | (0.22% - 0.45%) |
|                                         | 5.43%             | 3.93%             | 3.36%             | 2.99%             | 0.56%           | 0.31%           | 0.20%           | 0.16%           | 0.00%           | 0.00%           | 0.00%           | 0.00%           |
| <i>Jamaica</i>                          | (5.08% - 5.78%)   | (3.68% - 4.19%)   | (3.12% - 3.60%)   | (2.75% - 3.27%)   | (0.47% - 0.67%) | (0.25% - 0.37%) | (0.16% - 0.26%) | (0.12% - 0.21%) | (0.00% - 0.00%) | (0.00% - 0.00%) | (0.00% - 0.00%) | (0.00% - 0.00%) |
|                                         | 5.64%             | 4.68%             | 4.01%             | 3.83%             | 0.59%           | 0.46%           | 0.39%           | 0.36%           | 0.00%           | 0.00%           | 0.00%           | 0.00%           |
| <i>Saint Lucia</i>                      | (5.16% - 6.08%)   | (4.33% - 5.08%)   | (3.71% - 4.33%)   | (3.55% - 4.16%)   | (0.46% - 0.72%) | (0.37% - 0.57%) | (0.30% - 0.49%) | (0.29% - 0.45%) | (0.00% - 0.00%) | (0.00% - 0.00%) | (0.00% - 0.00%) | (0.00% - 0.00%) |
|                                         | 6.63%             | 5.42%             | 4.58%             | 4.30%             | 0.89%           | 0.62%           | 0.47%           | 0.43%           | 0.01%           | 0.00%           | 0.00%           | 0.00%           |
| <i>Saint Vincent and the Grenadines</i> | (6.12% - 7.16%)   | (5.01% - 5.88%)   | (4.21% - 4.95%)   | (3.96% - 4.64%)   | (0.73% - 1.08%) | (0.50% - 0.76%) | (0.37% - 0.58%) | (0.34% - 0.53%) | (0.00% - 0.02%) | (0.00% - 0.01%) | (0.00% - 0.00%) | (0.00% - 0.00%) |
|                                         | 9.85%             | 9.43%             | 6.86%             | 6.41%             | 1.37%           | 1.39%           | 0.85%           | 0.79%           | 0.01%           | 0.01%           | 0.00%           | 0.00%           |
| <i>Suriname</i>                         | (9.18% - 10.52%)  | (8.89% - 9.94%)   | (6.42% - 7.29%)   | (5.92% - 6.92%)   | (1.12% - 1.65%) | (1.19% - 1.62%) | (0.71% - 0.99%) | (0.64% - 0.95%) | (0.00% - 0.03%) | (0.00% - 0.03%) | (0.00% - 0.00%) | (0.00% - 0.00%) |
|                                         | 4.81%             | 4.72%             | 4.82%             | 4.45%             | 0.43%           | 0.46%           | 0.58%           | 0.52%           | 0.00%           | 0.00%           | 0.00%           | 0.00%           |
| <i>Trinidad and Tobago</i>              | (4.46% - 5.19%)   | (4.39% - 5.05%)   | (4.50% - 5.16%)   | (4.14% - 4.80%)   | (0.35% - 0.53%) | (0.38% - 0.56%) | (0.48% - 0.67%) | (0.44% - 0.62%) | (0.00% - 0.00%) | (0.00% - 0.00%) | (0.00% - 0.00%) | (0.00% - 0.00%) |

Table S8c. Estimated overall, severe, and extreme **underweight** prevalence (%) in children under 5 years, both sexes, in 1990, 2000, 2010, and 2020.

| Location                     | Total                       |                             |                             |                             | Severe                   |                          |                          |                          | Extreme                  |                          |                          |                          |
|------------------------------|-----------------------------|-----------------------------|-----------------------------|-----------------------------|--------------------------|--------------------------|--------------------------|--------------------------|--------------------------|--------------------------|--------------------------|--------------------------|
|                              | 1990                        | 2000                        | 2010                        | 2020                        | 1990                     | 2000                     | 2010                     | 2020                     | 1990                     | 2000                     | 2010                     | 2020                     |
| Bermuda                      | 4.43%<br>(4.10% - 4.76%)    | 4.03%<br>(3.74% - 4.32%)    | 3.76%<br>(3.49% - 4.04%)    | 3.50%<br>(3.24% - 3.77%)    | 0.60%<br>(0.50% - 0.71%) | 0.55%<br>(0.46% - 0.64%) | 0.51%<br>(0.43% - 0.60%) | 0.46%<br>(0.38% - 0.55%) | 0.00%<br>(0.00% - 0.01%) | 0.00%<br>(0.00% - 0.01%) | 0.00%<br>(0.00% - 0.00%) | 0.00%<br>(0.00% - 0.00%) |
| Puerto Rico                  | 4.40%<br>(4.06% - 4.75%)    | 3.60%<br>(3.33% - 3.89%)    | 3.20%<br>(2.93% - 3.46%)    | 3.02%<br>(2.77% - 3.29%)    | 0.57%<br>(0.47% - 0.68%) | 0.40%<br>(0.32% - 0.48%) | 0.33%<br>(0.27% - 0.40%) | 0.31%<br>(0.25% - 0.38%) | 0.00%<br>(0.00% - 0.00%) | 0.00%<br>(0.00% - 0.00%) | 0.00%<br>(0.00% - 0.00%) | 0.00%<br>(0.00% - 0.00%) |
| Saint Kitts and Nevis        | 5.96%<br>(5.52% - 6.45%)    | 4.99%<br>(4.63% - 5.35%)    | 4.68%<br>(4.32% - 5.04%)    | 4.32%<br>(4.00% - 4.64%)    | 0.79%<br>(0.65% - 0.94%) | 0.62%<br>(0.52% - 0.74%) | 0.58%<br>(0.48% - 0.69%) | 0.51%<br>(0.43% - 0.61%) | 0.00%<br>(0.00% - 0.01%) | 0.00%<br>(0.00% - 0.01%) | 0.00%<br>(0.00% - 0.00%) | 0.00%<br>(0.00% - 0.00%) |
| United States Virgin Islands | 5.20%<br>(4.84% - 5.63%)    | 4.08%<br>(3.78% - 4.42%)    | 3.54%<br>(3.29% - 3.84%)    | 3.60%<br>(3.32% - 3.89%)    | 0.70%<br>(0.59% - 0.84%) | 0.46%<br>(0.38% - 0.56%) | 0.36%<br>(0.29% - 0.43%) | 0.38%<br>(0.31% - 0.46%) | 0.00%<br>(0.00% - 0.01%) | 0.00%<br>(0.00% - 0.00%) | 0.00%<br>(0.00% - 0.00%) | 0.00%<br>(0.00% - 0.00%) |
| <b>Central Latin America</b> | 8.24%<br>(8.13% - 8.36%)    | 6.55%<br>(6.46% - 6.65%)    | 5.15%<br>(5.06% - 5.24%)    | 4.75%<br>(4.65% - 4.85%)    | 1.32%<br>(1.26% - 1.38%) | 0.95%<br>(0.90% - 1.00%) | 0.59%<br>(0.56% - 0.63%) | 0.53%<br>(0.50% - 0.58%) | 0.08%<br>(0.06% - 0.09%) | 0.05%<br>(0.04% - 0.07%) | 0.01%<br>(0.01% - 0.02%) | 0.01%<br>(0.00% - 0.02%) |
| Colombia                     | 7.73%<br>(7.28% - 8.20%)    | 5.47%<br>(5.16% - 5.79%)    | 4.05%<br>(3.80% - 4.30%)    | 3.44%<br>(3.18% - 3.70%)    | 1.02%<br>(0.86% - 1.18%) | 0.50%<br>(0.41% - 0.59%) | 0.25%<br>(0.20% - 0.31%) | 0.20%<br>(0.15% - 0.26%) | 0.00%<br>(0.00% - 0.01%) | 0.00%<br>(0.00% - 0.00%) | 0.00%<br>(0.00% - 0.00%) | 0.00%<br>(0.00% - 0.00%) |
| Costa Rica                   | 2.24%<br>(2.05% - 2.45%)    | 1.92%<br>(1.75% - 2.12%)    | 1.53%<br>(1.40% - 1.66%)    | 1.37%<br>(1.24% - 1.50%)    | 0.04%<br>(0.03% - 0.06%) | 0.03%<br>(0.02% - 0.04%) | 0.01%<br>(0.01% - 0.02%) | 0.01%<br>(0.00% - 0.02%) | 0.00%<br>(0.00% - 0.00%) | 0.00%<br>(0.00% - 0.00%) | 0.00%<br>(0.00% - 0.00%) | 0.00%<br>(0.00% - 0.00%) |
| El Salvador                  | 10.33%<br>(9.82% - 10.83%)  | 7.47%<br>(7.12% - 7.83%)    | 5.73%<br>(5.39% - 6.09%)    | 4.89%<br>(4.54% - 5.28%)    | 1.49%<br>(1.28% - 1.73%) | 0.91%<br>(0.77% - 1.04%) | 0.59%<br>(0.50% - 0.70%) | 0.47%<br>(0.38% - 0.58%) | 0.01%<br>(0.00% - 0.03%) | 0.00%<br>(0.00% - 0.00%) | 0.00%<br>(0.00% - 0.00%) | 0.00%<br>(0.00% - 0.00%) |
| Guatemala                    | 23.24%<br>(22.54% - 23.99%) | 18.19%<br>(17.55% - 18.79%) | 13.09%<br>(12.45% - 13.72%) | 11.48%<br>(10.81% - 12.17%) | 6.27%<br>(5.57% - 6.98%) | 4.87%<br>(4.37% - 5.40%) | 2.62%<br>(2.26% - 2.99%) | 2.10%<br>(1.75% - 2.45%) | 0.74%<br>(0.53% - 0.99%) | 0.60%<br>(0.44% - 0.78%) | 0.14%<br>(0.07% - 0.23%) | 0.07%<br>(0.02% - 0.14%) |
| Honduras                     | 15.43%<br>(14.82% - 16.03%) | 12.12%<br>(11.57% - 12.70%) | 7.98%<br>(7.46% - 8.49%)    | 7.17%<br>(6.64% - 7.73%)    | 3.55%<br>(3.13% - 3.98%) | 2.17%<br>(1.89% - 2.47%) | 1.04%<br>(0.86% - 1.23%) | 0.91%<br>(0.73% - 1.11%) | 0.30%<br>(0.21% - 0.41%) | 0.06%<br>(0.02% - 0.12%) | 0.00%<br>(0.00% - 0.01%) | 0.00%<br>(0.00% - 0.01%) |
| Mexico                       | 6.62%<br>(6.50% - 6.72%)    | 5.26%<br>(5.15% - 5.36%)    | 4.48%<br>(4.38% - 4.58%)    | 4.17%<br>(4.07% - 4.26%)    | 0.83%<br>(0.79% - 0.87%) | 0.58%<br>(0.54% - 0.61%) | 0.47%<br>(0.43% - 0.50%) | 0.43%<br>(0.40% - 0.47%) | 0.03%<br>(0.02% - 0.04%) | 0.01%<br>(0.01% - 0.01%) | 0.01%<br>(0.00% - 0.01%) | 0.01%<br>(0.00% - 0.01%) |
| <i>AguaCalientes</i>         | 4.09%<br>(3.81% - 4.41%)    | 3.31%<br>(3.08% - 3.57%)    | 3.25%<br>(3.01% - 3.52%)    | 3.09%<br>(2.85% - 3.32%)    | 0.25%<br>(0.19% - 0.31%) | 0.17%<br>(0.13% - 0.22%) | 0.20%<br>(0.15% - 0.26%) | 0.20%<br>(0.15% - 0.26%) | 0.00%<br>(0.00% - 0.00%) | 0.00%<br>(0.00% - 0.00%) | 0.00%<br>(0.00% - 0.00%) | 0.00%<br>(0.00% - 0.00%) |
| <i>Baja California</i>       | 4.32%<br>(3.95% - 4.70%)    | 2.75%<br>(2.90% - 3.48%)    | 2.58%<br>(2.47% - 3.03%)    | 2.58%<br>(2.34% - 2.85%)    | 0.30%<br>(0.21% - 0.41%) | 0.17%<br>(0.11% - 0.25%) | 0.11%<br>(0.05% - 0.16%) | 0.09%<br>(0.05% - 0.14%) | 0.00%<br>(0.00% - 0.00%) | 0.00%<br>(0.00% - 0.00%) | 0.00%<br>(0.00% - 0.00%) | 0.00%<br>(0.00% - 0.00%) |
| <i>Baja California Sur</i>   | 4.80%<br>(4.44% - 5.21%)    | 3.94%<br>(3.65% - 4.26%)    | 3.57%<br>(3.31% - 3.86%)    | 3.45%<br>(3.21% - 3.72%)    | 0.23%<br>(0.15% - 0.33%) | 0.20%<br>(0.14% - 0.27%) | 0.20%<br>(0.14% - 0.26%) | 0.20%<br>(0.15% - 0.27%) | 0.00%<br>(0.00% - 0.00%) | 0.00%<br>(0.00% - 0.00%) | 0.00%<br>(0.00% - 0.00%) | 0.00%<br>(0.00% - 0.00%) |
| <i>Campeche</i>              | 5.91%<br>(5.43% - 6.39%)    | 4.62%<br>(4.28% - 4.99%)    | 4.09%<br>(3.77% - 4.40%)    | 3.65%<br>(3.34% - 3.96%)    | 0.70%<br>(0.54% - 0.88%) | 0.51%<br>(0.41% - 0.63%) | 0.43%<br>(0.34% - 0.53%) | 0.35%<br>(0.27% - 0.45%) | 0.01%<br>(0.00% - 0.02%) | 0.00%<br>(0.00% - 0.00%) | 0.00%<br>(0.00% - 0.00%) | 0.00%<br>(0.00% - 0.00%) |
| <i>Coahuila</i>              | 5.10%<br>(4.71% - 5.52%)    | 3.96%<br>(3.63% - 4.30%)    | 3.81%<br>(3.50% - 4.14%)    | 3.68%<br>(3.36% - 4.03%)    | 0.44%<br>(0.33% - 0.58%) | 0.29%<br>(0.22% - 0.38%) | 0.25%<br>(0.19% - 0.34%) | 0.24%<br>(0.17% - 0.32%) | 0.00%<br>(0.00% - 0.00%) | 0.00%<br>(0.00% - 0.00%) | 0.00%<br>(0.00% - 0.00%) | 0.00%<br>(0.00% - 0.00%) |
| <i>Colima</i>                | 1.21%<br>(1.13% - 1.30%)    | 0.86%<br>(0.80% - 0.92%)    | 0.79%<br>(0.73% - 0.86%)    | 0.75%<br>(0.69% - 0.81%)    | 0.01%<br>(0.00% - 0.02%) | 0.00%<br>(0.00% - 0.01%) | 0.00%<br>(0.00% - 0.01%) | 0.00%<br>(0.00% - 0.01%) | 0.00%<br>(0.00% - 0.00%) | 0.00%<br>(0.00% - 0.00%) | 0.00%<br>(0.00% - 0.00%) | 0.00%<br>(0.00% - 0.00%) |
| <i>Chiapas</i>               | 13.16%<br>(12.72% - 13.59%) | 10.04%<br>(9.45% - 10.60%)  | 7.14%<br>(6.66% - 7.68%)    | 6.19%<br>(5.73% - 6.67%)    | 2.88%<br>(2.61% - 3.13%) | 1.55%<br>(1.32% - 1.80%) | 0.77%<br>(0.63% - 0.94%) | 0.55%<br>(0.43% - 0.68%) | 0.21%<br>(0.16% - 0.27%) | 0.02%<br>(0.01% - 0.04%) | 0.00%<br>(0.00% - 0.01%) | 0.00%<br>(0.00% - 0.00%) |
| <i>Chihuahua</i>             | 5.73%<br>(5.32% - 6.14%)    | 5.07%<br>(4.72% - 5.42%)    | 4.49%<br>(4.18% - 4.81%)    | 4.26%<br>(3.95% - 4.61%)    | 0.71%<br>(0.59% - 0.84%) | 0.61%<br>(0.51% - 0.71%) | 0.48%<br>(0.40% - 0.57%) | 0.41%<br>(0.34% - 0.50%) | 0.01%<br>(0.00% - 0.02%) | 0.00%<br>(0.00% - 0.01%) | 0.00%<br>(0.00% - 0.00%) | 0.00%<br>(0.00% - 0.00%) |
| <i>Mexico City</i>           | 2.95%<br>(2.76% - 3.16%)    | 2.37%<br>(2.21% - 2.53%)    | 2.14%<br>(1.99% - 2.29%)    | 1.93%<br>(1.80% - 2.07%)    | 0.16%<br>(0.12% - 0.20%) | 0.12%<br>(0.09% - 0.15%) | 0.10%<br>(0.07% - 0.12%) | 0.08%<br>(0.06% - 0.11%) | 0.00%<br>(0.00% - 0.00%) | 0.00%<br>(0.00% - 0.00%) | 0.00%<br>(0.00% - 0.00%) | 0.00%<br>(0.00% - 0.00%) |
| <i>Durango</i>               | 4.50%<br>(4.16% - 4.87%)    | 3.30%<br>(3.03% - 3.55%)    | 2.86%<br>(2.64% - 3.11%)    | 2.60%<br>(2.39% - 2.83%)    | 0.16%<br>(0.10% - 0.24%) | 0.11%<br>(0.07% - 0.16%) | 0.10%<br>(0.07% - 0.15%) | 0.09%<br>(0.05% - 0.13%) | 0.00%<br>(0.00% - 0.00%) | 0.00%<br>(0.00% - 0.00%) | 0.00%<br>(0.00% - 0.00%) | 0.00%<br>(0.00% - 0.00%) |
| <i>Guanajuato</i>            | 6.68%<br>(6.19% - 7.20%)    | 4.79%<br>(4.40% - 5.17%)    | 3.97%<br>(3.65% - 4.27%)    | 3.60%<br>(3.32% - 3.88%)    | 0.70%<br>(0.54% - 0.89%) | 0.43%<br>(0.33% - 0.54%) | 0.26%<br>(0.20% - 0.32%) | 0.22%<br>(0.16% - 0.29%) | 0.00%<br>(0.00% - 0.02%) | 0.00%<br>(0.00% - 0.00%) | 0.00%<br>(0.00% - 0.00%) | 0.00%<br>(0.00% - 0.00%) |
| <i>Guerrero</i>              | 12.13%<br>(11.81% - 12.46%) | 8.48%<br>(8.03% - 8.94%)    | 5.40%<br>(4.99% - 5.79%)    | 4.41%<br>(4.08% - 4.77%)    | 2.57%<br>(2.38% - 2.76%) | 1.22%<br>(1.04% - 1.42%) | 0.53%<br>(0.42% - 0.65%) | 0.45%<br>(0.36% - 0.56%) | 0.16%<br>(0.11% - 0.21%) | 0.00%<br>(0.00% - 0.02%) | 0.00%<br>(0.00% - 0.00%) | 0.00%<br>(0.00% - 0.00%) |

**Table S8c. Estimated overall, severe, and extreme underweight prevalence (%) in children under 5 years, both sexes, in 1990, 2000, 2010, and 2020.**

| Location                           | Total                       |                          |                          |                          | Severe                   |                          |                          |                          | Extreme                  |                          |                          |                          |
|------------------------------------|-----------------------------|--------------------------|--------------------------|--------------------------|--------------------------|--------------------------|--------------------------|--------------------------|--------------------------|--------------------------|--------------------------|--------------------------|
|                                    | 1990                        | 2000                     | 2010                     | 2020                     | 1990                     | 2000                     | 2010                     | 2020                     | 1990                     | 2000                     | 2010                     | 2020                     |
|                                    | 8.21%<br>(7.60% - 8.87%)    | 6.36%<br>(5.92% - 6.85%) | 5.46%<br>(5.07% - 5.86%) | 4.93%<br>(4.56% - 5.32%) | 0.87%<br>(0.68% - 1.10%) | 0.69%<br>(0.55% - 0.83%) | 0.62%<br>(0.50% - 0.75%) | 0.58%<br>(0.47% - 0.71%) | 0.00%<br>(0.00% - 0.01%) | 0.00%<br>(0.00% - 0.01%) | 0.00%<br>(0.00% - 0.01%) | 0.00%<br>(0.00% - 0.01%) |
| Hidalgo                            | 3.85%<br>(3.41% - 4.28%)    | 2.59%<br>(2.76% - 3.45%) | 2.44%<br>(2.38% - 2.80%) | 2.44%<br>(2.21% - 2.65%) | 0.15%<br>(0.10% - 0.22%) | 0.12%<br>(0.07% - 0.17%) | 0.10%<br>(0.07% - 0.14%) | 0.09%<br>(0.06% - 0.13%) | 0.00%<br>(0.00% - 0.00%) | 0.00%<br>(0.00% - 0.00%) | 0.00%<br>(0.00% - 0.00%) | 0.00%<br>(0.00% - 0.00%) |
| Jalisco                            | 9.49%<br>(8.87% - 10.14%)   | 7.68%<br>(7.12% - 8.28%) | 7.80%<br>(7.20% - 8.40%) | 7.40%<br>(6.81% - 7.98%) | 1.40%<br>(1.15% - 1.69%) | 1.09%<br>(0.89% - 1.31%) | 1.29%<br>(1.05% - 1.57%) | 1.23%<br>(1.00% - 1.50%) | 0.01%<br>(0.00% - 0.03%) | 0.00%<br>(0.00% - 0.01%) | 0.03%<br>(0.00% - 0.08%) | 0.03%<br>(0.00% - 0.08%) |
| México                             | 5.43%<br>(4.97% - 5.91%)    | 3.96%<br>(3.60% - 4.34%) | 2.73%<br>(2.47% - 2.98%) | 2.43%<br>(2.18% - 2.65%) | 0.44%<br>(0.31% - 0.61%) | 0.25%<br>(0.16% - 0.34%) | 0.09%<br>(0.05% - 0.13%) | 0.07%<br>(0.04% - 0.11%) | 0.00%<br>(0.00% - 0.00%) | 0.00%<br>(0.00% - 0.00%) | 0.00%<br>(0.00% - 0.00%) | 0.00%<br>(0.00% - 0.00%) |
| Michoacán de Ocampo                | 5.73%<br>(5.25% - 6.18%)    | 4.46%<br>(4.11% - 4.86%) | 3.86%<br>(3.55% - 4.18%) | 3.62%<br>(3.31% - 3.95%) | 0.55%<br>(0.39% - 0.74%) | 0.42%<br>(0.31% - 0.55%) | 0.36%<br>(0.27% - 0.48%) | 0.34%<br>(0.25% - 0.45%) | 0.00%<br>(0.00% - 0.00%) | 0.00%<br>(0.00% - 0.00%) | 0.00%<br>(0.00% - 0.00%) | 0.00%<br>(0.00% - 0.00%) |
| Morelos                            | 5.65%<br>(5.19% - 6.09%)    | 4.42%<br>(4.06% - 4.81%) | 3.82%<br>(3.53% - 4.13%) | 3.55%<br>(3.26% - 3.87%) | 0.48%<br>(0.36% - 0.61%) | 0.36%<br>(0.28% - 0.46%) | 0.30%<br>(0.24% - 0.39%) | 0.27%<br>(0.21% - 0.35%) | 0.00%<br>(0.00% - 0.00%) | 0.00%<br>(0.00% - 0.00%) | 0.00%<br>(0.00% - 0.00%) | 0.00%<br>(0.00% - 0.00%) |
| Nayarit                            | 2.08%<br>(1.91% - 2.28%)    | 1.75%<br>(1.60% - 1.92%) | 1.52%<br>(1.39% - 1.65%) | 1.43%<br>(1.31% - 1.57%) | 0.01%<br>(0.01% - 0.02%) | 0.01%<br>(0.00% - 0.01%) | 0.00%<br>(0.00% - 0.01%) | 0.00%<br>(0.00% - 0.01%) | 0.00%<br>(0.00% - 0.00%) | 0.00%<br>(0.00% - 0.00%) | 0.00%<br>(0.00% - 0.00%) | 0.00%<br>(0.00% - 0.00%) |
| Nuevo León                         | 9.98%<br>(9.26% - 10.74%)   | 8.11%<br>(7.57% - 8.72%) | 6.07%<br>(5.59% - 6.57%) | 5.41%<br>(4.99% - 5.92%) | 1.29%<br>(1.00% - 1.65%) | 1.00%<br>(0.80% - 1.23%) | 0.64%<br>(0.49% - 0.81%) | 0.55%<br>(0.42% - 0.71%) | 0.01%<br>(0.00% - 0.04%) | 0.00%<br>(0.00% - 0.01%) | 0.00%<br>(0.00% - 0.00%) | 0.00%<br>(0.00% - 0.00%) |
| Oaxaca                             | 6.26%<br>(5.76% - 6.82%)    | 5.31%<br>(4.89% - 5.79%) | 5.06%<br>(4.65% - 5.49%) | 5.87%<br>(5.37% - 6.38%) | 0.39%<br>(0.26% - 0.56%) | 0.39%<br>(0.28% - 0.54%) | 0.50%<br>(0.37% - 0.65%) | 0.82%<br>(0.59% - 1.09%) | 0.00%<br>(0.00% - 0.00%) | 0.00%<br>(0.00% - 0.00%) | 0.00%<br>(0.00% - 0.01%) | 0.03%<br>(0.00% - 0.10%) |
| Puebla                             | 5.13%<br>(4.71% - 5.54%)    | 3.59%<br>(3.31% - 3.91%) | 3.05%<br>(2.82% - 3.32%) | 2.87%<br>(2.63% - 3.12%) | 0.45%<br>(0.35% - 0.56%) | 0.23%<br>(0.18% - 0.30%) | 0.16%<br>(0.12% - 0.21%) | 0.15%<br>(0.11% - 0.21%) | 0.00%<br>(0.00% - 0.00%) | 0.00%<br>(0.00% - 0.00%) | 0.00%<br>(0.00% - 0.00%) | 0.00%<br>(0.00% - 0.00%) |
| Querétaro                          | 3.10%<br>(2.86% - 3.37%)    | 2.31%<br>(2.12% - 2.50%) | 2.04%<br>(1.90% - 2.20%) | 1.89%<br>(1.75% - 2.06%) | 0.08%<br>(0.06% - 0.11%) | 0.05%<br>(0.03% - 0.06%) | 0.03%<br>(0.02% - 0.05%) | 0.03%<br>(0.02% - 0.04%) | 0.00%<br>(0.00% - 0.00%) | 0.00%<br>(0.00% - 0.00%) | 0.00%<br>(0.00% - 0.00%) | 0.00%<br>(0.00% - 0.00%) |
| Quintana Roo                       | 11.46%<br>(10.72% - 12.22%) | 8.79%<br>(8.20% - 9.48%) | 5.55%<br>(5.07% - 6.01%) | 4.85%<br>(4.38% - 5.31%) | 2.79%<br>(2.23% - 3.35%) | 2.02%<br>(1.65% - 2.46%) | 1.02%<br>(0.78% - 1.30%) | 0.87%<br>(0.64% - 1.12%) | 0.41%<br>(0.22% - 0.64%) | 0.30%<br>(0.16% - 0.46%) | 0.12%<br>(0.05% - 0.21%) | 0.08%<br>(0.02% - 0.15%) |
| San Luis Potosí                    | 4.02%<br>(3.70% - 4.39%)    | 3.20%<br>(2.93% - 3.49%) | 2.91%<br>(2.65% - 3.17%) | 2.73%<br>(2.48% - 2.99%) | 0.18%<br>(0.12% - 0.25%) | 0.11%<br>(0.07% - 0.16%) | 0.09%<br>(0.06% - 0.14%) | 0.07%<br>(0.04% - 0.11%) | 0.00%<br>(0.00% - 0.00%) | 0.00%<br>(0.00% - 0.00%) | 0.00%<br>(0.00% - 0.00%) | 0.00%<br>(0.00% - 0.00%) |
| Sinaloa                            | 8.52%<br>(7.91% - 9.13%)    | 7.50%<br>(6.97% - 8.06%) | 7.08%<br>(6.55% - 7.60%) | 6.58%<br>(6.10% - 7.13%) | 1.39%<br>(1.15% - 1.64%) | 1.02%<br>(0.84% - 1.24%) | 0.99%<br>(0.79% - 1.20%) | 0.94%<br>(0.77% - 1.14%) | 0.07%<br>(0.05% - 0.11%) | 0.01%<br>(0.00% - 0.02%) | 0.00%<br>(0.00% - 0.01%) | 0.00%<br>(0.00% - 0.01%) |
| Sonora                             | 8.24%<br>(7.67% - 8.83%)    | 6.03%<br>(5.59% - 6.49%) | 4.68%<br>(4.33% - 5.03%) | 4.20%<br>(3.87% - 4.56%) | 1.21%<br>(0.99% - 1.44%) | 0.74%<br>(0.59% - 0.90%) | 0.47%<br>(0.38% - 0.57%) | 0.41%<br>(0.32% - 0.51%) | 0.02%<br>(0.01% - 0.06%) | 0.00%<br>(0.00% - 0.00%) | 0.00%<br>(0.00% - 0.00%) | 0.00%<br>(0.00% - 0.00%) |
| Tabasco                            | 3.48%<br>(3.21% - 3.77%)    | 2.71%<br>(2.50% - 2.93%) | 2.41%<br>(2.23% - 2.61%) | 2.24%<br>(2.07% - 2.43%) | 0.16%<br>(0.11% - 0.21%) | 0.10%<br>(0.07% - 0.14%) | 0.07%<br>(0.05% - 0.09%) | 0.06%<br>(0.05% - 0.08%) | 0.00%<br>(0.00% - 0.00%) | 0.00%<br>(0.00% - 0.00%) | 0.00%<br>(0.00% - 0.00%) | 0.00%<br>(0.00% - 0.00%) |
| Tamaulipas                         | 6.78%<br>(6.28% - 7.29%)    | 5.29%<br>(4.93% - 5.67%) | 4.40%<br>(4.08% - 4.74%) | 4.17%<br>(3.86% - 4.53%) | 0.59%<br>(0.47% - 0.73%) | 0.45%<br>(0.36% - 0.55%) | 0.36%<br>(0.29% - 0.44%) | 0.37%<br>(0.29% - 0.46%) | 0.00%<br>(0.00% - 0.00%) | 0.00%<br>(0.00% - 0.00%) | 0.00%<br>(0.00% - 0.00%) | 0.00%<br>(0.00% - 0.00%) |
| Tlaxcala                           | 5.20%<br>(4.83% - 5.60%)    | 4.30%<br>(3.98% - 4.65%) | 3.26%<br>(3.02% - 3.51%) | 2.76%<br>(2.54% - 2.99%) | 0.35%<br>(0.27% - 0.44%) | 0.29%<br>(0.22% - 0.37%) | 0.19%<br>(0.15% - 0.24%) | 0.14%<br>(0.10% - 0.18%) | 0.00%<br>(0.00% - 0.00%) | 0.00%<br>(0.00% - 0.00%) | 0.00%<br>(0.00% - 0.00%) | 0.00%<br>(0.00% - 0.00%) |
| Veracruz de Ignacio de la Llave    | 5.96%<br>(5.50% - 6.44%)    | 4.83%<br>(4.44% - 5.27%) | 5.17%<br>(4.74% - 5.66%) | 4.82%<br>(4.41% - 5.25%) | 0.40%<br>(0.30% - 0.52%) | 0.34%<br>(0.25% - 0.44%) | 0.52%<br>(0.39% - 0.66%) | 0.47%<br>(0.35% - 0.61%) | 0.00%<br>(0.00% - 0.00%) | 0.00%<br>(0.00% - 0.00%) | 0.00%<br>(0.00% - 0.00%) | 0.00%<br>(0.00% - 0.00%) |
| Yucatán                            | 6.41%<br>(5.96% - 6.91%)    | 5.49%<br>(5.09% - 5.90%) | 4.93%<br>(4.56% - 5.32%) | 4.53%<br>(4.17% - 4.90%) | 0.79%<br>(0.64% - 0.97%) | 0.65%<br>(0.54% - 0.79%) | 0.51%<br>(0.41% - 0.63%) | 0.41%<br>(0.32% - 0.52%) | 0.01%<br>(0.00% - 0.02%) | 0.00%<br>(0.00% - 0.01%) | 0.00%<br>(0.00% - 0.01%) | 0.00%<br>(0.00% - 0.01%) |
| Zacatecas                          | 9.35%<br>(8.88% - 9.80%)    | 7.92%<br>(7.54% - 8.33%) | 5.57%<br>(5.18% - 5.98%) | 4.67%<br>(4.29% - 5.04%) | 1.70%<br>(1.50% - 1.89%) | 1.23%<br>(1.07% - 1.40%) | 0.63%<br>(0.53% - 0.75%) | 0.50%<br>(0.40% - 0.61%) | 0.04%<br>(0.02% - 0.07%) | 0.01%<br>(0.00% - 0.02%) | 0.00%<br>(0.00% - 0.00%) | 0.00%<br>(0.00% - 0.00%) |
| Nicaragua                          | 6.00%<br>(5.65% - 6.40%)    | 4.72%<br>(4.46% - 5.01%) | 3.98%<br>(3.73% - 4.24%) | 3.17%<br>(2.92% - 3.45%) | 0.68%<br>(0.58% - 0.79%) | 0.44%<br>(0.37% - 0.51%) | 0.30%<br>(0.25% - 0.36%) | 0.21%<br>(0.16% - 0.27%) | 0.00%<br>(0.00% - 0.00%) | 0.00%<br>(0.00% - 0.00%) | 0.00%<br>(0.00% - 0.00%) | 0.00%<br>(0.00% - 0.00%) |
| Panama                             | 5.94%<br>(5.76% - 6.16%)    | 4.37%<br>(4.18% - 4.57%) | 3.73%<br>(3.49% - 3.99%) | 3.81%<br>(3.53% - 4.11%) | 0.65%<br>(0.59% - 0.71%) | 0.33%<br>(0.28% - 0.37%) | 0.25%<br>(0.19% - 0.30%) | 0.28%<br>(0.22% - 0.36%) | 0.00%<br>(0.00% - 0.00%) | 0.00%<br>(0.00% - 0.00%) | 0.00%<br>(0.00% - 0.00%) | 0.00%<br>(0.00% - 0.00%) |
| Venezuela (Bolivarian Republic of) |                             |                          |                          |                          |                          |                          |                          |                          |                          |                          |                          |                          |



Table S8c. Estimated overall, severe, and extreme underweight prevalence (%) in children under 5 years, both sexes, in 1990, 2000, 2010, and 2020.

| Location                      | Total                       |                          |                            |                          | Severe                   |                          |                          |                          | Extreme                  |                          |                          |                          |
|-------------------------------|-----------------------------|--------------------------|----------------------------|--------------------------|--------------------------|--------------------------|--------------------------|--------------------------|--------------------------|--------------------------|--------------------------|--------------------------|
|                               | 1990                        | 2000                     | 2010                       | 2020                     | 1990                     | 2000                     | 2010                     | 2020                     | 1990                     | 2000                     | 2010                     | 2020                     |
| <b>Tropical Latin America</b> | 5.81%<br>(5.69% - 5.93%)    | 4.41%<br>(4.33% - 4.49%) | 3.61%<br>(3.54% - 3.68%)   | 3.27%<br>(3.20% - 3.34%) | 0.69%<br>(0.65% - 0.73%) | 0.47%<br>(0.45% - 0.49%) | 0.37%<br>(0.35% - 0.39%) | 0.33%<br>(0.31% - 0.35%) | 0.03%<br>(0.02% - 0.03%) | 0.02%<br>(0.02% - 0.02%) | 0.02%<br>(0.02% - 0.03%) | 0.02%<br>(0.02% - 0.02%) |
| Brazil                        | 5.92%<br>(5.80% - 6.05%)    | 4.47%<br>(4.38% - 4.56%) | 3.66%<br>(3.58% - 3.73%)   | 3.35%<br>(3.28% - 3.42%) | 0.71%<br>(0.67% - 0.75%) | 0.48%<br>(0.46% - 0.51%) | 0.38%<br>(0.36% - 0.40%) | 0.34%<br>(0.32% - 0.36%) | 0.03%<br>(0.02% - 0.03%) | 0.02%<br>(0.02% - 0.02%) | 0.02%<br>(0.02% - 0.03%) | 0.02%<br>(0.02% - 0.02%) |
| Acre                          | 10.03%<br>(9.28% - 10.80%)  | 7.42%<br>(6.85% - 7.96%) | 5.96%<br>(5.51% - 6.43%)   | 5.37%<br>(4.94% - 5.80%) | 1.44%<br>(1.15% - 1.77%) | 0.98%<br>(0.78% - 1.18%) | 0.74%<br>(0.59% - 0.90%) | 0.68%<br>(0.54% - 0.82%) | 0.01%<br>(0.00% - 0.06%) | 0.00%<br>(0.00% - 0.01%) | 0.00%<br>(0.00% - 0.00%) | 0.00%<br>(0.00% - 0.00%) |
| Alagoas                       | 8.95%<br>(8.32% - 9.68%)    | 6.62%<br>(6.14% - 7.13%) | 5.02%<br>(4.64% - 5.42%)   | 4.60%<br>(4.23% - 4.99%) | 1.16%<br>(0.91% - 1.43%) | 0.75%<br>(0.59% - 0.93%) | 0.49%<br>(0.38% - 0.63%) | 0.45%<br>(0.34% - 0.58%) | 0.05%<br>(0.00% - 0.12%) | 0.02%<br>(0.00% - 0.05%) | 0.00%<br>(0.00% - 0.02%) | 0.00%<br>(0.00% - 0.02%) |
| Amazonas                      | 6.20%<br>(5.68% - 6.76%)    | 5.04%<br>(4.67% - 5.43%) | 4.48%<br>(4.13% - 4.85%)   | 4.03%<br>(3.70% - 4.35%) | 0.46%<br>(0.33% - 0.62%) | 0.42%<br>(0.33% - 0.53%) | 0.40%<br>(0.31% - 0.50%) | 0.35%<br>(0.27% - 0.44%) | 0.00%<br>(0.00% - 0.00%) | 0.00%<br>(0.00% - 0.00%) | 0.00%<br>(0.00% - 0.00%) | 0.00%<br>(0.00% - 0.00%) |
| Amapá                         | 5.24%<br>(4.84% - 5.67%)    | 3.97%<br>(3.64% - 4.30%) | 3.21%<br>(2.95% - 3.49%)   | 2.99%<br>(2.76% - 3.25%) | 0.54%<br>(0.43% - 0.66%) | 0.32%<br>(0.25% - 0.40%) | 0.20%<br>(0.14% - 0.26%) | 0.17%<br>(0.13% - 0.23%) | 0.00%<br>(0.00% - 0.00%) | 0.00%<br>(0.00% - 0.00%) | 0.00%<br>(0.00% - 0.00%) | 0.00%<br>(0.00% - 0.00%) |
| Bahia                         | 7.57%<br>(7.06% - 8.15%)    | 5.69%<br>(5.31% - 6.11%) | 4.48%<br>(4.15% - 4.83%)   | 4.11%<br>(3.79% - 4.43%) | 0.94%<br>(0.79% - 1.11%) | 0.65%<br>(0.54% - 0.78%) | 0.47%<br>(0.38% - 0.56%) | 0.43%<br>(0.35% - 0.52%) | 0.01%<br>(0.00% - 0.03%) | 0.00%<br>(0.00% - 0.00%) | 0.00%<br>(0.00% - 0.00%) | 0.00%<br>(0.00% - 0.00%) |
| Ceará                         | 7.78%<br>(7.18% - 8.41%)    | 5.08%<br>(4.68% - 5.51%) | 2.38%<br>(2.14% - 2.63%)   | 1.97%<br>(1.78% - 2.20%) | 0.97%<br>(0.77% - 1.21%) | 0.46%<br>(0.35% - 0.60%) | 0.05%<br>(0.02% - 0.10%) | 0.03%<br>(0.01% - 0.07%) | 0.00%<br>(0.00% - 0.00%) | 0.00%<br>(0.00% - 0.00%) | 0.00%<br>(0.00% - 0.00%) | 0.00%<br>(0.00% - 0.00%) |
| Distrito Federal              | 5.14%<br>(4.74% - 5.57%)    | 3.67%<br>(3.40% - 3.96%) | 3.00%<br>(2.77% - 3.25%)   | 2.72%<br>(2.51% - 2.96%) | 0.57%<br>(0.46% - 0.70%) | 0.33%<br>(0.26% - 0.41%) | 0.24%<br>(0.18% - 0.30%) | 0.21%<br>(0.16% - 0.27%) | 0.00%<br>(0.00% - 0.00%) | 0.00%<br>(0.00% - 0.00%) | 0.00%<br>(0.00% - 0.00%) | 0.00%<br>(0.00% - 0.00%) |
| Espírito Santo                | 4.94%<br>(4.57% - 5.32%)    | 3.73%<br>(3.45% - 4.04%) | 3.10%<br>(2.87% - 3.34%)   | 2.83%<br>(2.61% - 3.05%) | 0.45%<br>(0.35% - 0.55%) | 0.29%<br>(0.23% - 0.37%) | 0.21%<br>(0.16% - 0.27%) | 0.19%<br>(0.15% - 0.25%) | 0.00%<br>(0.00% - 0.00%) | 0.00%<br>(0.00% - 0.00%) | 0.00%<br>(0.00% - 0.00%) | 0.00%<br>(0.00% - 0.00%) |
| Goiás                         | 5.87%<br>(5.45% - 6.32%)    | 4.05%<br>(3.77% - 4.36%) | 3.08%<br>(2.83% - 3.34%)   | 2.74%<br>(2.51% - 2.98%) | 0.56%<br>(0.45% - 0.68%) | 0.32%<br>(0.25% - 0.40%) | 0.18%<br>(0.12% - 0.24%) | 0.14%<br>(0.10% - 0.19%) | 0.00%<br>(0.00% - 0.00%) | 0.00%<br>(0.00% - 0.00%) | 0.00%<br>(0.00% - 0.00%) | 0.00%<br>(0.00% - 0.00%) |
| Maranhão                      | 10.45%<br>(9.80% - 11.13%)  | 6.45%<br>(6.00% - 6.93%) | 4.74%<br>(4.39% - 5.09%)   | 4.34%<br>(4.00% - 4.68%) | 1.85%<br>(1.59% - 2.15%) | 0.84%<br>(0.71% - 1.01%) | 0.52%<br>(0.43% - 0.62%) | 0.46%<br>(0.38% - 0.55%) | 0.08%<br>(0.05% - 0.12%) | 0.00%<br>(0.00% - 0.01%) | 0.00%<br>(0.00% - 0.00%) | 0.00%<br>(0.00% - 0.00%) |
| Minas Gerais                  | 5.01%<br>(4.63% - 5.39%)    | 3.73%<br>(3.45% - 4.03%) | 3.09%<br>(2.85% - 3.35%)   | 2.81%<br>(2.60% - 3.03%) | 0.44%<br>(0.35% - 0.55%) | 0.30%<br>(0.23% - 0.37%) | 0.22%<br>(0.17% - 0.28%) | 0.20%<br>(0.15% - 0.25%) | 0.00%<br>(0.00% - 0.00%) | 0.00%<br>(0.00% - 0.00%) | 0.00%<br>(0.00% - 0.00%) | 0.00%<br>(0.00% - 0.00%) |
| Mato Grosso do Sul            | 7.49%<br>(6.95% - 8.09%)    | 5.79%<br>(5.32% - 6.30%) | 4.58%<br>(4.21% - 4.98%)   | 4.10%<br>(3.76% - 4.48%) | 1.33%<br>(1.08% - 1.63%) | 0.92%<br>(0.73% - 1.15%) | 0.64%<br>(0.50% - 0.79%) | 0.56%<br>(0.44% - 0.71%) | 0.06%<br>(0.01% - 0.13%) | 0.02%<br>(0.00% - 0.07%) | 0.01%<br>(0.00% - 0.04%) | 0.00%<br>(0.00% - 0.03%) |
| Mato Grosso                   | 6.29%<br>(5.84% - 6.81%)    | 4.30%<br>(3.95% - 4.63%) | 3.16%<br>(2.92% - 3.42%)   | 2.84%<br>(2.62% - 3.06%) | 0.75%<br>(0.61% - 0.92%) | 0.42%<br>(0.32% - 0.51%) | 0.23%<br>(0.18% - 0.30%) | 0.20%<br>(0.15% - 0.26%) | 0.00%<br>(0.00% - 0.00%) | 0.00%<br>(0.00% - 0.00%) | 0.00%<br>(0.00% - 0.00%) | 0.00%<br>(0.00% - 0.00%) |
| Pará                          | 9.38%<br>(8.87% - 9.94%)    | 8.10%<br>(7.68% - 8.54%) | 7.63%<br>(7.23% - 8.03%)   | 6.97%<br>(6.57% - 7.36%) | 2.23%<br>(2.01% - 2.46%) | 2.03%<br>(1.84% - 2.25%) | 2.01%<br>(1.83% - 2.22%) | 1.79%<br>(1.61% - 1.97%) | 0.42%<br>(0.35% - 0.51%) | 0.39%<br>(0.32% - 0.47%) | 0.40%<br>(0.33% - 0.48%) | 0.35%<br>(0.28% - 0.41%) |
| Paraíba                       | 5.51%<br>(5.09% - 5.97%)    | 4.45%<br>(4.12% - 4.79%) | 3.61%<br>(3.34% - 3.90%)   | 3.37%<br>(3.11% - 3.67%) | 0.49%<br>(0.39% - 0.63%) | 0.36%<br>(0.28% - 0.45%) | 0.26%<br>(0.20% - 0.34%) | 0.26%<br>(0.19% - 0.33%) | 0.00%<br>(0.00% - 0.00%) | 0.00%<br>(0.00% - 0.00%) | 0.00%<br>(0.00% - 0.00%) | 0.00%<br>(0.00% - 0.00%) |
| Paraná                        | 2.96%<br>(2.73% - 3.22%)    | 2.59%<br>(2.38% - 2.80%) | 2.24%<br>(2.06% - 2.44%)   | 2.02%<br>(1.85% - 2.19%) | 0.09%<br>(0.05% - 0.13%) | 0.09%<br>(0.05% - 0.13%) | 0.07%<br>(0.04% - 0.11%) | 0.06%<br>(0.03% - 0.09%) | 0.00%<br>(0.00% - 0.00%) | 0.00%<br>(0.00% - 0.00%) | 0.00%<br>(0.00% - 0.00%) | 0.00%<br>(0.00% - 0.00%) |
| Pernambuco                    | 5.83%<br>(5.43% - 6.26%)    | 4.54%<br>(4.25% - 4.86%) | 3.64%<br>(3.39% - 3.92%)   | 3.30%<br>(3.05% - 3.57%) | 0.65%<br>(0.53% - 0.77%) | 0.45%<br>(0.38% - 0.54%) | 0.32%<br>(0.26% - 0.39%) | 0.29%<br>(0.23% - 0.36%) | 0.00%<br>(0.00% - 0.00%) | 0.00%<br>(0.00% - 0.00%) | 0.00%<br>(0.00% - 0.00%) | 0.00%<br>(0.00% - 0.00%) |
| Piauí                         | 9.19%<br>(8.60% - 9.76%)    | 6.84%<br>(6.36% - 7.31%) | 5.40%<br>(5.02% - 5.79%)   | 4.86%<br>(4.53% - 5.23%) | 1.63%<br>(1.40% - 1.87%) | 1.04%<br>(0.88% - 1.22%) | 0.73%<br>(0.62% - 0.86%) | 0.65%<br>(0.55% - 0.78%) | 0.05%<br>(0.03% - 0.09%) | 0.01%<br>(0.00% - 0.02%) | 0.00%<br>(0.00% - 0.00%) | 0.00%<br>(0.00% - 0.00%) |
| Rio de Janeiro                | 5.36%<br>(4.91% - 5.83%)    | 3.98%<br>(3.64% - 4.33%) | 3.30%<br>(3.04% - 3.59%)   | 3.08%<br>(2.81% - 3.35%) | 0.54%<br>(0.42% - 0.70%) | 0.37%<br>(0.28% - 0.47%) | 0.28%<br>(0.21% - 0.36%) | 0.26%<br>(0.19% - 0.34%) | 0.00%<br>(0.00% - 0.00%) | 0.00%<br>(0.00% - 0.00%) | 0.00%<br>(0.00% - 0.00%) | 0.00%<br>(0.00% - 0.00%) |
| Rio Grande do Norte           | 3.89%<br>(3.61% - 4.16%)    | 2.97%<br>(2.75% - 3.19%) | 2.45%<br>(2.28% - 2.64%)   | 2.21%<br>(2.04% - 2.39%) | 0.21%<br>(0.16% - 0.27%) | 0.14%<br>(0.11% - 0.19%) | 0.11%<br>(0.08% - 0.14%) | 0.09%<br>(0.06% - 0.12%) | 0.00%<br>(0.00% - 0.00%) | 0.00%<br>(0.00% - 0.00%) | 0.00%<br>(0.00% - 0.00%) | 0.00%<br>(0.00% - 0.00%) |
| Rorônia                       | 10.87%<br>(10.22% - 11.56%) | 9.45%<br>(8.90% - 9.98%) | 10.01%<br>(9.44% - 10.63%) | 9.09%<br>(8.60% - 9.65%) | 2.50%<br>(2.23% - 2.81%) | 1.98%<br>(1.73% - 2.21%) | 2.08%<br>(1.82% - 2.36%) | 1.88%<br>(1.67% - 2.10%) | 0.43%<br>(0.34% - 0.53%) | 0.23%<br>(0.17% - 0.30%) | 0.17%<br>(0.11% - 0.23%) | 0.15%<br>(0.10% - 0.20%) |

Table S8c. Estimated overall, severe, and extreme underweight prevalence (%) in children under 5 years, both sexes, in 1990, 2000, 2010, and 2020.

| Location                            | Total                       |                             |                             |                             | Severe                   |                          |                          |                          | Extreme                  |                          |                          |                          |
|-------------------------------------|-----------------------------|-----------------------------|-----------------------------|-----------------------------|--------------------------|--------------------------|--------------------------|--------------------------|--------------------------|--------------------------|--------------------------|--------------------------|
|                                     | 1990                        | 2000                        | 2010                        | 2020                        | 1990                     | 2000                     | 2010                     | 2020                     | 1990                     | 2000                     | 2010                     | 2020                     |
| <i>Roraima</i>                      | 6.01%<br>(5.60% - 6.48%)    | 4.22%<br>(3.89% - 4.58%)    | 3.25%<br>(2.99% - 3.53%)    | 2.98%<br>(2.76% - 3.23%)    | 0.59%<br>(0.47% - 0.73%) | 0.35%<br>(0.27% - 0.43%) | 0.21%<br>(0.16% - 0.27%) | 0.18%<br>(0.13% - 0.24%) | 0.00%<br>(0.00% - 0.00%) | 0.00%<br>(0.00% - 0.00%) | 0.00%<br>(0.00% - 0.00%) | 0.00%<br>(0.00% - 0.00%) |
| <i>Rio Grande do Sul</i>            | 4.05%<br>(3.76% - 4.37%)    | 3.20%<br>(2.95% - 3.45%)    | 2.68%<br>(2.46% - 2.89%)    | 2.49%<br>(2.30% - 2.68%)    | 0.30%<br>(0.24% - 0.38%) | 0.21%<br>(0.15% - 0.27%) | 0.15%<br>(0.11% - 0.20%) | 0.14%<br>(0.10% - 0.18%) | 0.00%<br>(0.00% - 0.00%) | 0.00%<br>(0.00% - 0.00%) | 0.00%<br>(0.00% - 0.00%) | 0.00%<br>(0.00% - 0.00%) |
| <i>Santa Catarina</i>               | 4.44%<br>(4.09% - 4.84%)    | 3.45%<br>(3.17% - 3.74%)    | 2.64%<br>(2.43% - 2.85%)    | 2.33%<br>(2.14% - 2.53%)    | 0.41%<br>(0.33% - 0.51%) | 0.26%<br>(0.20% - 0.34%) | 0.15%<br>(0.10% - 0.19%) | 0.12%<br>(0.08% - 0.16%) | 0.00%<br>(0.00% - 0.00%) | 0.00%<br>(0.00% - 0.00%) | 0.00%<br>(0.00% - 0.00%) | 0.00%<br>(0.00% - 0.00%) |
| <i>Sergipe</i>                      | 6.40%<br>(5.93% - 6.93%)    | 4.67%<br>(4.31% - 5.07%)    | 3.42%<br>(3.15% - 3.75%)    | 3.07%<br>(2.83% - 3.34%)    | 0.47%<br>(0.37% - 0.60%) | 0.28%<br>(0.21% - 0.37%) | 0.15%<br>(0.11% - 0.21%) | 0.13%<br>(0.09% - 0.18%) | 0.00%<br>(0.00% - 0.00%) | 0.00%<br>(0.00% - 0.00%) | 0.00%<br>(0.00% - 0.00%) | 0.00%<br>(0.00% - 0.00%) |
| <i>São Paulo</i>                    | 4.43%<br>(4.07% - 4.85%)    | 3.37%<br>(3.10% - 3.66%)    | 2.81%<br>(2.58% - 3.09%)    | 2.67%<br>(2.41% - 2.94%)    | 0.39%<br>(0.29% - 0.53%) | 0.27%<br>(0.19% - 0.36%) | 0.20%<br>(0.14% - 0.27%) | 0.19%<br>(0.13% - 0.27%) | 0.00%<br>(0.00% - 0.00%) | 0.00%<br>(0.00% - 0.00%) | 0.00%<br>(0.00% - 0.00%) | 0.00%<br>(0.00% - 0.00%) |
| <i>Tocantins</i>                    | 7.01%<br>(6.46% - 7.57%)    | 4.97%<br>(4.61% - 5.36%)    | 3.56%<br>(3.30% - 3.85%)    | 3.13%<br>(2.88% - 3.38%)    | 0.86%<br>(0.69% - 1.04%) | 0.49%<br>(0.39% - 0.60%) | 0.26%<br>(0.20% - 0.33%) | 0.21%<br>(0.16% - 0.27%) | 0.00%<br>(0.00% - 0.00%) | 0.00%<br>(0.00% - 0.00%) | 0.00%<br>(0.00% - 0.00%) | 0.00%<br>(0.00% - 0.00%) |
| <i>Paraguay</i>                     | 2.81%<br>(2.62% - 3.03%)    | 2.75%<br>(2.55% - 2.97%)    | 2.52%<br>(2.35% - 2.70%)    | 1.62%<br>(1.52% - 1.74%)    | 0.12%<br>(0.10% - 0.16%) | 0.09%<br>(0.07% - 0.12%) | 0.06%<br>(0.04% - 0.08%) | 0.02%<br>(0.01% - 0.03%) | 0.00%<br>(0.00% - 0.00%) | 0.00%<br>(0.00% - 0.00%) | 0.00%<br>(0.00% - 0.00%) | 0.00%<br>(0.00% - 0.00%) |
| <b>North Africa and Middle East</b> | 14.09%<br>(13.89% - 14.29%) | 13.40%<br>(13.25% - 13.56%) | 11.57%<br>(11.43% - 11.71%) | 10.42%<br>(10.27% - 10.58%) | 3.96%<br>(3.83% - 4.09%) | 4.40%<br>(4.27% - 4.53%) | 3.70%<br>(3.57% - 3.83%) | 3.34%<br>(3.19% - 3.49%) | 0.71%<br>(0.64% - 0.78%) | 1.05%<br>(0.95% - 1.15%) | 0.81%<br>(0.72% - 0.89%) | 0.73%<br>(0.64% - 0.82%) |
| <b>North Africa and Middle East</b> | 14.09%<br>(13.89% - 14.29%) | 13.40%<br>(13.25% - 13.56%) | 11.57%<br>(11.43% - 11.71%) | 10.42%<br>(10.27% - 10.58%) | 3.96%<br>(3.83% - 4.09%) | 4.40%<br>(4.27% - 4.53%) | 3.70%<br>(3.57% - 3.83%) | 3.34%<br>(3.19% - 3.49%) | 0.71%<br>(0.64% - 0.78%) | 1.05%<br>(0.95% - 1.15%) | 0.81%<br>(0.72% - 0.89%) | 0.73%<br>(0.64% - 0.82%) |
| <i>Algeria</i>                      | 12.86%<br>(12.09% - 13.68%) | 10.63%<br>(9.97% - 11.34%)  | 5.38%<br>(4.99% - 5.79%)    | 3.98%<br>(3.64% - 4.32%)    | 2.72%<br>(2.31% - 3.16%) | 2.04%<br>(1.74% - 2.41%) | 0.60%<br>(0.49% - 0.72%) | 0.36%<br>(0.28% - 0.44%) | 0.18%<br>(0.10% - 0.27%) | 0.08%<br>(0.04% - 0.15%) | 0.00%<br>(0.00% - 0.01%) | 0.00%<br>(0.00% - 0.00%) |
| <i>Bahrain</i>                      | 7.12%<br>(6.61% - 7.64%)    | 6.15%<br>(5.69% - 6.65%)    | 5.04%<br>(4.69% - 5.43%)    | 4.61%<br>(4.26% - 4.99%)    | 1.00%<br>(0.83% - 1.19%) | 0.87%<br>(0.73% - 1.03%) | 0.69%<br>(0.58% - 0.82%) | 0.63%<br>(0.52% - 0.75%) | 0.00%<br>(0.00% - 0.01%) | 0.00%<br>(0.00% - 0.00%) | 0.00%<br>(0.00% - 0.00%) | 0.00%<br>(0.00% - 0.00%) |
| <i>Egypt</i>                        | 10.59%<br>(10.06% - 11.18%) | 8.02%<br>(7.61% - 8.47%)    | 5.92%<br>(5.57% - 6.30%)    | 4.41%<br>(4.12% - 4.76%)    | 2.23%<br>(1.98% - 2.48%) | 1.44%<br>(1.29% - 1.61%) | 0.89%<br>(0.78% - 1.02%) | 0.56%<br>(0.48% - 0.67%) | 0.17%<br>(0.13% - 0.22%) | 0.09%<br>(0.07% - 0.11%) | 0.03%<br>(0.02% - 0.04%) | 0.01%<br>(0.00% - 0.01%) |
| <i>Iran (Islamic Republic of)</i>   | 13.54%<br>(12.86% - 14.23%) | 9.72%<br>(9.22% - 10.19%)   | 7.71%<br>(7.21% - 8.22%)    | 6.82%<br>(6.33% - 7.35%)    | 3.37%<br>(2.95% - 3.82%) | 2.17%<br>(1.93% - 2.42%) | 1.61%<br>(1.39% - 1.88%) | 1.39%<br>(1.19% - 1.64%) | 0.45%<br>(0.34% - 0.57%) | 0.22%<br>(0.17% - 0.28%) | 0.14%<br>(0.09% - 0.20%) | 0.11%<br>(0.07% - 0.17%) |
| <i>Iraq</i>                         | 12.44%<br>(11.75% - 13.10%) | 12.01%<br>(11.42% - 12.62%) | 8.22%<br>(7.73% - 8.71%)    | 5.75%<br>(5.35% - 6.21%)    | 2.60%<br>(2.26% - 2.94%) | 2.60%<br>(2.34% - 2.89%) | 1.46%<br>(1.28% - 1.66%) | 0.83%<br>(0.71% - 0.97%) | 0.19%<br>(0.13% - 0.25%) | 0.21%<br>(0.17% - 0.27%) | 0.07%<br>(0.05% - 0.09%) | 0.02%<br>(0.01% - 0.03%) |
| <i>Jordan</i>                       | 4.83%<br>(4.53% - 5.17%)    | 3.73%<br>(3.48% - 3.99%)    | 2.76%<br>(2.55% - 2.97%)    | 2.61%<br>(2.37% - 2.84%)    | 0.31%<br>(0.24% - 0.39%) | 0.17%<br>(0.12% - 0.22%) | 0.07%<br>(0.04% - 0.12%) | 0.07%<br>(0.03% - 0.12%) | 0.00%<br>(0.00% - 0.00%) | 0.00%<br>(0.00% - 0.00%) | 0.00%<br>(0.00% - 0.00%) | 0.00%<br>(0.00% - 0.00%) |
| <i>Kuwait</i>                       | 3.68%<br>(3.41% - 3.97%)    | 2.36%<br>(2.19% - 2.55%)    | 1.96%<br>(1.82% - 2.11%)    | 1.86%<br>(1.72% - 2.02%)    | 0.18%<br>(0.13% - 0.24%) | 0.07%<br>(0.05% - 0.09%) | 0.07%<br>(0.05% - 0.08%) | 0.07%<br>(0.05% - 0.08%) | 0.00%<br>(0.00% - 0.00%) | 0.00%<br>(0.00% - 0.00%) | 0.00%<br>(0.00% - 0.00%) | 0.00%<br>(0.00% - 0.00%) |
| <i>Lebanon</i>                      | 5.74%<br>(5.30% - 6.24%)    | 4.36%<br>(4.03% - 4.72%)    | 3.75%<br>(3.46% - 4.05%)    | 3.29%<br>(3.00% - 3.57%)    | 0.43%<br>(0.32% - 0.56%) | 0.32%<br>(0.24% - 0.41%) | 0.27%<br>(0.20% - 0.35%) | 0.23%<br>(0.16% - 0.30%) | 0.00%<br>(0.00% - 0.00%) | 0.00%<br>(0.00% - 0.00%) | 0.00%<br>(0.00% - 0.00%) | 0.00%<br>(0.00% - 0.00%) |
| <i>Libya</i>                        | 5.48%<br>(5.10% - 5.87%)    | 4.70%<br>(4.38% - 5.04%)    | 4.57%<br>(4.26% - 4.90%)    | 4.78%<br>(4.43% - 5.14%)    | 0.48%<br>(0.39% - 0.58%) | 0.49%<br>(0.41% - 0.58%) | 0.58%<br>(0.49% - 0.68%) | 0.59%<br>(0.49% - 0.70%) | 0.00%<br>(0.00% - 0.00%) | 0.00%<br>(0.00% - 0.01%) | 0.01%<br>(0.00% - 0.02%) | 0.01%<br>(0.00% - 0.01%) |
| <i>Morocco</i>                      | 9.47%<br>(8.97% - 9.94%)    | 7.73%<br>(7.31% - 8.16%)    | 4.57%<br>(4.26% - 4.90%)    | 3.28%<br>(3.04% - 3.56%)    | 1.65%<br>(1.44% - 1.87%) | 1.21%<br>(1.05% - 1.40%) | 0.43%<br>(0.35% - 0.52%) | 0.24%<br>(0.19% - 0.30%) | 0.04%<br>(0.02% - 0.07%) | 0.02%<br>(0.01% - 0.03%) | 0.00%<br>(0.00% - 0.00%) | 0.00%<br>(0.00% - 0.00%) |
| <i>Palestine</i>                    | 4.99%<br>(4.64% - 5.34%)    | 3.83%<br>(3.54% - 4.11%)    | 3.23%<br>(3.00% - 3.48%)    | 2.14%<br>(1.96% - 2.33%)    | 0.32%<br>(0.25% - 0.41%) | 0.21%<br>(0.15% - 0.27%) | 0.15%<br>(0.10% - 0.20%) | 0.04%<br>(0.02% - 0.07%) | 0.00%<br>(0.00% - 0.00%) | 0.00%<br>(0.00% - 0.00%) | 0.00%<br>(0.00% - 0.00%) | 0.00%<br>(0.00% - 0.00%) |
| <i>Oman</i>                         | 18.03%<br>(17.44% - 18.68%) | 12.64%<br>(12.14% - 13.15%) | 9.42%<br>(9.00% - 9.84%)    | 8.82%<br>(8.26% - 9.40%)    | 4.79%<br>(4.29% - 5.35%) | 2.70%<br>(2.40% - 3.03%) | 1.63%<br>(1.43% - 1.83%) | 1.64%<br>(1.41% - 1.89%) | 0.58%<br>(0.42% - 0.78%) | 0.19%<br>(0.11% - 0.27%) | 0.02%<br>(0.00% - 0.05%) | 0.03%<br>(0.01% - 0.08%) |
| <i>Qatar</i>                        | 5.99%<br>(5.55% - 6.47%)    | 5.01%<br>(4.64% - 5.41%)    | 4.04%<br>(3.75% - 4.37%)    | 3.68%<br>(3.40% - 4.00%)    | 0.68%<br>(0.55% - 0.82%) | 0.57%<br>(0.46% - 0.69%) | 0.44%<br>(0.36% - 0.54%) | 0.42%<br>(0.34% - 0.50%) | 0.00%<br>(0.00% - 0.00%) | 0.00%<br>(0.00% - 0.00%) | 0.00%<br>(0.00% - 0.00%) | 0.00%<br>(0.00% - 0.00%) |
| <i>Saudi Arabia</i>                 | 13.55%<br>(12.82% - 14.27%) | 8.58%<br>(8.08% - 9.17%)    | 5.88%<br>(5.41% - 6.34%)    | 4.97%<br>(4.55% - 5.41%)    | 3.00%<br>(2.62% - 3.44%) | 1.51%<br>(1.29% - 1.77%) | 0.86%<br>(0.69% - 1.04%) | 0.71%<br>(0.58% - 0.87%) | 0.23%<br>(0.14% - 0.33%) | 0.03%<br>(0.00% - 0.07%) | 0.00%<br>(0.00% - 0.01%) | 0.00%<br>(0.00% - 0.00%) |

**Table S8c. Estimated overall, severe, and extreme underweight prevalence (%) in children under 5 years, both sexes, in 1990, 2000, 2010, and 2020.**

| Location                       | Total                       |                             |                             |                             | Severe                      |                             |                             |                             | Extreme                     |                             |                           |                          |
|--------------------------------|-----------------------------|-----------------------------|-----------------------------|-----------------------------|-----------------------------|-----------------------------|-----------------------------|-----------------------------|-----------------------------|-----------------------------|---------------------------|--------------------------|
|                                | 1990                        | 2000                        | 2010                        | 2020                        | 1990                        | 2000                        | 2010                        | 2020                        | 1990                        | 2000                        | 2010                      | 2020                     |
| Syrian Arab Republic           | 12.62%<br>(11.87% - 13.36%) | 10.42%<br>(9.88% - 10.99%)  | 9.25%<br>(8.71% - 9.84%)    | 9.65%<br>(9.06% - 10.28%)   | 2.89%<br>(2.51% - 3.30%)    | 2.45%<br>(2.18% - 2.76%)    | 2.18%<br>(1.93% - 2.46%)    | 2.38%<br>(2.08% - 2.70%)    | 0.29%<br>(0.21% - 0.38%)    | 0.23%<br>(0.17% - 0.30%)    | 0.20%<br>(0.14% - 0.27%)  | 0.25%<br>(0.17% - 0.33%) |
| Tunisia                        | 7.01%<br>(6.64% - 7.44%)    | 4.04%<br>(3.81% - 4.27%)    | 2.47%<br>(2.29% - 2.65%)    | 1.93%<br>(1.80% - 2.08%)    | 0.90%<br>(0.78% - 1.05%)    | 0.28%<br>(0.23% - 0.33%)    | 0.09%<br>(0.06% - 0.11%)    | 0.06%<br>(0.05% - 0.08%)    | 0.00%<br>(0.00% - 0.01%)    | 0.00%<br>(0.00% - 0.00%)    | 0.00%<br>(0.00% - 0.00%)  | 0.00%<br>(0.00% - 0.00%) |
| Turkey                         | 7.37%<br>(6.86% - 7.89%)    | 5.04%<br>(4.68% - 5.41%)    | 2.51%<br>(2.30% - 2.74%)    | 2.12%<br>(1.91% - 2.32%)    | 0.85%<br>(0.69% - 1.02%)    | 0.45%<br>(0.35% - 0.55%)    | 0.09%<br>(0.04% - 0.13%)    | 0.06%<br>(0.03% - 0.10%)    | 0.00%<br>(0.00% - 0.00%)    | 0.00%<br>(0.00% - 0.00%)    | 0.00%<br>(0.00% - 0.00%)  | 0.00%<br>(0.00% - 0.00%) |
| United Arab Emirates           | 6.70%<br>(6.19% - 7.22%)    | 5.59%<br>(5.15% - 6.02%)    | 5.05%<br>(4.68% - 5.45%)    | 4.79%<br>(4.42% - 5.20%)    | 0.97%<br>(0.80% - 1.16%)    | 0.75%<br>(0.62% - 0.90%)    | 0.62%<br>(0.51% - 0.75%)    | 0.58%<br>(0.47% - 0.71%)    | 0.00%<br>(0.00% - 0.01%)    | 0.00%<br>(0.00% - 0.00%)    | 0.00%<br>(0.00% - 0.00%)  | 0.00%<br>(0.00% - 0.00%) |
| Yemen                          | 32.73%<br>(31.83% - 33.71%) | 35.20%<br>(34.44% - 36.08%) | 33.85%<br>(33.09% - 34.67%) | 32.51%<br>(31.77% - 33.37%) | 11.99%<br>(10.97% - 13.03%) | 15.66%<br>(14.62% - 16.72%) | 13.67%<br>(12.79% - 14.56%) | 12.96%<br>(11.91% - 14.09%) | 2.45%<br>(1.96% - 3.06%)    | 4.29%<br>(3.47% - 5.18%)    | 3.09%<br>(2.50% - 3.77%)  | 2.92%<br>(2.30% - 3.70%) |
| Afghanistan                    | 27.61%<br>(26.87% - 28.33%) | 29.31%<br>(28.77% - 29.92%) | 25.91%<br>(25.21% - 26.55%) | 22.64%<br>(21.85% - 23.41%) | 12.18%<br>(11.23% - 13.21%) | 13.97%<br>(13.21% - 14.87%) | 10.98%<br>(10.20% - 11.78%) | 8.95%<br>(8.14% - 9.83%)    | 3.52%<br>(2.89% - 4.27%)    | 4.54%<br>(3.94% - 5.28%)    | 2.96%<br>(2.47% - 3.48%)  | 2.19%<br>(1.75% - 2.68%) |
| Sudan                          | 31.98%<br>(31.18% - 32.76%) | 30.70%<br>(30.06% - 31.42%) | 28.28%<br>(27.69% - 28.91%) | 25.60%<br>(24.87% - 26.31%) | 14.54%<br>(13.59% - 15.55%) | 14.24%<br>(13.28% - 15.25%) | 12.07%<br>(11.20% - 12.97%) | 10.85%<br>(10.00% - 11.76%) | 4.19%<br>(3.49% - 4.99%)    | 4.32%<br>(3.59% - 5.19%)    | 3.22%<br>(2.61% - 3.87%)  | 2.93%<br>(2.35% - 3.57%) |
| <b>South Asia</b>              | 40.98%<br>(40.62% - 41.34%) | 37.59%<br>(37.40% - 37.80%) | 33.54%<br>(33.38% - 33.72%) | 28.08%<br>(27.89% - 28.28%) | 19.27%<br>(18.91% - 19.64%) | 19.34%<br>(19.05% - 19.65%) | 16.38%<br>(16.14% - 16.61%) | 12.54%<br>(12.28% - 12.80%) | 6.12%<br>(5.72% - 6.55%)    | 7.16%<br>(6.80% - 7.52%)    | 5.57%<br>(5.34% - 5.82%)  | 3.85%<br>(3.65% - 4.06%) |
| <b>South Asia</b>              | 40.98%<br>(40.62% - 41.34%) | 37.59%<br>(37.40% - 37.80%) | 33.54%<br>(33.38% - 33.72%) | 28.08%<br>(27.89% - 28.28%) | 19.27%<br>(18.91% - 19.64%) | 19.34%<br>(19.05% - 19.65%) | 16.38%<br>(16.14% - 16.61%) | 12.54%<br>(12.28% - 12.80%) | 6.12%<br>(5.72% - 6.55%)    | 7.16%<br>(6.80% - 7.52%)    | 5.57%<br>(5.34% - 5.82%)  | 3.85%<br>(3.65% - 4.06%) |
| Bangladesh                     | 45.87%<br>(43.72% - 47.83%) | 35.80%<br>(35.29% - 36.29%) | 29.77%<br>(29.20% - 30.33%) | 25.18%<br>(24.52% - 25.90%) | 15.38%<br>(13.91% - 16.89%) | 16.98%<br>(15.83% - 18.18%) | 12.27%<br>(11.41% - 13.25%) | 8.97%<br>(8.14% - 9.87%)    | 2.47%<br>(1.88% - 3.22%)    | 5.14%<br>(4.26% - 6.18%)    | 3.04%<br>(2.50% - 3.74%)  | 1.76%<br>(1.35% - 2.26%) |
| Bhutan                         | 23.22%<br>(22.49% - 23.95%) | 15.52%<br>(14.74% - 16.30%) | 11.21%<br>(10.59% - 11.84%) | 8.67%<br>(8.03% - 9.30%)    | 5.95%<br>(5.27% - 6.60%)    | 2.56%<br>(2.06% - 3.06%)    | 1.77%<br>(1.47% - 2.07%)    | 1.36%<br>(1.11% - 1.62%)    | 0.64%<br>(0.46% - 0.84%)    | 0.09%<br>(0.03% - 0.17%)    | 0.03%<br>(0.01% - 0.06%)  | 0.01%<br>(0.00% - 0.04%) |
| India                          | 41.61%<br>(41.26% - 41.96%) | 38.94%<br>(38.74% - 39.17%) | 34.79%<br>(34.62% - 34.97%) | 29.15%<br>(28.97% - 29.33%) | 20.62%<br>(20.20% - 21.06%) | 20.77%<br>(20.46% - 21.10%) | 17.68%<br>(17.41% - 17.96%) | 13.64%<br>(13.37% - 13.90%) | 6.96%<br>(6.45% - 7.52%)    | 8.08%<br>(7.64% - 8.55%)    | 6.28%<br>(6.00% - 6.60%)  | 4.37%<br>(4.15% - 4.59%) |
| <i>Other Union Territories</i> | 36.54%<br>(35.48% - 37.73%) | 32.23%<br>(31.41% - 33.13%) | 25.77%<br>(25.12% - 26.42%) | 21.06%<br>(20.38% - 21.71%) | 11.19%<br>(10.26% - 12.14%) | 10.32%<br>(9.52% - 11.11%)  | 8.52%<br>(7.83% - 9.20%)    | 6.60%<br>(5.97% - 7.24%)    | 1.33%<br>(0.99% - 1.74%)    | 1.52%<br>(1.15% - 1.94%)    | 1.51%<br>(1.18% - 1.89%)  | 1.12%<br>(0.87% - 1.42%) |
| <i>Andhra Pradesh</i>          | 38.85%<br>(37.75% - 40.15%) | 35.23%<br>(34.58% - 36.00%) | 30.13%<br>(29.59% - 30.63%) | 25.09%<br>(24.53% - 25.68%) | 16.29%<br>(15.09% - 17.40%) | 16.02%<br>(15.08% - 17.00%) | 13.84%<br>(13.09% - 14.63%) | 10.86%<br>(10.13% - 11.65%) | 3.77%<br>(2.96% - 4.71%)    | 4.51%<br>(3.69% - 5.40%)    | 4.24%<br>(3.65% - 4.96%)  | 3.17%<br>(2.65% - 3.79%) |
| <i>Arunachal Pradesh</i>       | 28.04%<br>(27.18% - 28.89%) | 24.85%<br>(24.08% - 25.64%) | 26.20%<br>(25.52% - 26.83%) | 22.59%<br>(21.88% - 23.30%) | 9.24%<br>(8.25% - 10.17%)   | 7.81%<br>(6.99% - 8.68%)    | 10.27%<br>(9.45% - 11.11%)  | 8.57%<br>(7.84% - 9.34%)    | 1.72%<br>(1.31% - 2.18%)    | 1.35%<br>(1.00% - 1.72%)    | 2.51%<br>(2.07% - 3.01%)  | 2.04%<br>(1.65% - 2.46%) |
| <i>Assam</i>                   | 35.88%<br>(35.20% - 36.57%) | 33.23%<br>(32.64% - 33.86%) | 29.56%<br>(28.94% - 30.14%) | 24.09%<br>(23.39% - 24.77%) | 19.39%<br>(18.20% - 20.81%) | 16.84%<br>(15.91% - 17.90%) | 13.55%<br>(12.70% - 14.45%) | 9.93%<br>(9.18% - 10.72%)   | 7.53%<br>(6.31% - 9.16%)    | 5.94%<br>(5.08% - 6.99%)    | 4.13%<br>(3.49% - 4.86%)  | 2.63%<br>(2.17% - 3.16%) |
| <i>Bihar</i>                   | 43.85%<br>(43.06% - 44.77%) | 42.47%<br>(41.83% - 43.35%) | 39.57%<br>(38.97% - 40.26%) | 33.67%<br>(32.99% - 34.33%) | 28.43%<br>(26.57% - 30.30%) | 26.43%<br>(25.22% - 27.70%) | 22.28%<br>(21.14% - 23.38%) | 17.33%<br>(16.28% - 18.42%) | 14.64%<br>(11.96% - 17.56%) | 12.60%<br>(10.73% - 14.59%) | 9.04%<br>(7.64% - 10.45%) | 6.28%<br>(5.30% - 7.33%) |
| <i>Chhattisgarh</i>            | 42.68%<br>(41.37% - 44.29%) | 40.48%<br>(39.49% - 41.76%) | 36.93%<br>(36.27% - 37.66%) | 29.92%<br>(29.37% - 30.48%) | 18.66%<br>(17.24% - 20.25%) | 18.77%<br>(17.43% - 20.25%) | 17.81%<br>(16.74% - 18.95%) | 13.91%<br>(13.05% - 14.77%) | 4.53%<br>(3.43% - 6.14%)    | 5.27%<br>(4.12% - 6.77%)    | 5.54%<br>(4.53% - 6.63%)  | 4.33%<br>(3.65% - 5.01%) |
| <i>Delhi</i>                   | 35.47%<br>(34.67% - 36.32%) | 31.86%<br>(31.24% - 32.53%) | 27.71%<br>(27.05% - 28.35%) | 23.09%<br>(22.37% - 23.85%) | 15.40%<br>(14.20% - 16.59%) | 14.15%<br>(13.26% - 15.11%) | 12.17%<br>(11.40% - 12.94%) | 9.38%<br>(8.58% - 10.18%)   | 3.99%<br>(3.15% - 4.95%)    | 3.92%<br>(3.27% - 4.66%)    | 3.44%<br>(2.90% - 3.99%)  | 2.42%<br>(1.96% - 2.91%) |
| <i>Goa</i>                     | 29.84%<br>(29.11% - 30.62%) | 23.89%<br>(23.32% - 24.54%) | 20.15%<br>(19.56% - 20.77%) | 17.84%<br>(17.20% - 18.49%) | 10.22%<br>(9.39% - 11.08%)  | 7.45%<br>(6.75% - 8.16%)    | 7.12%<br>(6.53% - 7.76%)    | 6.28%<br>(5.64% - 6.93%)    | 1.82%<br>(1.37% - 2.36%)    | 1.21%<br>(0.90% - 1.55%)    | 1.55%<br>(1.25% - 1.87%)  | 1.39%<br>(1.06% - 1.74%) |
| <i>Gujarat</i>                 | 44.40%<br>(42.78% - 46.05%) | 39.80%<br>(38.88% - 40.90%) | 34.73%<br>(34.21% - 35.25%) | 29.33%<br>(28.76% - 29.88%) | 18.56%<br>(17.30% - 19.76%) | 17.97%<br>(17.11% - 18.92%) | 16.91%<br>(16.11% - 17.71%) | 13.73%<br>(12.86% - 14.68%) | 3.92%<br>(3.05% - 4.95%)    | 4.81%<br>(3.99% - 5.89%)    | 5.79%<br>(4.95% - 6.68%)  | 4.63%<br>(3.88% - 5.50%) |
| <i>Haryana</i>                 | 33.34%<br>(32.65% - 34.07%) | 31.95%<br>(31.38% - 32.52%) | 30.10%<br>(29.55% - 30.62%) | 25.44%<br>(24.81% - 26.06%) | 13.63%<br>(12.63% - 14.67%) | 14.06%<br>(13.33% - 14.87%) | 13.97%<br>(13.23% - 14.68%) | 11.03%<br>(10.29% - 11.71%) | 3.19%<br>(2.53% - 4.02%)    | 3.85%<br>(3.29% - 4.47%)    | 4.29%<br>(3.73% - 4.83%)  | 3.12%<br>(2.67% - 3.58%) |
| <i>Himachal Pradesh</i>        | 34.65%<br>(33.82% - 35.56%) | 31.34%<br>(30.75% - 31.95%) | 26.83%<br>(26.23% - 27.42%) | 20.54%<br>(19.79% - 21.24%) | 14.79%<br>(13.63% - 16.08%) | 13.67%<br>(12.81% - 14.51%) | 10.77%<br>(10.04% - 11.54%) | 7.04%<br>(6.31% - 7.72%)    | 3.71%<br>(2.88% - 4.77%)    | 3.73%<br>(3.07% - 4.37%)    | 2.62%<br>(2.16% - 3.12%)  | 1.36%<br>(1.05% - 1.69%) |

**Table S8c. Estimated overall, severe, and extreme underweight prevalence (%) in children under 5 years, both sexes, in 1990, 2000, 2010, and 2020.**

| Location                              | Total                       |                             |                             |                             | Severe                      |                             |                             |                             | Extreme                     |                             |                          |                          |
|---------------------------------------|-----------------------------|-----------------------------|-----------------------------|-----------------------------|-----------------------------|-----------------------------|-----------------------------|-----------------------------|-----------------------------|-----------------------------|--------------------------|--------------------------|
|                                       | 1990                        | 2000                        | 2010                        | 2020                        | 1990                        | 2000                        | 2010                        | 2020                        | 1990                        | 2000                        | 2010                     | 2020                     |
| <i>Jammu &amp; Kashmir and Ladakh</i> | 31.89%<br>(31.23% - 32.57%) | 27.06%<br>(26.43% - 27.73%) | 21.15%<br>(20.45% - 21.77%) | 16.19%<br>(15.49% - 16.88%) | 13.91%<br>(12.93% - 14.99%) | 10.76%<br>(9.91% - 11.54%)  | 7.44%<br>(6.76% - 8.07%)    | 5.06%<br>(4.52% - 5.62%)    | 3.79%<br>(3.05% - 4.62%)    | 2.58%<br>(2.08% - 3.07%)    | 1.52%<br>(1.20% - 1.83%) | 0.85%<br>(0.66% - 1.09%) |
| <i>Jharkhand</i>                      | 47.07%<br>(45.49% - 49.00%) | 45.12%<br>(43.74% - 46.69%) | 40.98%<br>(40.14% - 42.00%) | 34.26%<br>(33.71% - 34.83%) | 23.40%<br>(21.76% - 25.16%) | 23.77%<br>(22.41% - 25.24%) | 21.34%<br>(19.95% - 22.73%) | 17.91%<br>(16.98% - 18.94%) | 7.13%<br>(5.44% - 9.38%)    | 8.31%<br>(6.58% - 10.37%)   | 7.43%<br>(5.95% - 9.10%) | 6.64%<br>(5.67% - 7.74%) |
| <i>Karnataka</i>                      | 40.11%<br>(39.43% - 40.86%) | 37.70%<br>(37.06% - 38.48%) | 33.49%<br>(33.02% - 33.97%) | 28.76%<br>(28.22% - 29.30%) | 21.03%<br>(19.87% - 22.22%) | 18.44%<br>(17.49% - 19.44%) | 16.67%<br>(15.99% - 17.36%) | 13.41%<br>(12.63% - 14.18%) | 7.60%<br>(6.25% - 9.12%)    | 5.81%<br>(4.87% - 6.88%)    | 5.67%<br>(5.04% - 6.34%) | 4.28%<br>(3.68% - 4.92%) |
| <i>Kerala</i>                         | 30.44%<br>(29.51% - 31.55%) | 27.18%<br>(26.51% - 27.87%) | 22.13%<br>(21.54% - 22.69%) | 17.62%<br>(16.94% - 18.25%) | 8.95%<br>(8.03% - 9.83%)    | 8.78%<br>(8.02% - 9.54%)    | 7.15%<br>(6.56% - 7.71%)    | 5.08%<br>(4.53% - 5.63%)    | 1.17%<br>(0.85% - 1.55%)    | 1.42%<br>(1.10% - 1.79%)    | 1.23%<br>(1.00% - 1.49%) | 0.73%<br>(0.56% - 0.94%) |
| <i>Madhya Pradesh</i>                 | 47.71%<br>(45.98% - 49.56%) | 45.04%<br>(43.90% - 46.45%) | 40.87%<br>(40.03% - 41.88%) | 33.15%<br>(32.52% - 33.75%) | 23.87%<br>(22.19% - 25.60%) | 25.23%<br>(23.88% - 26.61%) | 21.23%<br>(20.04% - 22.47%) | 16.53%<br>(15.64% - 17.43%) | 7.05%<br>(5.41% - 9.46%)    | 9.68%<br>(7.80% - 11.86%)   | 7.36%<br>(5.99% - 8.98%) | 5.69%<br>(4.90% - 6.58%) |
| <i>Maharashtra</i>                    | 44.41%<br>(42.93% - 46.07%) | 39.06%<br>(38.26% - 40.02%) | 32.90%<br>(32.41% - 33.37%) | 28.15%<br>(27.61% - 28.68%) | 19.14%<br>(17.89% - 20.39%) | 18.11%<br>(17.23% - 19.13%) | 15.76%<br>(15.03% - 16.50%) | 12.83%<br>(12.12% - 13.56%) | 4.28%<br>(3.28% - 5.57%)    | 5.10%<br>(4.22% - 6.18%)    | 5.01%<br>(4.34% - 5.70%) | 3.91%<br>(3.38% - 4.51%) |
| <i>Manipur</i>                        | 21.49%<br>(20.73% - 22.20%) | 18.91%<br>(18.22% - 19.61%) | 18.78%<br>(18.12% - 19.41%) | 15.53%<br>(14.89% - 16.17%) | 5.83%<br>(5.12% - 6.57%)    | 5.13%<br>(4.55% - 5.75%)    | 5.88%<br>(5.24% - 6.46%)    | 4.49%<br>(3.99% - 5.02%)    | 0.82%<br>(0.54% - 1.16%)    | 0.74%<br>(0.51% - 1.00%)    | 1.04%<br>(0.75% - 1.34%) | 0.68%<br>(0.48% - 0.89%) |
| <i>Meghalaya</i>                      | 38.57%<br>(37.61% - 39.72%) | 37.05%<br>(36.09% - 38.09%) | 35.55%<br>(34.84% - 36.23%) | 29.89%<br>(29.26% - 30.55%) | 17.40%<br>(16.18% - 18.59%) | 16.28%<br>(15.32% - 17.34%) | 17.42%<br>(16.46% - 18.45%) | 13.59%<br>(12.66% - 14.55%) | 4.63%<br>(3.62% - 5.73%)    | 4.39%<br>(3.52% - 5.45%)    | 5.72%<br>(4.86% - 6.79%) | 4.05%<br>(3.36% - 4.87%) |
| <i>Mizoram</i>                        | 21.09%<br>(20.32% - 21.83%) | 18.29%<br>(17.58% - 18.96%) | 17.38%<br>(16.80% - 17.98%) | 13.60%<br>(12.98% - 14.19%) | 4.65%<br>(3.92% - 5.38%)    | 3.86%<br>(3.33% - 4.42%)    | 4.66%<br>(4.15% - 5.20%)    | 3.33%<br>(2.91% - 3.77%)    | 0.42%<br>(0.28% - 0.63%)    | 0.31%<br>(0.21% - 0.45%)    | 0.60%<br>(0.42% - 0.80%) | 0.36%<br>(0.24% - 0.50%) |
| <i>Nagaland</i>                       | 22.97%<br>(22.19% - 23.81%) | 20.56%<br>(19.73% - 21.28%) | 21.16%<br>(20.49% - 21.84%) | 18.07%<br>(17.47% - 18.78%) | 7.02%<br>(6.11% - 7.91%)    | 5.85%<br>(5.15% - 6.56%)    | 7.06%<br>(6.41% - 7.74%)    | 5.62%<br>(5.06% - 6.25%)    | 1.08%<br>(0.71% - 1.49%)    | 0.77%<br>(0.54% - 1.05%)    | 1.30%<br>(0.99% - 1.65%) | 0.94%<br>(0.69% - 1.23%) |
| <i>Odisha</i>                         | 41.19%<br>(40.22% - 42.36%) | 39.29%<br>(38.56% - 40.09%) | 34.06%<br>(33.43% - 34.73%) | 27.66%<br>(26.98% - 28.36%) | 21.26%<br>(19.71% - 22.76%) | 20.49%<br>(19.55% - 21.51%) | 15.22%<br>(14.32% - 16.19%) | 11.52%<br>(10.62% - 12.47%) | 7.21%<br>(5.61% - 8.95%)    | 7.16%<br>(6.02% - 8.31%)    | 4.19%<br>(3.46% - 4.99%) | 2.98%<br>(2.42% - 3.60%) |
| <i>Punjab</i>                         | 33.43%<br>(32.86% - 34.08%) | 31.68%<br>(31.22% - 32.16%) | 28.19%<br>(27.75% - 28.66%) | 22.26%<br>(21.70% - 22.83%) | 14.96%<br>(14.17% - 15.79%) | 15.70%<br>(15.09% - 16.37%) | 13.88%<br>(13.30% - 14.47%) | 9.04%<br>(8.48% - 9.60%)    | 4.21%<br>(3.65% - 4.81%)    | 5.41%<br>(4.88% - 6.00%)    | 4.90%<br>(4.44% - 5.39%) | 2.37%<br>(2.07% - 2.68%) |
| <i>Rajasthan</i>                      | 42.14%<br>(41.59% - 42.77%) | 42.31%<br>(41.89% - 42.73%) | 36.36%<br>(35.88% - 36.86%) | 29.30%<br>(28.73% - 29.87%) | 26.84%<br>(25.27% - 28.45%) | 29.17%<br>(28.11% - 30.16%) | 24.47%<br>(19.31% - 21.27%) | 13.94%<br>(13.12% - 14.86%) | 13.49%<br>(11.30% - 15.87%) | 16.94%<br>(15.22% - 18.48%) | 8.29%<br>(7.25% - 9.46%) | 4.53%<br>(3.87% - 5.32%) |
| <i>Sikkim</i>                         | 21.52%<br>(20.55% - 22.45%) | 19.25%<br>(18.33% - 20.09%) | 17.87%<br>(17.15% - 18.56%) | 13.96%<br>(13.34% - 14.56%) | 5.04%<br>(4.19% - 5.88%)    | 4.75%<br>(4.02% - 5.49%)    | 5.19%<br>(4.61% - 5.78%)    | 3.82%<br>(3.41% - 4.27%)    | 0.55%<br>(0.36% - 0.81%)    | 0.57%<br>(0.39% - 0.81%)    | 0.80%<br>(0.60% - 1.01%) | 0.52%<br>(0.39% - 0.68%) |
| <i>Tamil Nadu</i>                     | 38.00%<br>(36.98% - 39.32%) | 33.05%<br>(32.42% - 33.69%) | 27.81%<br>(27.29% - 28.31%) | 22.52%<br>(21.93% - 23.10%) | 14.79%<br>(13.84% - 15.81%) | 14.26%<br>(13.57% - 15.06%) | 11.47%<br>(10.89% - 12.16%) | 8.50%<br>(7.89% - 9.11%)    | 3.06%<br>(2.47% - 3.73%)    | 3.72%<br>(3.20% - 4.32%)    | 2.91%<br>(2.54% - 3.35%) | 1.96%<br>(1.64% - 2.30%) |
| <i>Telangana</i>                      | 39.05%<br>(38.14% - 40.18%) | 35.48%<br>(34.93% - 36.07%) | 30.92%<br>(30.39% - 31.43%) | 25.00%<br>(24.43% - 25.60%) | 17.07%<br>(15.33% - 18.90%) | 17.35%<br>(16.12% - 18.72%) | 15.93%<br>(14.90% - 16.92%) | 11.61%<br>(10.84% - 12.44%) | 4.67%<br>(2.96% - 6.88%)    | 6.15%<br>(4.71% - 7.86%)    | 6.37%<br>(5.34% - 7.44%) | 3.96%<br>(3.38% - 4.64%) |
| <i>Tripura</i>                        | 38.34%<br>(37.36% - 39.44%) | 34.17%<br>(33.45% - 34.87%) | 30.94%<br>(30.35% - 31.55%) | 26.04%<br>(25.38% - 26.77%) | 17.33%<br>(15.94% - 18.93%) | 15.19%<br>(14.16% - 16.28%) | 14.46%<br>(13.64% - 15.33%) | 11.01%<br>(10.20% - 11.82%) | 4.81%<br>(3.72% - 6.24%)    | 4.22%<br>(3.49% - 5.09%)    | 4.48%<br>(3.85% - 5.18%) | 2.98%<br>(2.46% - 3.51%) |
| <i>Uttar Pradesh</i>                  | 44.95%<br>(43.75% - 46.40%) | 41.80%<br>(41.24% - 42.50%) | 38.04%<br>(37.52% - 38.63%) | 32.23%<br>(31.70% - 32.83%) | 25.33%<br>(23.76% - 27.16%) | 25.47%<br>(24.44% - 26.57%) | 20.96%<br>(20.15% - 21.87%) | 15.69%<br>(14.87% - 16.60%) | 9.88%<br>(7.82% - 12.49%)   | 11.69%<br>(10.19% - 13.29%) | 8.20%<br>(7.23% - 9.26%) | 5.14%<br>(4.46% - 5.87%) |
| <i>Uttarakhand</i>                    | 40.42%<br>(39.07% - 42.42%) | 37.89%<br>(37.04% - 38.95%) | 31.51%<br>(30.95% - 32.14%) | 24.24%<br>(23.61% - 24.86%) | 14.08%<br>(12.69% - 15.48%) | 15.41%<br>(14.13% - 16.65%) | 13.87%<br>(12.93% - 14.85%) | 9.86%<br>(9.17% - 10.63%)   | 2.49%<br>(1.77% - 3.44%)    | 3.50%<br>(2.62% - 4.47%)    | 3.86%<br>(3.19% - 4.57%) | 2.56%<br>(2.16% - 3.03%) |
| <i>West Bengal</i>                    | 40.27%<br>(38.91% - 41.94%) | 37.01%<br>(36.21% - 37.94%) | 31.84%<br>(31.29% - 32.45%) | 26.63%<br>(26.03% - 27.23%) | 16.34%<br>(15.14% - 17.61%) | 16.46%<br>(15.53% - 17.38%) | 14.57%<br>(13.78% - 15.44%) | 11.49%<br>(10.70% - 12.21%) | 3.49%<br>(2.69% - 4.51%)    | 4.38%<br>(3.57% - 5.24%)    | 4.36%<br>(3.69% - 5.08%) | 3.26%<br>(2.72% - 3.81%) |
| <i>Nepal</i>                          | 38.02%<br>(36.59% - 39.62%) | 33.82%<br>(32.85% - 34.87%) | 27.28%<br>(26.52% - 28.11%) | 22.30%<br>(21.51% - 23.13%) | 14.18%<br>(13.03% - 15.39%) | 13.03%<br>(12.06% - 14.13%) | 9.08%<br>(8.20% - 10.01%)   | 6.77%<br>(5.93% - 7.63%)    | 2.75%<br>(2.15% - 3.53%)    | 2.75%<br>(2.20% - 3.46%)    | 1.51%<br>(1.12% - 2.00%) | 1.01%<br>(0.71% - 1.36%) |
| <i>Pakistan</i>                       | 33.04%<br>(32.35% - 33.77%) | 32.53%<br>(31.80% - 33.32%) | 30.95%<br>(30.42% - 31.57%) | 26.12%<br>(25.38% - 26.85%) | 15.58%<br>(14.62% - 16.65%) | 14.71%<br>(13.84% - 15.65%) | 13.84%<br>(13.13% - 14.54%) | 10.76%<br>(9.95% - 11.61%)  | 5.03%<br>(4.25% - 5.92%)    | 4.55%<br>(3.87% - 5.37%)    | 4.36%<br>(3.72% - 4.99%) | 3.22%<br>(2.69% - 3.84%) |

Table S8c. Estimated overall, severe, and extreme underweight prevalence (%) in children under 5 years, both sexes, in 1990, 2000, 2010, and 2020.

| Location                                      | Total                       |                             |                             |                             | Severe                     |                           |                           |                          | Extreme                  |                          |                          |                          |
|-----------------------------------------------|-----------------------------|-----------------------------|-----------------------------|-----------------------------|----------------------------|---------------------------|---------------------------|--------------------------|--------------------------|--------------------------|--------------------------|--------------------------|
|                                               | 1990                        | 2000                        | 2010                        | 2020                        | 1990                       | 2000                      | 2010                      | 2020                     | 1990                     | 2000                     | 2010                     | 2020                     |
| <b>Southeast Asia, East Asia, and Oceania</b> | 16.22%<br>(15.72% - 16.73%) | 13.54%<br>(13.26% - 13.83%) | 10.92%<br>(10.75% - 11.11%) | 8.39%<br>(8.21% - 8.56%)    | 4.52%<br>(4.28% - 4.80%)   | 3.87%<br>(3.76% - 4.00%)  | 2.89%<br>(2.81% - 2.97%)  | 2.03%<br>(1.96% - 2.11%) | 0.75%<br>(0.69% - 0.83%) | 0.68%<br>(0.65% - 0.71%) | 0.44%<br>(0.41% - 0.46%) | 0.27%<br>(0.25% - 0.30%) |
| <b>East Asia</b>                              | 11.27%<br>(10.54% - 12.04%) | 6.86%<br>(6.40% - 7.40%)    | 4.12%<br>(3.81% - 4.46%)    | 3.09%<br>(2.84% - 3.36%)    | 2.22%<br>(1.88% - 2.61%)   | 1.05%<br>(0.89% - 1.25%)  | 0.44%<br>(0.36% - 0.54%)  | 0.28%<br>(0.22% - 0.35%) | 0.23%<br>(0.16% - 0.32%) | 0.09%<br>(0.07% - 0.11%) | 0.02%<br>(0.01% - 0.02%) | 0.01%<br>(0.00% - 0.01%) |
| China                                         | 11.03%<br>(10.29% - 11.83%) | 6.32%<br>(5.84% - 6.89%)    | 3.79%<br>(3.47% - 4.14%)    | 2.90%<br>(2.65% - 3.18%)    | 2.09%<br>(1.73% - 2.48%)   | 0.80%<br>(0.64% - 1.01%)  | 0.34%<br>(0.26% - 0.44%)  | 0.23%<br>(0.17% - 0.30%) | 0.20%<br>(0.13% - 0.30%) | 0.03%<br>(0.02% - 0.05%) | 0.01%<br>(0.00% - 0.01%) | 0.00%<br>(0.00% - 0.01%) |
| Democratic People's Republic of Korea         | 29.50%<br>(28.73% - 30.29%) | 26.99%<br>(26.41% - 27.57%) | 17.11%<br>(16.52% - 17.70%) | 13.57%<br>(12.79% - 14.29%) | 10.48%<br>(9.41% - 11.57%) | 9.83%<br>(9.05% - 10.58%) | 4.36%<br>(3.90% - 4.84%)  | 2.74%<br>(2.27% - 3.23%) | 2.00%<br>(1.49% - 2.63%) | 2.00%<br>(1.62% - 2.42%) | 0.46%<br>(0.32% - 0.62%) | 0.14%<br>(0.05% - 0.26%) |
| Taiwan (Province of China)                    | 2.76%<br>(2.50% - 3.02%)    | 3.05%<br>(2.75% - 3.34%)    | 2.95%<br>(2.68% - 3.28%)    | 2.79%<br>(2.54% - 3.07%)    | 0.10%<br>(0.05% - 0.15%)   | 0.25%<br>(0.18% - 0.34%)  | 0.28%<br>(0.21% - 0.37%)  | 0.27%<br>(0.19% - 0.35%) | 0.00%<br>(0.00% - 0.00%) | 0.00%<br>(0.00% - 0.00%) | 0.00%<br>(0.00% - 0.00%) | 0.00%<br>(0.00% - 0.00%) |
| <b>Oceania</b>                                | 18.83%<br>(18.24% - 19.42%) | 18.69%<br>(18.08% - 19.29%) | 20.68%<br>(20.19% - 21.14%) | 18.59%<br>(17.89% - 19.22%) | 5.55%<br>(4.99% - 6.11%)   | 5.68%<br>(5.07% - 6.19%)  | 7.64%<br>(7.14% - 8.18%)  | 5.89%<br>(5.28% - 6.50%) | 0.86%<br>(0.65% - 1.08%) | 0.95%<br>(0.73% - 1.18%) | 1.76%<br>(1.50% - 2.07%) | 1.00%<br>(0.79% - 1.26%) |
| Fiji                                          | 6.83%<br>(6.33% - 7.38%)    | 5.19%<br>(4.79% - 5.62%)    | 4.61%<br>(4.24% - 5.00%)    | 4.16%<br>(3.82% - 4.52%)    | 0.81%<br>(0.65% - 0.99%)   | 0.48%<br>(0.37% - 0.60%)  | 0.38%<br>(0.29% - 0.49%)  | 0.35%<br>(0.26% - 0.45%) | 0.00%<br>(0.00% - 0.00%) | 0.00%<br>(0.00% - 0.00%) | 0.00%<br>(0.00% - 0.00%) | 0.00%<br>(0.00% - 0.00%) |
| Kiribati                                      | 11.55%<br>(10.94% - 12.18%) | 11.83%<br>(11.15% - 12.58%) | 11.67%<br>(11.08% - 12.32%) | 8.40%<br>(7.88% - 8.95%)    | 2.60%<br>(2.30% - 2.95%)   | 2.83%<br>(2.47% - 3.23%)  | 2.74%<br>(2.42% - 3.08%)  | 1.36%<br>(1.16% - 1.59%) | 0.21%<br>(0.14% - 0.29%) | 0.28%<br>(0.19% - 0.39%) | 0.28%<br>(0.20% - 0.38%) | 0.04%<br>(0.02% - 0.08%) |
| Marshall Islands                              | 16.77%<br>(15.99% - 17.47%) | 15.74%<br>(14.95% - 16.47%) | 13.81%<br>(13.05% - 14.59%) | 12.34%<br>(11.56% - 13.13%) | 5.18%<br>(4.61% - 5.76%)   | 4.57%<br>(4.00% - 5.10%)  | 3.83%<br>(3.34% - 4.34%)  | 3.34%<br>(2.89% - 3.82%) | 0.86%<br>(0.67% - 1.08%) | 0.68%<br>(0.50% - 0.86%) | 0.52%<br>(0.38% - 0.68%) | 0.43%<br>(0.31% - 0.58%) |
| Micronesia (Federated States of)              | 11.47%<br>(10.75% - 12.24%) | 8.59%<br>(7.94% - 9.24%)    | 7.79%<br>(7.18% - 8.38%)    | 7.37%<br>(6.80% - 7.93%)    | 2.00%<br>(1.66% - 2.37%)   | 1.10%<br>(0.89% - 1.34%)  | 1.07%<br>(0.87% - 1.29%)  | 1.07%<br>(0.87% - 1.27%) | 0.05%<br>(0.01% - 0.11%) | 0.00%<br>(0.00% - 0.01%) | 0.00%<br>(0.00% - 0.02%) | 0.00%<br>(0.00% - 0.02%) |
| Papua New Guinea                              | 23.20%<br>(22.35% - 24.07%) | 22.69%<br>(21.88% - 23.50%) | 24.73%<br>(24.10% - 25.33%) | 21.35%<br>(20.48% - 22.14%) | 7.24%<br>(6.42% - 8.07%)   | 7.22%<br>(6.39% - 7.93%)  | 9.55%<br>(8.88% - 10.26%) | 6.95%<br>(6.20% - 7.72%) | 1.18%<br>(0.89% - 1.50%) | 1.25%<br>(0.95% - 1.57%) | 2.26%<br>(1.93% - 2.68%) | 1.21%<br>(0.94% - 1.53%) |
| Samoa                                         | 2.29%<br>(2.09% - 2.53%)    | 2.05%<br>(1.87% - 2.27%)    | 2.74%<br>(2.48% - 3.00%)    | 2.83%<br>(2.57% - 3.09%)    | 0.01%<br>(0.00% - 0.02%)   | 0.00%<br>(0.00% - 0.01%)  | 0.09%<br>(0.05% - 0.14%)  | 0.13%<br>(0.08% - 0.19%) | 0.00%<br>(0.00% - 0.00%) | 0.00%<br>(0.00% - 0.00%) | 0.00%<br>(0.00% - 0.00%) | 0.00%<br>(0.00% - 0.00%) |
| Solomon Islands                               | 15.59%<br>(14.80% - 16.40%) | 13.59%<br>(12.87% - 14.37%) | 13.31%<br>(12.68% - 13.97%) | 12.68%<br>(11.98% - 13.40%) | 3.88%<br>(3.32% - 4.45%)   | 3.58%<br>(3.14% - 4.11%)  | 3.77%<br>(3.36% - 4.21%)  | 3.79%<br>(3.34% - 4.30%) | 0.40%<br>(0.23% - 0.58%) | 0.42%<br>(0.29% - 0.59%) | 0.53%<br>(0.40% - 0.68%) | 0.61%<br>(0.45% - 0.80%) |
| Tonga                                         | 2.33%<br>(2.13% - 2.55%)    | 1.88%<br>(1.73% - 2.07%)    | 1.85%<br>(1.69% - 2.04%)    | 1.69%<br>(1.54% - 1.85%)    | 0.01%<br>(0.00% - 0.03%)   | 0.00%<br>(0.00% - 0.01%)  | 0.00%<br>(0.00% - 0.01%)  | 0.00%<br>(0.00% - 0.01%) | 0.00%<br>(0.00% - 0.00%) | 0.00%<br>(0.00% - 0.00%) | 0.00%<br>(0.00% - 0.00%) | 0.00%<br>(0.00% - 0.00%) |
| American Samoa                                | 6.88%<br>(6.42% - 7.36%)    | 5.36%<br>(4.94% - 5.80%)    | 5.15%<br>(4.77% - 5.57%)    | 4.92%<br>(4.56% - 5.32%)    | 1.08%<br>(0.91% - 1.26%)   | 0.65%<br>(0.52% - 0.78%)  | 0.64%<br>(0.53% - 0.77%)  | 0.63%<br>(0.52% - 0.76%) | 0.00%<br>(0.00% - 0.01%) | 0.00%<br>(0.00% - 0.00%) | 0.00%<br>(0.00% - 0.00%) | 0.00%<br>(0.00% - 0.00%) |
| Vanuatu                                       | 12.67%<br>(12.03% - 13.35%) | 10.70%<br>(10.07% - 11.28%) | 10.12%<br>(9.55% - 10.70%)  | 9.53%<br>(8.93% - 10.15%)   | 2.96%<br>(2.61% - 3.33%)   | 2.07%<br>(1.79% - 2.36%)  | 1.82%<br>(1.57% - 2.08%)  | 1.74%<br>(1.47% - 2.01%) | 0.26%<br>(0.18% - 0.36%) | 0.09%<br>(0.05% - 0.14%) | 0.06%<br>(0.03% - 0.09%) | 0.05%<br>(0.02% - 0.09%) |
| Cook Islands                                  | 5.96%<br>(5.52% - 6.43%)    | 4.14%<br>(3.82% - 4.47%)    | 3.83%<br>(3.54% - 4.15%)    | 3.54%<br>(3.27% - 3.85%)    | 0.91%<br>(0.76% - 1.08%)   | 0.46%<br>(0.37% - 0.56%)  | 0.44%<br>(0.36% - 0.53%)  | 0.42%<br>(0.34% - 0.51%) | 0.00%<br>(0.00% - 0.00%) | 0.00%<br>(0.00% - 0.00%) | 0.00%<br>(0.00% - 0.00%) | 0.00%<br>(0.00% - 0.00%) |
| Guam                                          | 4.88%<br>(4.52% - 5.26%)    | 3.59%<br>(3.31% - 3.88%)    | 3.55%<br>(3.28% - 3.84%)    | 3.47%<br>(3.19% - 3.75%)    | 0.70%<br>(0.58% - 0.82%)   | 0.38%<br>(0.31% - 0.47%)  | 0.39%<br>(0.32% - 0.47%)  | 0.39%<br>(0.31% - 0.47%) | 0.00%<br>(0.00% - 0.00%) | 0.00%<br>(0.00% - 0.00%) | 0.00%<br>(0.00% - 0.00%) | 0.00%<br>(0.00% - 0.00%) |
| Nauru                                         | 5.41%<br>(5.04% - 5.80%)    | 5.78%<br>(5.32% - 6.21%)    | 5.28%<br>(4.90% - 5.65%)    | 4.01%<br>(3.70% - 4.33%)    | 0.48%<br>(0.39% - 0.59%)   | 0.43%<br>(0.33% - 0.54%)  | 0.41%<br>(0.32% - 0.50%)  | 0.31%<br>(0.25% - 0.38%) | 0.00%<br>(0.00% - 0.00%) | 0.00%<br>(0.00% - 0.00%) | 0.00%<br>(0.00% - 0.00%) | 0.00%<br>(0.00% - 0.00%) |
| Niue                                          | 6.78%<br>(6.28% - 7.28%)    | 5.12%<br>(4.75% - 5.55%)    | 4.82%<br>(4.44% - 5.22%)    | 4.58%<br>(4.23% - 4.94%)    | 1.03%<br>(0.86% - 1.23%)   | 0.60%<br>(0.48% - 0.73%)  | 0.59%<br>(0.48% - 0.71%)  | 0.58%<br>(0.46% - 0.69%) | 0.00%<br>(0.00% - 0.01%) | 0.00%<br>(0.00% - 0.00%) | 0.00%<br>(0.00% - 0.00%) | 0.00%<br>(0.00% - 0.00%) |
| Northern Mariana Islands                      | 4.91%<br>(4.54% - 5.28%)    | 3.69%<br>(3.44% - 3.97%)    | 3.82%<br>(3.54% - 4.13%)    | 3.72%<br>(3.44% - 4.01%)    | 0.71%<br>(0.60% - 0.83%)   | 0.41%<br>(0.34% - 0.49%)  | 0.44%<br>(0.36% - 0.53%)  | 0.44%<br>(0.36% - 0.52%) | 0.00%<br>(0.00% - 0.00%) | 0.00%<br>(0.00% - 0.00%) | 0.00%<br>(0.00% - 0.00%) | 0.00%<br>(0.00% - 0.00%) |
| Palau                                         | 6.30%<br>(5.83% - 6.74%)    | 4.70%<br>(4.34% - 5.08%)    | 5.03%<br>(4.68% - 5.40%)    | 4.55%<br>(4.22% - 4.89%)    | 0.96%<br>(0.81% - 1.12%)   | 0.54%<br>(0.44% - 0.66%)  | 0.64%<br>(0.54% - 0.77%)  | 0.58%<br>(0.47% - 0.69%) | 0.00%<br>(0.00% - 0.01%) | 0.00%<br>(0.00% - 0.00%) | 0.00%<br>(0.00% - 0.00%) | 0.00%<br>(0.00% - 0.00%) |
| Tokelau                                       | 9.35%<br>(8.68% - 10.04%)   | 6.73%<br>(6.26% - 7.25%)    | 5.83%<br>(5.38% - 6.31%)    | 5.06%<br>(4.64% - 5.49%)    | 1.53%<br>(1.25% - 1.83%)   | 0.83%<br>(0.68% - 1.00%)  | 0.74%<br>(0.61% - 0.90%)  | 0.65%<br>(0.53% - 0.79%) | 0.02%<br>(0.00% - 0.05%) | 0.00%<br>(0.00% - 0.00%) | 0.00%<br>(0.00% - 0.00%) | 0.00%<br>(0.00% - 0.00%) |

**Table S8c. Estimated overall, severe, and extreme underweight prevalence (%) in children under 5 years, both sexes, in 1990, 2000, 2010, and 2020.**

| Location                       | Total                       |                             |                             |                             | Severe                      |                             |                             |                           | Extreme                  |                          |                          |                          |
|--------------------------------|-----------------------------|-----------------------------|-----------------------------|-----------------------------|-----------------------------|-----------------------------|-----------------------------|---------------------------|--------------------------|--------------------------|--------------------------|--------------------------|
|                                | 1990                        | 2000                        | 2010                        | 2020                        | 1990                        | 2000                        | 2010                        | 2020                      | 1990                     | 2000                     | 2010                     | 2020                     |
| Tuvalu                         | 2.60%<br>(2.41% - 2.80%)    | 1.87%<br>(1.73% - 2.02%)    | 1.65%<br>(1.51% - 1.80%)    | 1.53%<br>(1.41% - 1.66%)    | 0.00%<br>(0.00% - 0.01%)    | 0.00%<br>(0.00% - 0.00%)    | 0.00%<br>(0.00% - 0.00%)    | 0.00%<br>(0.00% - 0.00%)  | 0.00%<br>(0.00% - 0.00%) | 0.00%<br>(0.00% - 0.00%) | 0.00%<br>(0.00% - 0.00%) | 0.00%<br>(0.00% - 0.00%) |
| <b>Southeast Asia</b>          | 26.69%<br>(26.49% - 26.89%) | 22.57%<br>(22.42% - 22.73%) | 18.49%<br>(18.35% - 18.64%) | 15.80%<br>(15.58% - 16.02%) | 9.40%<br>(9.19% - 9.62%)    | 7.69%<br>(7.54% - 7.85%)    | 5.58%<br>(5.45% - 5.71%)    | 4.48%<br>(4.32% - 4.65%)  | 1.86%<br>(1.76% - 1.96%) | 1.48%<br>(1.41% - 1.56%) | 0.88%<br>(0.83% - 0.93%) | 0.64%<br>(0.59% - 0.70%) |
| Cambodia                       | 35.95%<br>(34.74% - 37.30%) | 33.47%<br>(32.57% - 34.53%) | 25.60%<br>(24.94% - 26.36%) | 21.07%<br>(20.25% - 21.87%) | 13.90%<br>(12.75% - 15.14%) | 13.37%<br>(12.28% - 14.47%) | 8.25%<br>(7.57% - 9.02%)    | 6.20%<br>(5.37% - 7.06%)  | 2.74%<br>(2.01% - 3.67%) | 2.92%<br>(2.15% - 3.75%) | 1.29%<br>(0.97% - 1.68%) | 0.86%<br>(0.57% - 1.21%) |
| Indonesia                      | 26.48%<br>(26.27% - 26.67%) | 22.36%<br>(22.20% - 22.50%) | 19.15%<br>(18.98% - 19.32%) | 16.75%<br>(16.52% - 16.96%) | 9.60%<br>(9.36% - 9.83%)    | 7.93%<br>(7.78% - 8.08%)    | 6.11%<br>(5.97% - 6.26%)    | 5.05%<br>(4.89% - 5.21%)  | 2.07%<br>(1.95% - 2.18%) | 1.69%<br>(1.63% - 1.76%) | 1.09%<br>(1.04% - 1.14%) | 0.81%<br>(0.75% - 0.86%) |
| <i>Aceh</i>                    | 33.29%<br>(32.55% - 34.05%) | 30.22%<br>(29.50% - 30.92%) | 25.76%<br>(24.88% - 26.59%) | 23.19%<br>(22.32% - 24.05%) | 17.37%<br>(16.15% - 18.66%) | 15.75%<br>(14.69% - 16.85%) | 11.38%<br>(10.40% - 12.44%) | 9.57%<br>(8.60% - 10.58%) | 6.44%<br>(5.33% - 7.70%) | 5.91%<br>(5.03% - 6.91%) | 3.29%<br>(2.66% - 4.03%) | 2.50%<br>(1.96% - 3.12%) |
| <i>North Sumatra</i>           | 29.68%<br>(29.06% - 30.34%) | 26.27%<br>(25.75% - 26.79%) | 21.96%<br>(21.34% - 22.55%) | 18.57%<br>(17.74% - 19.33%) | 12.18%<br>(11.33% - 13.06%) | 10.93%<br>(10.25% - 11.60%) | 7.70%<br>(7.11% - 8.34%)    | 5.76%<br>(5.14% - 6.43%)  | 2.97%<br>(2.47% - 3.52%) | 2.83%<br>(2.46% - 3.24%) | 1.55%<br>(1.30% - 1.84%) | 0.95%<br>(0.74% - 1.21%) |
| <i>West Sumatra</i>            | 24.96%<br>(24.34% - 25.58%) | 21.60%<br>(21.09% - 22.14%) | 18.73%<br>(18.06% - 19.37%) | 16.06%<br>(15.18% - 16.91%) | 7.95%<br>(7.23% - 8.63%)    | 6.71%<br>(6.20% - 7.22%)    | 4.91%<br>(4.41% - 5.45%)    | 3.94%<br>(3.33% - 4.55%)  | 1.33%<br>(1.06% - 1.64%) | 1.08%<br>(0.91% - 1.27%) | 0.57%<br>(0.43% - 0.73%) | 0.39%<br>(0.26% - 0.57%) |
| <i>Riau</i>                    | 28.17%<br>(27.43% - 28.87%) | 22.56%<br>(21.91% - 23.19%) | 18.77%<br>(18.08% - 19.49%) | 16.38%<br>(15.60% - 17.21%) | 12.24%<br>(11.28% - 13.20%) | 8.82%<br>(8.18% - 9.46%)    | 6.33%<br>(5.76% - 6.92%)    | 5.13%<br>(4.56% - 5.73%)  | 3.38%<br>(2.75% - 4.05%) | 2.15%<br>(1.82% - 2.49%) | 1.23%<br>(1.01% - 1.47%) | 0.88%<br>(0.68% - 1.11%) |
| <i>Jambi</i>                   | 24.25%<br>(23.51% - 24.96%) | 22.24%<br>(21.73% - 22.79%) | 19.31%<br>(18.66% - 19.94%) | 16.33%<br>(15.50% - 17.13%) | 7.98%<br>(7.22% - 8.75%)    | 7.98%<br>(7.47% - 8.56%)    | 6.34%<br>(5.81% - 6.89%)    | 4.98%<br>(4.35% - 5.58%)  | 1.39%<br>(1.09% - 1.73%) | 1.65%<br>(1.43% - 1.92%) | 1.14%<br>(0.93% - 1.36%) | 0.79%<br>(0.58% - 1.02%) |
| <i>South Sumatra</i>           | 27.84%<br>(27.06% - 28.58%) | 23.41%<br>(22.85% - 24.04%) | 19.81%<br>(19.17% - 20.47%) | 16.57%<br>(15.73% - 17.43%) | 11.18%<br>(10.17% - 12.23%) | 9.02%<br>(8.37% - 9.74%)    | 6.81%<br>(6.26% - 7.43%)    | 5.11%<br>(4.48% - 5.76%)  | 2.87%<br>(2.25% - 3.56%) | 2.12%<br>(1.80% - 2.52%) | 1.33%<br>(1.10% - 1.61%) | 0.82%<br>(0.61% - 1.07%) |
| <i>Bengkulu</i>                | 21.67%<br>(20.94% - 22.38%) | 17.42%<br>(16.81% - 18.10%) | 15.09%<br>(14.42% - 15.81%) | 12.69%<br>(12.01% - 13.39%) | 7.06%<br>(6.38% - 7.78%)    | 5.36%<br>(4.85% - 5.88%)    | 4.11%<br>(3.63% - 4.63%)    | 3.26%<br>(2.83% - 3.70%)  | 1.24%<br>(0.98% - 1.54%) | 0.88%<br>(0.71% - 1.07%) | 0.54%<br>(0.40% - 0.70%) | 0.37%<br>(0.26% - 0.49%) |
| <i>Lampung</i>                 | 24.30%<br>(23.65% - 24.96%) | 20.76%<br>(20.23% - 21.27%) | 16.59%<br>(15.98% - 17.22%) | 13.98%<br>(13.20% - 14.82%) | 7.98%<br>(7.32% - 8.67%)    | 6.96%<br>(6.46% - 7.46%)    | 4.56%<br>(4.11% - 5.02%)    | 3.51%<br>(3.06% - 4.04%)  | 1.43%<br>(1.18% - 1.73%) | 1.35%<br>(1.16% - 1.56%) | 0.61%<br>(0.49% - 0.76%) | 0.38%<br>(0.26% - 0.52%) |
| <i>Bangka-Belitung Islands</i> | 22.52%<br>(21.62% - 23.43%) | 20.36%<br>(19.67% - 21.04%) | 16.39%<br>(15.76% - 17.01%) | 13.59%<br>(12.81% - 14.37%) | 7.02%<br>(6.14% - 7.94%)    | 4.46%<br>(5.81% - 7.10%)    | 3.54%<br>(4.01% - 4.91%)    | 3.54%<br>(3.09% - 4.03%)  | 1.14%<br>(0.83% - 1.52%) | 1.09%<br>(0.86% - 1.34%) | 0.58%<br>(0.44% - 0.73%) | 0.42%<br>(0.29% - 0.58%) |
| <i>Riau Islands</i>            | 20.64%<br>(19.64% - 21.60%) | 17.16%<br>(16.26% - 18.02%) | 15.65%<br>(14.92% - 16.39%) | 13.76%<br>(12.97% - 14.51%) | 6.13%<br>(5.25% - 6.99%)    | 4.91%<br>(4.27% - 5.61%)    | 4.29%<br>(3.77% - 4.84%)    | 3.58%<br>(3.09% - 4.07%)  | 0.90%<br>(0.62% - 1.22%) | 0.69%<br>(0.48% - 0.93%) | 0.55%<br>(0.39% - 0.73%) | 0.40%<br>(0.28% - 0.55%) |
| <i>North Kalimantan</i>        | 27.38%<br>(26.50% - 28.30%) | 24.77%<br>(24.02% - 25.51%) | 23.15%<br>(22.58% - 23.70%) | 20.67%<br>(19.88% - 21.48%) | 9.03%<br>(7.99% - 10.08%)   | 8.40%<br>(7.59% - 9.28%)    | 7.96%<br>(7.41% - 8.53%)    | 6.95%<br>(6.20% - 7.69%)  | 1.55%<br>(1.14% - 2.03%) | 1.54%<br>(1.20% - 1.93%) | 1.51%<br>(1.27% - 1.76%) | 1.30%<br>(1.01% - 1.64%) |
| <i>Jakarta</i>                 | 23.09%<br>(22.52% - 23.66%) | 17.84%<br>(17.43% - 18.27%) | 14.66%<br>(14.08% - 15.27%) | 13.17%<br>(12.43% - 13.86%) | 8.41%<br>(7.83% - 9.03%)    | 5.91%<br>(5.57% - 6.29%)    | 4.18%<br>(3.79% - 4.62%)    | 3.62%<br>(3.16% - 4.08%)  | 1.81%<br>(1.54% - 2.11%) | 1.12%<br>(0.99% - 1.28%) | 0.59%<br>(0.47% - 0.74%) | 0.48%<br>(0.33% - 0.63%) |
| <i>West Java</i>               | 26.47%<br>(25.86% - 27.12%) | 20.79%<br>(20.25% - 21.33%) | 16.80%<br>(16.15% - 17.43%) | 15.23%<br>(14.44% - 16.02%) | 9.78%<br>(9.01% - 10.55%)   | 7.11%<br>(6.61% - 7.63%)    | 4.77%<br>(4.31% - 5.25%)    | 4.19%<br>(3.65% - 4.78%)  | 2.05%<br>(1.68% - 2.44%) | 1.35%<br>(1.16% - 1.58%) | 0.64%<br>(0.50% - 0.80%) | 0.53%<br>(0.37% - 0.73%) |
| <i>Central Java</i>            | 24.93%<br>(24.26% - 25.56%) | 20.35%<br>(19.93% - 20.79%) | 17.03%<br>(16.48% - 17.57%) | 14.56%<br>(13.81% - 15.32%) | 7.76%<br>(7.04% - 8.44%)    | 6.04%<br>(5.64% - 6.44%)    | 4.59%<br>(4.19% - 5.01%)    | 3.72%<br>(3.24% - 4.20%)  | 1.25%<br>(1.00% - 1.52%) | 0.92%<br>(0.78% - 1.06%) | 0.58%<br>(0.46% - 0.71%) | 0.41%<br>(0.28% - 0.55%) |
| <i>Yogyakarta</i>              | 18.24%<br>(17.56% - 18.92%) | 15.15%<br>(14.65% - 15.64%) | 12.32%<br>(11.73% - 12.95%) | 11.04%<br>(10.36% - 11.74%) | 4.45%<br>(3.95% - 5.02%)    | 3.66%<br>(3.31% - 4.02%)    | 2.56%<br>(2.24% - 2.91%)    | 2.29%<br>(1.95% - 2.64%)  | 0.45%<br>(0.32% - 0.60%) | 0.35%<br>(0.27% - 0.45%) | 0.15%<br>(0.09% - 0.23%) | 0.13%<br>(0.06% - 0.21%) |
| <i>East Java</i>               | 26.51%<br>(25.87% - 27.05%) | 21.66%<br>(21.16% - 22.15%) | 17.86%<br>(17.23% - 18.45%) | 15.87%<br>(15.08% - 16.58%) | 9.45%<br>(8.69% - 10.24%)   | 7.19%<br>(6.71% - 7.69%)    | 5.29%<br>(4.80% - 5.79%)    | 4.54%<br>(3.98% - 5.11%)  | 1.90%<br>(1.57% - 2.28%) | 1.32%<br>(1.13% - 1.52%) | 0.79%<br>(0.62% - 0.96%) | 0.63%<br>(0.45% - 0.83%) |
| <i>Banten</i>                  | 23.40%<br>(22.55% - 24.35%) | 20.67%<br>(20.00% - 21.33%) | 18.85%<br>(18.19% - 19.44%) | 16.12%<br>(15.29% - 16.89%) | 7.39%<br>(6.46% - 8.33%)    | 6.62%<br>(6.01% - 7.30%)    | 5.82%<br>(5.27% - 6.36%)    | 4.67%<br>(4.03% - 5.23%)  | 1.20%<br>(0.88% - 1.59%) | 1.13%<br>(0.91% - 1.39%) | 0.93%<br>(0.73% - 1.15%) | 0.67%<br>(0.46% - 0.87%) |
| <i>Bali</i>                    | 19.03%<br>(18.38% - 19.67%) | 14.74%<br>(14.23% - 15.25%) | 12.74%<br>(12.13% - 13.33%) | 10.73%<br>(10.02% - 11.41%) | 5.20%<br>(4.64% - 5.76%)    | 3.79%<br>(3.47% - 4.10%)    | 2.96%<br>(2.64% - 3.30%)    | 2.31%<br>(1.97% - 2.64%)  | 0.69%<br>(0.53% - 0.86%) | 0.44%<br>(0.35% - 0.52%) | 0.26%<br>(0.18% - 0.34%) | 0.14%<br>(0.08% - 0.22%) |
| <i>West Nusa Tenggara</i>      | 35.32%<br>(33.77% - 37.03%) | 30.24%<br>(29.27% - 31.41%) | 25.46%<br>(24.80% - 26.15%) | 22.70%<br>(21.91% - 23.52%) | 11.23%<br>(10.06% - 12.50%) | 9.57%<br>(8.57% - 10.60%)   | 8.50%<br>(7.66% - 9.35%)    | 7.48%<br>(6.68% - 8.33%)  | 1.72%<br>(1.33% - 2.19%) | 1.64%<br>(1.28% - 2.04%) | 1.57%<br>(1.25% - 1.94%) | 1.36%<br>(1.05% - 1.75%) |

Table S8c. Estimated overall, severe, and extreme underweight prevalence (%) in children under 5 years, both sexes, in 1990, 2000, 2010, and 2020.

| Location                         | Total             |                   |                   |                   | Severe            |                   |                   |                  | Extreme         |                 |                 |                 |
|----------------------------------|-------------------|-------------------|-------------------|-------------------|-------------------|-------------------|-------------------|------------------|-----------------|-----------------|-----------------|-----------------|
|                                  | 1990              | 2000              | 2010              | 2020              | 1990              | 2000              | 2010              | 2020             | 1990            | 2000            | 2010            | 2020            |
| East Nusa Tenggara               | 31.73%            | 29.99%            | 28.50%            | 25.36%            | 11.11%            | 10.99%            | 10.39%            | 9.16%            | 2.05%           | 2.22%           | 2.09%           | 1.86%           |
|                                  | (30.79% - 32.77%) | (29.14% - 30.91%) | (27.80% - 29.25%) | (24.57% - 26.15%) | (9.97% - 12.25%)  | (9.99% - 12.04%)  | (9.47% - 11.29%)  | (8.27% - 10.15%) | (1.53% - 2.66%) | (1.70% - 2.78%) | (1.66% - 2.58%) | (1.44% - 2.40%) |
| West Kalimantan                  | 33.69%            | 28.66%            | 25.11%            | 21.22%            | 17.72%            | 13.68%            | 10.64%            | 8.19%            | 6.60%           | 4.42%           | 2.86%           | 1.92%           |
|                                  | (33.06% - 34.33%) | (28.11% - 29.27%) | (24.39% - 25.79%) | (20.37% - 22.02%) | (16.59% - 19.07%) | (12.86% - 14.61%) | (9.82% - 11.49%)  | (7.39% - 9.03%)  | (5.55% - 7.98%) | (3.79% - 5.13%) | (2.35% - 3.39%) | (1.52% - 2.38%) |
| Central Kalimantan               | 28.33%            | 26.92%            | 23.95%            | 20.48%            | 11.23%            | 12.28%            | 9.42%             | 7.42%            | 2.61%           | 3.72%           | 2.26%           | 1.58%           |
|                                  | (27.67% - 29.03%) | (26.37% - 27.45%) | (23.35% - 24.56%) | (19.63% - 21.33%) | (10.34% - 12.18%) | (11.59% - 13.02%) | (8.74% - 10.12%)  | (6.68% - 8.24%)  | (2.12% - 3.21%) | (3.25% - 4.25%) | (1.90% - 2.66%) | (1.24% - 1.99%) |
| South Kalimantan                 | 29.94%            | 25.72%            | 24.31%            | 20.43%            | 11.94%            | 9.68%             | 8.86%             | 6.59%            | 2.85%           | 2.13%           | 1.85%           | 1.14%           |
|                                  | (29.32% - 30.63%) | (25.18% - 26.23%) | (23.54% - 25.09%) | (19.49% - 21.29%) | (11.03% - 12.91%) | (9.03% - 10.30%)  | (8.02% - 9.71%)   | (5.78% - 7.47%)  | (2.33% - 3.43%) | (1.81% - 2.47%) | (1.45% - 2.29%) | (0.82% - 1.52%) |
| East Kalimantan                  | 22.93%            | 20.39%            | 16.98%            | 14.65%            | 6.74%             | 6.53%             | 4.92%             | 4.08%            | 0.95%           | 1.11%           | 0.70%           | 0.54%           |
|                                  | (22.47% - 23.39%) | (20.02% - 20.77%) | (16.63% - 17.37%) | (13.94% - 15.33%) | (6.21% - 7.23%)   | (6.16% - 6.88%)   | (4.62% - 5.22%)   | (3.60% - 4.58%)  | (0.77% - 1.14%) | (0.96% - 1.26%) | (0.60% - 0.81%) | (0.40% - 0.71%) |
| North Sulawesi                   | 22.54%            | 20.71%            | 16.48%            | 13.74%            | 7.77%             | 7.83%             | 4.77%             | 3.62%            | 1.47%           | 1.75%           | 0.66%           | 0.41%           |
|                                  | (21.84% - 23.27%) | (20.13% - 21.33%) | (15.85% - 17.13%) | (13.00% - 14.52%) | (7.11% - 8.48%)   | (7.21% - 8.43%)   | (4.30% - 5.25%)   | (3.13% - 4.13%)  | (1.18% - 1.81%) | (1.46% - 2.06%) | (0.52% - 0.83%) | (0.28% - 0.57%) |
| Central Sulawesi                 | 25.98%            | 23.99%            | 22.99%            | 18.95%            | 8.73%             | 8.71%             | 8.16%             | 6.13%            | 1.57%           | 1.82%           | 1.65%           | 1.08%           |
|                                  | (25.27% - 26.66%) | (23.44% - 24.53%) | (22.38% - 23.63%) | (18.14% - 19.79%) | (7.89% - 9.60%)   | (8.13% - 9.26%)   | (7.50% - 8.83%)   | (5.43% - 6.87%)  | (1.22% - 1.96%) | (1.54% - 2.09%) | (1.37% - 1.95%) | (0.84% - 1.39%) |
| South Sulawesi                   | 27.89%            | 24.26%            | 22.22%            | 19.17%            | 9.27%             | 8.42%             | 7.40%             | 5.92%            | 1.70%           | 1.72%           | 1.37%           | 0.95%           |
|                                  | (27.10% - 28.73%) | (23.66% - 24.87%) | (21.50% - 22.98%) | (18.28% - 20.02%) | (8.41% - 10.11%)  | (7.80% - 9.07%)   | (6.71% - 8.14%)   | (5.17% - 6.64%)  | (1.37% - 2.05%) | (1.47% - 2.01%) | (1.10% - 1.67%) | (0.69% - 1.22%) |
| Southeast Sulawesi               | 24.28%            | 22.33%            | 21.33%            | 17.90%            | 7.97%             | 7.72%             | 7.43%             | 5.76%            | 1.38%           | 1.49%           | 1.47%           | 1.01%           |
|                                  | (23.57% - 24.93%) | (21.73% - 22.88%) | (20.70% - 21.98%) | (17.08% - 18.71%) | (7.27% - 8.71%)   | (7.14% - 8.32%)   | (6.85% - 8.07%)   | (5.13% - 6.44%)  | (1.10% - 1.71%) | (1.26% - 1.77%) | (1.21% - 1.75%) | (0.79% - 1.28%) |
| Gorontalo                        | 34.43%            | 33.63%            | 30.04%            | 24.78%            | 18.63%            | 18.74%            | 15.17%            | 10.88%           | 7.24%           | 7.71%           | 5.36%           | 3.10%           |
|                                  | (33.65% - 35.19%) | (32.98% - 34.28%) | (29.28% - 30.78%) | (23.89% - 25.70%) | (17.35% - 20.08%) | (17.56% - 19.96%) | (14.14% - 16.30%) | (9.85% - 11.97%) | (6.06% - 8.67%) | (6.59% - 8.96%) | (4.50% - 6.37%) | (2.47% - 3.85%) |
| West Sulawesi                    | 26.90%            | 24.81%            | 22.86%            | 19.39%            | 8.62%             | 8.17%             | 7.45%             | 6.06%            | 1.41%           | 1.43%           | 1.30%           | 1.00%           |
|                                  | (25.96% - 27.83%) | (23.99% - 25.69%) | (22.11% - 23.62%) | (18.55% - 20.24%) | (7.54% - 9.64%)   | (7.30% - 9.03%)   | (6.69% - 8.24%)   | (5.33% - 6.83%)  | (1.04% - 1.86%) | (1.10% - 1.81%) | (1.01% - 1.62%) | (0.75% - 1.30%) |
| Maluku                           | 28.84%            | 25.59%            | 26.34%            | 22.95%            | 13.42%            | 11.35%            | 11.30%            | 9.12%            | 4.12%           | 3.26%           | 3.08%           | 2.23%           |
|                                  | (28.10% - 29.58%) | (24.92% - 26.25%) | (25.63% - 27.01%) | (22.06% - 23.77%) | (12.39% - 14.46%) | (10.57% - 12.16%) | (10.45% - 12.17%) | (8.16% - 10.00%) | (3.38% - 4.95%) | (2.78% - 3.81%) | (2.53% - 3.66%) | (1.76% - 2.73%) |
| North Maluku                     | 23.16%            | 21.08%            | 21.97%            | 19.46%            | 7.96%             | 7.30%             | 7.77%             | 6.52%            | 1.54%           | 1.45%           | 1.58%           | 1.23%           |
|                                  | (22.33% - 24.03%) | (20.41% - 21.73%) | (21.42% - 22.56%) | (18.64% - 20.26%) | (7.11% - 8.93%)   | (6.68% - 7.98%)   | (7.21% - 8.37%)   | (5.82% - 7.24%)  | (1.19% - 1.96%) | (1.19% - 1.74%) | (1.32% - 1.87%) | (0.96% - 1.55%) |
| West Papua                       | 25.17%            | 22.76%            | 20.48%            | 17.12%            | 8.40%             | 7.79%             | 6.50%             | 5.06%            | 1.49%           | 1.48%           | 1.10%           | 0.76%           |
|                                  | (24.24% - 26.06%) | (21.87% - 23.63%) | (19.57% - 21.40%) | (16.26% - 17.97%) | (7.43% - 9.41%)   | (6.93% - 8.75%)   | (5.68% - 7.38%)   | (4.44% - 5.74%)  | (1.13% - 1.94%) | (1.12% - 1.91%) | (0.79% - 1.43%) | (0.54% - 1.00%) |
| Papua                            | 27.98%            | 25.72%            | 23.86%            | 20.66%            | 12.54%            | 11.76%            | 9.67%             | 7.70%            | 3.65%           | 3.59%           | 2.44%           | 1.72%           |
|                                  | (27.26% - 28.67%) | (25.10% - 26.37%) | (23.20% - 24.54%) | (19.84% - 21.47%) | (11.55% - 13.44%) | (11.04% - 12.57%) | (8.96% - 10.37%)  | (6.94% - 8.47%)  | (2.99% - 4.31%) | (3.11% - 4.15%) | (2.03% - 2.84%) | (1.35% - 2.11%) |
| Lao People's Democratic Republic | 32.95%            | 31.34%            | 25.76%            | 20.56%            | 14.32%            | 13.20%            | 8.60%             | 6.08%            | 3.80%           | 3.34%           | 1.47%           | 0.86%           |
|                                  | (32.19% - 33.77%) | (30.60% - 32.09%) | (24.99% - 26.53%) | (19.65% - 21.39%) | (13.23% - 15.54%) | (12.16% - 14.24%) | (7.68% - 9.51%)   | (5.21% - 6.95%)  | (3.05% - 4.72%) | (2.65% - 4.12%) | (1.05% - 1.95%) | (0.56% - 1.21%) |
| Malaysia                         | 21.27%            | 16.18%            | 13.62%            | 12.43%            | 7.16%             | 4.66%             | 3.46%             | 3.07%            | 1.31%           | 0.65%           | 0.37%           | 0.30%           |
|                                  | (20.88% - 21.67%) | (15.74% - 16.63%) | (13.14% - 14.11%) | (11.89% - 12.97%) | (6.79% - 7.54%)   | (4.33% - 4.99%)   | (3.17% - 3.76%)   | (2.77% - 3.39%)  | (1.16% - 1.48%) | (0.54% - 0.77%) | (0.28% - 0.46%) | (0.22% - 0.39%) |
| Maldives                         | 35.06%            | 27.46%            | 17.73%            | 15.45%            | 14.32%            | 10.62%            | 5.10%             | 3.99%            | 3.29%           | 2.41%           | 0.72%           | 0.45%           |
|                                  | (34.17% - 36.08%) | (26.70% - 28.19%) | (16.95% - 18.57%) | (14.67% - 16.28%) | (13.11% - 15.67%) | (9.61% - 11.61%)  | (4.45% - 5.82%)   | (3.45% - 4.63%)  | (2.41% - 4.44%) | (1.81% - 3.07%) | (0.50% - 0.99%) | (0.29% - 0.66%) |
| Myanmar                          | 31.12%            | 27.55%            | 21.28%            | 16.58%            | 10.07%            | 8.76%             | 5.73%             | 3.89%            | 1.53%           | 1.32%           | 0.65%           | 0.33%           |
|                                  | (30.20% - 32.12%) | (26.82% - 28.29%) | (20.54% - 22.10%) | (15.70% - 17.46%) | (9.05% - 11.09%)  | (7.90% - 9.75%)   | (4.88% - 6.56%)   | (3.21% - 4.62%)  | (1.13% - 2.01%) | (0.98% - 1.79%) | (0.40% - 0.94%) | (0.16% - 0.53%) |
| Philippines                      | 25.01%            | 22.74%            | 18.89%            | 16.27%            | 9.02%             | 7.84%             | 5.68%             | 4.76%            | 1.90%           | 1.53%           | 0.88%           | 0.72%           |
|                                  | (24.66% - 25.35%) | (22.36% - 23.13%) | (18.52% - 19.25%) | (15.61% - 16.93%) | (8.58% - 9.41%)   | (7.45% - 8.26%)   | (5.34% - 6.03%)   | (4.26% - 5.27%)  | (1.69% - 2.11%) | (1.34% - 1.75%) | (0.72% - 1.03%) | (0.54% - 0.92%) |
| Mountain Province                | 20.20%            | 17.12%            | 12.51%            | 10.40%            | 4.65%             | 3.61%             | 2.16%             | 1.80%            | 0.44%           | 0.25%           | 0.05%           | 0.04%           |
|                                  | (19.15% - 21.18%) | (16.21% - 18.06%) | (11.94% - 13.10%) | (9.53% - 11.26%)  | (3.87% - 5.45%)   | (2.96% - 4.29%)   | (1.82% - 2.51%)   | (1.39% - 2.25%)  | (0.28% - 0.65%) | (0.13% - 0.40%) | (0.01% - 0.12%) | (0.00% - 0.13%) |
| Ifugao                           | 20.20%            | 16.47%            | 12.38%            | 10.29%            | 4.62%             | 3.50%             | 2.12%             | 1.78%            | 0.43%           | 0.25%           | 0.05%           | 0.04%           |
|                                  | (19.13% - 21.18%) | (15.56% - 17.47%) | (11.81% - 12.98%) | (9.43% - 11.13%)  | (3.82% - 5.46%)   | (2.87% - 4.17%)   | (1.77% - 2.51%)   | (1.37% - 2.22%)  | (0.28% - 0.64%) | (0.14% - 0.40%) | (0.01% - 0.12%) | (0.00% - 0.13%) |
| Benguet                          | 19.12%            | 16.13%            | 12.42%            | 10.69%            | 4.56%             | 3.46%             | 2.18%             | 1.89%            | 0.46%           | 0.25%           | 0.06%           | 0.05%           |
|                                  | (18.08% - 20.13%) | (15.15% - 17.08%) | (11.82% - 13.06%) | (9.84% - 11.59%)  | (3.77% - 5.30%)   | (2.85% - 4.12%)   | (1.82% - 2.56%)   | (1.46% - 2.32%)  | (0.29% - 0.66%) | (0.14% - 0.40%) | (0.01% - 0.13%) | (0.00% - 0.13%) |

**Table S8c. Estimated overall, severe, and extreme underweight prevalence (%) in children under 5 years, both sexes, in 1990, 2000, 2010, and 2020.**

| Location      | Total             |                   |                   |                   | Severe            |                  |                 |                 | Extreme         |                 |                 |                 |
|---------------|-------------------|-------------------|-------------------|-------------------|-------------------|------------------|-----------------|-----------------|-----------------|-----------------|-----------------|-----------------|
|               | 1990              | 2000              | 2010              | 2020              | 1990              | 2000             | 2010            | 2020            | 1990            | 2000            | 2010            | 2020            |
| Abra          | 18.68%            | 16.44%            | 12.44%            | 10.60%            | 4.43%             | 3.57%            | 2.15%           | 1.85%           | 0.44%           | 0.27%           | 0.05%           | 0.05%           |
|               | (17.65% - 19.63%) | (15.48% - 17.40%) | (11.84% - 13.05%) | (9.78% - 11.47%)  | (3.71% - 5.18%)   | (2.95% - 4.25%)  | (1.77% - 2.53%) | (1.47% - 2.30%) | (0.29% - 0.63%) | (0.14% - 0.43%) | (0.01% - 0.12%) | (0.00% - 0.13%) |
| Apayao        | 20.64%            | 17.54%            | 12.51%            | 10.28%            | 4.68%             | 3.59%            | 2.12%           | 1.78%           | 0.43%           | 0.23%           | 0.05%           | 0.04%           |
|               | (19.61% - 21.64%) | (16.51% - 18.51%) | (11.91% - 13.15%) | (9.44% - 11.19%)  | (3.83% - 5.56%)   | (2.92% - 4.27%)  | (1.75% - 2.46%) | (1.39% - 2.27%) | (0.27% - 0.64%) | (0.13% - 0.38%) | (0.00% - 0.11%) | (0.00% - 0.13%) |
| Kalinga       | 20.45%            | 16.79%            | 12.43%            | 10.64%            | 4.49%             | 3.46%            | 2.11%           | 1.87%           | 0.39%           | 0.23%           | 0.05%           | 0.05%           |
|               | (19.41% - 21.46%) | (15.82% - 17.83%) | (11.82% - 13.04%) | (9.74% - 11.54%)  | (3.68% - 5.32%)   | (2.81% - 4.13%)  | (1.72% - 2.50%) | (1.44% - 2.36%) | (0.25% - 0.58%) | (0.12% - 0.37%) | (0.01% - 0.12%) | (0.00% - 0.14%) |
| La Union      | 24.33%            | 22.09%            | 18.48%            | 16.06%            | 9.21%             | 7.87%            | 5.67%           | 4.78%           | 2.12%           | 1.64%           | 0.91%           | 0.75%           |
|               | (23.33% - 25.25%) | (21.18% - 22.92%) | (17.91% - 19.10%) | (15.06% - 16.99%) | (8.24% - 10.31%)  | (6.99% - 8.80%)  | (5.12% - 6.23%) | (4.00% - 5.58%) | (1.65% - 2.71%) | (1.23% - 2.12%) | (0.67% - 1.17%) | (0.47% - 1.07%) |
| Ilocos Norte  | 22.99%            | 21.32%            | 18.14%            | 16.89%            | 8.34%             | 7.33%            | 5.50%           | 5.16%           | 1.79%           | 1.43%           | 0.86%           | 0.84%           |
|               | (22.02% - 23.86%) | (20.40% - 22.17%) | (17.54% - 18.75%) | (15.84% - 17.89%) | (7.37% - 9.38%)   | (6.44% - 8.23%)  | (4.96% - 6.05%) | (4.33% - 5.99%) | (1.36% - 2.31%) | (1.07% - 1.85%) | (0.64% - 1.10%) | (0.54% - 1.19%) |
| Ilocos Sur    | 24.30%            | 21.67%            | 18.39%            | 15.76%            | 9.00%             | 7.59%            | 5.59%           | 4.63%           | 1.98%           | 1.53%           | 0.88%           | 0.70%           |
|               | (23.33% - 25.23%) | (20.71% - 22.55%) | (17.72% - 19.00%) | (14.68% - 16.69%) | (8.02% - 10.02%)  | (6.71% - 8.46%)  | (5.04% - 6.15%) | (3.90% - 5.41%) | (1.55% - 2.51%) | (1.16% - 1.94%) | (0.66% - 1.12%) | (0.45% - 1.01%) |
| Pangasinan    | 24.66%            | 22.67%            | 18.50%            | 15.56%            | 9.29%             | 8.11%            | 5.66%           | 4.50%           | 2.11%           | 1.68%           | 0.90%           | 0.66%           |
|               | (23.76% - 25.59%) | (21.78% - 23.61%) | (17.90% - 19.14%) | (14.55% - 16.52%) | (8.23% - 10.37%)  | (7.21% - 9.07%)  | (5.12% - 6.24%) | (3.76% - 5.23%) | (1.60% - 2.69%) | (1.27% - 2.13%) | (0.67% - 1.16%) | (0.42% - 0.94%) |
| Nueva Vizcaya | 26.67%            | 24.63%            | 21.03%            | 18.79%            | 10.67%            | 9.35%            | 7.13%           | 6.23%           | 2.64%           | 2.12%           | 1.35%           | 1.17%           |
|               | (25.69% - 27.65%) | (23.77% - 25.56%) | (20.43% - 21.67%) | (17.69% - 19.76%) | (9.47% - 11.83%)  | (8.41% - 10.37%) | (6.51% - 7.74%) | (5.31% - 7.22%) | (2.04% - 3.29%) | (1.66% - 2.68%) | (1.04% - 1.67%) | (0.79% - 1.63%) |
| Cagayan       | 28.02%            | 25.59%            | 21.37%            | 18.19%            | 11.28%            | 9.98%            | 7.33%           | 5.92%           | 2.80%           | 2.35%           | 1.41%           | 1.08%           |
|               | (27.10% - 29.01%) | (24.74% - 26.50%) | (20.74% - 22.00%) | (17.14% - 19.14%) | (10.08% - 12.59%) | (8.98% - 11.07%) | (6.67% - 7.94%) | (5.01% - 6.77%) | (2.16% - 3.54%) | (1.83% - 2.97%) | (1.10% - 1.75%) | (0.72% - 1.48%) |
| Isabela       | 27.98%            | 25.73%            | 21.38%            | 18.47%            | 11.40%            | 10.15%           | 7.35%           | 6.04%           | 2.89%           | 2.44%           | 1.42%           | 1.11%           |
|               | (27.07% - 28.89%) | (24.85% - 26.62%) | (20.74% - 22.02%) | (17.41% - 19.48%) | (10.21% - 12.62%) | (9.09% - 11.23%) | (6.74% - 7.96%) | (5.13% - 6.99%) | (2.22% - 3.66%) | (1.87% - 3.05%) | (1.11% - 1.74%) | (0.73% - 1.52%) |
| Quirino       | 29.30%            | 26.10%            | 21.48%            | 18.18%            | 11.87%            | 10.21%           | 7.33%           | 5.95%           | 2.96%           | 2.41%           | 1.40%           | 1.09%           |
|               | (28.39% - 30.20%) | (25.16% - 26.96%) | (20.89% - 22.11%) | (17.20% - 19.26%) | (10.66% - 13.20%) | (9.16% - 11.30%) | (6.71% - 7.98%) | (5.08% - 6.86%) | (2.28% - 3.80%) | (1.87% - 3.03%) | (1.08% - 1.76%) | (0.73% - 1.49%) |
| Batanes       | 28.57%            | 26.15%            | 21.36%            | 19.58%            | 12.03%            | 10.41%           | 7.43%           | 6.66%           | 3.22%           | 2.54%           | 1.47%           | 1.30%           |
|               | (27.65% - 29.47%) | (25.26% - 27.00%) | (20.75% - 22.00%) | (18.54% - 20.65%) | (10.80% - 13.25%) | (9.41% - 11.48%) | (6.78% - 8.09%) | (5.72% - 7.62%) | (2.55% - 4.00%) | (2.03% - 3.18%) | (1.16% - 1.83%) | (0.90% - 1.75%) |
| Bataan        | 20.79%            | 18.24%            | 14.93%            | 13.10%            | 7.04%             | 5.73%            | 4.00%           | 3.48%           | 1.37%           | 0.98%           | 0.50%           | 0.43%           |
|               | (19.86% - 21.73%) | (17.43% - 19.08%) | (14.38% - 15.53%) | (12.19% - 14.03%) | (6.21% - 7.92%)   | (5.06% - 6.42%)  | (3.55% - 4.42%) | (2.91% - 4.17%) | (1.04% - 1.76%) | (0.73% - 1.27%) | (0.34% - 0.65%) | (0.26% - 0.66%) |
| Zambales      | 19.86%            | 18.00%            | 15.01%            | 12.75%            | 6.67%             | 5.63%            | 4.04%           | 3.35%           | 1.29%           | 0.95%           | 0.51%           | 0.40%           |
|               | (18.90% - 20.72%) | (17.07% - 18.87%) | (14.44% - 15.63%) | (11.83% - 13.67%) | (5.85% - 7.46%)   | (4.93% - 6.38%)  | (3.62% - 4.49%) | (2.78% - 3.97%) | (0.99% - 1.63%) | (0.70% - 1.26%) | (0.36% - 0.67%) | (0.23% - 0.61%) |
| Tarlac        | 21.06%            | 18.47%            | 14.95%            | 13.24%            | 7.24%             | 5.90%            | 4.05%           | 3.55%           | 1.44%           | 1.04%           | 0.51%           | 0.45%           |
|               | (20.09% - 21.95%) | (17.64% - 19.36%) | (14.38% - 15.50%) | (12.34% - 14.14%) | (6.41% - 8.12%)   | (5.21% - 6.69%)  | (3.62% - 4.51%) | (2.96% - 4.14%) | (1.13% - 1.85%) | (0.80% - 1.37%) | (0.37% - 0.68%) | (0.27% - 0.65%) |
| Pampanga      | 20.80%            | 18.35%            | 14.79%            | 13.70%            | 7.09%             | 5.81%            | 4.00%           | 3.72%           | 1.40%           | 1.00%           | 0.50%           | 0.49%           |
|               | (19.91% - 21.80%) | (17.48% - 19.20%) | (14.25% - 15.37%) | (12.79% - 14.60%) | (6.22% - 8.01%)   | (5.10% - 6.54%)  | (3.57% - 4.40%) | (3.10% - 4.36%) | (1.05% - 1.80%) | (0.74% - 1.30%) | (0.36% - 0.66%) | (0.30% - 0.70%) |
| Bulacan       | 20.60%            | 17.89%            | 14.97%            | 12.66%            | 7.01%             | 5.58%            | 4.06%           | 3.30%           | 1.38%           | 0.94%           | 0.52%           | 0.39%           |
|               | (19.69% - 21.52%) | (17.04% - 18.74%) | (14.41% - 15.54%) | (11.79% - 13.57%) | (6.16% - 7.88%)   | (4.93% - 6.26%)  | (3.62% - 4.48%) | (2.76% - 3.92%) | (1.04% - 1.73%) | (0.71% - 1.21%) | (0.37% - 0.68%) | (0.23% - 0.60%) |
| Nueva Ecija   | 20.53%            | 18.54%            | 15.07%            | 12.42%            | 6.99%             | 5.93%            | 4.09%           | 3.20%           | 1.37%           | 1.04%           | 0.52%           | 0.37%           |
|               | (19.64% - 21.43%) | (17.71% - 19.39%) | (14.53% - 15.63%) | (11.59% - 13.24%) | (6.14% - 7.86%)   | (5.21% - 6.71%)  | (3.65% - 4.53%) | (2.67% - 3.77%) | (1.04% - 1.76%) | (0.77% - 1.36%) | (0.37% - 0.68%) | (0.21% - 0.56%) |
| Aurora        | 20.99%            | 18.84%            | 15.02%            | 12.61%            | 6.92%             | 5.81%            | 3.99%           | 3.26%           | 1.28%           | 0.95%           | 0.48%           | 0.38%           |
|               | (20.04% - 21.88%) | (17.92% - 19.68%) | (14.45% - 15.58%) | (11.70% - 13.50%) | (6.08% - 7.76%)   | (5.08% - 6.60%)  | (3.54% - 4.41%) | (2.69% - 3.81%) | (0.96% - 1.64%) | (0.70% - 1.26%) | (0.33% - 0.64%) | (0.21% - 0.56%) |
| Rizal         | 19.80%            | 17.77%            | 14.76%            | 12.45%            | 6.44%             | 5.30%            | 3.78%           | 3.05%           | 1.18%           | 0.82%           | 0.42%           | 0.30%           |
|               | (18.88% - 20.71%) | (16.88% - 18.65%) | (14.18% - 15.35%) | (11.54% - 13.42%) | (5.65% - 7.25%)   | (4.65% - 6.05%)  | (3.35% - 4.23%) | (2.49% - 3.62%) | (0.88% - 1.52%) | (0.60% - 1.09%) | (0.28% - 0.57%) | (0.15% - 0.48%) |
| Cavite        | 19.18%            | 17.84%            | 14.70%            | 12.21%            | 6.09%             | 5.33%            | 3.76%           | 2.98%           | 1.07%           | 0.82%           | 0.41%           | 0.29%           |
|               | (18.26% - 20.11%) | (16.94% - 18.73%) | (14.15% - 15.23%) | (11.27% - 13.07%) | (5.31% - 6.93%)   | (4.62% - 6.10%)  | (3.33% - 4.18%) | (2.45% - 3.50%) | (0.80% - 1.39%) | (0.59% - 1.12%) | (0.27% - 0.57%) | (0.15% - 0.45%) |
| Laguna        | 19.69%            | 18.21%            | 14.63%            | 12.15%            | 6.29%             | 5.52%            | 3.72%           | 2.95%           | 1.11%           | 0.88%           | 0.40%           | 0.29%           |
|               | (18.77% - 20.56%) | (17.30% - 19.12%) | (14.08% - 15.21%) | (11.28% - 13.10%) | (5.50% - 7.04%)   | (4.82% - 6.27%)  | (3.28% - 4.16%) | (2.43% - 3.55%) | (0.82% - 1.42%) | (0.64% - 1.16%) | (0.27% - 0.55%) | (0.15% - 0.47%) |
| Batangas      | 20.94%            | 19.10%            | 14.58%            | 12.36%            | 6.92%             | 5.89%            | 3.70%           | 3.04%           | 1.29%           | 0.96%           | 0.40%           | 0.30%           |
|               | (19.97% - 21.85%) | (18.23% - 20.02%) | (13.98% - 15.14%) | (11.48% - 13.23%) | (6.05% - 7.81%)   | (5.20% - 6.71%)  | (3.31% - 4.13%) | (2.52% - 3.62%) | (0.96% - 1.66%) | (0.71% - 1.27%) | (0.28% - 0.55%) | (0.16% - 0.49%) |



**Table S8c. Estimated overall, severe, and extreme underweight prevalence (%) in children under 5 years, both sexes, in 1990, 2000, 2010, and 2020.**

| Location                  | Total                       |                             |                             |                             | Severe                      |                            |                          |                          | Extreme                  |                          |                          |                          |
|---------------------------|-----------------------------|-----------------------------|-----------------------------|-----------------------------|-----------------------------|----------------------------|--------------------------|--------------------------|--------------------------|--------------------------|--------------------------|--------------------------|
|                           | 1990                        | 2000                        | 2010                        | 2020                        | 1990                        | 2000                       | 2010                     | 2020                     | 1990                     | 2000                     | 2010                     | 2020                     |
| <i>Quezon</i>             | 20.42%<br>(19.45% - 21.30%) | 18.19%<br>(17.31% - 19.07%) | 14.72%<br>(14.13% - 15.33%) | 12.38%<br>(11.49% - 13.28%) | 6.50%<br>(5.66% - 7.36%)    | 5.36%<br>(4.65% - 6.11%)   | 3.72%<br>(3.28% - 4.13%) | 3.04%<br>(2.50% - 3.60%) | 1.14%<br>(0.84% - 1.48%) | 0.81%<br>(0.57% - 1.08%) | 0.39%<br>(0.27% - 0.54%) | 0.30%<br>(0.16% - 0.48%) |
| <i>Occidental Mindoro</i> | 27.65%<br>(26.74% - 28.54%) | 25.53%<br>(24.71% - 26.35%) | 22.24%<br>(21.63% - 22.91%) | 19.79%<br>(18.65% - 20.78%) | 10.57%<br>(9.36% - 11.75%)  | 9.45%<br>(8.47% - 10.61%)  | 7.37%<br>(6.70% - 8.06%) | 6.51%<br>(5.50% - 7.47%) | 2.40%<br>(1.82% - 3.07%) | 2.03%<br>(1.54% - 2.65%) | 1.32%<br>(1.00% - 1.69%) | 1.19%<br>(0.79% - 1.63%) |
| <i>Oriental Mindoro</i>   | 28.74%<br>(27.79% - 29.67%) | 26.52%<br>(25.65% - 27.35%) | 22.39%<br>(21.78% - 23.06%) | 18.96%<br>(17.93% - 19.99%) | 11.07%<br>(9.80% - 12.39%)  | 9.96%<br>(8.85% - 11.19%)  | 7.51%<br>(6.82% - 8.20%) | 6.11%<br>(5.18% - 6.98%) | 2.53%<br>(1.89% - 3.30%) | 2.18%<br>(1.62% - 2.89%) | 1.37%<br>(1.03% - 1.74%) | 1.08%<br>(0.71% - 1.49%) |
| <i>Ramblan</i>            | 29.24%<br>(28.34% - 30.10%) | 26.98%<br>(26.10% - 27.86%) | 22.45%<br>(21.81% - 23.15%) | 19.05%<br>(17.99% - 20.07%) | 11.37%<br>(10.17% - 12.63%) | 10.15%<br>(8.99% - 11.26%) | 7.46%<br>(6.77% - 8.20%) | 6.15%<br>(5.22% - 7.11%) | 2.63%<br>(2.00% - 3.40%) | 2.21%<br>(1.66% - 2.83%) | 1.34%<br>(1.00% - 1.71%) | 1.10%<br>(0.73% - 1.52%) |
| <i>Palawan</i>            | 28.37%<br>(27.55% - 29.30%) | 26.15%<br>(25.27% - 27.04%) | 22.42%<br>(21.83% - 23.02%) | 18.38%<br>(17.40% - 19.34%) | 10.95%<br>(9.82% - 12.21%)  | 9.83%<br>(8.83% - 10.90%)  | 7.45%<br>(6.80% - 8.06%) | 5.84%<br>(4.96% - 6.76%) | 2.52%<br>(1.91% - 3.27%) | 2.16%<br>(1.64% - 2.77%) | 1.33%<br>(1.02% - 1.68%) | 1.01%<br>(0.67% - 1.40%) |
| <i>Marinduque</i>         | 28.86%<br>(27.96% - 29.78%) | 26.33%<br>(25.48% - 27.27%) | 22.40%<br>(21.76% - 23.07%) | 19.41%<br>(18.45% - 20.40%) | 10.96%<br>(9.72% - 12.29%)  | 9.82%<br>(8.72% - 10.96%)  | 7.44%<br>(6.76% - 8.08%) | 6.24%<br>(5.38% - 7.19%) | 2.44%<br>(1.83% - 3.20%) | 2.12%<br>(1.58% - 2.74%) | 1.33%<br>(1.00% - 1.68%) | 1.10%<br>(0.72% - 1.52%) |
| <i>Catanduanes</i>        | 28.42%<br>(27.53% - 29.33%) | 25.97%<br>(25.13% - 26.83%) | 22.21%<br>(21.59% - 22.81%) | 19.87%<br>(18.83% - 20.81%) | 10.87%<br>(9.71% - 12.08%)  | 9.67%<br>(8.70% - 10.71%)  | 7.45%<br>(6.82% - 8.09%) | 6.57%<br>(5.61% - 7.52%) | 2.46%<br>(1.86% - 3.18%) | 2.09%<br>(1.58% - 2.68%) | 1.36%<br>(1.05% - 1.72%) | 1.21%<br>(0.81% - 1.69%) |
| <i>Comarines Norte</i>    | 27.65%<br>(26.75% - 28.51%) | 25.43%<br>(24.60% - 26.33%) | 22.40%<br>(21.76% - 23.05%) | 18.83%<br>(17.82% - 19.83%) | 10.81%<br>(9.66% - 12.10%)  | 9.59%<br>(8.46% - 10.79%)  | 7.53%<br>(6.85% - 8.26%) | 6.05%<br>(5.15% - 6.96%) | 2.55%<br>(1.98% - 3.27%) | 2.13%<br>(1.58% - 2.77%) | 1.39%<br>(1.05% - 1.77%) | 1.07%<br>(0.71% - 1.47%) |
| <i>Sorsogon</i>           | 29.00%<br>(28.10% - 29.91%) | 26.47%<br>(25.61% - 27.33%) | 22.41%<br>(21.80% - 23.06%) | 19.37%<br>(18.33% - 20.41%) | 11.33%<br>(10.12% - 12.59%) | 9.98%<br>(8.89% - 11.09%)  | 7.57%<br>(6.90% - 8.23%) | 6.37%<br>(5.37% - 7.29%) | 2.64%<br>(1.99% - 3.42%) | 2.19%<br>(1.66% - 2.83%) | 1.40%<br>(1.06% - 1.76%) | 1.17%<br>(0.77% - 1.59%) |
| <i>Albay</i>              | 28.60%<br>(27.68% - 29.50%) | 26.61%<br>(25.75% - 27.51%) | 22.42%<br>(21.81% - 23.03%) | 18.79%<br>(17.84% - 19.83%) | 11.27%<br>(9.97% - 12.61%)  | 10.22%<br>(9.09% - 11.41%) | 7.66%<br>(6.99% - 8.30%) | 6.05%<br>(5.18% - 7.00%) | 2.68%<br>(2.02% - 3.48%) | 2.32%<br>(1.76% - 2.99%) | 1.45%<br>(1.12% - 1.81%) | 1.08%<br>(0.74% - 1.49%) |
| <i>Masbate</i>            | 28.03%<br>(27.16% - 28.87%) | 26.57%<br>(25.70% - 27.44%) | 22.44%<br>(21.83% - 23.05%) | 19.04%<br>(18.05% - 20.04%) | 10.99%<br>(9.79% - 12.16%)  | 10.06%<br>(9.02% - 11.23%) | 7.53%<br>(6.85% - 8.21%) | 6.14%<br>(5.25% - 7.10%) | 2.60%<br>(2.01% - 3.28%) | 2.23%<br>(1.71% - 2.92%) | 1.38%<br>(1.05% - 1.74%) | 1.09%<br>(0.74% - 1.51%) |
| <i>Comarines Sur</i>      | 28.16%<br>(27.32% - 29.09%) | 26.11%<br>(25.27% - 26.95%) | 22.37%<br>(21.75% - 23.02%) | 19.01%<br>(17.99% - 19.98%) | 11.13%<br>(10.09% - 12.22%) | 10.05%<br>(9.02% - 11.17%) | 7.59%<br>(6.93% - 8.25%) | 6.17%<br>(5.28% - 7.07%) | 2.66%<br>(2.08% - 3.35%) | 2.30%<br>(1.75% - 2.96%) | 1.42%<br>(1.09% - 1.78%) | 1.11%<br>(0.73% - 1.54%) |
| <i>Capiz</i>              | 28.13%<br>(27.21% - 29.02%) | 25.99%<br>(25.14% - 26.87%) | 21.56%<br>(20.97% - 22.17%) | 18.13%<br>(17.11% - 19.11%) | 10.75%<br>(9.55% - 12.01%)  | 9.55%<br>(8.53% - 10.67%)  | 7.55%<br>(6.35% - 7.62%) | 5.63%<br>(4.81% - 6.57%) | 2.43%<br>(1.85% - 3.10%) | 2.01%<br>(1.52% - 2.66%) | 1.21%<br>(0.92% - 1.53%) | 0.94%<br>(0.63% - 1.35%) |
| <i>Aklan</i>              | 27.95%<br>(27.08% - 28.87%) | 25.95%<br>(25.08% - 26.83%) | 21.50%<br>(20.88% - 22.08%) | 19.06%<br>(18.02% - 20.15%) | 10.67%<br>(9.54% - 11.90%)  | 9.52%<br>(8.48% - 10.59%)  | 6.99%<br>(6.38% - 7.64%) | 5.99%<br>(5.06% - 6.95%) | 2.41%<br>(1.85% - 3.12%) | 2.00%<br>(1.50% - 2.59%) | 1.22%<br>(0.93% - 1.54%) | 1.01%<br>(0.65% - 1.45%) |
| <i>Antique</i>            | 27.88%<br>(26.94% - 28.77%) | 25.57%<br>(24.70% - 26.50%) | 21.61%<br>(21.00% - 22.21%) | 18.22%<br>(17.28% - 19.24%) | 10.64%<br>(9.47% - 11.86%)  | 9.37%<br>(8.33% - 10.51%)  | 6.95%<br>(6.32% - 7.63%) | 5.67%<br>(4.91% - 6.57%) | 2.40%<br>(1.81% - 3.13%) | 1.97%<br>(1.47% - 2.60%) | 1.18%<br>(0.89% - 1.54%) | 0.95%<br>(0.65% - 1.34%) |
| <i>Negros Occidental</i>  | 27.15%<br>(26.26% - 28.05%) | 25.16%<br>(24.30% - 26.04%) | 21.37%<br>(20.78% - 22.00%) | 19.32%<br>(18.29% - 20.30%) | 10.22%<br>(9.06% - 11.32%)  | 9.10%<br>(8.12% - 10.22%)  | 6.88%<br>(6.26% - 7.51%) | 6.14%<br>(5.24% - 7.10%) | 2.26%<br>(1.72% - 2.89%) | 1.88%<br>(1.42% - 2.48%) | 1.18%<br>(0.89% - 1.49%) | 1.06%<br>(0.69% - 1.50%) |
| <i>Iloilo</i>             | 26.77%<br>(25.89% - 27.64%) | 25.31%<br>(24.40% - 26.22%) | 21.52%<br>(20.93% - 22.18%) | 18.75%<br>(17.72% - 19.72%) | 10.39%<br>(9.23% - 11.56%)  | 9.50%<br>(8.49% - 10.62%)  | 7.02%<br>(6.35% - 7.67%) | 5.90%<br>(5.03% - 6.77%) | 2.43%<br>(1.86% - 3.11%) | 2.09%<br>(1.61% - 2.72%) | 1.23%<br>(0.91% - 1.55%) | 1.00%<br>(0.67% - 1.38%) |
| <i>Guimaras</i>           | 29.91%<br>(28.97% - 30.88%) | 27.30%<br>(26.42% - 28.13%) | 21.61%<br>(20.99% - 22.22%) | 18.83%<br>(17.83% - 19.87%) | 11.28%<br>(10.11% - 12.54%) | 10.03%<br>(8.96% - 11.21%) | 7.04%<br>(6.43% - 7.75%) | 5.97%<br>(5.09% - 6.89%) | 2.47%<br>(1.85% - 3.18%) | 2.09%<br>(1.56% - 2.75%) | 1.23%<br>(0.92% - 1.58%) | 1.03%<br>(0.69% - 1.44%) |
| <i>Negros Oriental</i>    | 26.25%<br>(25.32% - 27.20%) | 23.92%<br>(22.99% - 24.79%) | 20.09%<br>(19.46% - 20.78%) | 17.07%<br>(16.10% - 18.09%) | 8.91%<br>(7.85% - 10.05%)   | 7.83%<br>(6.87% - 8.78%)   | 4.71%<br>(5.06% - 6.31%) | 4.71%<br>(3.90% - 5.49%) | 1.66%<br>(1.22% - 2.18%) | 1.36%<br>(0.98% - 1.78%) | 0.76%<br>(0.53% - 1.03%) | 0.62%<br>(0.36% - 0.91%) |
| <i>Cebu</i>               | 26.80%<br>(25.84% - 27.70%) | 24.78%<br>(23.85% - 25.68%) | 20.00%<br>(19.45% - 20.60%) | 17.29%<br>(16.26% - 18.28%) | 9.34%<br>(8.17% - 10.47%)   | 8.24%<br>(7.26% - 9.15%)   | 5.71%<br>(5.11% - 6.32%) | 4.80%<br>(4.00% - 5.58%) | 1.81%<br>(1.32% - 2.37%) | 1.46%<br>(1.06% - 1.89%) | 0.78%<br>(0.54% - 1.03%) | 0.64%<br>(0.40% - 0.93%) |
| <i>Bahol</i>              | 27.66%<br>(26.74% - 28.54%) | 24.97%<br>(24.04% - 25.86%) | 20.12%<br>(19.47% - 20.76%) | 17.49%<br>(16.56% - 18.52%) | 9.61%<br>(8.57% - 10.67%)   | 8.49%<br>(7.48% - 9.48%)   | 5.76%<br>(5.14% - 6.37%) | 4.94%<br>(4.15% - 5.75%) | 1.85%<br>(1.41% - 2.40%) | 1.57%<br>(1.15% - 2.06%) | 0.79%<br>(0.55% - 1.04%) | 0.68%<br>(0.41% - 1.01%) |
| <i>Siquijor</i>           | 28.18%<br>(27.23% - 29.27%) | 24.75%<br>(23.87% - 25.62%) | 19.97%<br>(19.33% - 20.60%) | 17.72%<br>(16.71% - 18.76%) | 9.14%<br>(8.01% - 10.36%)   | 7.88%<br>(6.91% - 8.92%)   | 5.64%<br>(5.01% - 6.21%) | 5.01%<br>(4.19% - 5.92%) | 1.56%<br>(1.13% - 2.11%) | 1.30%<br>(0.93% - 1.74%) | 0.75%<br>(0.51% - 0.99%) | 0.69%<br>(0.42% - 1.04%) |
| <i>Southern Leyte</i>     | 29.44%<br>(28.59% - 30.41%) | 26.96%<br>(26.09% - 27.82%) | 22.96%<br>(22.31% - 23.63%) | 20.41%<br>(19.38% - 21.42%) | 10.77%<br>(9.57% - 12.05%)  | 9.66%<br>(8.59% - 10.88%)  | 7.38%<br>(6.67% - 8.10%) | 6.51%<br>(5.54% - 7.49%) | 2.24%<br>(1.66% - 2.94%) | 1.93%<br>(1.43% - 2.59%) | 1.23%<br>(0.90% - 1.61%) | 1.12%<br>(0.75% - 1.57%) |

**Table S8c. Estimated overall, severe, and extreme underweight prevalence (%) in children under 5 years, both sexes, in 1990, 2000, 2010, and 2020.**

| Location                         | Total                       |                             |                             |                             | Severe                      |                            |                          |                          | Extreme                  |                          |                          |                          |
|----------------------------------|-----------------------------|-----------------------------|-----------------------------|-----------------------------|-----------------------------|----------------------------|--------------------------|--------------------------|--------------------------|--------------------------|--------------------------|--------------------------|
|                                  | 1990                        | 2000                        | 2010                        | 2020                        | 1990                        | 2000                       | 2010                     | 2020                     | 1990                     | 2000                     | 2010                     | 2020                     |
| <i>Eastern Samar</i>             | 30.48%<br>(29.51% - 31.48%) | 28.01%<br>(27.07% - 28.87%) | 23.08%<br>(22.46% - 23.71%) | 19.43%<br>(18.39% - 20.46%) | 10.95%<br>(9.85% - 12.27%)  | 10.02%<br>(8.84% - 11.33%) | 7.34%<br>(6.61% - 8.02%) | 5.98%<br>(5.10% - 6.93%) | 2.19%<br>(1.66% - 2.90%) | 1.98%<br>(1.43% - 2.70%) | 1.20%<br>(0.87% - 1.55%) | 0.97%<br>(0.63% - 1.40%) |
| <i>Northern Samar</i>            | 29.23%<br>(28.30% - 30.23%) | 27.32%<br>(26.43% - 28.28%) | 19.14%<br>(22.57% - 23.87%) | 19.14%<br>(18.09% - 20.24%) | 10.62%<br>(9.39% - 11.81%)  | 9.80%<br>(8.70% - 10.94%)  | 7.41%<br>(6.68% - 8.13%) | 5.91%<br>(5.01% - 6.84%) | 2.18%<br>(1.63% - 2.81%) | 1.96%<br>(1.46% - 2.58%) | 1.22%<br>(0.89% - 1.59%) | 0.97%<br>(0.62% - 1.36%) |
| <i>Samar (Western Samar)</i>     | 29.50%<br>(28.59% - 30.49%) | 27.36%<br>(26.50% - 28.27%) | 23.03%<br>(22.37% - 23.64%) | 19.43%<br>(18.42% - 20.43%) | 10.62%<br>(9.46% - 11.89%)  | 9.78%<br>(8.65% - 10.93%)  | 7.34%<br>(6.64% - 8.04%) | 6.02%<br>(5.11% - 6.96%) | 2.15%<br>(1.60% - 2.84%) | 1.94%<br>(1.43% - 2.56%) | 1.20%<br>(0.89% - 1.57%) | 0.99%<br>(0.62% - 1.40%) |
| <i>Leyte</i>                     | 30.55%<br>(29.63% - 31.51%) | 28.28%<br>(27.42% - 29.16%) | 23.37%<br>(22.67% - 24.08%) | 19.19%<br>(18.18% - 20.21%) | 11.19%<br>(10.07% - 12.38%) | 10.35%<br>(9.23% - 11.51%) | 7.57%<br>(6.84% - 8.30%) | 5.96%<br>(5.06% - 6.84%) | 2.31%<br>(1.76% - 2.96%) | 2.12%<br>(1.59% - 2.81%) | 1.28%<br>(0.94% - 1.65%) | 0.98%<br>(0.65% - 1.39%) |
| <i>Biliran</i>                   | 30.38%<br>(29.44% - 31.43%) | 27.51%<br>(26.66% - 28.40%) | 22.91%<br>(22.28% - 23.53%) | 20.83%<br>(19.72% - 21.85%) | 11.00%<br>(9.72% - 12.22%)  | 9.81%<br>(8.60% - 10.92%)  | 7.43%<br>(6.69% - 8.18%) | 6.70%<br>(5.63% - 7.75%) | 2.23%<br>(1.66% - 2.90%) | 1.93%<br>(1.39% - 2.53%) | 1.27%<br>(0.91% - 1.67%) | 1.17%<br>(0.75% - 1.66%) |
| <i>Zamboanga Sibugay</i>         | 27.85%<br>(26.97% - 28.76%) | 26.53%<br>(25.67% - 27.37%) | 22.21%<br>(21.63% - 22.82%) | 18.36%<br>(17.32% - 19.39%) | 10.76%<br>(9.58% - 12.03%)  | 9.97%<br>(8.87% - 11.20%)  | 7.41%<br>(6.76% - 8.07%) | 5.85%<br>(4.98% - 6.77%) | 2.48%<br>(1.89% - 3.18%) | 2.18%<br>(1.64% - 2.91%) | 1.35%<br>(1.03% - 1.71%) | 1.03%<br>(0.69% - 1.43%) |
| <i>Zamboanga Del Norte</i>       | 27.98%<br>(27.15% - 28.86%) | 26.06%<br>(25.19% - 26.91%) | 22.05%<br>(21.43% - 22.65%) | 19.22%<br>(18.24% - 20.25%) | 10.77%<br>(9.63% - 11.88%)  | 9.87%<br>(8.82% - 10.97%)  | 7.40%<br>(6.77% - 8.10%) | 6.28%<br>(5.41% - 7.31%) | 2.46%<br>(1.89% - 3.13%) | 2.20%<br>(1.65% - 2.82%) | 1.36%<br>(1.04% - 1.74%) | 1.15%<br>(0.79% - 1.60%) |
| <i>Zamboanga Del Sur</i>         | 28.04%<br>(27.19% - 28.89%) | 25.95%<br>(25.04% - 26.90%) | 22.17%<br>(21.60% - 22.83%) | 18.96%<br>(17.93% - 19.97%) | 10.80%<br>(9.69% - 12.03%)  | 9.83%<br>(8.75% - 11.00%)  | 7.46%<br>(6.81% - 8.18%) | 6.18%<br>(5.32% - 7.10%) | 2.47%<br>(1.90% - 3.21%) | 2.19%<br>(1.66% - 2.88%) | 1.37%<br>(1.05% - 1.74%) | 1.12%<br>(0.77% - 1.53%) |
| <i>Misamis Occidental</i>        | 25.99%<br>(25.05% - 26.87%) | 23.72%<br>(22.85% - 24.66%) | 20.26%<br>(19.63% - 20.90%) | 17.19%<br>(16.19% - 18.25%) | 9.19%<br>(8.14% - 10.27%)   | 8.00%<br>(7.06% - 8.93%)   | 5.95%<br>(5.32% - 6.54%) | 4.86%<br>(4.06% - 5.71%) | 1.84%<br>(1.38% - 2.35%) | 1.47%<br>(1.08% - 1.90%) | 0.85%<br>(0.61% - 1.11%) | 0.67%<br>(0.40% - 1.00%) |
| <i>Bukidnon</i>                  | 27.10%<br>(26.19% - 28.02%) | 24.76%<br>(23.85% - 25.69%) | 20.45%<br>(19.80% - 21.08%) | 16.39%<br>(15.37% - 17.39%) | 9.43%<br>(8.32% - 10.56%)   | 8.33%<br>(7.28% - 9.37%)   | 6.02%<br>(5.40% - 6.67%) | 4.55%<br>(3.78% - 5.40%) | 1.83%<br>(1.36% - 2.38%) | 1.52%<br>(1.10% - 2.02%) | 0.87%<br>(0.62% - 1.15%) | 0.61%<br>(0.37% - 0.91%) |
| <i>Lanao Del Norte</i>           | 25.81%<br>(24.83% - 26.69%) | 23.86%<br>(22.97% - 24.80%) | 20.16%<br>(19.56% - 20.80%) | 17.55%<br>(16.55% - 18.56%) | 9.09%<br>(7.93% - 10.30%)   | 8.08%<br>(7.09% - 9.04%)   | 5.90%<br>(5.25% - 6.53%) | 5.11%<br>(4.31% - 5.99%) | 1.82%<br>(1.35% - 2.42%) | 1.50%<br>(1.09% - 1.95%) | 0.84%<br>(0.59% - 1.12%) | 0.75%<br>(0.46% - 1.12%) |
| <i>Misamis Oriental</i>          | 26.80%<br>(25.84% - 27.69%) | 24.78%<br>(23.87% - 25.69%) | 20.11%<br>(19.51% - 20.72%) | 17.85%<br>(16.80% - 18.92%) | 9.76%<br>(8.58% - 10.94%)   | 8.63%<br>(7.61% - 9.73%)   | 5.93%<br>(5.35% - 6.55%) | 5.19%<br>(4.34% - 6.03%) | 2.05%<br>(1.52% - 2.68%) | 1.67%<br>(1.26% - 2.24%) | 0.86%<br>(0.63% - 1.14%) | 0.76%<br>(0.47% - 1.09%) |
| <i>Camiguin</i>                  | 27.95%<br>(26.97% - 28.89%) | 25.19%<br>(24.28% - 26.06%) | 20.34%<br>(19.75% - 20.96%) | 17.63%<br>(16.60% - 18.71%) | 9.78%<br>(8.68% - 10.94%)   | 8.50%<br>(7.48% - 9.50%)   | 6.01%<br>(5.41% - 6.63%) | 5.22%<br>(4.35% - 6.15%) | 1.91%<br>(1.44% - 2.46%) | 1.55%<br>(1.12% - 2.02%) | 0.87%<br>(0.62% - 1.15%) | 0.80%<br>(0.49% - 1.15%) |
| <i>Davao Oriental</i>            | 26.04%<br>(25.09% - 26.93%) | 23.32%<br>(22.41% - 24.17%) | 19.14%<br>(18.52% - 19.74%) | 16.10%<br>(15.09% - 17.10%) | 8.88%<br>(7.85% - 10.02%)   | 7.54%<br>(6.55% - 8.46%)   | 5.29%<br>(4.67% - 5.87%) | 4.36%<br>(3.60% - 5.15%) | 1.67%<br>(1.24% - 2.18%) | 1.29%<br>(0.90% - 1.68%) | 0.68%<br>(0.45% - 0.92%) | 0.56%<br>(0.32% - 0.86%) |
| <i>Davao de Oro</i>              | 26.25%<br>(25.32% - 27.14%) | 23.78%<br>(22.89% - 24.72%) | 19.06%<br>(18.49% - 19.66%) | 15.98%<br>(14.93% - 16.98%) | 8.88%<br>(7.76% - 9.98%)    | 7.67%<br>(6.73% - 8.63%)   | 5.31%<br>(4.74% - 5.89%) | 4.33%<br>(3.64% - 5.08%) | 1.65%<br>(1.22% - 2.15%) | 1.30%<br>(0.94% - 1.72%) | 0.69%<br>(0.48% - 0.92%) | 0.55%<br>(0.33% - 0.82%) |
| <i>Davao Del Sur</i>             | 26.17%<br>(25.24% - 27.12%) | 23.59%<br>(22.69% - 24.49%) | 19.00%<br>(18.39% - 19.58%) | 16.11%<br>(15.17% - 17.14%) | 8.90%<br>(7.78% - 9.99%)    | 7.69%<br>(6.80% - 8.64%)   | 5.29%<br>(4.74% - 5.90%) | 4.42%<br>(3.74% - 5.20%) | 1.67%<br>(1.22% - 2.20%) | 1.33%<br>(0.98% - 1.74%) | 0.69%<br>(0.48% - 0.92%) | 0.58%<br>(0.36% - 0.87%) |
| <i>Davao Occidental</i>          | 24.95%<br>(24.00% - 25.84%) | 23.07%<br>(22.13% - 24.03%) | 18.91%<br>(18.28% - 19.52%) | 15.91%<br>(14.97% - 16.81%) | 8.20%<br>(7.16% - 9.27%)    | 7.24%<br>(6.31% - 8.20%)   | 5.17%<br>(4.63% - 5.72%) | 4.28%<br>(3.60% - 5.02%) | 1.46%<br>(1.07% - 1.93%) | 1.17%<br>(0.83% - 1.57%) | 0.65%<br>(0.45% - 0.86%) | 0.54%<br>(0.32% - 0.81%) |
| <i>Davao Del Norte</i>           | 26.85%<br>(25.89% - 27.79%) | 24.16%<br>(23.25% - 25.13%) | 19.13%<br>(18.51% - 19.75%) | 16.71%<br>(15.71% - 17.65%) | 9.25%<br>(8.08% - 10.36%)   | 8.07%<br>(7.02% - 9.08%)   | 5.36%<br>(4.72% - 5.95%) | 4.65%<br>(3.86% - 5.43%) | 1.77%<br>(1.29% - 2.32%) | 1.46%<br>(1.03% - 1.94%) | 0.70%<br>(0.48% - 0.94%) | 0.63%<br>(0.38% - 0.92%) |
| <i>South Cotabato</i>            | 28.25%<br>(27.33% - 29.19%) | 26.01%<br>(25.12% - 26.86%) | 22.45%<br>(21.83% - 23.13%) | 19.11%<br>(18.09% - 20.09%) | 10.42%<br>(9.29% - 11.62%)  | 9.28%<br>(8.16% - 10.44%)  | 7.07%<br>(6.35% - 7.74%) | 5.86%<br>(4.91% - 6.75%) | 2.21%<br>(1.68% - 2.89%) | 1.86%<br>(1.35% - 2.51%) | 1.14%<br>(0.83% - 1.47%) | 0.94%<br>(0.59% - 1.32%) |
| <i>Sultan Kudarat</i>            | 28.25%<br>(27.29% - 29.18%) | 26.30%<br>(25.49% - 27.16%) | 22.25%<br>(21.61% - 22.89%) | 19.53%<br>(18.43% - 20.60%) | 10.12%<br>(8.97% - 11.34%)  | 9.28%<br>(8.19% - 10.36%)  | 6.96%<br>(6.30% - 7.65%) | 6.04%<br>(5.05% - 7.04%) | 2.05%<br>(1.50% - 2.68%) | 1.82%<br>(1.30% - 2.38%) | 1.11%<br>(0.83% - 1.43%) | 0.99%<br>(0.61% - 1.43%) |
| <i>Cotabato (North Cotabato)</i> | 27.22%<br>(26.34% - 28.09%) | 25.58%<br>(24.67% - 26.47%) | 22.29%<br>(21.69% - 22.93%) | 19.32%<br>(18.30% - 20.30%) | 9.85%<br>(8.74% - 11.04%)   | 8.99%<br>(7.88% - 10.03%)  | 6.97%<br>(6.30% - 7.60%) | 5.95%<br>(5.03% - 6.91%) | 2.04%<br>(1.52% - 2.65%) | 1.76%<br>(1.27% - 2.28%) | 1.11%<br>(0.81% - 1.43%) | 0.97%<br>(0.62% - 1.37%) |
| <i>Sarangani</i>                 | 27.97%<br>(27.02% - 28.97%) | 26.05%<br>(25.13% - 26.97%) | 22.61%<br>(21.94% - 23.29%) | 19.59%<br>(18.51% - 20.71%) | 10.11%<br>(8.97% - 11.26%)  | 9.15%<br>(8.14% - 10.25%)  | 7.11%<br>(6.37% - 7.80%) | 6.04%<br>(5.08% - 7.06%) | 2.06%<br>(1.53% - 2.68%) | 1.77%<br>(1.30% - 2.38%) | 1.14%<br>(0.81% - 1.48%) | 0.98%<br>(0.61% - 1.42%) |
| <i>Agusan Del Norte</i>          | 26.82%<br>(25.95% - 27.79%) | 24.77%<br>(23.88% - 25.75%) | 21.23%<br>(20.62% - 21.88%) | 17.50%<br>(16.50% - 18.56%) | 9.61%<br>(8.53% - 10.89%)   | 8.57%<br>(7.52% - 9.68%)   | 6.36%<br>(5.73% - 7.00%) | 5.04%<br>(4.19% - 5.91%) | 1.96%<br>(1.47% - 2.63%) | 1.64%<br>(1.20% - 2.16%) | 0.94%<br>(0.69% - 1.23%) | 0.73%<br>(0.44% - 1.08%) |

Table S8c. Estimated overall, severe, and extreme **underweight** prevalence (%) in children under 5 years, both sexes, in 1990, 2000, 2010, and 2020.

| Location                                | Total                       |                             |                             |                             | Severe                      |                             |                             |                             | Extreme                  |                          |                          |                          |
|-----------------------------------------|-----------------------------|-----------------------------|-----------------------------|-----------------------------|-----------------------------|-----------------------------|-----------------------------|-----------------------------|--------------------------|--------------------------|--------------------------|--------------------------|
|                                         | 1990                        | 2000                        | 2010                        | 2020                        | 1990                        | 2000                        | 2010                        | 2020                        | 1990                     | 2000                     | 2010                     | 2020                     |
| <i>Agusan Del Sur</i>                   | 26.71%<br>(25.78% - 27.57%) | 24.65%<br>(23.75% - 25.51%) | 20.95%<br>(20.33% - 21.55%) | 18.35%<br>(17.34% - 19.38%) | 9.42%<br>(8.30% - 10.57%)   | 8.40%<br>(7.41% - 9.41%)    | 6.20%<br>(5.57% - 6.84%)    | 5.43%<br>(4.56% - 6.31%)    | 1.87%<br>(1.41% - 2.44%) | 1.56%<br>(1.16% - 2.06%) | 0.90%<br>(0.65% - 1.19%) | 0.82%<br>(0.52% - 1.19%) |
| <i>Surigao Del Sur</i>                  | 28.21%<br>(27.29% - 29.13%) | 25.92%<br>(25.00% - 26.86%) | 21.16%<br>(20.52% - 21.81%) | 17.59%<br>(16.50% - 18.59%) | 9.96%<br>(8.84% - 11.07%)   | 8.95%<br>(7.90% - 10.01%)   | 6.35%<br>(5.71% - 6.96%)    | 5.10%<br>(4.28% - 5.96%)    | 1.96%<br>(1.45% - 2.54%) | 1.69%<br>(1.21% - 2.22%) | 0.95%<br>(0.67% - 1.23%) | 0.75%<br>(0.46% - 1.09%) |
| <i>Surigao Del Norte</i>                | 28.16%<br>(27.28% - 29.08%) | 25.76%<br>(24.81% - 26.64%) | 21.06%<br>(20.43% - 21.66%) | 17.98%<br>(16.94% - 19.00%) | 9.94%<br>(8.76% - 11.11%)   | 8.77%<br>(7.71% - 9.88%)    | 6.26%<br>(5.61% - 6.91%)    | 5.26%<br>(4.39% - 6.08%)    | 1.96%<br>(1.45% - 2.56%) | 1.62%<br>(1.16% - 2.20%) | 0.92%<br>(0.66% - 1.21%) | 0.78%<br>(0.48% - 1.13%) |
| <i>Dinagat Islands</i>                  | 28.91%<br>(27.97% - 29.81%) | 26.24%<br>(25.32% - 27.10%) | 21.22%<br>(20.56% - 21.87%) | 17.60%<br>(16.48% - 18.67%) | 10.06%<br>(8.88% - 11.19%)  | 8.94%<br>(7.91% - 10.08%)   | 6.42%<br>(5.76% - 7.11%)    | 5.09%<br>(4.19% - 5.94%)    | 1.92%<br>(1.43% - 2.51%) | 1.64%<br>(1.20% - 2.22%) | 0.97%<br>(0.69% - 1.27%) | 0.74%<br>(0.45% - 1.07%) |
| <i>Tawi-Tawi</i>                        | 28.27%<br>(27.43% - 29.11%) | 27.23%<br>(26.34% - 28.07%) | 24.05%<br>(23.36% - 24.74%) | 21.07%<br>(20.04% - 22.10%) | 11.39%<br>(10.17% - 12.58%) | 10.55%<br>(9.43% - 11.65%)  | 8.34%<br>(7.56% - 9.06%)    | 7.28%<br>(6.27% - 8.31%)    | 2.82%<br>(2.17% - 3.60%) | 2.42%<br>(1.83% - 3.06%) | 1.59%<br>(1.19% - 2.00%) | 1.44%<br>(0.98% - 1.96%) |
| <i>Basilan</i>                          | 30.58%<br>(29.68% - 31.48%) | 28.31%<br>(27.46% - 29.22%) | 23.92%<br>(23.23% - 24.64%) | 21.24%<br>(20.28% - 22.21%) | 11.92%<br>(10.66% - 13.22%) | 10.84%<br>(9.67% - 12.00%)  | 8.38%<br>(7.65% - 9.13%)    | 7.33%<br>(6.36% - 8.37%)    | 2.74%<br>(2.07% - 3.55%) | 2.41%<br>(1.83% - 3.11%) | 1.63%<br>(1.23% - 2.07%) | 1.44%<br>(1.02% - 1.97%) |
| <i>Sulu</i>                             | 28.50%<br>(27.63% - 29.45%) | 27.04%<br>(26.18% - 27.90%) | 24.03%<br>(23.37% - 24.70%) | 21.37%<br>(20.34% - 22.34%) | 11.46%<br>(10.28% - 12.66%) | 10.52%<br>(9.47% - 11.57%)  | 8.38%<br>(7.59% - 9.15%)    | 7.38%<br>(6.32% - 8.43%)    | 2.82%<br>(2.19% - 3.57%) | 2.44%<br>(1.88% - 3.05%) | 1.62%<br>(1.22% - 2.04%) | 1.45%<br>(0.96% - 1.99%) |
| <i>Maguindanao</i>                      | 29.65%<br>(28.77% - 30.58%) | 27.76%<br>(26.83% - 28.65%) | 23.98%<br>(23.34% - 24.66%) | 21.17%<br>(20.08% - 22.18%) | 11.81%<br>(10.61% - 13.07%) | 10.80%<br>(9.69% - 11.93%)  | 8.38%<br>(7.61% - 9.15%)    | 7.30%<br>(6.25% - 8.31%)    | 2.85%<br>(2.18% - 3.61%) | 2.49%<br>(1.89% - 3.13%) | 1.62%<br>(1.23% - 2.06%) | 1.44%<br>(0.98% - 1.94%) |
| <i>Lanao Del Sur</i>                    | 29.42%<br>(28.54% - 30.36%) | 27.59%<br>(26.69% - 28.42%) | 23.83%<br>(23.15% - 24.46%) | 22.01%<br>(20.95% - 23.06%) | 11.73%<br>(10.56% - 13.07%) | 10.71%<br>(9.60% - 11.82%)  | 8.31%<br>(7.56% - 9.05%)    | 7.73%<br>(6.70% - 8.78%)    | 2.83%<br>(2.21% - 3.63%) | 2.46%<br>(1.89% - 3.12%) | 1.60%<br>(1.21% - 2.01%) | 1.56%<br>(1.09% - 2.09%) |
| <i>National Capital Region</i>          | 18.90%<br>(18.07% - 19.85%) | 17.32%<br>(16.50% - 18.18%) | 14.42%<br>(13.88% - 14.95%) | 12.49%<br>(11.62% - 13.31%) | 6.30%<br>(5.61% - 7.11%)    | 5.32%<br>(4.68% - 5.99%)    | 3.77%<br>(3.38% - 4.15%)    | 3.19%<br>(2.64% - 3.74%)    | 1.21%<br>(0.95% - 1.54%) | 0.87%<br>(0.66% - 1.13%) | 0.43%<br>(0.31% - 0.57%) | 0.35%<br>(0.20% - 0.52%) |
| <i>Sri Lanka</i>                        | 27.63%<br>(26.97% - 28.34%) | 23.79%<br>(23.19% - 24.40%) | 20.41%<br>(19.74% - 21.09%) | 18.20%<br>(17.41% - 19.00%) | 9.15%<br>(8.34% - 9.98%)    | 7.88%<br>(7.23% - 8.56%)    | 6.68%<br>(6.07% - 7.26%)    | 5.84%<br>(5.21% - 6.53%)    | 1.53%<br>(1.20% - 1.93%) | 1.38%<br>(1.11% - 1.68%) | 1.19%<br>(0.95% - 1.43%) | 1.03%<br>(0.80% - 1.31%) |
| <i>Thailand</i>                         | 16.53%<br>(15.84% - 17.23%) | 10.89%<br>(10.26% - 11.61%) | 7.99%<br>(7.47% - 8.51%)    | 7.08%<br>(6.63% - 7.57%)    | 4.20%<br>(3.70% - 4.75%)    | 2.13%<br>(1.81% - 2.50%)    | 1.31%<br>(1.13% - 1.53%)    | 1.13%<br>(0.96% - 1.30%)    | 0.45%<br>(0.32% - 0.60%) | 0.09%<br>(0.04% - 0.16%) | 0.02%<br>(0.01% - 0.04%) | 0.01%<br>(0.00% - 0.02%) |
| <i>Mauritius</i>                        | 17.65%<br>(17.19% - 18.15%) | 13.27%<br>(12.64% - 13.91%) | 11.76%<br>(11.00% - 12.48%) | 11.15%<br>(10.42% - 11.93%) | 5.54%<br>(5.15% - 5.97%)    | 3.56%<br>(3.14% - 3.97%)    | 2.96%<br>(2.54% - 3.38%)    | 2.80%<br>(2.41% - 3.22%)    | 0.93%<br>(0.78% - 1.10%) | 0.43%<br>(0.32% - 0.56%) | 0.31%<br>(0.19% - 0.43%) | 0.29%<br>(0.18% - 0.41%) |
| <i>Seychelles</i>                       | 6.77%<br>(6.21% - 7.42%)    | 6.13%<br>(5.64% - 6.68%)    | 4.91%<br>(4.49% - 5.37%)    | 4.36%<br>(3.98% - 4.74%)    | 0.92%<br>(0.73% - 1.14%)    | 0.74%<br>(0.58% - 0.93%)    | 0.41%<br>(0.31% - 0.53%)    | 0.32%<br>(0.23% - 0.41%)    | 0.00%<br>(0.00% - 0.01%) | 0.00%<br>(0.00% - 0.00%) | 0.00%<br>(0.00% - 0.00%) | 0.00%<br>(0.00% - 0.00%) |
| <i>Timor-Leste</i>                      | 40.29%<br>(38.63% - 42.11%) | 38.17%<br>(36.93% - 39.66%) | 34.40%<br>(33.66% - 35.28%) | 32.45%<br>(31.74% - 33.31%) | 16.39%<br>(15.06% - 17.88%) | 16.73%<br>(15.59% - 18.05%) | 15.83%<br>(14.52% - 17.14%) | 14.81%<br>(13.63% - 16.13%) | 3.42%<br>(2.60% - 4.56%) | 4.20%<br>(3.31% - 5.46%) | 4.56%<br>(3.50% - 5.73%) | 4.27%<br>(3.30% - 5.46%) |
| <i>Viet Nam</i>                         | 31.10%<br>(30.34% - 31.93%) | 25.23%<br>(24.66% - 25.76%) | 17.88%<br>(17.30% - 18.41%) | 14.31%<br>(13.55% - 15.09%) | 11.19%<br>(10.20% - 12.24%) | 8.50%<br>(7.83% - 9.19%)    | 5.14%<br>(4.69% - 5.59%)    | 3.68%<br>(3.19% - 4.17%)    | 2.15%<br>(1.67% - 2.74%) | 1.50%<br>(1.20% - 1.85%) | 0.72%<br>(0.57% - 0.88%) | 0.41%<br>(0.28% - 0.56%) |
| <b>Sub-Saharan Africa</b>               | 23.77%<br>(23.64% - 23.90%) | 23.55%<br>(23.40% - 23.68%) | 20.51%<br>(20.39% - 20.63%) | 18.00%<br>(17.86% - 18.16%) | 9.32%<br>(9.14% - 9.51%)    | 9.34%<br>(9.16% - 9.51%)    | 7.52%<br>(7.38% - 7.65%)    | 6.26%<br>(6.11% - 6.42%)    | 2.48%<br>(2.33% - 2.63%) | 2.57%<br>(2.43% - 2.71%) | 1.91%<br>(1.80% - 2.02%) | 1.49%<br>(1.39% - 1.60%) |
| <b>Central Sub-Saharan Africa</b>       | 25.41%<br>(24.96% - 25.86%) | 25.81%<br>(25.37% - 26.22%) | 22.11%<br>(21.67% - 22.51%) | 18.95%<br>(18.40% - 19.45%) | 9.99%<br>(9.47% - 10.57%)   | 10.36%<br>(9.87% - 10.87%)  | 7.67%<br>(7.25% - 8.13%)    | 6.19%<br>(5.70% - 6.74%)    | 2.37%<br>(2.07% - 2.73%) | 2.57%<br>(2.25% - 2.93%) | 1.53%<br>(1.30% - 1.79%) | 1.13%<br>(0.90% - 1.41%) |
| <i>Angola</i>                           | 29.94%<br>(29.06% - 30.77%) | 26.66%<br>(25.87% - 27.41%) | 20.28%<br>(19.42% - 21.11%) | 17.22%<br>(16.38% - 17.97%) | 12.31%<br>(11.30% - 13.40%) | 9.98%<br>(9.11% - 10.86%)   | 5.71%<br>(4.97% - 6.38%)    | 4.74%<br>(4.10% - 5.35%)    | 3.02%<br>(2.41% - 3.74%) | 2.14%<br>(1.72% - 2.62%) | 0.76%<br>(0.55% - 0.98%) | 0.61%<br>(0.43% - 0.82%) |
| <i>Central African Republic</i>         | 21.82%<br>(21.10% - 22.57%) | 22.00%<br>(21.38% - 22.65%) | 22.28%<br>(21.67% - 22.94%) | 21.59%<br>(20.81% - 22.37%) | 7.96%<br>(7.19% - 8.75%)    | 8.13%<br>(7.46% - 8.77%)    | 8.30%<br>(7.61% - 8.99%)    | 7.88%<br>(7.06% - 8.70%)    | 1.72%<br>(1.35% - 2.13%) | 1.79%<br>(1.46% - 2.13%) | 1.85%<br>(1.49% - 2.24%) | 1.71%<br>(1.29% - 2.15%) |
| <i>Congo</i>                            | 13.87%<br>(13.18% - 14.54%) | 13.54%<br>(12.83% - 14.26%) | 11.91%<br>(11.28% - 12.53%) | 10.71%<br>(10.06% - 11.40%) | 3.55%<br>(3.16% - 4.00%)    | 2.94%<br>(2.55% - 3.36%)    | 2.36%<br>(2.06% - 2.67%)    | 2.17%<br>(1.85% - 2.50%)    | 0.40%<br>(0.30% - 0.53%) | 0.21%<br>(0.13% - 0.31%) | 0.11%<br>(0.06% - 0.18%) | 0.11%<br>(0.05% - 0.18%) |
| <i>Democratic Republic of the Congo</i> | 25.47%<br>(24.87% - 26.08%) | 26.99%<br>(26.39% - 27.57%) | 23.81%<br>(23.21% - 24.35%) | 20.22%<br>(19.47% - 20.96%) | 10.11%<br>(9.42% - 10.85%)  | 11.32%<br>(10.63% - 12.01%) | 8.84%<br>(8.24% - 9.44%)    | 6.98%<br>(6.24% - 7.78%)    | 2.41%<br>(2.02% - 2.89%) | 2.97%<br>(2.52% - 3.46%) | 1.91%<br>(1.57% - 2.29%) | 1.37%<br>(1.03% - 1.79%) |
| <i>Equatorial Guinea</i>                | 18.21%<br>(17.31% - 19.06%) | 13.88%<br>(13.38% - 14.38%) | 6.30%<br>(6.00% - 6.64%)    | 5.47%<br>(5.06% - 5.86%)    | 3.95%<br>(3.33% - 4.63%)    | 2.94%<br>(2.64% - 3.26%)    | 0.80%<br>(0.71% - 0.91%)    | 0.72%<br>(0.60% - 0.85%)    | 0.35%<br>(0.20% - 0.57%) | 0.23%<br>(0.17% - 0.31%) | 0.00%<br>(0.00% - 0.00%) | 0.00%<br>(0.00% - 0.00%) |

**Table S8c. Estimated overall, severe, and extreme underweight prevalence (%) in children under 5 years, both sexes, in 1990, 2000, 2010, and 2020.**

| Location                          | Total                       |                             |                             |                             | Severe                      |                             |                             |                             | Extreme                   |                           |                           |                           |
|-----------------------------------|-----------------------------|-----------------------------|-----------------------------|-----------------------------|-----------------------------|-----------------------------|-----------------------------|-----------------------------|---------------------------|---------------------------|---------------------------|---------------------------|
|                                   | 1990                        | 2000                        | 2010                        | 2020                        | 1990                        | 2000                        | 2010                        | 2020                        | 1990                      | 2000                      | 2010                      | 2020                      |
| Gabon                             | 9.67%<br>( 9.09% - 10.29%)  | 8.72%<br>( 8.23% - 9.25%)   | 6.83%<br>( 6.39% - 7.27%)   | 5.66%<br>( 5.27% - 6.09%)   | 1.39%<br>( 1.16% - 1.66%)   | 1.25%<br>( 1.05% - 1.45%)   | 0.92%<br>( 0.76% - 1.10%)   | 0.77%<br>( 0.64% - 0.92%)   | 0.03%<br>( 0.01% - 0.06%) | 0.02%<br>( 0.01% - 0.05%) | 0.01%<br>( 0.00% - 0.02%) | 0.00%<br>( 0.00% - 0.01%) |
| <b>Eastern Sub-Saharan Africa</b> | 25.37%<br>(25.17% - 25.56%) | 24.36%<br>(24.18% - 24.53%) | 19.84%<br>(19.68% - 20.01%) | 16.83%<br>(16.63% - 17.03%) | 9.58%<br>( 9.36% - 9.80%)   | 9.22%<br>( 9.01% - 9.44%)   | 5.66%<br>( 6.40% - 6.74%)   | 5.18%<br>( 5.01% - 5.34%)   | 2.23%<br>( 2.09% - 2.37%) | 2.23%<br>( 2.10% - 2.37%) | 1.35%<br>( 1.26% - 1.44%) | 0.96%<br>( 0.89% - 1.04%) |
| Burundi                           | 29.21%<br>(28.50% - 29.94%) | 30.43%<br>(29.75% - 31.12%) | 26.42%<br>(25.78% - 27.03%) | 25.04%<br>(24.27% - 25.80%) | 12.04%<br>(11.02% - 13.10%) | 13.37%<br>(12.39% - 14.48%) | 9.80%<br>( 8.99% - 10.57%)  | 8.60%<br>( 7.73% - 9.51%)   | 3.00%<br>( 2.37% - 3.71%) | 3.68%<br>( 3.02% - 4.43%) | 2.08%<br>( 1.68% - 2.52%) | 1.60%<br>( 1.22% - 2.05%) |
| Comoros                           | 22.73%<br>(21.91% - 23.59%) | 22.00%<br>(21.30% - 22.69%) | 17.71%<br>(16.96% - 18.40%) | 15.69%<br>(14.91% - 16.48%) | 8.55%<br>( 7.73% - 9.44%)   | 8.66%<br>( 7.98% - 9.38%)   | 5.77%<br>( 5.20% - 6.35%)   | 4.78%<br>( 4.22% - 5.35%)   | 1.96%<br>( 1.58% - 2.43%) | 2.16%<br>( 1.81% - 2.56%) | 1.06%<br>( 0.85% - 1.29%) | 0.78%<br>( 0.58% - 0.99%) |
| Djibouti                          | 23.96%<br>(23.18% - 24.70%) | 25.61%<br>(24.86% - 26.31%) | 25.50%<br>(24.81% - 26.12%) | 23.38%<br>(22.56% - 24.18%) | 10.69%<br>( 9.77% - 11.53%) | 12.13%<br>(11.24% - 12.93%) | 12.14%<br>(11.42% - 12.91%) | 10.65%<br>( 9.77% - 11.60%) | 3.25%<br>( 2.72% - 3.77%) | 4.09%<br>( 3.50% - 4.66%) | 4.11%<br>( 3.60% - 4.66%) | 3.38%<br>( 2.84% - 4.00%) |
| Eritrea                           | 35.48%<br>(34.76% - 36.23%) | 32.53%<br>(31.85% - 33.24%) | 30.37%<br>(29.66% - 31.09%) | 27.34%<br>(26.56% - 28.14%) | 18.40%<br>(16.97% - 19.89%) | 15.76%<br>(14.53% - 16.90%) | 14.34%<br>(13.23% - 15.50%) | 12.31%<br>(11.21% - 13.41%) | 6.68%<br>( 5.19% - 8.42%) | 5.15%<br>( 4.10% - 6.30%) | 4.55%<br>( 3.63% - 5.63%) | 3.69%<br>( 2.91% - 4.57%) |
| Ethiopia                          | 33.16%<br>(32.73% - 33.66%) | 32.10%<br>(31.70% - 32.54%) | 26.08%<br>(25.68% - 26.50%) | 21.13%<br>(20.67% - 21.56%) | 13.85%<br>(13.28% - 14.46%) | 13.93%<br>(13.37% - 14.53%) | 9.78%<br>( 9.31% - 10.28%)  | 7.05%<br>( 6.63% - 7.49%)   | 3.51%<br>( 3.11% - 3.98%) | 3.83%<br>( 3.43% - 4.28%) | 2.16%<br>( 1.91% - 2.43%) | 1.32%<br>( 1.14% - 1.51%) |
| Kenya                             | 17.05%<br>(16.73% - 17.40%) | 16.27%<br>(15.93% - 16.60%) | 14.14%<br>(13.81% - 14.48%) | 11.87%<br>(11.56% - 12.18%) | 4.54%<br>( 4.29% - 4.81%)   | 4.15%<br>( 3.90% - 4.40%)   | 3.26%<br>( 3.05% - 3.48%)   | 2.57%<br>( 2.39% - 2.75%)   | 0.66%<br>( 0.58% - 0.75%) | 0.56%<br>( 0.48% - 0.65%) | 0.37%<br>( 0.31% - 0.44%) | 0.26%<br>( 0.22% - 0.31%) |
| <i>Baringo</i>                    | 20.88%<br>(19.53% - 22.15%) | 19.81%<br>(18.34% - 21.18%) | 16.91%<br>(15.50% - 18.17%) | 13.61%<br>(12.56% - 14.74%) | 5.36%<br>( 4.34% - 6.48%)   | 4.82%<br>( 3.73% - 5.87%)   | 3.79%<br>( 2.90% - 4.69%)   | 2.73%<br>( 2.13% - 3.37%)   | 0.75%<br>( 0.45% - 1.14%) | 0.58%<br>( 0.33% - 0.86%) | 0.37%<br>( 0.20% - 0.61%) | 0.19%<br>( 0.09% - 0.34%) |
| <i>Bomet</i>                      | 17.81%<br>(16.58% - 19.01%) | 16.00%<br>(14.69% - 17.25%) | 11.69%<br>(10.60% - 12.74%) | 8.94%<br>( 7.93% - 10.01%)  | 5.04%<br>( 3.92% - 6.20%)   | 4.24%<br>( 3.23% - 5.28%)   | 2.30%<br>( 1.68% - 3.07%)   | 1.45%<br>( 1.00% - 2.00%)   | 0.80%<br>( 0.41% - 1.31%) | 0.58%<br>( 0.28% - 0.98%) | 0.15%<br>( 0.02% - 0.37%) | 0.04%<br>( 0.00% - 0.14%) |
| <i>Bungoma</i>                    | 21.24%<br>(19.98% - 22.36%) | 19.82%<br>(18.72% - 20.87%) | 17.75%<br>(16.71% - 18.92%) | 14.39%<br>(13.41% - 15.48%) | 6.49%<br>( 5.34% - 7.63%)   | 5.85%<br>( 4.83% - 6.81%)   | 4.88%<br>( 4.05% - 5.84%)   | 3.49%<br>( 2.84% - 4.20%)   | 1.01%<br>( 0.61% - 1.51%) | 0.86%<br>( 0.53% - 1.24%) | 0.64%<br>( 0.38% - 1.01%) | 0.34%<br>( 0.17% - 0.54%) |
| <i>Busia</i>                      | 19.03%<br>(17.84% - 20.17%) | 17.34%<br>(16.11% - 18.52%) | 14.93%<br>(13.78% - 16.10%) | 11.77%<br>(10.71% - 12.89%) | 5.80%<br>( 4.73% - 6.94%)   | 4.77%<br>( 3.75% - 5.82%)   | 3.76%<br>( 3.00% - 4.67%)   | 2.63%<br>( 2.01% - 3.36%)   | 1.09%<br>( 0.63% - 1.66%) | 0.70%<br>( 0.34% - 1.14%) | 0.44%<br>( 0.22% - 0.78%) | 0.25%<br>( 0.09% - 0.47%) |
| <i>Elgeyo-Marakwet</i>            | 19.67%<br>(18.23% - 21.04%) | 17.78%<br>(16.42% - 19.10%) | 13.34%<br>(12.11% - 14.63%) | 9.94%<br>( 8.89% - 11.02%)  | 4.11%<br>( 3.03% - 5.22%)   | 3.60%<br>( 2.63% - 4.64%)   | 2.19%<br>( 1.56% - 2.92%)   | 1.47%<br>( 1.03% - 1.97%)   | 0.32%<br>( 0.10% - 0.61%) | 0.28%<br>( 0.08% - 0.59%) | 0.12%<br>( 0.02% - 0.32%) | 0.05%<br>( 0.00% - 0.16%) |
| <i>Embu</i>                       | 7.64%<br>( 6.66% - 8.64%)   | 6.95%<br>( 6.05% - 7.88%)   | 7.51%<br>( 6.59% - 8.53%)   | 6.53%<br>( 5.66% - 7.40%)   | 0.81%<br>( 0.52% - 1.16%)   | 0.74%<br>( 0.48% - 1.05%)   | 0.86%<br>( 0.54% - 1.24%)   | 0.78%<br>( 0.49% - 1.12%)   | 0.00%<br>( 0.00% - 0.02%) | 0.00%<br>( 0.00% - 0.01%) | 0.00%<br>( 0.00% - 0.03%) | 0.00%<br>( 0.00% - 0.03%) |
| <i>Garissa</i>                    | 21.29%<br>(20.05% - 22.55%) | 20.16%<br>(18.90% - 21.37%) | 16.97%<br>(15.82% - 18.17%) | 15.55%<br>(14.42% - 16.63%) | 4.97%<br>( 3.90% - 6.04%)   | 4.65%<br>( 3.65% - 5.66%)   | 4.10%<br>( 3.23% - 5.03%)   | 3.60%<br>( 2.80% - 4.40%)   | 0.60%<br>( 0.27% - 1.06%) | 0.55%<br>( 0.23% - 0.95%) | 0.57%<br>( 0.26% - 1.00%) | 0.44%<br>( 0.18% - 0.76%) |
| <i>HomaBay</i>                    | 18.07%<br>(16.89% - 19.22%) | 16.90%<br>(15.74% - 17.96%) | 13.41%<br>(12.36% - 14.56%) | 10.43%<br>( 9.45% - 11.40%) | 4.47%<br>( 3.59% - 5.40%)   | 4.54%<br>( 3.70% - 5.43%)   | 3.32%<br>( 2.65% - 4.12%)   | 2.25%<br>( 1.76% - 2.86%)   | 0.66%<br>( 0.35% - 1.02%) | 0.70%<br>( 0.38% - 1.09%) | 0.42%<br>( 0.21% - 0.72%) | 0.21%<br>( 0.08% - 0.39%) |
| <i>Isiolo</i>                     | 14.72%<br>(13.25% - 16.14%) | 13.75%<br>(12.44% - 15.09%) | 13.63%<br>(12.36% - 15.01%) | 10.66%<br>( 9.66% - 11.77%) | 2.16%<br>( 1.47% - 2.92%)   | 1.97%<br>( 1.38% - 2.73%)   | 2.25%<br>( 1.62% - 3.02%)   | 1.70%<br>( 1.22% - 2.25%)   | 0.07%<br>( 0.01% - 0.18%) | 0.08%<br>( 0.02% - 0.17%) | 0.09%<br>( 0.03% - 0.21%) | 0.04%<br>( 0.00% - 0.11%) |
| <i>Kajiado</i>                    | 17.72%<br>(16.49% - 18.88%) | 15.79%<br>(14.55% - 17.01%) | 10.04%<br>( 9.01% - 11.17%) | 7.06%<br>( 6.24% - 7.90%)   | 5.55%<br>( 4.38% - 6.74%)   | 4.50%<br>( 3.51% - 5.55%)   | 1.74%<br>( 1.24% - 2.36%)   | 1.00%<br>( 0.69% - 1.37%)   | 1.05%<br>( 0.55% - 1.63%) | 0.71%<br>( 0.35% - 1.13%) | 0.06%<br>( 0.00% - 0.18%) | 0.01%<br>( 0.00% - 0.05%) |
| <i>Kakamega</i>                   | 18.26%<br>(17.14% - 19.39%) | 17.59%<br>(16.44% - 18.84%) | 15.45%<br>(14.37% - 16.52%) | 12.50%<br>(11.51% - 13.59%) | 4.78%<br>( 4.00% - 5.63%)   | 4.14%<br>( 3.31% - 4.99%)   | 2.44%<br>( 2.64% - 4.04%)   | 2.31%<br>( 1.89% - 3.04%)   | 0.60%<br>( 0.40% - 0.85%) | 0.40%<br>( 0.20% - 0.64%) | 0.23%<br>( 0.10% - 0.41%) | 0.13%<br>( 0.03% - 0.27%) |
| <i>Kericho</i>                    | 18.49%<br>(17.14% - 19.70%) | 14.69%<br>(13.41% - 15.90%) | 12.84%<br>(11.67% - 14.00%) | 9.73%<br>( 8.78% - 10.68%)  | 4.80%<br>( 3.86% - 5.75%)   | 3.10%<br>( 2.41% - 3.85%)   | 2.59%<br>( 1.94% - 3.29%)   | 1.70%<br>( 1.29% - 2.18%)   | 0.59%<br>( 0.35% - 0.90%) | 0.29%<br>( 0.15% - 0.49%) | 0.21%<br>( 0.07% - 0.41%) | 0.08%<br>( 0.02% - 0.19%) |
| <i>Kiambu</i>                     | 17.75%<br>(16.71% - 18.77%) | 16.31%<br>(15.30% - 17.31%) | 12.56%<br>(11.65% - 13.48%) | 9.68%<br>( 8.90% - 10.49%)  | 5.69%<br>( 4.85% - 6.58%)   | 4.85%<br>( 4.09% - 5.66%)   | 3.06%<br>( 2.47% - 3.72%)   | 2.04%<br>( 1.64% - 2.50%)   | 1.03%<br>( 0.69% - 1.44%) | 0.75%<br>( 0.48% - 1.07%) | 0.31%<br>( 0.14% - 0.55%) | 0.14%<br>( 0.04% - 0.27%) |
| <i>Kilifi</i>                     | 21.57%<br>(20.56% - 22.63%) | 20.14%<br>(19.06% - 21.19%) | 15.53%<br>(14.47% - 16.62%) | 13.01%<br>(12.03% - 13.99%) | 6.39%<br>( 5.35% - 7.52%)   | 5.83%<br>( 4.83% - 6.88%)   | 3.58%<br>( 2.89% - 4.34%)   | 2.85%<br>( 2.27% - 3.45%)   | 0.93%<br>( 0.56% - 1.38%) | 0.82%<br>( 0.50% - 1.23%) | 0.32%<br>( 0.16% - 0.51%) | 0.21%<br>( 0.10% - 0.37%) |
| <i>Kirinyaga</i>                  | 9.78%<br>( 8.67% - 10.86%)  | 9.24%<br>( 8.27% - 10.26%)  | 9.83%<br>( 8.86% - 10.84%)  | 9.82%<br>( 8.87% - 10.83%)  | 1.22%<br>( 0.84% - 1.68%)   | 1.17%<br>( 0.82% - 1.56%)   | 1.57%<br>( 1.18% - 2.02%)   | 1.78%<br>( 1.37% - 2.23%)   | 0.01%<br>( 0.00% - 0.07%) | 0.01%<br>( 0.00% - 0.05%) | 0.06%<br>( 0.01% - 0.14%) | 0.08%<br>( 0.02% - 0.16%) |

Table S8c. Estimated overall, severe, and extreme **underweight** prevalence (%) in children under 5 years, both sexes, in 1990, 2000, 2010, and 2020.

| Location  | Total             |                   |                   |                   | Severe           |                 |                 |                 | Extreme         |                 |                 |                 |
|-----------|-------------------|-------------------|-------------------|-------------------|------------------|-----------------|-----------------|-----------------|-----------------|-----------------|-----------------|-----------------|
|           | 1990              | 2000              | 2010              | 2020              | 1990             | 2000            | 2010            | 2020            | 1990            | 2000            | 2010            | 2020            |
| Kisii     | 16.62%            | 15.40%            | 12.86%            | 10.48%            | 3.59%            | 3.05%           | 2.49%           | 1.82%           | 0.30%           | 0.21%           | 0.15%           | 0.08%           |
|           | (15.57% - 17.82%) | (14.29% - 16.61%) | (11.75% - 14.01%) | (9.45% - 11.56%)  | (2.72% - 4.53%)  | (2.27% - 3.88%) | (1.86% - 3.23%) | (1.30% - 2.45%) | (0.09% - 0.58%) | (0.04% - 0.46%) | (0.03% - 0.34%) | (0.00% - 0.22%) |
| Kisumu    | 16.27%            | 16.84%            | 13.05%            | 10.24%            | 4.66%            | 4.68%           | 2.63%           | 1.91%           | 0.75%           | 0.70%           | 0.22%           | 0.10%           |
|           | (15.09% - 17.43%) | (15.63% - 17.99%) | (11.74% - 14.27%) | (9.18% - 11.29%)  | (3.84% - 5.58%)  | (3.78% - 5.59%) | (1.98% - 3.32%) | (1.42% - 2.44%) | (0.48% - 1.08%) | (0.44% - 1.02%) | (0.11% - 0.37%) | (0.03% - 0.20%) |
| Kitui     | 22.51%            | 21.73%            | 18.42%            | 15.43%            | 6.20%            | 5.79%           | 4.35%           | 3.52%           | 0.83%           | 0.71%           | 0.41%           | 0.30%           |
|           | (21.26% - 23.68%) | (20.56% - 22.84%) | (17.28% - 19.54%) | (14.34% - 16.52%) | (5.10% - 7.41%)  | (4.67% - 7.02%) | (3.47% - 5.37%) | (2.79% - 4.29%) | (0.48% - 1.34%) | (0.37% - 1.17%) | (0.20% - 0.73%) | (0.13% - 0.53%) |
| Kwale     | 12.64%            | 12.83%            | 11.34%            | 8.92%             | 1.84%            | 2.10%           | 2.08%           | 1.50%           | 0.10%           | 0.14%           | 0.18%           | 0.11%           |
|           | (11.50% - 13.77%) | (11.75% - 13.98%) | (10.29% - 12.42%) | (8.06% - 9.85%)   | (1.28% - 2.53%)  | (1.47% - 2.81%) | (1.46% - 2.74%) | (1.03% - 2.01%) | (0.00% - 0.27%) | (0.01% - 0.34%) | (0.04% - 0.39%) | (0.01% - 0.26%) |
| Laikipia  | 14.47%            | 14.11%            | 11.64%            | 9.13%             | 3.56%            | 3.67%           | 2.77%           | 1.96%           | 0.46%           | 0.52%           | 0.39%           | 0.23%           |
|           | (13.27% - 15.72%) | (12.96% - 15.29%) | (10.62% - 12.66%) | (8.25% - 10.08%)  | (2.89% - 4.35%)  | (2.96% - 4.46%) | (2.16% - 3.44%) | (1.50% - 2.49%) | (0.28% - 0.69%) | (0.32% - 0.82%) | (0.21% - 0.63%) | (0.11% - 0.38%) |
| Lamu      | 14.23%            | 13.66%            | 10.92%            | 8.98%             | 4.10%            | 3.74%           | 2.00%           | 1.42%           | 0.73%           | 0.59%           | 0.10%           | 0.03%           |
|           | (13.17% - 15.31%) | (12.61% - 14.79%) | (9.81% - 12.06%)  | (8.00% - 9.99%)   | (3.35% - 4.90%)  | (3.01% - 4.63%) | (1.45% - 2.68%) | (0.99% - 1.91%) | (0.45% - 1.11%) | (0.34% - 0.94%) | (0.02% - 0.25%) | (0.00% - 0.12%) |
| Machakos  | 16.02%            | 14.96%            | 12.26%            | 9.94%             | 3.71%            | 3.21%           | 2.45%           | 1.86%           | 0.39%           | 0.27%           | 0.16%           | 0.10%           |
|           | (14.82% - 17.26%) | (13.70% - 16.15%) | (11.23% - 13.36%) | (8.96% - 10.92%)  | (2.92% - 4.63%)  | (2.44% - 4.00%) | (1.87% - 3.12%) | (1.41% - 2.35%) | (0.21% - 0.64%) | (0.12% - 0.46%) | (0.06% - 0.32%) | (0.04% - 0.20%) |
| Makueni   | 13.98%            | 13.26%            | 11.69%            | 8.79%             | 2.60%            | 2.24%           | 2.05%           | 1.41%           | 0.18%           | 0.11%           | 0.11%           | 0.06%           |
|           | (12.83% - 15.26%) | (12.03% - 14.56%) | (10.58% - 12.86%) | (7.86% - 9.73%)   | (1.95% - 3.45%)  | (1.60% - 2.97%) | (1.46% - 2.71%) | (0.98% - 1.91%) | (0.03% - 0.41%) | (0.00% - 0.27%) | (0.00% - 0.29%) | (0.00% - 0.18%) |
| Mandera   | 22.26%            | 21.63%            | 20.71%            | 21.26%            | 5.24%            | 4.76%           | 4.24%           | 5.34%           | 0.68%           | 0.58%           | 0.46%           | 0.69%           |
|           | (20.79% - 23.70%) | (20.17% - 23.05%) | (19.25% - 22.06%) | (19.89% - 22.49%) | (4.02% - 6.42%)  | (3.66% - 5.87%) | (3.24% - 5.25%) | (4.22% - 6.50%) | (0.44% - 0.97%) | (0.38% - 0.82%) | (0.30% - 0.65%) | (0.48% - 1.01%) |
| Marsabit  | 20.08%            | 19.06%            | 20.93%            | 19.30%            | 6.33%            | 5.80%           | 7.22%           | 6.18%           | 1.09%           | 0.94%           | 1.45%           | 1.09%           |
|           | (18.75% - 21.30%) | (17.75% - 20.32%) | (19.76% - 22.13%) | (18.20% - 20.41%) | (5.17% - 7.52%)  | (4.69% - 6.94%) | (6.07% - 8.42%) | (5.12% - 7.14%) | (0.66% - 1.61%) | (0.55% - 1.40%) | (0.95% - 2.06%) | (0.69% - 1.51%) |
| Meru      | 19.17%            | 17.58%            | 14.02%            | 10.50%            | 6.42%            | 5.76%           | 3.58%           | 2.21%           | 1.28%           | 1.19%           | 0.46%           | 0.19%           |
|           | (18.08% - 20.27%) | (16.54% - 18.72%) | (12.93% - 15.14%) | (9.51% - 11.46%)  | (5.50% - 7.34%)  | (4.90% - 6.73%) | (2.88% - 4.30%) | (1.70% - 2.75%) | (0.91% - 1.72%) | (0.83% - 1.61%) | (0.26% - 0.70%) | (0.09% - 0.34%) |
| Migori    | 22.50%            | 19.34%            | 16.65%            | 12.99%            | 7.05%            | 5.48%           | 4.00%           | 2.85%           | 1.16%           | 0.75%           | 0.49%           | 0.28%           |
|           | (21.41% - 23.61%) | (18.21% - 20.47%) | (15.52% - 17.83%) | (12.09% - 13.99%) | (5.98% - 8.20%)  | (4.53% - 6.45%) | (3.19% - 4.79%) | (2.32% - 3.43%) | (0.75% - 1.66%) | (0.45% - 1.10%) | (0.26% - 0.78%) | (0.15% - 0.45%) |
| Mombasa   | 12.50%            | 11.61%            | 11.54%            | 9.42%             | 3.26%            | 3.01%           | 2.69%           | 2.02%           | 0.56%           | 0.52%           | 0.32%           | 0.19%           |
|           | (11.42% - 13.49%) | (10.69% - 12.54%) | (10.59% - 12.51%) | (8.52% - 10.32%)  | (2.71% - 3.90%)  | (2.52% - 3.61%) | (2.18% - 3.29%) | (1.61% - 2.47%) | (0.38% - 0.79%) | (0.35% - 0.74%) | (0.20% - 0.49%) | (0.11% - 0.32%) |
| Murang'a  | 16.11%            | 14.67%            | 11.09%            | 9.45%             | 4.41%            | 3.66%           | 2.28%           | 1.77%           | 0.61%           | 0.45%           | 0.17%           | 0.10%           |
|           | (15.05% - 17.16%) | (13.51% - 15.82%) | (9.94% - 12.24%)  | (8.42% - 10.42%)  | (3.59% - 5.32%)  | (2.84% - 4.50%) | (1.69% - 2.93%) | (1.31% - 2.28%) | (0.34% - 0.95%) | (0.21% - 0.74%) | (0.06% - 0.34%) | (0.03% - 0.20%) |
| Nairobi   | 11.11%            | 10.68%            | 9.10%             | 8.11%             | 2.71%            | 2.47%           | 1.88%           | 1.62%           | 0.26%           | 0.21%           | 0.10%           | 0.07%           |
|           | (10.40% - 11.84%) | (9.98% - 11.39%)  | (8.49% - 9.73%)   | (7.45% - 8.74%)   | (2.31% - 3.13%)  | (2.09% - 2.86%) | (1.59% - 2.21%) | (1.33% - 1.92%) | (0.16% - 0.39%) | (0.11% - 0.31%) | (0.04% - 0.18%) | (0.01% - 0.14%) |
| Nakuru    | 10.94%            | 10.56%            | 9.10%             | 7.36%             | 2.31%            | 1.99%           | 1.47%           | 1.12%           | 0.25%           | 0.15%           | 0.06%           | 0.02%           |
|           | (9.98% - 11.94%)  | (9.56% - 11.62%)  | (8.21% - 10.01%)  | (6.60% - 8.17%)   | (1.84% - 2.87%)  | (1.56% - 2.48%) | (1.10% - 1.87%) | (0.82% - 1.44%) | (0.13% - 0.42%) | (0.06% - 0.27%) | (0.01% - 0.12%) | (0.00% - 0.07%) |
| Nandi     | 17.99%            | 16.34%            | 13.05%            | 9.18%             | 5.11%            | 4.11%           | 2.58%           | 1.51%           | 0.84%           | 0.54%           | 0.21%           | 0.06%           |
|           | (16.76% - 19.22%) | (15.21% - 17.53%) | (11.91% - 14.32%) | (8.22% - 10.24%)  | (4.15% - 6.16%)  | (3.28% - 4.97%) | (1.95% - 3.32%) | (1.12% - 1.97%) | (0.55% - 1.20%) | (0.33% - 0.82%) | (0.11% - 0.36%) | (0.02% - 0.14%) |
| Narok     | 16.20%            | 15.95%            | 12.03%            | 9.08%             | 3.10%            | 3.49%           | 1.87%           | 1.15%           | 0.22%           | 0.33%           | 0.06%           | 0.01%           |
|           | (14.88% - 17.44%) | (14.70% - 17.30%) | (10.90% - 13.12%) | (8.08% - 10.20%)  | (2.20% - 4.06%)  | (2.53% - 4.49%) | (1.26% - 2.57%) | (0.75% - 1.63%) | (0.04% - 0.47%) | (0.10% - 0.65%) | (0.00% - 0.20%) | (0.00% - 0.07%) |
| Nyamira   | 19.20%            | 18.46%            | 16.30%            | 13.77%            | 5.71%            | 5.23%           | 4.09%           | 3.28%           | 0.97%           | 0.84%           | 0.61%           | 0.42%           |
|           | (18.00% - 20.47%) | (17.32% - 19.64%) | (15.08% - 17.49%) | (12.62% - 14.92%) | (4.71% - 6.73%)  | (4.32% - 6.13%) | (3.32% - 4.91%) | (2.62% - 4.04%) | (0.66% - 1.33%) | (0.56% - 1.15%) | (0.40% - 0.86%) | (0.25% - 0.64%) |
| Nyandarua | 12.95%            | 13.52%            | 12.56%            | 11.64%            | 3.76%            | 3.80%           | 3.33%           | 3.01%           | 0.81%           | 0.78%           | 0.64%           | 0.56%           |
|           | (12.02% - 13.94%) | (12.54% - 14.54%) | (11.50% - 13.63%) | (10.65% - 12.74%) | (3.10% - 4.51%)  | (3.14% - 4.60%) | (2.75% - 4.02%) | (2.48% - 3.62%) | (0.54% - 1.17%) | (0.52% - 1.11%) | (0.44% - 0.89%) | (0.38% - 0.78%) |
| Nyeri     | 10.99%            | 10.47%            | 9.73%             | 9.31%             | 2.30%            | 2.07%           | 1.86%           | 1.84%           | 0.24%           | 0.16%           | 0.11%           | 0.10%           |
|           | (9.96% - 12.09%)  | (9.46% - 11.54%)  | (8.70% - 10.67%)  | (8.32% - 10.27%)  | (1.79% - 2.85%)  | (1.61% - 2.59%) | (1.43% - 2.36%) | (1.42% - 2.33%) | (0.13% - 0.38%) | (0.08% - 0.26%) | (0.05% - 0.21%) | (0.04% - 0.20%) |
| Samburu   | 28.05%            | 26.64%            | 24.71%            | 21.20%            | 8.73%            | 7.91%           | 6.74%           | 5.26%           | 1.73%           | 1.47%           | 1.07%           | 0.66%           |
|           | (26.62% - 29.63%) | (25.09% - 28.33%) | (23.21% - 26.23%) | (19.81% - 22.57%) | (7.12% - 10.18%) | (6.22% - 9.51%) | (5.20% - 8.31%) | (4.12% - 6.49%) | (1.13% - 2.47%) | (0.91% - 2.18%) | (0.65% - 1.67%) | (0.36% - 1.05%) |
| Siaya     | 18.76%            | 17.62%            | 16.14%            | 12.61%            | 4.35%            | 3.94%           | 3.73%           | 2.80%           | 0.40%           | 0.33%           | 0.32%           | 0.21%           |
|           | (17.58% - 19.99%) | (16.45% - 18.86%) | (14.88% - 17.44%) | (11.47% - 13.71%) | (3.49% - 5.34%)  | (3.11% - 4.88%) | (2.84% - 4.67%) | (2.17% - 3.49%) | (0.20% - 0.68%) | (0.15% - 0.56%) | (0.12% - 0.59%) | (0.07% - 0.40%) |

Table S8c. Estimated overall, severe, and extreme **underweight** prevalence (%) in children under 5 years, both sexes, in 1990, 2000, 2010, and 2020.

| Location                           | Total                       |                             |                             |                             | Severe                      |                             |                             |                             | Extreme                  |                          |                          |                          |
|------------------------------------|-----------------------------|-----------------------------|-----------------------------|-----------------------------|-----------------------------|-----------------------------|-----------------------------|-----------------------------|--------------------------|--------------------------|--------------------------|--------------------------|
|                                    | 1990                        | 2000                        | 2010                        | 2020                        | 1990                        | 2000                        | 2010                        | 2020                        | 1990                     | 2000                     | 2010                     | 2020                     |
| <i>TaitaTaveta</i>                 | 20.55%<br>(19.33% - 21.87%) | 16.93%<br>(15.55% - 18.29%) | 12.50%<br>(11.21% - 13.82%) | 9.34%<br>(8.33% - 10.55%)   | 7.09%<br>(5.93% - 8.28%)    | 4.54%<br>(3.56% - 5.65%)    | 2.58%<br>(1.84% - 3.41%)    | 1.67%<br>(1.19% - 2.27%)    | 1.42%<br>(0.96% - 1.96%) | 0.58%<br>(0.31% - 0.94%) | 0.18%<br>(0.06% - 0.37%) | 0.08%<br>(0.02% - 0.21%) |
| <i>TanaRiver</i>                   | 17.60%<br>(16.32% - 18.93%) | 18.65%<br>(17.30% - 19.96%) | 18.13%<br>(16.73% - 19.45%) | 16.25%<br>(15.05% - 17.37%) | 4.21%<br>(3.24% - 5.28%)    | 4.39%<br>(3.27% - 5.59%)    | 4.39%<br>(3.21% - 5.57%)    | 4.26%<br>(3.40% - 5.14%)    | 0.48%<br>(0.23% - 0.83%) | 0.51%<br>(0.25% - 0.87%) | 0.56%<br>(0.33% - 0.87%) | 0.55%<br>(0.33% - 0.83%) |
| <i>TharakaNithi</i>                | 14.18%<br>(12.94% - 15.39%) | 13.88%<br>(12.71% - 15.06%) | 12.69%<br>(11.61% - 13.90%) | 9.91%<br>(9.05% - 10.91%)   | 2.96%<br>(2.36% - 3.60%)    | 2.75%<br>(2.22% - 3.40%)    | 2.60%<br>(2.06% - 3.20%)    | 1.92%<br>(1.52% - 2.38%)    | 0.35%<br>(0.21% - 0.53%) | 0.35%<br>(0.21% - 0.52%) | 0.30%<br>(0.19% - 0.45%) | 0.15%<br>(0.07% - 0.27%) |
| <i>TransNzoia</i>                  | 12.95%<br>(11.82% - 14.13%) | 12.22%<br>(11.13% - 13.35%) | 12.46%<br>(11.40% - 13.55%) | 10.55%<br>(9.56% - 11.55%)  | 2.19%<br>(1.66% - 2.79%)    | 2.16%<br>(1.69% - 2.72%)    | 2.49%<br>(2.00% - 3.03%)    | 2.02%<br>(1.61% - 2.49%)    | 0.12%<br>(0.03% - 0.25%) | 0.12%<br>(0.05% - 0.24%) | 0.23%<br>(0.13% - 0.35%) | 0.14%<br>(0.06% - 0.24%) |
| <i>Turkana</i>                     | 27.98%<br>(27.01% - 29.08%) | 26.22%<br>(25.10% - 27.31%) | 24.41%<br>(23.27% - 25.56%) | 22.39%<br>(21.29% - 23.52%) | 10.31%<br>(8.86% - 11.83%)  | 9.39%<br>(8.03% - 10.82%)   | 8.06%<br>(6.83% - 9.36%)    | 7.18%<br>(6.09% - 8.44%)    | 2.22%<br>(1.43% - 3.21%) | 1.94%<br>(1.24% - 2.75%) | 1.48%<br>(0.90% - 2.22%) | 1.24%<br>(0.77% - 1.86%) |
| <i>UasinGishu</i>                  | 14.81%<br>(13.69% - 15.99%) | 13.13%<br>(12.03% - 14.19%) | 11.28%<br>(10.35% - 12.27%) | 8.98%<br>(8.21% - 9.80%)    | 3.69%<br>(2.93% - 4.54%)    | 3.16%<br>(2.53% - 3.84%)    | 2.54%<br>(1.96% - 3.16%)    | 1.86%<br>(1.44% - 2.36%)    | 0.45%<br>(0.24% - 0.78%) | 0.38%<br>(0.19% - 0.61%) | 0.28%<br>(0.13% - 0.48%) | 0.16%<br>(0.06% - 0.31%) |
| <i>Vihiga</i>                      | 9.26%<br>(8.20% - 10.36%)   | 8.71%<br>(7.67% - 9.82%)    | 7.85%<br>(6.93% - 8.85%)    | 6.66%<br>(5.84% - 7.54%)    | 0.87%<br>(0.47% - 1.33%)    | 0.82%<br>(0.49% - 1.26%)    | 0.66%<br>(0.44% - 0.96%)    | 0.58%<br>(0.38% - 0.86%)    | 0.01%<br>(0.00% - 0.06%) | 0.01%<br>(0.00% - 0.05%) | 0.02%<br>(0.00% - 0.05%) | 0.01%<br>(0.00% - 0.03%) |
| <i>Wajir</i>                       | 24.55%<br>(23.37% - 25.73%) | 24.17%<br>(23.00% - 25.35%) | 21.14%<br>(19.80% - 22.42%) | 17.25%<br>(15.83% - 18.78%) | 6.02%<br>(4.80% - 7.27%)    | 5.63%<br>(4.37% - 6.78%)    | 3.98%<br>(2.82% - 5.12%)    | 1.98%<br>(1.24% - 2.85%)    | 0.62%<br>(0.27% - 1.10%) | 0.50%<br>(0.19% - 0.88%) | 0.24%<br>(0.05% - 0.53%) | 0.03%<br>(0.00% - 0.13%) |
| <i>WestPokot</i>                   | 30.38%<br>(29.38% - 31.52%) | 29.19%<br>(28.03% - 30.32%) | 27.80%<br>(26.74% - 28.82%) | 25.25%<br>(24.14% - 26.32%) | 11.90%<br>(10.40% - 13.51%) | 10.99%<br>(9.48% - 12.50%)  | 11.86%<br>(10.46% - 13.32%) | 10.43%<br>(9.14% - 11.77%)  | 2.90%<br>(2.03% - 4.00%) | 2.56%<br>(1.68% - 3.58%) | 3.29%<br>(2.42% - 4.36%) | 2.79%<br>(2.03% - 3.73%) |
| Madagascar                         | 28.78%<br>(28.14% - 29.46%) | 30.63%<br>(29.98% - 31.29%) | 29.60%<br>(28.84% - 30.36%) | 27.58%<br>(26.76% - 28.40%) | 12.90%<br>(12.00% - 13.93%) | 14.45%<br>(13.47% - 15.46%) | 13.56%<br>(12.43% - 14.77%) | 12.10%<br>(11.07% - 13.23%) | 3.83%<br>(3.24% - 4.55%) | 4.65%<br>(3.92% - 5.45%) | 4.18%<br>(3.37% - 5.08%) | 3.49%<br>(2.84% - 4.28%) |
| Malawi                             | 20.26%<br>(19.54% - 21.01%) | 17.92%<br>(17.23% - 18.54%) | 12.66%<br>(12.06% - 13.24%) | 10.52%<br>(9.88% - 11.16%)  | 6.15%<br>(5.48% - 6.81%)    | 4.98%<br>(4.47% - 5.47%)    | 2.67%<br>(2.36% - 2.98%)    | 1.95%<br>(1.65% - 2.24%)    | 0.97%<br>(0.74% - 1.20%) | 0.67%<br>(0.52% - 0.84%) | 0.17%<br>(0.11% - 0.24%) | 0.07%<br>(0.04% - 0.13%) |
| Mozambique                         | 23.08%<br>(22.28% - 23.89%) | 20.54%<br>(19.85% - 21.23%) | 14.97%<br>(14.32% - 15.62%) | 11.86%<br>(11.17% - 12.59%) | 8.05%<br>(7.30% - 8.92%)    | 6.60%<br>(6.00% - 7.23%)    | 3.67%<br>(3.26% - 4.10%)    | 2.57%<br>(2.22% - 2.95%)    | 1.61%<br>(1.27% - 1.99%) | 1.18%<br>(0.95% - 1.42%) | 0.41%<br>(0.30% - 0.54%) | 0.20%<br>(0.13% - 0.30%) |
| Rwanda                             | 20.95%<br>(20.40% - 21.57%) | 20.61%<br>(20.15% - 21.08%) | 12.88%<br>(12.44% - 13.31%) | 9.70%<br>(9.18% - 10.19%)   | 7.23%<br>(6.65% - 7.85%)    | 7.44%<br>(6.31% - 7.18%)    | 2.82%<br>(2.54% - 3.07%)    | 1.69%<br>(1.45% - 1.95%)    | 1.46%<br>(1.21% - 1.73%) | 1.24%<br>(1.06% - 1.42%) | 0.20%<br>(0.14% - 0.27%) | 0.04%<br>(0.02% - 0.08%) |
| Somalia                            | 25.18%<br>(24.32% - 25.99%) | 25.23%<br>(24.57% - 25.94%) | 25.03%<br>(24.29% - 25.76%) | 24.22%<br>(23.33% - 25.03%) | 10.13%<br>(9.15% - 11.14%)  | 10.78%<br>(9.91% - 11.66%)  | 9.86%<br>(8.96% - 10.77%)   | 9.18%<br>(8.18% - 10.19%)   | 2.52%<br>(1.97% - 3.14%) | 2.98%<br>(2.46% - 3.56%) | 2.38%<br>(1.89% - 2.92%) | 2.09%<br>(1.59% - 2.63%) |
| United Republic of Tanzania        | 24.18%<br>(23.63% - 24.74%) | 21.31%<br>(20.76% - 21.89%) | 15.10%<br>(14.54% - 15.65%) | 12.49%<br>(11.76% - 13.17%) | 8.70%<br>(8.08% - 9.34%)    | 6.60%<br>(6.05% - 7.20%)    | 3.33%<br>(2.96% - 3.69%)    | 2.54%<br>(2.19% - 2.93%)    | 1.80%<br>(1.50% - 2.11%) | 1.06%<br>(0.85% - 1.29%) | 0.25%<br>(0.16% - 0.34%) | 0.14%<br>(0.07% - 0.22%) |
| Uganda                             | 18.83%<br>(18.21% - 19.42%) | 18.08%<br>(17.51% - 18.64%) | 14.47%<br>(13.98% - 14.96%) | 11.44%<br>(10.85% - 12.07%) | 5.36%<br>(4.88% - 5.85%)    | 5.05%<br>(4.63% - 5.51%)    | 3.44%<br>(3.11% - 3.77%)    | 2.36%<br>(2.07% - 2.68%)    | 0.74%<br>(0.57% - 0.93%) | 0.72%<br>(0.57% - 0.87%) | 0.33%<br>(0.24% - 0.42%) | 0.15%<br>(0.09% - 0.22%) |
| Zambia                             | 19.06%<br>(18.40% - 19.68%) | 19.30%<br>(18.84% - 19.79%) | 15.20%<br>(14.65% - 15.75%) | 10.76%<br>(10.13% - 11.45%) | 5.75%<br>(5.20% - 6.31%)    | 5.82%<br>(5.38% - 6.28%)    | 3.82%<br>(3.45% - 4.25%)    | 2.34%<br>(2.01% - 2.71%)    | 0.91%<br>(0.70% - 1.13%) | 0.94%<br>(0.77% - 1.12%) | 0.41%<br>(0.30% - 0.53%) | 0.15%<br>(0.08% - 0.25%) |
| South Sudan                        | 27.06%<br>(26.22% - 27.89%) | 27.90%<br>(27.24% - 28.54%) | 25.92%<br>(25.33% - 26.52%) | 23.75%<br>(22.93% - 24.55%) | 11.71%<br>(10.69% - 12.77%) | 12.65%<br>(11.74% - 13.54%) | 11.40%<br>(10.72% - 12.13%) | 9.87%<br>(8.98% - 10.79%)   | 3.23%<br>(2.57% - 3.98%) | 3.74%<br>(3.11% - 4.41%) | 3.30%<br>(2.85% - 3.83%) | 2.65%<br>(2.10% - 3.27%) |
| <b>Southern Sub-Saharan Africa</b> | 10.35%<br>(10.17% - 10.55%) | 10.18%<br>(10.00% - 10.37%) | 8.98%<br>(8.84% - 9.13%)    | 7.26%<br>(7.11% - 7.44%)    | 2.18%<br>(2.09% - 2.28%)    | 2.12%<br>(2.03% - 2.21%)    | 1.64%<br>(1.56% - 1.71%)    | 1.14%<br>(1.07% - 1.21%)    | 0.17%<br>(0.15% - 0.19%) | 0.17%<br>(0.14% - 0.19%) | 0.09%<br>(0.08% - 0.10%) | 0.04%<br>(0.04% - 0.05%) |
| Botswana                           | 12.46%<br>(11.72% - 13.17%) | 11.50%<br>(10.99% - 11.99%) | 10.84%<br>(10.33% - 11.35%) | 9.37%<br>(8.77% - 10.01%)   | 2.37%<br>(2.02% - 2.76%)    | 2.19%<br>(1.94% - 2.47%)    | 2.21%<br>(1.95% - 2.48%)    | 1.86%<br>(1.59% - 2.18%)    | 0.11%<br>(0.07% - 0.18%) | 0.09%<br>(0.06% - 0.14%) | 0.13%<br>(0.08% - 0.18%) | 0.09%<br>(0.05% - 0.15%) |
| Lesotho                            | 15.75%<br>(15.07% - 16.44%) | 14.79%<br>(14.19% - 15.40%) | 13.39%<br>(12.76% - 14.04%) | 10.82%<br>(10.20% - 11.44%) | 4.50%<br>(4.02% - 5.01%)    | 3.93%<br>(3.50% - 4.36%)    | 2.93%<br>(2.58% - 3.34%)    | 2.06%<br>(1.75% - 2.40%)    | 0.65%<br>(0.50% - 0.82%) | 0.49%<br>(0.37% - 0.63%) | 0.23%<br>(0.14% - 0.33%) | 0.10%<br>(0.04% - 0.18%) |
| Namibia                            | 19.96%<br>(19.25% - 20.67%) | 18.27%<br>(17.61% - 18.94%) | 15.21%<br>(14.65% - 15.84%) | 12.53%<br>(11.84% - 13.23%) | 6.27%<br>(5.59% - 6.95%)    | 5.12%<br>(4.55% - 5.69%)    | 3.77%<br>(3.34% - 4.23%)    | 2.90%<br>(2.45% - 3.37%)    | 1.04%<br>(0.77% - 1.32%) | 0.68%<br>(0.49% - 0.89%) | 0.38%<br>(0.25% - 0.53%) | 0.24%<br>(0.13% - 0.38%) |
| South Africa                       | 9.81%<br>(9.57% - 10.06%)   | 9.06%<br>(8.85% - 9.27%)    | 7.31%<br>(7.14% - 7.49%)    | 5.98%<br>(5.83% - 6.14%)    | 2.02%<br>(1.91% - 2.14%)    | 1.79%<br>(1.69% - 1.88%)    | 1.25%<br>(1.19% - 1.32%)    | 0.90%<br>(0.85% - 0.96%)    | 0.16%<br>(0.13% - 0.18%) | 0.14%<br>(0.12% - 0.15%) | 0.07%<br>(0.06% - 0.08%) | 0.04%<br>(0.03% - 0.05%) |

**Table S8c. Estimated overall, severe, and extreme underweight prevalence (%) in children under 5 years, both sexes, in 1990, 2000, 2010, and 2020.**

| Location                          | Total                       |                             |                             |                             | Severe                      |                             |                             |                             | Extreme                  |                          |                          |                          |
|-----------------------------------|-----------------------------|-----------------------------|-----------------------------|-----------------------------|-----------------------------|-----------------------------|-----------------------------|-----------------------------|--------------------------|--------------------------|--------------------------|--------------------------|
|                                   | 1990                        | 2000                        | 2010                        | 2020                        | 1990                        | 2000                        | 2010                        | 2020                        | 1990                     | 2000                     | 2010                     | 2020                     |
| Eswatini                          | 7.97%<br>(7.46% - 8.56%)    | 7.93%<br>(7.44% - 8.46%)    | 6.60%<br>(6.19% - 7.02%)    | 5.54%<br>(5.15% - 5.94%)    | 1.17%<br>(0.99% - 1.36%)    | 1.21%<br>(1.05% - 1.41%)    | 0.87%<br>(0.76% - 1.00%)    | 0.71%<br>(0.60% - 0.83%)    | 0.02%<br>(0.00% - 0.04%) | 0.02%<br>(0.01% - 0.04%) | 0.01%<br>(0.00% - 0.02%) | 0.00%<br>(0.00% - 0.01%) |
| Zimbabwe                          | 9.76%<br>(9.32% - 10.21%)   | 11.47%<br>(11.03% - 11.95%) | 11.81%<br>(11.46% - 12.17%) | 9.02%<br>(8.55% - 9.53%)    | 2.15%<br>(1.61% - 2.00%)    | 2.43%<br>(2.17% - 2.71%)    | 1.31%<br>(1.95% - 2.36%)    | 1.31%<br>(1.12% - 1.53%)    | 0.05%<br>(0.03% - 0.08%) | 0.15%<br>(0.09% - 0.22%) | 0.09%<br>(0.05% - 0.13%) | 0.02%<br>(0.01% - 0.05%) |
| <b>Western Sub-Saharan Africa</b> | 24.43%<br>(24.19% - 24.70%) | 24.27%<br>(24.02% - 24.53%) | 22.13%<br>(21.95% - 22.33%) | 19.85%<br>(19.62% - 20.10%) | 10.33%<br>(9.96% - 10.70%)  | 10.34%<br>(9.97% - 10.68%)  | 9.08%<br>(8.83% - 9.33%)    | 7.72%<br>(7.44% - 8.00%)    | 3.24%<br>(2.94% - 3.56%) | 3.30%<br>(3.00% - 3.62%) | 2.75%<br>(2.54% - 2.98%) | 2.19%<br>(1.97% - 2.41%) |
| Benin                             | 22.55%<br>(21.97% - 23.11%) | 21.27%<br>(20.64% - 21.92%) | 18.64%<br>(18.08% - 19.23%) | 16.47%<br>(15.79% - 17.15%) | 8.41%<br>(7.78% - 9.00%)    | 7.06%<br>(6.49% - 7.63%)    | 5.62%<br>(5.17% - 6.09%)    | 4.46%<br>(3.96% - 4.99%)    | 1.85%<br>(1.56% - 2.18%) | 1.29%<br>(1.05% - 1.55%) | 0.85%<br>(0.69% - 1.04%) | 0.55%<br>(0.40% - 0.73%) |
| Burkina Faso                      | 30.08%<br>(29.39% - 30.78%) | 31.82%<br>(31.21% - 32.42%) | 26.89%<br>(26.33% - 27.45%) | 23.01%<br>(22.28% - 23.77%) | 13.80%<br>(12.87% - 14.74%) | 16.60%<br>(15.71% - 17.47%) | 11.90%<br>(11.26% - 12.55%) | 8.70%<br>(7.98% - 9.44%)    | 4.19%<br>(3.51% - 4.94%) | 6.29%<br>(5.53% - 7.13%) | 3.47%<br>(3.05% - 3.94%) | 1.97%<br>(1.60% - 2.39%) |
| Cameroon                          | 15.88%<br>(15.17% - 16.58%) | 16.50%<br>(15.85% - 17.14%) | 14.77%<br>(14.21% - 15.36%) | 12.65%<br>(11.96% - 13.33%) | 4.39%<br>(3.89% - 4.91%)    | 5.02%<br>(4.57% - 5.51%)    | 4.23%<br>(3.84% - 4.66%)    | 3.43%<br>(3.02% - 3.89%)    | 0.57%<br>(0.42% - 0.74%) | 0.81%<br>(0.64% - 1.00%) | 0.60%<br>(0.46% - 0.75%) | 0.42%<br>(0.30% - 0.57%) |
| Cabo Verde                        | 13.34%<br>(12.67% - 14.01%) | 11.23%<br>(10.53% - 11.91%) | 8.41%<br>(7.84% - 9.04%)    | 7.09%<br>(6.54% - 7.68%)    | 3.65%<br>(3.25% - 4.10%)    | 2.81%<br>(2.40% - 3.22%)    | 1.85%<br>(1.57% - 2.16%)    | 1.47%<br>(1.23% - 1.74%)    | 0.45%<br>(0.34% - 0.59%) | 0.28%<br>(0.18% - 0.39%) | 0.10%<br>(0.04% - 0.17%) | 0.05%<br>(0.02% - 0.10%) |
| Chad                              | 28.89%<br>(28.20% - 29.59%) | 29.24%<br>(28.62% - 29.88%) | 28.16%<br>(27.48% - 28.79%) | 26.09%<br>(25.34% - 26.83%) | 13.61%<br>(12.62% - 14.74%) | 14.06%<br>(13.23% - 14.95%) | 13.34%<br>(12.47% - 14.26%) | 11.65%<br>(10.68% - 12.66%) | 4.40%<br>(3.65% - 5.37%) | 4.70%<br>(4.02% - 5.47%) | 4.35%<br>(3.70% - 5.16%) | 3.47%<br>(2.76% - 4.23%) |
| Côte d'Ivoire                     | 14.98%<br>(14.47% - 15.52%) | 16.25%<br>(15.81% - 16.71%) | 15.39%<br>(14.98% - 15.80%) | 12.28%<br>(11.75% - 12.78%) | 3.71%<br>(3.35% - 4.08%)    | 4.49%<br>(4.13% - 4.86%)    | 4.12%<br>(3.81% - 4.44%)    | 2.74%<br>(2.45% - 3.05%)    | 0.38%<br>(0.28% - 0.48%) | 0.58%<br>(0.46% - 0.70%) | 0.49%<br>(0.39% - 0.61%) | 0.20%<br>(0.13% - 0.27%) |
| Gambia                            | 19.38%<br>(18.53% - 20.27%) | 18.02%<br>(17.33% - 18.74%) | 16.97%<br>(16.35% - 17.61%) | 14.74%<br>(14.05% - 15.49%) | 5.35%<br>(4.68% - 6.07%)    | 4.79%<br>(4.23% - 5.34%)    | 4.61%<br>(4.12% - 5.10%)    | 3.54%<br>(3.08% - 4.07%)    | 0.72%<br>(0.51% - 0.95%) | 0.59%<br>(0.43% - 0.76%) | 0.60%<br>(0.44% - 0.76%) | 0.34%<br>(0.22% - 0.50%) |
| Ghana                             | 22.41%<br>(21.74% - 23.13%) | 19.86%<br>(19.21% - 20.48%) | 15.84%<br>(15.22% - 16.50%) | 12.26%<br>(11.57% - 12.96%) | 7.58%<br>(6.93% - 8.30%)    | 5.92%<br>(5.33% - 6.54%)    | 4.07%<br>(3.63% - 4.52%)    | 2.76%<br>(2.38% - 3.17%)    | 1.40%<br>(1.12% - 1.72%) | 0.89%<br>(0.69% - 1.11%) | 0.45%<br>(0.33% - 0.59%) | 0.21%<br>(0.13% - 0.31%) |
| Guinea                            | 21.12%<br>(20.46% - 21.77%) | 22.29%<br>(21.85% - 22.76%) | 19.58%<br>(19.16% - 20.00%) | 16.58%<br>(15.97% - 17.20%) | 7.02%<br>(6.42% - 7.65%)    | 8.06%<br>(7.56% - 8.52%)    | 6.11%<br>(5.69% - 6.55%)    | 4.58%<br>(4.12% - 5.07%)    | 1.28%<br>(1.05% - 1.54%) | 1.73%<br>(1.49% - 1.97%) | 1.01%<br>(0.84% - 1.19%) | 0.61%<br>(0.47% - 0.78%) |
| Guinea-Bissau                     | 20.22%<br>(19.34% - 21.08%) | 19.46%<br>(18.81% - 20.10%) | 17.45%<br>(16.91% - 17.98%) | 15.75%<br>(14.98% - 16.48%) | 5.81%<br>(5.04% - 6.55%)    | 5.63%<br>(5.06% - 6.17%)    | 4.83%<br>(4.39% - 5.28%)    | 4.11%<br>(3.57% - 4.68%)    | 0.81%<br>(0.59% - 1.06%) | 0.81%<br>(0.62% - 1.00%) | 0.62%<br>(0.48% - 0.77%) | 0.47%<br>(0.32% - 0.65%) |
| Liberia                           | 20.79%<br>(19.92% - 21.67%) | 21.41%<br>(20.75% - 22.14%) | 16.74%<br>(16.17% - 17.35%) | 13.92%<br>(13.21% - 14.71%) | 5.76%<br>(5.01% - 6.63%)    | 6.48%<br>(5.83% - 7.16%)    | 4.42%<br>(3.98% - 4.86%)    | 3.39%<br>(2.94% - 3.87%)    | 0.73%<br>(0.51% - 1.02%) | 0.98%<br>(0.75% - 1.25%) | 0.53%<br>(0.39% - 0.67%) | 0.33%<br>(0.22% - 0.47%) |
| Mali                              | 28.52%<br>(27.80% - 29.22%) | 26.76%<br>(26.09% - 27.35%) | 21.41%<br>(20.77% - 22.04%) | 19.33%<br>(18.59% - 20.07%) | 14.38%<br>(13.49% - 15.35%) | 12.47%<br>(11.68% - 13.30%) | 7.53%<br>(6.93% - 8.16%)    | 6.21%<br>(5.59% - 6.86%)    | 5.23%<br>(4.52% - 6.07%) | 4.03%<br>(3.47% - 4.64%) | 1.53%<br>(1.25% - 1.84%) | 1.08%<br>(0.84% - 1.35%) |
| Mauritania                        | 28.69%<br>(28.02% - 29.35%) | 24.25%<br>(23.61% - 24.87%) | 20.00%<br>(19.43% - 20.57%) | 16.91%<br>(16.19% - 17.64%) | 13.58%<br>(12.66% - 14.51%) | 10.13%<br>(9.40% - 10.89%)  | 7.36%<br>(6.79% - 7.92%)    | 5.54%<br>(4.96% - 6.14%)    | 4.39%<br>(3.70% - 5.20%) | 2.73%<br>(2.28% - 3.22%) | 1.64%<br>(1.38% - 1.92%) | 1.03%<br>(0.81% - 1.28%) |
| Niger                             | 36.48%<br>(35.72% - 37.38%) | 36.51%<br>(35.81% - 37.27%) | 33.12%<br>(32.39% - 33.88%) | 30.85%<br>(30.06% - 31.65%) | 19.52%<br>(18.27% - 20.76%) | 19.66%<br>(18.38% - 20.90%) | 15.92%<br>(14.86% - 17.01%) | 13.58%<br>(12.50% - 14.70%) | 7.44%<br>(6.17% - 8.75%) | 7.65%<br>(6.35% - 8.96%) | 5.13%<br>(4.28% - 6.06%) | 3.82%<br>(3.10% - 4.66%) |
| Nigeria                           | 25.61%<br>(25.08% - 26.14%) | 25.23%<br>(24.76% - 25.77%) | 23.76%<br>(23.41% - 24.10%) | 21.65%<br>(21.18% - 22.13%) | 11.59%<br>(10.87% - 12.38%) | 11.37%<br>(10.65% - 12.09%) | 10.86%<br>(10.37% - 11.33%) | 9.59%<br>(9.02% - 10.16%)   | 4.13%<br>(3.49% - 4.81%) | 4.00%<br>(3.41% - 4.63%) | 3.87%<br>(3.45% - 4.30%) | 3.28%<br>(2.84% - 3.74%) |
| Sao Tome and Principe             | 12.63%<br>(11.94% - 13.36%) | 10.87%<br>(10.27% - 11.48%) | 10.50%<br>(9.93% - 11.06%)  | 8.46%<br>(7.89% - 9.04%)    | 2.63%<br>(2.28% - 3.02%)    | 2.02%<br>(1.76% - 2.31%)    | 2.09%<br>(1.83% - 2.37%)    | 1.56%<br>(1.34% - 1.80%)    | 0.18%<br>(0.12% - 0.26%) | 0.12%<br>(0.08% - 0.16%) | 0.13%<br>(0.08% - 0.18%) | 0.08%<br>(0.04% - 0.11%) |
| Senegal                           | 20.29%<br>(19.65% - 20.92%) | 18.95%<br>(18.41% - 19.51%) | 16.10%<br>(15.66% - 16.57%) | 13.25%<br>(12.67% - 13.88%) | 5.82%<br>(5.24% - 6.45%)    | 4.91%<br>(4.41% - 5.41%)    | 3.56%<br>(3.20% - 3.94%)    | 2.69%<br>(2.32% - 3.05%)    | 0.78%<br>(0.57% - 1.01%) | 0.53%<br>(0.39% - 0.69%) | 0.26%<br>(0.18% - 0.37%) | 0.15%<br>(0.08% - 0.24%) |
| Sierra Leone                      | 23.14%<br>(22.48% - 23.81%) | 23.32%<br>(22.65% - 23.98%) | 20.25%<br>(19.71% - 20.85%) | 15.39%<br>(14.70% - 16.11%) | 8.87%<br>(8.15% - 9.58%)    | 9.03%<br>(8.34% - 9.74%)    | 6.80%<br>(6.31% - 7.32%)    | 4.31%<br>(3.85% - 4.79%)    | 2.11%<br>(1.76% - 2.47%) | 2.22%<br>(1.87% - 2.60%) | 1.32%<br>(1.10% - 1.56%) | 0.62%<br>(0.47% - 0.78%) |

**Fig. S1. Standardized betas for ST–GPR stage 1 priors by sex for all covariates included in ensemble priors by ST-GPR model for stunting, wasting, and underweight.** Histograms are shown for overall (A), severe (B), and mean (C) stunting; for overall (D), severe (E), and mean (F) wasting; and for overall (G), severe (H), and mean (I) underweight models. Note that because of a transformation to mean Z–score models, those relationships are in the opposite direction.

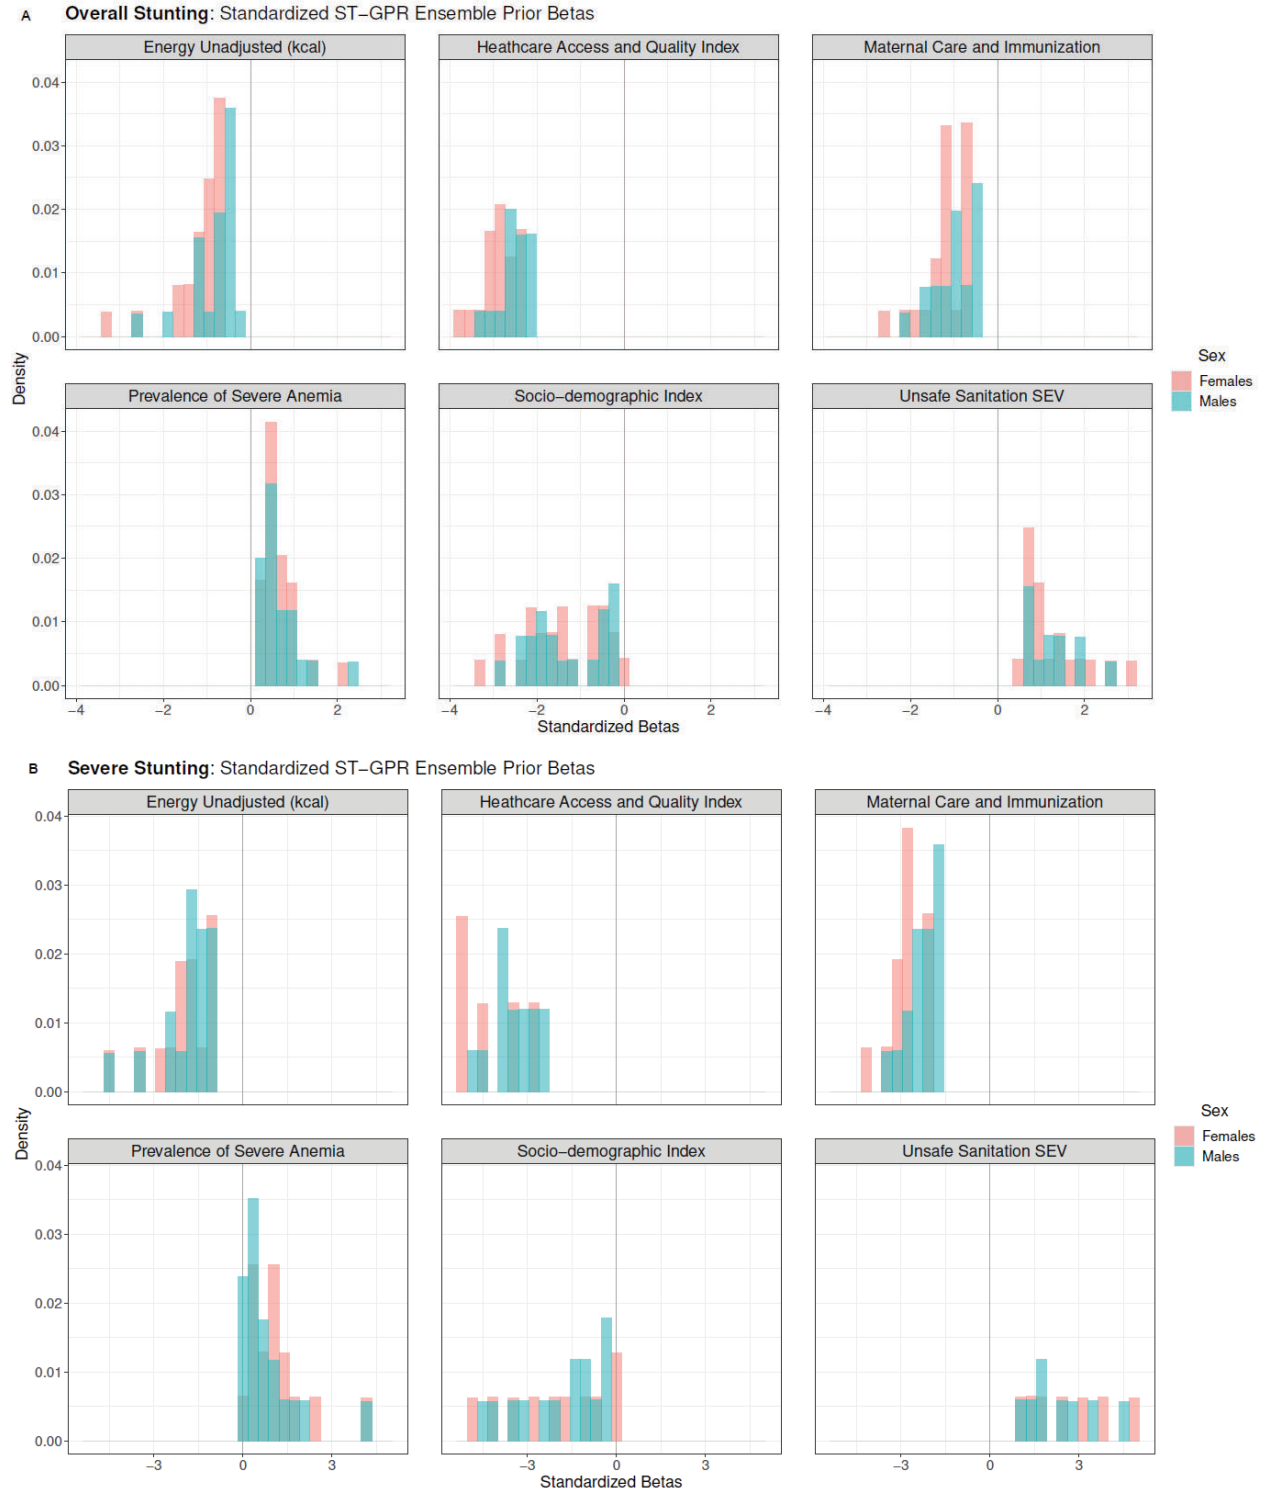



**c Mean Stunting: Standardized ST-GPR Ensemble Prior Betas**

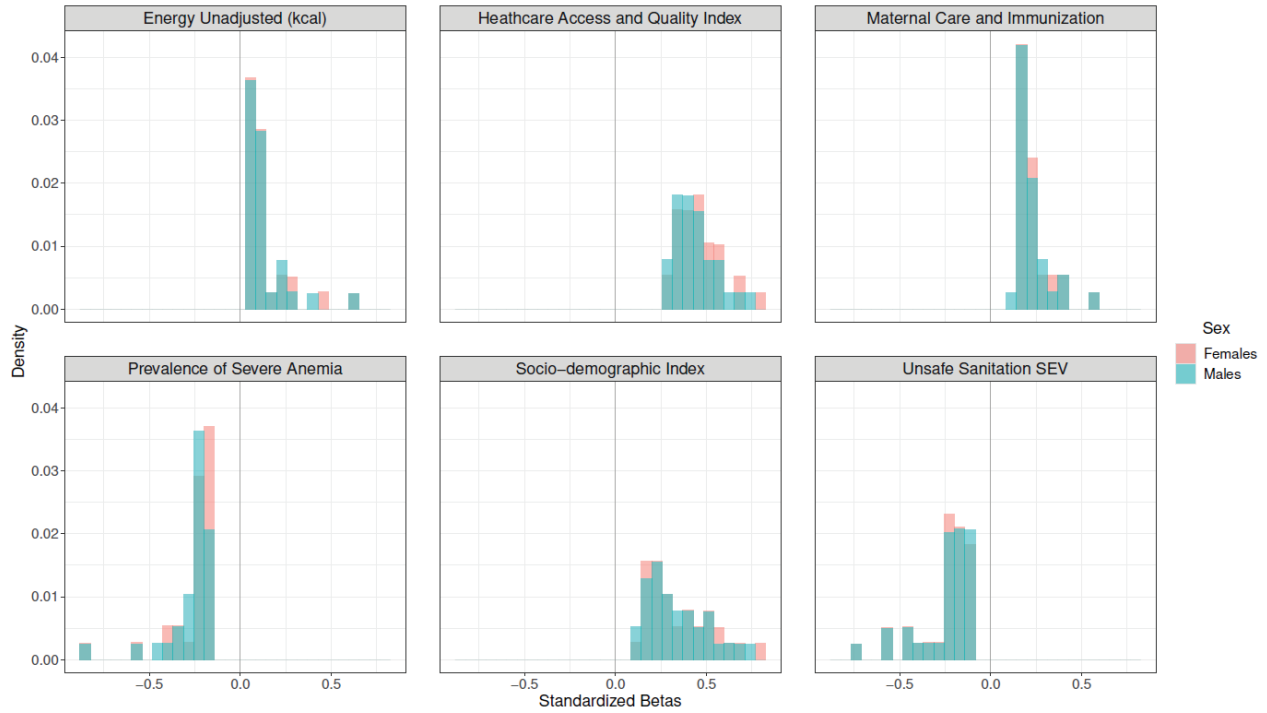

**d Overall Wasting: Standardized ST-GPR Ensemble Prior Betas**

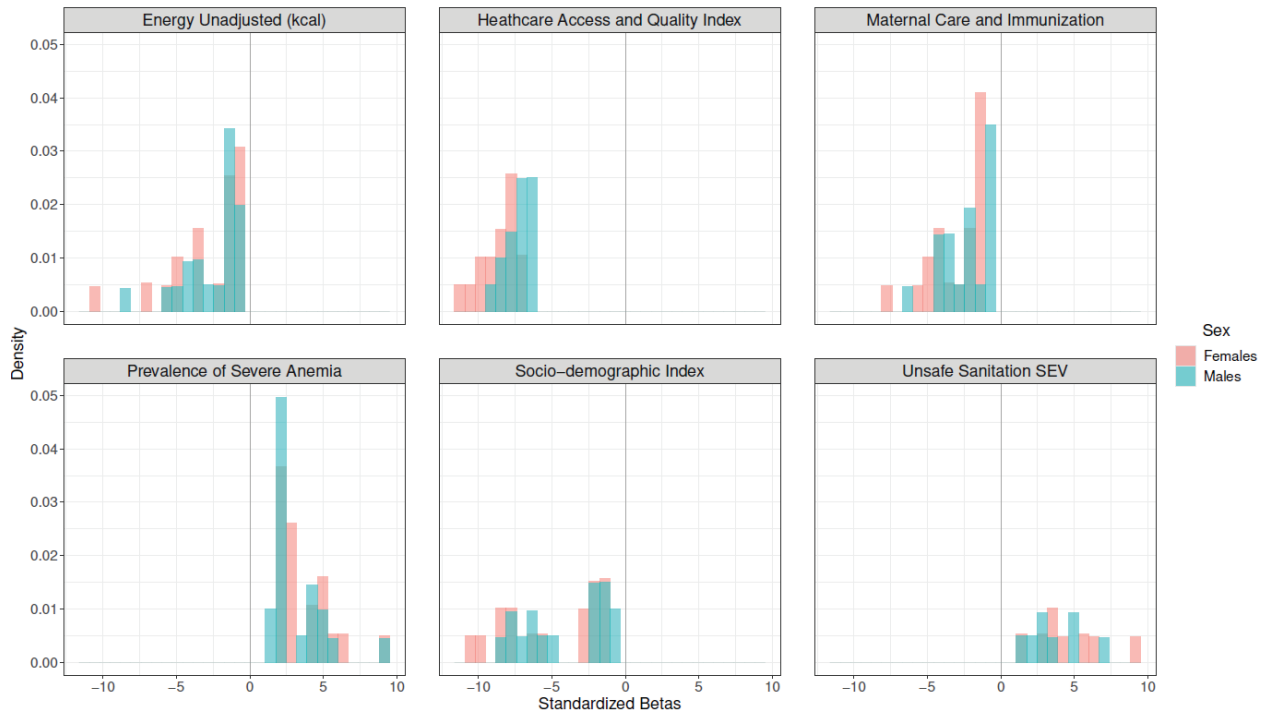

**E Severe Wasting: Standardized ST-GPR Ensemble Prior Betas**

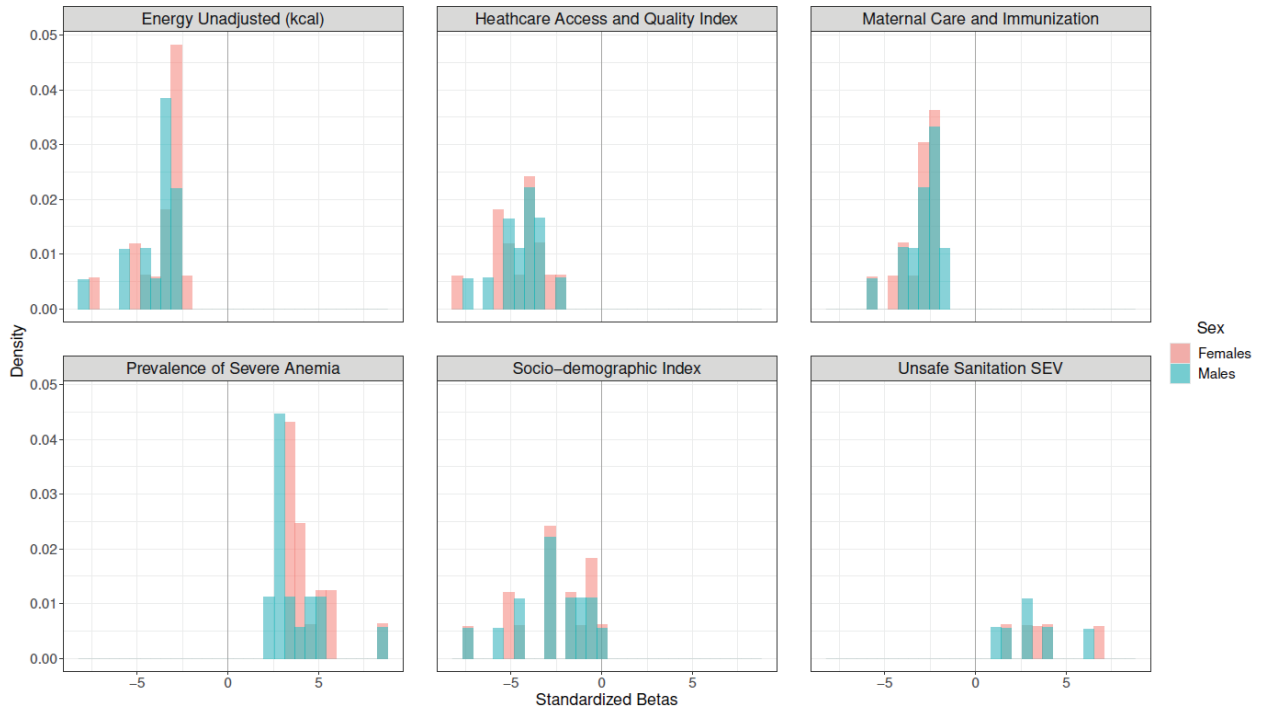

**F Mean Wasting: Standardized ST-GPR Ensemble Prior Betas**

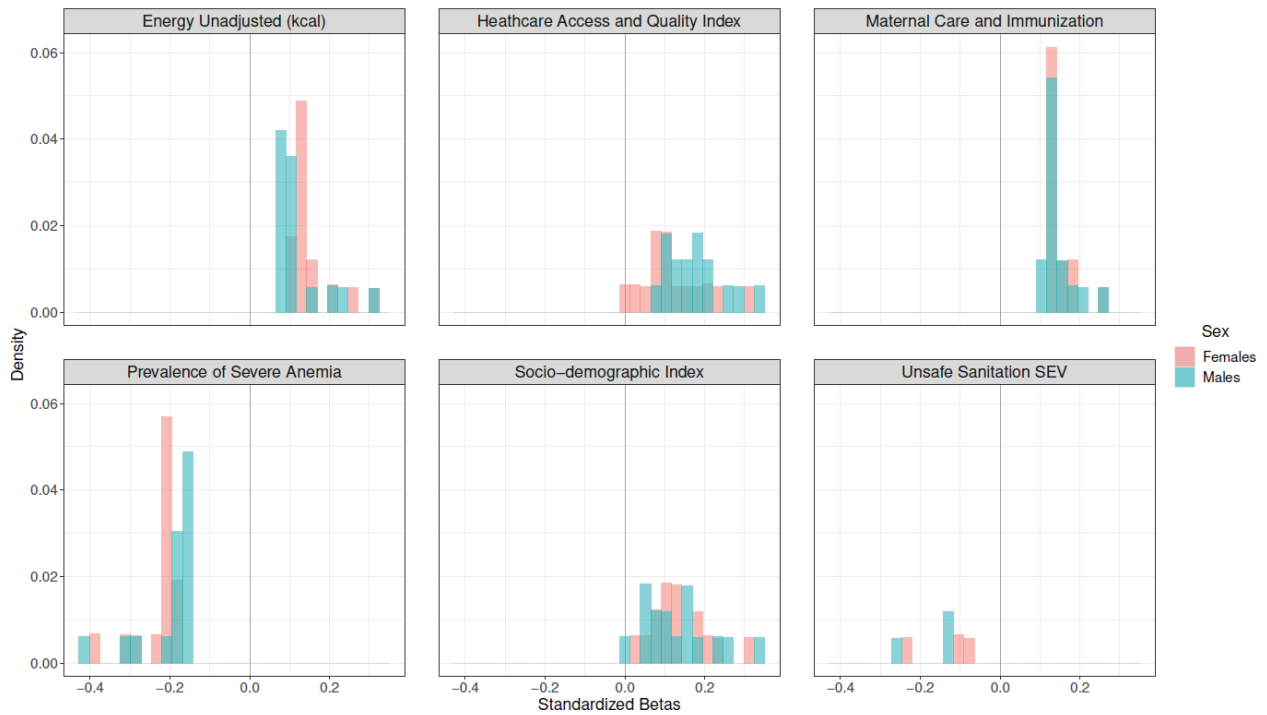

**G Overall Underweight: Standardized ST-GPR Ensemble Prior Betas**

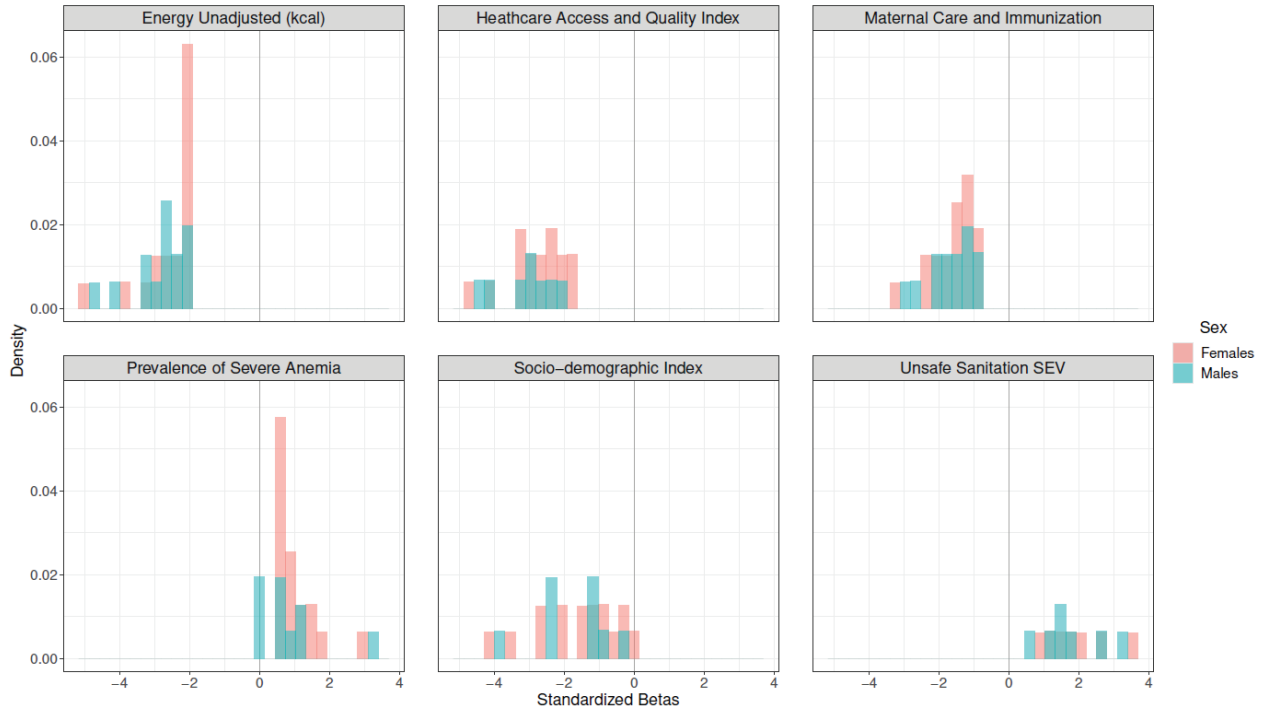

**H Severe Underweight: Standardized ST-GPR Ensemble Prior Betas**

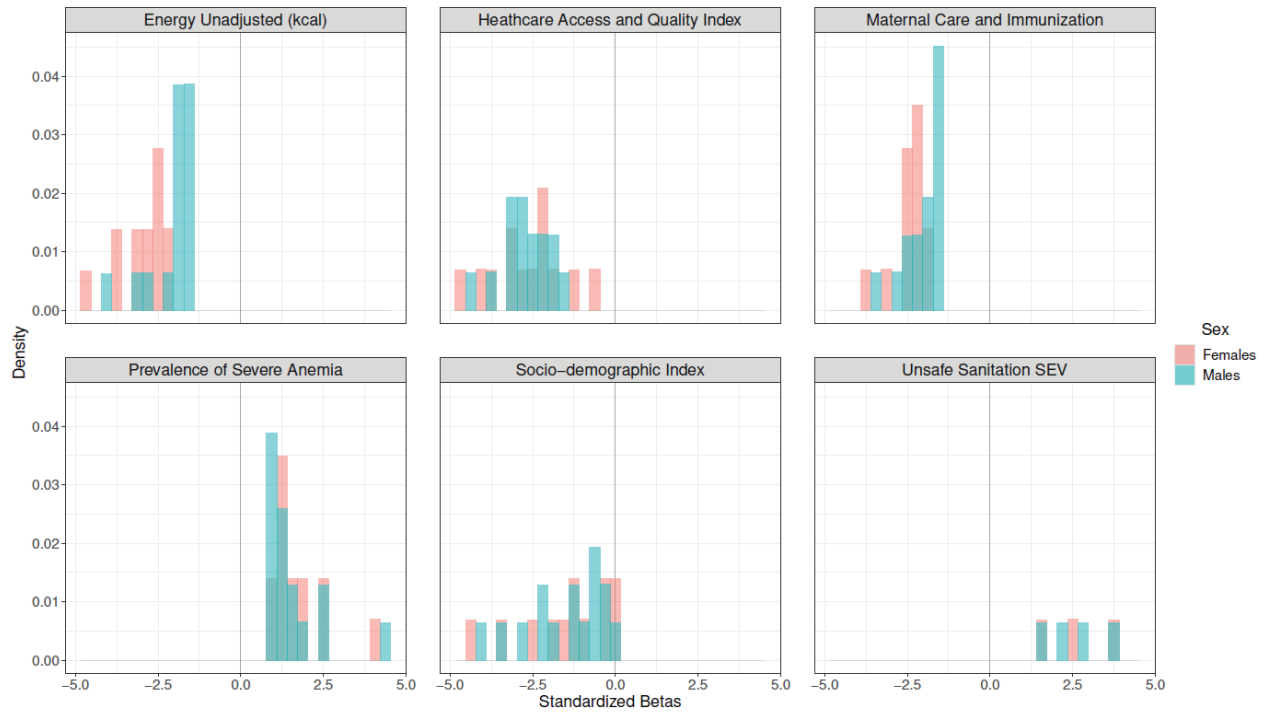

I Mean Underweight: Standardized ST-GPR Ensemble Prior Betas

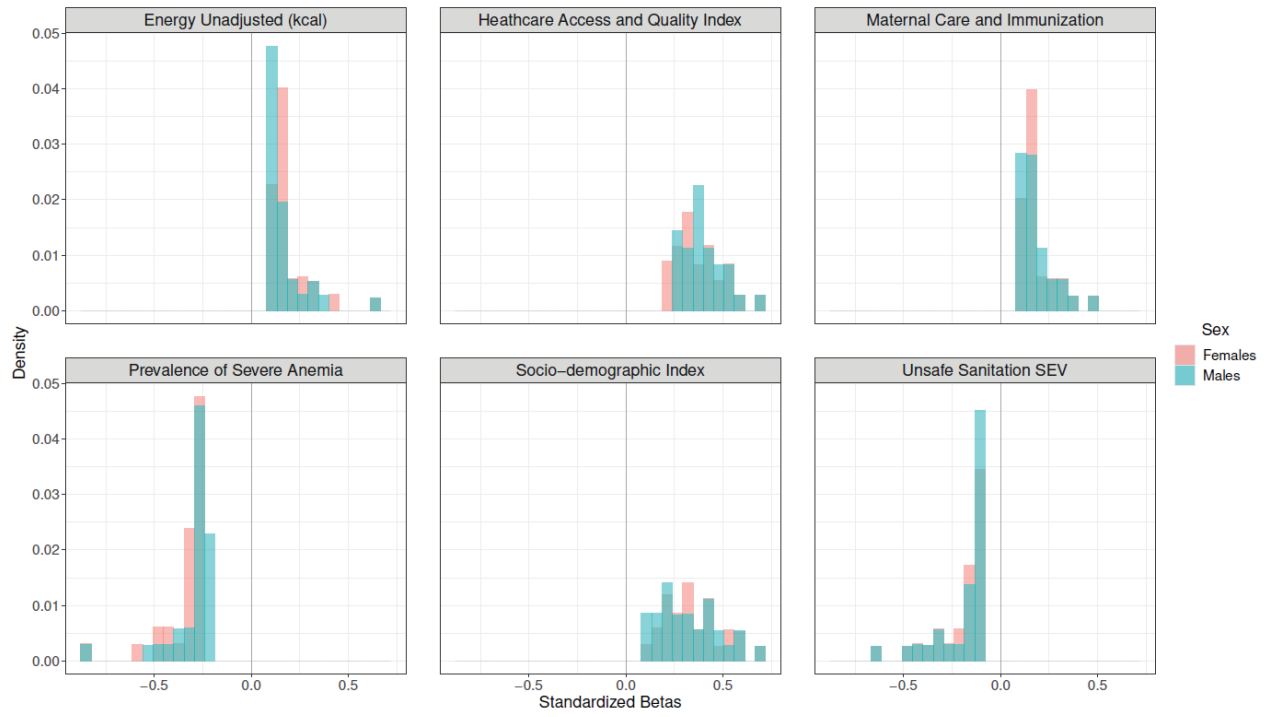

**Fig. S2. Map of source counts for GBD 2020 for stunting, wasting, and underweight.** Map of source counts for GBD 2020 for stunting [HAZ] (A), wasting [WHZ] (B), and underweight [WAZ] (C).

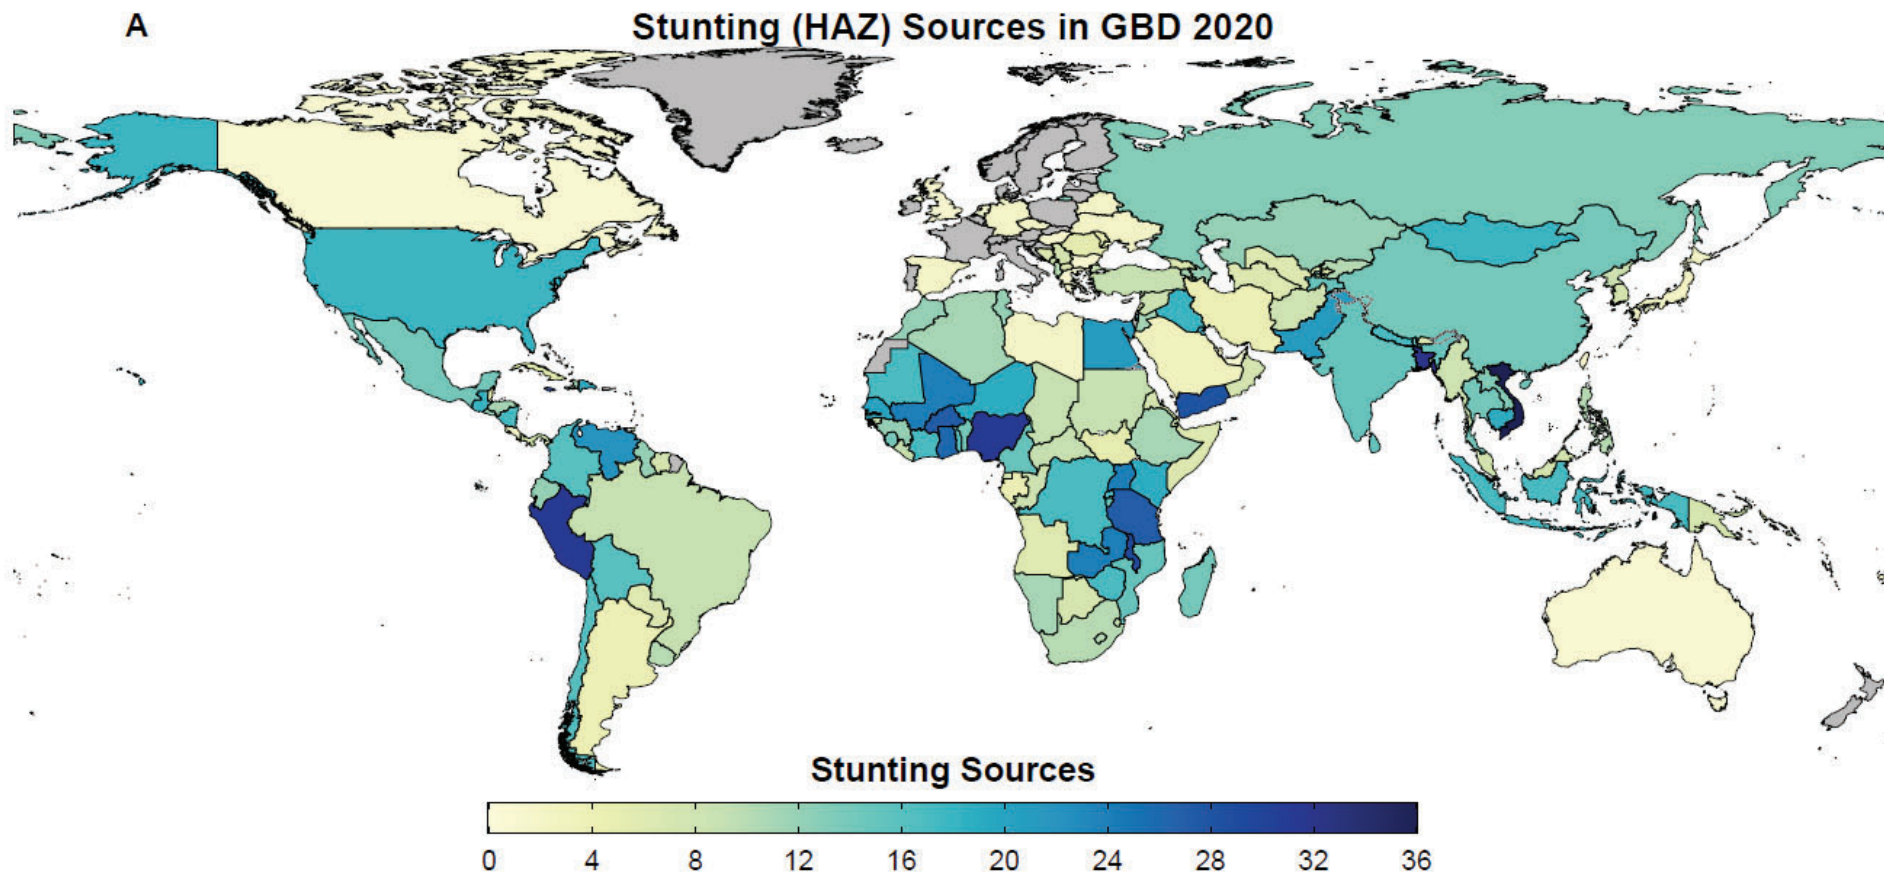

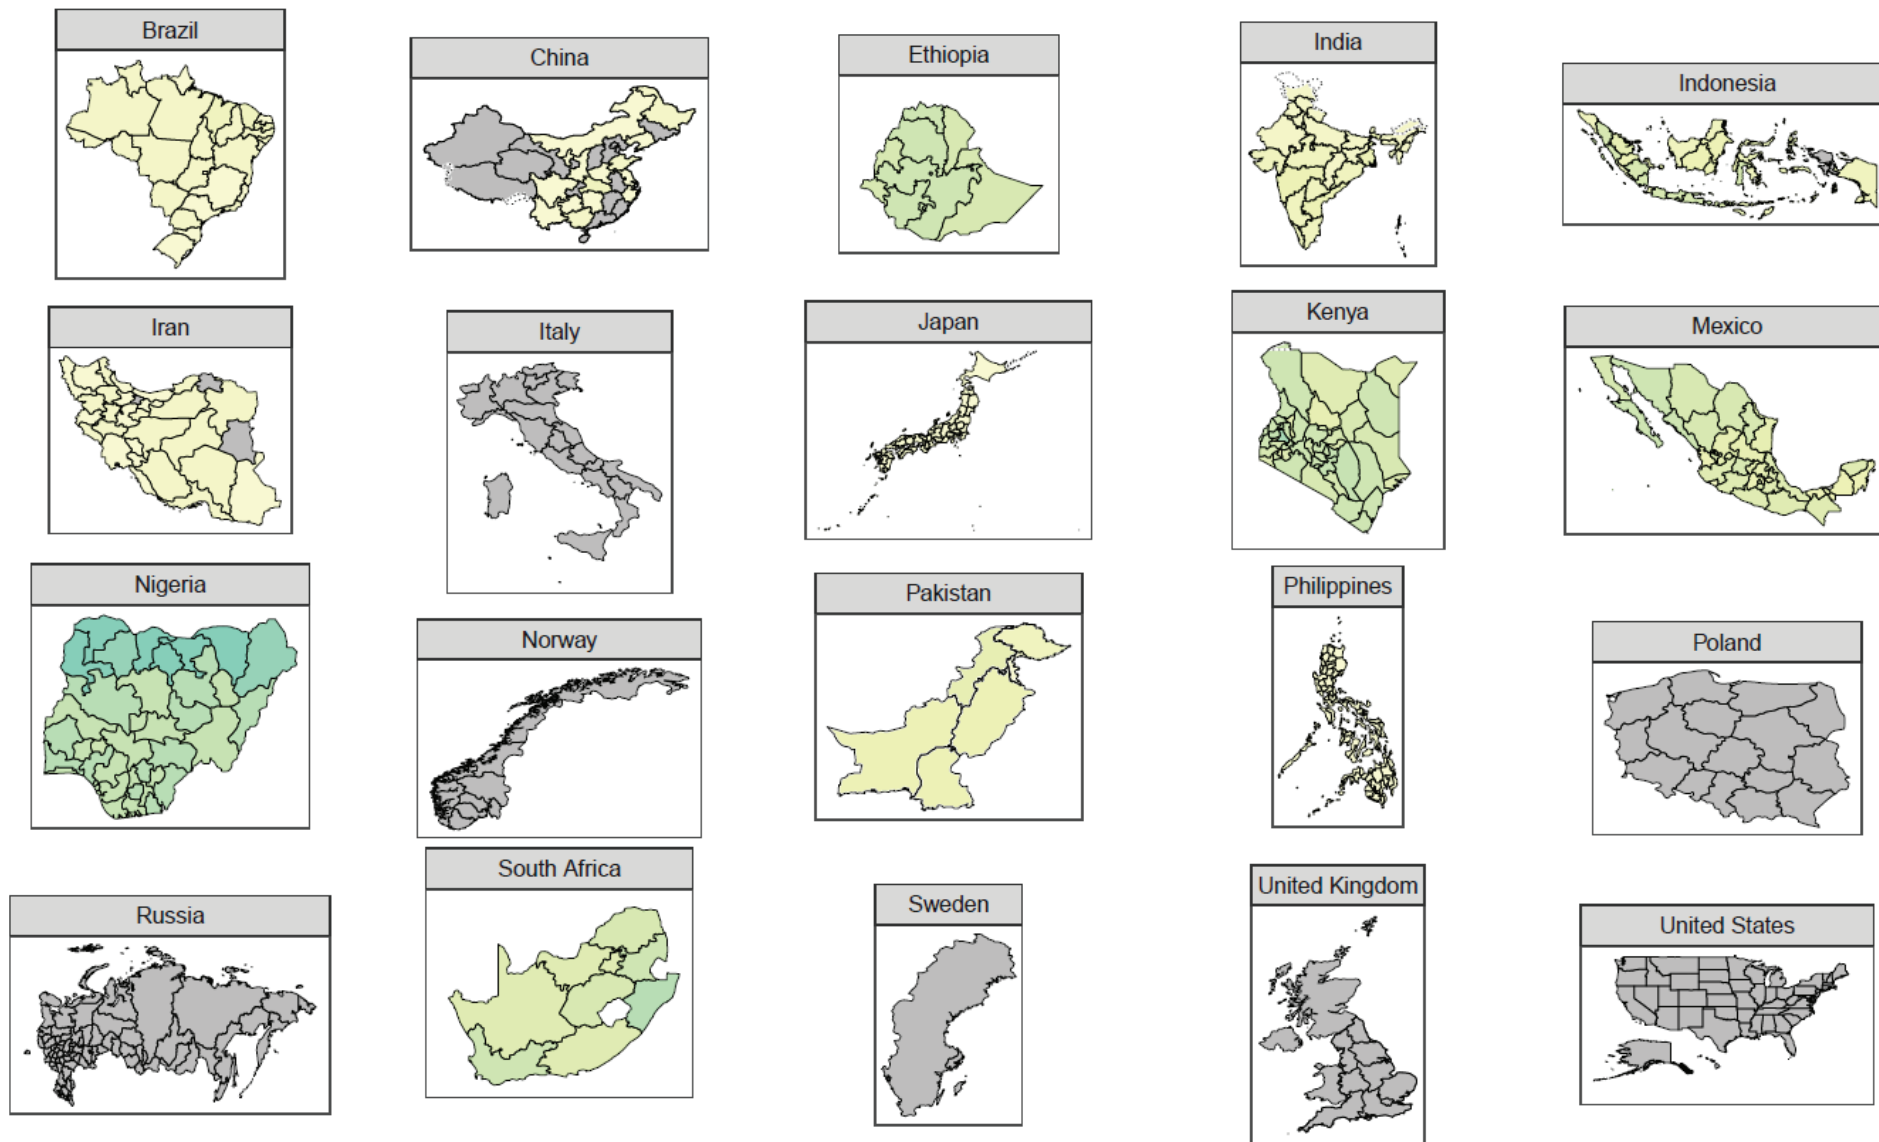

**Stunting Sources**

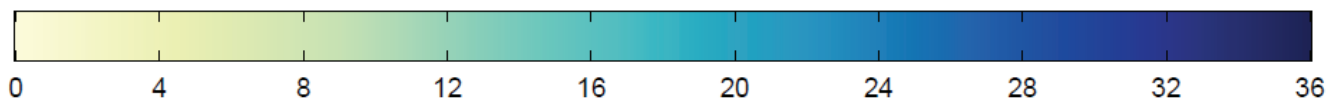

B

### Wasting (WHZ) Sources in GBD 2020

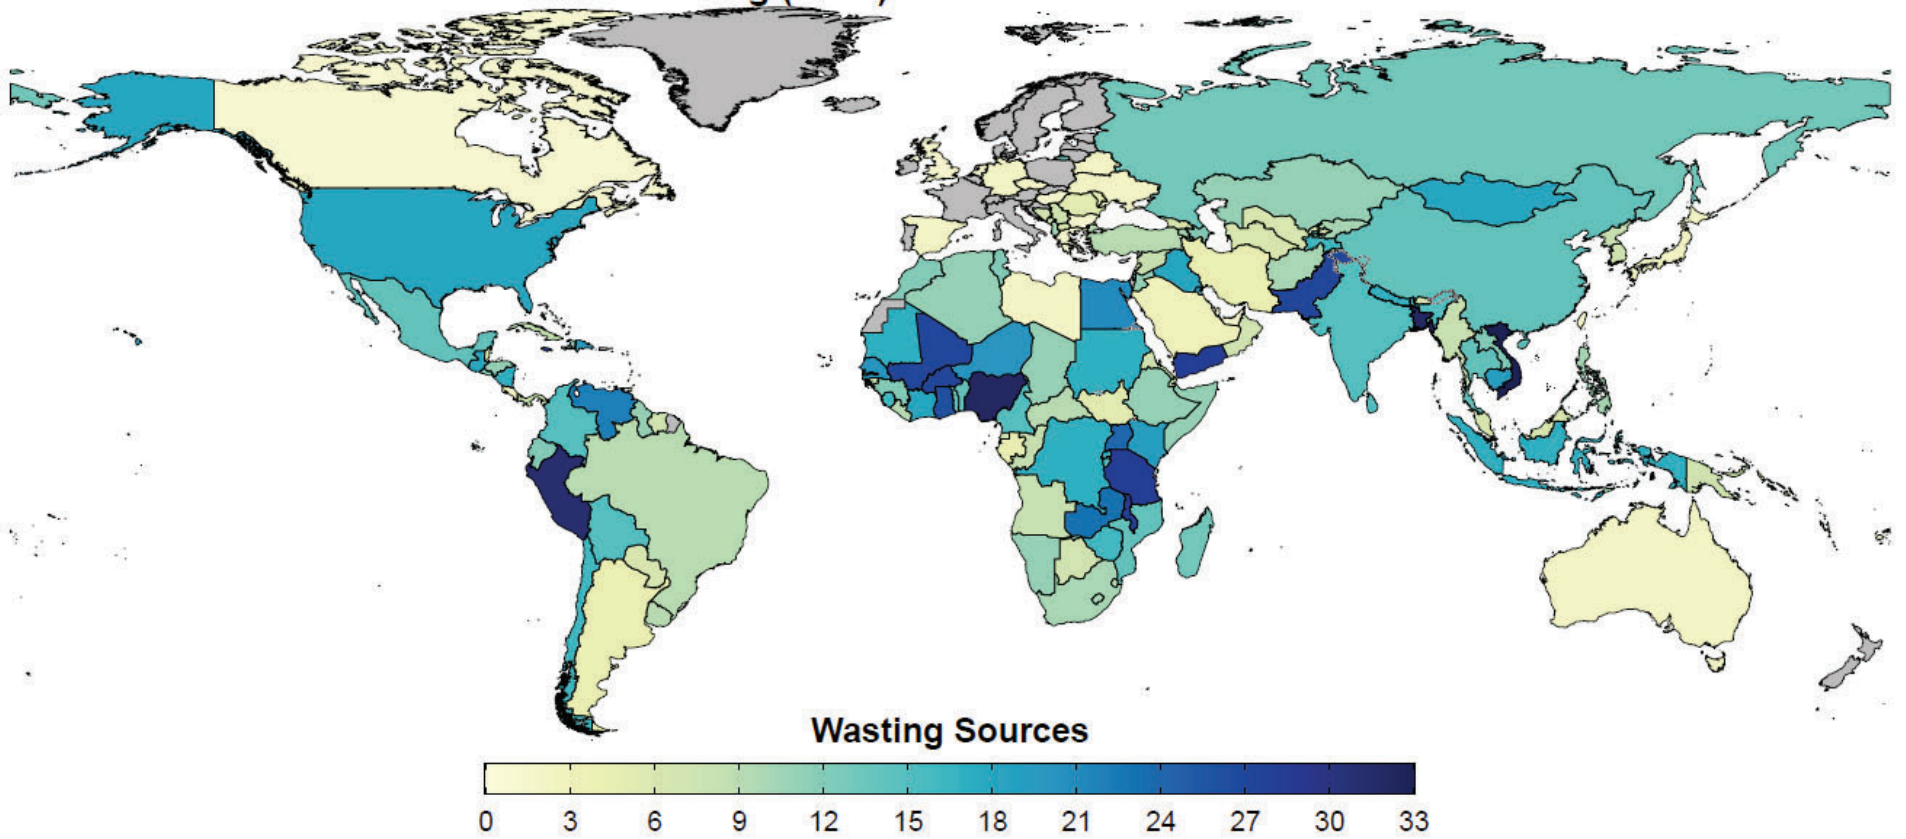

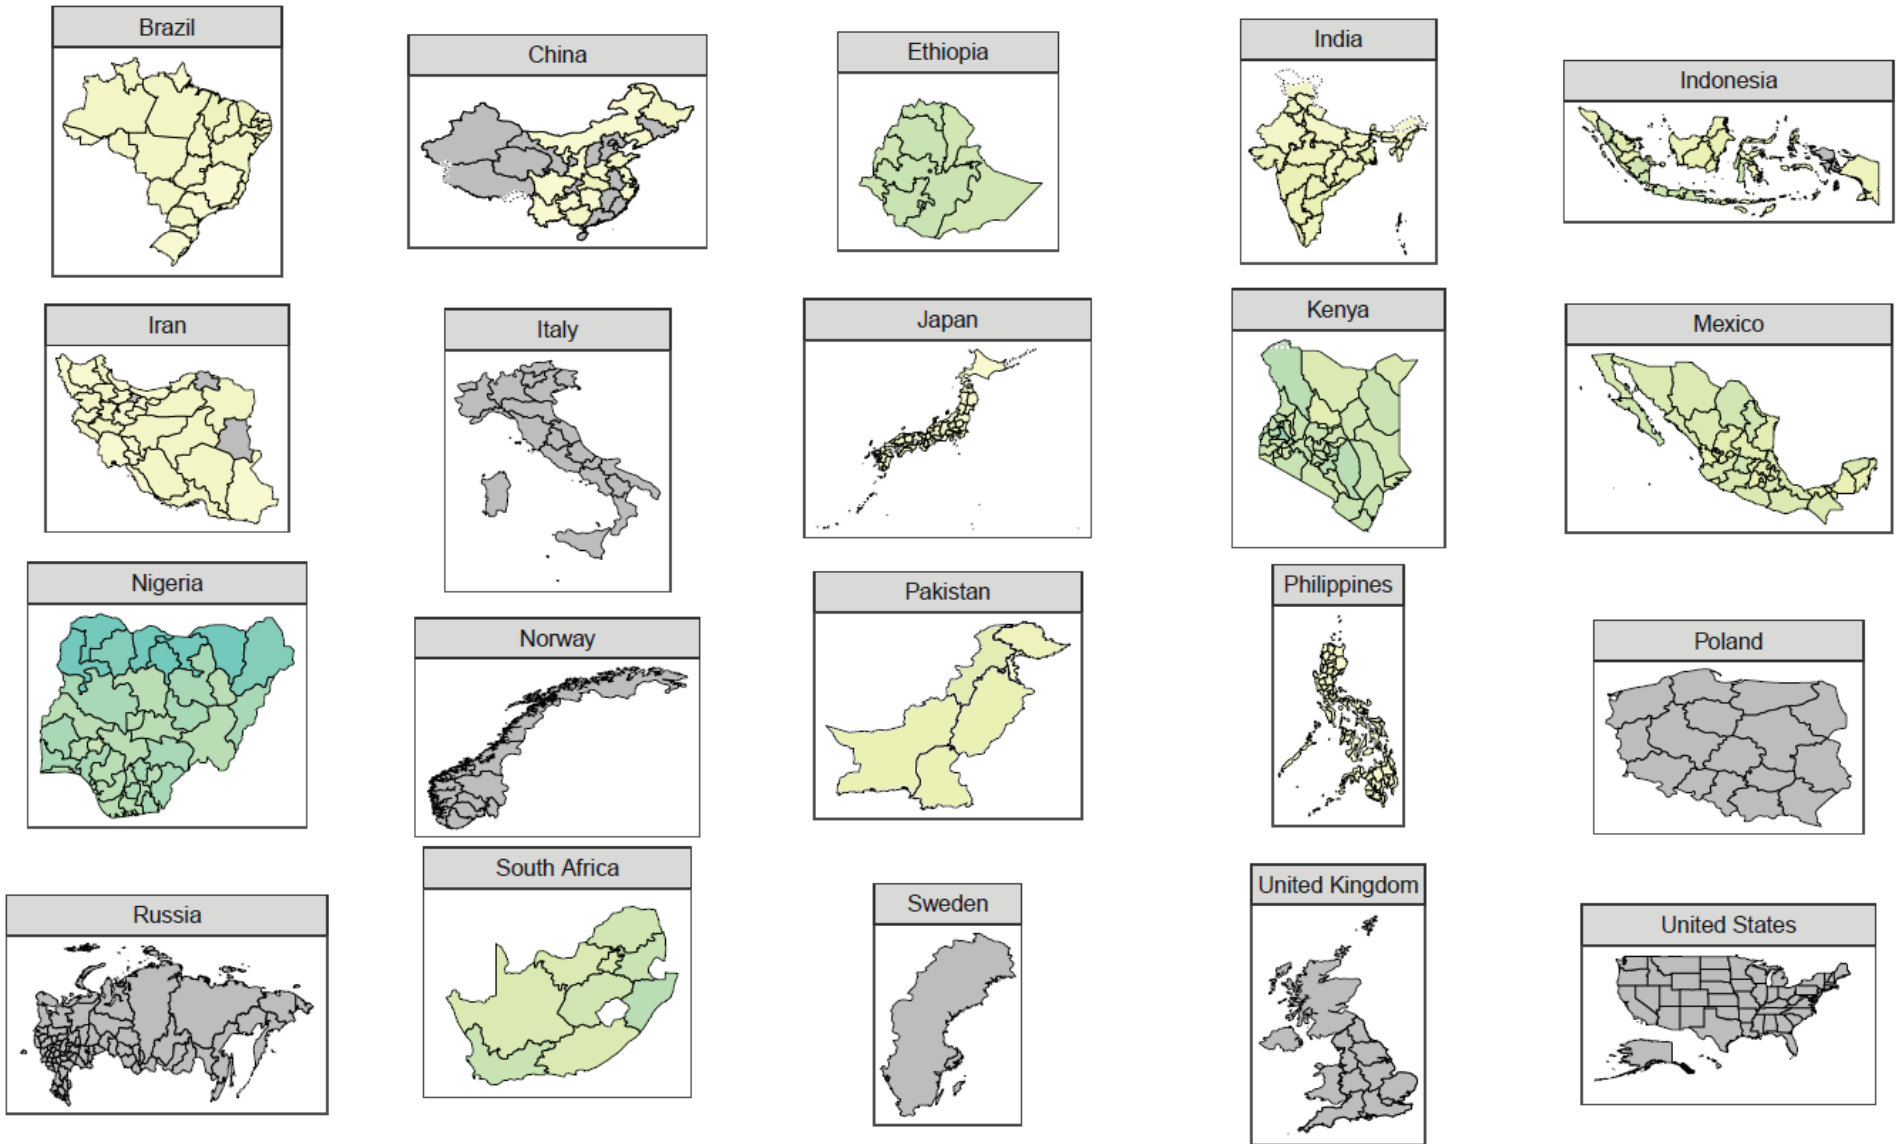

**Wasting Sources**

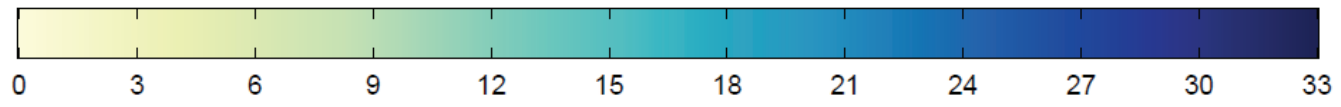



C

### Underweight (WAZ) Sources in GBD 2020

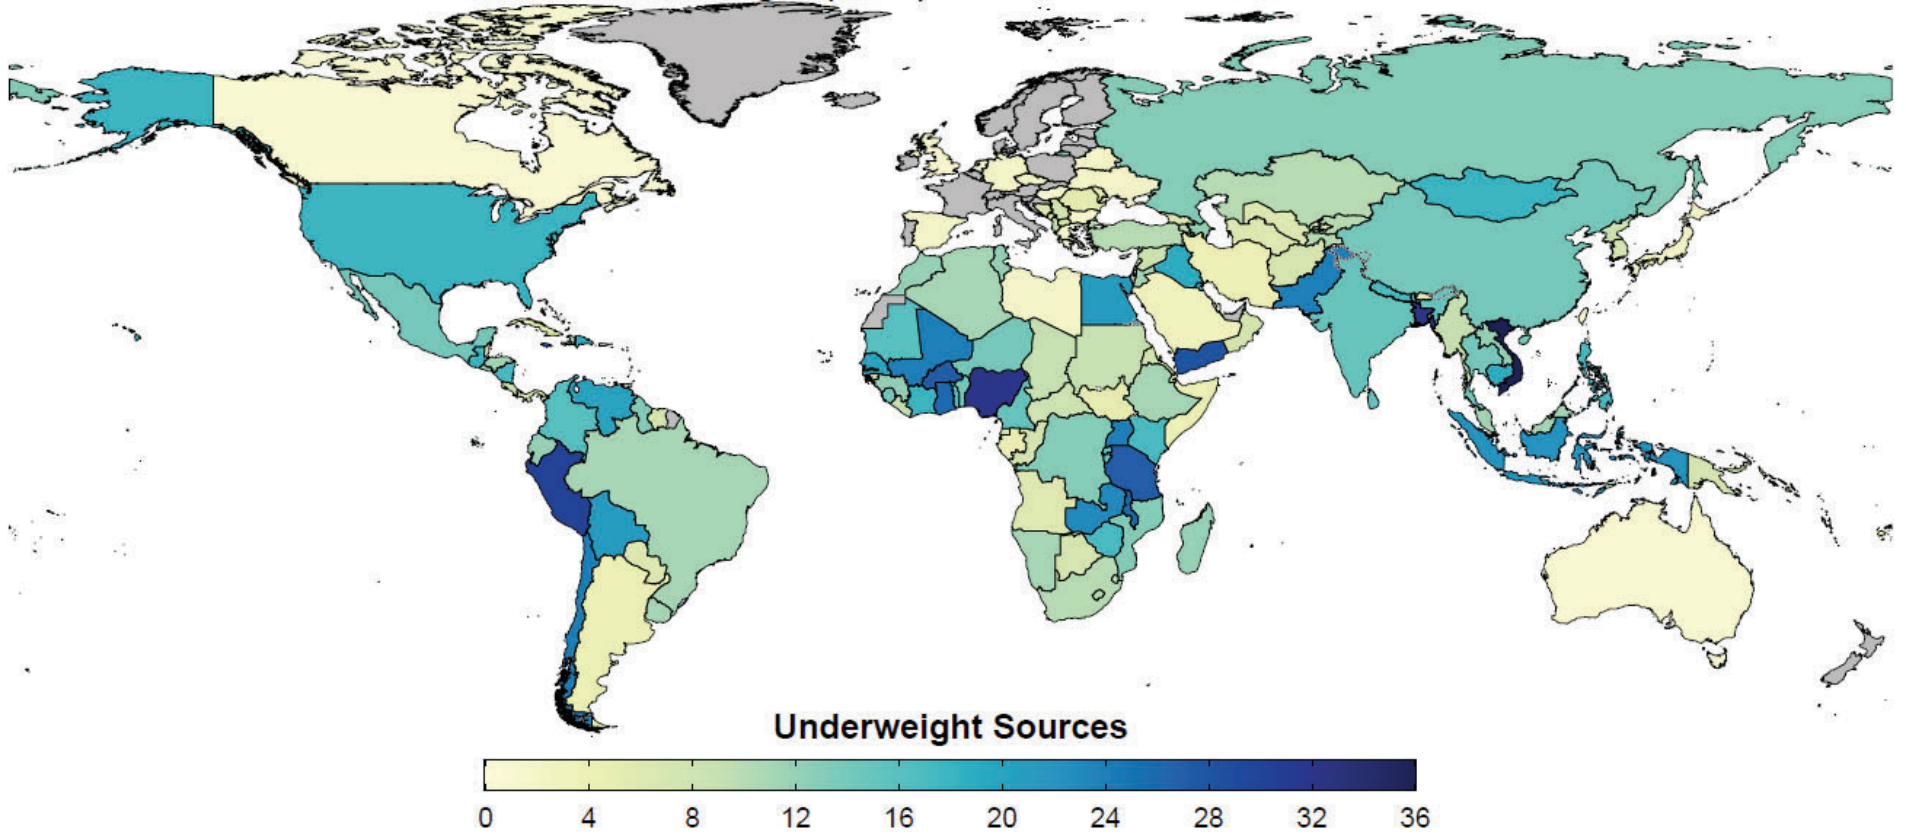

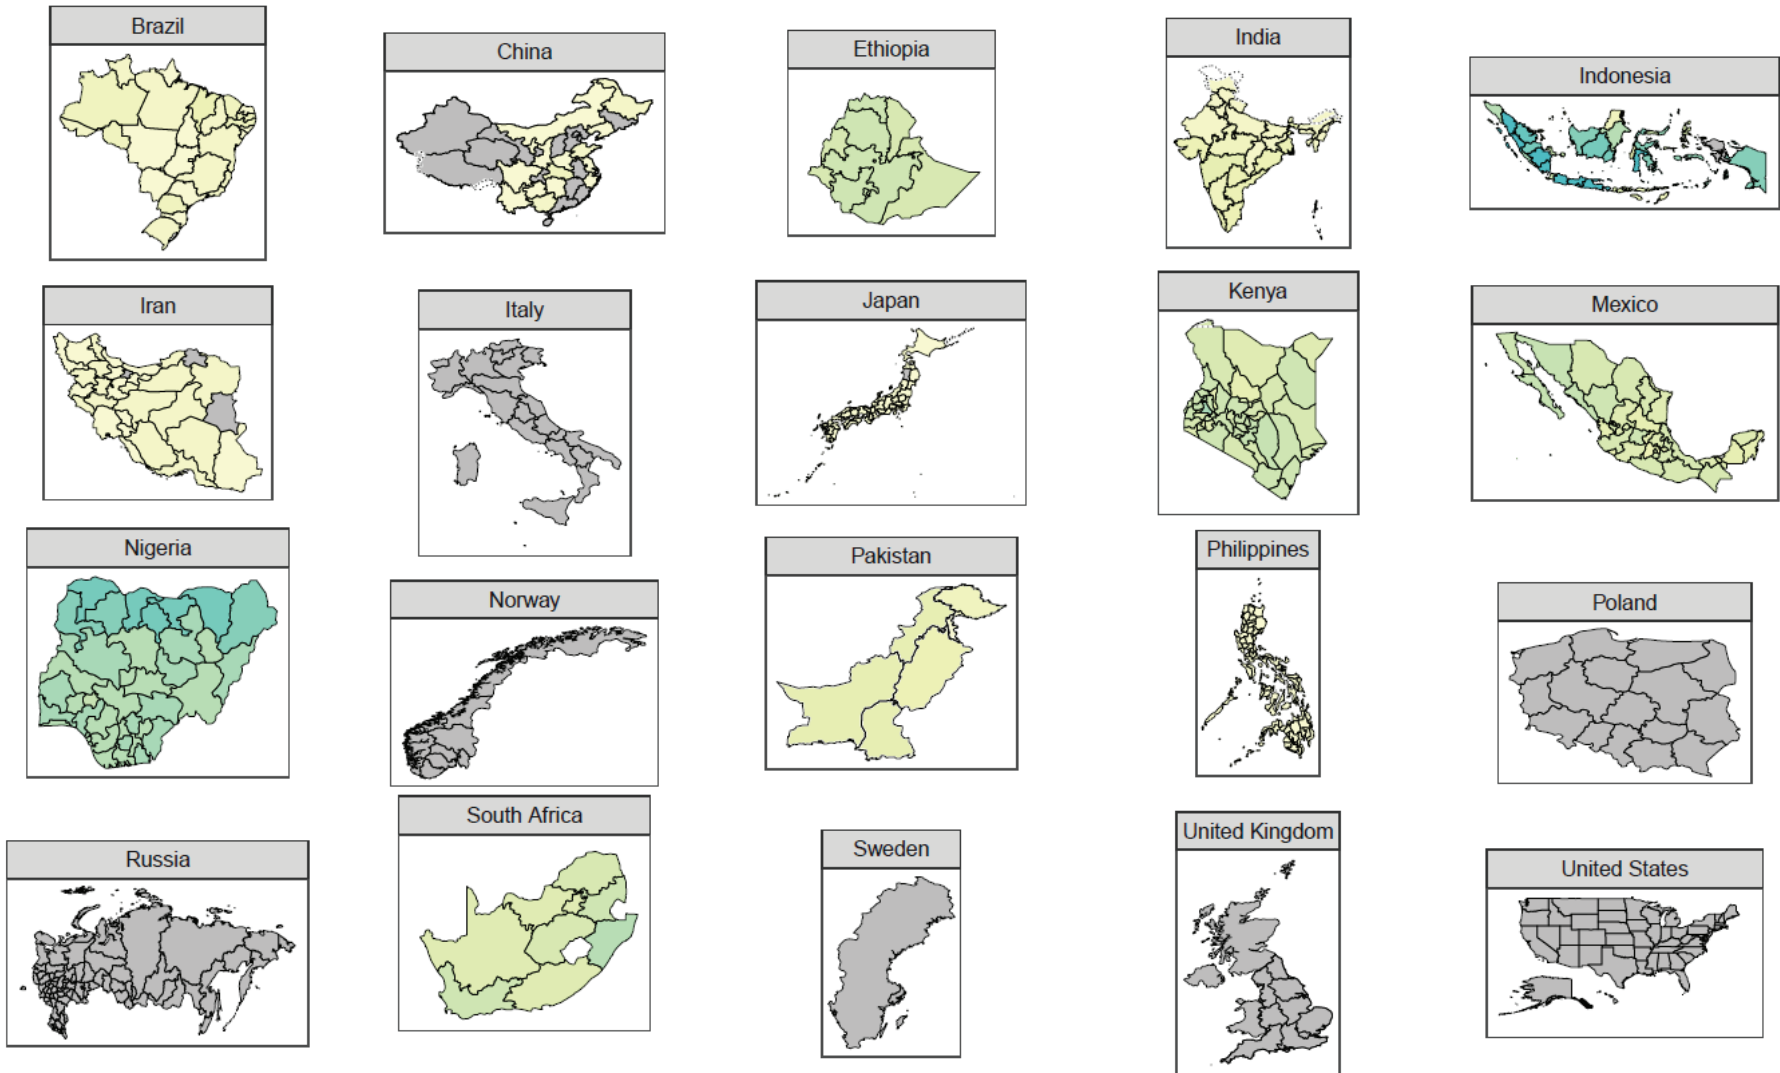

**Underweight Sources**

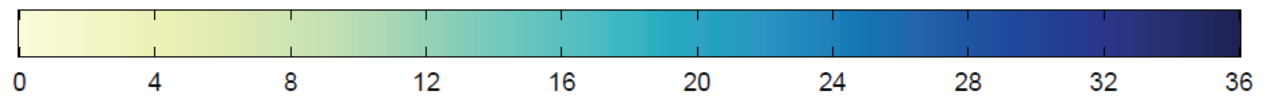

**Fig. S3. Estimated prevalence of overall, severe, and extreme CGF for all locations.** Estimated prevalences of overall, severe, and extreme stunting (A–C), wasting (D–F), and underweight (G–I) among children under 5, both sexes, are shown in 1990. Additional maps are shown for 2000 (J–R), and 2010 (S–AA).

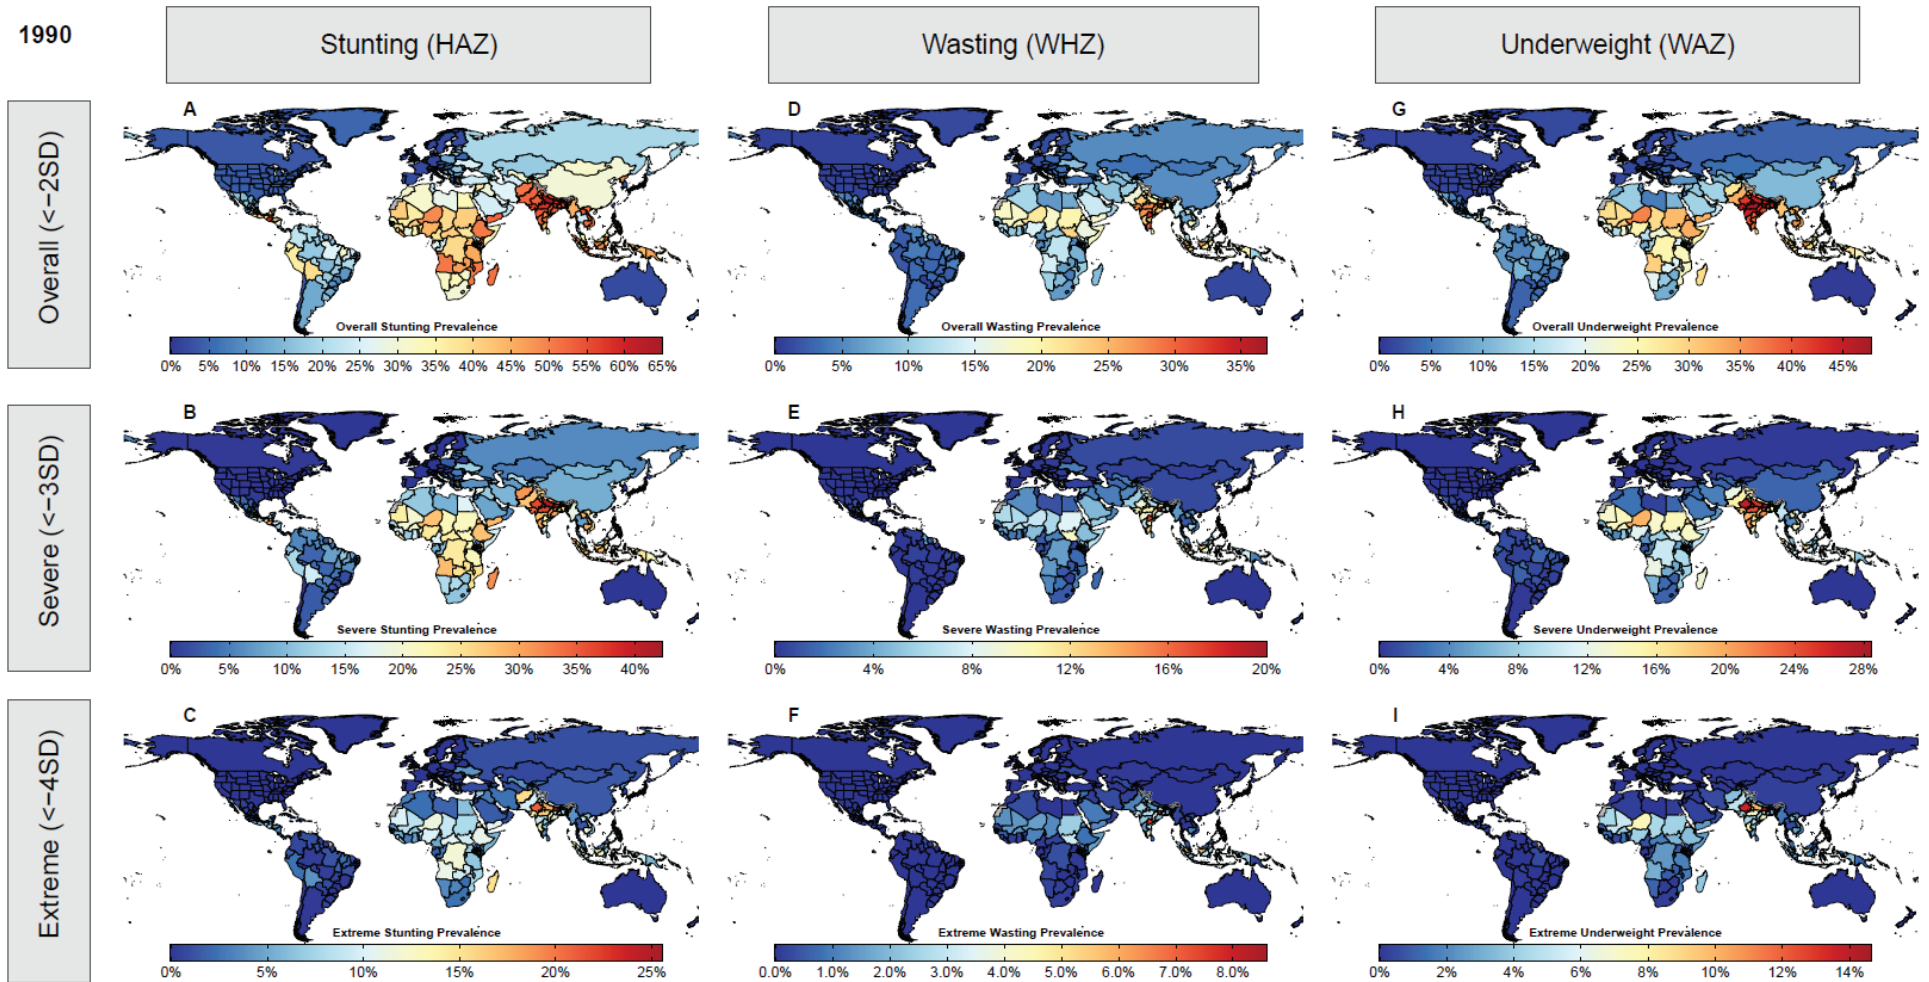

2000

Stunting (HAZ)

Wasting (WHZ)

Underweight (WAZ)

Overall (<-2SD)

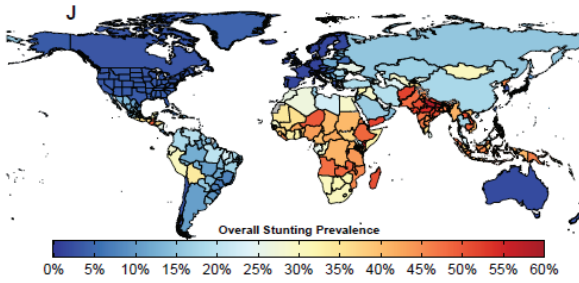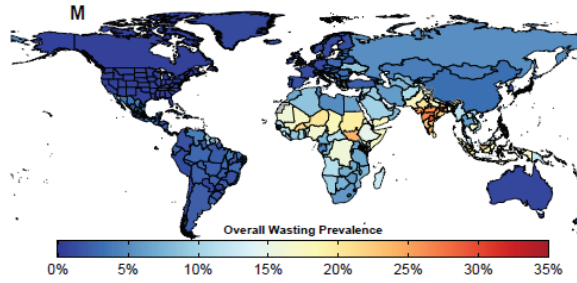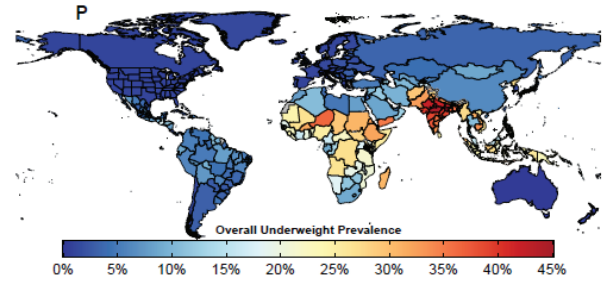

Severe (<-3SD)

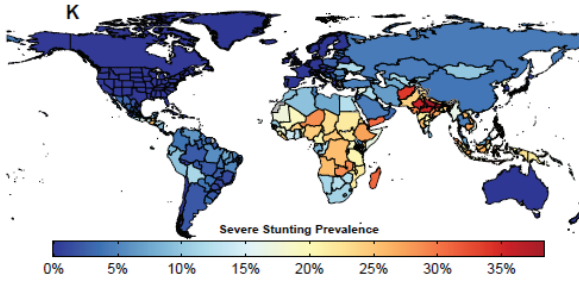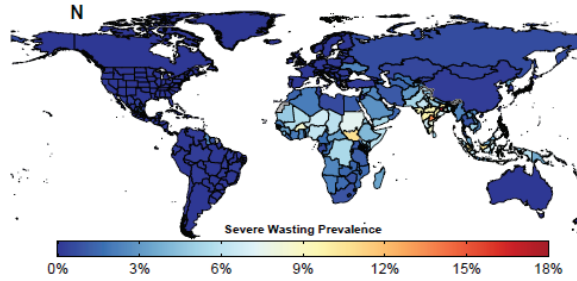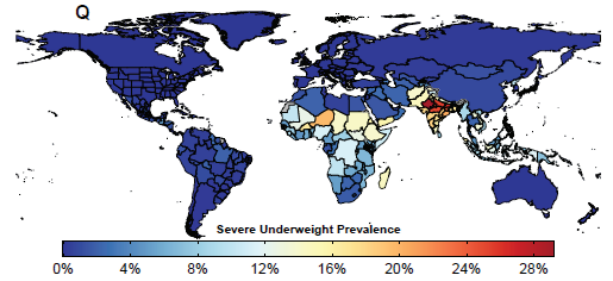

Extreme (<-4SD)

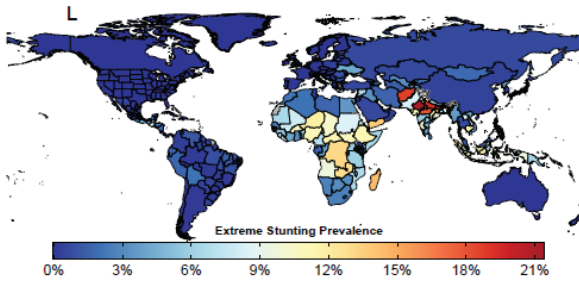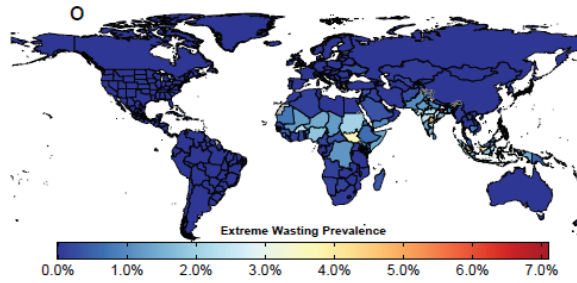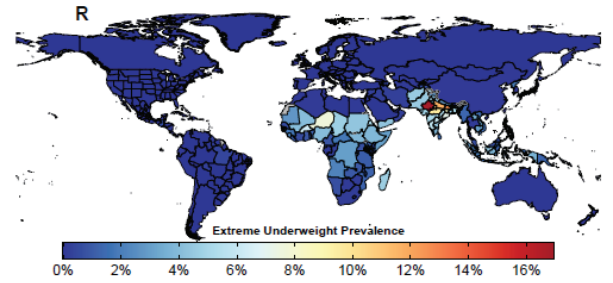

2010

Stunting (HAZ)

Wasting (WHZ)

Underweight (WAZ)

Overall (<-2SD)

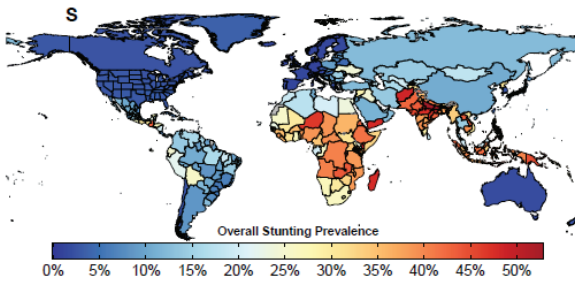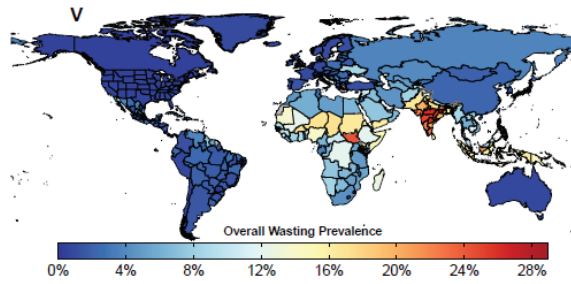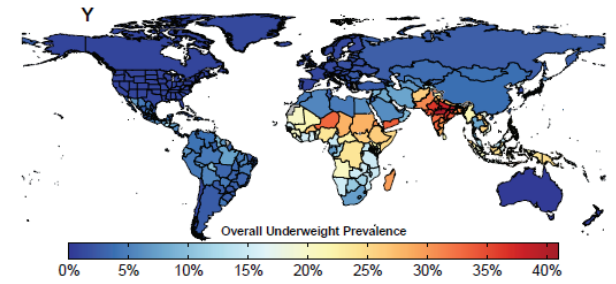

Severe (<-3SD)

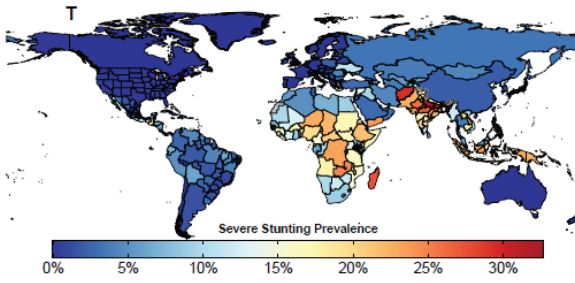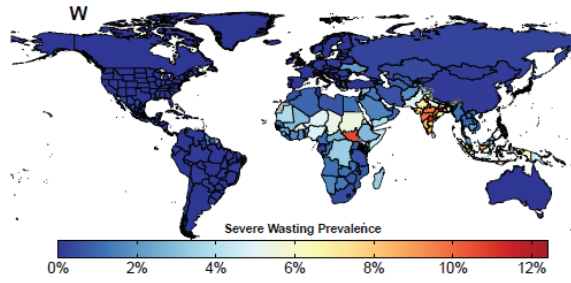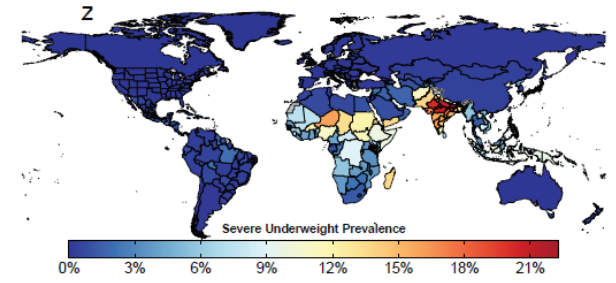

Extreme (<-4SD)

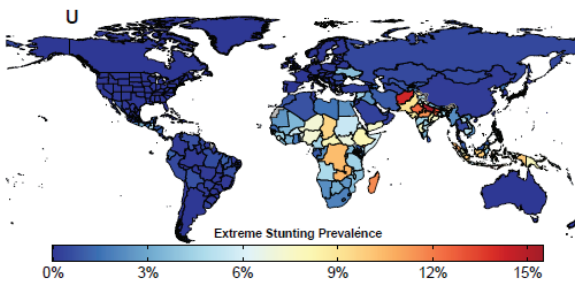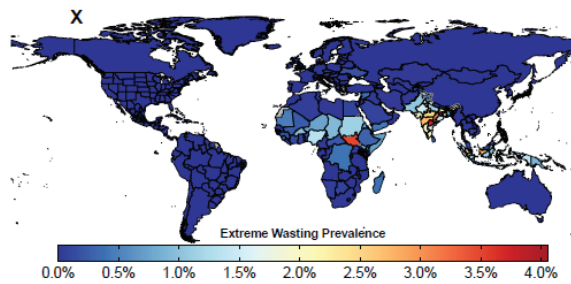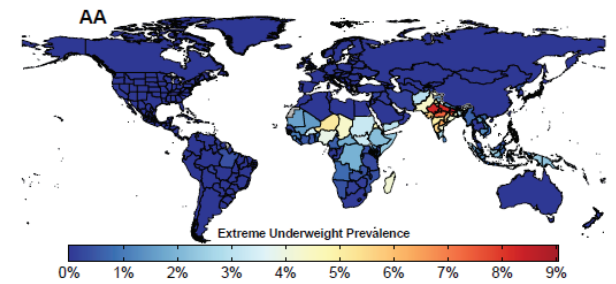

**Fig. S4. Relative changes in stunting, wasting, and underweight prevalences since 1990, by GBD super-region.** Relative changes in stunting, wasting, and underweight prevalences since 1990.

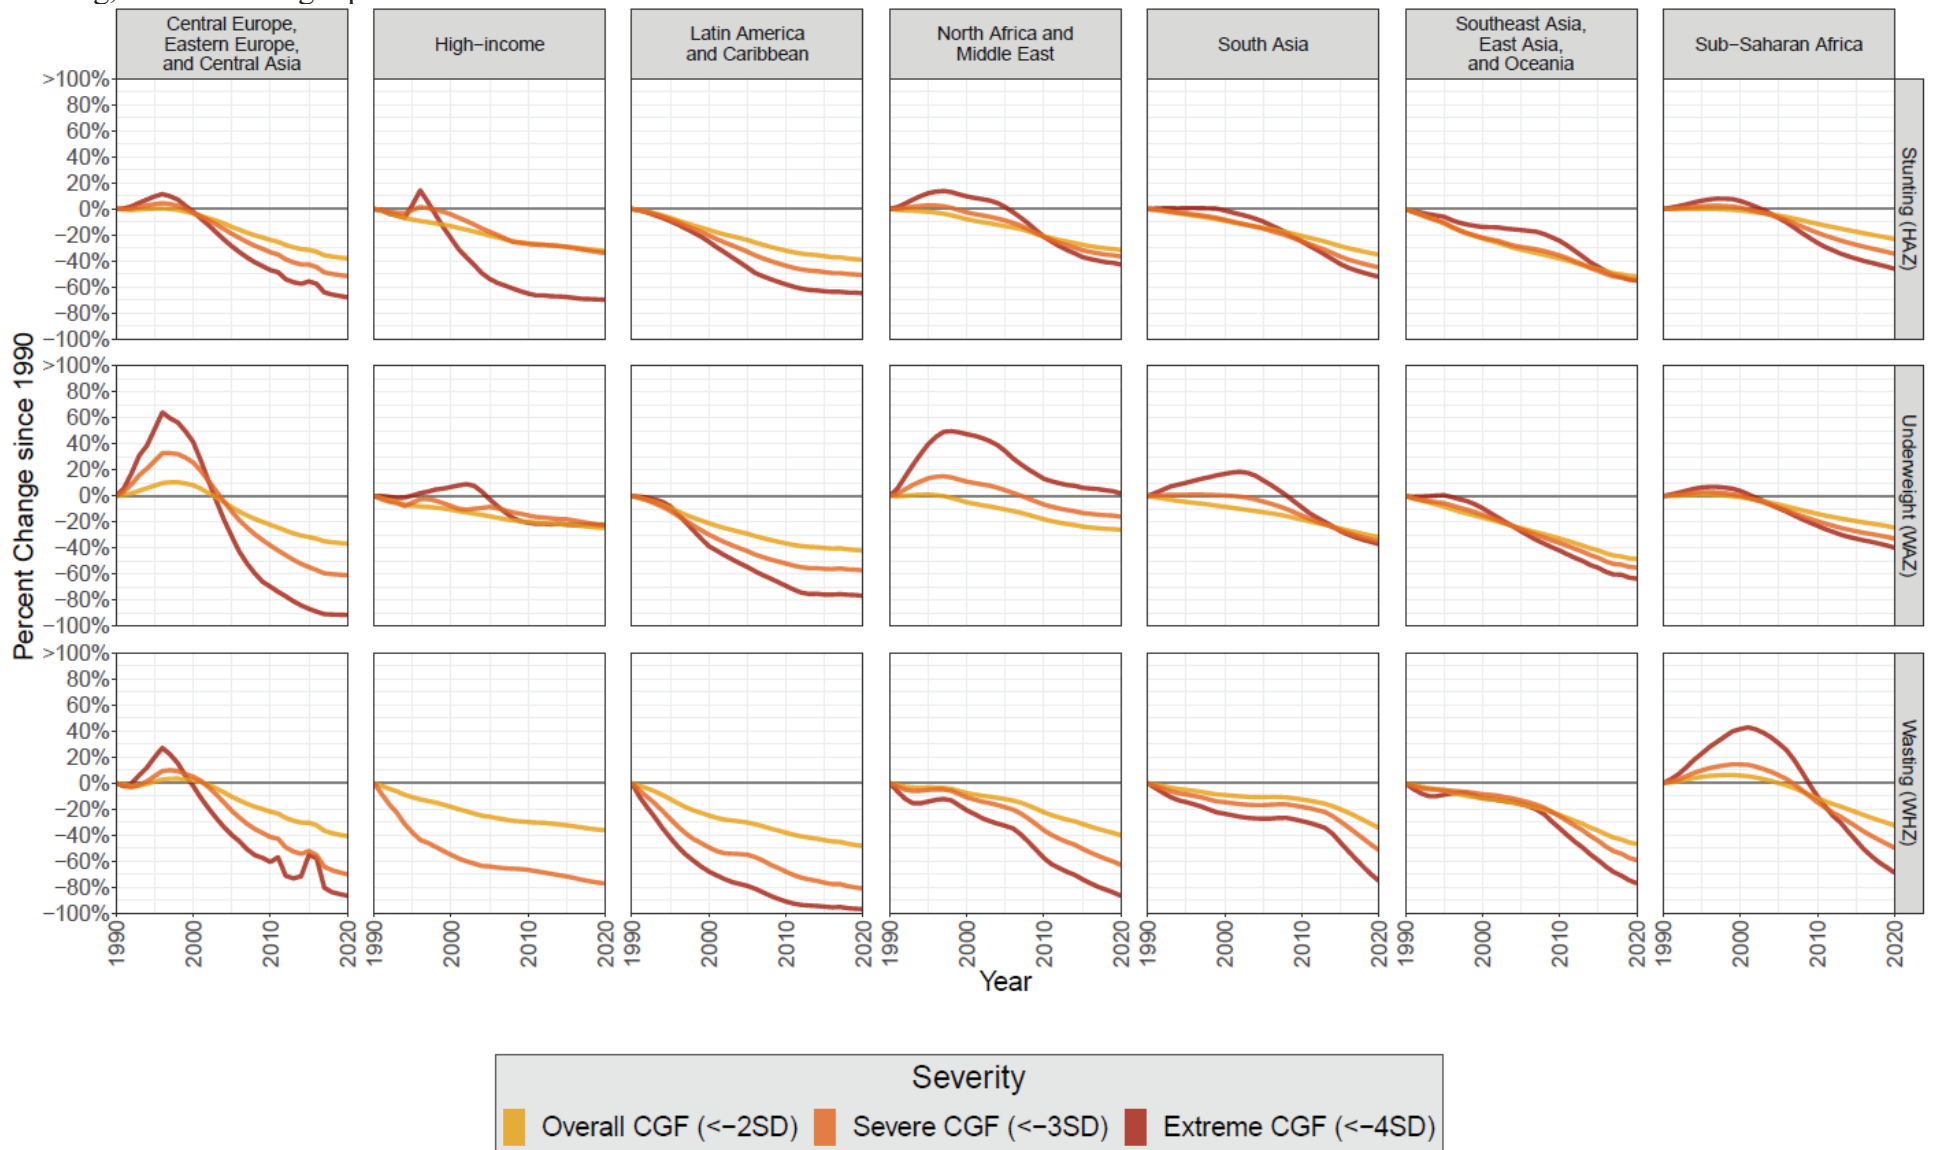

**Fig. S5. Locations assigned to each region and super-region in GBD.**

Locations assigned to each region (A) and super-region (B) in the GBD location hierarchy.

### A. Countries in each Region

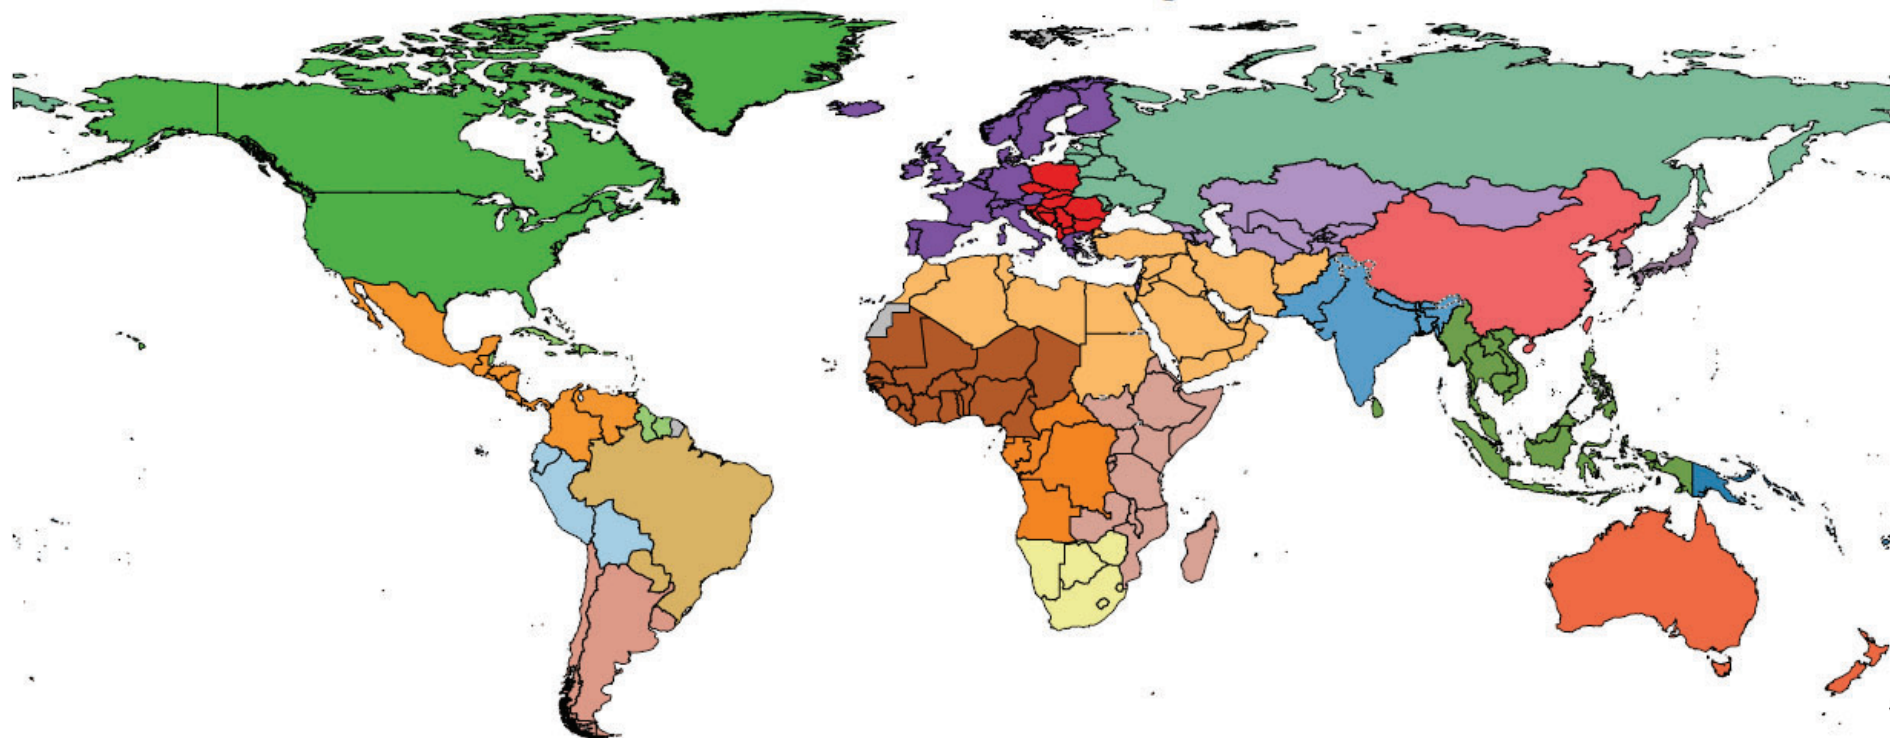

| Regions        |                |                          |                           |                        |                              |                             |
|----------------|----------------|--------------------------|---------------------------|------------------------|------------------------------|-----------------------------|
| East Asia      | Central Asia   | High-income Asia Pacific | Southern Latin America    | Andean Latin America   | North Africa and Middle East | Eastern Sub-Saharan Africa  |
| Southeast Asia | Central Europe | Australasia              | High-income North America | Central Latin America  | South Asia                   | Southern Sub-Saharan Africa |
| Oceania        | Eastern Europe | Western Europe           | Caribbean                 | Tropical Latin America | Central Sub-Saharan Africa   | Western Sub-Saharan Africa  |

**B. Countries in each Super Region**

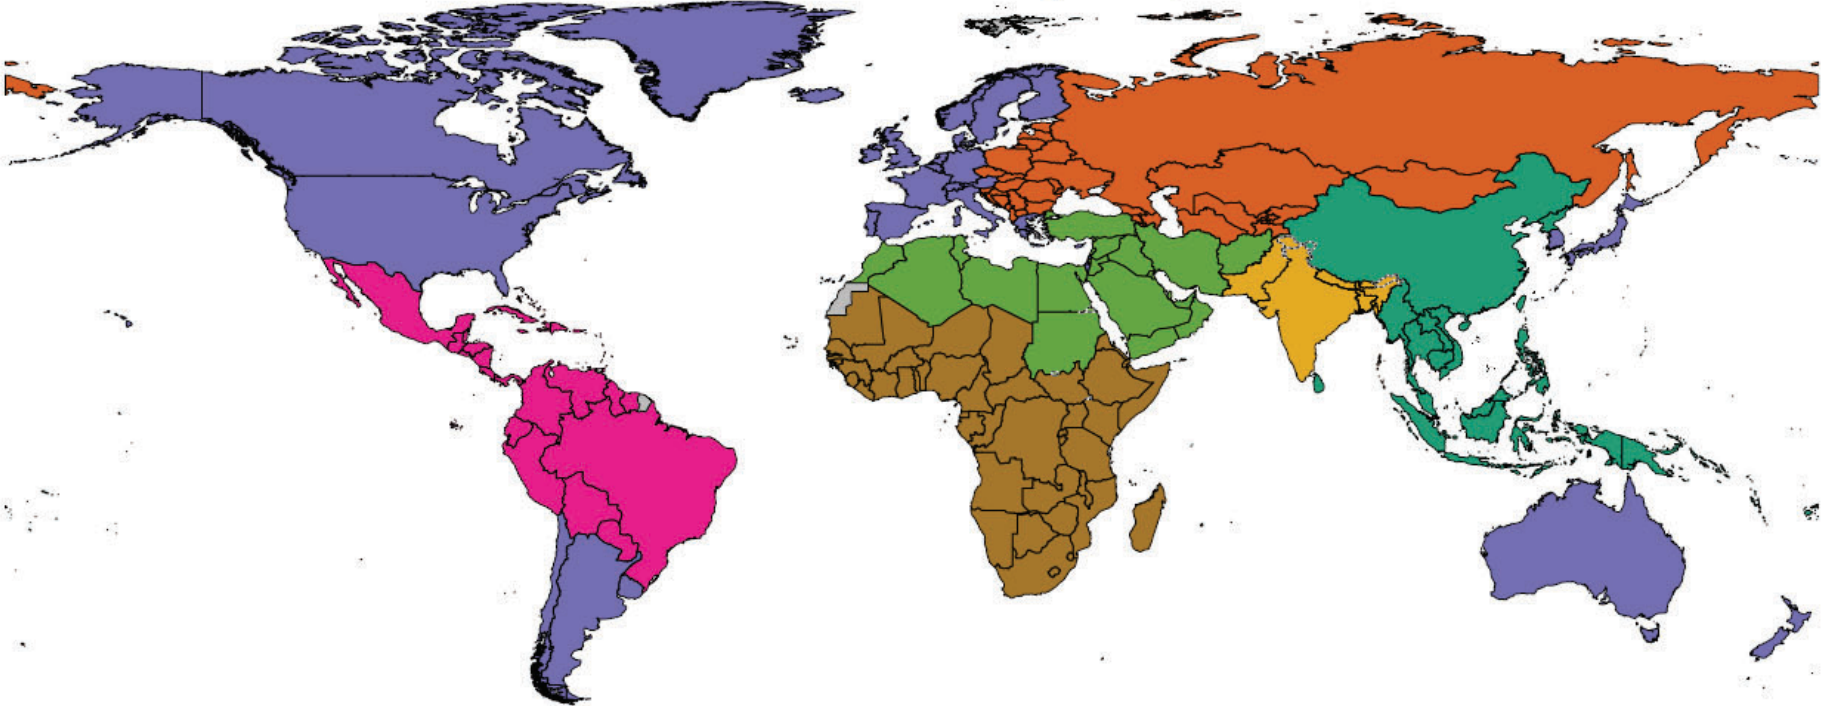

**Super Regions**

|             |                                                  |
|-------------|--------------------------------------------------|
| Green       | Southeast Asia, East Asia, and Oceania           |
| Orange      | Central Europe, Eastern Europe, and Central Asia |
| Purple      | High-income                                      |
| Pink        | Latin America and Caribbean                      |
| Light Green | North Africa and Middle East                     |
| Yellow      | South Asia                                       |
| Brown       | Sub-Saharan Africa                               |



**Fig. S6. Epidemiological transition analysis of severe and extreme CGF by region.** The expected values of severe stunting, wasting, and underweight based on UHC index are represented by the black lines in (A), (B), and (C). The expected values of extreme stunting, wasting, and underweight are shown in (D), (E), and (F). Estimated values are shown for each region, and colored by super region. Points are shown every five years from 1990–2020.

### Severe CGF Epidemiological Transition Analysis by Region

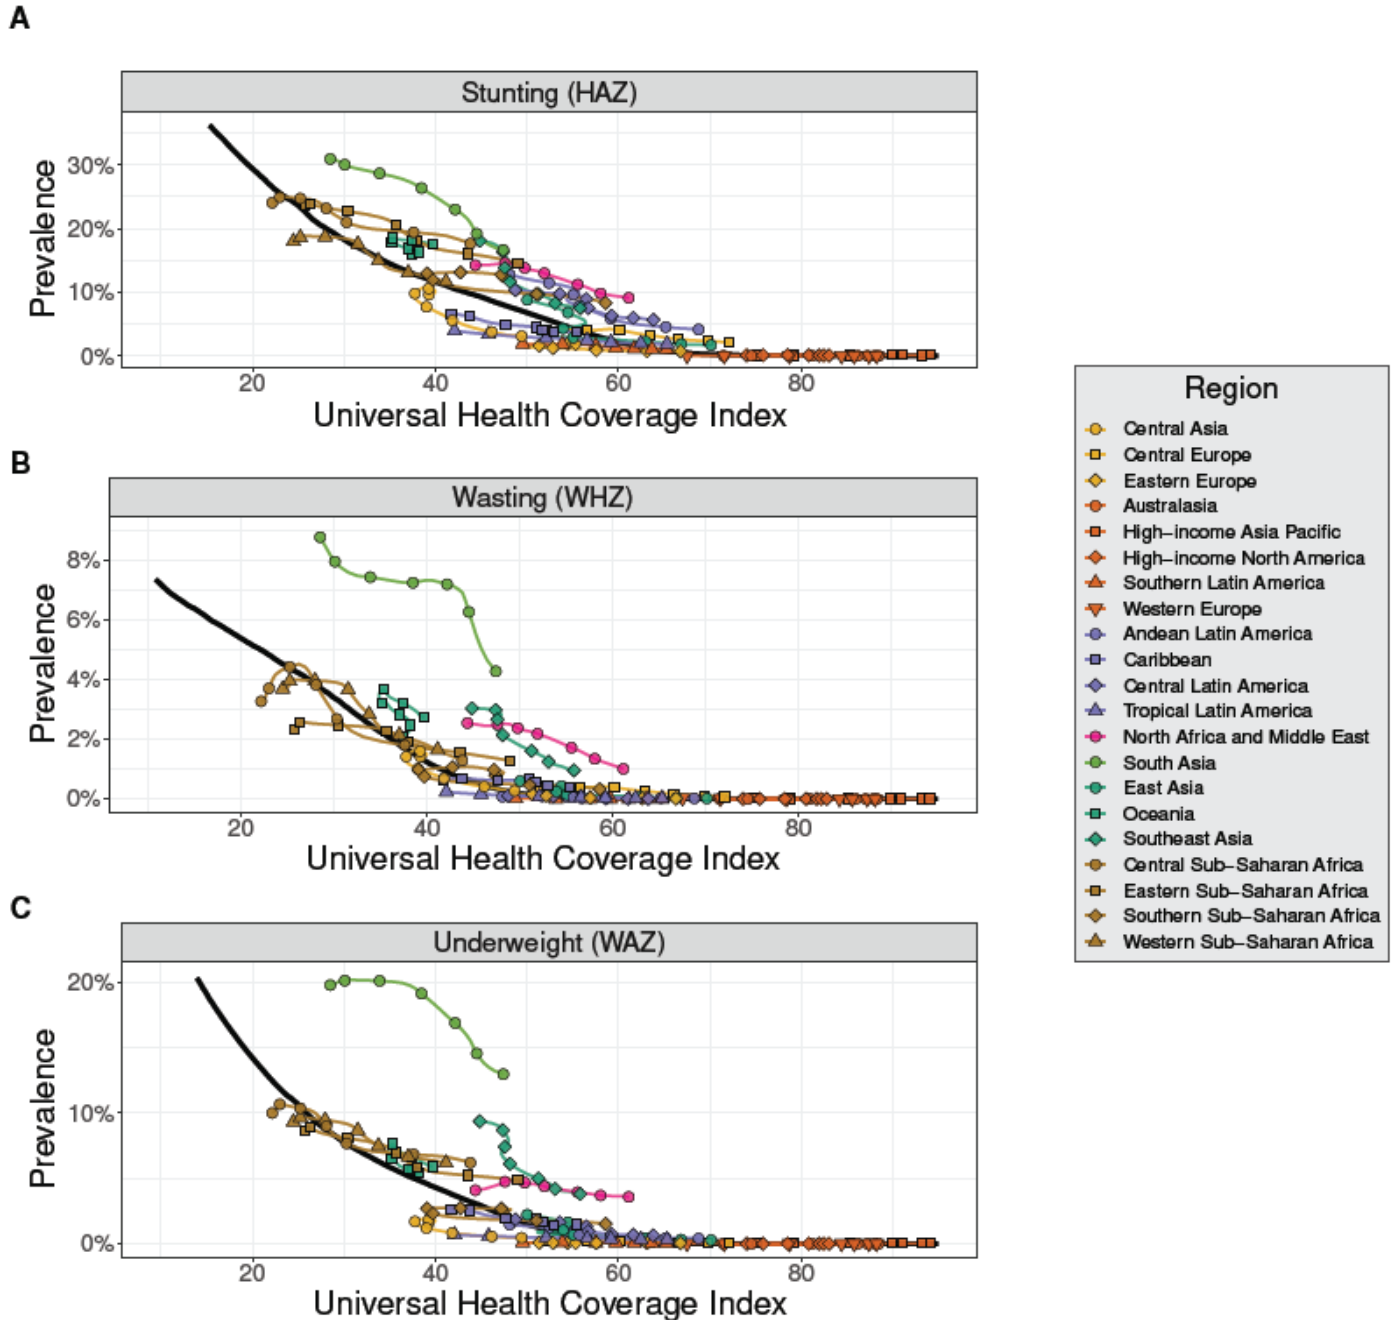

# Extreme CGF Epidemiological Transition Analysis by Region

D

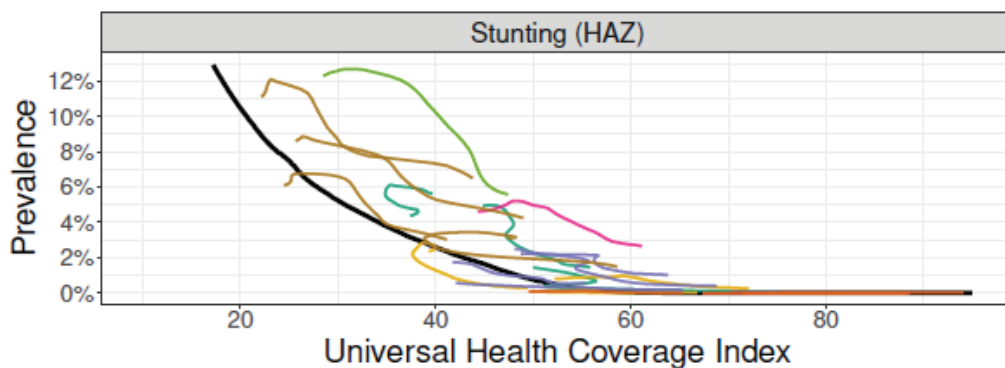

E

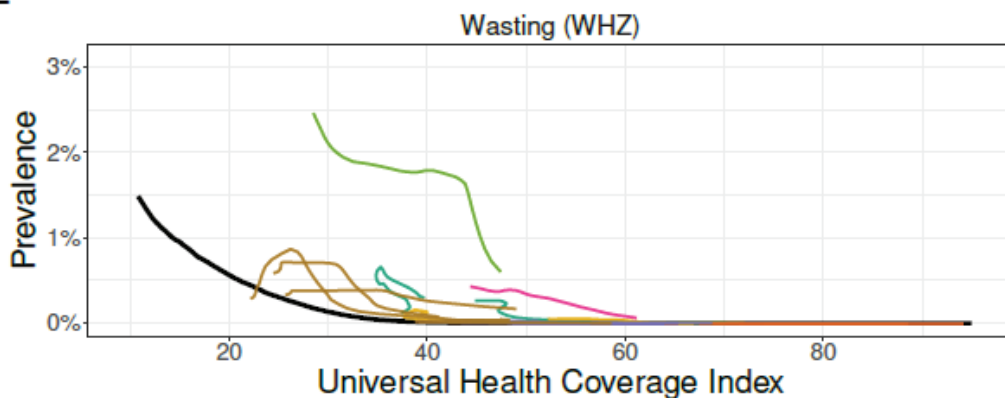

F

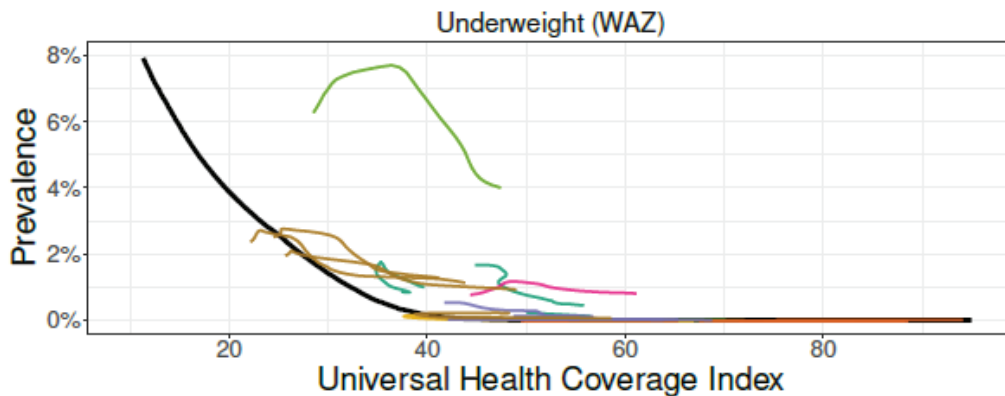

## Region

- Central Asia
- Central Europe
- Eastern Europe
- Australasia
- High-income Asia Pacific
- High-income North America
- Southern Latin America
- Western Europe
- Andean Latin America
- Caribbean
- Central Latin America
- Tropical Latin America
- North Africa and Middle East
- South Asia
- East Asia
- Oceania
- Southeast Asia
- Central Sub-Saharan Africa
- Eastern Sub-Saharan Africa
- Southern Sub-Saharan Africa
- Western Sub-Saharan Africa

**Fig. S7. Estimated values of all forms and severities of CGF compared to expected values based on UHC index for all locations within each region.** Performance of individual countries and territories are shown for the following GBD regions: Central Asia (A), Central Europe (B), Eastern Europe (C), Australasia (D), High-income Asia Pacific (E), High-income North America (F), Southern Latin America (G), Western Europe (H), Andean Latin America (I), Caribbean (J), Central Latin America (K), Tropical Latin America (L), North Africa and Middle East (M), South Asia (N), East Asia (O), Oceania (P), Southeast Asia (Q), Central Sub-Saharan Africa (R), Eastern Sub-Saharan Africa (S), Southern Sub-Saharan Africa (T), and Western Sub-Saharan Africa (U). Points are shown for every five years from 1990–2020 with the grey line and grey squares representing the estimate for the aggregated region.

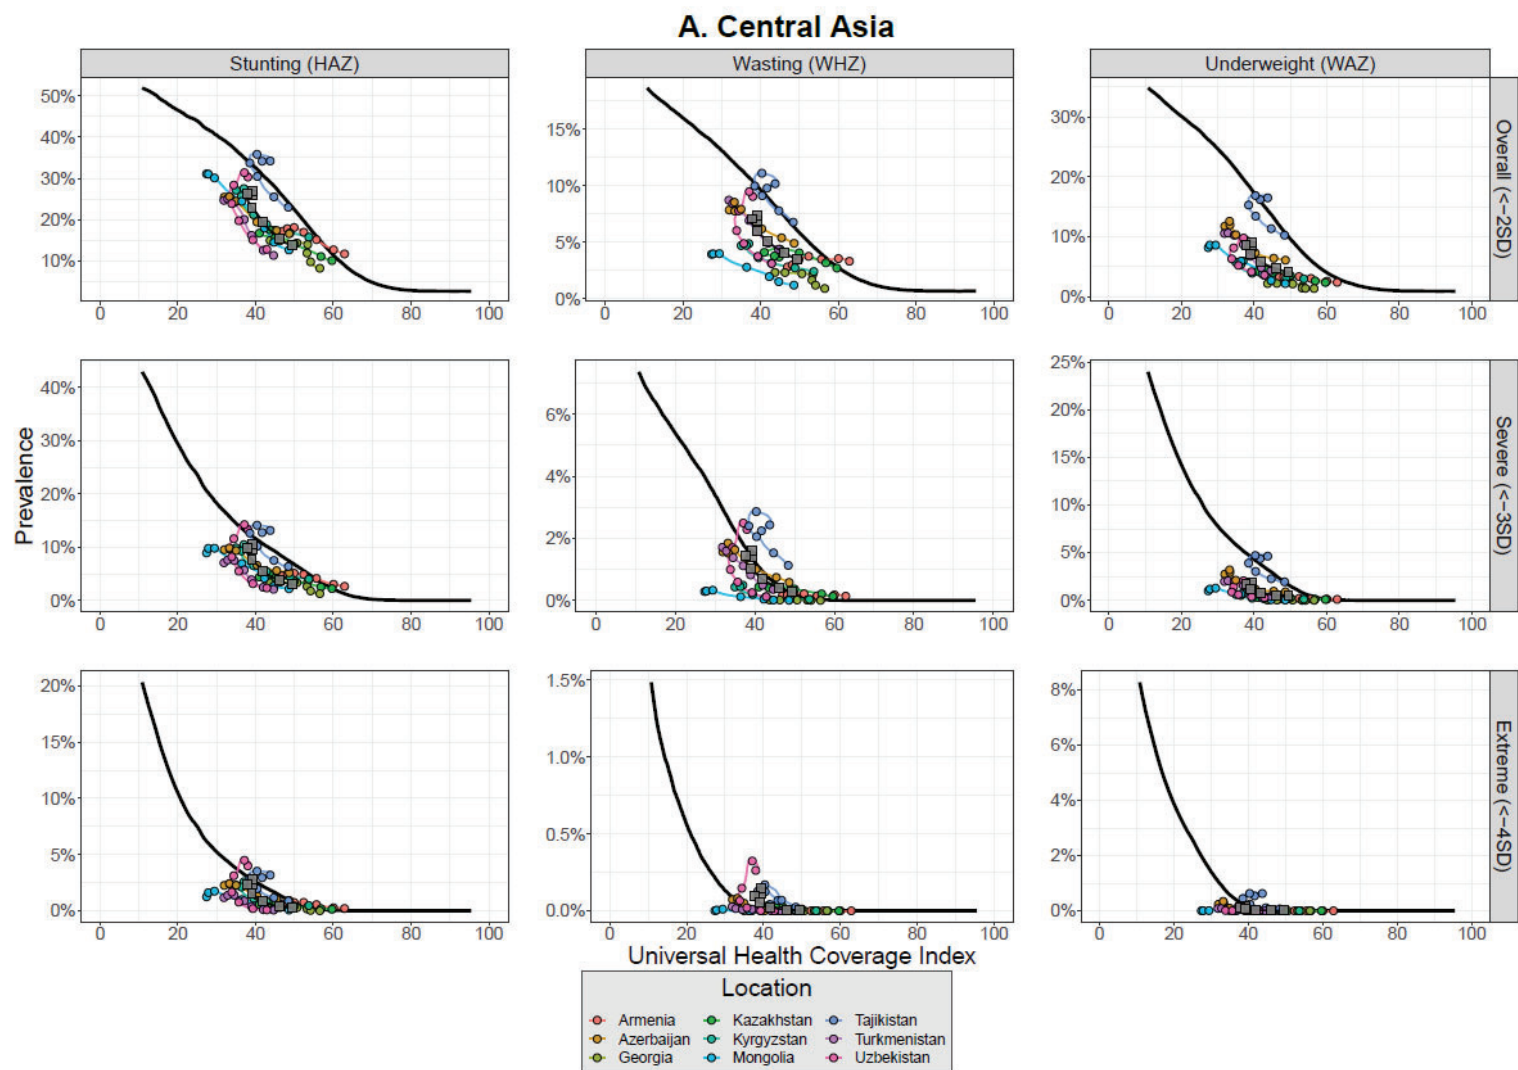

## B. Central Europe

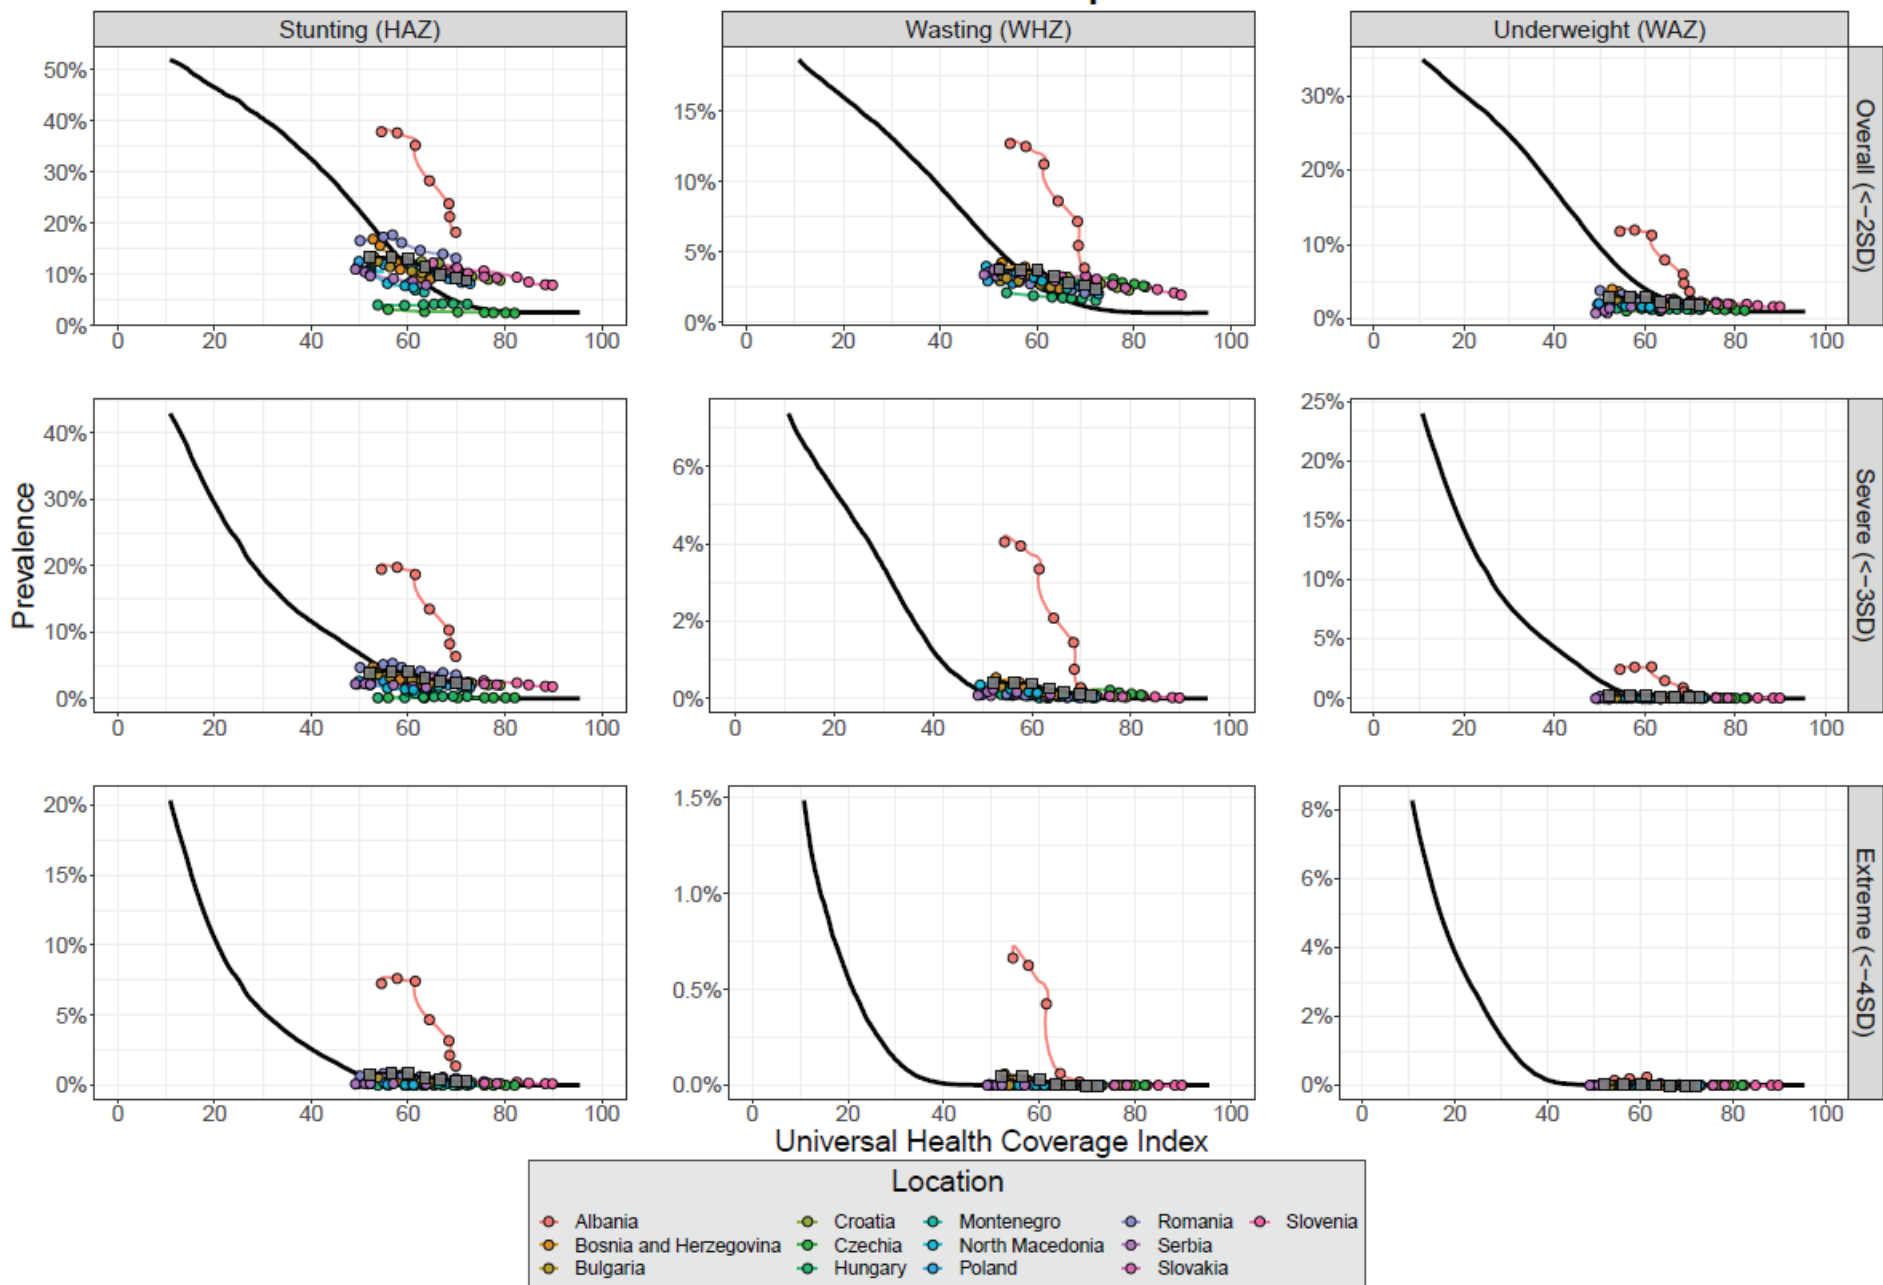

### C. Eastern Europe

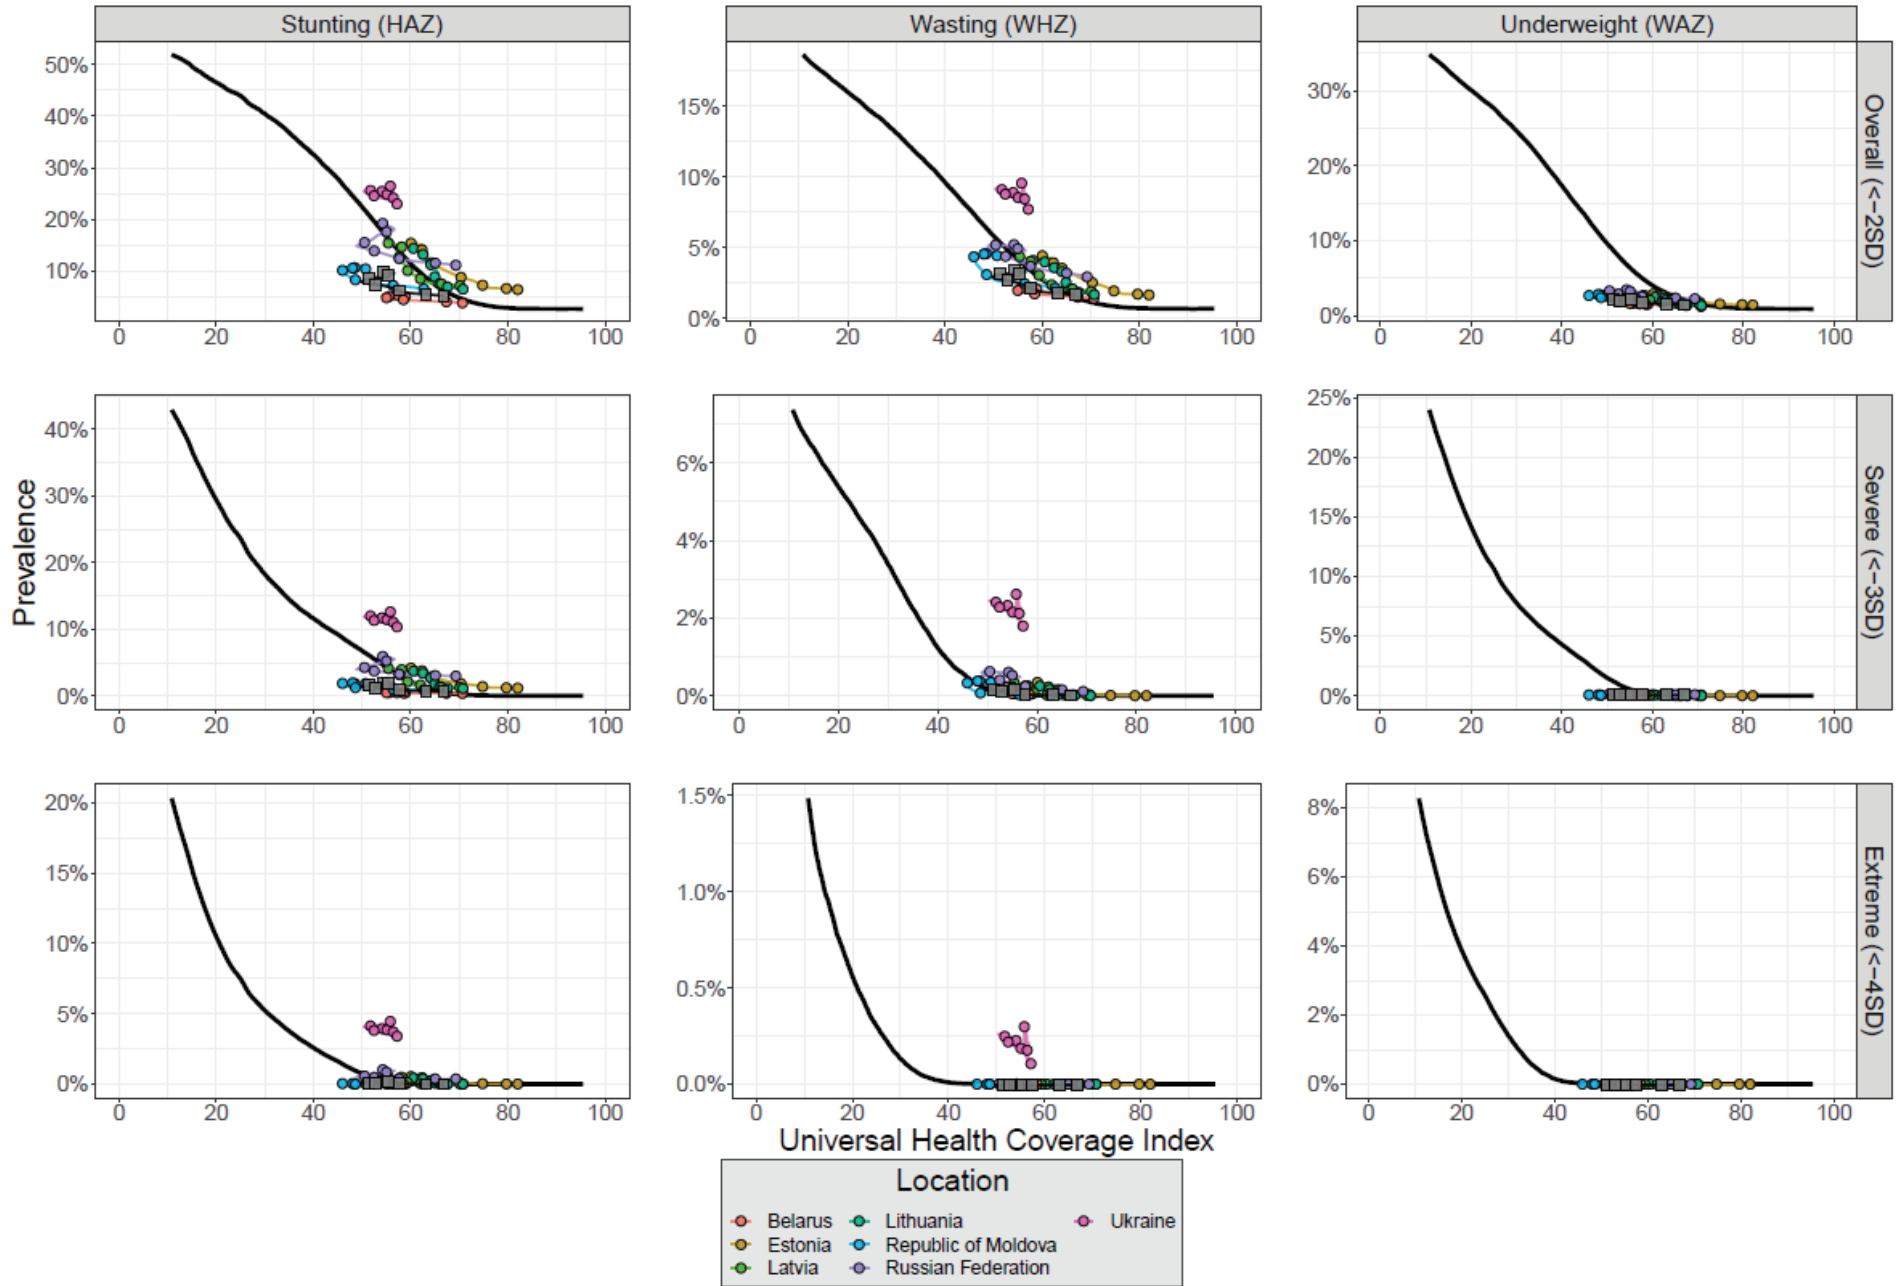

## D. Australasia

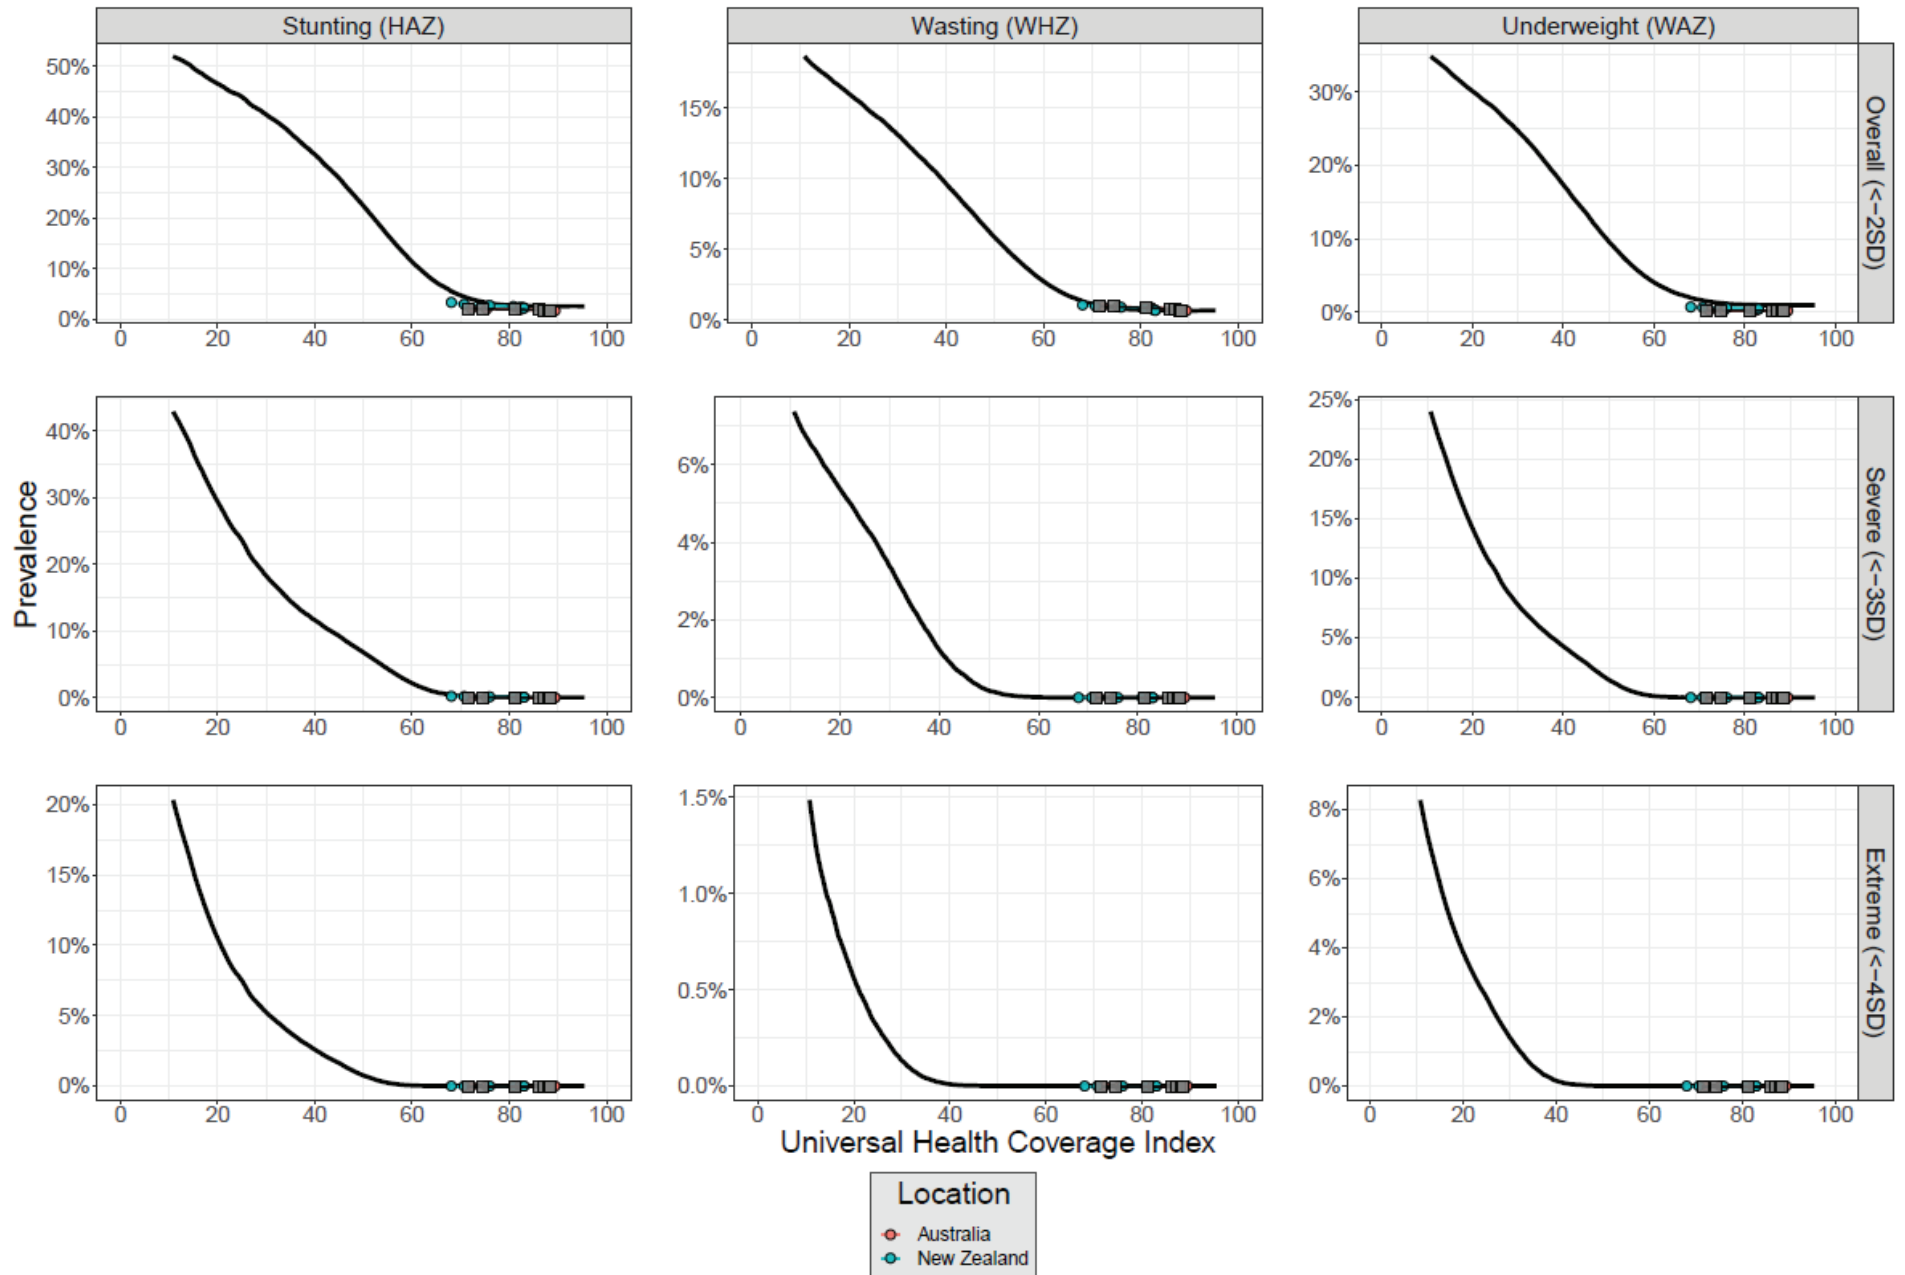

### E. High-income Asia Pacific

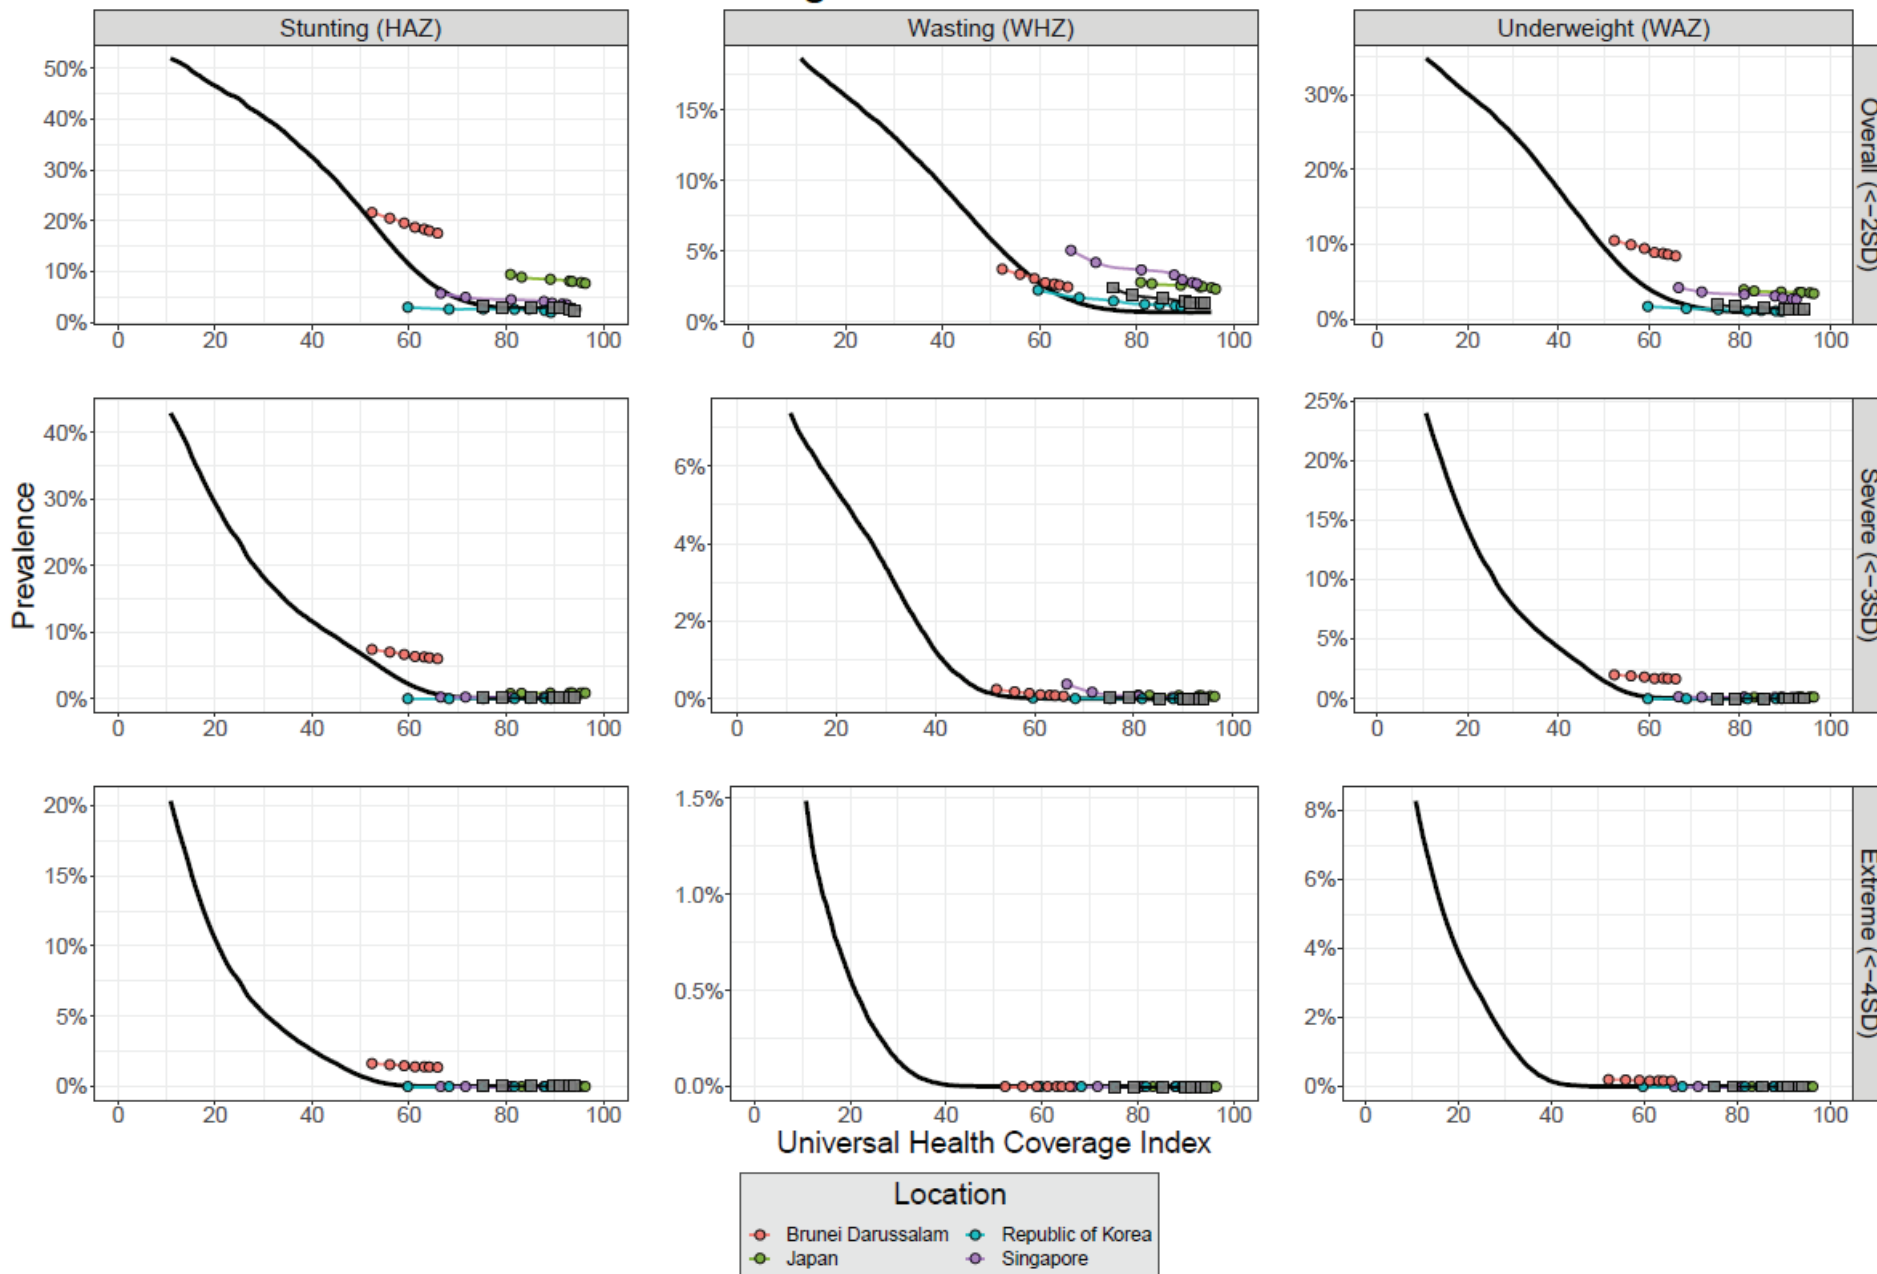

## F. High-income North America

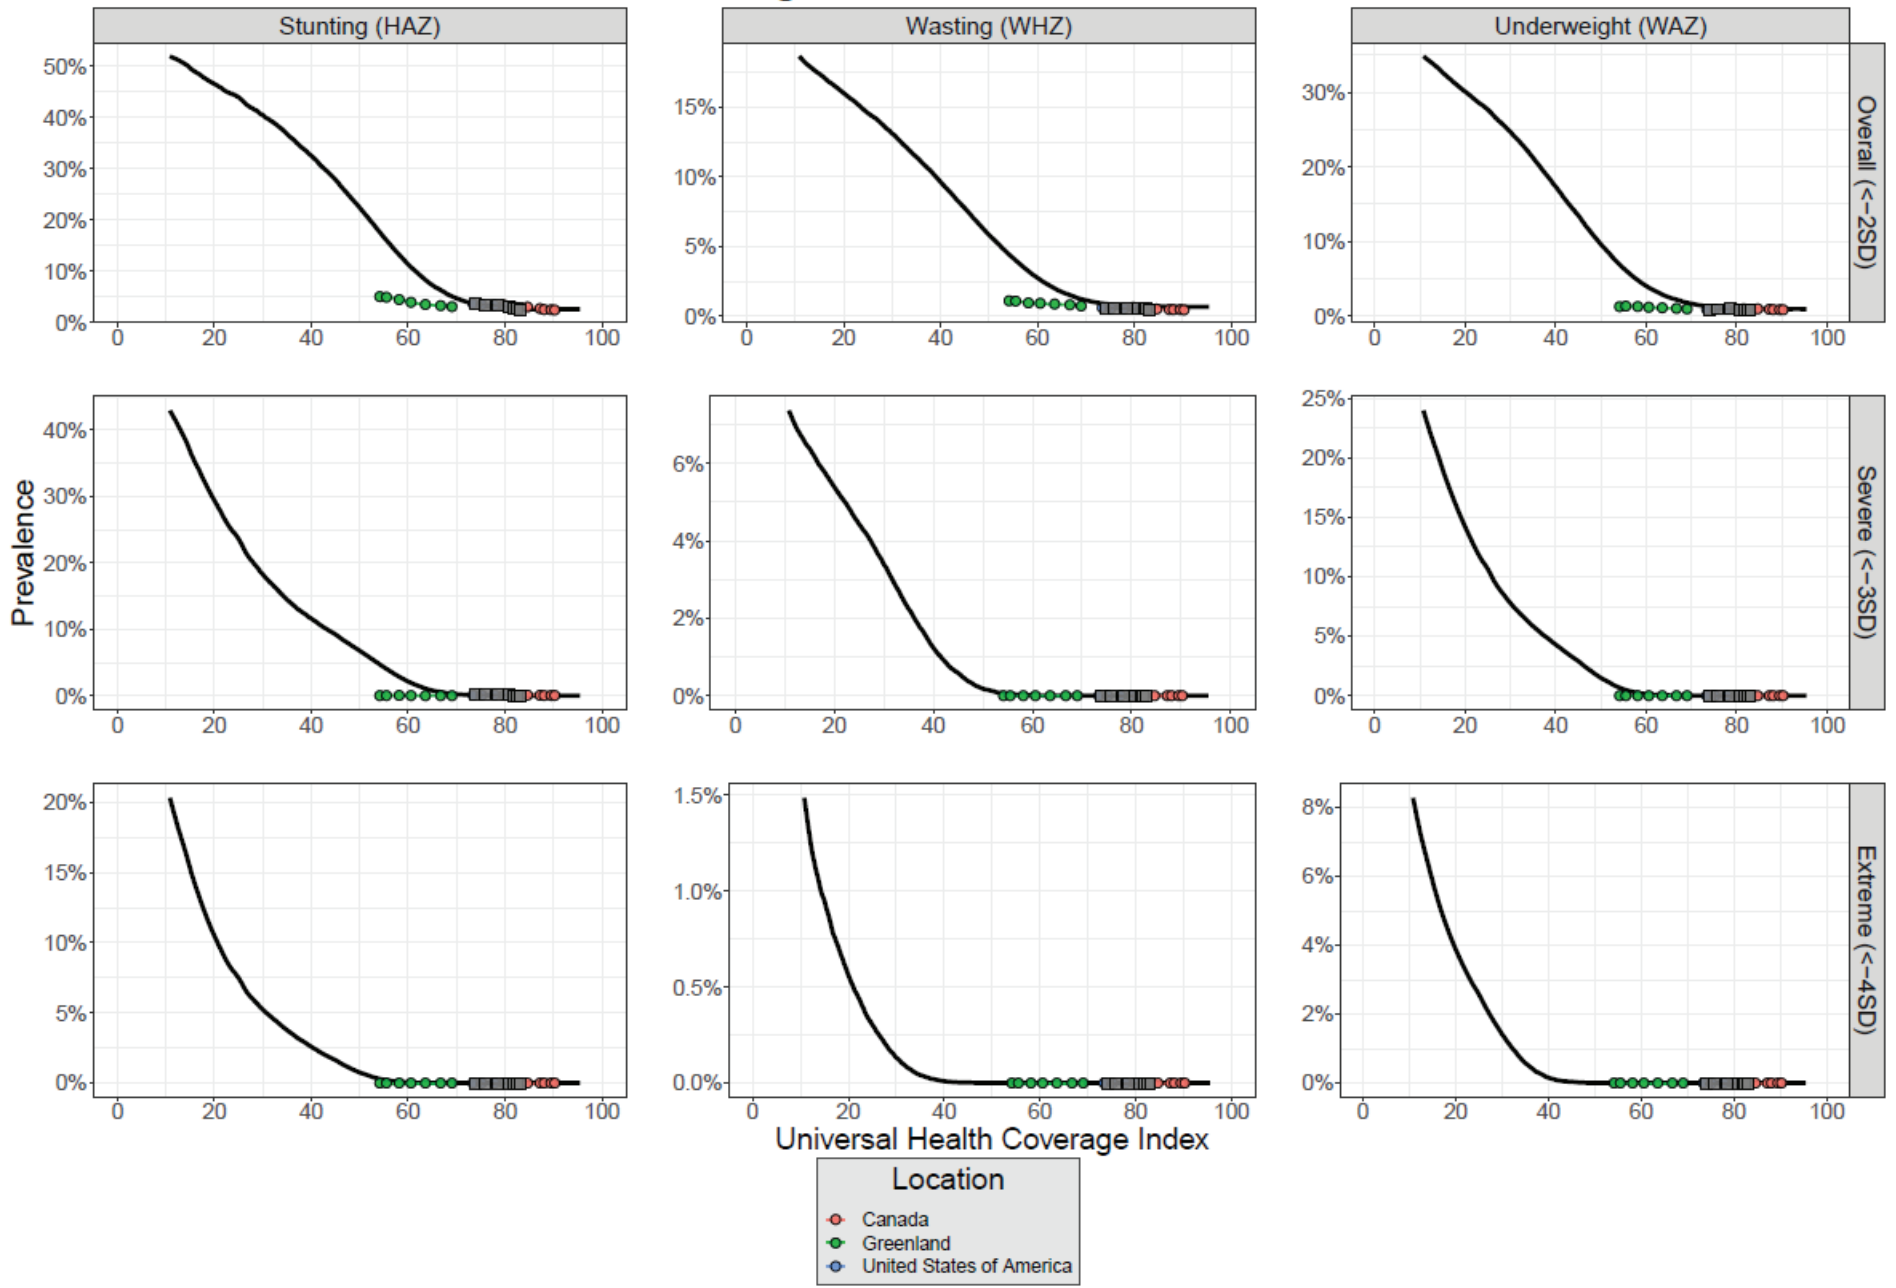



### G. Southern Latin America

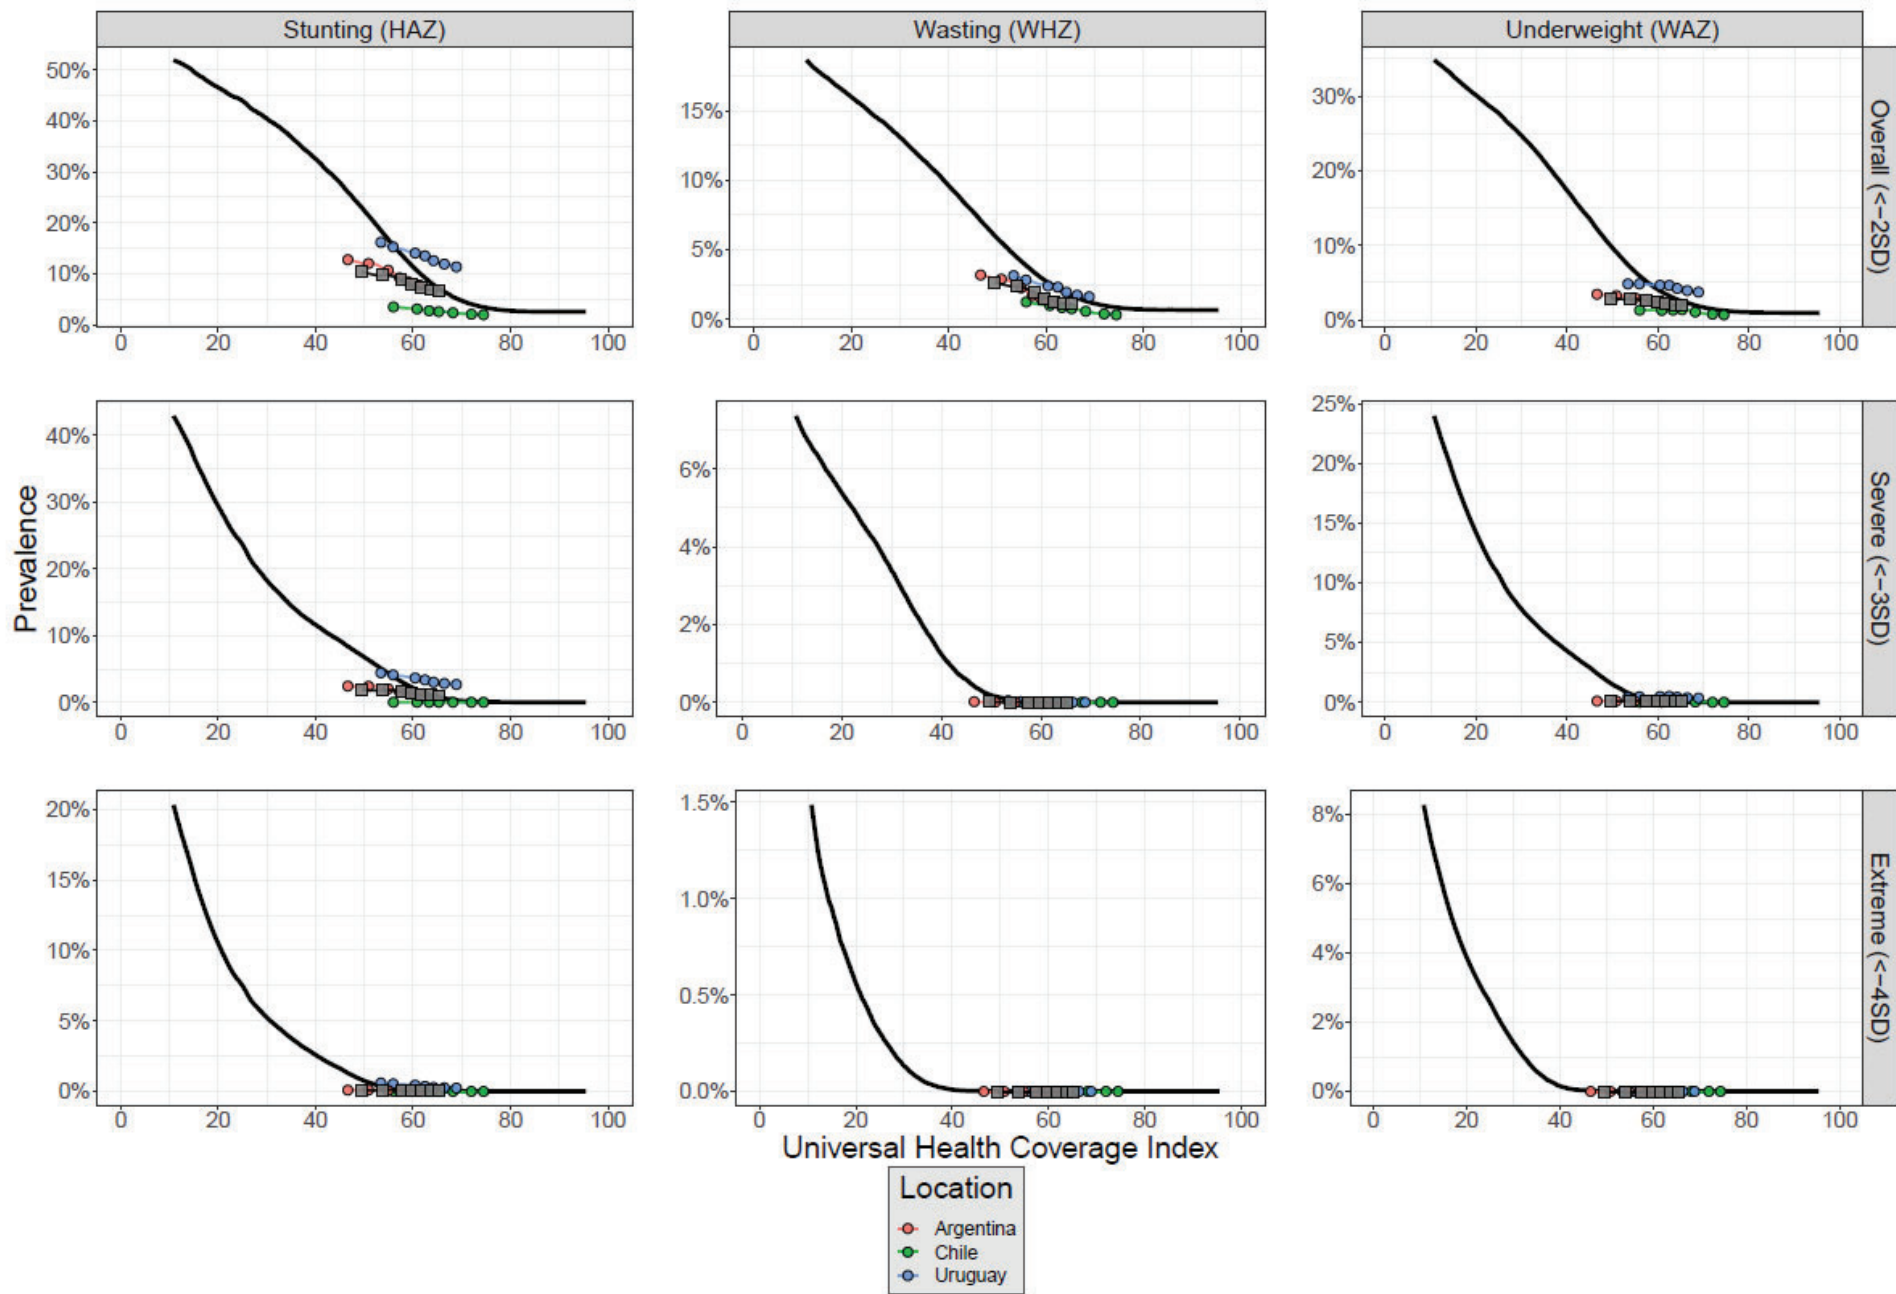

## H. Western Europe

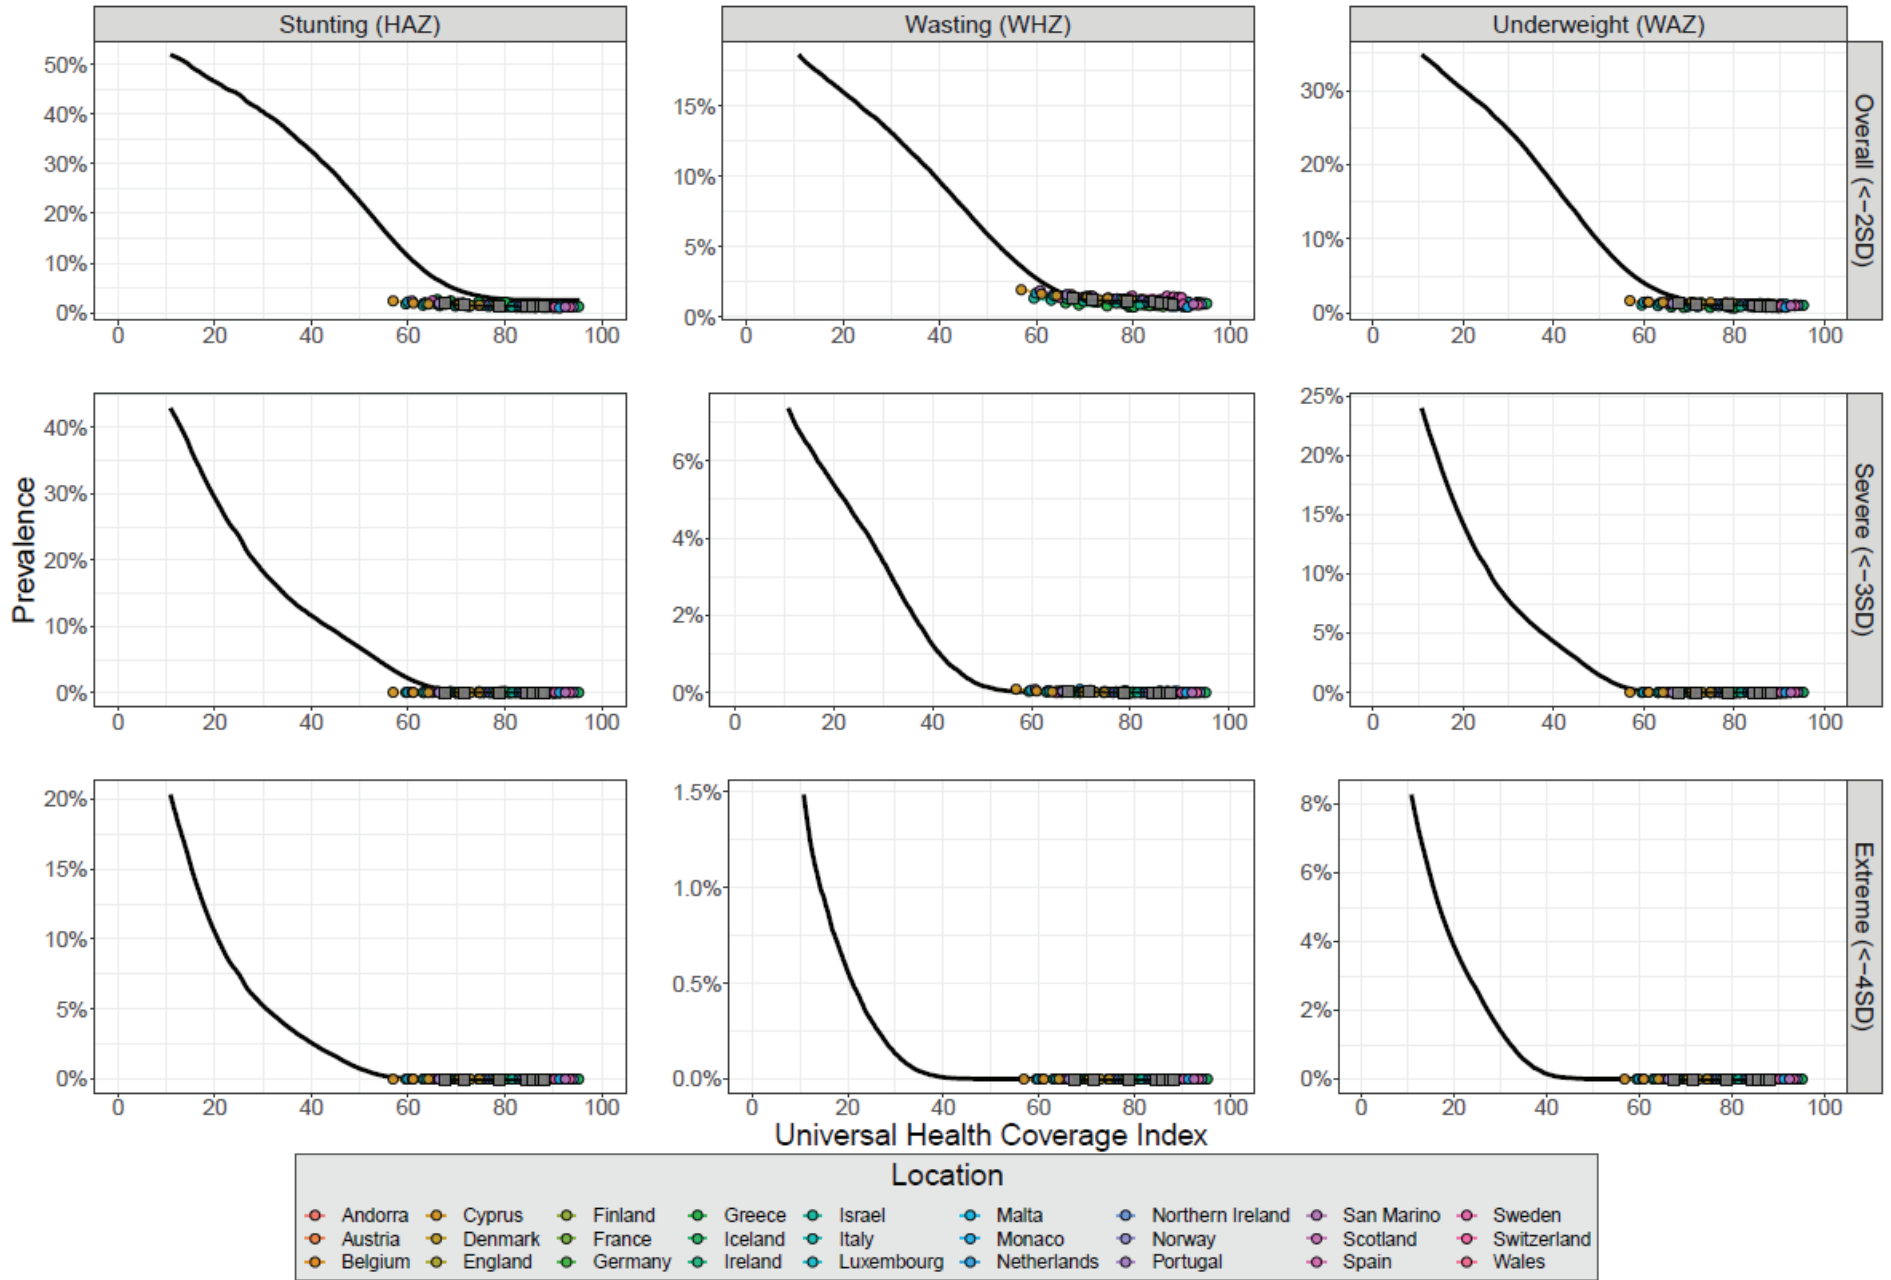

# I. Andean Latin America

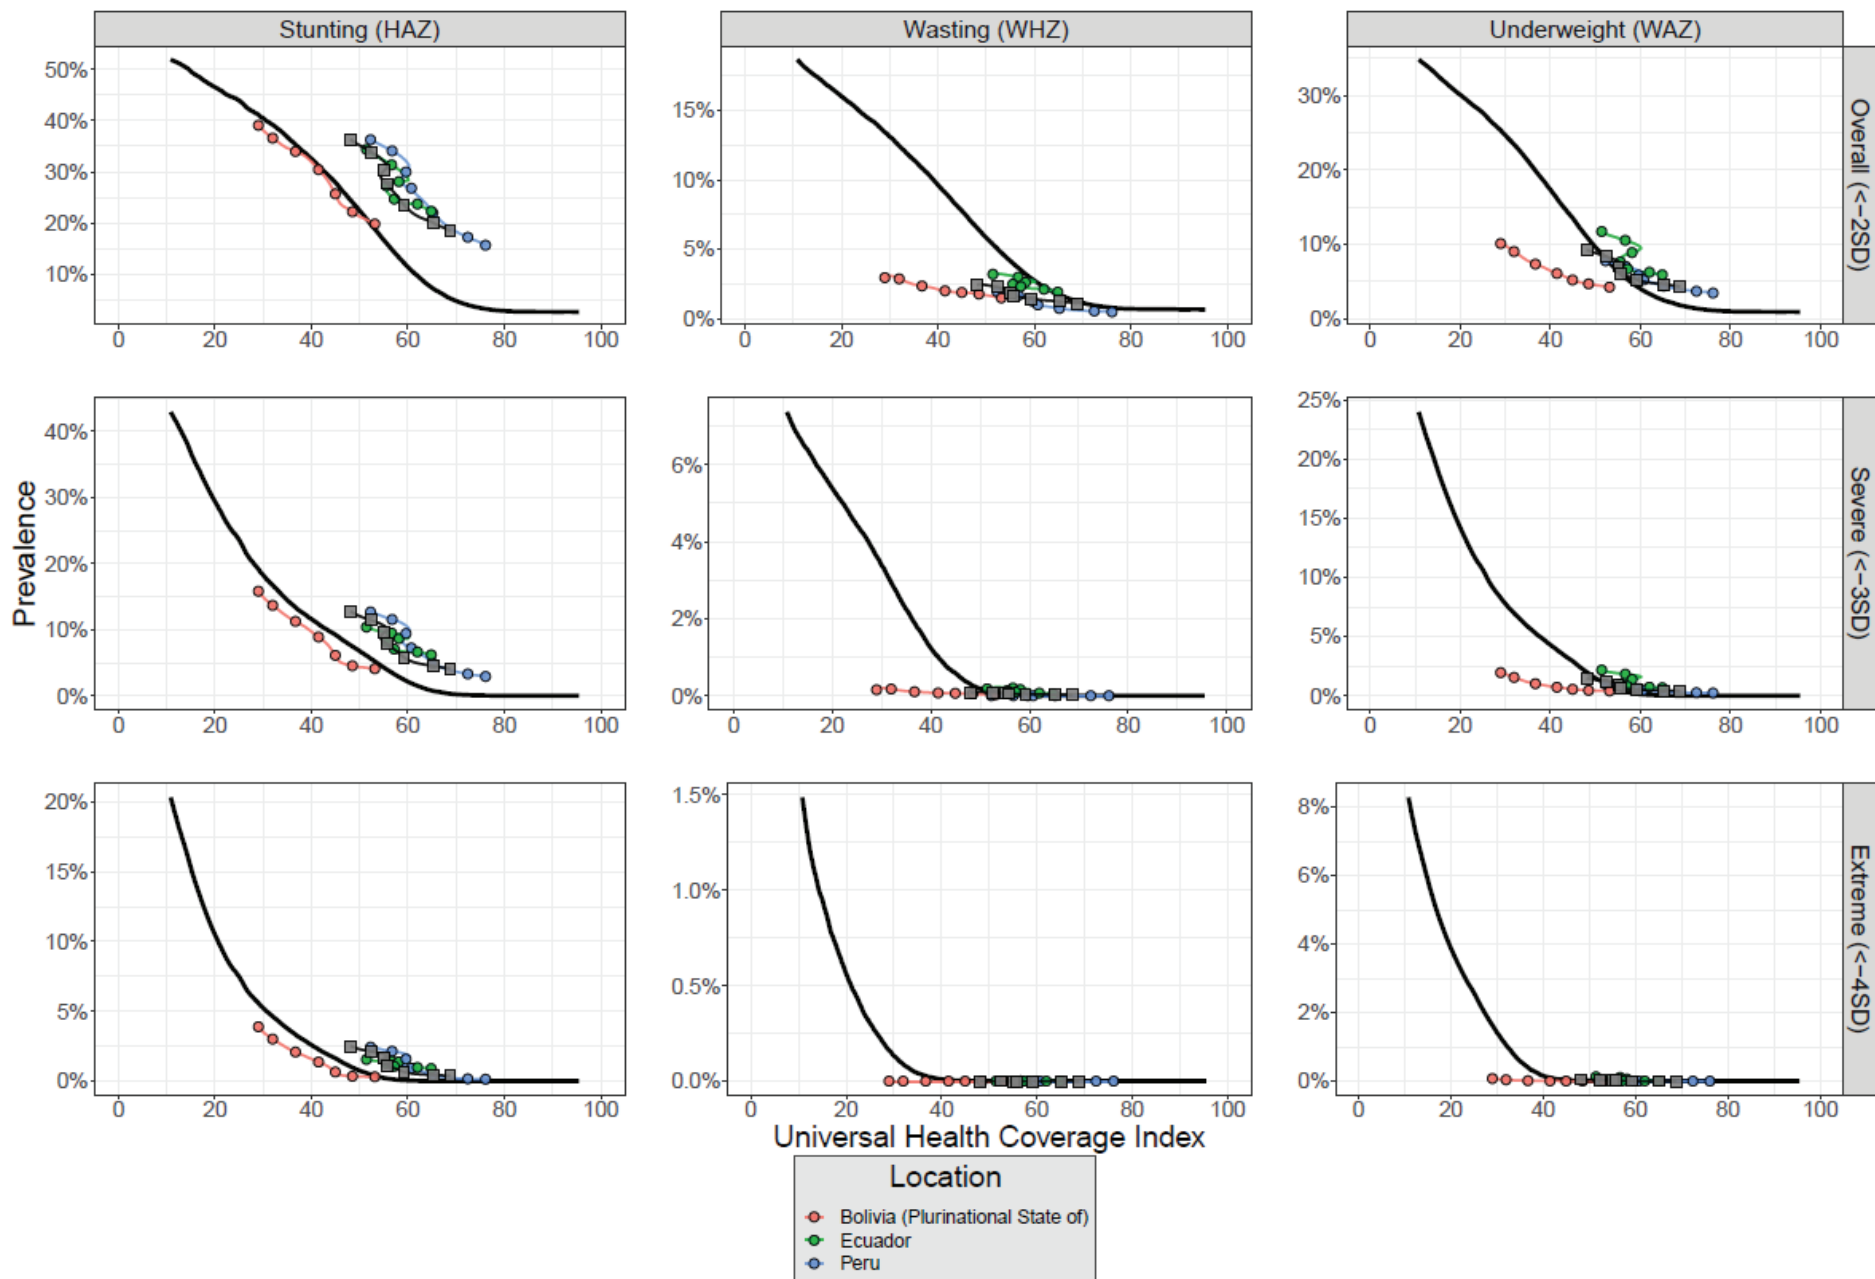

## J. Caribbean

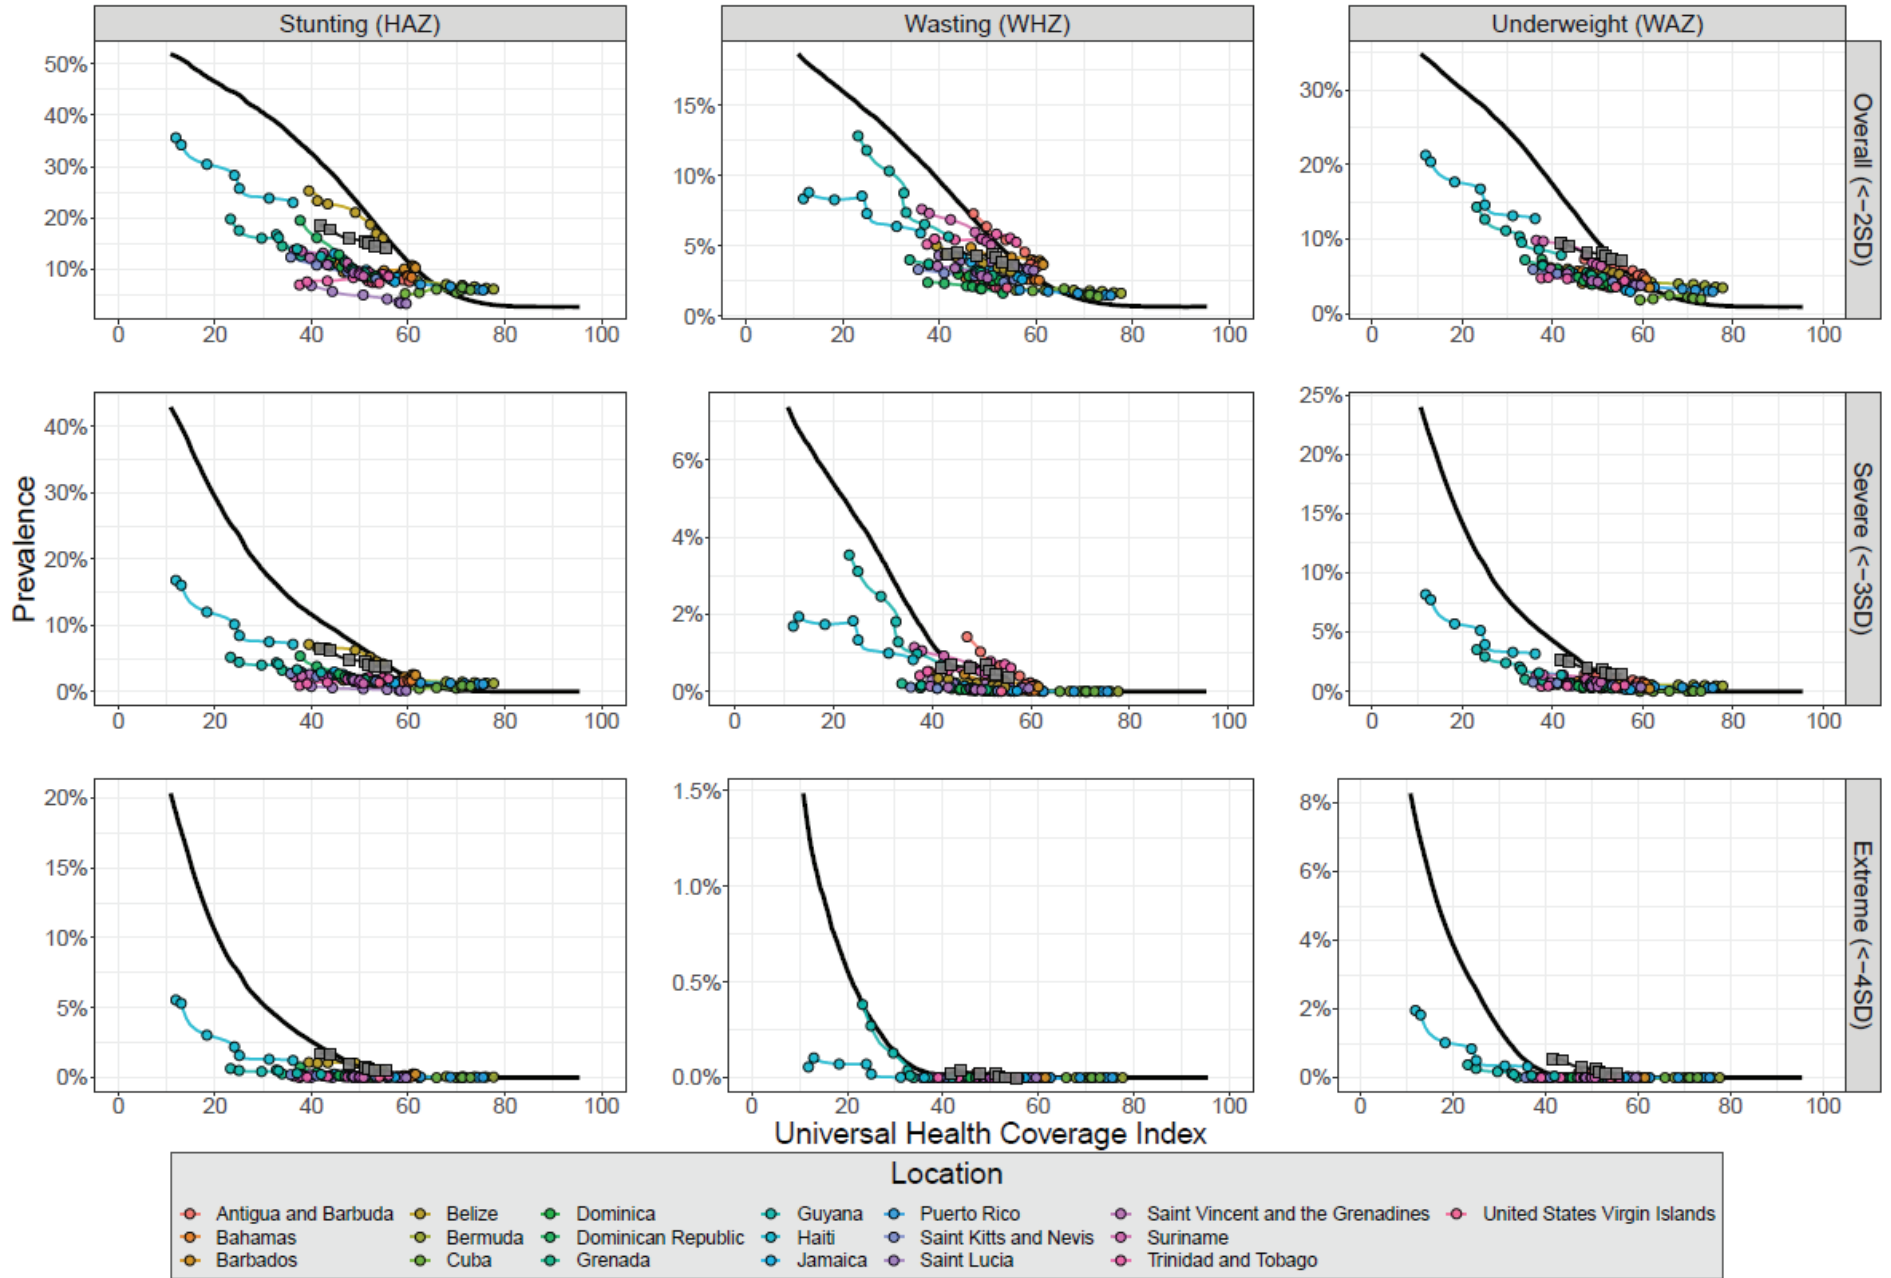

## K. Central Latin America

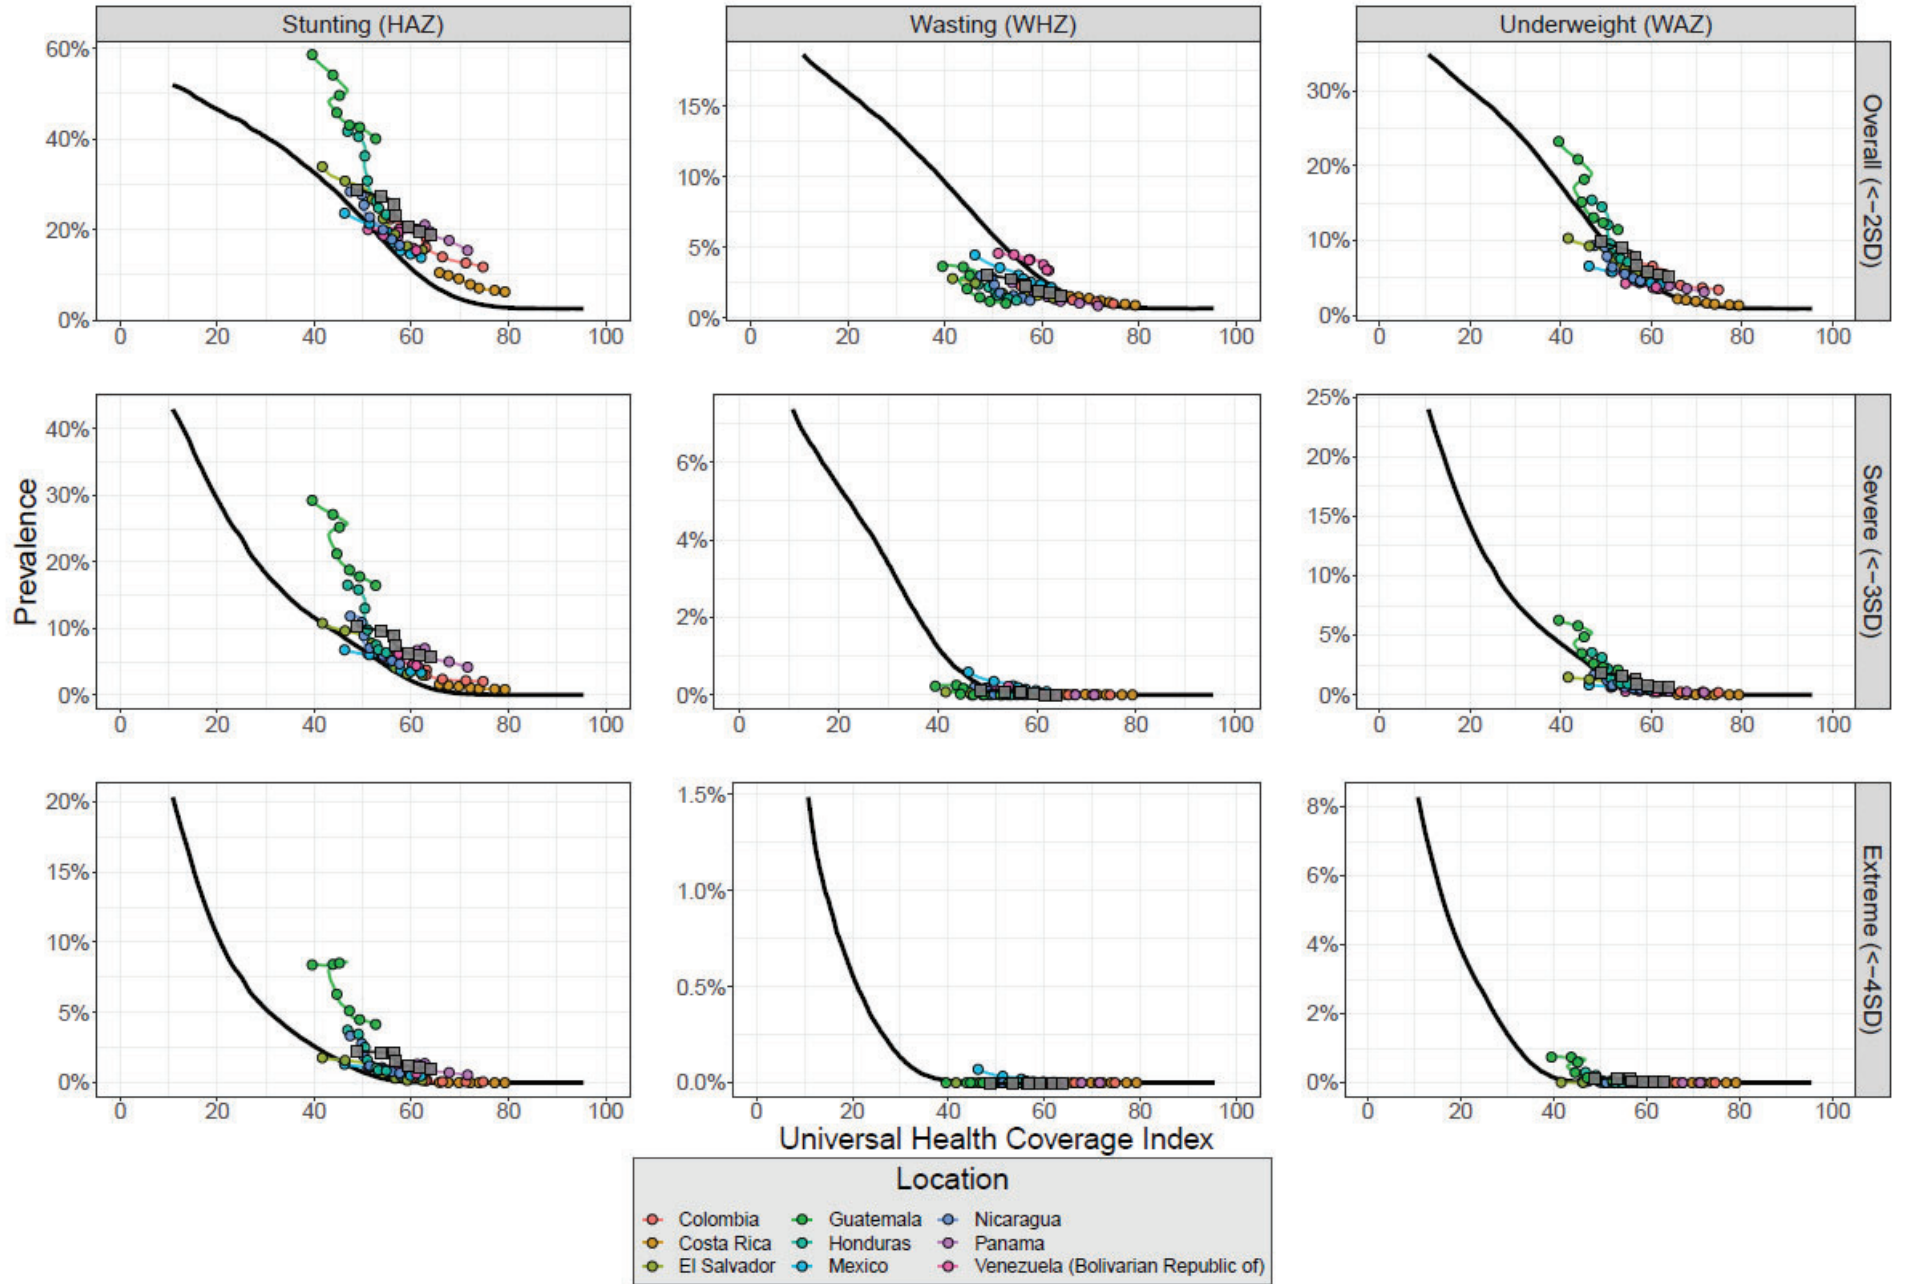

## L. Tropical Latin America

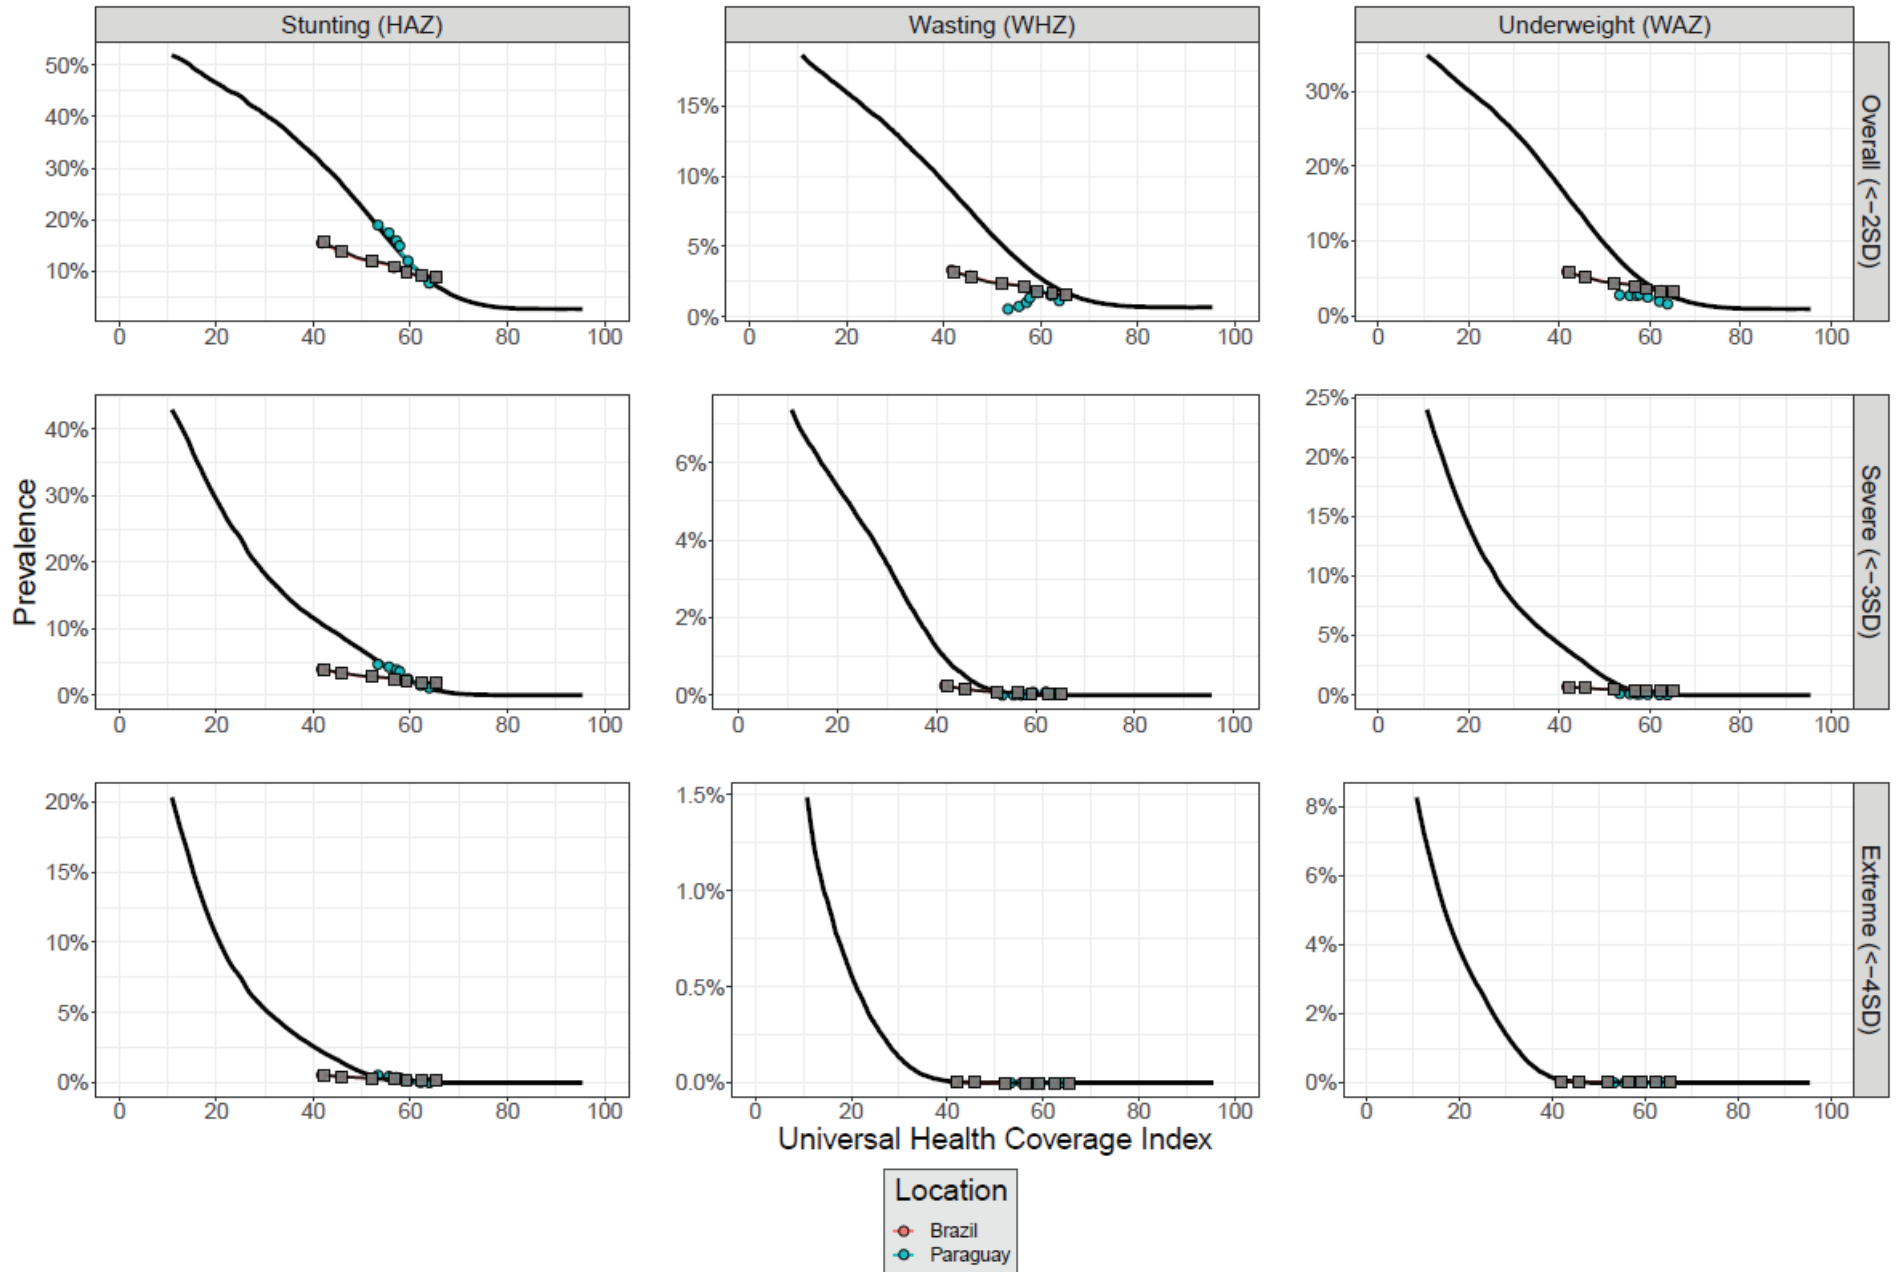

### M. North Africa and Middle East

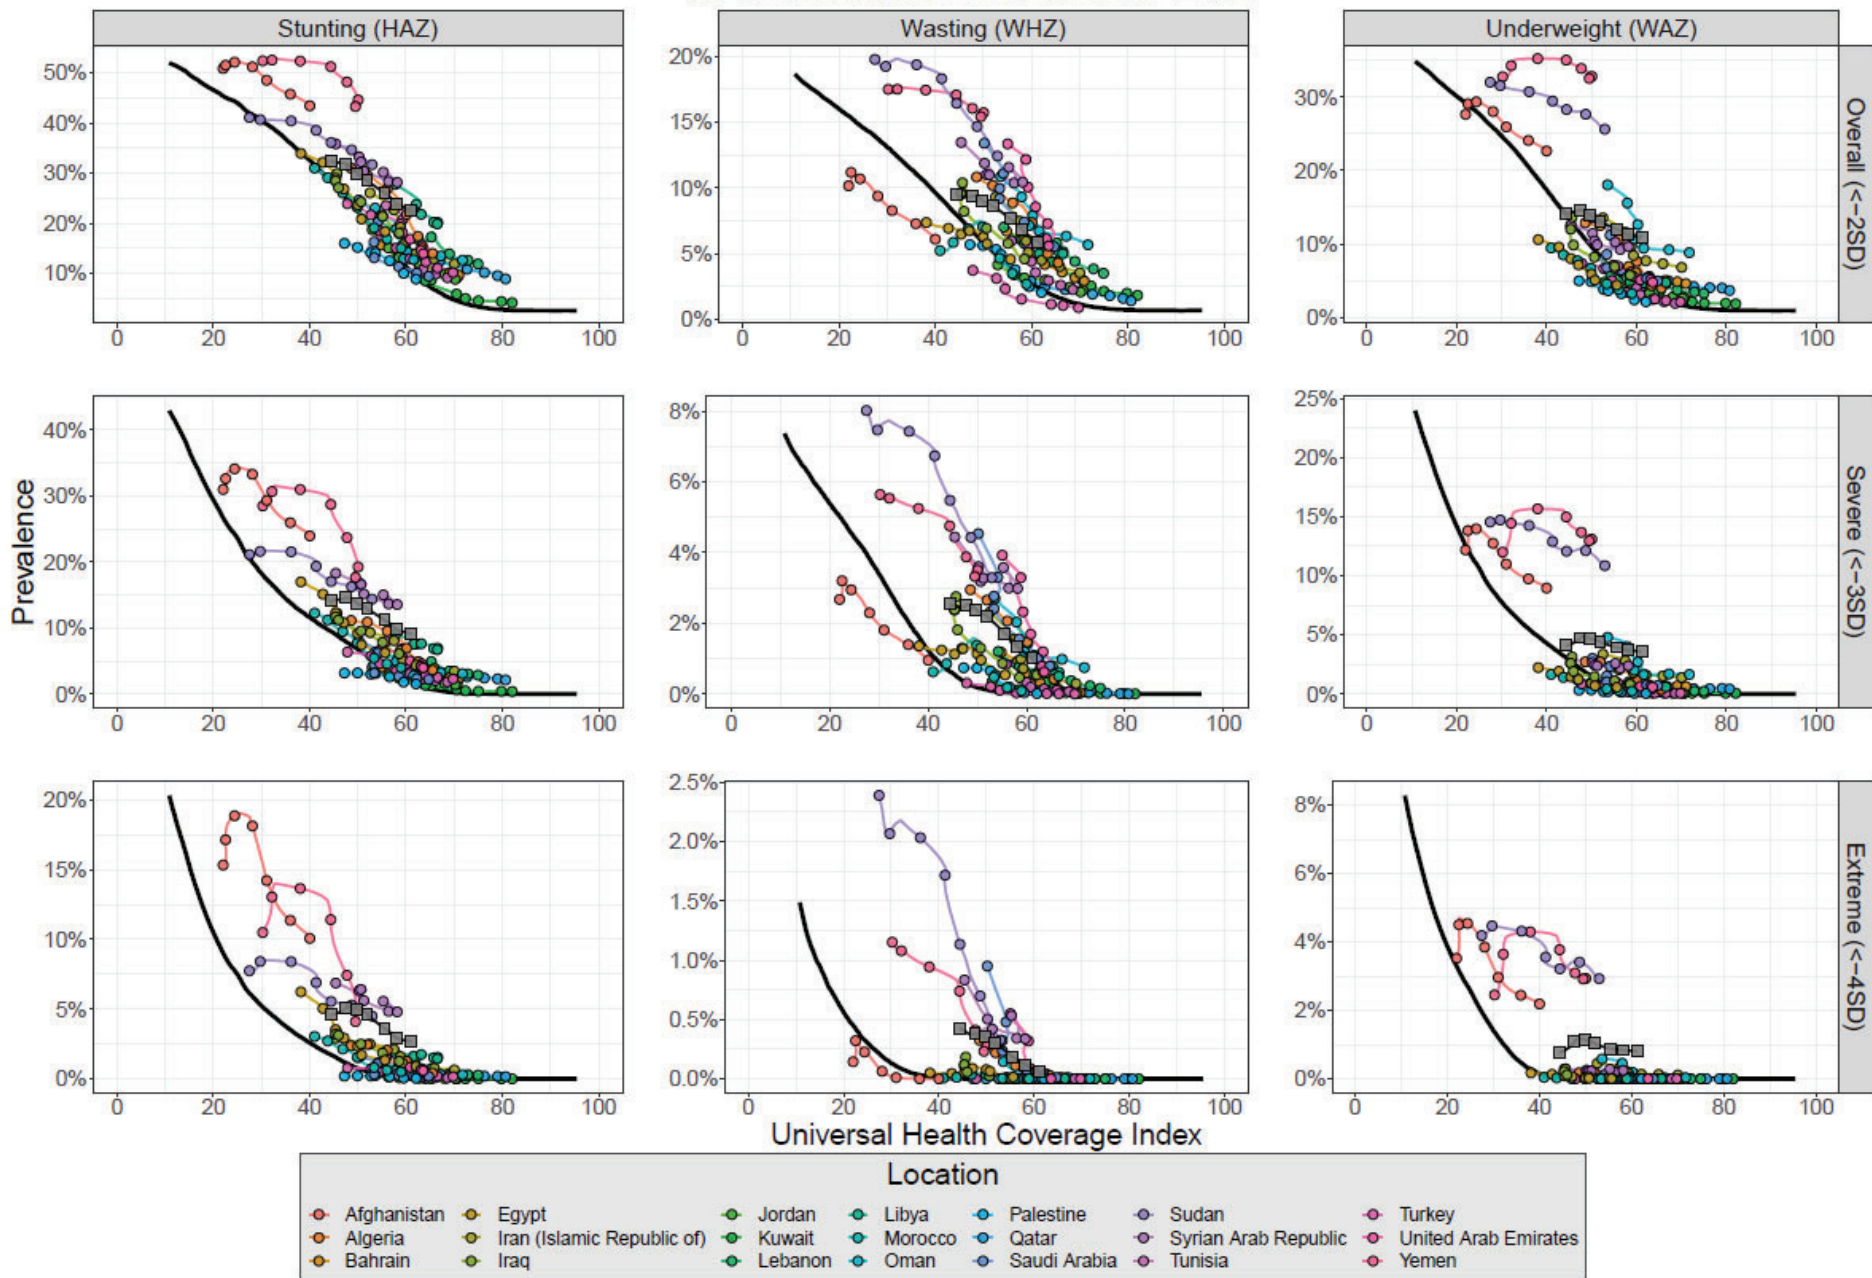

## N. South Asia

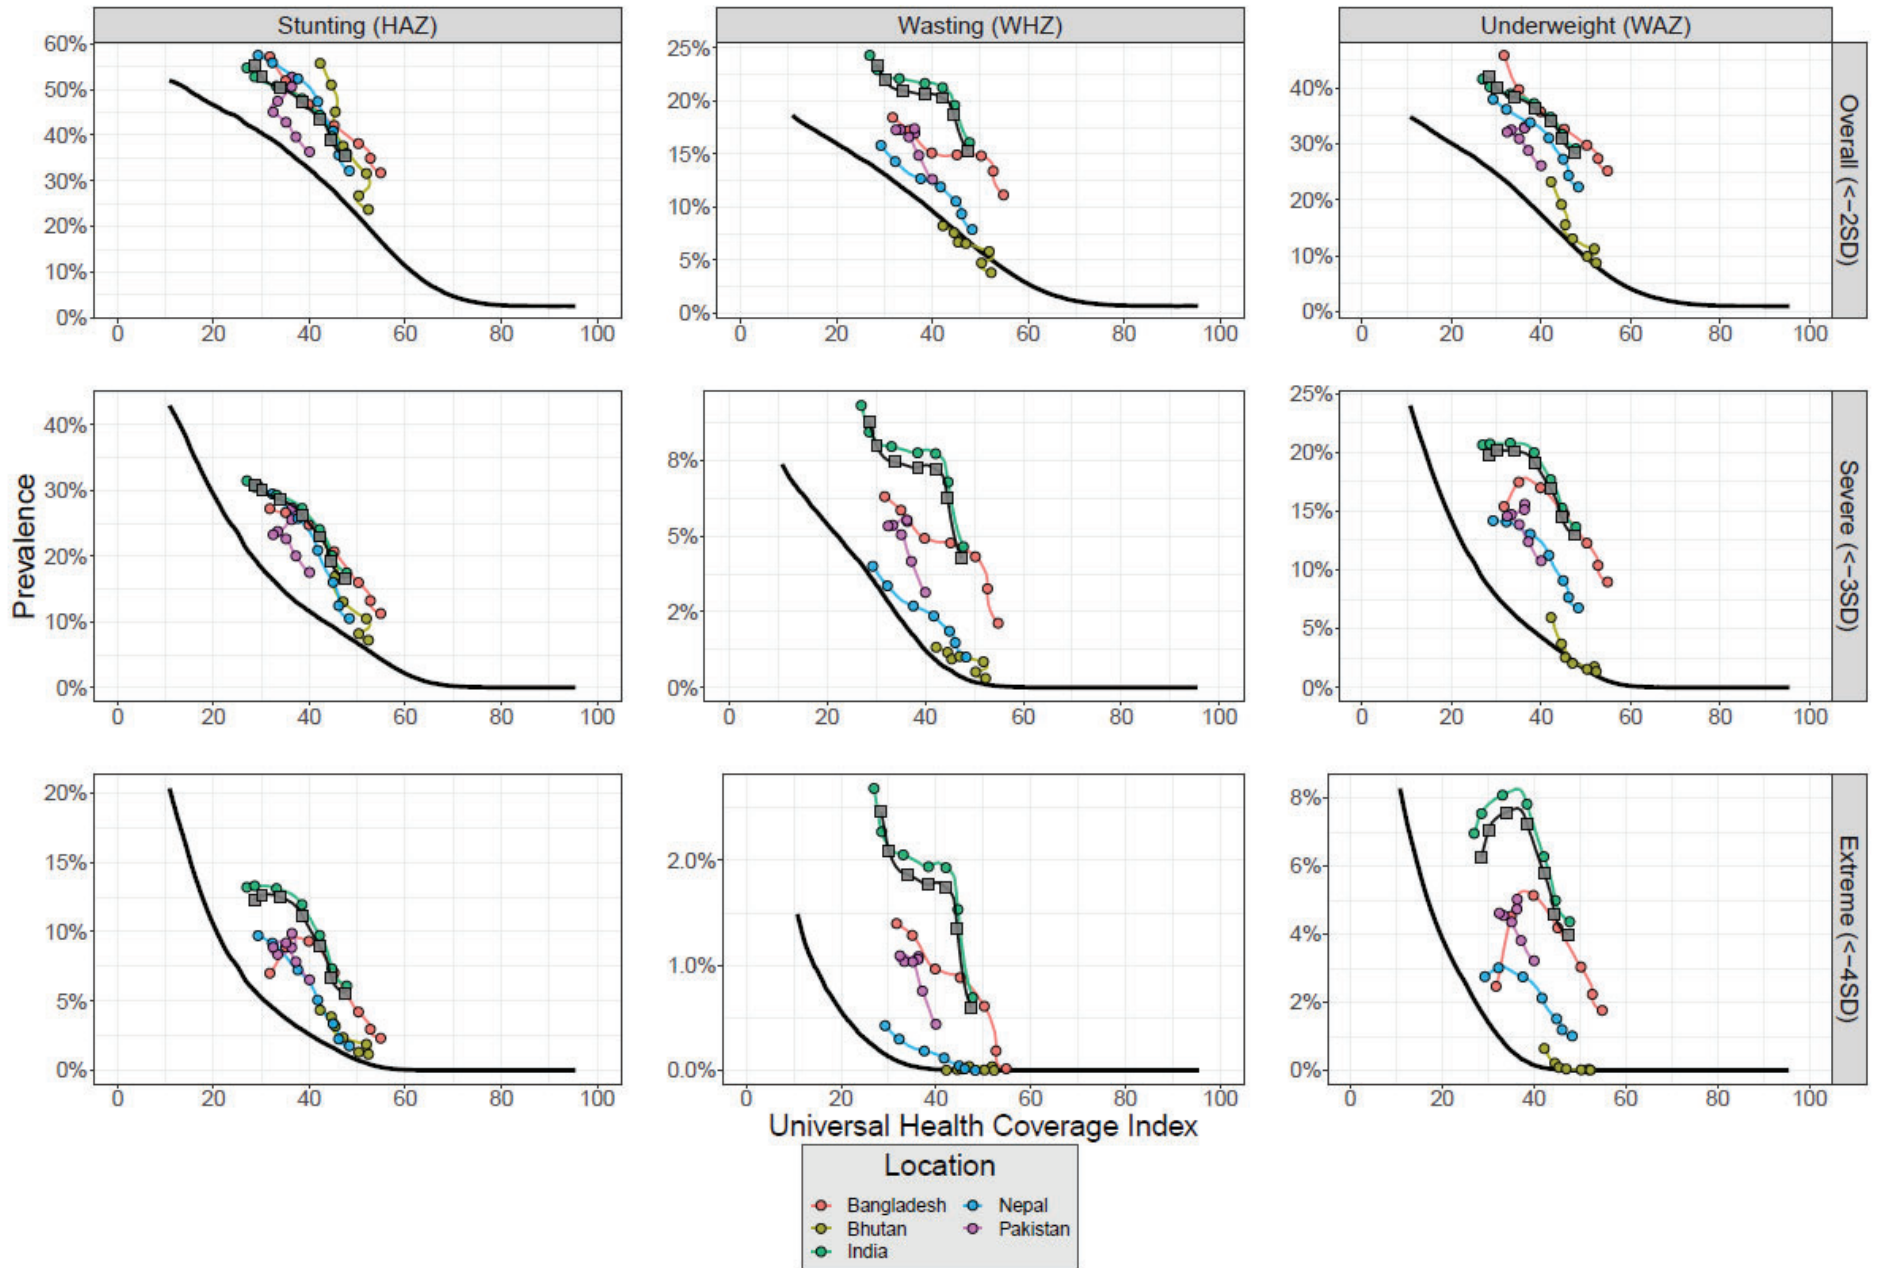



## O. East Asia

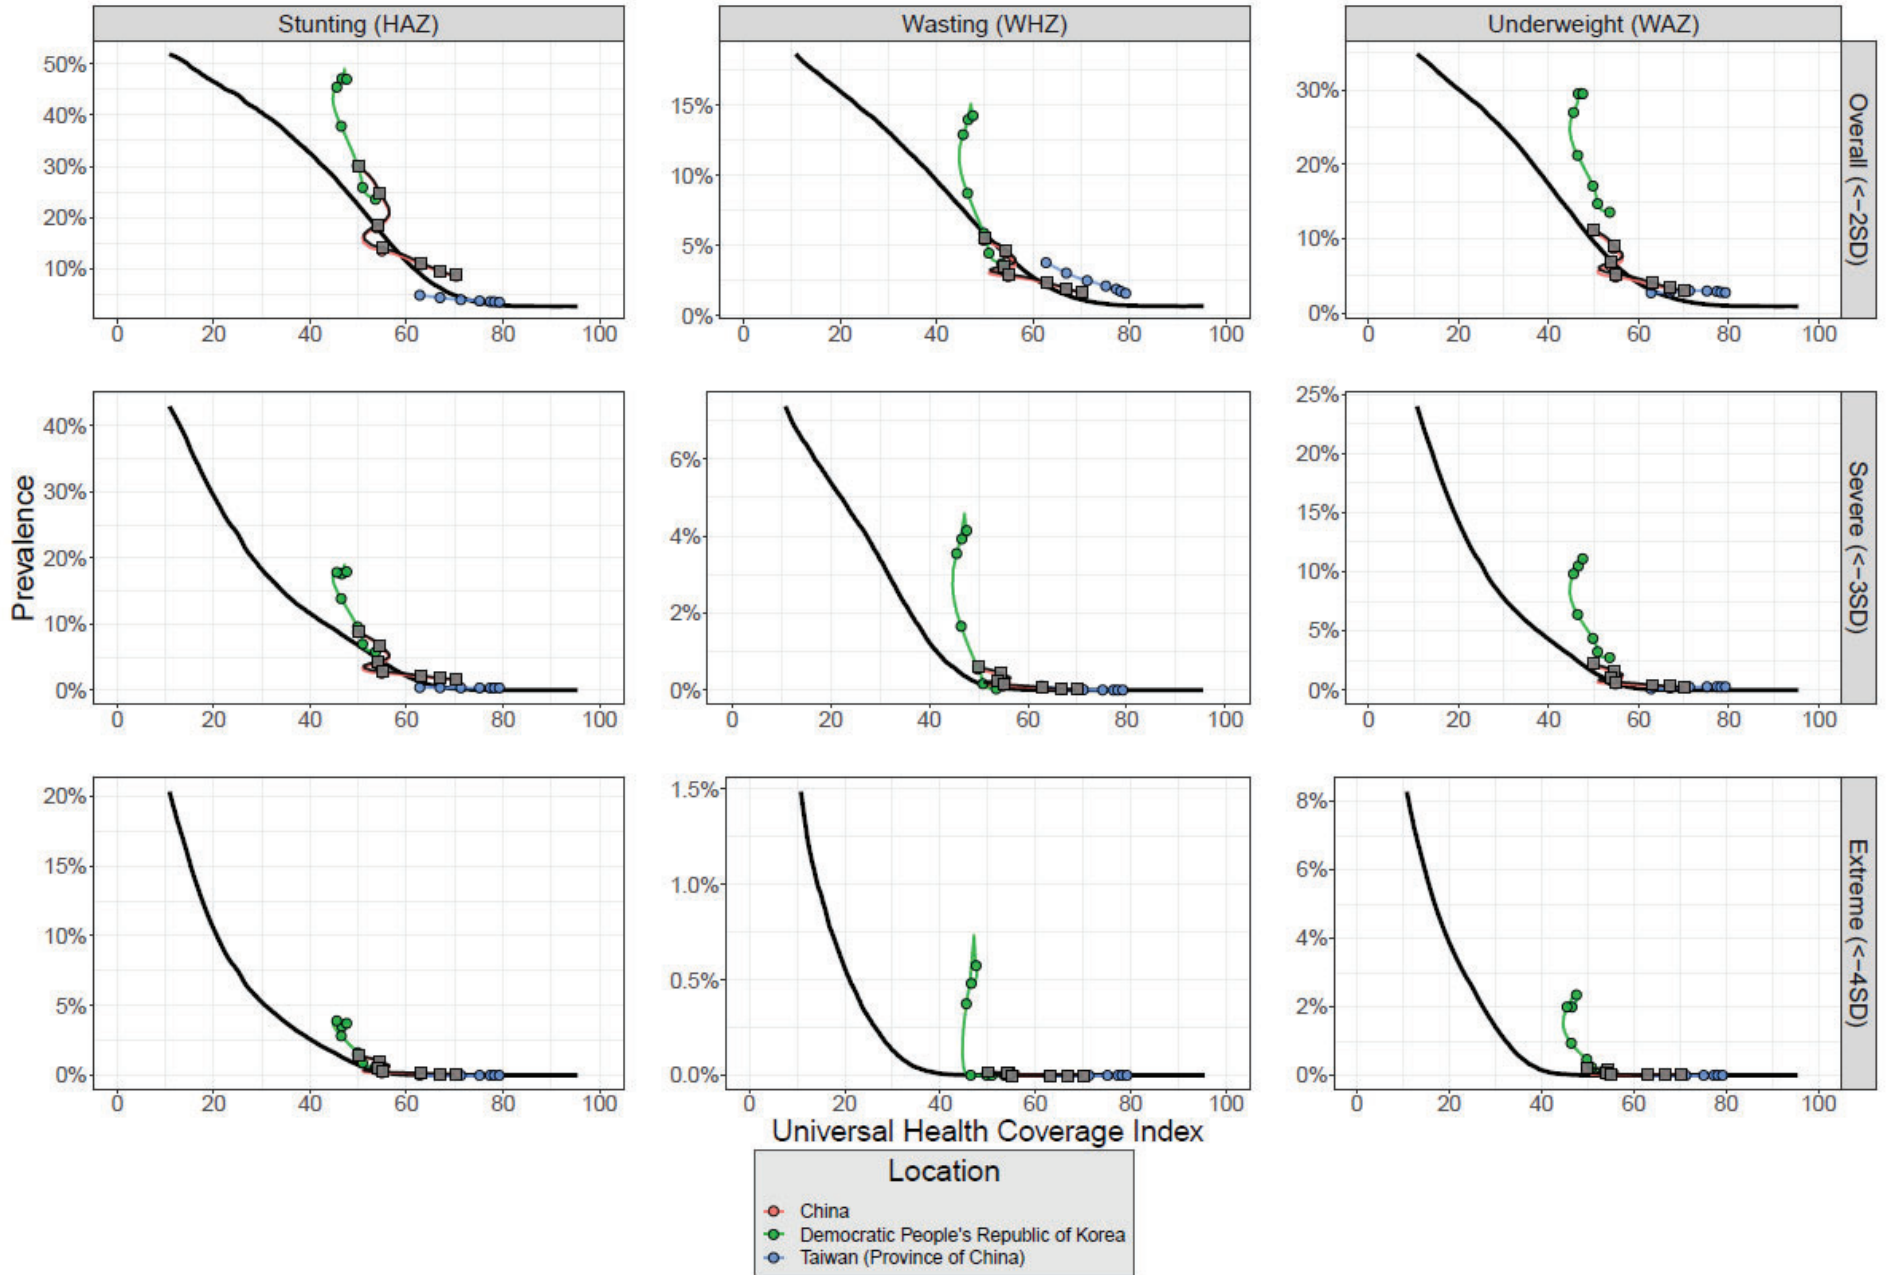

## P. Oceania

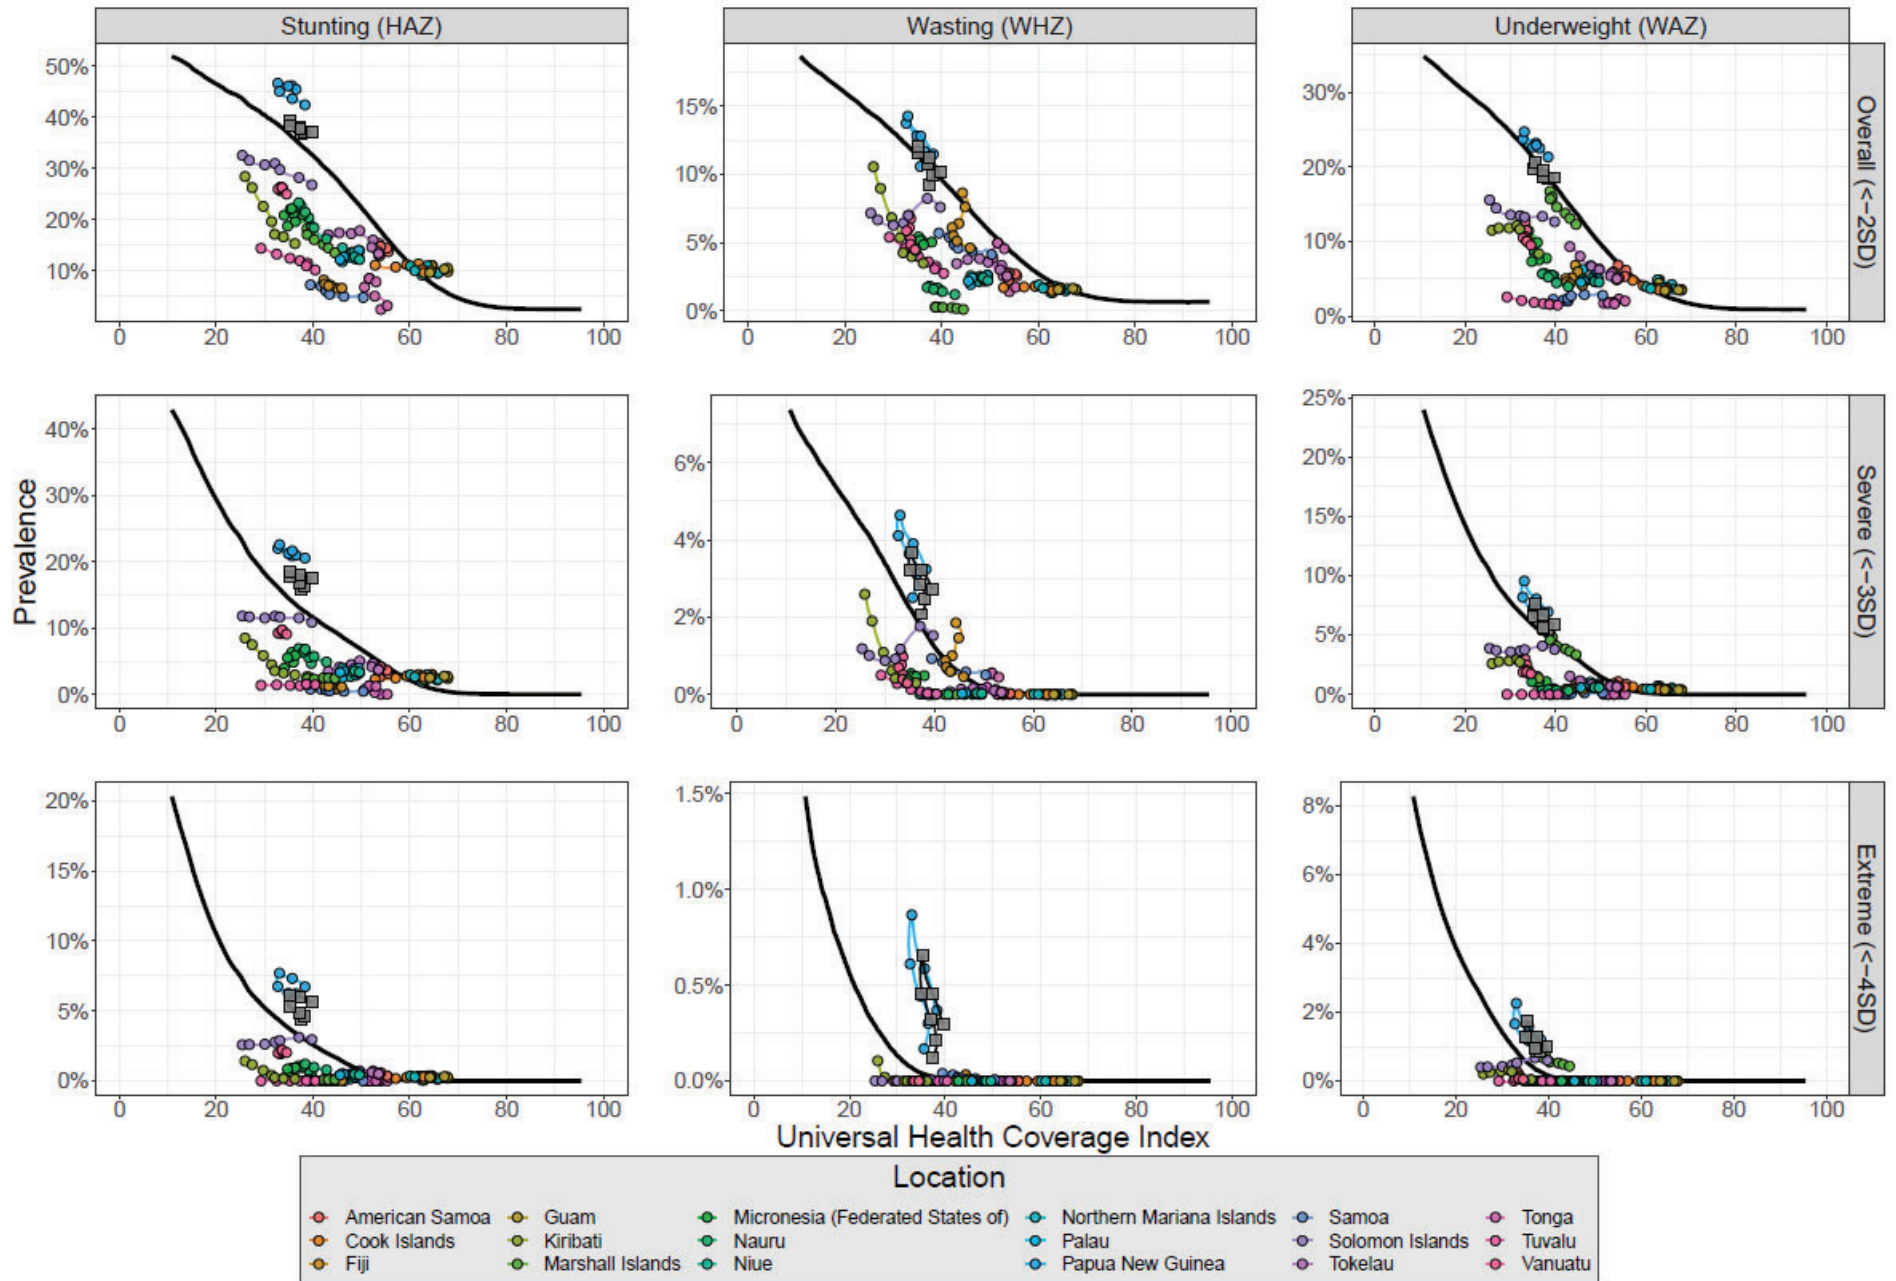

### Q. Southeast Asia

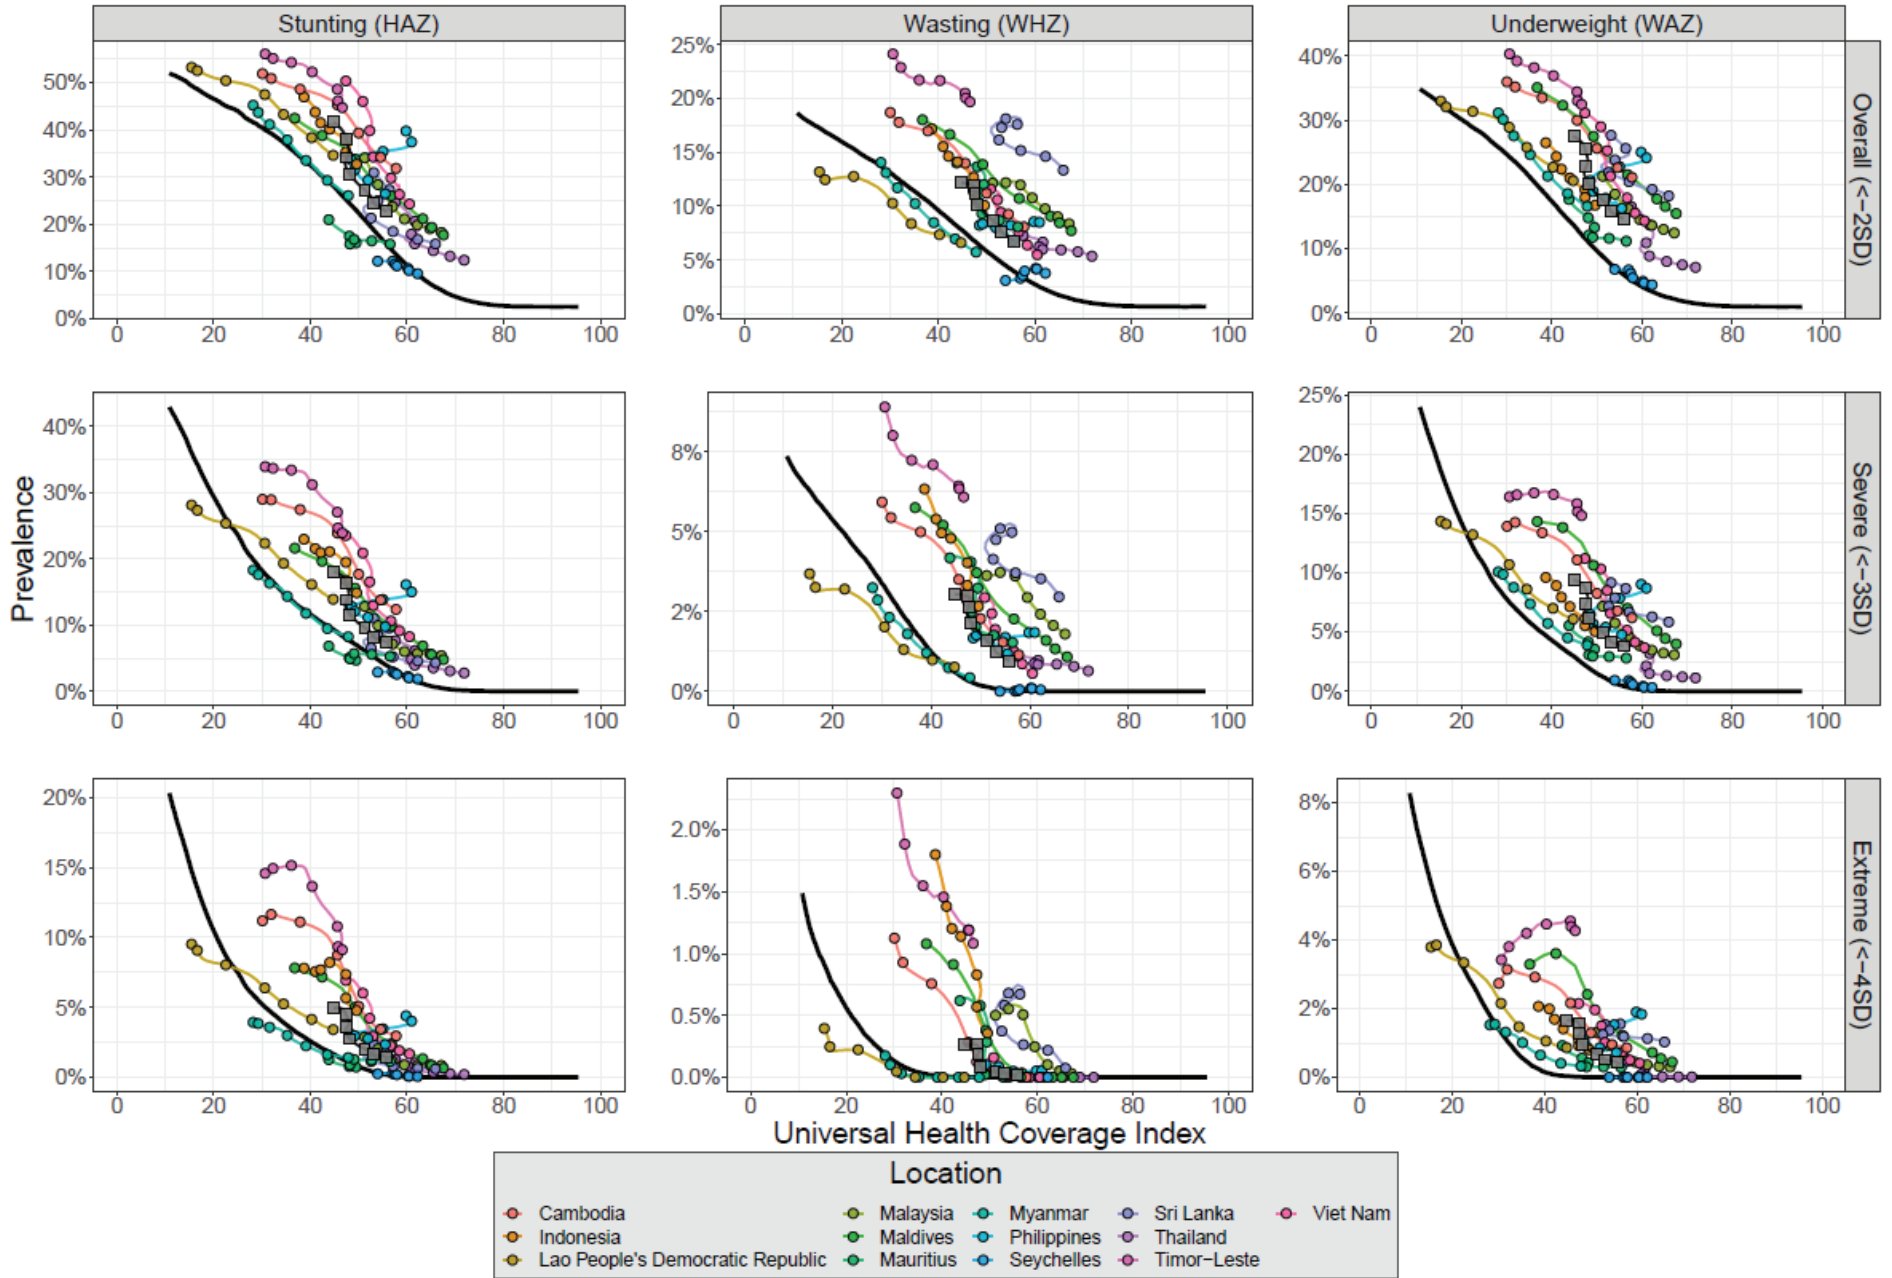

## R. Central Sub-Saharan Africa

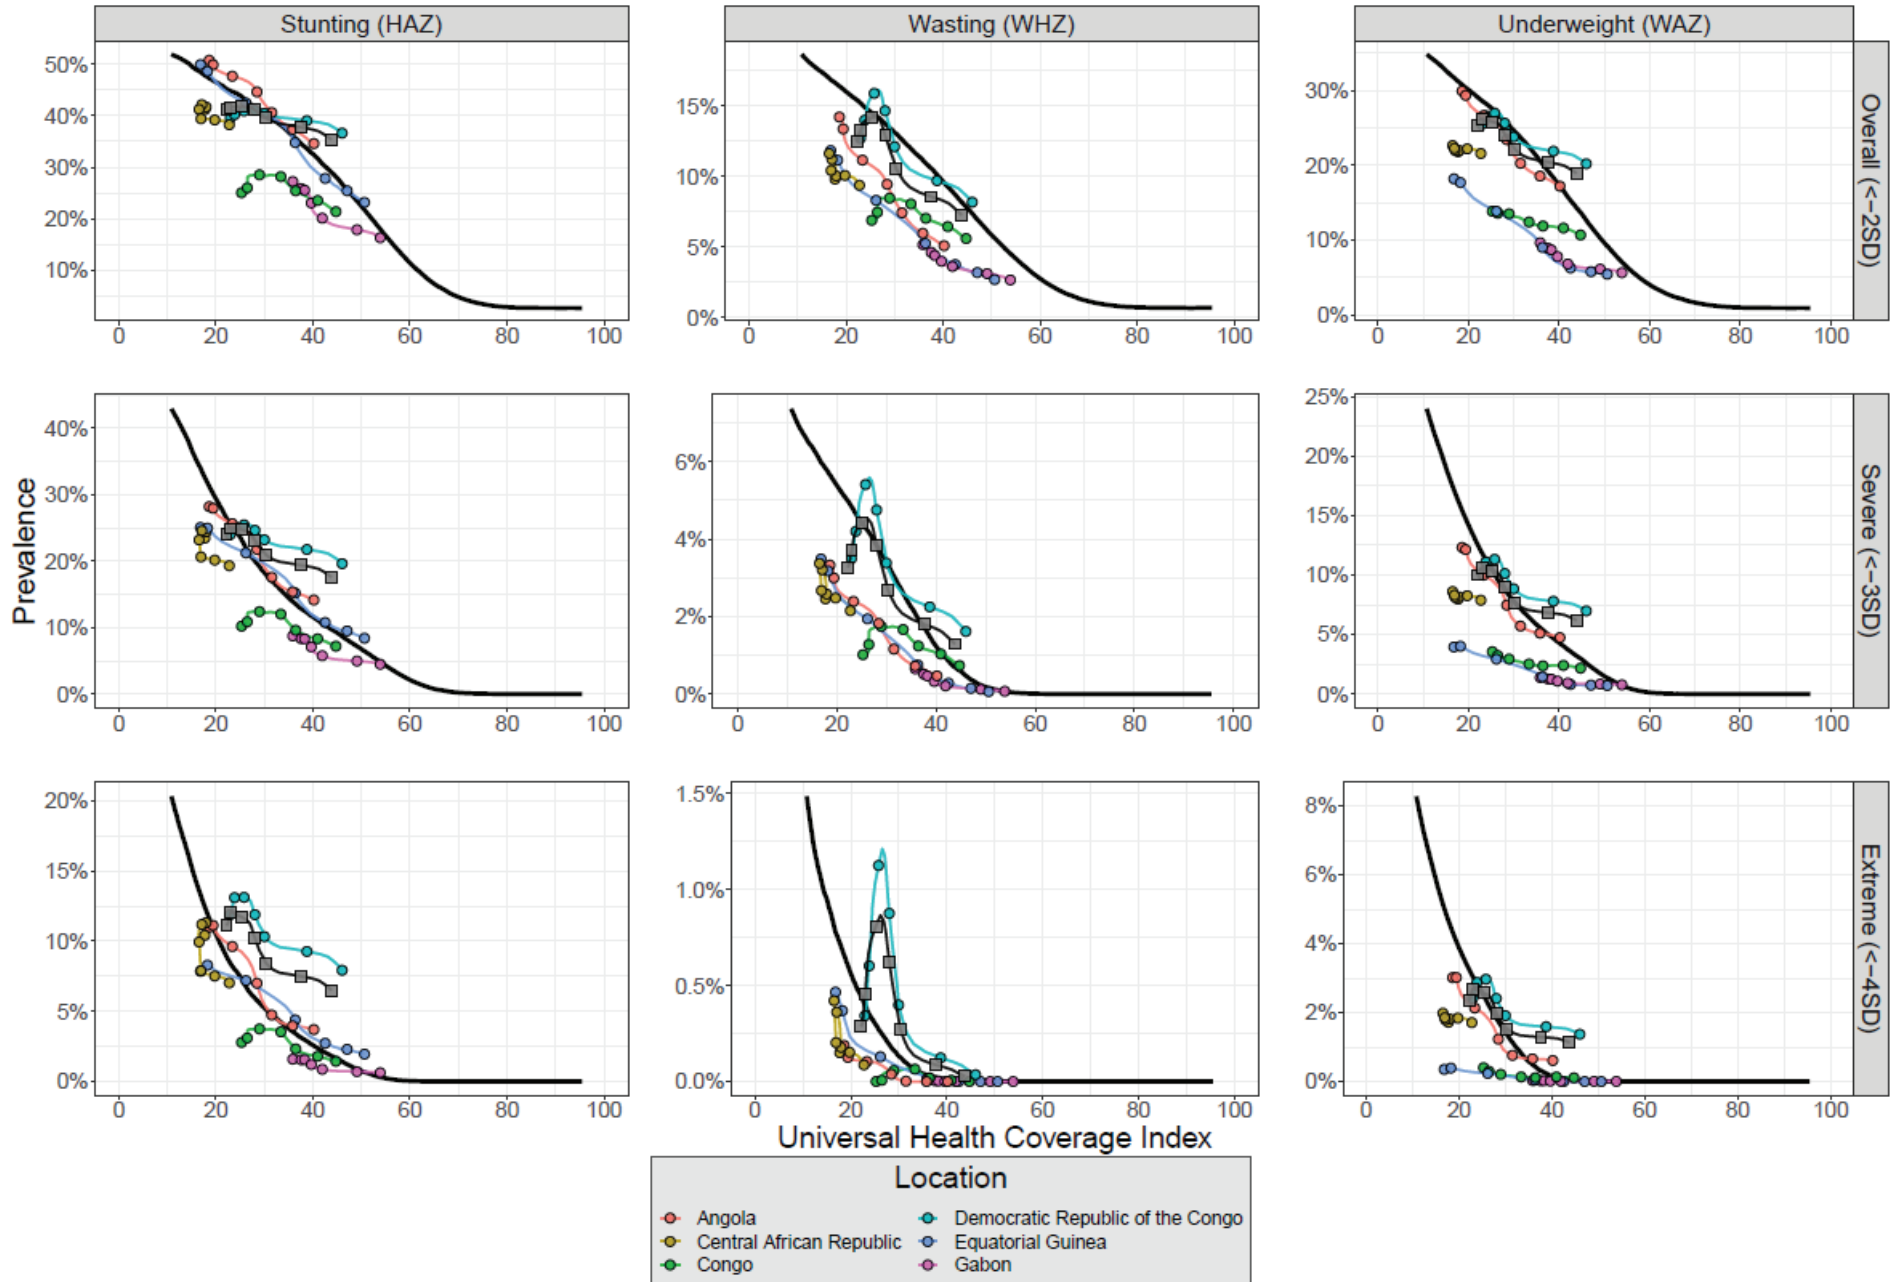

## S. Eastern Sub-Saharan Africa

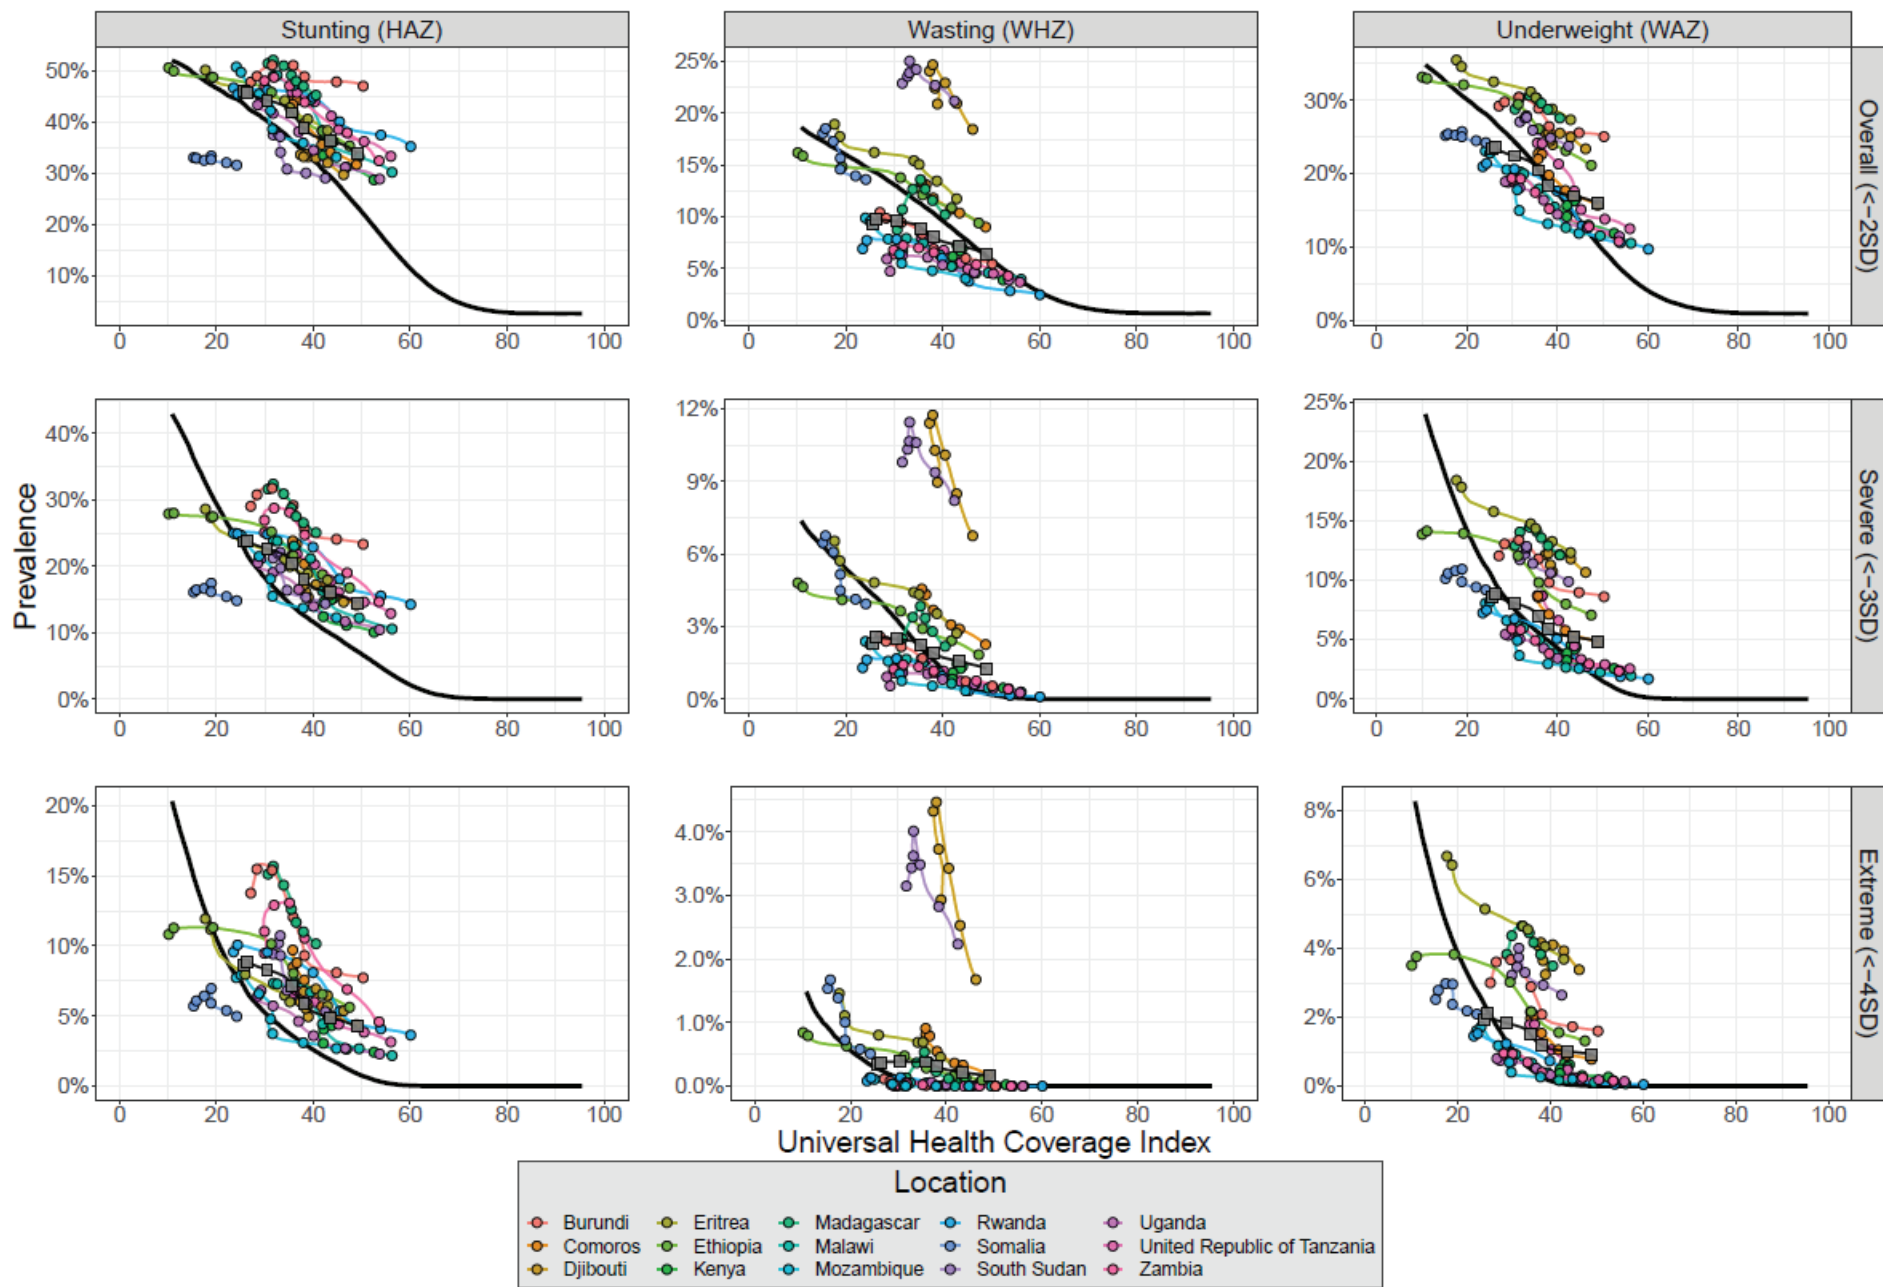

## T. Southern Sub-Saharan Africa

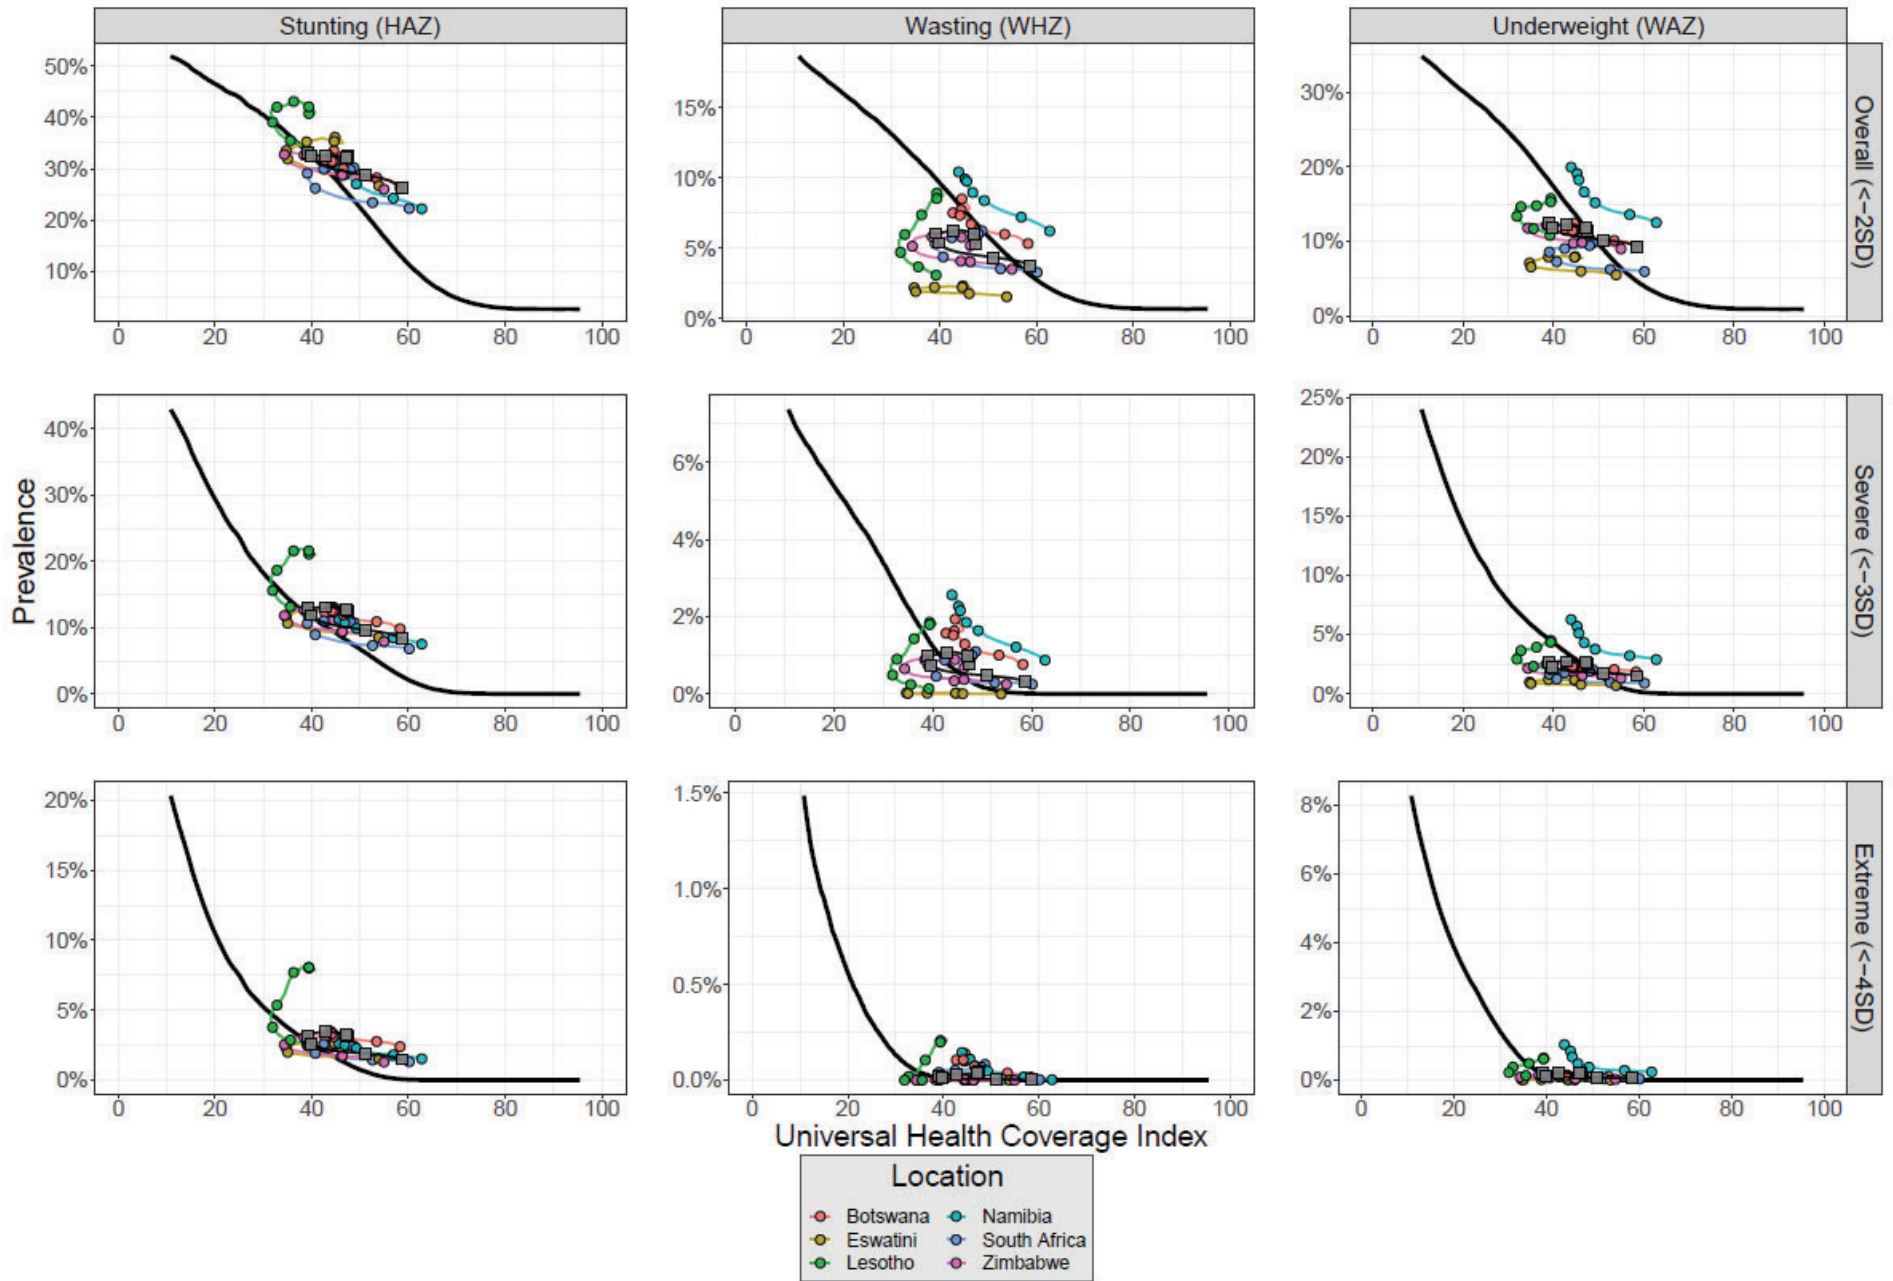

## U. Western Sub-Saharan Africa

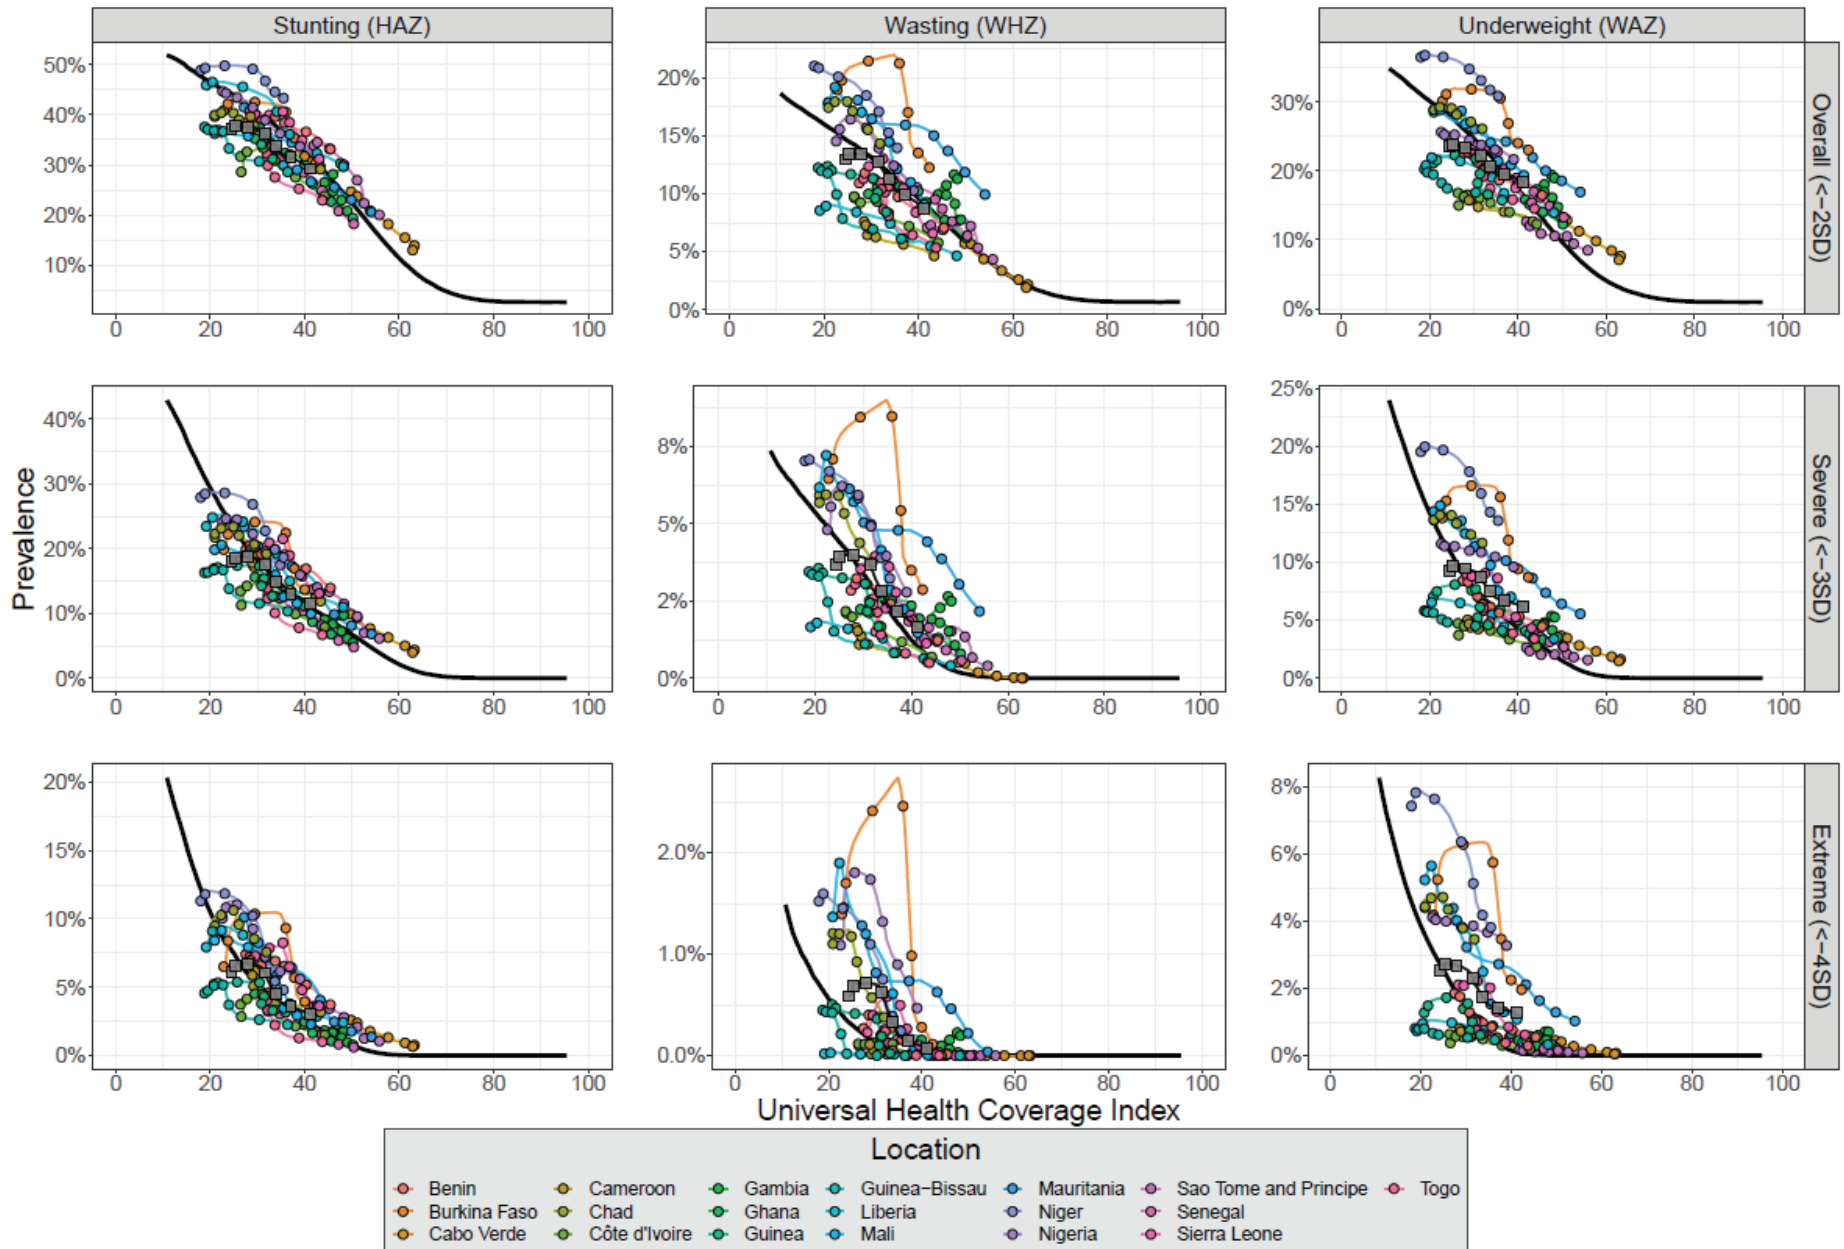

**Fig. S8. Expected relative CGF progress across a wide range of Socio-demographic Index.** Expected values of overall, severe, and extreme CGF are scaled to show how trajectories of stunting, wasting, and underweight as UHC index improves. Prevalences have been scaled to demonstrate expected relative changes as UHC index improves from the minimum observed UHC Index value. Expected values of CGF prevalence based on UHC Index are shown for SDI values of 20 (A, E, I), 40 (B,F, J), 60 (C, G, K) and 80 (D, H, L) for stunting, wasting, and underweight, respectively, to highlight that more extreme forms of CGF are sensitive to UHC Index changes across a wide range of SDI values.

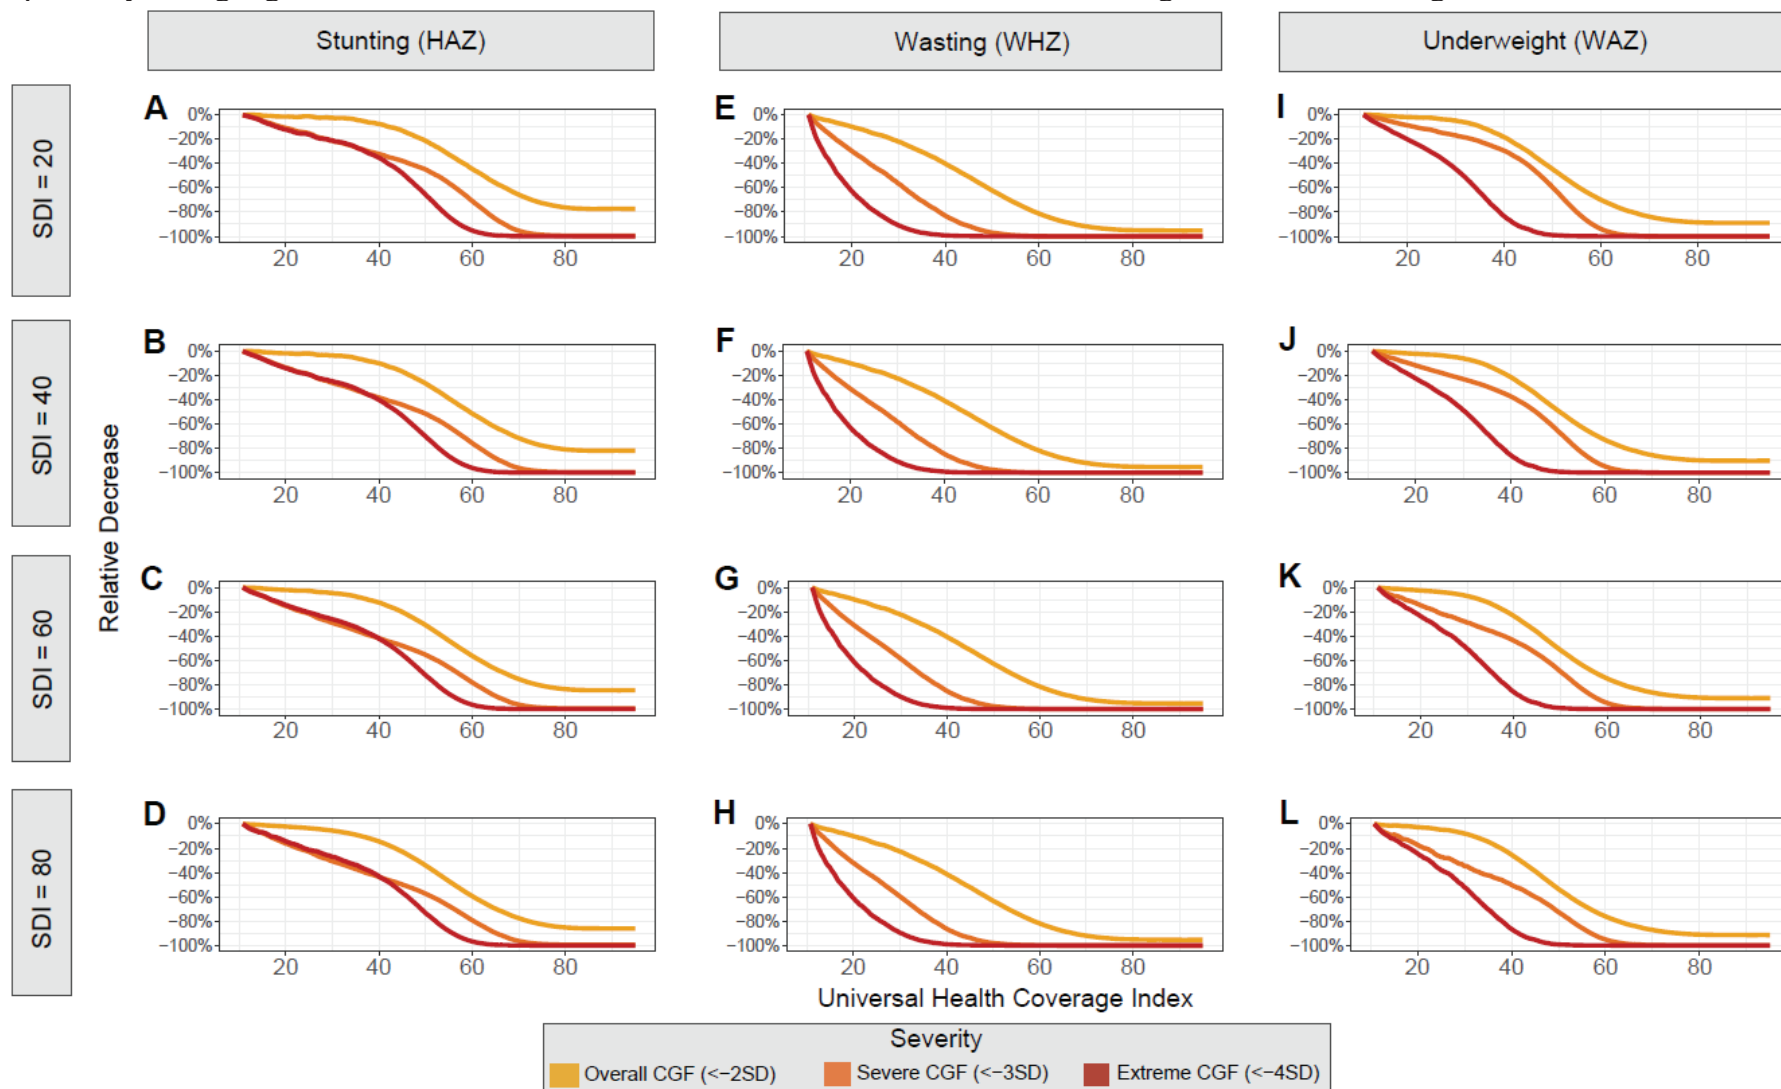



**Data S1a-g. Spatio-temporal Gaussian Process Regression (ST-GPR) results for overall, severe, and mean CGF by location, including location-specific data sources; and distributions of stunting [HAZ], wasting [WHZ], and underweight [WAZ] for children under age five, both sexes, for every five years from 1990–2020.** Country results are grouped by GBD super-region, including Central Europe, Eastern Europe, and Central Asia (S1a), High-income (S1b), Latin America and Caribbean (S1c), North Africa and Middle East (S1d), South Asia (S1e), Southeast Asia, East Asia, and Oceania (S1f), and Sub-Saharan Africa (S1g). Plots for each country include overall and severe stunting prevalence (A) and transformed mean stunting Z scores (B). A source list is shown which includes surveys included in the stunting models (C). Additional plots are shown for overall and severe wasting prevalence (D) and transformed mean wasting Z scores (E), followed by a source list with surveys included in the wasting models (F). Plots are then shown for overall and severe underweight prevalence (G), and transformed mean underweight Z scores (H), with a source list listing surveys included in the underweight models (I). Finally, distributions of stunting (J), wasting (K), and underweight (L) are shown for children under age five, both sexes, for every five years from 1990-2020. Surveys that were outliered are shown with X's on all plots. Surveys prior to 1990 may have been inputs to the models to inform trends, but estimates are only produced and shown for 1990–2020. For locations that are modeled nationally and subnationally, sources that are only included subnationally are not included in the plots of national level estimates. These sources were included in subnational models that influence national level models. Note that due to the transformation on mean Z scores, increasing values reflect improvements in mean Z score. Surveys conducted over a range of years were assigned to the midpoint year from that interval, which is the year reflected in the table and the plots. For the distributions of stunting, wasting, and underweight, the area under the curve reflects the estimated proportion of children experiencing that severity of CGF or worse. DHS is Demographic and Health Surveys. MICS is Multiple Indicator Cluster Survey. WHO CGM is the WHO Global Database on Child Growth and Malnutrition. SDNS is Survey of Diet and Nutritional Status. **The files are organized by GBD Super Region with ordering as follows:**

**Data S1a: Central Europe, Eastern Europe, and Central Asia:**

**Central Asia:** Armenia, Azerbaijan, Georgia, Kazakhstan, Kyrgyzstan, Mongolia, Tajikistan, Turkmenistan, Uzbekistan

**Central Europe:** Albania, Bosnia and Herzegovina, Bulgaria, Croatia, Czechia, Hungary, Montenegro, North Macedonia, Poland, Romania, Serbia, Slovakia, Slovenia,

**Eastern Europe:** Belarus, Estonia, Latvia, Lithuania, Republic of Moldova, Russian Federation, Ukraine

**Data S1b: High Income:**

**Australasia:** Australia, New Zealand

**High-income Asia Pacific:** Brunei Darussalam, Japan, Republic of Korea, Singapore

**High-income North America:** Canada, Georgia, United States of America

**Southern Latin America:** Argentina, Chile, Uruguay

**Western Europe:** Andorra, Austria, Belgium, Cyprus, Denmark, Finland, France, Germany, Greece, Iceland, Ireland, Israel, Italy, Luxembourg, Malta, Monaco, Netherlands, Norway, Portugal, San Marino, Spain, Sweden, Switzerland, United Kingdom

**Data S1c: Latin America and the Caribbean:**

**Andean Latin America:** Bolivia (Plurinational State of), Ecuador, Peru

**Caribbean:** Antigua and Barbuda, Bahamas, Barbados, Belize, Cuba, Dominica, Dominican Republic, Grenada, Guyana, Haiti, Jamaica, Saint Kitts and Nevis, Saint Lucia, Saint Vincent and the Grenadines, Suriname, Trinidad and Tobago

**Central Latin America:** Colombia, Costa Rica, El Salvador, Guatemala, Honduras, Mexico, Nicaragua, Panama, Venezuela (Bolivarian Republic of)

**Tropical Latin America:** Brazil, Paraguay

**Data S1d: North Africa and the Middle East:**

Algeria, Bahrain, Egypt, Iran (Islamic Republic of), Iraq, Jordan, Kuwait, Lebanon, Libya, Morocco, Oman, Palestine, Qatar, Saudi Arabia, Syrian Arab Republic, Tunisia, Turkey, United Arab Emirates, Yemen, Afghanistan, Sudan

**Data S1e: South Asia:**

Bangladesh, Bhutan, India, Nepal, Pakistan

**Data S1f: Southeast Asia, East Asia, and Oceania:**

**East Asia:** China, Democratic People's Republic of Korea, Taiwan (Province of China)

**Oceania:** Fiji, Kiribati, Marshall Islands, Micronesia (Federated States of), Nauru, Palau, Papua New Guinea, Samoa, Solomon Islands, Tonga, Tuvalu, Vanuatu

**Southeast Asia:** Cambodia, Indonesia, Lao People's Democratic Republic, Malaysia, Maldives, Mauritius, Myanmar, Philippines, Seychelles, Sri Lanka, Thailand, Timor-Leste, Viet Nam

**Data S1g: sub-Saharan Africa:**

**Central sub-Saharan Africa:** Angola, Central African Republic, Congo, Democratic Republic of the Congo, Equatorial Guinea, Gabon

**Eastern Sub-Saharan Africa:** Burundi, Comoros, Djibouti, Eritrea, Ethiopia, Kenya, Madagascar, Malawi, Mozambique, Rwanda, Somalia, South Sudan, Uganda, United Republic of Tanzania, Zambia

**Southern Sub-Saharan Africa:** Botswana, Eswatini, Lesotho, Namibia, South Africa, Zimbabwe

**Western Sub-Saharan Africa:** Benin, Burkina Faso, Cabo Verde, Cameroon, Chad, Côte d'Ivoire, Gambia, Ghana, Guinea, Guinea-Bissau, Liberia, Mali, Mauritania, Niger, Nigeria, Sao Tome and Principe, Senegal, Sierra Leone, Togo

**Data S2. Age-sex specific fits of MR-BRT models for all forms and severities of CGF, 1990-2020.** Prevalence models were fit in logit space, but are also shown in linear space for comparison. Figures shown include: overall stunting [HAZ < -2 standard deviations (SD)] prevalence shown in logit and linear space for males (A, B) and females (C, D); severe stunting [HAZ < -3 SD] for males (E, F) and females (G, H); extreme stunting [HAZ < -4 SD] for males (I, J) and females (K, L); overall wasting [WHZ < -2 SD] for males (M, N) and females (O, P); severe wasting [WHZ < -3 SD] for males (Q, R) and females (S, T); extreme wasting [WHZ < -4 SD] for males (U, V) and females (W, X); overall underweight [WAZ < -2 SD] for males (Y, Z) and females (AA, BB); severe underweight [WAZ < -3 SD] for males (CC, DD) and females (EE, FF); and extreme underweight [WAZ < -4 SD] for males (GG, HH) and females (II, JJ). Models were fit in logit space, but are also shown in linear space for comparison. All years were used as inputs to the models, but only 1990, 2000, 2010, and 2020 are shown here for simplicity.

**Data S3. Ensemble MR-BRT knot placements and weight given to each sub-model, for all forms and severities of CGF, by sex.** Twenty MR-BRT models with different knot placements were fit to each age-sex, weighted based by their predictive performance. Knots 1 and 6 were always respectively placed at the lowest and highest estimated UHC index values input to the model. Knot placements for overall stunting in males and females are shown in (A, B), followed by severe stunting (C, D), extreme stunting (E, F), overall wasting (G, H), severe wasting (I, J), extreme wasting (K, L), overall underweight (M, N), severe underweight (O, P), and extreme underweight (Q, R)

**Data S4. Age-sex specific fits of MR-BRT models for all forms and severities of CGF, 1990-2020, with incorporation of SDI as a linear covariate.** Prevalence models were fit in logit space, but are also shown in linear space for comparison. Figures shown include: overall stunting [HAZ < -2 standard deviations (SD)] prevalence shown in logit and linear space for males (A, B) and females (C, D); severe stunting [HAZ < -3 SD] for males (E, F) and females (G, H); extreme stunting [HAZ < -4 SD] for males (I, J) and females (K, L); overall wasting [WHZ < -2 SD] for males (M, N) and females (O, P); severe wasting [WHZ < -3 SD] for males (Q, R) and females (S, T); extreme wasting [WHZ < -4SD] for males (U, V) and females (W, X); overall underweight [WAZ < -2 SD] for males (Y, Z) and females (AA, BB); severe underweight [WAZ < -3 SD] for males (CC, DD) and females (EE, FF); and extreme underweight [WAZ < -4 SD] for males (GG, HH) and females (II, JJ). Models were fit in logit space, but are also shown in linear space for comparison. All years were used as inputs to the models, but only 1990, 2000, 2010, and 2020 are shown here for simplicity. In these MR-BRT models, a linear covariate of Socio-demographic index (SDI) was incorporated, unlike the MR-BRT models shown in Fig. S6. The four black lines represent the expected values of CGF prevalence for a given location with SDI values of 20, 40, 60, and 80, with the highest SDI value having the lowest predicted CGF prevalence.
